# Supplementary material for: Development of a versatile high-throughput mutagenesis assay with multiplexed short-read NGS using DNA-barcoded supF shuttle vector library amplified in E. coli
Source: eLife. 2022 Oct 10;11:e83780. doi: 10.7554/eLife.83780 (PMC9584611; doi:10.7554/eLife.83780)
Supplement: Figure 1—source data 1. — The each N12-BC library was independently amplified by PCR with a forward primer (BC12-IDXX-NX-F) and a reverse primer (BC12-NX-R). Pre-designed 6-nucleotide sequence (N6) were shown in red color. [file elife-83780-fig1-data1.xlsx]

## Sheet: Sheet1
Primer Name	Sequence (5’ to 3’)
(Forward N0)
BC12-ID01-F	ATGCAATTAATTGTAAAGGCCTCAGCGAATT
BC12-ID02-F	ATGCAAGGAATTGTAAAGGCCTCAGCGAATT
BC12-ID03-F	ATGCAACCAATTGTAAAGGCCTCAGCGAATT
BC12-ID04-F	ATGCTTAATTTTGTAAAGGCCTCAGCGAATT
BC12-ID05-F	ATGCTTGGTTTTGTAAAGGCCTCAGCGAATT
BC12-ID06-F	ATGCTTCCTTTTGTAAAGGCCTCAGCGAATT
BC12-ID07-F	ATGCGGAAGGTTGTAAAGGCCTCAGCGAATT
BC12-ID08-F	ATGCGGTTGGTTGTAAAGGCCTCAGCGAATT
BC12-ID09-F	ATGCGGCCGGTTGTAAAGGCCTCAGCGAATT
BC12-ID10-F	ATGCCCAACCTTGTAAAGGCCTCAGCGAATT
BC12-ID11-F	ATGCCCTTCCTTGTAAAGGCCTCAGCGAATT
BC12-ID12-F	ATGCCCGGCCTTGTAAAGGCCTCAGCGAATT
BC12-ID13-F	ATGCAATTGGTTGTAAAGGCCTCAGCGAATT
BC12-ID14-F	ATGCAAGGTTTTGTAAAGGCCTCAGCGAATT
BC12-ID15-F	ATGCTTAAGGTTGTAAAGGCCTCAGCGAATT
BC12-ID16-F	ATGCTTGGAATTGTAAAGGCCTCAGCGAATT
BC12-ID17-F	ATGCGGAATTTTGTAAAGGCCTCAGCGAATT
BC12-ID18-F	ATGCGGTTAATTGTAAAGGCCTCAGCGAATT
BC12-ID19-F	ATGCAATTCCTTGTAAAGGCCTCAGCGAATT
BC12-ID20-F	ATGCAACCTTTTGTAAAGGCCTCAGCGAATT
BC12-ID21-F	ATGCTTAACCTTGTAAAGGCCTCAGCGAATT
BC12-ID22-F	ATGCTTCCAATTGTAAAGGCCTCAGCGAATT
BC12-ID23-F	ATGCCCAATTTTGTAAAGGCCTCAGCGAATT
BC12-ID24-F	ATGCCCTTAATTGTAAAGGCCTCAGCGAATT
Primer Name	Sequence (5’ to 3’)
(Forward N1)
BC12-ID25-N-F	NATGCAAGGCCTTGTAAAGGCCTCAGCGAATT
BC12-ID26-N-F	NATGCAACCGGTTGTAAAGGCCTCAGCGAATT
BC12-ID27-N-F	NATGCGGAACCTTGTAAAGGCCTCAGCGAATT
BC12-ID28-N-F	NATGCGGCCAATTGTAAAGGCCTCAGCGAATT
BC12-ID29-N-F	NATGCCCAAGGTTGTAAAGGCCTCAGCGAATT
BC12-ID30-N-F	NATGCCCGGAATTGTAAAGGCCTCAGCGAATT
BC12-ID31-N-F	NATGCTTGGCCTTGTAAAGGCCTCAGCGAATT
BC12-ID32-N-F	NATGCTTCCGGTTGTAAAGGCCTCAGCGAATT
BC12-ID33-N-F	NATGCGGTTCCTTGTAAAGGCCTCAGCGAATT
BC12-ID34-N-F	NATGCGGCCTTTTGTAAAGGCCTCAGCGAATT
BC12-ID35-N-F	NATGCCCTTGGTTGTAAAGGCCTCAGCGAATT
BC12-ID36-N-F	NATGCCCGGTTTTGTAAAGGCCTCAGCGAATT
BC12-ID37-N-F	NATGCATAATATTGTAAAGGCCTCAGCGAATT
BC12-ID38-N-F	NATGCAGAAGATTGTAAAGGCCTCAGCGAATT
BC12-ID39-N-F	NATGCACAACATTGTAAAGGCCTCAGCGAATT
BC12-ID40-N-F	NATGCTATTATTTGTAAAGGCCTCAGCGAATT
BC12-ID41-N-F	NATGCTGTTGTTTGTAAAGGCCTCAGCGAATT
BC12-ID42-N-F	NATGCTCTTCTTTGTAAAGGCCTCAGCGAATT
BC12-ID43-N-F	NATGCGAGGAGTTGTAAAGGCCTCAGCGAATT
BC12-ID44-N-F	NATGCGTGGTGTTGTAAAGGCCTCAGCGAATT
BC12-ID45-N-F	NATGCGCGGCGTTGTAAAGGCCTCAGCGAATT
BC12-ID46-N-F	NATGCCACCACTTGTAAAGGCCTCAGCGAATT
BC12-ID47-N-F	NATGCCTCCTCTTGTAAAGGCCTCAGCGAATT
BC12-ID48-N-F	NATGCCGCCGCTTGTAAAGGCCTCAGCGAATT
Primer Name	Sequence (5’ to 3’)
(Forward N2)
BC12-ID49-NN-F	NNATGCATGATGTTGTAAAGGCCTCAGCGAATT
BC12-ID50-NN-F	NNATGCAGTAGTTTGTAAAGGCCTCAGCGAATT
BC12-ID51-NN-F	NNATGCTAGTAGTTGTAAAGGCCTCAGCGAATT
BC12-ID52-NN-F	NNATGCTGATGATTGTAAAGGCCTCAGCGAATT
BC12-ID53-NN-F	NNATGCGATGATTTGTAAAGGCCTCAGCGAATT
BC12-ID54-NN-F	NNATGCGTAGTATTGTAAAGGCCTCAGCGAATT
BC12-ID55-NN-F	NNATGCATCATCTTGTAAAGGCCTCAGCGAATT
BC12-ID56-NN-F	NNATGCACTACTTTGTAAAGGCCTCAGCGAATT
BC12-ID57-NN-F	NNATGCTACTACTTGTAAAGGCCTCAGCGAATT
BC12-ID58-NN-F	NNATGCTCATCATTGTAAAGGCCTCAGCGAATT
BC12-ID59-NN-F	NNATGCCATCATTTGTAAAGGCCTCAGCGAATT
BC12-ID60-NN-F	NNATGCCTACTATTGTAAAGGCCTCAGCGAATT
BC12-ID61-NN-F	NNATGCAGCAGCTTGTAAAGGCCTCAGCGAATT
BC12-ID62-NN-F	NNATGCACGACGTTGTAAAGGCCTCAGCGAATT
BC12-ID63-NN-F	NNATGCGACGACTTGTAAAGGCCTCAGCGAATT
BC12-ID64-NN-F	NNATGCGCAGCATTGTAAAGGCCTCAGCGAATT
BC12-ID65-NN-F	NNATGCCAGCAGTTGTAAAGGCCTCAGCGAATT
BC12-ID66-NN-F	NNATGCCGACGATTGTAAAGGCCTCAGCGAATT
BC12-ID67-NN-F	NNATGCTGCTGCTTGTAAAGGCCTCAGCGAATT
BC12-ID68-NN-F	NNATGCTCGTCGTTGTAAAGGCCTCAGCGAATT
BC12-ID69-NN-F	NNATGCGTCGTCTTGTAAAGGCCTCAGCGAATT
BC12-ID70-NN-F	NNATGCGCTGCTTTGTAAAGGCCTCAGCGAATT
BC12-ID71-NN-F	NNATGCCTGCTGTTGTAAAGGCCTCAGCGAATT
BC12-ID72-NN-F	NNATGCCGTCGTTTGTAAAGGCCTCAGCGAATT
Primer Name	Sequence (5’ to 3’)
(Reverse N0~2)
BC12-N0-R	CTAACCAAGTTCCTCTTTCAG
BC12-N1-R	NCTAACCAAGTTCCTCTTTCAG
BC12-N2-R	NNCTAAACCAAGTTCCTCTTTCAG
