# Supplementary material for: Development of a versatile high-throughput mutagenesis assay with multiplexed short-read NGS using DNA-barcoded supF shuttle vector library amplified in E. coli
Source: eLife journal article supplement (doi:10.7554/elife.83780), 2022-10-10
Supplement: supp [file elife-83780-supp-v1.zip]

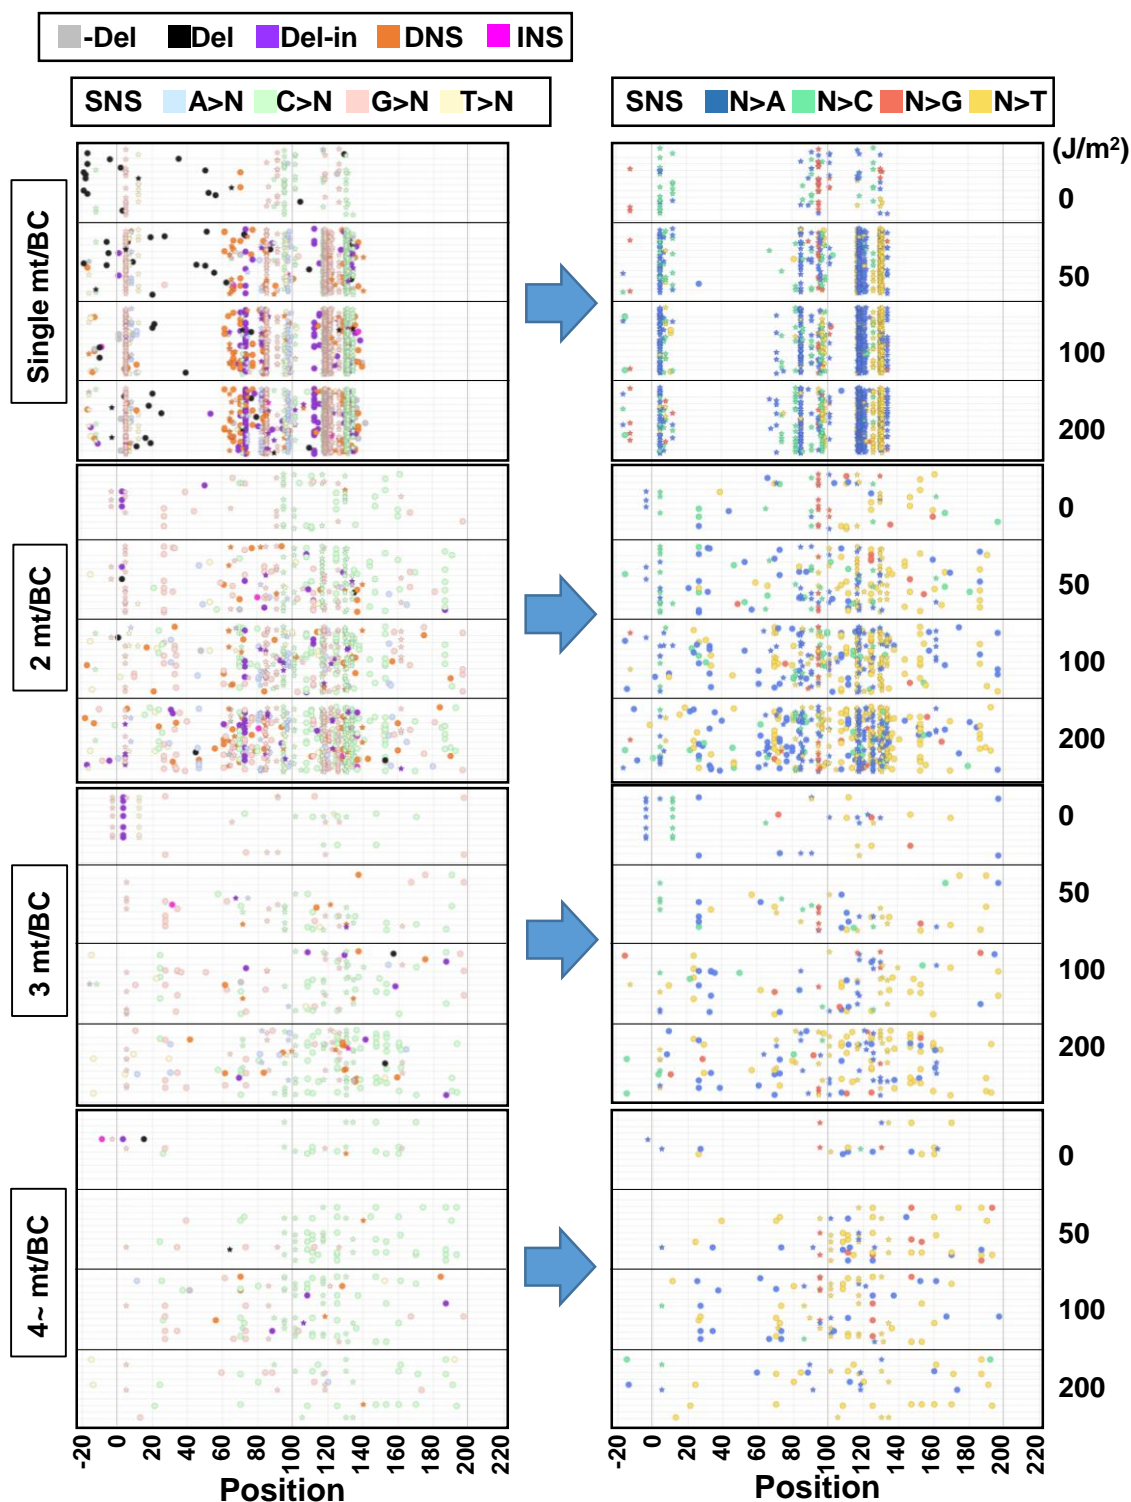

**Figure 12-figure supplement 1. The position and mutation type of each identified mutation (data from selection plates, 0-200 J/m²)**

The position and mutation type of each identified mutation are presented in dot plots for the cases of 1, 2, 3, or 4~ mutations per BC. The star symbols indicate the positions of mutations associated with mutant phenotype of the *supF* gene. Each type of mutation is indicated by a different color in the left-side plots (legend on top). The bases after the substitution are indicated by a different color for only SNSs in the right-side plots (legend on top). The mutations in identical BCs are plotted on the same horizontal line. Data is combined from Lib10<sup>4</sup>\_#1 and Lib10<sup>4</sup>\_#2.
