# Supplementary material for: Development of a versatile high-throughput mutagenesis assay with multiplexed short-read NGS using DNA-barcoded supF shuttle vector library amplified in E. coli
Source: eLife journal article supplement (doi:10.7554/elife.83780), 2022-10-10
Supplement: supp [file elife-83780-supp-v1.zip]

Archive with 19 entries (19 files):
- elife_poa_e83780_Figure_1_figure_supplement_1.pdf
- elife_poa_e83780_Figure_1_figure_supplement_2.pdf
- elife_poa_e83780_Figure_2_figure_supplement_1.pdf
- elife_poa_e83780_Figure_4_figure_supplement_1.pdf
- elife_poa_e83780_Figure_6_figure_supplement_1.pdf
- elife_poa_e83780_Figure_8_figure_supplement_1.pdf
- elife_poa_e83780_Figure_10_figure_supplement_1.pdf
- elife_poa_e83780_Figure_12_figure_supplement_1.pdf
- elife_poa_e83780_Figure_12_figure_supplement_2.pdf
- elife_poa_e83780_Figure_13_figure_supplement_1.pdf
- elife_poa_e83780_Figure_13_figure_supplement_2.pdf
- elife_poa_e83780_Figure_13_figure_supplement_3.pdf
- elife_poa_e83780_Supplementary_file_1.xlsx
- elife_poa_e83780_Supplementary_file_2.xlsx
- elife_poa_e83780_Supplementary_file_3.xlsx
- elife_poa_e83780_Supplementary_file_4.xlsx
- elife_poa_e83780_Supplementary_file_5.xlsx
- elife_poa_e83780_Supplementary_file_6.xlsx
- elife_poa_e83780_Supplementary_file_7.xlsx
