# Supplementary material for: Development of a versatile high-throughput mutagenesis assay with multiplexed short-read NGS using DNA-barcoded supF shuttle vector library amplified in E. coli
Source: eLife journal article supplement (doi:10.7554/elife.83780), 2022-10-10
Supplement: supp [file elife-83780-supp-v1.zip › elife_poa_e83780_Figure_1_figure_supplement_1.pdf]

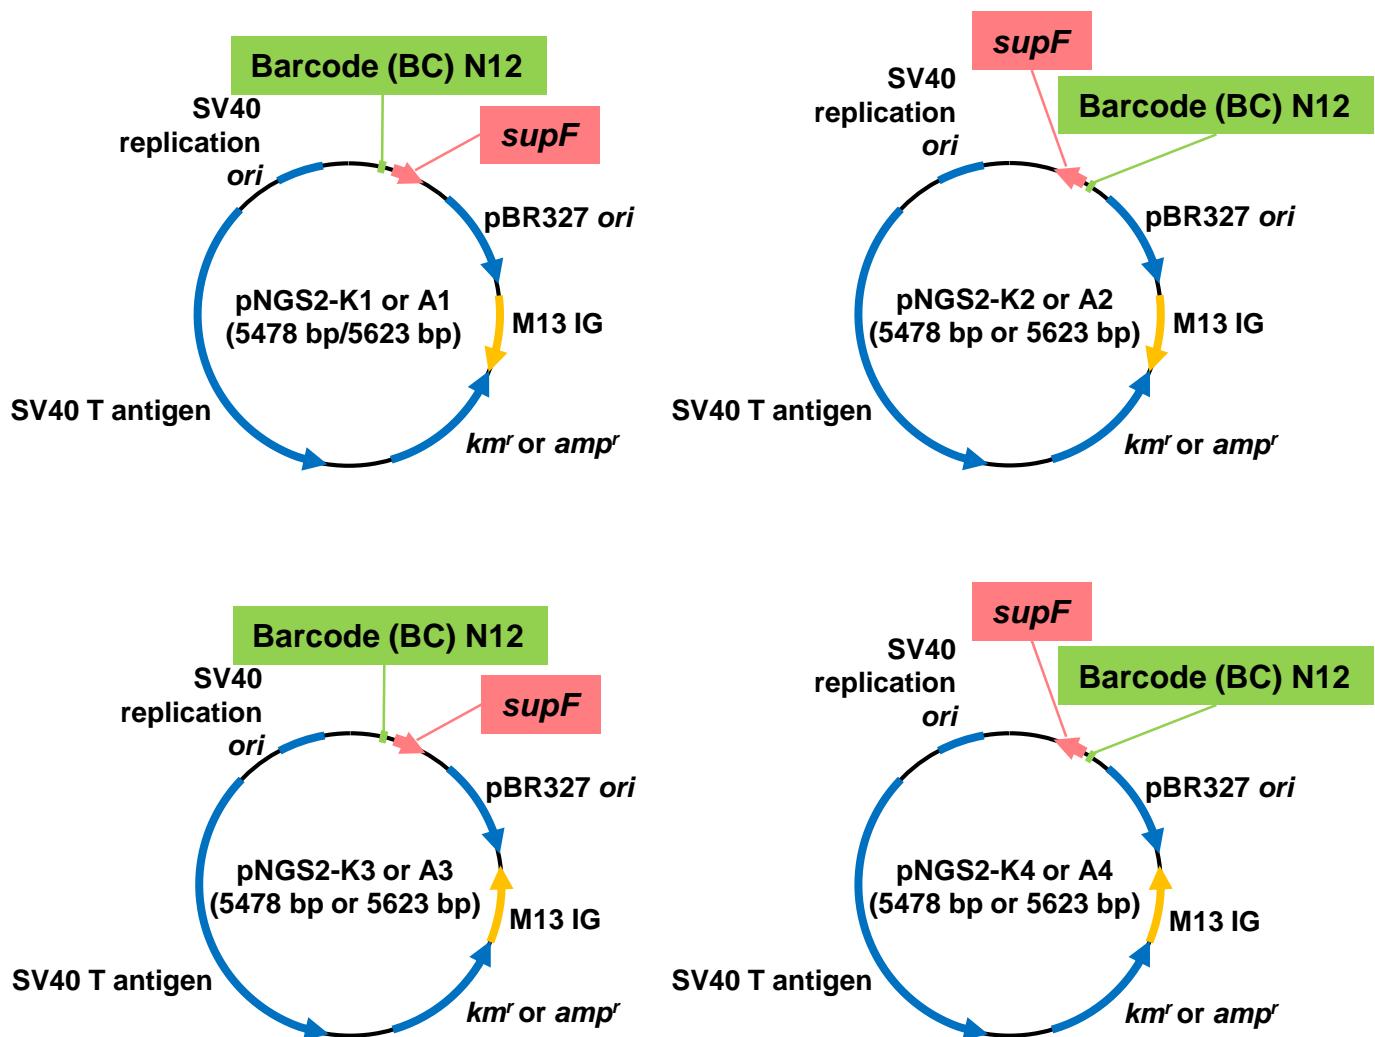

**Figure 1-figure supplement 1. *SupF* shuttle vector N<sub>12</sub>-BC library**

The circular maps of eight series of *supF* shuttle vector plasmids, pNGS2 -K1, -K2, -K3, -K4, -A1, -A2, -A3, -A4. Each plasmid vector contains an amber suppressor tRNA gene (*supF*), a TP53-/Rb- binding-deficient mutant SV40 large T antigen (E107K/D402E) with a SV40 replication origin, a pBR327 origin of replication, a M13 intergenic region, and either an ampicillin-resistance gene (*amp<sup>r</sup>*) or kanamycin-resistance gene (*km<sup>r</sup>*) in the indicated direction.
