# Supplementary material for: Development of a versatile high-throughput mutagenesis assay with multiplexed short-read NGS using DNA-barcoded supF shuttle vector library amplified in E. coli
Source: eLife journal article supplement (doi:10.7554/elife.83780), 2022-10-10
Supplement: supp [file elife-83780-supp-v1.zip › elife_poa_e83780_Figure_1_figure_supplement_2.pdf]

| Primer Name<br>(Forward N <sub>0</sub> ) | Sequence (5' to 3')                       | Primer Name<br>(Forward N <sub>2</sub> ) | Sequence (5' to 3')                        |
|------------------------------------------|-------------------------------------------|------------------------------------------|--------------------------------------------|
| BC12-ID01-F                              | ATGCA <b>AATTA</b> ATTGTAAAGGCCTCAGCGAATT | BC12-ID49-NN-F                           | NNATGC <b>ATGATG</b> TTGTAAAGGCCTCAGCGAATT |
| BC12-ID02-F                              | ATGCA <b>AAGGA</b> ATTGTAAAGGCCTCAGCGAATT | BC12-ID50-NN-F                           | NNATGC <b>AGTAGT</b> TTGTAAAGGCCTCAGCGAATT |
| BC12-ID03-F                              | ATGCA <b>AACCA</b> ATTGTAAAGGCCTCAGCGAATT | BC12-ID51-NN-F                           | NNATGC <b>TAGTAG</b> TTGTAAAGGCCTCAGCGAATT |
| BC12-ID04-F                              | ATGCT <b>TAAAT</b> TTTGTAAAGGCCTCAGCGAATT | BC12-ID52-NN-F                           | NNATGC <b>TGATGA</b> TTGTAAAGGCCTCAGCGAATT |
| BC12-ID05-F                              | ATGCT <b>TTGGT</b> TTTGTAAAGGCCTCAGCGAATT | BC12-ID53-NN-F                           | NNATGC <b>GATGAT</b> TTGTAAAGGCCTCAGCGAATT |
| BC12-ID06-F                              | ATGCT <b>TTCC</b> TTTGTAAAGGCCTCAGCGAATT  | BC12-ID54-NN-F                           | NNATGC <b>GTAGTA</b> TTGTAAAGGCCTCAGCGAATT |
| BC12-ID07-F                              | ATGCG <b>GGAAGG</b> TTGTAAAGGCCTCAGCGAATT | BC12-ID55-NN-F                           | NNATGC <b>ATCATC</b> TTGTAAAGGCCTCAGCGAATT |
| BC12-ID08-F                              | ATGCG <b>GTTGG</b> TTGTAAAGGCCTCAGCGAATT  | BC12-ID56-NN-F                           | NNATGC <b>ACTACT</b> TTGTAAAGGCCTCAGCGAATT |
| BC12-ID09-F                              | ATGCG <b>GGCCGG</b> TTGTAAAGGCCTCAGCGAATT | BC12-ID57-NN-F                           | NNATGC <b>TACTAC</b> TTGTAAAGGCCTCAGCGAATT |
| BC12-ID10-F                              | ATGCC <b>CAAC</b> CTTGTAAAGGCCTCAGCGAATT  | BC12-ID58-NN-F                           | NNATGC <b>TCATCA</b> TTGTAAAGGCCTCAGCGAATT |
| BC12-ID11-F                              | ATGCC <b>CTTCC</b> TTGTAAAGGCCTCAGCGAATT  | BC12-ID59-NN-F                           | NNATGC <b>CTATCA</b> TTGTAAAGGCCTCAGCGAATT |
| BC12-ID12-F                              | ATGCC <b>CCGGCC</b> TTGTAAAGGCCTCAGCGAATT | BC12-ID60-NN-F                           | NNATGC <b>CTACTA</b> TTGTAAAGGCCTCAGCGAATT |
| BC12-ID13-F                              | ATGCA <b>AATTGG</b> TTGTAAAGGCCTCAGCGAATT | BC12-ID61-NN-F                           | NNATGC <b>AGCAGC</b> TTGTAAAGGCCTCAGCGAATT |
| BC12-ID14-F                              | ATGCA <b>AAGGT</b> TTGTAAAGGCCTCAGCGAATT  | BC12-ID62-NN-F                           | NNATGC <b>ACGACG</b> TTGTAAAGGCCTCAGCGAATT |
| BC12-ID15-F                              | ATGCT <b>TAAAG</b> TTGTAAAGGCCTCAGCGAATT  | BC12-ID63-NN-F                           | NNATGC <b>GACGAC</b> TTGTAAAGGCCTCAGCGAATT |
| BC12-ID16-F                              | ATGCT <b>TTGGA</b> TTGTAAAGGCCTCAGCGAATT  | BC12-ID64-NN-F                           | NNATGC <b>GCAGCA</b> TTGTAAAGGCCTCAGCGAATT |
| BC12-ID17-F                              | ATGCG <b>GGAAT</b> TTGTAAAGGCCTCAGCGAATT  | BC12-ID65-NN-F                           | NNATGC <b>CAGCAG</b> TTGTAAAGGCCTCAGCGAATT |
| BC12-ID18-F                              | ATGCG <b>GTTAA</b> TTGTAAAGGCCTCAGCGAATT  | BC12-ID66-NN-F                           | NNATGC <b>CGACGA</b> TTGTAAAGGCCTCAGCGAATT |
| BC12-ID19-F                              | ATGCA <b>AATCC</b> TTGTAAAGGCCTCAGCGAATT  | BC12-ID67-NN-F                           | NNATGC <b>TGCTGC</b> TTGTAAAGGCCTCAGCGAATT |
| BC12-ID20-F                              | ATGCA <b>AACCT</b> TTGTAAAGGCCTCAGCGAATT  | BC12-ID68-NN-F                           | NNATGC <b>TCGTCG</b> TTGTAAAGGCCTCAGCGAATT |
| BC12-ID21-F                              | ATGCT <b>TAAAC</b> TTGTAAAGGCCTCAGCGAATT  | BC12-ID69-NN-F                           | NNATGC <b>GTCTCT</b> TTGTAAAGGCCTCAGCGAATT |
| BC12-ID22-F                              | ATGCT <b>TTCCA</b> TTGTAAAGGCCTCAGCGAATT  | BC12-ID70-NN-F                           | NNATGC <b>GCTGCT</b> TTGTAAAGGCCTCAGCGAATT |
| BC12-ID23-F                              | ATGCC <b>CAAT</b> TTTGTAAAGGCCTCAGCGAATT  | BC12-ID71-NN-F                           | NNATGC <b>CTGCTG</b> TTGTAAAGGCCTCAGCGAATT |
| BC12-ID24-F                              | ATGCC <b>CCTTA</b> TTGTAAAGGCCTCAGCGAATT  | BC12-ID72-NN-F                           | NNATGC <b>CGTCGT</b> TTGTAAAGGCCTCAGCGAATT |

  

| Primer Name<br>(Forward N <sub>1</sub> ) | Sequence (5' to 3')                        | Primer Name<br>(Reverse N <sub>0-2</sub> ) | Sequence (5' to 3')      |
|------------------------------------------|--------------------------------------------|--------------------------------------------|--------------------------|
| BC12-ID25-N-F                            | NATGC <b>AAGGCC</b> TTGTAAAGGCCTCAGCGAATT  | BC12-N <sub>0</sub> -R                     | CTAACCAAGTTCCTCTTTTCAG   |
| BC12-ID26-N-F                            | NATGC <b>AACCGG</b> TTGTAAAGGCCTCAGCGAATT  | BC12-N <sub>1</sub> -R                     | NCTAACCAAGTTCCTCTTTTCAG  |
| BC12-ID27-N-F                            | NATGC <b>GGAACC</b> TTGTAAAGGCCTCAGCGAATT  | BC12-N <sub>2</sub> -R                     | NNCTAACCAAGTTCCTCTTTTCAG |
| BC12-ID28-N-F                            | NATGC <b>GGCCAA</b> TTGTAAAGGCCTCAGCGAATT  |                                            |                          |
| BC12-ID29-N-F                            | NATGC <b>CCAAGG</b> TTGTAAAGGCCTCAGCGAATT  |                                            |                          |
| BC12-ID30-N-F                            | NATGC <b>CCGGA</b> TTGTAAAGGCCTCAGCGAATT   |                                            |                          |
| BC12-ID31-N-F                            | NATGCT <b>TTGGCC</b> TTGTAAAGGCCTCAGCGAATT |                                            |                          |
| BC12-ID32-N-F                            | NATGCT <b>TTCCGG</b> TTGTAAAGGCCTCAGCGAATT |                                            |                          |
| BC12-ID33-N-F                            | NATGCG <b>GTTCC</b> TTGTAAAGGCCTCAGCGAATT  |                                            |                          |
| BC12-ID34-N-F                            | NATGCG <b>GCCTT</b> TTGTAAAGGCCTCAGCGAATT  |                                            |                          |
| BC12-ID35-N-F                            | NATGCC <b>CTTGG</b> TTGTAAAGGCCTCAGCGAATT  |                                            |                          |
| BC12-ID36-N-F                            | NATGCC <b>CGGT</b> TTGTAAAGGCCTCAGCGAATT   |                                            |                          |
| BC12-ID37-N-F                            | NATGC <b>ATAATA</b> TTGTAAAGGCCTCAGCGAATT  |                                            |                          |
| BC12-ID38-N-F                            | NATGC <b>AGAAGA</b> TTGTAAAGGCCTCAGCGAATT  |                                            |                          |
| BC12-ID39-N-F                            | NATGC <b>ACAACA</b> TTGTAAAGGCCTCAGCGAATT  |                                            |                          |
| BC12-ID40-N-F                            | NATGCT <b>TATTAT</b> TTGTAAAGGCCTCAGCGAATT |                                            |                          |
| BC12-ID41-N-F                            | NATGCT <b>GTTGT</b> TTGTAAAGGCCTCAGCGAATT  |                                            |                          |
| BC12-ID42-N-F                            | NATGCT <b>CTTCT</b> TTGTAAAGGCCTCAGCGAATT  |                                            |                          |
| BC12-ID43-N-F                            | NATGCG <b>AGGAG</b> TTGTAAAGGCCTCAGCGAATT  |                                            |                          |
| BC12-ID44-N-F                            | NATGCG <b>TGGTG</b> TTGTAAAGGCCTCAGCGAATT  |                                            |                          |
| BC12-ID45-N-F                            | NATGCG <b>CGGCG</b> TTGTAAAGGCCTCAGCGAATT  |                                            |                          |
| BC12-ID46-N-F                            | NATGCC <b>ACCAC</b> TTGTAAAGGCCTCAGCGAATT  |                                            |                          |
| BC12-ID47-N-F                            | NATGCT <b>CTCTC</b> TTGTAAAGGCCTCAGCGAATT  |                                            |                          |
| BC12-ID48-N-F                            | NATGCC <b>CGCCG</b> TTGTAAAGGCCTCAGCGAATT  |                                            |                          |

**Figure 1-figure supplement 2. The nucleotide sequences of primer sets for multiplexing sample preparation for NGS**

The each N<sub>12</sub>-BC library was independently amplified by PCR with a forward primer (BC12-IDXX-N<sub>x</sub>-F) and a reverse primer (BC12-N<sub>x</sub>-R). Pre-designed 6-nucleotide sequence (N6) were shown in red color.
