# Supplementary material for: Development of a versatile high-throughput mutagenesis assay with multiplexed short-read NGS using DNA-barcoded supF shuttle vector library amplified in E. coli
Source: eLife journal article supplement (doi:10.7554/elife.83780), 2022-10-10
Supplement: supp [file elife-83780-supp-v1.zip › elife_poa_e83780_Figure_2_figure_supplement_1.pdf]

**A)**

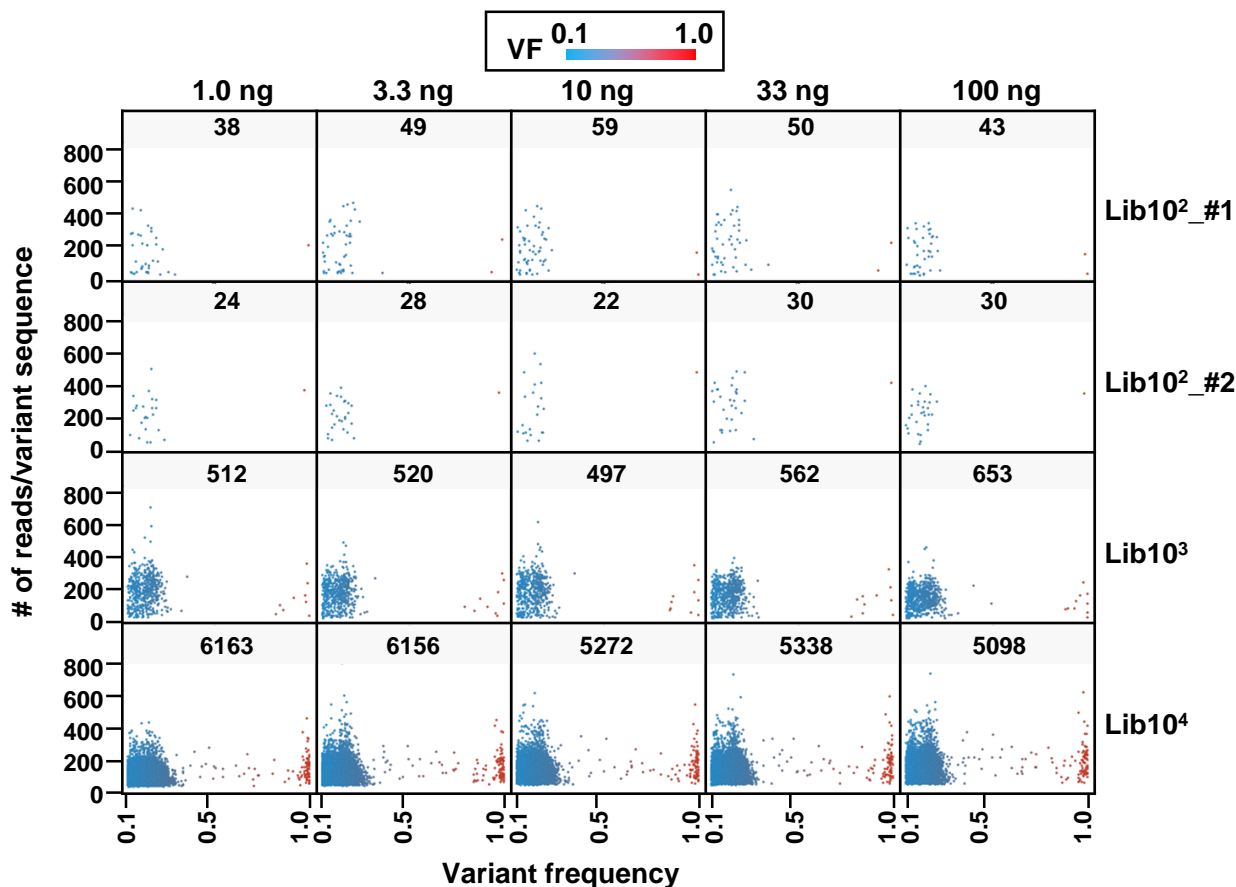

**B)**

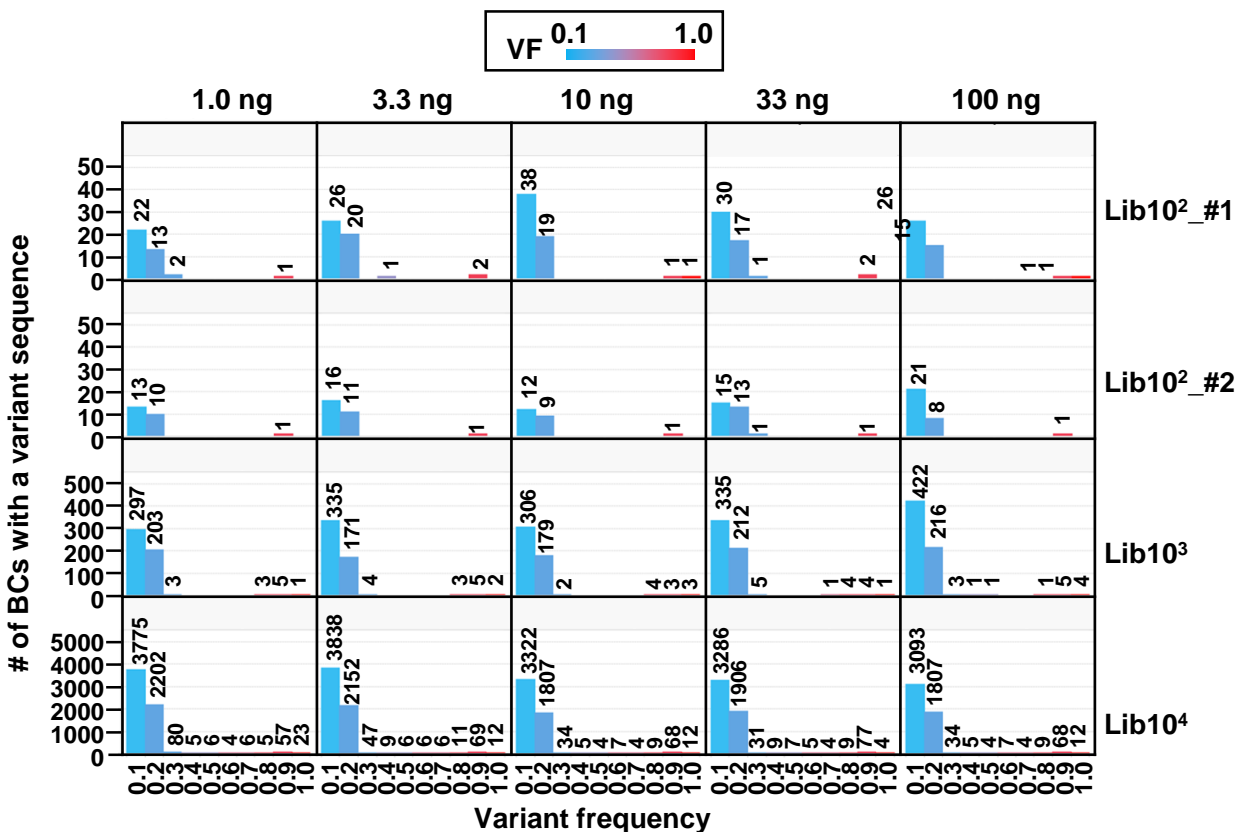

**Figure 2-figure supplement 1. Variant frequency in N<sub>12</sub>-BC sequences from the multiplexed NGS libraries** (A) Dot plots of the distribution of the number of reads for each variant sequence according to their variant frequency for the samples in Fig. 2. The number in each segment represents the total number of N<sub>12</sub>-BC sequences with a variant sequence. Source data is available in Supplementary Table S2. (B) Distribution of the number of N<sub>12</sub>-BC sequences with a variant by variant frequency, shown as histograms with bin width 0.1 of the VF.
