# Supplementary material for: Development of a versatile high-throughput mutagenesis assay with multiplexed short-read NGS using DNA-barcoded supF shuttle vector library amplified in E. coli
Source: eLife journal article supplement (doi:10.7554/elife.83780), 2022-10-10
Supplement: supp [file elife-83780-supp-v1.zip › elife_poa_e83780_Figure_4_figure_supplement_1.pdf]

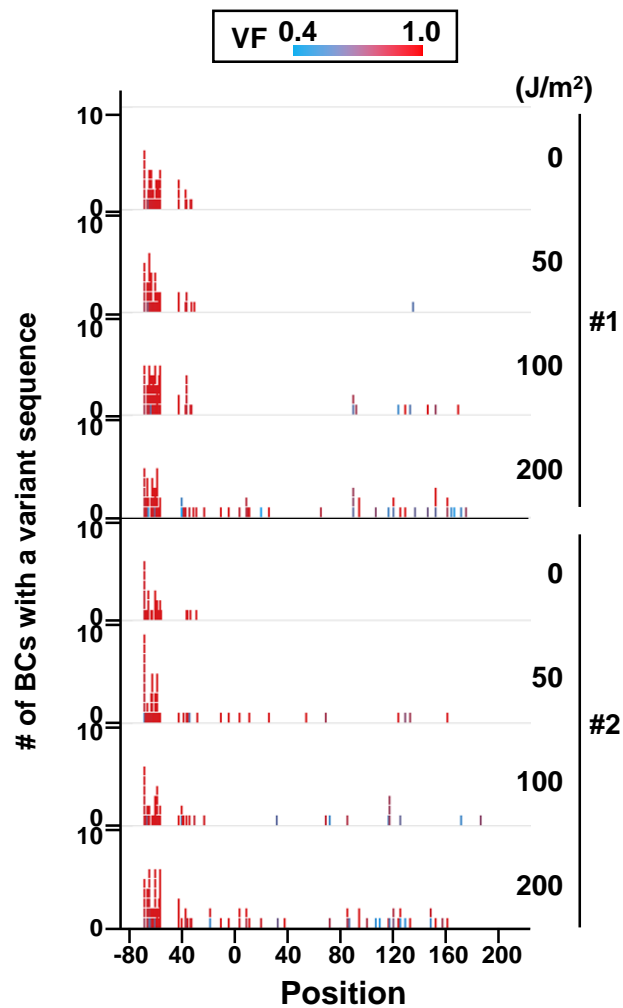

**Figure 4-figure supplement 1. Number of  $N_{12}$ -BC sequences with a variant exceeding VF 0.4 at different UV-C doses and their distribution by nucleotide position (in bacterial cells, data from titer plates).**  
The colors reflect the variant frequency as indicated by the heatmap on top.
