# Supplementary material for: Development of a versatile high-throughput mutagenesis assay with multiplexed short-read NGS using DNA-barcoded supF shuttle vector library amplified in E. coli
Source: eLife journal article supplement (doi:10.7554/elife.83780), 2022-10-10
Supplement: supp [file elife-83780-supp-v1.zip › elife_poa_e83780_Figure_12_figure_supplement_2.pdf]

1-Del Del Del-in DNS INS

A>C C>A G>A T>A  
A>G C>G G>C T>C  
A>T C>T G>T T>G

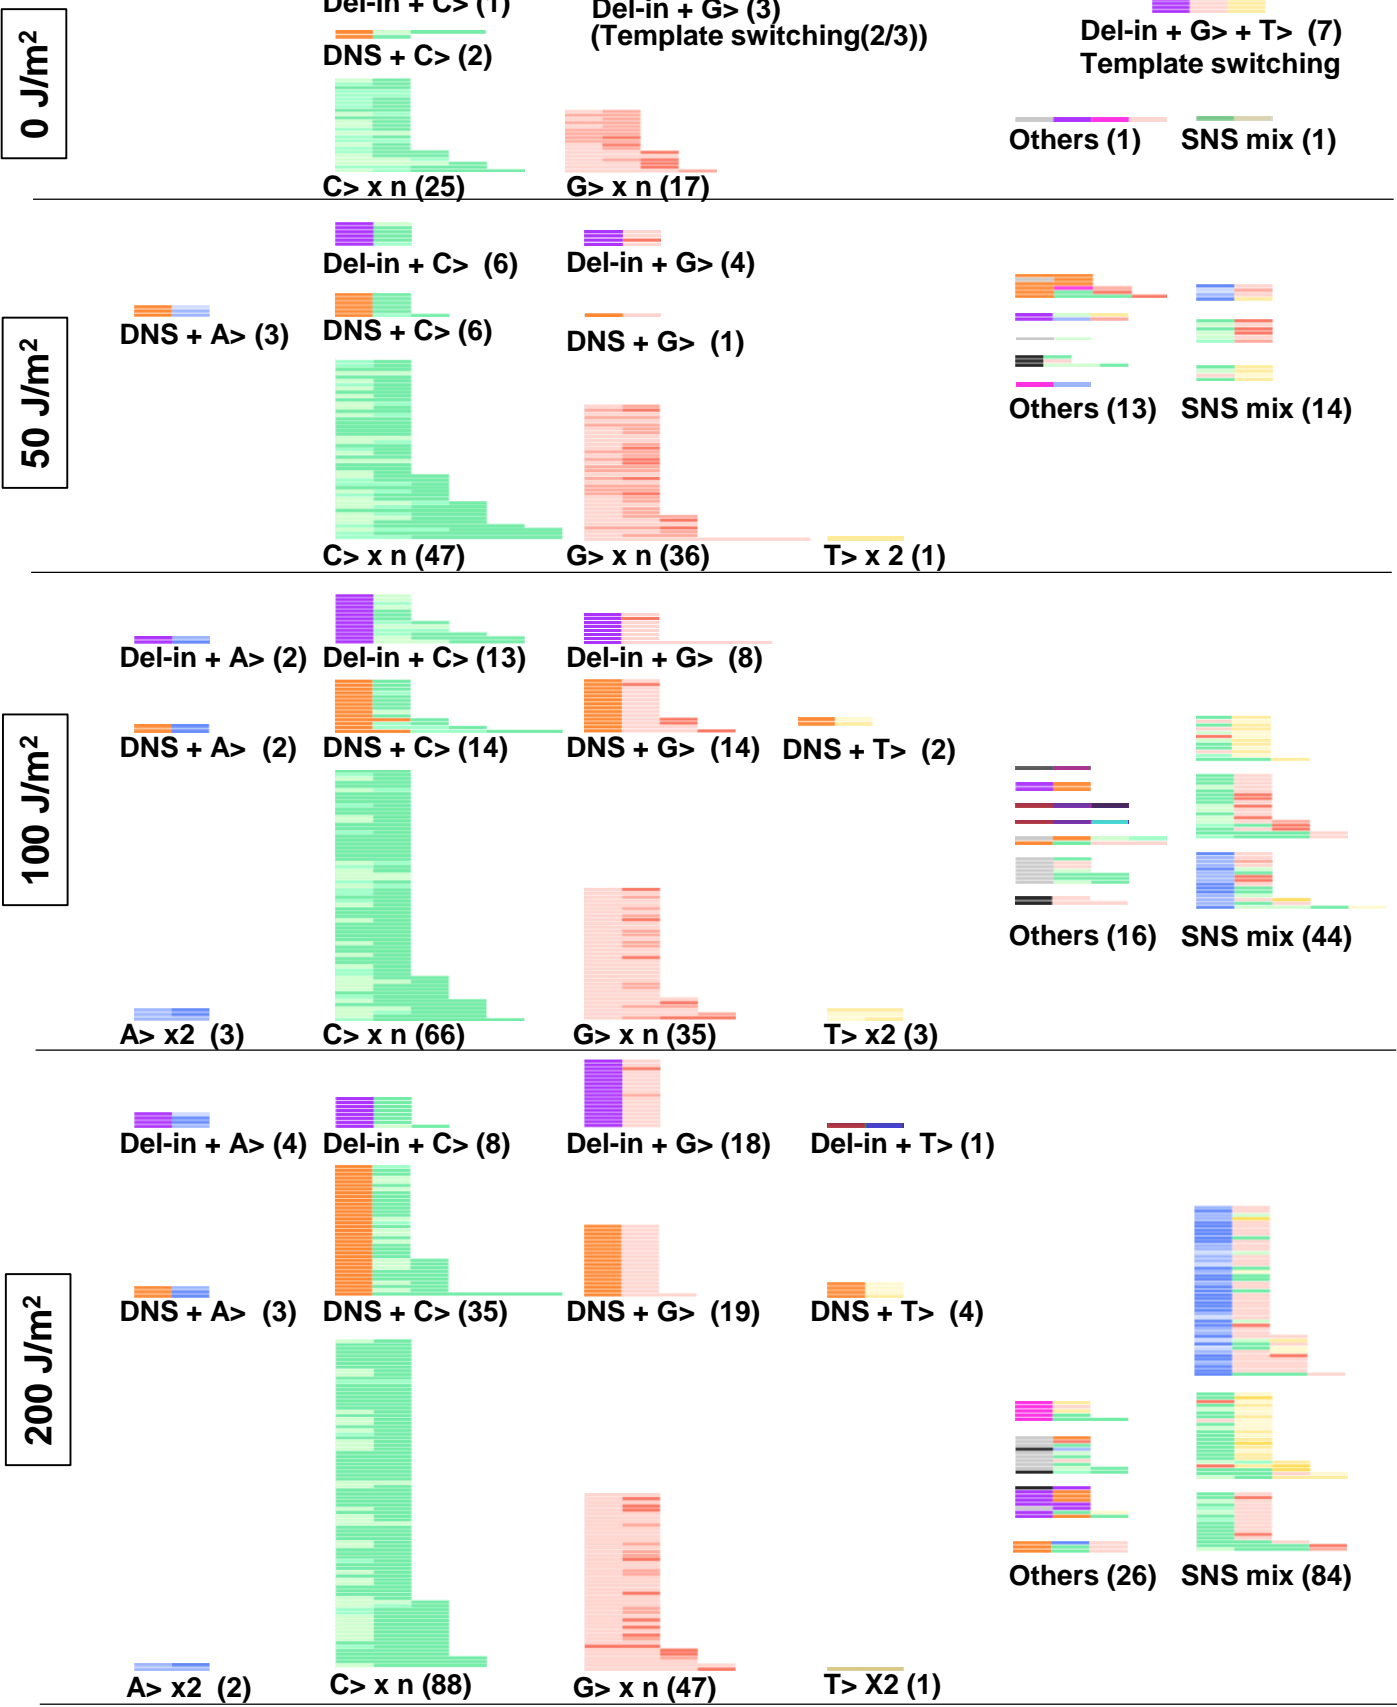

**Figure 12-figure supplement 2. The combinations of UV-induced mutation types in the *supF* gene in mammalian cells (data from selection plates, 0-200 J/m<sup>2</sup>)**  
 Combinations of mutation sequences for each BC with multiple mutations for each UV-dose. Combinations of more than one mutation per BC are shown. Each type of mutation is indicated by a different color and the type of aberration. The number in brackets and the height of stacked horizontal bars represent the number of BCs with the mutation(s).
