# Supplementary material for: Development of a versatile high-throughput mutagenesis assay with multiplexed short-read NGS using DNA-barcoded supF shuttle vector library amplified in E. coli
Source: eLife journal article supplement (doi:10.7554/elife.83780), 2022-10-10
Supplement: supp [file elife-83780-supp-v1.zip › elife_poa_e83780_Figure_13_figure_supplement_2.pdf]

The position and type of each identified mutation per BC are presented in bar graphs for the cases of 2 (left-side graph) or 3~ (right-side graph) mutations per BC (233 bp, positions -19 to 214). Each single base substitution is indicated by a different color (legend on top). Data is combined from Lib10<sup>4</sup> #1 and Lib10<sup>4</sup> #2.
