# Supplementary material for: Development of a versatile high-throughput mutagenesis assay with multiplexed short-read NGS using DNA-barcoded supF shuttle vector library amplified in E. coli
Source: eLife journal article supplement (doi:10.7554/elife.83780), 2022-10-10
Supplement: supp [file elife-83780-supp-v1.zip › elife_poa_e83780_Figure_13_figure_supplement_3.pdf]

### Theoretical distance between 2 SNSs

### Actual distance between 2 SNSs (selection plates, 50, 100, and 200 J/m<sup>2</sup>)

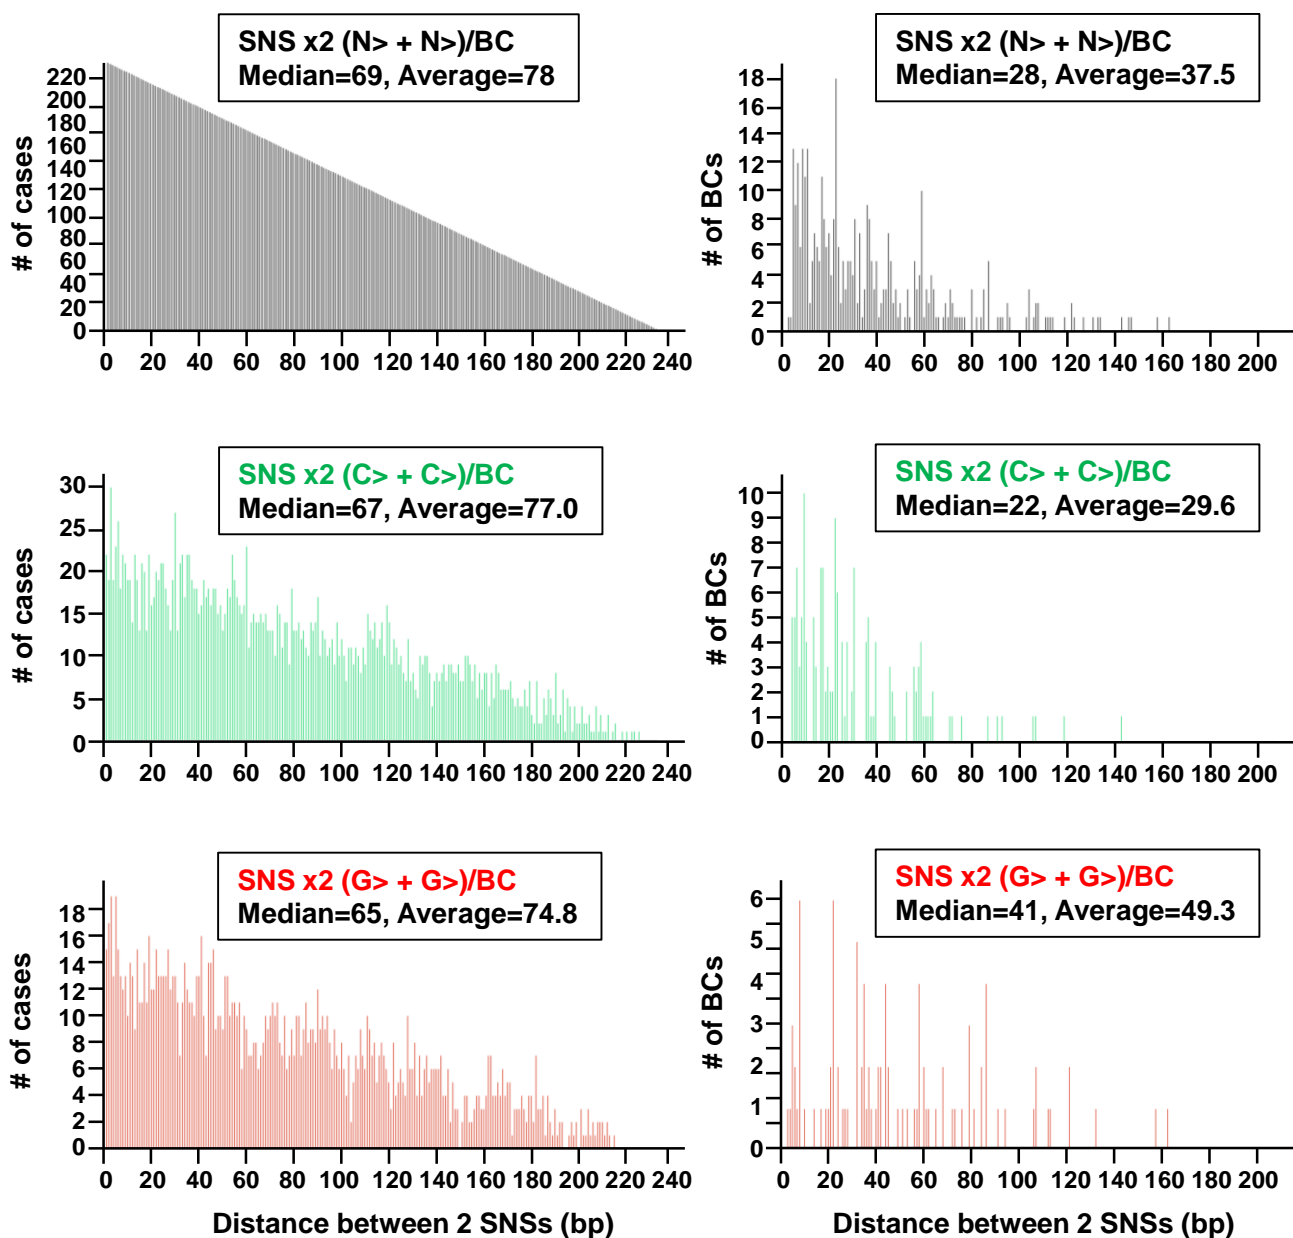

**Figure 13-figure supplements 3. The distribution of the distance between 2 SNSs per BC (data from selection plates, 50, 100, and 200 J/m<sup>2</sup>)**

The theoretical distances (bp) between 2 bases based on the sequence (233 bp, positions -19 to 214) are shown in the left-side histograms for all four bases (top), for two cytosines (middle), and for two guanines (bottom). The actual distances between 2 SNSs induced by UV per BC are shown on the right side. Data is combined from Lib10<sup>4</sup>\_#1 and Lib10<sup>4</sup>\_#2. The median and average distance are shown on the top of each histogram.
