# Supplementary material for: Development of a versatile high-throughput mutagenesis assay with multiplexed short-read NGS using DNA-barcoded supF shuttle vector library amplified in E. coli
Source: eLife journal article supplement (doi:10.7554/elife.83780), 2022-10-10
Supplement: supp [file elife-83780-supp-v1.zip › elife_poa_e83780_Supplementary_file_1.xlsx]

## Sheet: 1A
Sample name	BC	BC(-)	BC#	BC(-)#
Lib10^2_#1 1 ng	AAATGTCTCGCG		17
Lib10^2_#1 1 ng	AACGCGGGTATC	AACGCGCGTATC,AACGCGGGTAGC,AACGCGGGTGTC,AACGCGGGTNTC,AACGCGNGTATC,AACGGGGGTATC	454	2,1,1,1,2,1
Lib10^2_#1 1 ng	AAGGGCTTCGAC	AAGGGCTTCCAC,AAGGGCTTCGAG,AAGGGCTTCGCC,AAGGGCTTCGGC,AAGGGCTTCGTC,AAGGGCTTCNAC,AGGGGCTTCGAC	344	2,1,2,3,7,1,1
Lib10^2_#1 1 ng	AATTTCTCTGAT	AATTTATCTGAT,AATTTCGCTGAT,AATTTCTCTGAG,AATTTCTCTGCT,AATTTCTCTGGT,AATTTCTCTGTT	265	1,1,1,1,4,1
Lib10^2_#1 1 ng	ACCCATGTGAGG	ACCCATGTGGGG,ACCCATGTGTGG	26	1,1
Lib10^2_#1 1 ng	ACCGGAATCAAG	ACCGGAATCACG,ACCGGAATCAGG,ACCGGAATCATG,ACCGGACTCAAG,ACCGGTATCAAG	286	1,1,3,1,5
Lib10^2_#1 1 ng	ACTGGTGAGGAT	ACTGGGGAGGAT,ACTGGTGAAGAT,ACTGGTGAGGGT,ACTGGTGTGGAT	275	2,1,2,1
Lib10^2_#1 1 ng	ACTTACTATGTT	ACTTACTATGTC	103	1
Lib10^2_#1 1 ng	ACTTAGCCGCAC	ACTTAGCCGCAG,ACTTAGNCGCAC	139	1,1
Lib10^2_#1 1 ng	AGCAATGGGGAT		27
Lib10^2_#1 1 ng	AGCTTGTTTATC	ACCTTGTTTATC,AGCTTGATTATC,AGCTTGCTTATC,AGCTTGGTTATC,AGCTTGTTTAAC,AGCTTGTTTATG	242	1,1,1,3,1,1
Lib10^2_#1 1 ng	AGGCTGGGGGTA	AGGCTGGGCGTA,AGGCTGGGGGAA,AGGCTGGGGGTT,AGGCTGGTGGTA,TGGCTGGGGGTA	260	1,1,1,1,1
Lib10^2_#1 1 ng	AGGGTCCGCGTC	AGGGTCCGCGAC,GGGGTCCGCGTC	37	1,1
Lib10^2_#1 1 ng	AGTCAACTAGCC		60
Lib10^2_#1 1 ng	AGTCGGGACGGA	AGACGGGACGGA,AGTCCGGACGGA,AGTCGGCACGGA,AGTCGGGACGGC,AGTCGGGACGGG,AGTCGGGACGGT,AGTCGGGGCGGA,AGTCGGGTCGGA	392	1,1,1,1,2,1,1,2
Lib10^2_#1 1 ng	AGTCTCTCGTGA	AGTATCTCGTGA,AGTCTCTCGAGA,AGTCTCTCGCGA,AGTCTCTCGTGT,AGTTTCTCGTGA	230	1,2,1,2,1
Lib10^2_#1 1 ng	AGTGCATGGGGA	AGTCCATGGGGA,AGTGCATGAGGA,AGTGCATGGGGT	114	1,1,1
Lib10^2_#1 1 ng	ATCAAATGCTTT	ACCAAATGCTTT,AGCAAATGCTTT,ATCAAANGCTTT,ATCAAATGCTGT,ATCAAGTGCTTT,ATCACATGCTTT,ATCAGATGCTTT	383	1,1,1,1,1,1,2
Lib10^2_#1 1 ng	ATCAATGGGTGG	AACAATGGGTGG,ATCAANGGGTGG,ATCAATGAGTGG,ATCAATGGGAGG,ATCAATGGGGGG,ATCTATGGGTGG	206	2,1,1,1,5,1
Lib10^2_#1 1 ng	ATCGGTGAACCA	ATCGGGGAACCA,ATCGGTGAGCCA,ATCGGTGATCCA,ATCGGTGGACCA,ATCGGTGTACCA	258	2,1,1,5,9
Lib10^2_#1 1 ng	ATGGGGAAGCAT	ATCGGGAAGCAT,ATGGGGAAGCTT,ATGGGGAGGCAT,ATGGGGATGCAT,ATGGGGCAGCAT,ATGGGGGAGCAT,ATGGGGTAGCAT,ATGGGTAAGCAT,ATGTGGAAGCAT	347	1,1,1,1,2,5,1,1,1
Lib10^2_#1 1 ng	ATTCGGGTTGTT	AATCGGGTTGTT,ATTCGGGATGTT,ATTCGGGNTGTT,ATTCGGGTTCTT,ATTCGGGTTGAT,ATTCGGGTTGGT,ATTCGGGTTGTG,ATTCGTGTTGTT	210	1,1,1,1,1,1,1,2
Lib10^2_#1 1 ng	ATTCGTTTTAGA	ATTCGATTTAGA,ATTCGTTTTAGG,ATTCGTTTTAGT,ATTGGTTTTAGA,ATTNGTTTTAGA	218	1,2,1,1,1
Lib10^2_#1 1 ng	ATTGATCTGATT	AGTGATCTGATT,ATAGATCTGATT,ATTCATCTGATT,ATTGATCTGAGT,ATTGATNTGATT,ATTGGTCTGATT	159	1,1,1,1,1,2
Lib10^2_#1 1 ng	CAAGAGGTGATC	CAAGAGGAGATC,CAAGAGGCGATC,CAAGAGGGGATC,CAAGAGGTGGTC,CAAGGGGTGATC,CTAGAGGTGATC,GAAGAGGTGATC	213	1,1,1,1,1,1,1
Lib10^2_#1 1 ng	CAGGCAATAAGG	CAGGCAAAAAGG,CAGGCAACAAGG,CAGGCAATAGGG,CAGGCACTAAGG,CTGGCAATAAGG,TAGGCAATAAGG	219	1,1,2,1,1,1
Lib10^2_#1 1 ng	CAGGTGTTTGCC	CAGATGTTTGCC,CAGCTGTTTGCC,CAGGAGTTTGCC,CAGGGGTTTGCC,CAGGTGTATGCC,CAGGTGTGTGCC,CAGGTGTNTGCC,CAGGTGTTTACC,CAGNTGTTTGCC	348	1,1,2,1,3,1,1,1,1
Lib10^2_#1 1 ng	CAGTGTTTAACC	CACTGTTTAACC,CAGTGTGTAACC,CAGTGTNTAACC	44	1,2,1
Lib10^2_#1 1 ng	CATCTGCCGATT	CACCTGCCGATT,CATCTACCGATT,CATCTGCCGACT,CATCTGCCGATA,CATCTGCCGGTT,CATCTGCCGTTT,CCTCTGCCGATT,CTTCTGCCGATT	300	1,1,1,1,1,1,1,1
Lib10^2_#1 1 ng	CCGGTCTTTTAC	CCGGGCTTTTAC,CCGGTCATTTAC,CCGGTCTTCTAC,CCGNTCTTTTAC	348	1,1,2,1
Lib10^2_#1 1 ng	CCGGTTATTAGC	ACGGTTATTAGC,CCGGGTATTAGC,CCGGTAATTAGC,CCGGTTATTTGC	196	1,1,1,1
Lib10^2_#1 1 ng	CCGTAACGTTTT	CCGAAACGTTTT,CCGCAACGTTTT,CCGTAACGTCTT,CCGTAACGTTAT,CCGTAACGTTCT,CCGTANCGTTTT,CCGTCACGTTTT,CCGTTACGTTTT,CTGTAACGTTTT	208	1,1,1,1,1,2,1,1,1
Lib10^2_#1 1 ng	CCTATTCGTTGT		63
Lib10^2_#1 1 ng	CCTGTATCACAA	CCTGTATCAGAA,CGTGTATCACAA	173	1,1
Lib10^2_#1 1 ng	CGCCGACATATA		37
Lib10^2_#1 1 ng	CGCCGGCCGGTT	CGCCGGCCGGGT	64	1
Lib10^2_#1 1 ng	CGTTTGTTGTTA	CGGTTGTTGTTA,CGTATGTTGTTA,CGTCTGTTGTTA,CGTGTGTTGTTA,CGTTTGTAGTTA	214	2,5,4,4,1
Lib10^2_#1 1 ng	CGTTTTTTTCGT	CATTTTTTTCGT,CGTATTTTTCGT,CGTCTTTTTCGT,CGTGTTTTTCGT,CGTTTNTTTCGT,CGTTTTTTACGT,CGTTTTTTTCTT,GGTTTTTTTCGT	222	1,6,7,4,1,1,1,1
Lib10^2_#1 1 ng	CTAGGAGATGAG	CTAGCAGATGAG,CTAGGAAATGAG,CTAGGAGATGCG,CTAGGAGATGGG,CTAGGAGATGTG,CTAGGAGGTGAG,CTAGGGGATGAG,CTAGGNGATGAG	321	1,1,2,11,11,1,2,1
Lib10^2_#1 1 ng	CTCAGCCTGAGA	CGCAGCCTGAGA,CTCAGCCTGAGT,CTCAGCCTGGGA,CTCAGCCTGTGA	143	1,2,2,3
Lib10^2_#1 1 ng	CTCCTTGTCTTG		57
Lib10^2_#1 1 ng	CTCGAACATAGG	CTCGAAAATAGG,CTCGAACACAGG,CTCGAACATTGG,CTCGANCATAGG,CTCGCACATAGG,CTCGGACATAGG,CTCGTACATAGG,TTCGAACATAGG	295	1,1,1,1,1,1,1,1
Lib10^2_#1 1 ng	CTCGCGATGAGT	CTCGCGATGGGT,CTCGCGATGTGT,CTCGCGNTGAGT,CTCGCGTTGAGT	247	1,4,1,2
Lib10^2_#1 1 ng	CTCTCGTGTGAT		15
Lib10^2_#1 1 ng	CTCTTTTTTGAG	CACTTTTTTGAG,CTCCTTTTTGAG,CTCTTTCTTGAG,CTCTTTTATGAG,CTCTTTTCTGAG,CTCTTTTTAGAG,CTCTTTTTTCAG,CTCTTTTTTGTG,CTCTTTTTTTAG,CTGTTTTTTGAG,TTCTTTTTTGAG	260	1,1,1,1,1,1,2,19,1,1,1
Lib10^2_#1 1 ng	CTGCATATGAGC	CTGCATANGAGC,CTGCATATGAAC,CTGCATATGAGG,CTGCATATGGGC,CTGCATATGTGC,CTTCATATGAGC	183	1,1,1,4,2,1
Lib10^2_#1 1 ng	CTTACGTGAGAT	CTTACGTGTGAT	109	1
Lib10^2_#1 1 ng	CTTATGTTTCAT	CTTATGTTTCAC,CTTATNTTTCAT	235	1,1
Lib10^2_#1 1 ng	CTTCGTGCTGGG	CATCGTGCTGGG,CTCCGTGCTGGG,CTTCGAGCTGGG,CTTCGCGCTGGG,CTTCGGGCTGGG,CTTCGTGCTGCG,CTTCGTGNTGGG	323	1,1,1,1,1,1,1
Lib10^2_#1 1 ng	GAAAATAGACTG	CAAAATAGACTG,GAAAATAGTCTG,GAAATTAGACTG,GTAAATAGACTG	100	1,1,1,1
Lib10^2_#1 1 ng	GACCTGGATGCC	GACATGGATGCC,GACCTGCATGCC,GACCTGGATACC,GACCTGGATGCA,GACCTGGGTGCC,GACCTGGTTGCC,GGCCTGGATGCC,GTCCTGGATGCC	251	1,1,1,1,11,2,2,1
Lib10^2_#1 1 ng	GACTAGTTGGTT	GACTAGTGGGTT,GCCTAGTTGGTT,GTCTAGTTGGTT	208	1,1,2
Lib10^2_#1 1 ng	GAGTGTGTATGC	GAGGGTGTATGC,GAGTGAGTATGC,GAGTGTATATGC,GAGTGTGTATGT,GAGTGTNTATGC,GGGTGTGTATGC,GTGTGTGTATGC	212	1,1,1,1,1,1,2
Lib10^2_#1 1 ng	GATTTGGTAGTA	GATTTAGTAGTA,GATTTGGGAGTA,GATTTGGTAGGA,GATTTGGTAGTG,GGTTTGGTAGTA	194	1,1,1,1,1
Lib10^2_#1 1 ng	GATTTTTTGCAA	GATTTCTTGCAA,GATTTTTTACAA,GATTTTTTGCAG,GATTTTTTGCAT,GATTTTTTGCTA,GTTTTTTTGCAA	222	1,1,1,1,1,2
Lib10^2_#1 1 ng	GCCTTTGGTGTT	GACTTTGGTGTT,GCCTTTAGTGTT,GCCTTTCGTGTT,GCCTTTGATGTT,GGCTTTGGTGTT	238	1,1,1,1,1
Lib10^2_#1 1 ng	GCTGACTTTTCG	GCTGACTTTTGG,GCTGGCTTTTCG,GCTGTCTTTTCG	87	1,1,1
Lib10^2_#1 1 ng	GGAGTGGCCCAA	GGAGAGGCCCAA,GGAGGGGCCCAA,GGAGTGACCCAA,GGTGTGGCCCAA	185	1,1,1,1
Lib10^2_#1 1 ng	GGATTGAGGAGC	GGATAGAGGAGC,GGATTGAGCAGC,GGATTGAGGGGC,GGATTGAGGTGC,GGATTGGGGAGC,GGATTGTGGAGC,GGTTTGAGGAGC	275	1,1,3,11,1,2,1
Lib10^2_#1 1 ng	GGCGTTAAATCT	GGCGTAAAATCT,GGCGTGAAATCT,GGTGTTAAATCT	79	3,1,1
Lib10^2_#1 1 ng	GGCGTTCACTCT	GGCGGTCACTCT,GTCGTTCACTCT	246	1,1
Lib10^2_#1 1 ng	GGGAAGTGGTTT	GGGAAGTGCTTT,GGGAAGTGGTAT,GGGCAGTGGTTT	191	2,1,1
Lib10^2_#1 1 ng	GGGGTGTATCGG	GGGATGTATCGG,GGGGTGTATCGA,GTGGTGTATCGG	66	1,1,1
Lib10^2_#1 1 ng	GGTCGGGTTAGT	GCTCGGGTTAGT,GGTCGCGTTAGT,GGTCGGGTGAGT,GGTCGGGTTAGG,GGTCGGGTTTGT,GGTCGTGTTAGT	198	1,1,1,1,1,1
Lib10^2_#1 1 ng	GGTCTCTGGTTG		34
Lib10^2_#1 1 ng	GGTTGGCTACTA	GGGTGGCTACTA,GGTTGACTACTA	92	1,1
Lib10^2_#1 1 ng	GTACGGCACTGT	GGACGGCACTGT,GTACGCCACTGT,GTACGGCACTGG,GTACGGCCCTGT,GTACGGGACTGT,GTACGGTACTGT,GTANGGCACTGT	355	1,1,1,1,1,1,1
Lib10^2_#1 1 ng	GTACGGTGTTCA	GAACGGTGTTCA,GTACGGGGTTCA,GTACGGTGCTCA,GTACGGTGTACA,GTACGGTGTGCA,GTACGTTGTTCA,GTANGGTGTTCA,GTATGGTGTTCA,GTTCGGTGTTCA	333	1,1,1,1,1,1,1,1,1
Lib10^2_#1 1 ng	GTCTGATACTGG	GACTGATACTGG,GTCTGAGACTGG,GTCTGGTACTGG,GTCTGTTACTGG	76	1,1,1,2
Lib10^2_#1 1 ng	GTGAGCCGGGCT	CTGAGCCGGGCT,GTGACCCGGGCT,GTGAGCCAGGCT,GTGAGCCGAGCT,GTGAGCCGCGCT,GTGAGCCGGACT,GTGAGGCGGGCT,GTGCGCCGGGCT,GTGGGCCGGGCT,GTGTGCCGGGCT	447	1,1,2,1,1,1,1,2,8,6
Lib10^2_#1 1 ng	GTGGCAGCTCTA	GTGGCAGATCTA,GTGGCAGCACTA,GTGGCAGCTCTT,GTGGCAGGTCTA,GTGGCAGTTCTA	248	1,1,1,7,1
Lib10^2_#1 1 ng	GTGTGGTTGGTT	GTGTGGTTGGTA	79	1
Lib10^2_#1 1 ng	GTGTTCTAGAGG	GAGTTCTAGAGG,GCGTTCTAGAGG,GGGTTCTAGAGG,GTGATCTAGAGG,GTGGTCTAGAGG,GTGNTCTAGAGG,GTGTGCTAGAGG,GTGTTATAGAGG,GTGTTCTAGGGG,GTGTTCTAGTGG	440	1,1,1,2,1,2,1,1,14,3
Lib10^2_#1 1 ng	GTTAGGCTGCAC	CTTAGGCTGCAC,GATAGGCTGCAC,GGTAGGCTGCAC,GTTAGGCTGAAC,GTTAGGCTGCCC,GTTAGGTTGCAC	373	1,1,1,1,1,1
Lib10^2_#1 1 ng	GTTGCTAAACAT		35
Lib10^2_#1 1 ng	GTTTGTTGGCTC	GTTNGTTGGCTC,GTTTATTGGCTC,GTTTGATGGCTC,GTTTGCTGGCTC,GTTTGGTGGCTC,GTTTGTTTGCTC	301	1,1,2,2,1,1
Lib10^2_#1 1 ng	GTTTTATTTCGT	CTTTTATTTCGT,GTTTCATTTCGT,GTTTTACTTCGT,GTTTTATATCGT,GTTTTATGTCGT,GTTTTATTACGT,GTTTTATTCCGT,GTTTTATTTCGG,GTTTTTTTTCGT	310	1,1,1,2,1,1,1,1,3
Lib10^2_#1 1 ng	GTTTTTTACTTG	GATTTTTACTTG,GTTTTCTACTTG,GTTTTGTACTTG,GTTTTTTAGTTG,GTTTTTTTCTTG	159	2,1,1,1,2
Lib10^2_#1 1 ng	TAGTGGATTTAC	TAGGGGATTTAC,TAGTGAATTTAC,TAGTGGATTTTC,TAGTGGGTTTAC,TGGTGGATTTAC	360	1,1,1,3,1
Lib10^2_#1 1 ng	TATAAGATTGGG	TATAAAATTGGG,TATAAGAGTGGG,TATAAGATTAGG,TATAAGATTGGC,TATAATATTGGG,TATCAGATTGGG,TATNAGATTGGG	337	1,1,1,1,1,1,1
Lib10^2_#1 1 ng	TATCGATTATTC	TATCGGTTATTC,TATCGTTTATTC	178	1,1
Lib10^2_#1 1 ng	TATTTATTCTCC	TATTTAATCTCC,TATTTATTCCCC,TATTTATTCTAC,TATTTATTCTTC,TATTTTTTCTCC,TTTTTATTCTCC	342	1,1,1,1,1,2
Lib10^2_#1 1 ng	TATTTTTAAGCG	TATTTTTAAGCT,TATTTTTAATCG,TATTTTTAGGCG,TATTTTTCAGCG,TATTTTTNAGCG,TGTTTTTAAGCG	220	1,1,1,1,1,1
Lib10^2_#1 1 ng	TCAATCGGCGTG	ACAATCGGCGTG,TCAAGCGGCGTG,TCAATCGGCCTG,TCAATCGGCGGG,TCAATCGTCGTG,TCAATTGGCGTG,TCANTCGGCGTG	270	1,1,1,1,1,1,1
Lib10^2_#1 1 ng	TCCGTTTGCTTC	TCCGTTTGCTCC,TCCGTTTGCTTG	134	1,1
Lib10^2_#1 1 ng	TCGAACGTATTG	TAGAACGTATTG,TCCAACGTATTG,TCGAACGTAGTG,TCGGACGTATTG,TCGTACGTATTG	181	1,1,1,1,1
Lib10^2_#1 1 ng	TCGCCATGTGCT	ACGCCATGTGCT,TCGCCAGGTGCT,TCGCCATGGGCT	141	1,1,1
Lib10^2_#1 1 ng	TCGCCGTTGATT		20
Lib10^2_#1 1 ng	TCGCTGCTATTT	ACGCTGCTATTT,CCGCTGCTATTT,TCGCAGCTATTT,TCGCCGCTATTT,TCGCTGCAATTT,TCGCTGCTATTC,TCGCTGGTATTT,TTGCTGCTATTT	323	1,2,1,1,1,1,1,1
Lib10^2_#1 1 ng	TCGTTTGTACTT	ACGTTTGTACTT,TCGTATGTACTT,TCGTTTGTACAT,TCGTTTGTAGTT	184	1,1,1,1
Lib10^2_#1 1 ng	TCTATTAAGGCT	GCTATTAAGGCT,TCTAATAAGGCT,TCTATTAAGGCC,TCTATTAAGTCT,TCTATTACGGCT,TCTATTATGGCT,TCTGTTAAGGCT	378	2,1,1,1,1,2,1
Lib10^2_#1 1 ng	TCTCGCAAGCAT	ACTCGCAAGCAT,TCCCGCAAGCAT,TCTCGCAAGCCT,TCTCGCACGCAT,TCTCGCTAGCAT	308	2,1,2,1,1
Lib10^2_#1 1 ng	TCTGAACGATGT	TATGAACGATGT,TCTGAACGCTGT,TCTGAACGGTGT,TCTGAACGTTGT,TCTGAGCGATGT,TCTGCACGATGT,TCTGGACGATGT	253	1,1,1,1,1,1,3
Lib10^2_#1 1 ng	TGAGTTTATGTT	GGAGTTTATGTT,TGAGGTTATGTT,TGAGTTTATATT,TGAGTTTATGAT,TGCGTTTATGTT,TGGGTTTATGTT,TGTGTTTATGTT	107	1,1,2,1,1,1,1
Lib10^2_#1 1 ng	TGATCTGTTGCC	TGATCGGTTGCC,TGATCTGGTGCC,TGATCTGTTACC,TGATCTGTTGCT,TGATCTGTTGGC,TGATCTGTTTCC,TGATCTNTTGCC,TGCTCTGTTGCC,TGGTCTGTTGCC,TGTTCTGTTGCC	390	1,1,1,1,1,1,1,2,5,3
Lib10^2_#1 1 ng	TGCAGCCCGGGG	AGCAGCCCGGGG,TGCAGACCGGGG,TGCAGCCAGGGG,TGCAGCCCGGGC,TGTAGCCCGGGG	176	1,1,1,1,1
Lib10^2_#1 1 ng	TGCATCCAAGCT	TGCACCCAAGCT,TGCAGCCAAGCT,TGCATCCAACCT	185	1,1,1
Lib10^2_#1 1 ng	TGCTGTGGCTCA	TGCTGGGGCTCA,TGCTGTGCCTCA,TGCTGTGGCACA,TGCTGTGGCTGA,TGCTGTGGGTCA	129	1,1,1,2,1
Lib10^2_#1 1 ng	TGGCCAGACTGG	CGGCCAGACTGG,TGCCCAGACTGG,TGGCCAGGCTGG,TGGTCAGACTGG	213	1,1,3,1
Lib10^2_#1 1 ng	TGGGGGGTAACG	TAGGGGGTAACG,TGTGGGGTAACG	71	1,1
Lib10^2_#1 1 ng	TGGGGTCTAGCG	TGAGGTCTAGCG	87	1
Lib10^2_#1 1 ng	TGGTTTCCTTGG	CGGTTTCCTTGG,TGGATTCCTTGG,TGGCTTCCTTGG,TGGGTTCCTTGG,TGGTTACCTTGG,TGGTTCCCTTGG,TGGTTTCCTAGG,TGGTTTCNTTGG,TGTTTTCCTTGG	255	1,1,1,1,1,1,1,1,1
Lib10^2_#1 1 ng	TGTAAGGCTGCG	TCTAAGGCTGCG,TGGAAGGCTGCG,TGTATGGCTGCG	239	1,1,2
Lib10^2_#1 1 ng	TGTACTGAGGGA	TGTACTGAGGAA,TGTACTGAGGGC,TGTACTGAGGGG,TGTACTGCGGGA,TGTACTGGGGGA,TGTACTGTGGGA	283	1,1,2,1,1,6
Lib10^2_#1 1 ng	TGTAGTGTGACA	TGAAGTGTGACA,TGGAGTGTGACA,TGTAGAGTGACA,TGTAGTGTGGCA,TGTAGTGTGTCA	284	1,1,2,3,1
Lib10^2_#1 1 ng	TGTCGTCTCTCG	TGACGTCTCTCG,TGGCGTCTCTCG,TGTCGACTCTCG,TGTCGTGTCTCG	356	1,1,1,2
Lib10^2_#1 1 ng	TGTGTCGCGGCC	TATGTCGCGGCC,TCTGTCGCGGCC,TGTGACGCGGCC,TGTGTCGCGCCC,TGTGTNGCGGCC,TGTNTCGCGGCC	310	2,1,1,1,1,1
Lib10^2_#1 1 ng	TGTTGATCGTGT	CGTTGATCGTGT,TCTTGATCGTGT,TGATGATCGTGT,TGCTGATCGTGT,TGGTGATCGTGT,TGTAGATCGTGT,TGTGGATCGTGT,TGTTCATCGTGT,TGTTGATCGGGT,TGTTGATCGTGG,TGTTGCTCGTGT,TGTTGGTCGTGT,TGTTGTTCGTGT	342	2,1,1,2,1,1,1,1,1,1,1,4,2
Lib10^2_#1 1 ng	TTCGATTGACGC	TTCCATTGACGC,TTCGATTCACGC,TTCGATTGACGG,TTCGATTGGCGC,TTCGATTGTCGC,TTCGGTTGACGC,TTCGTTTGACGC	380	2,1,1,2,7,1,2
Lib10^2_#1 1 ng	TTCTATACATGG	TTCTATACATGT,TTCTGTACATGG	162	1,1
Lib10^2_#1 1 ng	TTCTATATGTTT	TTCTATATGATT	86	1
Lib10^2_#1 1 ng	TTGACCATAGGT	TTAACCATAGGT,TTGACCANAGGT,TTGACCATAGAT,TTGACCATAGGA,TTGACCATAGGC,TTGGCCATAGGT,TTGTCCATAGGT	216	1,1,1,2,1,1,1
Lib10^2_#1 1 ng	TTGAGTTATAAT	CTGAGTTATAAT,TTGTGTTATAAT	211	1,1
Lib10^2_#1 1 ng	TTGGATGCCTAG	CTGGATGCCTAG,GTGGATGCCTAG,TTCGATGCCTAG,TTGCATGCCTAG,TTGGAAGCCTAG,TTGGATGCCTAC,TTGGATGCCTAT,TTGGATGCCTTG,TTGGGTGCCTAG,TTGGTTGCCTAG	443	1,1,1,1,1,1,1,2,8,3
Lib10^2_#1 1 ng	TTGTAGTATCGG	TAGTAGTATCGG,TCGTAGTATCGG,TTGGAGTATCGG,TTGTAGTATCGA,TTGTANTATCGG	226	1,1,1,1,1
Lib10^2_#1 1 ng	TTTCGTTTTTTT	TTCCGTTTTTTT,TTTCGTATTTTT,TTTCGTTTTTGT	112	1,1,1
Lib10^2_#1 1 ng	TTTCTTTTGTCT	ATTCTTTTGTCT,TGTCTTTTGTCT,TTCCTTTTGTCT,TTTCTGTTGTCT	379	1,1,1,1
Lib10^2_#1 1 ng	TTTTCTTCCGCT	TTATCTTCCGCT,TTTCCTTCCGCT	82	1,1
Lib10^2_#1 3.3 ng	AAATGTCTCGCG	AAATGTCTCTCG	26	1
Lib10^2_#1 3.3 ng	AACGCGGGTATC	AACGCAGGTATC,AACGCGGCTATC,AACGCGGGAATC,AACGCGTGTATC,AACGCTGGTATC,AACGNGGGTATC,ATCGCGGGTATC	609	1,2,1,1,1,1,1
Lib10^2_#1 3.3 ng	AAGGGCTTCGAC	AAGGCCTTCGAC,AAGGGCTACGAC,AAGGGCTTCCAC,AAGGGCTTCGCC,AAGGGCTTCGGC,AAGGGCTTCGTC,AAGGGTTTCGAC,ATGGGCTTCGAC	423	1,1,2,1,4,6,1,1
Lib10^2_#1 3.3 ng	AATTTCTCTGAT	AATATCTCTGAT,AATTTCTCTCAT,AATTTCTCTGGT,AATTTCTCTGTT,ATTTTCTCTGAT	324	1,1,5,2,1
Lib10^2_#1 3.3 ng	ACCCATGTGAGG	ACCCATGTGTGG,TCCCATGTGAGG	40	3,1
Lib10^2_#1 3.3 ng	ACCGGAATCAAG	ACCGCAATCAAG,ACCGGAAACAAG,ACCGGAANCAAG,ACCGGAATCACG,ACCGGAATCAGG,ACCGGNATCAAG,ACCGGTATCAAG,ACTGGAATCAAG,GCCGGAATCAAG	396	2,1,1,3,3,1,1,1,1
Lib10^2_#1 3.3 ng	ACTGGTGAGGAT	ACTGATGAGGAT,ACTGGGGAGGAT,ACTGGTGAGGTT,ACTGGTGAGTAT,ACTGGTGCGGAT,ACTGGTGGGGAT,ACTGGTGTGGAT,TCTGGTGAGGAT	384	1,2,2,1,1,1,2,1
Lib10^2_#1 3.3 ng	ACTTACTATGTT	ACCTACTATGTT,ACTCACTATGTT,ACTNACTATGTT	145	1,1,1
Lib10^2_#1 3.3 ng	ACTTAGCCGCAC	ACTTTGCCGCAC	185	1
Lib10^2_#1 3.3 ng	AGCAATGGGGAT	AGCAATGCGGAT,AGCAATGGGAAT,AGCNATGGGGAT	36	1,1,1
Lib10^2_#1 3.3 ng	AGCTTGTTTATC	AGCTCGTTTATC,AGCTTCTTTATC,AGCTTGATTATC,AGCTTGGTTATC,AGCTTGTTTACC,AGCTTGTTTTTC,AGCTTNTTTATC,ATCTTGTTTATC,GGCTTGTTTATC,TGCTTGTTTATC	374	1,1,1,1,1,1,1,1,1,1
Lib10^2_#1 3.3 ng	AGGCTGGGGGTA	AGGCTGCGGGTA,AGGCTGGCGGTA,AGGCTGGGGGGA,AGGCTGGTGGTA,AGGCTGTGGGTA,AGGNTGGGGGTA,ATGCTGGGGGTA	354	1,1,2,2,1,1,1
Lib10^2_#1 3.3 ng	AGGGTCCGCGTC		44
Lib10^2_#1 3.3 ng	AGTCAACTAGCC	AGTCATCTAGCC	85	1
Lib10^2_#1 3.3 ng	AGTCGGGACGGA	AGACGGGACGGA,AGGCGGGACGGA,AGTCCGGACGGA,AGTCGAGACGGA,AGTCGCGACGGA,AGTCGGAACGGA,AGTCGGGACGGG,AGTCGGGACGGT,AGTCGGGACTGA,AGTCGGGATGGA,AGTCGGGCCGGA,AGTCGGGGCGGA,AGTCGGGNCGGA,AGTCGGGTCGGA,AGTCGGNACGGA,AGTCGTGACGGA,AGTNGGGACGGA,AGTTGGGACGGA	520	1,1,1,1,1,1,2,1,1,1,1,2,1,4,1,1,1,1
Lib10^2_#1 3.3 ng	AGTCTCTCGTGA	AGCCTCTCGTGA,AGTCTCCCGTGA,AGTCTCTCGTGG,AGTCTCTGGTGA,AGTCTCTTGTGA,AGTCTTTCGTGA	328	1,1,2,1,1,1
Lib10^2_#1 3.3 ng	AGTGCATGGGGA	ACTGCATGGGGA,AGTGCANGGGGA,AGTGTATGGGGA	170	1,1,1
Lib10^2_#1 3.3 ng	ATCAAATGCTTT	ATCAAAGGCTTT,ATCAATTGCTTT,ATCACATGCTTT	479	1,1,1
Lib10^2_#1 3.3 ng	ATCAATGGGTGG	ATCAAGGGGTGG,ATCAATGAGTGG,ATCAATGGGAGG,ATCAATGGGGGG,TTCAATGGGTGG	257	1,2,1,5,1
Lib10^2_#1 3.3 ng	ATCGGTGAACCA	ACCGGTGAACCA,AGCGGTGAACCA,ATCGGAGAACCA,ATCGGGGAACCA,ATCGGTGAACCC,ATCGGTGAAGCA,ATCGGTGACCCA,ATCGGTGATCCA,ATCGGTGGACCA,ATCGGTGTACCA	318	1,1,2,2,1,1,1,2,4,3
Lib10^2_#1 3.3 ng	ATGGGGAAGCAT	ATGAGGAAGCAT,ATGGAGAAGCAT,ATGGGGAAGAAT,ATGGGGAAGGAT,ATGGGGGAGCAT,ATGGGGNAGCAT	490	1,1,1,1,6,1
Lib10^2_#1 3.3 ng	ATTCGGGTTGTT	ATTCCGGTTGTT,ATTCGCGTTGTT,ATTCGGGATGTT,ATTCGGGTTGGT,ATTCGGTTTGTT,ATTTGGGTTGTT	247	1,1,2,3,1,1
Lib10^2_#1 3.3 ng	ATTCGTTTTAGA	ATTCGCTTTAGA,ATTCGTTCTAGA,ATTCGTTTTAGC,ATTCGTTTTAGG,ATTCGTTTTGGA	296	1,1,1,3,1
Lib10^2_#1 3.3 ng	ATTGATCTGATT	ATAGATCTGATT,ATTGANCTGATT,ATTGATCNGATT,ATTGATCTGATA,ATTGATCTGCTT,ATTGATGTGATT,ATTGCTCTGATT,ATTGGTCTGATT,ATTGTTCTGATT	217	1,2,1,1,1,1,1,4,1
Lib10^2_#1 3.3 ng	CAAGAGGTGATC	CAACAGGTGATC,CAAGAGGGGATC,CAAGAGGTGACC,CAAGAGGTGAGC,CAAGAGGTGGTC,CAAGAGGTGTTC,CAAGAGNTGATC,CAAGGGGTGATC,CAAGTGGTGATC,CAANAGGTGATC,CATGAGGTGATC	321	1,3,1,2,1,1,1,3,2,1,1
Lib10^2_#1 3.3 ng	CAGGCAATAAGG	CAGACAATAAGG,CAGCCAATAAGG,CAGGCAATAGGG,CAGGCAATATGG,CAGGTAATAAGG	253	1,1,1,2,1
Lib10^2_#1 3.3 ng	CAGGTGTTTGCC	CAGCTGTTTGCC,CAGGAGTTTGCC,CAGGTGATTGCC,CAGGTGGTTGCC,CAGGTGNTTGCC,CAGGTGTATGCC,CAGGTGTCTGCC,CAGGTGTTTACC,CAGGTGTTTCCC,CAGGTGTTTGCT,CAGGTGTTTGGC	464	1,1,1,1,1,3,5,2,1,2,1
Lib10^2_#1 3.3 ng	CAGTGTTTAACC	CAGTGTTTAATC	49	1
Lib10^2_#1 3.3 ng	CATCTGCCGATT	CATCTCCCGATT,CATCTGCCCATT,CATCTGCCGCTT,CATCTGCCGGTT,CATCTGCTGATT,CATCTTCCGATT,CTTCTGCCGATT	399	1,1,1,3,2,1,1
Lib10^2_#1 3.3 ng	CCGGTCTTTTAC	CCCGTCTTTTAC,CCGGGCTTTTAC,CCGGTCTCTTAC,CCGGTCTGTTAC,CCGGTCTTCTAC,CCGGTGTTTTAC,GCGGTCTTTTAC	463	1,1,1,1,3,1,1
Lib10^2_#1 3.3 ng	CCGGTTATTAGC	CCGATTATTAGC,CCGGTAATTAGC,CCGGTCATTAGC,GCGGTTATTAGC	236	1,1,1,1
Lib10^2_#1 3.3 ng	CCGTAACGTTTT	CCGGAACGTTTT,CCGTAACGATTT,CCGTAACGGTTT,CCGTAACGTATT,CCGTAACGTGTT,CCGTAACGTTTG,CCGTACCGTTTT,GCGTAACGTTTT	282	1,1,1,4,1,1,1,1
Lib10^2_#1 3.3 ng	CCTATTCGTTGT		96
Lib10^2_#1 3.3 ng	CCTGTATCACAA	CATGTATCACAA,CCTGGATCACAA,GCTGTATCACAA	207	1,1,1
Lib10^2_#1 3.3 ng	CGCCGACATATA	CGCCGGCATATA,CTCCGACATATA	50	2,1
Lib10^2_#1 3.3 ng	CGCCGGCCGGTT	CGCCGGCCGGAT	98	1
Lib10^2_#1 3.3 ng	CGTTTGTTGTTA	CGTATGTTGTTA,CGTCTGTTGTTA,CGTTGGTTGTTA,CGTTTGGTGTTA,CGTTTGTAGTTA,CGTTTGTNGTTA,CGTTTGTTGATA,CGTTTGTTGGTA,CGTTTGTTGTTN	237	5,1,1,2,1,1,1,1,1
Lib10^2_#1 3.3 ng	CGTTTTTTTCGT	CCTTTTTTTCGT,CGTATTTTTCGT,CGTCTTTTTCGT,CGTGTTTTTCGT,CGTTNTTTTCGT,CGTTTTTTACGT,CGTTTTTTTCCT,CGTTTTTTTCGA,CGTTTTTTTCGG,CGTTTTTTTTGT	271	1,12,9,5,1,1,1,1,1,1
Lib10^2_#1 3.3 ng	CTAGGAGATGAG	CCAGGAGATGAG,CTAAGAGATGAG,CTAGAAGATGAG,CTAGCAGATGAG,CTAGGAAATGAG,CTAGGAGATGCG,CTAGGAGATGGG,CTAGGAGATGTG,CTAGGAGTTGAG,CTAGGCGATGAG,CTAGGGGATGAG,CTAGGTGATGAG	432	1,1,1,1,1,3,12,17,1,1,1,2
Lib10^2_#1 3.3 ng	CTCAGCCTGAGA	CTCAGCCTGAGG,CTCAGCCTGGGA,CTCAGCCTGTGA,CTGAGCCTGAGA,CTTAGCCTGAGA	156	2,1,3,1,1
Lib10^2_#1 3.3 ng	CTCCTTGTCTTG	CTCCTTGCCTTG	77	1
Lib10^2_#1 3.3 ng	CTCGAACATAGG	CACGAACATAGG,CTCCAACATAGG,CTCGANCATAGG,CTCGGACATAGG,CTCGTACATAGG	386	2,1,1,2,4
Lib10^2_#1 3.3 ng	CTCGCGATGAGT	CTCCCGATGAGT,CTCGCGATGAGG,CTCGCGATGCGT,CTCGCGATGGGT,CTCGCGATGTGT,CTCGCGCTGAGT,CTCGCGTTGAGT,CTCGCTATGAGT,CTCGGGATGAGT	304	1,1,3,2,2,1,1,1,1
Lib10^2_#1 3.3 ng	CTCTTTTTTGAG	CTCTTTTNTGAG,CTCTTTTTGGAG,CTCTTTTTTGGG	359	1,2,33
Lib10^2_#1 3.3 ng	CTGCATATGAGC	CTGCATATGAGG,CTGCATATGGGC,CTGCATATGTGC,CTGCATNTGAGC	212	1,4,3,2
Lib10^2_#1 3.3 ng	CTTACGTGAGAT	CTTACCTGAGAT,CTTACGTGAGGT,CTTACGTGTGAT	132	2,1,3
Lib10^2_#1 3.3 ng	CTTATGTTTCAT	CTCATGTTTCAT,CTTATGATTCAT,CTTATGGTTCAT,CTTATGNTTCAT,CTTATGTTACAT,CTTATNTTTCAT,GTTATGTTTCAT	338	1,3,1,1,1,1,2
Lib10^2_#1 3.3 ng	CTTCGTGCTGGG	CATCGTGCTGGG,CTACGTGCTGGG,CTTCGAGCTGGG,CTTCGGGCTGGG,CTTCGTGCAGGG,CTTCGTGCTGCG,CTTCGTGCTGGA,CTTCGTGGTGGG,CTTNGTGCTGGG	423	3,1,1,1,1,1,1,1,1
Lib10^2_#1 3.3 ng	GAAAATAGACTG	GAAAATAGACCG,GAAAATAGCCTG,GAAAATAGGCTG,GTAAATAGACTG	163	1,1,1,1
Lib10^2_#1 3.3 ng	GACCTGGATGCC	GACCTGGAGGCC,GACCTGGCTGCC,GACCTGGGTGCC,GACCTGGTTGCC,GGCCTGGATGCC,GTCCTGGATGCC	282	1,1,1,4,2,4
Lib10^2_#1 3.3 ng	GACTAGTTGGTT	GAATAGTTGGTT,GACTACTTGGTT,GACTAGTAGGTT,GACTAGTNGGTT,GACTAGTTAGTT,GACTAGTTGGAT,GACTAGTTGGCT,GACTAGTTGGGT,GGCTAGTTGGTT	268	1,1,1,1,1,2,1,1,1
Lib10^2_#1 3.3 ng	GAGTGTGTATGC	GAGAGTGTATGC,GAGTCTGTATGC,GAGTGGGTATGC,GAGTGTGGATGC,GAGTGTNTATGC,GTGTGTGTATGC	282	2,1,1,1,1,1
Lib10^2_#1 3.3 ng	GATTTGGTAGTA	GACTTGGTAGTA,GATATGGTAGTA,GATTTCGTAGTA,GATTTGGTACTA,GATTTGGTAGAA,GATTTGGTAGGA,GATTTGGTGGTA,GATTTGGTTGTA,GATTTGNTAGTA	291	1,1,1,1,1,1,1,2,1
Lib10^2_#1 3.3 ng	GATTTTTTGCAA	GATTGTTTGCAA,GATTTATTGCAA,GATTTTCTGCAA,GATTTTGTGCAA,GATTTTNTGCAA,GGTTTTTTGCAA	274	1,1,1,1,1,1
Lib10^2_#1 3.3 ng	GCCTTTGGTGTT	GCCCTTGGTGTT,GCCTATGGTGTT,GCCTGTGGTGTT,GCCTTGGGTGTT,GCCTTTAGTGTT,GCCTTTGGTATT,GCCTTTGGTGGT,GCCTTTGGTGTA,GCGTTTGGTGTT,GGCTTTGGTGTT	352	1,1,1,1,1,1,1,1,1,1
Lib10^2_#1 3.3 ng	GCTGACTTTTCG	GCTGACTTTACG,GCTGACTTTCCG,GCTGCCTTTTCG	131	1,1,2
Lib10^2_#1 3.3 ng	GGAGTGGCCCAA	GGAGGGGCCCAA,GGAGTGTCCCAA,GGTGTGGCCCAA,GTAGTGGCCCAA	286	1,1,2,1
Lib10^2_#1 3.3 ng	GGATTGAGGAGC	GGAATGAGGAGC,GGATTGAGGAAC,GGATTGAGGGGC,GGATTGAGGTGC,GGATTGATGAGC,GGATTGCGGAGC,GGATTGGGGAGC,GGATTGTGGAGC,GGGTTGAGGAGC,GGTTTGAGGAGC	356	1,1,4,4,1,3,2,1,1,2
Lib10^2_#1 3.3 ng	GGCGTTAAATCT	GGCGTAAAATCT,GGCGTCAAATCT,GGCGTGAAATCT,GGCTTTAAATCT,GTCGTTAAATCT	91	3,4,2,1,1
Lib10^2_#1 3.3 ng	GGCGTTCACTCT	GCCGTTCACTCT,GGCCTTCACTCT,GGCGGTCACTCT,GGCGTACACTCT,GGCGTGCACTCT,GGCGTTCACACT,GGCGTTCACTTT,GGCNTTCACTCT,TGCGTTCACTCT	288	1,1,1,2,2,1,1,1,1
Lib10^2_#1 3.3 ng	GGGAAGTGGTTT	GCGAAGTGGTTT,GGAAAGTGGTTT,GGGAAGTGGTCT,GGGAAGTGGTTA,GGGAATTGGTTT	221	1,1,2,1,1
Lib10^2_#1 3.3 ng	GGGGTGTATCGG	GGGGTATATCGG,GGGGTGTATCGA	91	1,1
Lib10^2_#1 3.3 ng	GGTCGGGTTAGT	GATCGGGTTAGT,GCTCGGGTTAGT,GGACGGGTTAGT,GGTCCGGTTAGT,GGTCGGGTGAGT,GGTCGGGTTTGT,GGTCGGTTTAGT	226	1,1,1,2,1,1,1
Lib10^2_#1 3.3 ng	GGTCTCTGGTTG	GGTCTCTGGGTG	50	1
Lib10^2_#1 3.3 ng	GGTTGGCTACTA	GGGTGGCTACTA,GTTTGGCTACTA	129	2,1
Lib10^2_#1 3.3 ng	GTACGGCACTGT	GAACGGCACTGT,GTAAGGCACTGT,GTACGGCACTGG,GTACGGCNCTGT,GTACGGCTCTGT,GTACGTCACTGT,GTTCGGCACTGT	496	1,1,2,2,1,1,2
Lib10^2_#1 3.3 ng	GTACGGTGTTCA	GAACGGTGTTCA,GCACGGTGTTCA,GGACGGTGTTCA,GTACCGTGTTCA,GTGCGGTGTTCA	454	1,1,2,1,1
Lib10^2_#1 3.3 ng	GTCTGATACTGG	GTCTGATACTGT,GTCTGATATTGG,GTCTGCTACTGG,GTCTGGTACTGG,GTCTGTTACTGG	93	1,1,1,2,1
Lib10^2_#1 3.3 ng	GTGAGCCGGGCT	GAGAGCCGGGCT,GTGACCCGGGCT,GTGAGCCCGGCT,GTGAGCCGAGCT,GTGAGCCGCGCT,GTGAGCCGGCCT,GTGAGCCGGGCG,GTGAGCCGGGGT,GTGAGGCGGGCT,GTGGGCCGGGCT,GTGTGCCGGGCT	521	1,1,1,1,1,2,1,1,1,11,13
Lib10^2_#1 3.3 ng	GTGGCAGCTCTA	CTGGCAGCTCTA,GAGGCAGCTCTA,GGGGCAGCTCTA,GTGGCAGATCTA,GTGGCAGCGCTA,GTGGCAGGTCTA,GTGGCAGNTCTA,GTGGCAGTTCTA,GTGGCANCTCTA,GTGGCTGCTCTA,GTGGTAGCTCTA	382	1,1,1,4,1,10,1,2,1,1,1
Lib10^2_#1 3.3 ng	GTGTGGTTGGTT	GTGTGGTTGGTG,GTGTGNTTGGTT	95	1,1
Lib10^2_#1 3.3 ng	GTGTTCTAGAGG	GTGATCTAGAGG,GTGCTCTAGAGG,GTGTTCTAGCGG,GTGTTCTAGGGG,GTGTTCTAGTGG,GTGTTCTTGAGG	551	2,1,1,8,14,1
Lib10^2_#1 3.3 ng	GTTAGGCTGCAC	GGTAGGCTGCAC,GTCAGGCTGCAC,GTGAGGCTGCAC,GTTAGGCAGCAC,GTTAGGCTGTAC	501	1,1,2,1,1
Lib10^2_#1 3.3 ng	GTTGCTAAACAT		27
Lib10^2_#1 3.3 ng	GTTTGTTGGCTC	GATTGTTGGCTC,GGTTGTTGGCTC,GTGTGTTGGCTC,GTTNGTTGGCTC,GTTTGATGGCTC,GTTTGGTGGCTC,GTTTGTTGGATC,GTTTGTTGGCGC,GTTTGTTGGGTC,GTTTGTTGGTTC	382	1,1,1,1,3,2,1,1,1,2
Lib10^2_#1 3.3 ng	GTTTTATTTCGT	GTTATATTTCGT,GTTTTATNTCGT,GTTTTATTTAGT,GTTTTATTTCCT,GTTTTATTTCGA,GTTTTATTTCGG,GTTTTATTTGGT	381	1,1,3,1,1,1,1
Lib10^2_#1 3.3 ng	GTTTTTTACTTG	GTTTTATACTTG,GTTTTTTCCTTG,GTTTTTTGCTTG	217	1,1,1
Lib10^2_#1 3.3 ng	TAAGCTCTCAGT		36
Lib10^2_#1 3.3 ng	TAGTGGATTTAC	TAGTGCATTTAC,TAGTGGATGTAC,TAGTGGATTCAC,TAGTGGCTTTAC,TAGTGGGTTTAC,TAGTGGTTTTAC,TAGTGTATTTAC,TCGTGGATTTAC,TTGTGGATTTAC	467	1,1,1,1,1,1,1,1,2
Lib10^2_#1 3.3 ng	TATAAGATTGGG	TAAAAGATTGGG,TATAAGATTGGT,TATAAGGTTGGG,TATAAGTTTGGG,TATCAGATTGGG	434	1,1,1,2,1
Lib10^2_#1 3.3 ng	TATCGATTATTC	TATCGATNATTC,TATCGATTATGC,TATCGGTTATTC,TATCGTTTATTC,TATNGATTATTC	225	1,1,1,4,1
Lib10^2_#1 3.3 ng	TATTTATTCTCC	TACTTATTCTCC,TATGTATTCTCC,TATTTCTTCTCC,TATTTGTTCTCC,TATTTTTTCTCC	435	1,1,1,2,3
Lib10^2_#1 3.3 ng	TATTTTTAAGCG	CATTTTTAAGCG,TAATTTTAAGCG,TATTATTAAGCG,TATTTTNAAGCG,TATTTTTAAGTG,TATTTTTAGGCG,TATTTTTATGCG,TATTTTTNAGCG	309	1,1,1,1,1,2,2,1
Lib10^2_#1 3.3 ng	TCAATCGGCGTG	TCAAGCGGCGTG,TCAATCGGCGGG,TCAATCGGGGTG,TCATTCGGCGTG,TCCATCGGCGTG	319	1,1,1,1,1
Lib10^2_#1 3.3 ng	TCCGTTTGCTTC	TCCCTTTGCTTC,TCCGTATGCTTC,TCCGTGTGCTTC,TCCNTTTGCTTC,TCTGTTTGCTTC	160	1,2,1,1,1
Lib10^2_#1 3.3 ng	TCGAACGTATTG	TCGAANGTATTG,TCGGACGTATTG,TCGTACGTATTG	204	1,1,1
Lib10^2_#1 3.3 ng	TCGCCATGTGCT	TCGCCATCTGCT,TCGCCATGTACT,TCGCGATGTGCT	194	1,1,1
Lib10^2_#1 3.3 ng	TCGCCGTTGATT	TAGCCGTTGATT	29	1
Lib10^2_#1 3.3 ng	TCGCTGCTATTT	ACGCTGCTATTT,GCGCTGCTATTT,TCGCAGCTATTT,TCGCTGCNATTT,TCGCTGCTATCT,TCGCTGGTATTT	421	1,1,1,2,1,1
Lib10^2_#1 3.3 ng	TCGTTTGTACTT	ACGTTTGTACTT,TCGATTGTACTT,TCGGTTGTACTT,TCGTTAGTACTT,TCGTTTGTANTT,TCTTTTGTACTT	234	1,2,1,1,1,1
Lib10^2_#1 3.3 ng	TCTATTAAGGCT	ACTATTAAGGCT,TATATTAAGGCT,TCTATNAAGGCT,TCTATTAAGACT,TCTATTAAGGCA,TCTATTAAGGCC,TCTATTTAGGCT	491	2,1,1,2,1,1,1
Lib10^2_#1 3.3 ng	TCTCGCAAGCAT	TCGCGCAAGCAT,TCTCACAAGCAT,TCTCGAAAGCAT,TCTCGCAGGCAT,TCTNGCAAGCAT	368	1,1,1,1,1
Lib10^2_#1 3.3 ng	TCTGAACGATGT	TATGAACGATGT,TCTGAAAGATGT,TCTGAACGATGG,TCTGAACGGTGT,TCTGAGCGATGT,TCTGATCGATGT,TCTGGACGATGT,TCTGTACGATGT	345	1,1,1,2,2,1,2,2
Lib10^2_#1 3.3 ng	TGAGTTTATGTT	TGAGTTGATGTT,TGAGTTTAAGTT,TGCGTTTATGTT,TGGGTTTATGTT,TGTGTTTATGTT	142	1,1,1,1,1
Lib10^2_#1 3.3 ng	TGATCTGTTGCC	TCATCTGTTGCC,TGATCAGTTGCC,TGATCCGTTGCC,TGATCTGATGCC,TGATCTGGTGCC,TGATCTGTTGGC,TGATCTGTTGTC,TGATCTGTTTCC,TGATCTNTTGCC,TGCTCTGTTGCC,TGGTCTGTTGCC,TGTTCTGTTGCC	485	1,1,1,1,4,1,1,1,1,3,4,4
Lib10^2_#1 3.3 ng	TGCAGCCCGGGG	TACAGCCCGGGG,TGCAGCCCCGGG,TGCCGCCCGGGG,TGCTGCCCGGGG,TGGAGCCCGGGG,TGTAGCCCGGGG	226	1,1,1,1,1,1
Lib10^2_#1 3.3 ng	TGCATCCAAGCT	AGCATCCAAGCT,TGCATACAAGCT,TGCATCCAACCT	260	1,1,1
Lib10^2_#1 3.3 ng	TGCTGTGGCTCA	CGCTGTGGCTCA,GGCTGTGGCTCA,TGCTGAGGCTCA	164	1,1,1
Lib10^2_#1 3.3 ng	TGGCCAGACTGG	GGGCCAGACTGG,TGGCCAGAGTGG,TGGCCAGGCTGG,TGGCCAGTCTGG	251	2,1,3,3
Lib10^2_#1 3.3 ng	TGGGGGGTAACG	TAGGGGGTAACG,TGGCGGGTAACG	78	1,1
Lib10^2_#1 3.3 ng	TGGGGTCTAGCG	AGGGGTCTAGCG,CGGGGTCTAGCG,TGGGCTCTAGCG,TGGGGTCTCGCG	106	1,1,1,1
Lib10^2_#1 3.3 ng	TGGTTTCCTTGG	TGGATTCCTTGG,TGGGTTCCTTGG,TGGTATCCTTGG,TGGTTTCCGTGG,TGGTTTCCTTGA,TGGTTTNCTTGG	319	1,2,1,1,1,1
Lib10^2_#1 3.3 ng	TGTAAGGCTGCG	TGAAAGGCTGCG,TGGAAGGCTGCG,TGTAANGCTGCG,TGTAGGGCTGCG,TGTATGGCTGCG	316	1,1,1,1,2
Lib10^2_#1 3.3 ng	TGTACTGAGGGA	TCTACTGAGGGA,TGAACTGAGGGA,TGTAATGAGGGA,TGTACTGAGGCA,TGTACTGAGGGG,TGTACTGAGGGT,TGTACTGGGGGA,TGTACTGNGGGA,TGTACTGTGGGA,TGTGCTGAGGGA	373	2,1,1,1,1,1,5,1,1,1
Lib10^2_#1 3.3 ng	TGTAGTGTGACA	CGTAGTGTGACA,TGGAGTGTGACA,TGTAGGGTGACA,TGTAGTGTAACA,TGTAGTGTGGCA	414	1,2,1,1,1
Lib10^2_#1 3.3 ng	TGTCGTCTCTCG	AGTCGTCTCTCG,TGACGTCTCTCG,TGGCGTCTCTCG,TGTCGACTCTCG,TGTCGTCGCTCG,TGTCGTCTCTCC,TGTCTTCTCTCG	474	1,1,5,2,1,1,1
Lib10^2_#1 3.3 ng	TGTGTCGCGGCC	TGAGTCGCGGCC,TGTGGCGCGGCC,TGTGTCGAGGCC,TGTGTCGCGCCC,TGTGTCGGGGCC,TGTGTCTCGGCC	391	1,1,1,1,1,1
Lib10^2_#1 3.3 ng	TGTTGATCGTGT	AGTTGATCGTGT,TGATGATCGTGT,TGGTGATCGTGT,TGTTGAGCGTGT,TGTTGATAGTGT,TGTTGATCCTGT,TGTTGATCGAGT,TGTTGATCGGGT,TGTTGATCGTGA,TGTTGATCGTGG,TGTTGATNGTGT,TGTTGATTGTGT,TGTTGCTCGTGT,TGTTGGTCGTGT,TGTTGNTCGTGT,TGTTGTTCGTGT	458	1,2,4,1,1,1,1,4,1,1,1,1,1,5,1,1
Lib10^2_#1 3.3 ng	TTCGATTGACGC	TACGATTGACGC,TTAGATTGACGC,TTCAATTGACGC,TTCGAATGACGC,TTCGAGTGACGC,TTCGATTGACGT,TTCGATTGCCGC,TTCGATTGGCGC,TTCGATTGTCGC,TTCGCTTGACGC,TTTGATTGACGC	513	1,1,1,1,1,1,3,2,15,1,1
Lib10^2_#1 3.3 ng	TTCTATACATGG	TTCTATACATGA,TTCTATACATGT,TTCTATNCATGG,TTCTGTACATGG	225	1,2,1,1
Lib10^2_#1 3.3 ng	TTCTATATGTTT	GTCTATATGTTT,TTCTACATGTTT,TTCTATAAGTTT,TTCTATATGTCT,TTCTATATGTGT	139	1,1,1,1,1
Lib10^2_#1 3.3 ng	TTGACCATAGGT	TTGACCATAAGT,TTGCCCATAGGT,TTGGCCATAGGT,TTGTCCATAGGT	295	1,1,1,6
Lib10^2_#1 3.3 ng	TTGAGTTATAAT	TTCAGTTATAAT,TTGAGTCATAAT,TTGGGTTATAAT,TTGTGTTATAAT	271	2,1,1,4
Lib10^2_#1 3.3 ng	TTGGATGCCTAG	TTGGAAGCCTAG,TTGGAGGCCTAG,TTGGATACCTAG,TTGGATGCCAAG,TTGGATGCCGAG,TTGGATGCCTAC,TTGGATGCCTTG,TTGGGTGCCTAG,TTGGTTGCCTAG,TTGNATGCCTAG	528	1,1,1,1,1,1,2,4,3,1
Lib10^2_#1 3.3 ng	TTGGTTCTAATT		26
Lib10^2_#1 3.3 ng	TTGTAGTATCGG	CTGTAGTATCGG,TTGGAGTATCGG,TTGTAGAATCGG,TTGTAGNATCGG,TTGTAGTATCGC	290	1,2,1,1,1
Lib10^2_#1 3.3 ng	TTTCGTTTTTTT	ATTCGTTTTTTT,TTTCGTTTTTCT	148	1,1
Lib10^2_#1 3.3 ng	TTTCTTTTGTCT	TTTCTTTAGTCT,TTTCTTTCGTCT,TTTCTTTTGGCT	524	1,1,1
Lib10^2_#1 3.3 ng	TTTTCTTCCGCT	TTTTCTTCCGGT	112	1
Lib10^2_#1 10 ng	AAATGTCTCGCG		17
Lib10^2_#1 10 ng	AACGCGGGTATC	AACGAGGGTATC,AACGCAGGTATC,AACGCGGGAATC,AACGCGGGGATC,AACGCGGGTAGC,AACGCGGGTCTC,AACGCGGGTGTC,AACGCGGGTTTC,AACGCGGNTATC,AACGCGNGTATC,AACGTGGGTATC,AGCGCGGGTATC	470	1,1,2,1,1,1,1,1,1,1,3,1
Lib10^2_#1 10 ng	AAGGGCTTCGAC	AAGGCCTTCGAC,AAGGGCNTCGAC,AAGGGCTNCGAC,AAGGGCTTCAAC,AAGGGCTTCCAC,AAGGGCTTCGCC,AAGGGCTTCGGC,AAGGGCTTCGTC,AAGGGCTTGGAC,AAGGGNTTCGAC,AAGGTCTTCGAC,AAGNGCTTCGAC,ATGGGCTTCGAC	360	1,1,1,1,1,1,1,2,1,1,1,1,2
Lib10^2_#1 10 ng	AATTTCTCTGAT	AAATTCTCTGAT,AATATCTCTGAT,AATGTCTCTGAT,AATTCCTCTGAT,AATTTCTCTAAT,AATTTCTCTGGT,AATTTCTCTGTT,AATTTCTCTTAT	275	1,1,1,1,1,3,4,1
Lib10^2_#1 10 ng	ACCCATGTGAGG	ACCCATGTGTGG	35	4
Lib10^2_#1 10 ng	ACCGGAATCAAG	ACCGGAATCACG,ACCGGAATCAGG,ACCGGAATCATG,ACCGGCATCAAG,ACCGGGATCAAG,ACCGGNATCAAG,ATCGGAATCAAG	284	3,2,5,1,1,1,1
Lib10^2_#1 10 ng	ACTGGTGAGGAT	ACTGGGGAGGAT,ACTGGTGACGAT,ACTGGTGAGAAT,ACTGGTGAGGGT,ACTGGTGAGGTT,ACTGGTGGGGAT,ACTGGTGTGGAT,AGTGGTGAGGAT,CCTGGTGAGGAT	338	2,1,1,3,1,3,4,1,1
Lib10^2_#1 10 ng	ACTTACTATGTT	ACTTACTATATT,ACTTACTATGGT,ACTTANTATGTT,GCTTACTATGTT	120	1,1,1,1
Lib10^2_#1 10 ng	ACTTAGCCGCAC	ACTNAGCCGCAC,ACTTGGCCGCAC,ACTTTGCCGCAC,TCTTAGCCGCAC	179	1,1,1,1
Lib10^2_#1 10 ng	AGCAATGGGGAT		28
Lib10^2_#1 10 ng	AGCTTGTTTATC	AGCTTGATTATC,AGCTTGGTTATC,GGCTTGTTTATC	333	3,2,2
Lib10^2_#1 10 ng	AGGCTGGGGGTA	AAGCTGGGGGTA,AGACTGGGGGTA,AGGCTGGGCGTA,AGGCTGGGGCTA,AGGCTGGGGGAA,AGGCTGGGGGCA,AGGCTGGGGGGA,AGGCTGTGGGTA,AGGTTGGGGGTA,GGGCTGGGGGTA	241	1,1,1,1,1,1,1,1,1,1
Lib10^2_#1 10 ng	AGGGTCCGCGTC	AGGGTCCGCGTA	44	1
Lib10^2_#1 10 ng	AGTCAACTAGCC	TGTCAACTAGCC	44	1
Lib10^2_#1 10 ng	AGTCGGGACGGA	AGACGGGACGGA,AGGCGGGACGGA,AGTCGGAACGGA,AGTCGGGACGAA,AGTCGGGACGCA,AGTCGGGACGGG,AGTCGGGACGGT,AGTCGGGACTGA,AGTCGGGGCGGA,AGTCGGGTCGGA,AGTCGTGACGGA,AGTCTGGACGGA,AGTNGGGACGGA,AGTTGGGACGGA	390	2,1,3,1,1,2,1,1,2,6,1,1,1,1
Lib10^2_#1 10 ng	AGTCTCTCGTGA	AGTCCCTCGTGA,AGTCTCTCGAGA,AGTCTCTCGTGG,AGTCTCTCGTGT	249	1,1,2,1
Lib10^2_#1 10 ng	AGTGCATGGGGA	ACTGCATGGGGA,AGTACATGGGGA,AGTGCATGGGGT	112	1,1,1
Lib10^2_#1 10 ng	ATCAAATGCTTT	ATCAACTGCTTT,ATCAAGTGCTTT,ATCACATGCTTT,ATCATATGCTTT,ATGAAATGCTTT,GTCAAATGCTTT	413	1,2,1,1,1,1
Lib10^2_#1 10 ng	ATCAATGGGTGG	ACCAATGGGTGG,ANCAATGGGTGG,ATCAACGGGTGG,ATCAATGCGTGG,ATCAATGGGAGG,ATCAATGGGTAG,ATCAATGGGTGA,ATCTATGGGTGG	245	1,1,1,1,2,1,1,1
Lib10^2_#1 10 ng	ATCGGTGAACCA	ACCGGTGAACCA,ATCGGAGAACCA,ATCGGTGAACTA,ATCGGTGACCCA,ATCGGTGAGCCA,ATCGGTGCACCA,ATCGGTGGACCA,ATCGGTGTACCA,CTCGGTGAACCA	273	1,1,1,1,1,1,6,4,1
Lib10^2_#1 10 ng	ATGGGGAAGCAT	ACGGGGAAGCAT,ATGGAGAAGCAT,ATGGGAAAGCAT,ATGGGGAAGCAG,ATGGGGAAGGAT,ATGGGGAGGCAT,ATGGGGCAGCAT,ATGTGGAAGCAT	387	1,2,1,1,1,1,1,1
Lib10^2_#1 10 ng	ATTCGGGTTGTT	ATGCGGGTTGTT,ATTCGCGTTGTT,ATTCGGATTGTT,ATTCGGGTCGTT,ATTCGNGTTGTT	214	1,1,1,1,1
Lib10^2_#1 10 ng	ATTCGTTTTAGA	AATCGTTTTAGA,ATTCGGTTTAGA,ATTCGTTTAAGA,ATTCGTTTCAGA,ATTCGTTTTAGG,ATTCGTTTTAGT,ATTGGTTTTAGA	244	1,1,1,1,1,1,1
Lib10^2_#1 10 ng	ATTGATCTGATT	ATTGAGCTGATT,ATTGATCTGGTT,ATTGCTCTGATT,ATTGGTCTGATT,ATTGTTCTGATT	173	1,1,2,4,2
Lib10^2_#1 10 ng	CAAGAGGTGATC	CAAGAGATGATC,CAAGAGGAGATC,CAAGAGGTCATC,CAAGAGGTGATG,CAAGAGGTGGTC,CAAGGGGTGATC,CAAGTGGTGATC,CATGAGGTGATC,GAAGAGGTGATC	263	1,2,1,2,3,3,3,1,1
Lib10^2_#1 10 ng	CAGGCAATAAGG	TAGGCAATAAGG	269	1
Lib10^2_#1 10 ng	CAGGTGTTTGCC	CAGCTGTTTGCC,CAGGAGTTTGCC,CAGGGGTTTGCC,CAGGTGATTGCC,CAGGTGGTTGCC,CAGGTGTATGCC,CAGGTGTCTGCC,CAGGTGTNTGCC,CAGGTGTTTGGC,CCGGTGTTTGCC,CTGGTGTTTGCC,TAGGTGTTTGCC	394	1,3,2,1,1,2,2,1,1,1,3,1
Lib10^2_#1 10 ng	CAGTGTTTAACC	CAGGGTTTAACC	45	1
Lib10^2_#1 10 ng	CATCTGCCGATT	CAGCTGCCGATT,CATCTGCCGCTT,CATCTGCCGGTT,CATCTGCCGTTT,CATCTGCTGATT,CATGTGCCGATT,CATTTGCCGATT,CTTCTGCCGATT	305	1,1,1,1,1,1,1,1
Lib10^2_#1 10 ng	CCGGTCTTTTAC	CCGATCTTTTAC,CCGGGCTTTTAC,CCGGTCGTTTAC,CCGGTCTNTTAC,CCGGTCTTATAC,CCGGTCTTCTAC,CCGGTCTTTGAC,CCGGTCTTTTCC,CCGGTCTTTTGC,CCGGTGTTTTAC,CGGGTCTTTTAC,CNGGTCTTTTAC,CTGGTCTTTTAC,GCGGTCTTTTAC	356	1,2,1,1,2,2,1,1,1,1,1,1,1,1
Lib10^2_#1 10 ng	CCGGTTATTAGC	CCCGTTATTAGC,CCGGATATTAGC,CCGGTTATNAGC,CCGGTTATTAGA,CCGGTTATTAGG,CCGGTTATTTGC	189	1,1,1,1,1,3
Lib10^2_#1 10 ng	CCGTAACGTTTT	CCGGAACGTTTT,CCGTAACGTATT,CCGTAACGTCTT,CCGTAACGTGTT,CCGTAAGGTTTT,CCGTAANGTTTT,CCGTATCGTTTT,CCGTTACGTTTT,TCGTAACGTTTT	204	1,2,2,3,1,1,1,1,1
Lib10^2_#1 10 ng	CCTATTCGTTGT	CCTATTCGTTGG,CCTGTTCGTTGT,TCTATTCGTTGT	66	1,1,1
Lib10^2_#1 10 ng	CCTGTATCACAA	CCTGTACCACAA,CTTGTATCACAA	184	1,1
Lib10^2_#1 10 ng	CGCCGACATATA	CGCCGACNTATA,CGCCGGCATATA,CGCCGNCATATA,CGCCGTCATATA	46	1,1,1,2
Lib10^2_#1 10 ng	CGCCGGCCGGTT	CGCCGGCCGGGT,CTCCGGCCGGTT	81	1,1
Lib10^2_#1 10 ng	CGTTTGTTGTTA	CGTATGTTGTTA,CGTCTGTTGTTA,CGTTTCTTGTTA	164	1,3,1
Lib10^2_#1 10 ng	CGTTTTTTTCGT	CGTATTTTTCGT,CGTCTTTTTCGT,CGTGTTTTTCGT,CGTTTTATTCGT,CGTTTTCTTCGT,CGTTTTTCTCGT,CGTTTTTTACGT,CGTTTTTTGCGT,CGTTTTTTTCGA,TGTTTTTTTCGT	215	7,9,10,1,1,1,1,2,2,2
Lib10^2_#1 10 ng	CTAGGAGATGAG	CTAGCAGATGAG,CTAGGAGATGAT,CTAGGAGATGCG,CTAGGAGATGGG,CTAGGAGATGTG,CTAGGAGGTGAG,CTAGGAGTTGAG,CTAGGGGATGAG,CTAGGTGATGAG,CTAGTAGATGAG,CTTGGAGATGAG,TTAGGAGATGAG	365	1,1,3,10,10,1,1,1,2,1,1,1
Lib10^2_#1 10 ng	CTCAGCCTGAGA	CCCAGCCTGAGA,CTCAGCCTGGGA,CTCAGCCTGTGA,CTCGGCCTGAGA	149	1,2,1,1
Lib10^2_#1 10 ng	CTCCTTGTCTTG	CTCCTTGACTTG	62	1
Lib10^2_#1 10 ng	CTCGAACATAGG	CACGAACATAGG,CTCAAACATAGG,CTCGAACAAAGG,CTCGAACAGAGG,CTCGAACATAAG,CTCGAACATAGC,CTCGAAGATAGG,CTCGCACATAGG,CTCGGACATAGG,CTCGTACATAGG	315	1,1,1,1,1,1,1,4,2,4
Lib10^2_#1 10 ng	CTCGCGATGAGT	ATCGCGATGAGT,CGCGCGATGAGT,CTCGCGATGGGT,CTCGCGATGTGT,CTCGCGGTGAGT,CTCGCGTTGAGT	265	1,1,1,7,1,1
Lib10^2_#1 10 ng	CTCTTTTTTGAG	CTCTTTNTTGAG,CTCTTTTGTGAG,CTCTTTTNTGAG,CTCTTTTTTGAC,CTCTTTTTTGTG	299	1,1,1,1,25
Lib10^2_#1 10 ng	CTGCATATGAGC	CTGCATATGGGC,CTGGATATGAGC	215	2,1
Lib10^2_#1 10 ng	CTTACGTGAGAT	CTTACGTGACAT,CTTACGTGTGAT	119	1,2
Lib10^2_#1 10 ng	CTTATGTTTCAT	CCTATGTTTCAT,CTTATGGTTCAT,CTTATGTATCAT,CTTATGTTGCAT,CTTATGTTTCTT,CTTATGTTTTAT,TTTATGTTTCAT	315	1,1,1,1,1,2,1
Lib10^2_#1 10 ng	CTTCGTGCTGGG	ATTCGTGCTGGG,CTTCCTGCTGGG,CTTCGAGCTGGG,CTTTGTGCTGGG	372	1,1,1,1
Lib10^2_#1 10 ng	GAAAATAGACTG	GAAAATAGACTT,GAAAATAGCCTG,GAAAATAGTCTG,GTAAATAGACTG	115	1,1,1,2
Lib10^2_#1 10 ng	GACCTGGATGCC	GACCTGGATCCC,GACCTGGATGGC,GACCTGGCTGCC,GACCTGGGTGCC,GATCTGGATGCC,GCCCTGGATGCC,GTCCTGGATGCC	230	1,1,1,6,1,1,2
Lib10^2_#1 10 ng	GACTAGTTGGTT	GACTAGATGGTT,GACTAGGTGGTT,GACTAGTAGGTT,GACTAGTTGGAT,GACTAGTTGGGT,GACTAGTTGGTA,GACTAGTTGGTG,GAGTAGTTGGTT,GGCTAGTTGGTT	218	2,1,1,1,1,1,1,1,1
Lib10^2_#1 10 ng	GAGTGTGTATGC	GTGTGTGTATGC,TAGTGTGTATGC	236	2,1
Lib10^2_#1 10 ng	GATTTGGTAGTA	GATTTGCTAGTA,GATTTGGTAGGA,GGTTTGGTAGTA,GTTTTGGTAGTA	204	1,1,1,1
Lib10^2_#1 10 ng	GATTTTTTGCAA	CATTTTTTGCAA,GATATTTTGCAA,GATGTTTTGCAA,GATTATTTGCAA,GATTTTGTGCAA,GATTTTTGGCAA,GATTTTTTCCAA,GGTTTTTTGCAA,TATTTTTTGCAA	242	1,1,1,1,1,1,1,2,1
Lib10^2_#1 10 ng	GCCTTTGGTGTT	GCCCTTGGTGTT,GCCTTGGGTGTT,GCCTTTGGTCTT,GCCTTTGGTGTG,GCCTTTGTTGTT	302	1,2,1,1,1
Lib10^2_#1 10 ng	GCTGACTTTTCG	GCTGACTTTACG,GCTGGCTTTTCG	108	1,1
Lib10^2_#1 10 ng	GGAGTGGCCCAA	CGAGTGGCCCAA,GGAGGGGCCCAA	208	1,1
Lib10^2_#1 10 ng	GGATTGAGGAGC	GGAATGAGGAGC,GGATTGAGAAGC,GGATTGAGCAGC,GGATTGAGGAGG,GGATTGAGGAGT,GGATTGAGGATC,GGATTGAGGGGC,GGATTGAGGTGC,GGATTGGGGAGC,GGATTGTGGAGC,GGCTTGAGGAGC,GGTTTGAGGAGC	351	2,1,1,1,1,1,4,3,4,7,1,2
Lib10^2_#1 10 ng	GGCGTTAAATCT	GGCGATAAATCT,GGCGTAAAATCT,GGCGTCAAATCT	83	2,1,1
Lib10^2_#1 10 ng	GGCGTTCACTCT	GACGTTCACTCT,GGCGATCACTCT,GGCGCTCACTCT,GGCGTACACTCT,GGCGTCCACTCT,GGCGTGCACTCT,GGCGTTCACTCA,GGCGTTCACTGT	250	2,1,1,2,2,1,1,1
Lib10^2_#1 10 ng	GGGAAGTGGTTT	GAGAAGTGGTTT,GGGAAGAGGTTT,GGGAAGCGGTTT,GGGAAGTGGGTT,GGGAAGTGGTAT,GGGAAGTGGTGT,GGGAGGTGGTTT	190	1,1,1,1,1,1,1
Lib10^2_#1 10 ng	GGGGTGTATCGG	CGGGTGTATCGG,GCGGTGTATCGG,GGGGTGTATCGT,GGGGTGTATTGG	85	1,1,1,1
Lib10^2_#1 10 ng	GGTCGGGTTAGT	GGTCGGGCTAGT,GGTCGGGTAAGT,GGTCGTGTTAGT,GGTGGGGTTAGT	217	1,1,1,1
Lib10^2_#1 10 ng	GGTCTCTGGTTG		31
Lib10^2_#1 10 ng	GGTTGGCTACTA	GATTGGCTACTA,GGTAGGCTACTA,GGTTGGNTACTA,GGTTGNCTACTA	105	1,1,1,1
Lib10^2_#1 10 ng	GTACGGCACTGT	GAACGGCACTGT,GTACCGCACTGT,GTACGGCACTAT,GTACGGCACTGA,GTACGGCACTGC,GTACGGCACTGG,GTACGGCATTGT,GTACGGCNCTGT,GTACGGCTCTGT,GTACGGGACTGT,GTCCGGCACTGT	426	1,1,1,2,1,1,1,1,1,1,1
Lib10^2_#1 10 ng	GTACGGTGTTCA	GAACGGTGTTCA,GCACGGTGTTCA,GTACGGGGTTCA,GTACGGNGTTCA,GTACGGTGATCA,GTACGGTGGTCA,GTACGGTGTACA,GTACGGTGTCCA,GTTCGGTGTTCA	357	1,1,1,1,1,1,1,2,1
Lib10^2_#1 10 ng	GTCTGATACTGG	GACTGATACTGG,GGCTGATACTGG,GTCTGCTACTGG,GTCTGTTACTGG	86	1,1,2,1
Lib10^2_#1 10 ng	GTGAGCCGGGCT	GAGAGCCGGGCT,GGGAGCCGGGCT,GTGAGCCCGGCT,GTGAGCCGCGCT,GTGAGCCGGCCT,GTGAGCCGGGCG,GTGAGCCGGGGT,GTGAGCCTGGCT,GTGAGCTGGGCT,GTGGGCCGGGCT,GTGTGCCGGGCT	429	2,1,2,1,1,1,1,1,2,4,5
Lib10^2_#1 10 ng	GTGGCAGCTCTA	GAGGCAGCTCTA,GGGGCAGCTCTA,GTGGCAGATCTA,GTGGCAGCTCTC,GTGGCAGCTCTG,GTGGCAGCTGTA,GTGGCAGGTCTA,GTGGCAGTTCTA	298	2,1,4,1,1,1,8,1
Lib10^2_#1 10 ng	GTGTGGTTGGTT	GTGNGGTTGGTT,GTGTGATTGGTT,GTGTGGTTGATT,GTGTGGTTGGTG,GTGTGGTTTGTT	76	1,1,1,1,1
Lib10^2_#1 10 ng	GTGTTCTAGAGG	GAGTTCTAGAGG,GTGATCTAGAGG,GTGTACTAGAGG,GTGTTCTAGGGG,GTGTTCTAGTGG,GTGTTTTAGAGG	459	1,1,1,9,5,2
Lib10^2_#1 10 ng	GTTAGGCTGCAC	ATTAGGCTGCAC,CTTAGGCTGCAC,GGTAGGCTGCAC,GTCAGGCTGCAC,GTTAGGCAGCAC,GTTAGGCTGGAC,GTTAGNCTGCAC,GTTAGTCTGCAC	409	1,1,1,1,1,1,1,1
Lib10^2_#1 10 ng	GTTGCTAAACAT		25
Lib10^2_#1 10 ng	GTTTGTTGGCTC	GGTTGTTGGCTC,GTCTGTTGGCTC,GTTTCTTGGCTC,GTTTGATGGCTC,GTTTGGTGGCTC,GTTTGTTGGCAC,GTTTGTTGGTTC,GTTTGTTGTCTC	310	1,1,1,2,1,1,1,1
Lib10^2_#1 10 ng	GTTTTATTTCGT	GATTTATTTCGT,GTATTATTTCGT,GTTCTATTTCGT,GTTTTAGTTCGT,GTTTTANTTCGT,GTTTTATTTCGA	289	1,1,1,1,1,2
Lib10^2_#1 10 ng	GTTTTTTACTTG	CTTTTTTACTTG,GTCTTTTACTTG,GTGTTTTACTTG,GTTTTATACTTG,GTTTTTTGCTTG	170	1,1,1,1,1
Lib10^2_#1 10 ng	TAAGCTCTCAGT		19
Lib10^2_#1 10 ng	TAGTGGATTTAC	TAATGGATTTAC,TAGAGGATTTAC,TAGGGGATTTAC,TAGTGCATTTAC,TAGTGGATATAC,TAGTGGATTGAC,TAGTGGATTTAG,TAGTGGATTTCC,TAGTGGCTTTAC	345	1,1,1,1,1,1,1,1,1
Lib10^2_#1 10 ng	TATAAGATTGGG	TATAAAATTGGG,TATAACATTGGG,TATAAGAGTGGG,TATAAGATCGGG,TATAAGATTAGG,TATAAGATTGCG,TATAAGATTGGC,TATAAGATTGGT,TATAAGNTTGGG,TATAANATTGGG,TATNAGATTGGG,TTTAAGATTGGG	388	1,1,1,1,2,1,2,1,1,1,1,1
Lib10^2_#1 10 ng	TATCGATTATTC	TAGCGATTATTC,TATCGATTATCC	185	1,1
Lib10^2_#1 10 ng	TATTTATTCTCC	TATCTATTCTCC,TATTTAATCTCC,TATTTATACTCC,TATTTATCCTCC,TATTTATTCTAC,TATTTNTTCTCC,TATTTTTTCTCC,TGTTTATTCTCC	382	2,1,1,1,1,1,1,1
Lib10^2_#1 10 ng	TATTTTTAAGCG	CATTTTTAAGCG,TATTNTTAAGCG,TATTTGTAAGCG,TATTTNTAAGCG,TATTTTCAAGCG,TATTTTTAAGCC,TATTTTTAAGGG,TATTTTTATGCG	218	1,1,1,1,1,1,1,1
Lib10^2_#1 10 ng	TCAATCGGCGTG	CCAATCGGCGTG,TCAAACGGCGTG,TCAATCGGCGGG,TCAATCGGCGTC,TCAATCGGNGTG,TCAGTCGGCGTG	278	2,1,1,1,1,1
Lib10^2_#1 10 ng	TCCGTTTGCTTC	TCCGTCTGCTTC,TCCTTTTGCTTC	117	1,1
Lib10^2_#1 10 ng	TCGAACGTATTG	TCGAACGTAATG,TCGAACGTATTA	200	1,1
Lib10^2_#1 10 ng	TCGCCATGTGCT	TCACCATGTGCT,TCGCCAGGTGCT,TCGCCTTGTGCT,TCGCGATGTGCT	161	1,1,1,1
Lib10^2_#1 10 ng	TCGCCGTTGATT		18
Lib10^2_#1 10 ng	TCGCTGCTATTT	CCGCTGCTATTT,TAGCTGCTATTT,TCCCTGCTATTT,TCGCGGCTATTT,TCGCTCCTATTT,TCGCTGATATTT,TCGCTGCGATTT,TTGCTGCTATTT	340	1,1,1,1,1,2,1,3
Lib10^2_#1 10 ng	TCGTTTGTACTT	TCGATTGTACTT,TCGGTTGTACTT,TCGTTTGGACTT,TCGTTTGTAGTT	200	1,1,2,1
Lib10^2_#1 10 ng	TCTATTAAGGCT	GCTATTAAGGCT,TATATTAAGGCT,TCTATTAACGCT,TCTATTAAGGAT,TCTATTAAGGCN,TCTATTAGGGCT,TCTATTATGGCT,TCTATTGAGGCT,TCTATTTAGGCT	374	1,1,1,1,1,2,1,1,1
Lib10^2_#1 10 ng	TCTCGCAAGCAT	TATCGCAAGCAT,TCTCACAAGCAT,TCTCCCAAGCAT,TCTCGCACGCAT,TCTCGCANGCAT,TCTCGNAAGCAT,TCTCGTAAGCAT	305	1,1,1,1,1,1,1
Lib10^2_#1 10 ng	TCTGAACGATGT	TCCGAACGATGT,TCGGAACGATGT,TCTGAACGATAT,TCTGAACGGTGT,TCTGAACGTTGT,TCTGAAGGATGT,TCTGTACGATGT	277	1,1,1,2,2,1,5
Lib10^2_#1 10 ng	TGAGTTTATGTT	TGAGTTNATGTT,TGTGTTTATGTT	114	1,1
Lib10^2_#1 10 ng	TGATCTGTTGCC	TGACCTGTTGCC,TGATCGGTTGCC,TGATCTGCTGCC,TGATCTGGTGCC,TGATCTGTTGAC,TGATCTGTTGCT,TGATGTGTTGCC,TGCTCTGTTGCC,TGGTCTGTTGCC,TGTTCTGTTGCC	451	1,1,1,3,1,1,1,1,3,2
Lib10^2_#1 10 ng	TGCAGCCCGGGG	TGCACCCCGGGG,TGCAGCCCGAGG,TGCTGCCCGGGG	200	1,1,2
Lib10^2_#1 10 ng	TGCATCCAAGCT	GGCATCCAAGCT,TCCATCCAAGCT,TGCACCCAAGCT,TGCATCCAGGCT,TGCATCTAAGCT	204	1,1,1,2,1
Lib10^2_#1 10 ng	TGCTGTGGCTCA	TCCTGTGGCTCA,TGCNGTGGCTCA,TGCTGGGGCTCA,TGCTGTGGCACA,TGCTGTGGCCCA,TGCTGTGGCTCC	146	1,1,1,1,3,1
Lib10^2_#1 10 ng	TGGCCAGACTGG	TGGACAGACTGG,TGGCCACACTGG,TGGCCAGTCTGG,TGGCCCGACTGG,TGGGCAGACTGG	237	1,1,1,1,1
Lib10^2_#1 10 ng	TGGGGGGTAACG	TGAGGGGTAACG,TGGGGGGTAGCG,TGGGGTGTAACG	61	1,2,1
Lib10^2_#1 10 ng	TGGGGTCTAGCG	TGGAGTCTAGCG,TGGGGACTAGCG,TGGGGTCTAGGG,TGGNGTCTAGCG	86	1,1,1,1
Lib10^2_#1 10 ng	TGGTTTCCTTGG	AGGTTTCCTTGG,TGGATTCCTTGG,TGGTTTCATTGG,TGGTTTCCCTGG,TGGTTTCCTAGG,TGGTTTCCTTGA	253	1,2,1,1,1,1
Lib10^2_#1 10 ng	TGTAAGGCTGCG	TGGAAGGCTGCG,TGTAAGACTGCG,TGTAAGGCCGCG,TGTAAGGCTGGG,TGTACGGCTGCG,TGTATGGCTGCG	253	1,1,1,1,1,1
Lib10^2_#1 10 ng	TGTACTGAGGGA	TGGACTGAGGGA,TGTACNGAGGGA,TGTACTGAGCGA,TGTACTGAGGAA,TGTACTGAGGGC,TGTACTGAGGGG,TGTACTGGGGGA,TGTACTGTGGGA,TGTCCTGAGGGA,TTTACTGAGGGA	316	2,1,1,2,1,1,1,8,1,1
Lib10^2_#1 10 ng	TGTAGTGTGACA	TGAAGTGTGACA,TGCAGTGTGACA,TGGAGTGTGACA,TGTAGTGGGACA,TGTAGTGTCACA,TGTAGTGTGGCA,TGTAGTGTGTCA,TGTGGTGTGACA	352	1,1,1,1,1,5,1,1
Lib10^2_#1 10 ng	TGTCGTCTCTCG	CGTCGTCTCTCG,GGTCGTCTCTCG,TGACGTCTCTCG,TGTCGACTCTCG,TGTCGCCTCTCG,TGTCGTCACTCG,TGTCGTCNCTCG,TGTCGTCTCTGG,TTTCGTCTCTCG	402	1,1,3,1,1,1,1,1,1
Lib10^2_#1 10 ng	TGTGTCGCGGCC	GGTGTCGCGGCC,TGTGACGCGGCC,TGTGTCCCGGCC,TGTGTCGCAGCC,TGTGTCGCGTCC,TGTGTGGCGGCC	333	1,1,1,1,1,1
Lib10^2_#1 10 ng	TGTTGATCGTGT	TCTTGATCGTGT,TGTTGAGCGTGT,TGTTGATCGAGT,TGTTGATCGGGT,TGTTGATCGTCT,TGTTGATCGTGC,TGTTGATCGTGG,TGTTGATCTTGT,TGTTGGTCGTGT,TGTTGNTCGTGT,TGTTGTTCGTGT,TGTTTATCGTGT,TNTTGATCGTGT	349	1,1,1,4,1,1,1,1,3,1,1,1,1
Lib10^2_#1 10 ng	TTCGATTGACGC	TTCGAGTGACGC,TTCGATNGACGC,TTCGATTGACAC,TTCGATTGCCGC,TTCGATTGGCGC,TTCGATTGTCGC,TTCGATTNACGC,TTCGGTTGACGC	426	1,1,1,1,6,4,1,1
Lib10^2_#1 10 ng	TTCTATACATGG	TTCNATACATGG,TTCTATACATGT	177	1,1
Lib10^2_#1 10 ng	TTCTATATGTTT	TTCTATANGTTT,TTCTATATGGTT,TTCTATATGTTG	107	1,1,1
Lib10^2_#1 10 ng	TTGACCATAGGT	ATGACCATAGGT,TTGACAATAGGT,TTGACCATAGCT,TTGACCATAGGA,TTGACCATAGGG,TTGAGCATAGGT,TTGGCCATAGGT,TTGTCCATAGGT	224	1,1,1,1,1,1,2,2
Lib10^2_#1 10 ng	TTGAGTTATAAT	CTGAGTTATAAT,TAGAGTTATAAT,TTGAGNTATAAT,TTGAGTTATACT,TTGAGTTATGAT,TTGAGTTTTAAT,TTGTGTTATAAT	234	1,1,1,1,1,1,1
Lib10^2_#1 10 ng	TTGGATGCCTAG	TGGGATGCCTAG,TTGGATCCCTAG,TTGGATGCCAAG,TTGGATGCCGAG,TTGGATGCCTCG,TTGGATGCCTGG,TTGGATGCCTTG,TTGGATGGCTAG,TTGGCTGCCTAG,TTGGGTGCCTAG,TTGGTTGCCTAG	431	1,1,1,1,1,1,1,2,1,10,3
Lib10^2_#1 10 ng	TTGTAGTATCGG	TTGNAGTATCGG,TTGTAGAATCGG,TTGTAGGATCGG,TTGTAGTATCGA,TTGTTGTATCGG	255	1,1,1,1,1
Lib10^2_#1 10 ng	TTTCGTTTTTTT	TATCGTTTTTTT,TTTCGTTTTGTT	136	1,1
Lib10^2_#1 10 ng	TTTCTTTTGTCT	GTTCTTTTGTCT,TATCTTTTGTCT,TCTCTTTTGTCT,TTTCTTTTGGCT	418	2,1,1,1
Lib10^2_#1 10 ng	TTTTCTTCCGCT	ATTTCTTCCGCT,TTTTCTNCCGCT,TTTTGTTCCGCT	110	1,1,1
Lib10^2_#1 33 ng	AAATGTCTCGCG		21
Lib10^2_#1 33 ng	AACGCGGGTATC	AACGCGGATATC,AACGCGGCTATC,AACGCGGGAATC,AACGCGGGGATC,AACGCGGGTACC,AACGCGGGTAGC,AACGCGGGTATG,AACGCGGGTATT,AACGCGTGTATC,AACGCNGGTATC,AACGGGGGTATC,AACGTGGGTATC,AGCGCGGGTATC,ATCGCGGGTATC	581	1,1,1,4,1,1,1,1,1,1,1,2,3,1
Lib10^2_#1 33 ng	AAGGGCTTCGAC	AAGGGCNTCGAC,AAGGGCTTCCAC,AAGGGCTTCGAG,AAGGGCTTCGGC,AAGGGCTTCGTC,AGGGGCTTCGAC	387	1,1,1,1,4,1
Lib10^2_#1 33 ng	AATTTCTCTGAT	AATNTCTCTGAT,AATTTCTCTGAC,AATTTCTCTGGT,AATTTCTCTGTT	295	1,1,2,1
Lib10^2_#1 33 ng	ACCCATGTGAGG	ACCCATGTGGGG,ACCCATGTGTGG	39	1,1
Lib10^2_#1 33 ng	ACCGGAATCAAG	ACCGGAACCAAG,ACCGGAAGCAAG,ACCGGAATCAGG,ACCGGAATCATG,ACCGGAATCCAG,ACCGGAATCTAG,ACCGGAATGAAG,ACCGGGATCAAG,ACCGGTATCAAG,ATCGGAATCAAG	377	1,1,2,2,1,1,1,2,4,1
Lib10^2_#1 33 ng	ACTGGTGAGGAT	ACTGCTGAGGAT,ACTGGGGAGGAT,ACTGGTGAGGGT,ACTGGTGAGGTT,ACTGGTGTGGAT,ACTNGTGAGGAT,ATTGGTGAGGAT	365	1,1,1,2,1,1,1
Lib10^2_#1 33 ng	ACTTACTATGTT	ACTTACTATATT,ACTTACTATGGT,TCTTACTATGTT	132	1,2,2
Lib10^2_#1 33 ng	ACTTAGCCGCAC	ACTTAGCCACAC,ACTTGGCCGCAC	190	1,1
Lib10^2_#1 33 ng	AGCAATGGGGAT	AGCAATGGGGAC,ATCAATGGGGAT	31	1,1
Lib10^2_#1 33 ng	AGCTTGTTTATC	AACTTGTTTATC,AGCATGTTTATC,AGCCTGTTTATC,AGCTTGATTATC,AGCTTGTCTATC,AGCTTGTTGATC,AGCTTGTTTCTC,AGGTTGTTTATC,GGCTTGTTTATC	338	1,1,1,2,1,1,1,1,1
Lib10^2_#1 33 ng	AGGCTGGGGGTA	AGGCGGGGGGTA,AGGCTCGGGGTA,AGGCTGAGGGTA,AGGCTGCGGGTA,AGGCTGGGGGCA,AGGCTGGGGGGA,AGGCTGGGGGTG,AGGCTGGGGGTT,AGGCTGNGGGTA,AGGTTGGGGGTA,TGGCTGGGGGTA	302	1,1,1,1,1,1,1,1,1,1,1
Lib10^2_#1 33 ng	AGGGTCCGCGTC	AGGGTCCGCGTA	43	1
Lib10^2_#1 33 ng	AGTCAACTAGCC	TGTCAACTAGCC	63	1
Lib10^2_#1 33 ng	AGTCGGGACGGA	ACTCGGGACGGA,AGTCCGGACGGA,AGTCGAGACGGA,AGTCGCGACGGA,AGTCGGGACAGA,AGTCGGGACGAA,AGTCGGGACGGC,AGTCGGGACGGG,AGTCGGGACGGT,AGTCGGGGCGGA,AGTCGGGTCGGA,AGTCGNGACGGA,ATTCGGGACGGA	488	2,1,1,1,1,1,1,3,1,4,4,1,1
Lib10^2_#1 33 ng	AGTCTCTCGTGA	AGTCTCTCATGA,AGTCTCTCGGGA,AGTCTCTCGTGG,AGTCTCTCGTGT	269	1,1,1,1
Lib10^2_#1 33 ng	AGTGCATGGGGA	AGAGCATGGGGA,AGGGCATGGGGA,AGTGCAGGGGGA,AGTGCATGGGGG,AGTGCATNGGGA	133	1,2,1,1,1
Lib10^2_#1 33 ng	ATCAAATGCTTT	ATCAAATGCTTA,ATCAGATGCTTT	443	1,1
Lib10^2_#1 33 ng	ATCAATGGGTGG	ATCAATCGGTGG,ATCAATGGGAGG,ATCAATGGGGGG,ATCGATGGGTGG	250	1,2,1,1
Lib10^2_#1 33 ng	ATCGGTGAACCA	ATCGGAGAACCA,ATCGGTGAACCC,ATCGGTGACCCA,ATCGGTGCACCA,ATCGGTGGACCA,ATCGGTGTACCA,ATGGGTGAACCA,ATTGGTGAACCA,TTCGGTGAACCA	295	1,1,2,1,6,5,1,2,1
Lib10^2_#1 33 ng	ATGGGGAAGCAT	AAGGGGAAGCAT,ATGGGGAACCAT,ATGGGGAAGCTT,ATGGGGAAGTAT,ATGGGGAGGCAT,ATGGGGCAGCAT,ATGGGGGAGCAT,ATGGGTAAGCAT,ATGNGGAAGCAT	412	1,2,1,1,1,1,3,1,1
Lib10^2_#1 33 ng	ATTCGGGTTGTT	ACTCGGGTTGTT,ATTCAGGTTGTT,ATTCGGGTTGAT,GTTCGGGTTGTT	217	1,1,1,1
Lib10^2_#1 33 ng	ATTCGTTTTAGA	ACTCGTTTTAGA,ATTCGNTTTAGA,ATTCGTCTTAGA,ATTCGTTATAGA,ATTCGTTTCAGA,ATTCGTTTGAGA,ATTCGTTTTAGT	243	1,1,1,1,2,1,2
Lib10^2_#1 33 ng	ATTGATCTGATT	ATTGACCTGATT,ATTGATCTGTTT,ATTGATTTGATT,ATTGCTCTGATT,ATTGGTCTGATT,ATTGTTCTGATT	194	1,1,1,1,1,1
Lib10^2_#1 33 ng	CAAGAGGTGATC	CAAGACGTGATC,CAAGAGCTGATC,CAAGAGGTGACC,CAAGAGGTGGTC,CAAGAGGTGTTC,CAAGTGGTGATC,CACGAGGTGATC	302	1,1,1,3,1,1,1
Lib10^2_#1 33 ng	CAGGCAATAAGG	CAGACAATAAGG,CAGGCAANAAGG,CAGGCNATAAGG,CAGGGAATAAGG	246	1,2,1,1
Lib10^2_#1 33 ng	CAGGTGTTTGCC	CACGTGTTTGCC,CAGCTGTTTGCC,CAGGAGTTTGCC,CAGGTATTTGCC,CAGGTGTATGCC,CAGGTGTCTGCC,CAGGTGTTTCCC	432	1,2,1,1,2,1,1
Lib10^2_#1 33 ng	CAGTGTTTAACC	CAGTGGTTAACC,CAGTGTTTAATC	50	1,1
Lib10^2_#1 33 ng	CATCTGCCGATT	CATCTGACGATT,CATCTGCCAATT,CATCTGCCGGTT,CATCTGCCGTTT,CTTCTGCCGATT	370	1,1,1,1,1
Lib10^2_#1 33 ng	CCGGTCTTTTAC	CCCGTCTTTTAC,CCGGGCTTTTAC,CCGGTCTNTTAC,CCGGTCTTATAC,CCGGTCTTGTAC	421	1,1,1,2,1
Lib10^2_#1 33 ng	CCGGTTATTAGC	CCGGTCATTAGC,CCGGTGATTAGC,CCGGTTANTAGC	222	1,2,1
Lib10^2_#1 33 ng	CCGTAACGTTTT	CCCTAACGTTTT,CCGTAACGTATT,CCGTAACGTCTT,CCGTAACGTGTT,CCGTAAGGTTTT,CCGTAGCGTTTT	254	1,1,1,1,1,1
Lib10^2_#1 33 ng	CCTATTCGTTGT	CCTATACGTTGT,CCTATGCGTTGT,TCTATTCGTTGT	79	1,1,1
Lib10^2_#1 33 ng	CCTGTATCACAA	CCTGTATCACAT,CCTGTATCAGAA	190	1,1
Lib10^2_#1 33 ng	CGCCGACATATA	CGCCGACATGTA	50	1
Lib10^2_#1 33 ng	CGCCGGCCGGTT	CGCCGGCCAGTT,CGCCGGCCCGTT	74	1,1
Lib10^2_#1 33 ng	CGTTTGTTGTTA	CATTTGTTGTTA,CGATTGTTGTTA,CGGTTGTTGTTA,CGTATGTTGTTA,CGTCTGTTGTTA,CGTGTGTTGTTA,CGTTTGATGTTA,CGTTTGTNGTTA	215	1,1,1,2,4,2,1,1
Lib10^2_#1 33 ng	CGTTTTTTTCGT	CGATTTTTTCGT,CGGTTTTTTCGT,CGTATTTTTCGT,CGTCTTTTTCGT,CGTGTTTTTCGT	278	1,1,13,8,13
Lib10^2_#1 33 ng	CTAGGAGATGAG	CAAGGAGATGAG,CTAGGAGAGGAG,CTAGGAGATGCG,CTAGGAGATGGG,CTAGGAGATGTG,CTAGGCGATGAG,CTAGGGGATGAG,CTAGGTGATGAG	393	1,1,2,13,8,1,1,2
Lib10^2_#1 33 ng	CTCAGCCTGAGA	CTCAGCCTGAGG,CTCAGCCTGGGA,CTCAGCCTGTGA,CTCTGCCTGAGA,GTCAGCCTGAGA,TTCAGCCTGAGA	156	3,2,3,1,1,1
Lib10^2_#1 33 ng	CTCCTTGTCTTG		69
Lib10^2_#1 33 ng	CTCGAACATAGG	CTCGAACAAAGG,CTCGAANATAGG,CTCGCACATAGG,CTCGGACATAGG,CTCGTACATAGG,CTGGAACATAGG	375	1,1,2,1,1,1
Lib10^2_#1 33 ng	CTCGCGATGAGT	CACGCGATGAGT,CTCACGATGAGT,CTCGCCATGAGT,CTCGCGATGAGG,CTCGCGATGGGT,CTCGCGATGTGT,CTCGCGTTGAGT,CTCGCNATGAGT,CTCGTGATGAGT	283	1,2,1,1,2,3,1,1,1
Lib10^2_#1 33 ng	CTCTTTTTTGAG	CTCATTTTTGAG,CTCNTTTTTGAG,CTCTTNTTTGAG,CTCTTTNTTGAG,CTCTTTTTTGGG	329	2,1,2,1,27
Lib10^2_#1 33 ng	CTGCATATGAGC	CTGCATAGGAGC,CTGCATATCAGC,CTGCATATGTGC	222	1,1,3
Lib10^2_#1 33 ng	CTTACGTGAGAT	CTTACGTGTGAT	128	3
Lib10^2_#1 33 ng	CTTATGTTTCAT	CCTATGTTTCAT,CTTATGGTTCAT,CTTATGTTTCGT	311	1,1,1
Lib10^2_#1 33 ng	CTTCGTGCTGGG	CATCGTGCTGGG,CTTCGAGCTGGG,CTTCGGGCTGGG,CTTCGTGCTAGG,CTTCGTGGTGGG	371	1,1,2,1,1
Lib10^2_#1 33 ng	GAAAATAGACTG	GAAAAGAGACTG,GAAAATAGGCTG,GAAAATGGACTG,GGAAATAGACTG	129	1,1,1,1
Lib10^2_#1 33 ng	GACCTGGATGCC	GAACTGGATGCC,GACCTGGATACC,GACCTGGATGCT,GACCTGGCTGCC,GACCTGGGTGCC,GACCTGGTTGCC,GTCCTGGATGCC	281	1,1,1,1,5,2,2
Lib10^2_#1 33 ng	GACTAGTTGGTT	GACCAGTTGGTT,GACTAGTTGGGT,GACTATTTGGTT,GGCTAGTTGGTT	263	1,1,1,1
Lib10^2_#1 33 ng	GAGTGTGTATGC	CAGTGTGTATGC,GAGGGTGTATGC,GAGTGTCTATGC,GAGTGTGTATGT,GCGTGTGTATGC,GGGTGTGTATGC,GTGTGTGTATGC	243	1,1,1,1,1,1,1
Lib10^2_#1 33 ng	GATTTGGTAGTA	GATTTGGTAGCA,GATTTGGTAGTG	252	1,2
Lib10^2_#1 33 ng	GATTTTTTGCAA	GATGTTTTGCAA,GATTTATTGCAA,GATTTTGTGCAA,GATTTTTTGCCA,GTTTTTTTGCAA,TATTTTTTGCAA	256	1,1,1,1,1,1
Lib10^2_#1 33 ng	GCCTTTGGTGTT	GCATTTGGTGTT,GCCTTGGGTGTT	302	1,1
Lib10^2_#1 33 ng	GCTGACTTTTCG	GCTGACTTATCG,GCTGACTTTTCA,GCTNACTTTTCG	127	1,1,1
Lib10^2_#1 33 ng	GGAGTGGCCCAA	GCAGTGGCCCAA,GGAGTGCCCCAA,GGAGTGGCGCAA,GGAGTGGTCCAA,GGTGTGGCCCAA	230	1,1,1,1,2
Lib10^2_#1 33 ng	GGATTGAGGAGC	GAATTGAGGAGC,GGATTGAGGGGC,GGATTGAGGTGC,GGATTGAGTAGC,GGATTGGGGAGC,GGATTGTGGAGC,GGGTTGAGGAGC,GGTTTGAGGAGC,GTATTGAGGAGC	325	1,2,2,1,3,4,1,1,1
Lib10^2_#1 33 ng	GGCGTTAAATCT	GGCGTAAAATCT,GGCGTGAAATCT,GGCGTTAAATCC,GTCGTTAAATCT	73	1,2,1,1
Lib10^2_#1 33 ng	GGCGTTCACTCT	GGCGATCACTCT,GGCGTACACTCT,GGCGTGCACTCT,GGCGTTCACCCT,GGCGTTCATTCT,GGCGTTCGCTCT,GGTGTTCACTCT,GTCGTTCACTCT	283	1,1,1,1,1,1,1,1
Lib10^2_#1 33 ng	GGGAAGTGGTTT	GGCAAGTGGTTT,GGGAAGTGGGTT,GGGAAGTGGTGT,GGGAAGTGTTTT,GTGAAGTGGTTT	242	3,1,1,1,1
Lib10^2_#1 33 ng	GGGGTGTATCGG	GGAGTGTATCGG,GGGGGGTATCGG	99	1,1
Lib10^2_#1 33 ng	GGTCGGGTTAGT	GGTCCGGTTAGT,GGTCGGGGTAGT,GGTCGGGTAAGT,GGTCGGGTGAGT,GGTCGGGTTATT,GGTCGNGTTAGT,GGTGGGGTTAGT	226	2,1,1,1,1,1,1
Lib10^2_#1 33 ng	GGTCTCTGGTTG		36
Lib10^2_#1 33 ng	GGTTGGCTACTA	GGTCGGCTACTA,GGTTGCCTACTA,GGTTGGCAACTA,GGTTGGCNACTA,GGTTGGCTACTC,GGTTGNCTACTA	126	1,1,1,1,1,1
Lib10^2_#1 33 ng	GTACGGCACTGT	GGACGGCACTGT,GTACGCCACTGT,GTACGGCACTAT,GTACGGCACTGG,GTACGGCNCTGT	446	1,1,1,1,1
Lib10^2_#1 33 ng	GTACGGTGTTCA	GTACGGTGTCCA,GTCCGGTGTTCA,GTGCGGTGTTCA	423	1,1,1
Lib10^2_#1 33 ng	GTCTGATACTGG	GTCTGATCCTGG,GTCTGGTACTGG	98	1,2
Lib10^2_#1 33 ng	GTGAGCCGGGCT	GAGAGCCGGGCT,GTAAGCCGGGCT,GTGAGACGGGCT,GTGAGCCGAGCT,GTGAGCCGCGCT,GTGAGCCGGCCT,GTGAGCCGGGCA,GTGAGCCTGGCT,GTGGGCCGGGCT,GTGTGCCGGGCT	478	3,1,1,1,1,1,1,1,9,4
Lib10^2_#1 33 ng	GTGGCAGCTCTA	GCGGCAGCTCTA,GGGGCAGCTCTA,GTGGCAGATCTA,GTGGCAGCGCTA,GTGGCAGCTCTC,GTGGCAGGTCTA,GTGGCAGTTCTA,GTGGGAGCTCTA	312	1,1,8,1,1,11,3,1
Lib10^2_#1 33 ng	GTGTGGTTGGTT	GTGGGGTTGGTT,GTGTGGATGGTT	99	1,1
Lib10^2_#1 33 ng	GTGTTCTAGAGG	GTGGTCTAGAGG,GTGTCCTAGAGG,GTGTTCTAGAGC,GTGTTCTAGGGG,GTGTTCTAGTGG	487	1,2,1,6,8
Lib10^2_#1 33 ng	GTTAGGCTGCAC	GATAGGCTGCAC,GCTAGGCTGCAC,GGTAGGCTGCAC,GTTAGCCTGCAC,GTTAGGATGCAC,GTTAGGCTGCTC,GTTAGTCTGCAC,GTTANGCTGCAC,GTTGGGCTGCAC	446	2,1,1,1,2,1,1,1,1
Lib10^2_#1 33 ng	GTTTGTTGGCTC	GATTGTTGGCTC,GTTTGATGGCTC,GTTTGGTGGCTC,GTTTGTAGGCTC,GTTTGTTGACTC,GTTTGTTGGCGC,GTTTGTTGTCTC	323	3,3,2,1,1,1,2
Lib10^2_#1 33 ng	GTTTTATTTCGT	GGTTTATTTCGT,GTCTTATTTCGT,GTGTTATTTCGT,GTTTTATTCCGT,GTTTTATTTAGT,GTTTTATTTCAT,GTTTTATTTCGA,GTTTTATTTCTT	354	1,1,1,1,1,1,1,1
Lib10^2_#1 33 ng	GTTTTTTACTTG	GCTTTTTACTTG,GTTTTATACTTG,GTTTTCTACTTG,GTTTTTTACTGG,GTTTTTTACTTC	206	1,1,1,1,1
Lib10^2_#1 33 ng	TAAGCTCTCAGT		43
Lib10^2_#1 33 ng	TAGTGGATTTAC	TAGAGGATTTAC,TAGGGGATTTAC,TAGTGAATTTAC,TAGTGCATTTAC,TAGTGGATATAC,TAGTGGATCTAC,TAGTGGATGTAC,TAGTGGATTCAC,TAGTGGATTTAG,TAGTGGTTTTAC,TAGTGTATTTAC	411	1,1,2,1,1,1,1,1,1,1,1
Lib10^2_#1 33 ng	TATAAGATTGGG	CATAAGATTGGG,TATAAGATGGGG,TATAAGATTGCG,TATAAGATTGGC,TATAAGGTTGGG,TATAAGTTTGGG	377	1,1,1,2,1,2
Lib10^2_#1 33 ng	TATCGATTATTC	CATCGATTATTC,TATCGATTATGC	195	1,1
Lib10^2_#1 33 ng	TATTTATTCTCC	TAATTATTCTCC,TATATATTCTCC,TATTGATTCTCC,TATTTATTCTCT,TATTTTTTCTCC,TCTTTATTCTCC,TTTTTATTCTCC	447	1,1,1,1,1,1,2
Lib10^2_#1 33 ng	TATTTTTAAGCG	AATTTTTAAGCG,TATTTNTAAGCG,TATTTTNAAGCG,TATTTTTAGGCG,TTTTTTTAAGCG	257	1,1,1,1,1
Lib10^2_#1 33 ng	TCAATCGGCGTG	ACAATCGGCGTG,TCAATCCGCGTG,TCAATCGCCGTG,TCAATCGGCGTA,TCAATTGGCGTG	267	2,1,1,1,1
Lib10^2_#1 33 ng	TCCGTTTGCTTC	TCCGATTGCTTC,TCCGTCTGCTTC	126	1,1
Lib10^2_#1 33 ng	TCGAACGTATTG	TAGAACGTATTG,TCGAACGGATTG,TCGGACGTATTG	221	1,1,1
Lib10^2_#1 33 ng	TCGCCATGTGCT	ACGCCATGTGCT,TCGCCATGTTCT	172	1,1
Lib10^2_#1 33 ng	TCGCCGTTGATT		25
Lib10^2_#1 33 ng	TCGCTGCTATTT	CCGCTGCTATTT,TCGCTGCNATTT,TCGCTGTTATTT	469	2,1,1
Lib10^2_#1 33 ng	TCGTTTGTACTT	TCGATTGTACTT,TCGTATGTACTT,TCGTTTATACTT,TCGTTTGGACTT	214	1,2,1,1
Lib10^2_#1 33 ng	TCTATTAAGGCT	GCTATTAAGGCT,TCAATTAAGGCT,TCTATTAAGACT,TCTATTAAGGGT,TCTATTAAGTCT,TCTATTACGGCT,TCTATTAGGGCT,TCTATTATGGCT,TCTATTGAGGCT,TGTATTAAGGCT	432	1,1,2,1,1,1,2,2,1,2
Lib10^2_#1 33 ng	TCTCGCAAGCAT	ACTCGCAAGCAT,TCACGCAAGCAT,TCTCACAAGCAT,TCTCCCAAGCAT,TCTCGAAAGCAT,TCTCGCAAGCAA,TCTCGCAAGTAT,TCTCGTAAGCAT,TGTCGCAAGCAT	306	1,2,1,1,1,1,1,1,1
Lib10^2_#1 33 ng	TCTGAACGATGT	ACTGAACGATGT,TCTCAACGATGT,TCTGAACGAGGT,TCTGAACGGTGT,TCTGACCGATGT,TCTGATCGATGT,TCTGCACGATGT,TCTGGACGATGT	326	1,1,1,1,1,1,1,3
Lib10^2_#1 33 ng	TGAGTTTATGTT	TGAGTTTATGCT,TGGGTTTATGTT,TGTGTTTATGTT	134	1,1,1
Lib10^2_#1 33 ng	TGATCTGTTGCC	TAATCTGTTGCC,TGATCGGTTGCC,TGATCTGGTGCC,TGATCTGNTGCC,TGATCTGTGGCC,TGCTCTGTTGCC,TGGTCTGTTGCC	425	1,1,1,1,1,2,4
Lib10^2_#1 33 ng	TGCAGCCCGGGG	TCCAGCCCGGGG,TGCAGCCCGGGC,TGCAGCTCGGGG,TGCTGCCCGGGG	229	1,2,1,2
Lib10^2_#1 33 ng	TGCATCCAAGCT	TGCTTCCAAGCT,TTCATCCAAGCT	224	1,1
Lib10^2_#1 33 ng	TGCTGTGGCTCA	GGCTGTGGCTCA,TGCTGTGNCTCA,TGCTGTGTCTCA	144	1,1,1
Lib10^2_#1 33 ng	TGGCCAGACTGG	TGGCCAGACAGG,TGGCCAGCCTGG,TGGCCAGTCTGG,TGGCCCGACTGG,TGGCCTGACTGG	250	1,2,1,1,1
Lib10^2_#1 33 ng	TGGGGGGTAACG	GGGGGGGTAACG	70	1
Lib10^2_#1 33 ng	TGGGGTCTAGCG	TGGCGTCTAGCG,TGGGGNCTAGCG	85	1,1
Lib10^2_#1 33 ng	TGGTTTCCTTGG	TGGGTTCCTTGG,TGGTTTCCTTGA	275	1,1
Lib10^2_#1 33 ng	TGTAAGGCTGCG	TGTAACGCTGCG,TGTATGGCTGCG	260	1,1
Lib10^2_#1 33 ng	TGTACTGAGGGA	TGGACTGAGGGA,TGTACNGAGGGA,TGTACTGAGGGG,TGTACTGATGGA,TGTACTGGGGGA,TGTACTGTGGGA,TGTACTNAGGGA	351	3,1,3,1,3,2,1
Lib10^2_#1 33 ng	TGTAGTGTGACA	AGTAGTGTGACA,TGAAGTGTGACA,TGGAGTGTGACA,TGTAGTGAGACA,TGTAGTGTGTCA	372	1,1,1,1,1
Lib10^2_#1 33 ng	TGTCGTCTCTCG	TGACGTCTCTCG,TGCCGTCTCTCG,TGGCGTCTCTCG,TGTCCTCTCTCG,TGTCGNCTCTCG,TGTCGTCCCTCG,TGTCGTCGCTCG,TGTCGTCTCACG,TGTCGTTTCTCG	475	2,1,1,1,1,1,1,1,1
Lib10^2_#1 33 ng	TGTGTCGCGGCC	TGAGTCGCGGCC,TGTGGCGCGGCC,TGTGTCGCGACC	352	1,1,1
Lib10^2_#1 33 ng	TGTTGATCGTGT	TGCTGATCGTGT,TGGTGATCGTGT,TGTAGATCGTGT,TGTGGATCGTGT,TGTTGATCATGT,TGTTGATCGAGT,TGTTGGTCGTGT,TGTTGTTCGTGT	413	1,1,2,1,1,1,2,3
Lib10^2_#1 33 ng	TTCGATTGACGC	TGCGATTGACGC,TTCGATTGACCC,TTCGATTGACGA,TTCGATTGACTC,TTCGATTGATGC,TTCGATTGGCGC,TTCGATTGTCGC,TTCGGTTGACGC,TTCGTTTGACGC	439	1,2,1,1,1,4,7,2,1
Lib10^2_#1 33 ng	TTCTATACATGG	TTCAATACATGG	204	1
Lib10^2_#1 33 ng	TTCTATATGTTT		103
Lib10^2_#1 33 ng	TTGACCATAGGT	TTGACCANAGGT,TTGACCATTGGT,TTGGCCATAGGT,TTGTCCATAGGT	254	1,1,2,3
Lib10^2_#1 33 ng	TTGAGTTATAAT	CTGAGTTATAAT,TTGAGTGATAAT,TTGAGTNATAAT,TTGAGTTATAAA,TTGAGTTATAGT,TTGTGTTATAAT	264	1,1,1,1,1,3
Lib10^2_#1 33 ng	TTGGATGCCTAG	ATGGATGCCTAG,TTGAATGCCTAG,TTGGAAGCCTAG,TTGGANGCCTAG,TTGGATGCCTAA,TTGGATGCCTTG,TTGGATGGCTAG,TTGGCTGCCTAG,TTGGGTGCCTAG,TTGGTTGCCTAG	492	1,2,2,1,1,1,1,1,6,2
Lib10^2_#1 33 ng	TTGTAGTATCGG	TTGTAGNATCGG,TTGTAGTAACGG,TTGTGGTATCGG	277	1,1,1
Lib10^2_#1 33 ng	TTTCGTTTTTTT	TTCCGTTTTTTT,TTTCGTATTTTT,TTTCGTGTTTTT,TTTCGTTTTTTA	135	1,1,1,1
Lib10^2_#1 33 ng	TTTCTTTTGTCT	GTTCTTTTGTCT,TATCTTTTGTCT,TCTCTTTTGTCT,TTCCTTTTGTCT,TTTATTTTGTCT,TTTCTTTTGACT,TTTTTTTTGTCT	468	1,2,1,2,1,1,1
Lib10^2_#1 33 ng	TTTTCTTCCGCT	ATTTCTTCCGCT,TTCTCTTCCGCT,TTTTCTTNCGCT	125	1,1,1
Lib10^2_#1 100 ng	AAATGTCTCGCG		19
Lib10^2_#1 100 ng	AACGCGGGTATC	AACCCGGGTATC,AACGCAGGTATC,AACGCGCGTATC,AACGCGGGGATC,AACGCGGGTAAC,AACGCGGGTTTC,AACGCGGNTATC,AACGGGGGTATC,AAGGCGGGTATC,CACGCGGGTATC	385	1,1,1,1,1,1,1,1,1,1
Lib10^2_#1 100 ng	AAGGGCTTCGAC	AAGAGCTTCGAC,AAGGGCGTCGAC,AAGGGCTTCAAC,AAGGGCTTCGGC,AAGGGCTTCGTC	282	1,1,1,1,2
Lib10^2_#1 100 ng	AATTTCTCTGAT	AATTTCGCTGAT,AATTTCTCTGGT,AATTTCTCTTAT	226	1,3,1
Lib10^2_#1 100 ng	ACCCATGTGAGG		24
Lib10^2_#1 100 ng	ACCGGAATCAAG	AACGGAATCAAG,ACCAGAATCAAG,ACCGGAANCAAG,ACCGGAATCAGG,ACCGGANTCAAG,ACCGGGATCAAG,ATCGGAATCAAG	259	1,1,1,1,1,1,1
Lib10^2_#1 100 ng	ACTGGTGAGGAT	ACTGGTGAGCAT,ACTGGTGAGGGT,ACTGGTGAGGTT,ATTGGTGAGGAT	239	1,3,3,1
Lib10^2_#1 100 ng	ACTTACTATGTT	ACTCACTATGTT	88	1
Lib10^2_#1 100 ng	ACTTAGCCGCAC	AGTTAGCCGCAC	120	1
Lib10^2_#1 100 ng	AGCAATGGGGAT	AGCAATGGGGGT	20	1
Lib10^2_#1 100 ng	AGCTTGTTTATC	AGATTGTTTATC,AGCATGTTTATC,AGCTTGATTATC,AGCTTGGTTATC,AGCTTGTTTACC,AGCTTGTTTAGC	229	1,1,1,6,1,1
Lib10^2_#1 100 ng	AGGCTGGGGGTA	AGGCTGAGGGTA,AGGCTGGGGATA,AGGCTGGGGGAA,AGGCTGGGGGGA,AGGCTGGGTGTA,AGGCTGGNGGTA	223	1,1,1,4,2,1
Lib10^2_#1 100 ng	AGGGTCCGCGTC		35
Lib10^2_#1 100 ng	AGTCAACTAGCC	AGTCAACTTGCC	43	1
Lib10^2_#1 100 ng	AGTCGGGACGGA	AGCCGGGACGGA,AGTCGGGACCGA,AGTCGGGACGGG,AGTCGGGACGGT,AGTCGGGACGTA,AGTCGGGGCGGA,AGTCGGGTCGGA,AGTNGGGACGGA	325	1,1,4,2,1,1,2,1
Lib10^2_#1 100 ng	AGTCTCTCGTGA	AGTCTCTCGAGA,AGTCTCTCGGGA,AGTCTCTCGTGC,AGTCTCTCGTGG,AGTCTCTCGTGT,AGTCTCTTGTGA,TGTCTCTCGTGA	199	1,1,1,2,1,1,1
Lib10^2_#1 100 ng	AGTGCATGGGGA	AGGGCATGGGGA,AGTGCATGGGGG	111	3,1
Lib10^2_#1 100 ng	ATCAAATGCTTT	ACCAAATGCTTT,ATCAAAAGCTTT,ATCAAATCCTTT,ATCAAATGATTT,ATCAAATGGTTT,ATCAAATGTTTT,ATCATATGCTTT,ATTAAATGCTTT,GTCAAATGCTTT	306	1,1,1,1,1,1,1,1,1
Lib10^2_#1 100 ng	ATCAATGGGTGG	ATCAAGGGGTGG,ATCAATAGGTGG,ATCAATGGGAGG,ATCAATGGGGGG,ATCAATGGGTGC	201	1,1,1,2,1
Lib10^2_#1 100 ng	ATCGGTGAACCA	AACGGTGAACCA,ATCGCTGAACCA,ATCGGTGGACCA,ATCGGTGTACCA,ATTGGTGAACCA,TTCGGTGAACCA	203	1,1,3,1,2,1
Lib10^2_#1 100 ng	ATGGGGAAGCAT	ATGCGGAAGCAT,ATGGAGAAGCAT,ATGGGGTAGCAT,ATGGGTAAGCAT	332	1,1,3,1
Lib10^2_#1 100 ng	ATTCGGGTTGTT	ACTCGGGTTGTT,ATTCGGGTTGGT	173	1,2
Lib10^2_#1 100 ng	ATTCGTTTTAGA	ATACGTTTTAGA,ATTCGATTTAGA,TTTCGTTTTAGA	163	2,1,1
Lib10^2_#1 100 ng	ATTGATCTGATT	ATTGATATGATT,ATTGATCTGGTT,ATTGATCTGTTT,ATTGCTCTGATT,ATTGGTCTGATT,ATTGTTCTGATT	134	1,2,1,1,3,2
Lib10^2_#1 100 ng	CAAGAGGTGATC	CAAGAGATGATC,CAAGAGGGGATC,CAAGAGGTGACC,CAAGAGGTGATT,CAAGAGGTGCTC,CAAGAGGTGGTC,CAAGAGNTGATC,CAAGATGTGATC,CAGGAGGTGATC,CTAGAGGTGATC	229	1,1,1,1,1,1,1,1,1,1
Lib10^2_#1 100 ng	CAGGCAATAAGG	CACGCAATAAGG,CAGGCAATAAGA,CCGGCAATAAGG	173	1,1,1
Lib10^2_#1 100 ng	CAGGTGTTTGCC	CAGATGTTTGCC,CAGGAGTTTGCC,CAGGTGCTTGCC,CAGGTGTATGCC,CAGGTGTGTGCC,CAGGTGTTTGCG,CAGGTGTTTGGC	275	1,1,1,1,1,1,1
Lib10^2_#1 100 ng	CAGTGTTTAACC		37
Lib10^2_#1 100 ng	CATCTGCCGATT	CATCTGCCGCTT,CATCTGCCGGTT	218	1,2
Lib10^2_#1 100 ng	CCGGTCTTTTAC	CCGGACTTTTAC,CCGGTCTTATAC,CCGGTCTTTGAC,CCGGTCTTTTCC	297	1,1,1,1
Lib10^2_#1 100 ng	CCGGTTATTAGC	ACGGTTATTAGC,CCCGTTATTAGC,CCGGTTATAAGC,CCGGTTATTATC,GCGGTTATTAGC	154	1,1,1,1,1
Lib10^2_#1 100 ng	CCGTAACGTTTT	CCGGAACGTTTT,CCGTAACGTTTG,CCGTATCGTTTT,CGGTAACGTTTT	162	1,1,1,1
Lib10^2_#1 100 ng	CCTATTCGTTGT	CCTATTCGTTCT,CCTATTCGTTGA	73	1,1
Lib10^2_#1 100 ng	CCTGTATCACAA	CCTGTATCCCAA	144	1
Lib10^2_#1 100 ng	CGCCGACATATA	CGCCGCCATATA	28	1
Lib10^2_#1 100 ng	CGCCGGCCGGTT	CGCCGGCCGGAT,CGCCGGCCGGGT,CGCCGGCCGGTC,CGCCGGCCGGTG	63	1,1,1,1
Lib10^2_#1 100 ng	CGTTTGTTGTTA	CGTATGTTGTTA,CGTCTGTTGTTA,CGTGTGTTGTTA,CGTTTGATGTTA,TGTTTGTTGTTA	151	4,1,1,1,1
Lib10^2_#1 100 ng	CGTTTTTTTCGT	AGTTTTTTTCGT,CGTATTTTTCGT,CGTCTTTTTCGT,CGTGTTTTTCGT,CGTTTATTTCGT,CTTTTTTTTCGT	184	1,7,7,9,1,1
Lib10^2_#1 100 ng	CTAGGAGATGAG	CTAGCAGATGAG,CTAGGAGATCAG,CTAGGAGATGAC,CTAGGAGATGCG,CTAGGAGATGGG,CTAGGAGATGTG,CTAGGAGGTGAG,CTAGGAGTTGAG,CTAGGGGATGAG,CTAGGTGATGAG,GTAGGAGATGAG	275	1,1,1,2,6,10,1,1,2,1,1
Lib10^2_#1 100 ng	CTCAGCCTGAGA	CTCAGCCTGAGG,CTCAGCCTGAGT,CTCAGCCTGCGA,CTCAGCCTGGGA,TTCAGCCTGAGA	113	1,2,1,2,1
Lib10^2_#1 100 ng	CTCCTTGTCTTG	CCCCTTGTCTTG	53	1
Lib10^2_#1 100 ng	CTCGAACATAGG	CTCGAACATCGG,CTCGAACATTGG,CTCGGACATAGG,CTCGTACATAGG	248	1,1,4,1
Lib10^2_#1 100 ng	CTCGCGATGAGT	CTCGCGATGGGT,CTCGCGATGTGT,CTCGCGGTGAGT	193	3,3,1
Lib10^2_#1 100 ng	CTCTTTTTTGAG	CNCTTTTTTGAG,CTCTTTNTTGAG,CTCTTTTGTGAG,CTCTTTTTTGAT,CTCTTTTTTGTG	245	1,1,1,1,13
Lib10^2_#1 100 ng	CTGCATATGAGC	CTGCATATAAGC,CTGCATATGGGC,CTGCATCTGAGC	164	1,1,1
Lib10^2_#1 100 ng	CTTACGTGAGAT	CTTACGTGAAAT,CTTACGTGAGCT,CTTACGTGAGGT	100	1,1,1
Lib10^2_#1 100 ng	CTTATGTTTCAT	CTTATGTTCCAT	207	1
Lib10^2_#1 100 ng	CTTCGTGCTGGG	CTTCGNGCTGGG	273	1
Lib10^2_#1 100 ng	GAAAATAGACTG		89
Lib10^2_#1 100 ng	GACCTGGATGCC	GACCCGGATGCC,GACCTGGAGGCC,GACCTGGATGCA,GACCTGGCTGCC,GACCTGGGTGCC,GACCTGGTTGCC,GATCTGGATGCC,GGCCTGGATGCC,GTCCTGGATGCC	193	1,1,1,3,2,2,1,2,1
Lib10^2_#1 100 ng	GACTAGTTGGTT	GACTAGATGGTT,GACTAGTTGGAT,GACTAGTTGGCT,GACTAGTTGGGT,GACTTGTTGGTT,GCCTAGTTGGTT,GGCTAGTTGGTT	165	1,1,2,1,2,2,1
Lib10^2_#1 100 ng	GAGTGTGTATGC	GAGGGTGTATGC,GAGTGTGNATGC,GAGTGTGTTTGC,GCGTGTGTATGC,GGGTGTGTATGC,GTGTGTGTATGC	169	1,1,1,1,1,4
Lib10^2_#1 100 ng	GATTTGGTAGTA	CATTTGGTAGTA,GATCTGGTAGTA,GATTTGATAGTA,GATTTGGTATTA	175	1,1,1,1
Lib10^2_#1 100 ng	GATTTTTTGCAA	GAGTTTTTGCAA,GATTTTCTGCAA,GATTTTTTCCAA,GGTTTTTTGCAA	160	1,1,1,1
Lib10^2_#1 100 ng	GCCTTTGGTGTT	GCCTTTGATGTT,GCCTTTGNTGTT,GCCTTTNGTGTT,GCGTTTGGTGTT	223	1,1,1,1
Lib10^2_#1 100 ng	GCTGACTTTTCG	GCTGANTTTTCG,GCTGGCTTTTCG,GCTGTCTTTTCG	76	1,1,1
Lib10^2_#1 100 ng	GGAGTGGCCCAA		143
Lib10^2_#1 100 ng	GGATTGAGGAGC	AGATTGAGGAGC,GGACTGAGGAGC,GGATTGAGCAGC,GGATTGAGGGGC,GGATTGAGGTGC,GGATTGGGGAGC,GGATTGNGGAGC,GGATTGTGGAGC,GGGTTGAGGAGC	300	1,1,1,2,4,4,2,4,1
Lib10^2_#1 100 ng	GGCGTTAAATCT	GGCGTCAAATCT	44	1
Lib10^2_#1 100 ng	GGCGTTCACTCT	GGCGTACACTCT	174	3
Lib10^2_#1 100 ng	GGGAAGTGGTTT	GCGAAGTGGTTT,GGGAAGAGGTTT,GGGAAGGGGTTT,GGGAAGTGGGTT,GGGAAGTGGTCT,GGGAAGTGGTTC	152	2,1,1,2,1,1
Lib10^2_#1 100 ng	GGGGTGTATCGG		71
Lib10^2_#1 100 ng	GGTCGGGTTAGT	GGACGGGTTAGT,GGCCGGGTTAGT,GGTCGGCTTAGT,GGTCGGGCTAGT,GGTCGGGTTACT,GGTGGGGTTAGT	150	1,1,1,1,1,1
Lib10^2_#1 100 ng	GGTTGGCTACTA	GGATGGCTACTA,GGGTGGCTACTA,GGTTGACTACTA,GGTTGGCTTCTA,GGTTGGGTACTA	83	1,1,1,1,1
Lib10^2_#1 100 ng	GTACGGCACTGT	GAACGGCACTGT,GGACGGCACTGT,GTACAGCACTGT,GTACGGCACTGG,GTACGGCNCTGT,GTCCGGCACTGT	330	1,2,1,2,1,1
Lib10^2_#1 100 ng	GTACGGTGTTCA	GTACGGTGGTCA,GTACGGTGTACA,GTAGGGTGTTCA,GTGCGGTGTTCA	261	1,1,1,1
Lib10^2_#1 100 ng	GTCTGATACTGG	GTCTGATACTGC,GTCTGATATTGG,GTCTGTTACTGG	69	1,1,1
Lib10^2_#1 100 ng	GTGAGCCGGGCT	GTGAGCAGGGCT,GTGAGCCCGGCT,GTGAGCCGAGCT,GTGAGCCGCGCT,GTGAGCCGGACT,GTGAGCNGGGCT,GTGCGCCGGGCT,GTGGGCCGGGCT,GTGNGCCGGGCT,GTGTGCCGGGCT	358	1,1,1,1,1,1,1,5,1,3
Lib10^2_#1 100 ng	GTGGCAGCTCTA	GTGGCAGCTCAA,GTGGCAGCTTTA,GTGGCAGGTCTA,GTGGGAGCTCTA	228	1,1,12,1
Lib10^2_#1 100 ng	GTGTGGTTGGTT	GTGTGCTTGGTT	52	1
Lib10^2_#1 100 ng	GTGTTCTAGAGG	GTGATCTAGAGG,GTGGTCTAGAGG,GTGTGCTAGAGG,GTGTTCTAGAGA,GTGTTCTAGAGC,GTGTTCTAGGGG,GTGTTCTAGTGG,GTGTTCTTGAGG	354	1,1,2,1,1,5,6,1
Lib10^2_#1 100 ng	GTTAGGCTGCAC	GTCAGGCTGCAC,GTTAGGCTGCAT,GTTAGGNTGCAC,GTTCGGCTGCAC	333	1,1,1,1
Lib10^2_#1 100 ng	GTTGCTAAACAT	GTTGCTAACCAT	15	1
Lib10^2_#1 100 ng	GTTTGTTGGCTC	GGTTGTTGGCTC,GTTTGCTGGCTC,GTTTGGTGGCTC,GTTTGTAGGCTC,GTTTGTTGGATC,GTTTGTTGGCCC	255	1,1,1,1,1,2
Lib10^2_#1 100 ng	GTTTTATTTCGT	GTTATATTTCGT,GTTTTATTTCGG,GTTTTTTTTCGT	238	1,2,2
Lib10^2_#1 100 ng	GTTTTTTACTTG	GATTTTTACTTG,GCTTTTTACTTG,GTGTTTTACTTG,GTTATTTACTTG,GTTNTTTACTTG,GTTTTGTACTTG,GTTTTTTACATG	121	1,1,1,1,1,1,1
Lib10^2_#1 100 ng	TAAGCTCTCAGT		25
Lib10^2_#1 100 ng	TAGTGGATTTAC	TAGAGGATTTAC,TAGGGGATTTAC,TAGTGAATTTAC,TAGTGCATTTAC,TAGTGGATTCAC,TAGTGGATTTTC,TAGTGGTTTTAC,TAGTGTATTTAC	272	1,1,3,2,1,1,1,1
Lib10^2_#1 100 ng	TATAAGATTGGG	AATAAGATTGGG,TATAAGATTGCG,TATAAGATTGGA,TATAAGATTGGC,TATATGATTGGG	292	1,1,1,1,1
Lib10^2_#1 100 ng	TATCGATTATTC	TATCGATTTTTC,TATCGGTTATTC	150	1,1
Lib10^2_#1 100 ng	TATTTATTCTCC	AATTTATTCTCC,TATNTATTCTCC,TATTTACTCTCC,TATTTTTTCTCC	275	1,1,1,1
Lib10^2_#1 100 ng	TATTTTTAAGCG	TATTTTTAAGTG,TATTTTTATGCG,TATTTTTTAGCG,TTTTTTTAAGCG	213	2,1,1,1
Lib10^2_#1 100 ng	TCAATCGGCGTG	TAAATCGGCGTG,TCAATCGGCGAG	211	1,1
Lib10^2_#1 100 ng	TCCGTTTGCTTC	TCCGTCTGCTTC,TCCGTGTGCTTC	84	1,1
Lib10^2_#1 100 ng	TCGAACGTATTG	TCCAACGTATTG,TCGANCGTATTG,TCGGACGTATTG,TCGTACGTATTG	167	1,1,2,1
Lib10^2_#1 100 ng	TCGCCATGTGCT	TCGCCANGTGCT	125	1
Lib10^2_#1 100 ng	TCGCCGTTGATT	TCGCCGTTGGTT	12	1
Lib10^2_#1 100 ng	TCGCTGCTATTT	TAGCTGCTATTT,TCGCTCCTATTT,TCGCTGCNATTT,TCGCTGCTATAT	290	1,1,1,2
Lib10^2_#1 100 ng	TCGTTTGTACTT	TCGATTGTACTT,TCGGTTGTACTT,TGGTTTGTACTT,TTGTTTGTACTT	146	1,1,1,1
Lib10^2_#1 100 ng	TCTATTAAGGCT	TCTAATAAGGCT,TCTATTAAAGCT,TCTATTAAGACT,TCTATTAAGCCT,TCTATTAAGGGT	314	1,1,1,1,1
Lib10^2_#1 100 ng	TCTCGCAAGCAT	TCACGCAAGCAT,TCTCCCAAGCAT,TCTCGCAAGAAT,TCTCGCAGGCAT,TCTCGCTAGCAT,TCTCGNAAGCAT,TCTCGTAAGCAT,TCTCTCAAGCAT	224	1,1,1,1,2,1,1,1
Lib10^2_#1 100 ng	TCTGAACGATGT	TCTGAAAGATGT,TCTGAACGCTGT,TCTGAACGTTGT,TCTGANCGATGT,TCTGCACGATGT,TCTGGACGATGT,TCTGTACGATGT	217	1,1,4,1,1,2,2
Lib10^2_#1 100 ng	TGAGTTTATGTT	TGAGTNTATGTT,TGAGTTTATGTA,TGCGTTTATGTT,TGTGTTTATGTT	94	1,1,1,2
Lib10^2_#1 100 ng	TGATCTGTTGCC	CGATCTGTTGCC,TGATCGGTTGCC,TGATCTGCTGCC,TGATCTGGTGCC,TGCTCTGTTGCC,TGGTCTGTTGCC,TGTTCTGTTGCC	342	1,1,1,3,1,2,2
Lib10^2_#1 100 ng	TGCAGCCCGGGG	TACAGCCCGGGG,TGCAGCCCGAGG,TGCAGCCCGGGC	160	2,1,1
Lib10^2_#1 100 ng	TGCATCCAAGCT	TGCATCCNAGCT,TGCATGCAAGCT,TGCGTCCAAGCT,TGCTTCCAAGCT	141	1,1,1,1
Lib10^2_#1 100 ng	TGCTGTGGCTCA	TGCTGTGGCGCA,TGCTGTTGCTCA	117	1,1
Lib10^2_#1 100 ng	TGGCCAGACTGG	TGACCAGACTGG,TGGCCAGACTGC,TGGCCAGGCTGG,TGGCCAGTCTGG,TGGCCCGACTGG	148	1,1,1,3,1
Lib10^2_#1 100 ng	TGGGGGGTAACG	TGGGGGGTAAGG	44	1
Lib10^2_#1 100 ng	TGGGGTCTAGCG	TGGGGTCTACCG,TGGGGTCTAGAG	69	1,1
Lib10^2_#1 100 ng	TGGTTTCCTTGG	CGGTTTCCTTGG,TCGTTTCCTTGG	180	1,1
Lib10^2_#1 100 ng	TGTAAGGCTGCG	TGTAANGCTGCG,TGTAGGGCTGCG,TGTCAGGCTGCG	185	1,1,1
Lib10^2_#1 100 ng	TGTACTGAGGGA	TGGACTGAGGGA,TGTACCGAGGGA,TGTACGGAGGGA,TGTACTGAGCGA,TGTACTGGGGGA,TGTACTGTGGGA,TGTATTGAGGGA,TGTGCTGAGGGA	238	1,1,1,1,4,3,1,1
Lib10^2_#1 100 ng	TGTAGTGTGACA	TGAAGTGTGACA,TGTAGCGTGACA,TGTAGGGTGACA,TGTAGTGNGACA,TGTAGTGTGATA,TGTAGTGTGGCA,TGTAGTGTGTCA	241	1,1,1,1,1,1,2
Lib10^2_#1 100 ng	TGTCGTCTCTCG	TGACGTCTCTCG,TGGCGTCTCTCG,TGTCGTCTCTCC	290	1,2,1
Lib10^2_#1 100 ng	TGTGTCGCGGCC	TGGGTCGCGGCC,TGTCTCGCGGCC,TGTGACGCGGCC,TGTGGCGCGGCC,TGTGTCGCAGCC,TGTGTCGCGACC,TGTGTGGCGGCC	256	1,1,1,2,1,1,1
Lib10^2_#1 100 ng	TGTTGATCGTGT	TGATGATCGTGT,TGTGGATCGTGT,TGTTAATCGTGT,TGTTGATCGAGT,TGTTGATCGGGT,TGTTGATCGNGT,TGTTGATCGTGA,TGTTGGTCGTGT,TGTTGTTCGTGT,TTTTGATCGTGT	300	1,1,1,1,1,1,1,4,3,1
Lib10^2_#1 100 ng	TTCGATTGACGC	TTCCATTGACGC,TTCGATTGACGT,TTCGATTGCCGC,TTCGATTGGCGC,TTCGATTGTCGC,TTCGGTTGACGC,TTCGTTTGACGC	316	1,1,1,6,3,1,1
Lib10^2_#1 100 ng	TTCTATACATGG	GTCTATACATGG,TTCTAAACATGG,TTCTATACAAGG,TTCTATACATGT,TTGTATACATGG	159	1,1,1,1,1
Lib10^2_#1 100 ng	TTCTATATGTTT	TTATATATGTTT	86	1
Lib10^2_#1 100 ng	TTGACCATAGGT	TTCACCATAGGT,TTGACCATAGGA,TTGACGATAGGT,TTGACNATAGGT,TTGCCCATAGGT,TTGGCCATAGGT,TTGTCCATAGGT	185	1,1,1,1,1,1,2
Lib10^2_#1 100 ng	TTGAGTTATAAT	TTGAGATATAAT,TTGAGGTATAAT,TTGAGTTATTAT,TTGTGTTATAAT	186	1,2,1,1
Lib10^2_#1 100 ng	TTGGATGCCTAG	ATGGATGCCTAG,TTGGATGCCTTG,TTGGATGCGTAG,TTGGATGTCTAG,TTGGGTGCCTAG,TTGGTTGCCTAG	331	1,1,1,2,3,7
Lib10^2_#1 100 ng	TTGTAGTATCGG	TTGGAGTATCGG,TTGTAGCATCGG,TTGTAGGATCGG,TTGTAGTATGGG,TTGTGGTATCGG	178	1,1,1,1,1
Lib10^2_#1 100 ng	TTTCGTTTTTTT	TTTCGTCTTTTT	104	2
Lib10^2_#1 100 ng	TTTCTTTTGTCT	TTTCTCTTGTCT,TTTCTTNTGTCT,TTTCTTTNGTCT,TTTCTTTTGACT	326	1,1,1,1
Lib10^2_#1 100 ng	TTTTCTTCCGCT	ATTTCTTCCGCT,TATTCTTCCGCT,TTTTCTCCCGCT,TTTTGTTCCGCT	75	1,1,1,1

## Sheet: 1B
Sample name	BC	BC(-)	BC#	BC(-)#
Lib10^2_#2 1 ng	AAACGGAGCTCT	AAACGAAGCTCT,AAACGCAGCTCT,AAACGGAACTCT,AAACGGAGCTCA,AAACGGGGCTCT,AAACGGTGCTCT,AAAGGGAGCTCT,AAATGGAGCTCT,AACCGGAGCTCT,ATACGGAGCTCT,TAACGGAGCTCT	388	1,1,1,1,2,4,1,1,1,1,1
Lib10^2_#2 1 ng	AAGGGTCTTCAG	AAGCGTCTTCAG,AAGGGACTTCAG,AAGGGGCTTCAG,AAGGGTCTGCAG,AAGGGTCTTCGG,AAGGGTCTTCTG,AAGGGTCTTTAG,AAGGGTNTTCAG,AGGGGTCTTCAG,TAGGGTCTTCAG	347	1,1,1,1,1,4,1,1,1,1
Lib10^2_#2 1 ng	AATGTCTGGGAG	AATGTCTGGCAG,AATGTCTGGGAA,AATGTCTGGGCG,AATGTCTGGGGG,AATGTCTGGGTG,AGTGTCTGGGAG,GATGTCTGGGAG	420	1,1,2,18,13,2,1
Lib10^2_#2 1 ng	ACCCAGGTTTTT	ACCCAGATTTTT,ACCCAGGATTTT,ACCCAGGCTTTT,ACCCAGGGTTTT,ACCCAGGTTTAT,ACCCAGGTTTCT,ACCCAGGTTTTC,ACCCTGGTTTTT,ACCTAGGTTTTT,ACGCAGGTTTTT,TCCCAGGTTTTT	262	1,1,1,1,1,1,1,1,1,1,1
Lib10^2_#2 1 ng	ACGTGAAGTACG	ACGGGAAGTACG,ACGTGAAGAACG,ACGTGAAGGACG,ACGTGAAGTAGG,ACGTGGAGTACG,ACGTGNAGTACG,TCGTGAAGTACG	440	2,1,2,1,1,1,2
Lib10^2_#2 1 ng	AGACTGAATGTC	AGACTGAATATC,AGACTGAATCTC,AGACTGAATGAC,AGACTGGATGTC,AGACTGTATGTC,AGACTNAATGTC,AGACTTAATGTC,AGCCTGAATGTC,AGGCTGAATGTC,AGTCTGAATGTC	428	1,2,3,2,3,1,1,2,4,3
Lib10^2_#2 1 ng	AGCGTTTTTCAA	AGCCTTTTTCAA,AGCGTATTTCAA,AGCGTGTTTCAA,AGCGTNTTTCAA,AGCGTTTTCCAA,AGCGTTTTTCAT,AGCGTTTTTGAA,AGCTTTTTTCAA,ATCGTTTTTCAA,TGCGTTTTTCAA	282	1,1,2,1,1,1,1,1,1,2
Lib10^2_#2 1 ng	AGCTGGGAGATG	ACCTGGGAGATG,AGCAGGGAGATG,AGCGGGGAGATG,AGCTGGCAGATG,AGCTGGGAGAAG,AGCTGGGAGATT,AGCTGGGAGCTG,AGCTGGGAGGTG,AGCTGGGAGTTG,AGCTGGGCGATG,AGCTGGGGGATG,AGCTGGGTGATG,AGCTGGTAGATG,ATCTGGGAGATG	523	1,1,2,1,1,1,1,9,3,1,5,1,1,1
Lib10^2_#2 1 ng	AGTTCTTGGTCT	ACTTCTTGGTCT,AGTACTTGGTCT,AGTGCTTGGTCT,AGTTCTTCGTCT,AGTTCTTGGGCT,AGTTGTTGGTCT	330	1,1,1,1,1,1
Lib10^2_#2 1 ng	ATAAGGCATAAG	ATAAGGCATAGG,ATAAGGCTTAAG	202	1,1
Lib10^2_#2 1 ng	ATATTGGGATTC	ATATTGGGAGTC	281	1
Lib10^2_#2 1 ng	ATGTGTCGTTCC	ATGTGGCGTTCC,ATGTGNCGTTCC,ATGTGTAGTTCC,ATGTGTCGATCC,ATGTGTCGGTCC,ATGTGTCGTACC,ATGTGTCGTCCC	273	2,1,1,1,1,4,3
Lib10^2_#2 1 ng	ATGTTAGTGACG	ATGGTAGTGACG,ATGTTACTGACG,ATGTTAGNGACG,ATGTTAGTCACG,ATGTTAGTGAAG,ATGTTAGTGACC,ATGTTAGTGAGG,ATGTTAGTGCCG,ATGTTAGTGGCG,ATGTTAGTGTCG,GTGTTAGTGACG	491	1,1,1,1,1,2,1,6,4,14,1
Lib10^2_#2 1 ng	ATTCGCTCTTCA	ATTCGCTCTTCG	62	1
Lib10^2_#2 1 ng	ATTGGAATGGGG	ATTGGAAAGGGG,ATTGGAATGCGG,ATTGGAGTGGGG,ATTGGGATGGGG,ATTGTAATGGGG	327	1,1,1,2,2
Lib10^2_#2 1 ng	ATTTGTAACTAT	AGTTGTAACTAT,ATTTGAAACTAT,ATTTGGAACTAT,ATTTGTAACTGT,ATTTGTTACTAT	231	1,1,1,1,1
Lib10^2_#2 1 ng	ATTTTGCCGAAT	ATATTGCCGAAT,ATGTTGCCGAAT,ATTTTGCCGACT,ATTTTGCCGCAT,ATTTTGCCGGAT,ATTTTGCGGAAT,ATTTTGCTGAAT	424	1,1,1,1,1,1,1
Lib10^2_#2 1 ng	CAACGGCTAGCG	CAACGACTAGCG,CAACGGCAAGCG,CAACGGCTACCG,CAACGGCTTGCG,CAACGTCTAGCG,CACCGGCTAGCG,CATCGGCTAGCG,CTACGGCTAGCG	468	1,1,1,1,1,1,1,1
Lib10^2_#2 1 ng	CACGCTACGTCT	CACGCTACGTCA,CACGCTGCGTCT	184	1,1
Lib10^2_#2 1 ng	CACTCTTGTCTT	CACTCTTGGCTT	45	1
Lib10^2_#2 1 ng	CAGTCGCTTTTG	CAGACGCTTTTG,CAGGCGCTTTTG,CAGTCGCATTTG,CAGTCGCCTTTG,CAGTCGCGTTTG,CAGTCGCTGTTG,CAGTCGCTTTAG,CAGTCGCTTTCG,CAGTCGCTTTTC,CTGTCGCTTTTG	258	1,1,10,9,3,1,1,1,2,1
Lib10^2_#2 1 ng	CATATTTGATCT	CATACTTGATCT,CATATATGATCT,CATATTTGTTCT	245	1,1,1
Lib10^2_#2 1 ng	CCAGTTATTTTT	CCAGCTATTTTT,CCAGGTATTTTT,CCAGTAATTTTT,CCAGTCATTTTT,CCAGTTACTTTT,CCAGTTATATTT,CCAGTTATGTTT,TCAGTTATTTTT	309	1,1,1,1,1,1,1,1
Lib10^2_#2 1 ng	CCATTGGCGTAT	CCATTAGCGTAT,CCATTCGCGTAT,CCATTGGCATAT,CCATTGGCGTAG,CCGTTGGCGTAT	128	1,1,1,1,1
Lib10^2_#2 1 ng	CCCGTGTGACTT	CCCCTGTGACTT,CCCGGGTGACTT,CCCGTCTGACTT,CCCGTGGGACTT,CCCGTGTCACTT,CCCGTGTGTCTT,CCCGTNTGACTT	202	1,1,2,1,1,3,1
Lib10^2_#2 1 ng	CCCGTTAACAGA	CCCGCTAACAGA,CCCGTNAACAGA,CCCGTTAACAGG,CCCGTTAACAGT,CCCGTTAATAGA,CCCGTTAGCAGA,CCCGTTANCAGA	368	1,1,6,4,1,1,1
Lib10^2_#2 1 ng	CCTGCTTAGTTG	CCTGCNTAGTTG,CCTGCTTAGATG,CCTGCTTNGTTG	347	1,2,1
Lib10^2_#2 1 ng	CGCCGGGCTTGA	CGCCGGCCTTGA,CGCCGGGCTTGC,CGCCGGGCTTGG,CGCCGGGCTTGT	333	1,3,3,2
Lib10^2_#2 1 ng	CGGTCATAGTCA	AGGTCATAGTCA,CCGTCATAGTCA,CGCTCATAGTCA,CGGCCATAGTCA,CGGGCATAGTCA,CGGTCAAAGTCA,CGGTCACAGTCA,CGGTCATAGCCA	342	1,2,1,1,3,1,1,1
Lib10^2_#2 1 ng	CGTGCCCTCGGC	CGTGCCCACGGC,CGTGCCCCCGGC,CGTGCCCTCCGC,CGTGCCCTCGAC,CGTGCCCTCGGT,CGTGCCCTCGTC,CGTGCCNTCGGC,CGTGCNCTCGGC,CGTGCTCTCGGC,TGTGCCCTCGGC	368	1,1,1,1,1,1,1,1,1,1
Lib10^2_#2 1 ng	CTATCGGGGCGC	CTATCGCGGCGC,CTATCGGGACGC,CTATCGGGGCCC,CTATCGGGGGGC,CTATCGGGTCGC,CTATCGTGGCGC,CTATTGGGGCGC,CTCTCGGGGCGC,CTNTCGGGGCGC,CTTTCGGGGCGC	396	1,1,1,1,1,1,1,1,1,2
Lib10^2_#2 1 ng	CTCATCCACATT	CTCATCCCCATT,CTCATCCGCATT,CTCATCTACATT,GTCATCCACATT	281	1,1,1,1
Lib10^2_#2 1 ng	CTCTGCTTTTCT	CACTGCTTTTCT,CTCTGATTTTCT,CTCTGCTCTTCT,CTCTGTTTTTCT,CTTTGCTTTTCT	185	1,1,1,1,1
Lib10^2_#2 1 ng	CTCTTCACTCAT	CTCTTCANTCAT,TTCTTCACTCAT	119	1,1
Lib10^2_#2 1 ng	CTGGGCACTAGG	CTGGGCACTAAG,CTGGGCACTTGG,CTGGGCNCTAGG,CTGGGGACTAGG,GTGGGCACTAGG	274	1,2,1,1,1
Lib10^2_#2 1 ng	CTGGGGATAGCC	CTGAGGATAGCC,CTGGGAATAGCC,CTGGGGAAAGCC,CTGGGGATANCC,CTGGGGATTGCC,CTGGGGGTAGCC,CTGGGGNTAGCC,TTGGGGATAGCC	338	1,1,1,1,3,5,1,2
Lib10^2_#2 1 ng	CTTGTGTTATGT	CATGTGTTATGT,CTTGTGATATGT,CTTGTGCTATGT,CTTGTGTTAAGT	218	1,1,1,1
Lib10^2_#2 1 ng	CTTTCTCGTCGA	ATTTCTCGTCGA,CATTCTCGTCGA,CTTGCTCGTCGA,CTTTCTCGGCGA,CTTTCTCGTAGA,CTTTCTCGTCGG,CTTTCTCGTCGT,CTTTCTCNTCGA	496	1,2,1,1,1,2,4,1
Lib10^2_#2 1 ng	CTTTGCTATCCG	CATTGCTATCCG,CTCTGCTATCCG,CTTAGCTATCCG,CTTCGCTATCCG,CTTNGCTATCCG,CTTTGCTATCCT,CTTTGCTATGCG,CTTTGGTATCCG,GTTTGCTATCCG	371	1,1,1,1,1,1,1,1,1
Lib10^2_#2 1 ng	GAATTCCTTCCT	CAATTCCTTCCT,GAATACCTTCCT,GAATGCCTTCCT,GAATNCCTTCCT,GAATTCCNTCCT,GAATTCCTTCCC,GAATTCCTTCTT,GAATTCGTTCCT,GAATTCNTTCCT,GGATTCCTTCCT,GTATTCCTTCCT	389	1,3,1,1,2,1,1,1,2,1,4
Lib10^2_#2 1 ng	GAGACACGTGGG	GAGACACGGGGG,GAGACACGTGGC,GAGACACGTGGT,GAGTCACGTGGG,GGGACACGTGGG,GTGACACGTGGG	212	2,1,1,2,2,5
Lib10^2_#2 1 ng	GAGACTGAGAAT	GAGACCGAGAAT,GAGACTGAGGAT,GAGACTGGGAAT,GAGACTGTGAAT,GAGGCTGAGAAT,GAGTCTGAGAAT,GGGACTGAGAAT,GTGACTGAGAAT	309	1,1,2,1,2,1,5,3
Lib10^2_#2 1 ng	GAGTCAGGTACT	GAGTCAGGTCCT	94	1
Lib10^2_#2 1 ng	GATCTTTTAGTC	GACCTTTTAGTC,GATCTTTTAGAC,GATCTTTTTGTC,GATGTTTTAGTC,GGTCTTTTAGTC	237	1,1,1,1,1
Lib10^2_#2 1 ng	GATTGTATTTGT	GATGGTATTTGT,GATTGAATTTGT,GATTGGATTTGT,GATTGTATTTAT,GATTGTATTTGA,GATTGTATTTGG,GGTTGTATTTGT,GTTTGTATTTGT	353	1,1,1,1,1,1,1,2
Lib10^2_#2 1 ng	GCATGACGCGGC	ACATGACGCGGC,GCATGGCGCGGC,GCATGTCGCGGC,GNATGACGCGGC	375	1,2,1,1
Lib10^2_#2 1 ng	GCGCACCTCAAA	GCGCACCTCAAC,GCGGACCTCAAA	131	1,1
Lib10^2_#2 1 ng	GCGGTCAGCGTT	GCGGTCAGCGAT,GCGGTCAGCGTG,GCGGTCTGCGTT	267	2,1,1
Lib10^2_#2 1 ng	GCGTGTTTGTCT	GAGTGTTTGTCT,GCGAGTTTGTCT,GCGTGTTGGTCT,GCGTGTTTGACT,GCGTGTTTGCCT,GCGTGTTTGGCT,GCGTGTTTGTCC,GTGTGTTTGTCT	332	1,1,1,1,1,2,1,1
Lib10^2_#2 1 ng	GCGTTTTTGGAG	GAGTTTTTGGAG,GCGATTTTGGAG,GCGCTTTTGGAG,GCGTCTTTGGAG,GCGTGTTTGGAG,GCGTTTTTGGCG,GCGTTTTTGGGG,GCGTTTTTGGTG	386	1,2,1,1,1,5,13,17
Lib10^2_#2 1 ng	GCTACATGTTTG	ACTACATGTTTG,GCCACATGTTTG,GCTACATGCTTG,GCTACATNTTTG,GGTACATGTTTG	266	1,1,1,1,1
Lib10^2_#2 1 ng	GCTACCGTTTTT	GCTACCCTTTTT,GCTACCGTATTT,GCTACCGTCTTT,GCTACCGTGTTT,GCTACCGTTTCT,GCTNCCGTTTTT,GTTACCGTTTTT,TCTACCGTTTTT	315	2,2,2,3,1,1,1,1
Lib10^2_#2 1 ng	GCTGTAAAGTTT	GCTGGAAAGTTT,GCTGTAAAGCTT,GCTGTAAAGTAT	375	1,1,1
Lib10^2_#2 1 ng	GGCCTGACGAGT	GGCCTGACGAGA,GGCCTGACGAGG,GGCCTGACGGGT,GGCCTGACGTGT,GGCCTGCCGAGT,GGCCTGGCGAGT,GGCCTGTCGAGT,GGTCTGACGAGT	291	2,1,1,6,1,2,1,1
Lib10^2_#2 1 ng	GGCGACGCGCAT	GCCGACGCGCAT	44	1
Lib10^2_#2 1 ng	GGGAGAGTAATC	GAGAGAGTAATC,GGGAGAGGAATC,GGGAGAGTATTC,GGGAGCGTAATC,GGGAGTGTAATC,GGGTGAGTAATC,GTGAGAGTAATC	181	1,2,1,1,1,1,1
Lib10^2_#2 1 ng	GGGATGTGATGG	GGCATGTGATGG,GGGATGTGAGGG,GGGATGTGATGC,GGGATGTGGTGG,GGGATGTGTTGG,GGGGTGTGATGG,GGGTTGTGATGG,GGTATGTGATGG	248	1,1,1,1,1,1,1,1
Lib10^2_#2 1 ng	GGGGGTGTGAAG	GGGGGTGTGATG,GGGGGTGTGTAG	82	2,1
Lib10^2_#2 1 ng	GGTACCATGTAG	GGTACCATGTGG,GGTACCATGTTG,GGTACCTTGTAG,GGTTCCATGTAG	217	1,1,1,1
Lib10^2_#2 1 ng	GTATAGTCTATT	GTATAGTCCATT,GTATAGTCTAAT,GTATAGTCTATG,GTATAGTCTCTT	296	1,1,1,1
Lib10^2_#2 1 ng	GTCACCGGGTTC	GTCACCGGGATC,GTCACCGNGTTC,GTCGCCGGGTTC,GTTACCGGGTTC	116	2,1,1,1
Lib10^2_#2 1 ng	GTCGGTGGCACT	CTCGGTGGCACT,GTCAGTGGCACT,GTCGGAGGCACT,GTCGGCGGCACT,GTCGGGGGCACT,GTCGGTGCCACT,GTCGGTGGCACC,GTCGGTGGCTCT,GTCGGTGGGACT,GTTGGTGGCACT	316	1,1,3,1,5,2,2,1,1,1
Lib10^2_#2 1 ng	GTCTCTTTGGCT	GACTCTTTGGCT,GGCTCTTTGGCT,GTCTCNTTGGCT,GTCTCTTTGCCT,GTCTCTTTGGAT,GTCTCTTTGGCC,GTCTCTTTGGGT,GTCTCTTTGTCT,GTCTNTTTGGCT	296	1,1,2,2,1,1,1,1,1
Lib10^2_#2 1 ng	GTGATATGAGGT	GCGATATGAGGT,GTGATATGAGGA,GTGATATGATGT,GTGATATGGGGT,GTGATATGTGGT,GTGGTATGAGGT	329	1,1,1,1,5,1
Lib10^2_#2 1 ng	GTGCTTTAACTG		105
Lib10^2_#2 1 ng	TAAATATGCGCT	TAAATATGCGGT,TAAATATGCTCT,TAAATATNCGCT,TATATATGCGCT	284	1,1,1,1
Lib10^2_#2 1 ng	TACAGGGGGTCG	TACAGGTGGTCG,TACTGGGGGTCG	117	1,1
Lib10^2_#2 1 ng	TACGAGATTTAT	TACGAGANTTAT,TACGAGATATAT,TACGAGATTGAT,TACGAGCTTTAT,TACGCGATTTAT,TACGGGATTTAT,TACGTGATTTAT,TTCGAGATTTAT	296	1,1,1,1,1,1,5,1
Lib10^2_#2 1 ng	TACTTTTCTTAT	TACNTTTCTTAT,TACTTTCCTTAT,TACTTTNCTTAT,TACTTTTGTTAT,TTCTTTTCTTAT	456	1,1,1,1,1
Lib10^2_#2 1 ng	TAGTCACTGCTT	TAGCCACTGCTT,TAGGCACTGCTT,TAGTCATTGCTT,TAGTCCCTGCTT	379	1,1,1,1
Lib10^2_#2 1 ng	TAGTCTTAGGTC	CAGTCTTAGGTC,TACTCTTAGGTC,TAGTCTGAGGTC,TAGTCTTAGATC,TAGTCTTAGGAC,TAGTCTTAGGCC,TAGTCTTNGGTC	422	1,1,1,1,3,1,1
Lib10^2_#2 1 ng	TATATGGACTTG	TATACGGACTTG,TATAGGGACTTG,TATATGGGCTTG,TATATGGTCTTG	252	1,1,1,2
Lib10^2_#2 1 ng	TCATCGTTTGGC	TCATCCTTTGGC,TCATCGATTGGC,TCATCGNTTGGC,TCATCGTGTGGC,TCATCGTTGGGC,TCATGGTTTGGC,TCGTCGTTTGGC,TTATCGTTTGGC	374	2,2,1,2,1,1,1,2
Lib10^2_#2 1 ng	TCCGCTTTCGTT	TACGCTTTCGTT,TCCGCTTCCGTT,TCCGCTTTCATT,TCCGCTTTCGGT	90	1,1,1,1
Lib10^2_#2 1 ng	TCCTGGCTTACT	TCCTGGCATACT,TCCTGGCTGACT,TCCTGGCTTACG	406	1,1,1
Lib10^2_#2 1 ng	TCGGAAGGACTA	TCGGAAGGTCTA,TCGGAAGNACTA,TTGGAAGGACTA	125	1,1,1
Lib10^2_#2 1 ng	TGACCGTCCAGT	TGACCCTCCAGT,TGACCGTCCCGT,TGCCCGTCCAGT,TGGCCGTCCAGT,TGTCCGTCCAGT	167	1,1,1,6,4
Lib10^2_#2 1 ng	TGACCTCGTGAT	AGACCTCGTGAT,TCACCTCGTGAT,TGACCCCGTGAT,TGACCGCGTGAT,TGACCTCATGAT,TGACCTCCTGAT,TGACCTCGAGAT,TGACCTCGTAAT,TGACCTCGTGAA,TGACCTCGTGGT,TGACCTCGTGTT,TGACCTCNTGAT,TGACCTNGTGAT,TGCCCTCGTGAT,TGGCCTCGTGAT,TGTCCTCGTGAT	898	1,1,1,1,1,1,1,1,1,2,4,2,1,2,6,13
Lib10^2_#2 1 ng	TGAGTGTAGTTG	TCAGTGTAGTTG,TGAGTGGAGTTG,TGAGTGTAGGTG,TGTGTGTAGTTG	173	1,1,1,1
Lib10^2_#2 1 ng	TGATGGCGACAC	TGACGGCGACAC,TGAGGGCGACAC,TGATGACGACAC,TGATGGCCACAC,TGATGGCGACAT,TGATGGCGAGAC,TGATGGCGTCAC,TGATGNCGACAC,TGATGTCGACAC,TGGTGGCGACAC	345	1,1,1,1,1,2,4,1,1,2
Lib10^2_#2 1 ng	TGCGAGGGTATC	TGCCAGGGTATC,TGCGAGGGTAAC,TGCGGGGGTATC	137	1,1,1
Lib10^2_#2 1 ng	TGTCGTATGGGC		73
Lib10^2_#2 1 ng	TGTGTTGATGGT	TATGTTGATGGT,TGAGTTGATGGT,TGTGTTGATGCT,TGTGTTGATGGA,TGTGTTGATGGC,TGTGTTGGTGGT,TGTGTTGTTGGT	214	1,1,2,1,1,2,3
Lib10^2_#2 1 ng	TTAGTATTTGAG	TTAGAATTTGAG,TTAGTACTTGAG,TTAGTATTTAAG,TTAGTATTTGGG,TTAGTGTTTGAG	292	1,1,1,25,1
Lib10^2_#2 1 ng	TTAGTTGTCGCC	TTAGTTGGCGCC,TTAGTTGTCCCC	199	1,1
Lib10^2_#2 1 ng	TTCACTGATTAT	TCCACTGATTAT,TTCACNGATTAT,TTCACTAATTAT,TTCACTGAATAT,TTCACTGATAAT,TTCACTGGTTAT,TTCACTNATTAT,TTTACTGATTAT	441	1,1,1,1,1,3,1,1
Lib10^2_#2 1 ng	TTCCATGCCTGC	ATCCATGCCTGC,TTCCANGCCTGC,TTCCATGCCTCC,TTCCATGCCTGA,TTCCATGCCTGG	222	1,1,1,1,1
Lib10^2_#2 1 ng	TTCGTAGGGGTT	TTCGTAGGGGAT,TTCGTAGGTGTT,TTCTTAGGGGTT	77	1,1,1
Lib10^2_#2 1 ng	TTCGTATATCTT	TTCGGATATCTT,TTCNTATATCTT	122	1,1
Lib10^2_#2 1 ng	TTGCGAATTGTT	CTGCGAATTGTT,TTGCGAATTGGT,TTGCGAATTGTC,TTGCGGATTGTT	344	3,1,1,1
Lib10^2_#2 1 ng	TTGGGCAGCCTT	TTGGCCAGCCTT,TTGGGCAGCCTC,TTGGGCAGGCTT,TTGGGCAGTCTT,TTGGGCANCCTT,TTGGGCTGCCTT,TTGGGGAGCCTT	352	1,1,1,1,1,1,1
Lib10^2_#2 1 ng	TTGTTGGCTCGG	GTGTTGGCTCGG,TAGTTGGCTCGG,TTATTGGCTCGG,TTGATGGCTCGG,TTGCTGGCTCGG,TTGGTGGCTCGG,TTGTTGGCACGG,TTGTTGGCTCCG,TTGTTGGCTCGC,TTGTTGTCTCGG	516	1,1,1,2,1,1,1,1,2,1
Lib10^2_#2 1 ng	TTTATGTCCCGC	TTTACGTCCCGC,TTTATGTCCCCC,TTTATGTCCCGG,TTTATGTCCCGT	116	1,1,1,1
Lib10^2_#2 1 ng	TTTGGCGTATCG	TTTGGCGGATCG,TTTGGCGTTTCG,TTTGGTGTATCG	307	1,1,1
Lib10^2_#2 1 ng	TTTTATCATCGG	ATTTATCATCGG,TTTTACCATCGG,TTTTATCATAGG,TTTTATCATCGA,TTTTATCNTCGG,TTTTATTATCGG,TTTTTTCATCGG	402	1,1,1,1,1,1,1
Lib10^2_#2 1 ng	TTTTGTCGCTTA	TTATGTCGCTTA,TTCTGTCGCTTA,TTGTGTCGCTTA,TTTTGACGCTTA,TTTTGGCGCTTA,TTTTGTCGCTTT	255	1,1,1,1,1,1
Lib10^2_#2 1 ng	TTTTTGATTCTT	TCTTTGATTCTT,TTGTTGATTCTT,TTTCTGATTCTT,TTTGTGATTCTT,TTTTTGGTTCTT,TTTTTGTTTCTT	334	1,1,1,1,2,2
Lib10^2_#2 3.3 ng	AAACGGAGCTCT	AAACCGAGCTCT,AAACGCAGCTCT,AAACGGANCTCT,AAACGGGGCTCT	353	1,1,1,2
Lib10^2_#2 3.3 ng	AAGGGTCTTCAG	AACGGTCTTCAG,AAGCGTCTTCAG,AAGGATCTTCAG,AAGGGTCTTCAA,AAGGGTCTTCCG,AAGGGTCTTCGG,AAGGGTCTTCTG,CAGGGTCTTCAG	293	1,1,1,1,1,2,1,1
Lib10^2_#2 3.3 ng	AATGTCTGGGAG	AAAGTCTGGGAG,AATGACTGGGAG,AATGTCTGGCAG,AATGTCTGGGCG,AATGTCTGGGGG,AATGTCTGGGTG,AATGTNTGGGAG,ATTGTCTGGGAG	393	1,1,1,1,16,8,1,1
Lib10^2_#2 3.3 ng	ACCCAGGTTTTT	ACCCAGGTGTTT,ACCCAGGTTTAT,ACCCAGGTTTGT,ACCTAGGTTTTT	211	1,2,1,1
Lib10^2_#2 3.3 ng	ACGTGAAGTACG	ACGTGAAGAACG,ACGTGAAGTATG,ACGTGGAGTACG,ACGTGTAGTACG,ATGTGAAGTACG,CCGTGAAGTACG	375	1,1,3,2,1,1
Lib10^2_#2 3.3 ng	AGACTGAATGTC	AGACTGAAGGTC,AGACTGAATGAC,AGACTGTATGTC,AGACTNAATGTC,AGAGTGAATGTC,AGTCTGAATGTC	389	1,1,2,1,1,2
Lib10^2_#2 3.3 ng	AGCGTTTTTCAA	AGCGATTTTCAA,AGCGTATTTCAA,AGCGTTATTCAA,AGCGTTNTTCAA,AGCGTTTNTCAA,AGCGTTTTCCAA,AGCGTTTTTCTA	279	1,1,1,1,1,2,1
Lib10^2_#2 3.3 ng	AGCTGGGAGATG	AGCCGGGAGATG,AGCTGGGAGACG,AGCTGGGAGATT,AGCTGGGAGCTG,AGCTGGGAGGTG,AGCTGGGAGTTG,AGCTGGGCGATG,AGCTGGGGGATG,AGCTGGGTGATG,AGTTGGGAGATG,ATCTGGGAGATG	446	1,1,1,1,11,4,1,2,1,1,1
Lib10^2_#2 3.3 ng	AGTTCTTGGTCT	AGATCTTGGTCT,AGTACTTGGTCT,AGTGCTTGGTCT,AGTTCTGGGTCT,AGTTCTTGCTCT,AGTTCTTGGACT,AGTTCTTGGGCT	316	2,1,1,1,1,1,2
Lib10^2_#2 3.3 ng	ATAAGGCATAAG	ATAAGACATAAG,ATAAGGCATAGG,ATAAGGCATATG,ATAAGGCGTAAG,ATAAGGCTTAAG	216	1,1,1,1,1
Lib10^2_#2 3.3 ng	ATATTGGGATTC	ATATTGAGATTC,ATATTGGGACTC	248	2,1
Lib10^2_#2 3.3 ng	ATGTGTCGTTCC	ATGTGACGTTCC,ATGTGCCGTTCC,ATGTGTCNTTCC	245	2,1,1
Lib10^2_#2 3.3 ng	ATGTTAGTGACG	ATGCTAGTGACG,ATGGTAGTGACG,ATGTTAGTGACC,ATGTTAGTGCCG,ATGTTAGTGGCG,ATGTTAGTGTCG,TTGTTAGTGACG	426	2,2,1,2,5,8,1
Lib10^2_#2 3.3 ng	ATTCGCTCTTCA		67
Lib10^2_#2 3.3 ng	ATTGGAATGGGG	ACTGGAATGGGG,ATTGCAATGGGG,ATTGGAATGCGG,ATTGGAATGTGG,ATTGGGATGGGG,ATTGGNATGGGG,ATTGGTATGGGG	284	1,2,1,1,1,1,2
Lib10^2_#2 3.3 ng	ATTTGTAACTAT	ATTTGGAACTAT,ATTTGNAACTAT,ATTTGTAGCTAT,ATTTGTNACTAT	174	2,2,1,1
Lib10^2_#2 3.3 ng	ATTTTGCCGAAT	ACTTTGCCGAAT,ATATTGCCGAAT,ATTCTGCCGAAT,ATTGTGCCGAAT,ATTTTGCCCAAT,ATTTTGCCGATT,ATTTTGCCGGAT,ATTTTGGCGAAT,GTTTTGCCGAAT	379	1,2,1,1,1,1,2,1,1
Lib10^2_#2 3.3 ng	CAACGGCTAGCG	CAACGCCTAGCG,CAACGGCTACCG,CAACGGCTAGCA,CAACGGCTTGCG,CAACGNCTAGCG,CATCGGCTAGCG	407	2,1,1,1,1,1
Lib10^2_#2 3.3 ng	CACGCTACGTCT	CACCCTACGTCT,CACGCAACGTCT,CACGCTACGCCT	169	1,1,1
Lib10^2_#2 3.3 ng	CACTCTTGTCTT	CACTCTTGGCTT,CACTCTTGTCAT	45	1,1
Lib10^2_#2 3.3 ng	CAGTCGCTTTTG	CAGTCGCATTTG,CAGTCGCCTTTG,CAGTCGCGTTTG,CAGTCGCTTCTG,CAGTCGCTTTAG,CAGTCGTTTTTG,TAGTCGCTTTTG	221	8,8,2,1,1,1,1
Lib10^2_#2 3.3 ng	CATATTTGATCT	CATATGTGATCT,GATATTTGATCT	215	1,1
Lib10^2_#2 3.3 ng	CCAGTTATTTTT	CCACTTATTTTT,CCAGCTATTTTT,CCAGGTATTTTT,CCAGTCATTTTT,CCAGTTATTTAT,CCAGTTATTTTC	271	1,1,2,1,1,1
Lib10^2_#2 3.3 ng	CCATTGGCGTAT	CCGTTGGCGTAT,CTATTGGCGTAT	130	1,1
Lib10^2_#2 3.3 ng	CCCGTGTGACTT	CCCGTGTGCCTT,CCCGTGTGTCTT,CCCGTGTTACTT,CCCTTGTGACTT	167	1,2,1,1
Lib10^2_#2 3.3 ng	CCCGTTAACAGA	CCCGGTAACAGA,CCCGTTAACAGG,CCCGTTAACAGT,CCCGTTAACTGA,CCCGTTACCAGA,CCCGTTNACAGA,CCCGTTTACAGA,GCCGTTAACAGA	287	1,2,2,1,1,1,1,1
Lib10^2_#2 3.3 ng	CCTGCTTAGTTG	CCTCCTTAGTTG,CCTNCTTAGTTG	298	2,1
Lib10^2_#2 3.3 ng	CGCCGGGCTTGA	CACCGGGCTTGA,CGCAGGGCTTGA,CGCCAGGCTTGA,CGCCGGGCTAGA,CGCCGGGCTTGG,CGCCGGGCTTGT,CTCCGGGCTTGA	289	1,1,1,1,3,2,1
Lib10^2_#2 3.3 ng	CGGTCATAGTCA	CCGTCATAGTCA,CGGACATAGTCA,CGGGCATAGTCA,CGGTCANAGTCA,CGGTCATAGGCA,CGGTCATAGTCT	309	1,1,1,1,1,1
Lib10^2_#2 3.3 ng	CGTGCCCTCGGC	CCTGCCCTCGGC,CGAGCCCTCGGC,CGCGCCCTCGGC,CGGGCCCTCGGC,CGTCCCCTCGGC,CGTGCCCTAGGC,CGTGCCCTCGAC,CGTGCCCTCGGG,CGTGTCCTCGGC	334	1,2,1,1,1,1,1,3,1
Lib10^2_#2 3.3 ng	CTATCGGGGCGC	CTAACGGGGCGC,CTATCGGCGCGC,CTATCGGGACGC,CTATCGGGCCGC,CTATCGGGGCCC,CTATCGGGGCGG	380	1,2,1,1,1,1
Lib10^2_#2 3.3 ng	CTCATCCACATT	CACATCCACATT,CCCATCCACATT,CTCAGCCACATT,CTCATCAACATT,CTCATCCACAAT,CTCATCCACTTT,CTCGTCCACATT	265	4,1,1,1,1,1,2
Lib10^2_#2 3.3 ng	CTCTGCTTTTCT	CACTGCTTTTCT,CTCAGCTTTTCT,CTCTCCTTTTCT,CTCTGCNTTTCT,CTCTGCTTCTCT,CTCTGCTTTTTT	187	1,1,1,1,1,1
Lib10^2_#2 3.3 ng	CTCTTCACTCAT	CTCTTCTCTCAT	109	1
Lib10^2_#2 3.3 ng	CTGGGCACTAGG	CAGGGCACTAGG,CTGGGCACCAGG,CTGGGCACTACG,CTGGGCACTAGA,CTGGGCACTAGT	251	1,1,1,1,1
Lib10^2_#2 3.3 ng	CTGGGGATAGCC	CTGCGGATAGCC,CTGGGGATACCC,CTGGGGATAGGC,CTGGGGATCGCC,CTGGGGATGGCC,CTGGGGGTAGCC,CTGGGGTTAGCC,TTGGGGATAGCC	300	1,1,1,1,1,1,1,1
Lib10^2_#2 3.3 ng	CTTGTGTTATGT	CTTGAGTTATGT,CTTGGGTTATGT,CTTGTGCTATGT,CTTGTGGTATGT,CTTGTGTTATGG	192	1,1,1,1,1
Lib10^2_#2 3.3 ng	CTTTCTCGTCGA	CTTTCGCGTCGA,CTTTCTCCTCGA,CTTTCTCGACGA,CTTTCTCGGCGA,CTTTCTCGTCCA,CTTTCTCGTCGG,CTTTCTCGTCGT,CTTTCTCGTGGA	415	1,1,1,1,1,3,2,1
Lib10^2_#2 3.3 ng	CTTTGCTATCCG	CTTAGCTATCCG,CTTTGCTATCCC	306	1,1
Lib10^2_#2 3.3 ng	GAATTCCTTCCT	AAATTCCTTCCT,GAATTCCTGCCT,GAATTCCTTCTT,GAATTNCTTCCT,GACTTCCTTCCT,GAGTTCCTTCCT,GGATTCCTTCCT,GTATTCCTTCCT	328	1,1,1,1,1,1,2,1
Lib10^2_#2 3.3 ng	GAGACACGTGGG	GAGACACGAGGG,GAGACACGGGGG,GAGACACGTGGT,GAGACGCGTGGG,GGGACACGTGGG,GTGACACGTGGG	164	1,1,1,1,1,1
Lib10^2_#2 3.3 ng	GAGACTGAGAAT	GAGAATGAGAAT,GAGACTGAGATT,GAGACTGAGTAT,GAGACTGGGAAT,GAGACTGTGAAT,GAGGCTGAGAAT,GGGACTGAGAAT,GTGACTGAGAAT	305	1,2,1,2,4,2,2,4
Lib10^2_#2 3.3 ng	GAGTCAGGTACT	GAGCCAGGTACT,GAGTCAGGGACT,GAGTCAGGTACG,GTGTCAGGTACT	79	1,1,1,1
Lib10^2_#2 3.3 ng	GATCTTTTAGTC	GATCTNTTAGTC,GATCTTATAGTC,GATCTTCTAGTC,GATCTTTTAGCC,GGTCTTTTAGTC,GTTCTTTTAGTC	193	1,1,1,1,1,1
Lib10^2_#2 3.3 ng	GATTGTATTTGT	GATTGAATTTGT,GATTGGATTTGT,GATTGNATTTGT,GATTGTACTTGT,GATTGTATTAGT,GATTGTATTTGC,GATTGTATTTGG,GGTTGTATTTGT,GTTTGTATTTGT	289	1,2,1,2,1,1,1,2,1
Lib10^2_#2 3.3 ng	GCATGACGCGGC	GCANGACGCGGC,GCATGACGCCGC,GCATGACGCGGG,GCATGACGTGGC,GCATGACNCGGC,GCATGATGCGGC,GCATGGCGCGGC,GCATGTCGCGGC	325	1,2,2,1,1,1,5,1
Lib10^2_#2 3.3 ng	GCGCACCTCAAA	GCGCACCTGAAA,GCTCACCTCAAA	120	1,1
Lib10^2_#2 3.3 ng	GCGGTCAGCGTT	GCGGTCAGCCTT,GCGGTCAGCGTA,GCGGTCTGCGTT	220	2,1,1
Lib10^2_#2 3.3 ng	GCGTGTTTGTCT	GCGAGTTTGTCT,GCGGGTTTGTCT,GCGTGATTGTCT,GCGTGGTTGTCT,GCGTGTATGTCT,GCGTGTTTGCCT,GCGTGTTTGGCT,GTGTGTTTGTCT	322	3,1,1,2,1,1,2,1
Lib10^2_#2 3.3 ng	GCGTTTTTGGAG	GCATTTTTGGAG,GCGATTTTGGAG,GCGGTTTTGGAG,GCGTTTTTAGAG,GCGTTTTTGCAG,GCGTTTTTGGCG,GCGTTTTTGGGG,GCGTTTTTGGTG,GGGTTTTTGGAG	279	1,2,2,1,2,1,14,6,1
Lib10^2_#2 3.3 ng	GCTACATGTTTG	GCTACATGGTTG,GCTACATGTATG,GGTACATGTTTG	224	1,1,1
Lib10^2_#2 3.3 ng	GCTACCGTTTTT	GCTACCCTTTTT,GCTACCGCTTTT,GCTACCGTATTT,GCTACCGTCTTT,GCTACCGTGTTT,GCTACCGTTTTC,GCTACTGTTTTT,GCTGCCGTTTTT	278	1,1,2,5,2,1,1,1
Lib10^2_#2 3.3 ng	GCTGTAAAGTTT	GCTGAAAAGTTT,GCTGTAAAGATT,GCTGTAAAGTGT,GCTGTNAAGTTT	341	2,1,1,1
Lib10^2_#2 3.3 ng	GGCCTGACGAGT	GACCTGACGAGT,GGCCTGACGACT,GGCCTGACGAGA,GGCCTGACGCGT,GGCCTGACGTGT,GGCCTGGCGAGT	209	1,1,1,1,2,2
Lib10^2_#2 3.3 ng	GGCGACGCGCAT	GGCGGCGCGCAT,GGCGTCGCGCAT	34	1,1
Lib10^2_#2 3.3 ng	GGGAGAGTAATC	GAGAGAGTAATC,GGAAGAGTAATC,GGCAGAGTAATC,GGGAGAGCAATC,GGGAGAGGAATC	154	2,1,1,1,2
Lib10^2_#2 3.3 ng	GGGATGTGATGG	GCGATGTGATGG,GGCATGTGATGG,GGGATGAGATGG,GGGATGTGGTGG,GGGATGTGTTGG,GGGGTGTGATGG	220	1,1,1,1,1,1
Lib10^2_#2 3.3 ng	GGGGGTGTGAAG	GGGGGTGTGGAG,GGGGGTGTGTAG,GTGGGTGTGAAG	75	2,1,1
Lib10^2_#2 3.3 ng	GGTACCATGTAG	GGTACCATGCAG,GGTACCATGGAG,GGTACCATGTCG,GGTACCATGTGG,GGTACCATGTTG,GGTACGATGTAG,GGTNCCATGTAG,GTTACCATGTAG	200	1,1,1,1,3,1,1,1
Lib10^2_#2 3.3 ng	GTATAGTCTATT	GCATAGTCTATT,GTATAGACTATT,GTATAGTCTAGT,GTATAGTCTATC,GTATTGTCTATT	272	1,1,1,1,2
Lib10^2_#2 3.3 ng	GTCACCGGGTTC	GTCNCCGGGTTC	72	1
Lib10^2_#2 3.3 ng	GTCGGTGGCACT	GTCGGAGGCACT,GTCGGCGGCACT,GTCGGGGGCACT,GTCGGNGGCACT,GTCGGTCGCACT,GTCGGTGGAACT,GTCNGTGGCACT,GTCTGTGGCACT	247	2,1,1,1,1,1,1,1
Lib10^2_#2 3.3 ng	GTCTCTTTGGCT	CTCTCTTTGGCT,GTCTCATTGGCT,GTCTCCTTGGCT,GTCTCTNTGGCT,GTCTCTTGGGCT	291	1,1,1,1,1
Lib10^2_#2 3.3 ng	GTGATATGAGGT	GCGATATGAGGT,GGGATATGAGGT,GTGATATGAGGG,GTGATATGGGGT,GTGATATGTGGT,GTGATGTGAGGT,GTGATTTGAGGT,GTGGTATGAGGT	291	1,3,1,3,5,1,1,1
Lib10^2_#2 3.3 ng	GTGCTTTAACTG		89
Lib10^2_#2 3.3 ng	TAAATATGCGCT	TAAATATGCCCT,TAAATATGGGCT	241	1,1
Lib10^2_#2 3.3 ng	TACAGGGGGTCG	TACAGGCGGTCG	107	1
Lib10^2_#2 3.3 ng	TACGAGATTTAT	TACGACATTTAT,TACGAGANTTAT,TACGAGGTTTAT,TACGGGATTTAT,TAGGAGATTTAT	277	2,1,2,1,1
Lib10^2_#2 3.3 ng	TACTTTTCTTAT	TACTTTTCTTTT	404	1
Lib10^2_#2 3.3 ng	TAGTCACTGCTT	TACTCACTGCTT,TAGTCACTCCTT,TAGTCACTGCCT,TAGTCACTGCTC,TAGTCACTGGTT,TAGTGACTGCTT	293	1,1,1,1,1,1
Lib10^2_#2 3.3 ng	TAGTCTTAGGTC	GAGTCTTAGGTC,TAGACTTAGGTC,TAGGCTTAGGTC,TAGTCTTAGGGC	372	1,1,1,1
Lib10^2_#2 3.3 ng	TATATGGACTTG	AATATGGACTTG,TATATAGACTTG,TATATGGACATG,TATATGGACTAG,TATATGGACTGG,TATATGGGCTTG,TATATGGTCTTG,TATATTGACTTG,TATNTGGACTTG	198	1,1,1,1,1,1,2,1,1
Lib10^2_#2 3.3 ng	TCATCGTTTGGC	TCATCGTTTCGC,TCATCGTTTGCC,TCATCGTTTGTC,TCATCNTTTGGC	367	1,1,2,1
Lib10^2_#2 3.3 ng	TCCGCTTTCGTT	GCCGCTTTCGTT	67	1
Lib10^2_#2 3.3 ng	TCCTGGCTTACT	CCCTGGCTTACT,TCCTGCCTTACT,TCCTGGCCTACT,TCCTGGCTTACA,TCCTGGCTTAGT,TCCTGGGTTACT,TCCTGTCTTACT	361	1,1,1,1,1,1,2
Lib10^2_#2 3.3 ng	TCGGAAGGACTA	TCGCAAGGACTA,TCGGAAGAACTA,TCGGAAGNACTA,TCGGANGGACTA,TCGGGAGGACTA	100	1,1,1,1,2
Lib10^2_#2 3.3 ng	TGACCGTCCAGT	TGACCGGCCAGT,TGACCGTCGAGT,TGCCCGTCCAGT,TGGCCGTCCAGT,TGTCCGTCCAGT	133	1,1,2,2,5
Lib10^2_#2 3.3 ng	TGACCTCGTGAT	AGACCTCGTGAT,TAACCTCGTGAT,TCACCTCGTGAT,TGACATCGTGAT,TGACCGCGTGAT,TGACCTCGAGAT,TGACCTCGTGCT,TGACCTCGTGGT,TGACCTNGTGAT,TGACGTCGTGAT,TGATCTCGTGAT,TGGCCTCGTGAT,TGTCCTCGTGAT,TTACCTCGTGAT	788	1,1,1,1,1,1,1,4,1,1,1,7,13,1
Lib10^2_#2 3.3 ng	TGAGTGTAGTTG	TCAGTGTAGTTG,TGACTGTAGTTG,TGAGTCTAGTTG,TGAGTGTAGTGG,TGTGTGTAGTTG	167	1,1,1,1,5
Lib10^2_#2 3.3 ng	TGATGGCGACAC	AGATGGCGACAC,TGATGACGACAC,TGATGGAGACAC,TGATGGCGGCAC,TGATGGCGTCAC,TGATGNCGACAC,TGATGTCGACAC,TGGTGGCGACAC,TGTTGGCGACAC	321	1,1,1,2,4,1,3,3,1
Lib10^2_#2 3.3 ng	TGCGAGGGTATC	TGCGAGGGAATC,TGCGAGGNTATC,TGCGTGGGTATC	97	1,1,1
Lib10^2_#2 3.3 ng	TGTCGTATGGGC	TGGCGTATGGGC,TGTCCTATGGGC	67	1,1
Lib10^2_#2 3.3 ng	TGTGTTGATGGT	AGTGTTGATGGT,TGTGATGATGGT,TGTGTTGATAGT,TGTGTTGATGAT,TGTGTTGATGGG,TGTGTTGGTGGT,TGTGTTGNTGGT,TTTGTTGATGGT	223	1,1,1,1,1,3,1,1
Lib10^2_#2 3.3 ng	TTAGTATTTGAG	TCAGTATTTGAG,TTAATATTTGAG,TTAGTATTTGTG,TTAGTTTTTGAG,TTANTATTTGAG,TTTGTATTTGAG	246	1,2,18,1,1,1
Lib10^2_#2 3.3 ng	TTAGTTGTCGCC	CTAGTTGTCGCC,TTAGTTCTCGCC,TTAGTTGACGCC,TTAGTTGNCGCC	193	1,1,1,1
Lib10^2_#2 3.3 ng	TTCACTGATTAT	TACACTGATTAT,TTCACTGATAAT,TTCACTGATGAT,TTCACTGATTCT,TTCACTGGTTAT	365	1,1,1,1,2
Lib10^2_#2 3.3 ng	TTCCATGCCTGC	GTCCATGCCTGC,TCCCATGCCTGC	153	1,1
Lib10^2_#2 3.3 ng	TTCGTAGGGGTT	TTCGTAAGGGTT,TTCGTAGGGGGT,TTCGTAGGTGTT	69	1,1,1
Lib10^2_#2 3.3 ng	TTCGTATATCTT	TTCGGATATCTT,TTCGTATAGCTT	105	1,1
Lib10^2_#2 3.3 ng	TTGCGAATTGTT	TTCCGAATTGTT,TTGCGANTTGTT,TTGCGGATTGTT	292	1,1,1
Lib10^2_#2 3.3 ng	TTGGGCAGCCTT	TTGGGCGGCCTT,TTGGGCTGCCTT	335	1,1
Lib10^2_#2 3.3 ng	TTGTTGGCTCGG	CTGTTGGCTCGG,TAGTTGGCTCGG,TTGATGGCTCGG,TTGGTGGCTCGG,TTGTCGGCTCGG,TTGTTGGCACGG,TTGTTGGCCCGG,TTGTTGGCGCGG,TTGTTGGCTCGC,TTGTTGGTTCGG,TTGTTNGCTCGG	443	2,1,2,3,1,1,1,1,1,1,1
Lib10^2_#2 3.3 ng	TTTATGTCCCGC	TTTATGTCCCCC,TTTATGTCCCGA	110	1,1
Lib10^2_#2 3.3 ng	TTTGGCGTATCG	GTTGGCGTATCG,TTGGGCGTATCG,TTTGGCGAATCG,TTTGGCGGATCG,TTTGGCGNATCG,TTTGGCGTATTG,TTTGGCGTGTCG	314	1,1,1,1,1,1,1
Lib10^2_#2 3.3 ng	TTTTATCATCGG	ATTTATCATCGG,TATTATCATCGG,TTCTATCATCGG,TTGTATCATCGG,TTTTATCATAGG,TTTTATCNTCGG	361	1,1,1,1,2,1
Lib10^2_#2 3.3 ng	TTTTGTCGCTTA	TTGTGTCGCTTA,TTTTATCGCTTA	194	1,1
Lib10^2_#2 3.3 ng	TTTTTGATTCTT	ATTTTGATTCTT,TATTTGATTCTT,TTTATGATTCTT,TTTTTGGTTCTT	277	1,1,2,2
Lib10^2_#2 10 ng	AAACGGAGCTCT	AAACGCAGCTCT,AAACGGCGCTCT,AAACGGGGCTCT,AAACGGTGCTCT,AAACGNAGCTCT,AATCGGAGCTCT,ACACGGAGCTCT,AGACGGAGCTCT,ATACGGAGCTCT	434	1,1,5,7,1,1,1,1,1
Lib10^2_#2 10 ng	AAGGGTCTTCAG	AAGAGTCTTCAG,AAGCGTCTTCAG,AAGGGTCNTCAG,AAGGGTCTCCAG,AAGGGTCTGCAG,AAGGGTCTTCCG,AAGGGTCTTCGG,AAGGGTCTTCTG,AAGGNTCTTCAG,AAGTGTCTTCAG,ATGGGTCTTCAG,GAGGGTCTTCAG	434	1,1,1,1,1,1,1,2,1,1,2,1
Lib10^2_#2 10 ng	AATGTCTGGGAG	AATGCCTGGGAG,AATGTCTGCGAG,AATGTCTGGCAG,AATGTCTGGGCG,AATGTCTGGGGG,AATGTCTGGGTG,AATGTCTGGTAG,AATGTCTGTGAG,AGTGTCTGGGAG,TATGTCTGGGAG	452	1,2,1,1,19,16,2,1,2,1
Lib10^2_#2 10 ng	ACCCAGGTTTTT	ACCCAGATTTTT,ACCCAGGGTTTT,ACCCAGGNTTTT,ACCCAGGTATTT,ACCCAGGTCTTT,ACCCAGGTTTAT,ACCCAGGTTTCT,ACCCAGGTTTGT,ACCCAGGTTTTA	279	1,2,1,1,1,2,1,3,1
Lib10^2_#2 10 ng	ACGTGAAGTACG	ACGAGAAGTACG,ACGGGAAGTACG,ACGTGAAGAACG,ACGTGAAGTACC,ACGTGAAGTTCG,ACGTGANGTACG,ACGTGGAGTACG,ACGTGTAGTACG,AGGTGAAGTACG,CCGTGAAGTACG	430	2,1,2,1,1,1,3,1,1,1
Lib10^2_#2 10 ng	AGACTGAATGTC	AGACTGAATATC,AGACTGAATGGC,AGACTGCATGTC,AGACTGGATGTC,AGACTGTATGTC,AGACTTAATGTC,AGGCTGAATGTC,AGTCTGAATGTC	507	2,1,1,5,6,1,3,1
Lib10^2_#2 10 ng	AGCGTTTTTCAA	AACGTTTTTCAA,AGCGTATTTCAA,AGCGTTATTCAA,AGCGTTTGTCAA,AGCGTTTTCCAA,AGCGTTTTGCAA,AGCGTTTTTCAC,AGCGTTTTTCAT	386	1,2,1,2,1,2,1,2
Lib10^2_#2 10 ng	AGCTGGGAGATG	AGCAGGGAGATG,AGCCGGGAGATG,AGCGGGGAGATG,AGCTCGGAGATG,AGCTGAGAGATG,AGCTGGGAGAAG,AGCTGGGAGAGG,AGCTGGGAGCTG,AGCTGGGAGGTG,AGCTGGGAGTTG,AGCTGGGCGATG,AGCTGGGGGATG,AGCTGGGNGATG,AGCTGGGTGATG,AGCTGGNAGATG,AGCTGNGAGATG,AGCTGTGAGATG,AGCTTGGAGATG,TGCTGGGAGATG	602	2,1,1,1,2,1,1,2,16,10,1,6,1,1,1,1,2,1,1
Lib10^2_#2 10 ng	AGTTCTTGGTCT	ACTTCTTGGTCT,AGATCTTGGTCT,AGGTCTTGGTCT,AGTTCNTGGTCT,AGTTCTAGGTCT,AGTTCTTGATCT,AGTTCTTGCTCT,AGTTCTTGGACT,AGTTCTTGGTCG,AGTTTTTGGTCT,TGTTCTTGGTCT	420	1,1,2,1,1,1,1,1,1,1,1
Lib10^2_#2 10 ng	ATAAGGCATAAG	ATAAGCCATAAG,ATAAGGCATACG,ATAAGGCATATG,ATAAGGCGTAAG,ATAGGGCATAAG,ATATGGCATAAG,ATCAGGCATAAG,TTAAGGCATAAG	312	1,2,6,1,1,1,1,1
Lib10^2_#2 10 ng	ATATTGGGATTC	AGATTGGGATTC,ATANTGGGATTC,ATATTGGCATTC,ATATTGGGATAC,ATATTGGGATCC,ATATTGGGATTT,ATATTGGGGTTC,ATGTTGGGATTC	333	1,1,1,1,1,1,2,1
Lib10^2_#2 10 ng	ATGTGTCGTTCC	ATGAGTCGTTCC,ATGNGTCGTTCC,ATGTGCCGTTCC,ATGTGNCGTTCC,ATGTGTCGATCC,ATGTGTCGTACC,ATGTGTCGTTAC	353	1,1,1,1,1,1,1
Lib10^2_#2 10 ng	ATGTTAGTGACG	AAGTTAGTGACG,AGGTTAGTGACG,ATATTAGTGACG,ATCTTAGTGACG,ATGGTAGTGACG,ATGTTAGAGACG,ATGTTAGTGACC,ATGTTAGTGACT,ATGTTAGTGCCG,ATGTTAGTGGCG,ATGTTAGTGTCG,ATGTTANTGACG,ATGTTCGTGACG	564	1,1,1,1,4,1,1,1,1,5,11,1,1
Lib10^2_#2 10 ng	ATTCGCTCTTCA	ATTCCCTCTTCA,ATTCGCTCATCA	94	2,1
Lib10^2_#2 10 ng	ATTGGAATGGGG	ATTGCAATGGGG,ATTGGAATGCGG,ATTGGAATGGAG,ATTGGAATGGGA,ATTGGAATGGGC,ATTGGGATGGGG,ATTGTAATGGGG	390	1,1,1,1,1,1,1
Lib10^2_#2 10 ng	ATTTGTAACTAT	ATATGTAACTAT,ATTTGAAACTAT,ATTTGNAACTAT,TTTTGTAACTAT	256	1,1,1,1
Lib10^2_#2 10 ng	ATTTTGCCGAAT	ANTTTGCCGAAT,ATTATGCCGAAT,ATTCTGCCGAAT,ATTNTGCCGAAT,ATTTAGCCGAAT,ATTTTACCGAAT,ATTTTCCCGAAT,ATTTTGCCGATT,ATTTTGCCGCAT,ATTTTGCCGGAT,ATTTTNCCGAAT,CTTTTGCCGAAT,GTTTTGCCGAAT	507	1,2,1,1,1,1,1,2,1,1,1,1,1
Lib10^2_#2 10 ng	CAACGGCTAGCG	CAAAGGCTAGCG,CAACGACTAGCG,CAACGCCTAGCG,CAACGGCAAGCG,CAACGGCNAGCG,CAACGGCTAGTG,CAACGGCTATCG,CAACGGCTCGCG,CAACGGCTGGCG,CAACGGTTAGCG,CAATGGCTAGCG,CAGCGGCTAGCG,CATCGGCTAGCG,CTACGGCTAGCG	554	1,2,1,1,1,1,1,1,1,1,2,1,1,2
Lib10^2_#2 10 ng	CACGCTACGTCT	CACCCTACGTCT,CACGCTACATCT,CACGCTACGTAT,CATGCTACGTCT	249	1,1,1,1
Lib10^2_#2 10 ng	CACTCTTGTCTT		57
Lib10^2_#2 10 ng	CAGTCGCTTTTG	CAGNCGCTTTTG,CAGTCCCTTTTG,CAGTCGCATTTG,CAGTCGCCTTTG,CAGTCGCGTTTG,CAGTCGCTTTAG,CAGTCGCTTTCG,CAGTGGCTTTTG,CGGTCGCTTTTG	298	1,1,5,7,1,1,1,2,1
Lib10^2_#2 10 ng	CATATTTGATCT	CATATATGATCT,CATATTTGACCT,CATATTTGAGCT,CATATTTGATCA,CATATTTGATCC,CATATTTGCTCT,CCTATTTGATCT	316	1,1,1,1,1,2,1
Lib10^2_#2 10 ng	CCAGTTATTTTT	ACAGTTATTTTT,CCAGTAATTTTT,CCAGTCATTTTT,CCAGTTATATTT,CCAGTTATCTTT,CCAGTTATGTTT,CCAGTTCTTTTT,CCAGTTTTTTTT,CCGGTTATTTTT,TCAGTTATTTTT	385	2,1,1,3,1,1,1,2,1,1
Lib10^2_#2 10 ng	CCATTGGCGTAT	CCACTGGCGTAT,CCATTGACGTAT,CCATTGGNGTAT,CCATTGTCGTAT	178	1,1,1,2
Lib10^2_#2 10 ng	CCCGTGTGACTT	CCAGTGTGACTT,CCCGAGTGACTT,CCCGTCTGACTT,CCCGTGAGACTT,CCCGTGGGACTT,CCCGTGTGACAT,CCCGTGTGATTT,CCCGTGTGGCTT,CCCGTGTGTCTT	255	1,1,2,1,1,1,1,2,4
Lib10^2_#2 10 ng	CCCGTTAACAGA	CCAGTTAACAGA,CCCCTTAACAGA,CCCGGTAACAGA,CCCGTNAACAGA,CCCGTTAACAGG,CCCGTTAACAGT,CCCGTTACCAGA,CTCGTTAACAGA	428	1,1,1,1,1,1,1,2
Lib10^2_#2 10 ng	CCTGCTTAGTTG	CCTGCNTAGTTG,CCTGCTTAGATG,CCTGCTTAGTCG,CCTGCTTAGTTC,CCTGCTTTGTTG,CTTGCTTAGTTG	462	1,2,1,2,1,2
Lib10^2_#2 10 ng	CGCCGGGCTTGA	CCCCGGGCTTGA,CGCCAGGCTTGA,CGCCCGGCTTGA,CGCCGGGCTTGC,CGCCGGGCTTGG,CGCCGGGCTTGT,CGCCGNGCTTGA,TGCCGGGCTTGA	356	1,1,1,3,2,1,1,1
Lib10^2_#2 10 ng	CGGTCATAGTCA	CGATCATAGTCA,CGGACATAGTCA,CGGTCATACTCA,CGGTCATAGACA,CGGTCNTAGTCA,CGGTTATAGTCA,GGGTCATAGTCA,TGGTCATAGTCA	427	3,2,1,2,1,1,1,1
Lib10^2_#2 10 ng	CGTGCCCTCGGC	CGAGCCCTCGGC,CGGGCCCTCGGC,CGTGCCCCCGGC,CGTGCCCTCGAC,CGTGCCCTCGCC,CGTGCCCTCGGG,CGTGCCCTTGGC,GGTGCCCTCGGC	495	2,1,1,1,2,1,1,1
Lib10^2_#2 10 ng	CTATCGGGGCGC	CTATCGGAGCGC,CTATCGGCGCGC,CTATCGGGGCGG,CTATCGGGGTGC,CTATCGGTGCGC,CTATCGTGGCGC,CTATNGGGGCGC	506	1,3,1,1,1,1,1
Lib10^2_#2 10 ng	CTCATCCACATT	CCCATCCACATT,CTCACCCACATT,CTCATCCACACT,CTCTTCCACATT,CTTATCCACATT,GTCATCCACATT,TTCATCCACATT	381	1,1,1,1,1,1,1
Lib10^2_#2 10 ng	CTCTGCTTTTCT	CCCTGCTTTTCT,CTCTGCTTGTCT,CTCTGGTTTTCT,CTCTTCTTTTCT	277	1,1,1,1
Lib10^2_#2 10 ng	CTCTTCACTCAT	CCCTTCACTCAT,CTCTGCACTCAT,CTCTTCACACAT,CTCTTCACTTAT	150	1,1,1,1
Lib10^2_#2 10 ng	CTGGGCACTAGG	CTGGGCACTACG,CTGGGCACTNGG,CTGGGCACTTGG,GTGGGCACTAGG,TTGGGCACTAGG	355	1,1,1,1,1
Lib10^2_#2 10 ng	CTGGGGATAGCC	CTGAGGATAGCC,CTGGGAATAGCC,CTGGGGACAGCC,CTGGGGANAGCC,CTGGGGATAGTC,CTGGGGATGGCC,CTGGGGATTGCC,CTGGGGGTAGCC,CTGTGGATAGCC,TTGGGGATAGCC	431	1,1,1,1,2,2,3,3,1,1
Lib10^2_#2 10 ng	CTTGTGTTATGT	CTTGTGATATGT,CTTGTGTTATGC	303	1,1
Lib10^2_#2 10 ng	CTTTCTCGTCGA	CCTTCTCGTCGA,CTCTCTCGTCGA,CTTACTCGTCGA,CTTCCTCGTCGA,CTTTCACGTCGA,CTTTCCCGTCGA,CTTTCGCGTCGA,CTTTCNCGTCGA,CTTTCTCATCGA,CTTTCTCGCCGA,CTTTCTCGGCGA,CTTTCTCGTCCA,CTTTCTCGTCGC,CTTTCTCGTCGG,CTTTCTCGTCGT,CTTTCTCGTTGA,CTTTTTCGTCGA,TTTTCTCGTCGA	610	1,1,1,1,2,1,1,1,1,2,1,1,2,2,3,1,1,1
Lib10^2_#2 10 ng	CTTTGCTATCCG	CTATGCTATCCG,CTGTGCTATCCG,CTTGGCTATCCG,CTTNGCTATCCG,CTTTCCTATCCG,CTTTGATATCCG,CTTTGCTAACCG,CTTTGCTATACG,CTTTGCTATCCT,CTTTGCTCTCCG,CTTTGCTGTCCG,CTTTGCTNTCCG,CTTTGCTTTCCG,CTTTGNTATCCG,CTTTGTTATCCG	421	1,1,1,1,1,1,1,1,1,1,1,1,3,1,1
Lib10^2_#2 10 ng	GAATTCCTTCCT	GAAATCCTTCCT,GAATACCTTCCT,GAATCCCTTCCT,GAATTCATTCCT,GAATTCCTACCT,GAATTCCTCCCT,GAATTCCTTCCG,GAATTCCTTCTT,GAATTCCTTTCT,GAATTGCTTCCT,GAATTTCTTCCT,GACTTCCTTCCT,GGATTCCTTCCT,GTATTCCTTCCT	475	1,1,1,1,1,2,1,1,1,1,1,1,4,3
Lib10^2_#2 10 ng	GAGACACGTGGG	CAGACACGTGGG,GAGACACGAGGG,GAGACACGTCGG,GAGACACNTGGG,GAGGCACGTGGG,GAGTCACGTGGG,GCGACACGTGGG,GTGACACGTGGG	248	1,4,1,1,1,3,1,3
Lib10^2_#2 10 ng	GAGACTGAGAAT	GAGACTGAGGAT,GAGACTGAGTAT,GAGACTGGGAAT,GAGACTGTGAAT,GAGAGTGAGAAT,GAGCCTGAGAAT,GAGGCTGAGAAT,GAGTCTGAGAAT,GTGACTGAGAAT	373	1,1,3,7,1,1,1,1,5
Lib10^2_#2 10 ng	GAGTCAGGTACT	GGGTCAGGTACT,GTGTCAGGTACT	96	1,2
Lib10^2_#2 10 ng	GATCTTTTAGTC	GATCTTATAGTC,GATCTTTTACTC,GGTCTTTTAGTC,GTTCTTTTAGTC	325	1,1,4,1
Lib10^2_#2 10 ng	GATTGTATTTGT	CATTGTATTTGT,GAGTGTATTTGT,GATAGTATTTGT,GATCGTATTTGT,GATGGTATTTGT,GATTGTACTTGT,GATTGTATTGGT,GATTGTATTTGG,GATTGTCTTTGT,GATTGTGTTTGT,GATTGTNTTTGT	399	1,1,1,1,3,1,1,1,1,1,1
Lib10^2_#2 10 ng	GCATGACGCGGC	GCATGACGCGCC,GCATGACGCGGG,GCATGACGGGGC,GCATGATGCGGC,GCATGCCGCGGC,GCATGGCGCGGC,GCATGTCGCGGC,GCGTGACGCGGC	413	1,1,1,1,1,3,7,1
Lib10^2_#2 10 ng	GCGCACCTCAAA	GCGCACCNCAAA,GCGCACCTGAAA,GCGCTCCTCAAA,GCGTACCTCAAA,TCGCACCTCAAA	188	1,1,1,1,1
Lib10^2_#2 10 ng	GCGGTCAGCGTT	GCGGTCAGCGGT,GCGGTCAGCGTC,GCGGTCAGCGTG,GCGGTCAGCTTT,GCGGTCAGGGTT,GCGGTCANCGTT	316	2,1,1,1,1,1
Lib10^2_#2 10 ng	GCGTGTTTGTCT	GCGAGTTTGTCT,GCGCGTTTGTCT,GCGTGGTTGTCT,GCGTGNTTGTCT,GCGTGTCTGTCT,GCGTGTGTGTCT,GCGTGTTGGTCT,GCGTGTTNGTCT,GCGTGTTTGACT,GCTTGTTTGTCT,GGGTGTTTGTCT	416	2,1,1,1,1,2,1,1,1,1,1
Lib10^2_#2 10 ng	GCGTTTTTGGAG	GCCTTTTTGGAG,GCGCTTTTGGAG,GCGTTGTTGGAG,GCGTTTATGGAG,GCGTTTGTGGAG,GCGTTTTTGCAG,GCGTTTTTGGAA,GCGTTTTTGGCG,GCGTTTTTGGGG,GCGTTTTTGGTG	446	1,1,1,2,2,2,1,1,20,23
Lib10^2_#2 10 ng	GCTACATGTTTG	GCTACATGATTG,GCTACATGGTTG,GCTACATGTTAG,GCTACATGTTGG,GCTACATNTTTG,GCTAGATGTTTG	337	2,1,1,1,1,1
Lib10^2_#2 10 ng	GCTACCGTTTTT	CCTACCGTTTTT,GCTACCGATTTT,GCTACCGTATTT,GCTACCGTCTTT,GCTACCGTTTAT,GCTACCGTTTTA,GCTAGCGTTTTT,GCTTCCGTTTTT	367	1,1,2,3,1,1,1,1
Lib10^2_#2 10 ng	GCTGTAAAGTTT	ACTGTAAAGTTT,CCTGTAAAGTTT,GCTGGAAAGTTT,GCTGTAAACTTT,GCTGTAAAGATT,GCTGTAAAGTCT,GCTGTAAAGTTC,GCTGTAATGTTT,TCTGTAAAGTTT	445	1,1,1,2,1,1,1,1,1
Lib10^2_#2 10 ng	GGCCTGACGAGT	GGCCCGACGAGT,GGCCTCACGAGT,GGCCTGACCAGT,GGCCTGACGAGA,GGCCTGACGCGT,GGCCTGACGGGT,GGCCTGACGTGT,GGCCTGAGGAGT,GGCCTGATGAGT,GGCCTGCCGAGT,GGCCTGGCGAGT,GGCCTGTCGAGT,GGGCTGACGAGT,GTCCTGACGAGT,TGCCTGACGAGT	308	1,2,2,1,1,3,4,1,2,1,2,1,1,1,1
Lib10^2_#2 10 ng	GGCGACGCGCAT	GCCGACGCGCAT,GGCGACGCGCAA,GGCGCCGCGCAT,GGCGGCGCGCAT,GGCGTCGCGCAT	48	1,1,2,3,1
Lib10^2_#2 10 ng	GGGAGAGTAATC	GGGAGAGAAATC,GGGAGAGGAATC,GGGAGAGTTATC,GGGAGGGTAATC,GGGAGTGTAATC,GGGGGAGTAATC,GGGTGAGTAATC	229	2,1,1,2,1,1,1
Lib10^2_#2 10 ng	GGGATGTGATGG	GAGATGTGATGG,GGGAAGTGATGG,GGGATGGGATGG,GGGATGTGACGG,GGGATGTGGTGG,GGGATGTGTTGG,GGGNTGTGATGG,GGGTTGTGATGG,GTGATGTGATGG	286	1,1,1,1,1,1,1,1,2
Lib10^2_#2 10 ng	GGGGGTGTGAAG	GGGGGGGTGAAG,GGGGGTGTGAAA,GGGGGTGTGAGG,GGGGGTGTGATG,GGGGGTGTGGAG,GGGGGTGTGTAG	110	1,1,1,1,1,3
Lib10^2_#2 10 ng	GGTACCATGTAG	GCTACCATGTAG,GGGACCATGTAG,GGTACCAGGTAG,GGTACCATGGAG,GGTACCATGTTG,GGTAGCATGTAG,GGTTCCATGTAG	259	1,1,1,2,4,1,1
Lib10^2_#2 10 ng	GTATAGTCTATT	GAATAGTCTATT,GCATAGTCTATT,GTATAGNCTATT,GTATAGTCTAAT,GTATAGTCTACT,GTATAGTCTATG,GTATAGTCTGTT,GTATAGTCTTTT,GTATTGTCTATT,GTCTAGTCTATT	379	1,1,1,1,1,1,1,3,1,1
Lib10^2_#2 10 ng	GTCACCGGGTTC	GTCACCGGGATC,GTCACCGGGCTC,GTCACCNGGTTC,GTCACGGGGTTC	117	1,1,1,1
Lib10^2_#2 10 ng	GTCGGTGGCACT	GACGGTGGCACT,GTCGATGGCACT,GTCGCTGGCACT,GTCGGAGGCACT,GTCGGGGGCACT,GTCGGTGACACT,GTCGGTGGCACC,GTCGGTGGCAGT,GTCGGTGGCATT,GTCGGTGNCACT,GTCTGTGGCACT	328	1,1,1,2,2,1,2,1,1,1,1
Lib10^2_#2 10 ng	GTCTCTTTGGCT	CTCTCTTTGGCT,GACTCTTTGGCT,GTCTCCTTGGCT,GTCTCTGTGGCT,GTCTCTTAGGCT,GTCTCTTTGACT,GTCTCTTTGGGT,GTCTTTTTGGCT	355	1,1,1,1,1,1,1,1
Lib10^2_#2 10 ng	GTGATATGAGGT	GTGAAATGAGGT,GTGATANGAGGT,GTGATATGAAGT,GTGATATGAGGG,GTGATATGGGGT,GTGATATGTGGT,GTGGTATGAGGT,GTGTTATGAGGT	443	1,1,1,2,4,4,3,1
Lib10^2_#2 10 ng	GTGCTTTAACTG	GGGCTTTAACTG,GTGCTCTAACTG,GTGCTTTAGCTG	129	1,1,1
Lib10^2_#2 10 ng	TAAATATGCGCT	TAAAAATGCGCT,TAAATAAGCGCT,TAAATATGCACT,TAAATATGCCCT,TAAATATGCTCT,TAAATATGTGCT,TAAATTTGCGCT	355	1,1,1,2,1,1,1
Lib10^2_#2 10 ng	TACAGGGGGTCG	AACAGGGGGTCG,GACAGGGGGTCG,TACAGGGGGTCT,TACAGGGGGTTG,TACATGGGGTCG	126	1,1,1,1,1
Lib10^2_#2 10 ng	TACGAGATTTAT	TACGAGATCTAT,TACGAGATGTAT,TACGAGATTTAA,TACGAGGTTTAT,TACGAGTTTTAT,TACGGGATTTAT,TACGTGATTTAT,TCCGAGATTTAT	352	1,1,1,1,1,1,2,1
Lib10^2_#2 10 ng	TACTTTTCTTAT	TACATTTCTTAT,TACGTTTCTTAT,TACTTATCTTAT,TACTTCTCTTAT,TACTTTGCTTAT,TACTTTTCTGAT,TACTTTTCTTAA,TACTTTTCTTAG,TACTTTTNTTAT,TACTTTTTTTAT,TCCTTTTCTTAT	547	1,1,1,2,1,1,1,1,1,1,1
Lib10^2_#2 10 ng	TAGTCACTGCTT	TAGCCACTGCTT,TAGTCACNGCTT,TAGTCACTGCTG,TAGTCACTGGTT,TAGTCCCTGCTT,TAGTCGCTGCTT,TAGTCTCTGCTT	479	1,1,1,1,1,1,2
Lib10^2_#2 10 ng	TAGTCTTAGGTC	GAGTCTTAGGTC,TAGGCTTAGGTC,TAGTCNTAGGTC,TAGTCTTACGTC,TAGTCTTAGCTC,TAGTCTTAGGTT,TTGTCTTAGGTC	494	1,1,1,1,1,1,1
Lib10^2_#2 10 ng	TATATGGACTTG	AATATGGACTTG,TATATCGACTTG,TATATGCACTTG,TATATGGTCTTG	309	1,1,1,1
Lib10^2_#2 10 ng	TCATCGTTTGGC	TCAACGTTTGGC,TCATCGATTGGC,TCATCGGTTGGC,TCATCGTATGGC,TCATCGTCTGGC,TCATCGTGTGGC,TCATCGTTGGGC,TCATCGTTTAGC,TCATCGTTTCGC,TCATCGTTTGGT,TCATCGTTTGTC,TCATCTTTTGGC,TCTTCGTTTGGC,TTATCGTTTGGC	467	1,2,2,1,2,1,1,1,1,1,1,1,1,1
Lib10^2_#2 10 ng	TCCGCTTTCGTT	ACCGCTTTCGTT,CCCGCTTTCGTT,TCCGCTTTCGGT	112	1,2,1
Lib10^2_#2 10 ng	TCCTGGCTTACT	ACCTGGCTTACT,GCCTGGCTTACT,TCCAGGCTTACT,TCCTGCCTTACT,TCCTGGCATACT,TCCTGGCTTAGT,TCCTGGCTTCCT,TCCTGGCTTTCT,TCCTGGGTTACT,TCCTGGNTTACT,TCCTGTCTTACT	491	2,1,1,1,1,1,2,1,1,1,1
Lib10^2_#2 10 ng	TCGGAAGGACTA	CCGGAAGGACTA,TCGGAAGGCCTA,TCGGAAGGTCTA,TCGGGAGGACTA,TCGGTAGGACTA	143	1,1,2,1,1
Lib10^2_#2 10 ng	TGACCGTCCAGT	AGACCGTCCAGT,TCACCGTCCAGT,TGACCGACCAGT,TGACCGNCCAGT,TGACCGTCCTGT,TGANCGTCCAGT,TGGCCGTCCAGT,TGTCCGTCCAGT	213	1,1,1,1,1,1,5,7
Lib10^2_#2 10 ng	TGACCTCGTGAT	GGACCTCGTGAT,TGACCCCGTGAT,TGACCGCGTGAT,TGACCTCGAGAT,TGACCTCGGGAT,TGACCTCGTAAT,TGACCTCGTGAG,TGACCTCGTGCT,TGACCTCGTGGT,TGACCTCGTGTT,TGACCTCNTGAT,TGAGCTCGTGAT,TGATCTCGTGAT,TGCCCTCGTGAT,TGGCCTCGTGAT,TGTCCTCGTGAT	1057	2,1,1,3,3,1,1,1,2,3,1,1,1,3,7,16
Lib10^2_#2 10 ng	TGAGTGTAGTTG	TGAGCGTAGTTG,TGAGTCTAGTTG,TGAGTGAAGTTG,TGAGTGGAGTTG,TGAGTGTAGCTG,TGAGTGTAGTAG,TGAGTNTAGTTG,TGTGTGTAGTTG	227	1,1,1,2,1,1,1,1
Lib10^2_#2 10 ng	TGATGGCGACAC	TGATGGCGCCAC,TGATGGCGGCAC,TGATGGCGTCAC,TGATGGCNACAC,TGATGGGGACAC,TGATGTCGACAC,TGCTGGCGACAC,TGGTGGCGACAC,TGTTGGCGACAC	419	1,6,1,1,1,1,1,3,1
Lib10^2_#2 10 ng	TGCGAGGGTATC	TGCGAGGCTATC,TGCGTGGGTATC	160	2,1
Lib10^2_#2 10 ng	TGTCGTATGGGC		103
Lib10^2_#2 10 ng	TGTGTTGATGGT	AGTGTTGATGGT,TGGGTTGATGGT,TGTGTTGATGGG,TGTGTTGGTGGT,TGTGTTGTTGGT	268	1,1,2,2,4
Lib10^2_#2 10 ng	TTAGTATTTGAG	ATAGTATTTGAG,CTAGTATTTGAG,TTAATATTTGAG,TTAGAATTTGAG,TTAGTATATGAG,TTAGTATTTGAA,TTAGTATTTGTG,TTAGTNTTTGAG	384	1,1,1,1,1,1,26,1
Lib10^2_#2 10 ng	TTAGTTGTCGCC	ATAGTTGTCGCC,TTAGATGTCGCC,TTAGGTGTCGCC,TTAGTTGCCGCC,TTAGTTGTCGCT,TTAGTTNTCGCC,TTTGTTGTCGCC	228	1,1,1,1,1,1,1
Lib10^2_#2 10 ng	TTCACTGATTAT	TACACTGATTAT,TTCACAGATTAT,TTCACNGATTAT,TTCACTGGTTAT,TTCACTGTTTAT,TTCACTNATTAT,TTCGCTGATTAT,TTCTCTGATTAT	505	2,1,1,2,2,1,1,2
Lib10^2_#2 10 ng	TTCCATGCCTGC	TACCATGCCTGC,TTCCATGCCAGC,TTCCATGCCCGC,TTCCATGCCGGC,TTCCATGCTTGC,TTCCATGNCTGC,TTCCATGTCTGC	233	1,1,2,1,1,1,1
Lib10^2_#2 10 ng	TTCGTAGGGGTT	TTCGTAGAGGTT,TTCGTAGTGGTT	112	1,1
Lib10^2_#2 10 ng	TTCGTATATCTT	TTCGCATATCTT,TTCGTATACCTT,TTCGTATAGCTT	155	1,1,1
Lib10^2_#2 10 ng	TTGCGAATTGTT	CTGCGAATTGTT,GTGCGAATTGTT,TGGCGAATTGTT,TTGCGAACTGTT,TTGCGAATGGTT,TTGCGAATTCTT,TTGCGAATTGAT,TTGCGAATTTTT,TTGCGATTTGTT,TTGCGGATTGTT,TTGTGAATTGTT	402	1,1,1,1,1,1,1,1,1,1,1
Lib10^2_#2 10 ng	TTGGGCAGCCTT	GTGGGCAGCCTT,TTGAGCAGCCTT,TTGGGCAGCCTA,TTGGGCAGTCTT,TTGGGCANCCTT,TTGGGCCGCCTT,TTGGGCTGCCTT,TTGTGCAGCCTT	443	1,1,1,1,1,2,6,2
Lib10^2_#2 10 ng	TTGTTGGCTCGG	ATGTTGGCTCGG,TAGTTGGCTCGG,TTGATGGCTCGG,TTGCTGGCTCGG,TTGGTGGCTCGG,TTGTGGGCTCGG,TTGTTGGCGCGG,TTGTTGGCTAGG,TTGTTGGCTCCG,TTGTTGGCTCGC,TTGTTGGCTTGG,TTGTTGGNTCGG	587	2,1,3,1,2,1,2,1,1,2,1,2
Lib10^2_#2 10 ng	TTTATGTCCCGC	TTTATGNCCCGC,TTTATGTCTCGC	122	1,1
Lib10^2_#2 10 ng	TTTGGCGTATCG	TTAGGCGTATCG,TTGGGCGTATCG,TTTAGCGTATCG,TTTGGCGGATCG,TTTGGCGTAGCG,TTTGGCGTATCA,TTTGGCGTATGG,TTTGGGGTATCG,TTTGGTGTATCG	394	1,1,1,1,2,1,1,2,1
Lib10^2_#2 10 ng	TTTTATCATCGG	TTCTATCATCGG,TTTAATCATCGG,TTTTAACATCGG,TTTTACCATCGG,TTTTATCAGCGG,TTTTATCATAGG,TTTTATCATCAG,TTTTATCATCGA,TTTTATTATCGG,TTTTCTCATCGG	476	1,1,1,1,1,1,2,1,1,1
Lib10^2_#2 10 ng	TTTTGTCGCTTA	TTTNGTCGCTTA,TTTTGTCCCTTA,TTTTGTCGCATA	318	1,1,1
Lib10^2_#2 10 ng	TTTTTGATTCTT	CTTTTGATTCTT,GTTTTGATTCTT,TATTTGATTCTT,TTTATGATTCTT,TTTGTGATTCTT,TTTTAGATTCTT,TTTTTGANTCTT,TTTTTGATCCTT,TTTTTGCTTCTT,TTTTTGGTTCTT,TTTTTGTTTCTT	397	1,1,1,2,1,1,2,1,1,1,1
Lib10^2_#2 33 ng	AAACGGAGCTCT	AAACGGAACTCT,AAACGGGGCTCT,AAACGGTGCTCT,AAACGNAGCTCT	371	1,2,4,1
Lib10^2_#2 33 ng	AAGGGTCTTCAG	AAGGGCCTTCAG,AAGGGGCTTCAG,AAGGGTCTGCAG,AAGGGTCTTAAG,AAGGGTCTTCAT,AAGGGTCTTCTG,AAGGGTCTTTAG,AAGGGTNTTCAG,AGGGGTCTTCAG	334	1,1,2,1,1,2,1,1,1
Lib10^2_#2 33 ng	AATGTCTGGGAG	AAAGTCTGGGAG,AATGTCTGGGGG,AATGTCTGGGTG,AATGTCTNGGAG,ACTGTCTGGGAG,ATTGTCTGGGAG	464	1,13,15,1,1,1
Lib10^2_#2 33 ng	ACCCAGGTTTTT	ACCCAAGTTTTT,ACCCACGTTTTT,ACCCAGCTTTTT,ACCCAGGTTTAT,ACCCAGGTTTCT,ACCCAGGTTTGT,ACCCAGGTTTTC,ACCCAGTTTTTT,ACCCTGGTTTTT,ACCGAGGTTTTT,ACGCAGGTTTTT,ATCCAGGTTTTT,TCCCAGGTTTTT	298	1,1,1,3,2,3,1,1,1,1,1,2,1
Lib10^2_#2 33 ng	ACGTGAAGTACG	ACGTGAAGTACT,ACGTGAAGTATG,ACGTGAAGTTCG,ACGTGAANTACG,ACGTGGAGTACG,ACGTGTAGTACG,TCGTGAAGTACG	427	1,1,1,1,1,1,1
Lib10^2_#2 33 ng	AGACTGAATGTC	AAACTGAATGTC,AGACTGAATATC,AGACTGAATGGC,AGACTGAATGTA,AGACTGANTGTC,AGACTGGATGTC,AGGCTGAATGTC,AGTCTGAATGTC,ATACTGAATGTC	463	1,1,1,1,1,4,1,3,1
Lib10^2_#2 33 ng	AGCGTTTTTCAA	AGCGTATTTCAA,AGCGTGTTTCAA,AGCGTTTTTTAA,AGGGTTTTTCAA,AGTGTTTTTCAA,CGCGTTTTTCAA,GGCGTTTTTCAA,TGCGTTTTTCAA	263	2,2,1,1,1,1,1,1
Lib10^2_#2 33 ng	AGCTGGGAGATG	AGCAGGGAGATG,AGCGGGGAGATG,AGCTGGGAGGTG,AGCTGGGAGTTG,AGCTGGGGGATG,AGCTGGGTGATG,AGCTGGNAGATG,AGCTGNGAGATG,AGCTNGGAGATG	545	1,2,4,3,6,2,1,1,1
Lib10^2_#2 33 ng	AGTTCTTGGTCT	AATTCTTGGTCT,AGTACTTGGTCT,AGTGCTTGGTCT,AGTTCTNGGTCT,AGTTCTTGCTCT,AGTTCTTGGTTT,AGTTCTTGTTCT,AGTTTTTGGTCT	349	1,1,1,1,1,1,1,1
Lib10^2_#2 33 ng	ATAAGGCATAAG	ATAAGCCATAAG,ATAAGGCAAAAG,ATAAGGCACAAG,ATAAGGCATAAA,ATAAGGCATAAC,ATAAGGCATAGG	251	1,2,1,1,1,1
Lib10^2_#2 33 ng	ATATTGGGATTC	ATATTGAGATTC,ATATTGGAATTC,ATATTGGGATCC,ATATTGGGTTTC,ATATTGTGATTC,ATATTTGGATTC,CTATTGGGATTC	286	1,1,1,1,1,1,1
Lib10^2_#2 33 ng	ATGTGTCGTTCC	ATGTGACGTTCC,ATGTGTCCTTCC,ATGTGTCGTACC,CTGTGTCGTTCC	245	1,1,1,1
Lib10^2_#2 33 ng	ATGTTAGTGACG	ATGATAGTGACG,ATGGTAGTGACG,ATGTGAGTGACG,ATGTTAGAGACG,ATGTTAGTCACG,ATGTTAGTGACA,ATGTTAGTGAGG,ATGTTAGTGCCG,ATGTTAGTGGCG,ATGTTAGTGTCG,ATGTTANTGACG,ATGTTNGTGACG,CTGTTAGTGACG	442	2,1,1,1,1,1,1,2,6,5,1,1,1
Lib10^2_#2 33 ng	ATTCGCTCTTCA		65
Lib10^2_#2 33 ng	ATTGGAATGGGG	AGTGGAATGGGG,ATTGCAATGGGG,ATTGGAATGTGG,ATTGGCATGGGG,ATTGGTATGGGG,ATTNGAATGGGG	381	1,1,1,1,1,1
Lib10^2_#2 33 ng	ATTTGTAACTAT	ATATGTAACTAT,ATTTGGAACTAT	213	1,2
Lib10^2_#2 33 ng	ATTTTGCCGAAT	ATTTTCCCGAAT,ATTTTGCCCAAT,ATTTTGCCGACT,ATTTTGCCGGAT,ATTTTGCCGTAT,ATTTTGCTGAAT,ATTTTGTCGAAT,CTTTTGCCGAAT,TTTTTGCCGAAT	443	1,1,1,2,1,1,1,1,1
Lib10^2_#2 33 ng	CAACGGCTAGCG	CAACGCCTAGCG,CAACGGCGAGCG,CAACGGCNAGCG,CAACGGCTACCG,CAACGGCTAGAG,CAACGGCTAGCC,CAACGGCTAGCT,CAACGGCTTGCG,CAACGGNTAGCG,CAACGGTTAGCG,CAACGTCTAGCG,CAATGGCTAGCG,CACCGGCTAGCG,CAGCGGCTAGCG,CATCGGCTAGCG,CTACGGCTAGCG	496	2,1,1,1,1,2,1,1,1,1,1,1,2,1,1,1
Lib10^2_#2 33 ng	CACGCTACGTCT	CACGCTACGACT,CACGTTACGTCT	225	1,1
Lib10^2_#2 33 ng	CACTCTTGTCTT	AACTCTTGTCTT	47	1
Lib10^2_#2 33 ng	CAGTCGCTTTTG	CAGACGCTTTTG,CAGTCGCATTTG,CAGTCGCCTTTG,CAGTCGCGTTTG,CAGTCGCNTTTG,CAGTCGCTTATG	254	1,5,7,4,1,1
Lib10^2_#2 33 ng	CATATTTGATCT	CATATTTGAGCT,CATATTTGCTCT	281	1,1
Lib10^2_#2 33 ng	CCAGTTATTTTT	CCAGTAATTTTT,CCAGTTATATTT,GCAGTTATTTTT,TCAGTTATTTTT	366	1,1,1,1
Lib10^2_#2 33 ng	CCATTGGCGTAT	CCTTTGGCGTAT	146	1
Lib10^2_#2 33 ng	CCCGTGTGACTT	CCCGTGAGACTT,CCCGTGTGTCTT	235	1,1
Lib10^2_#2 33 ng	CCCGTTAACAGA	CCCGATAACAGA,CCCGCTAACAGA,CCCGGTAACAGA,CCCGTTAAAAGA,CCCGTTAACAGG,CCCGTTAATAGA,CCCNTTAACAGA,CTCGTTAACAGA,GCCGTTAACAGA	358	2,1,1,1,1,1,1,1,1
Lib10^2_#2 33 ng	CCTGCTTAGTTG	CATGCTTAGTTG,CCGGCTTAGTTG,CCTGCATAGTTG,CCTGCTGAGTTG,CCTGCTNAGTTG,CCTGCTTNGTTG,CCTGTTTAGTTG	363	1,3,1,1,1,1,1
Lib10^2_#2 33 ng	CGCCGGGCTTGA	CACCGGGCTTGA,CGCCCGGCTTGA,CGCCGCGCTTGA,CGCCGGGCATGA,CGCCGGGCTAGA,CGCCGGGCTTGC,CGCCGGGCTTGG,CGCCGGGCTTGT	315	1,2,1,1,1,1,1,2
Lib10^2_#2 33 ng	CGGTCATAGTCA	CAGTCATAGTCA,CCGTCATAGTCA,CGATCATAGTCA,CGGGCATAGTCA,CGGTCAGAGTCA,CGGTCATAGGCA,CGGTCATAGTGA,CGGTCATNGTCA,CGGTCGTAGTCA	368	1,1,1,3,1,3,1,1,1
Lib10^2_#2 33 ng	CGTGCCCTCGGC	CGTGCCCTCCGC,CGTGCCCTCGGG,GGTGCCCTCGGC	441	1,1,1
Lib10^2_#2 33 ng	CTATCGGGGCGC	CTAACGGGGCGC,CTACCGGGGCGC,CTATCGAGGCGC,CTATCGGGACGC,CTATCGGGGGGC,CTATCGTGGCGC,CTATCNGGGCGC,CTATNGGGGCGC,CTCTCGGGGCGC	443	1,1,1,1,1,1,2,1,1
Lib10^2_#2 33 ng	CTCATCCACATT	CACATCCACATT,CTCACCCACATT,CTCATCCACATG,CTCATCCGCATT,CTGATCCACATT,GTCATCCACATT	290	2,1,1,1,1,1
Lib10^2_#2 33 ng	CTCTGCTTTTCT	CTCGGCTTTTCT,CTCTGCTTTCCT,CTCTGTTTTTCT	207	1,1,1
Lib10^2_#2 33 ng	CTCTTCACTCAT	ATCTTCACTCAT,CCCTTCACTCAT,CTCNTCACTCAT,CTCTTCTCTCAT	120	1,1,1,1
Lib10^2_#2 33 ng	CTGGGCACTAGG	ATGGGCACTAGG,CAGGGCACTAGG,CTGGGCACCAGG,CTGGGCACTGGG,CTGGGCCCTAGG,CTGGGNACTAGG	313	2,1,1,1,1,1
Lib10^2_#2 33 ng	CTGGGGATAGCC	CGGGGGATAGCC,CTGGGGATGGCC,CTGGGGCTAGCC,CTGGGGGTAGCC,CTGGGGTTAGCC,CTGGGTATAGCC,CTGNGGATAGCC	351	1,1,1,2,3,1,1
Lib10^2_#2 33 ng	CTTGTGTTATGT	CATGTGTTATGT,CTTGTGCTATGT,CTTGTGTTATGG,TTTGTGTTATGT	275	1,1,1,1
Lib10^2_#2 33 ng	CTTTCTCGTCGA	CATTCTCGTCGA,CGTTCTCGTCGA,CTGTCTCGTCGA,CTTACTCGTCGA,CTTTCGCGTCGA,CTTTCTCGACGA,CTTTCTCGCCGA,CTTTCTCGTCGC,CTTTCTCGTCGG,CTTTCTCGTCGT,CTTTCTCGTTGA,CTTTTTCGTCGA	545	2,1,1,1,1,1,1,1,3,1,1,1
Lib10^2_#2 33 ng	CTTTGCTATCCG	CTTTGCTATCCC,CTTTGCTATTCG,CTTTGCTCTCCG	379	2,1,1
Lib10^2_#2 33 ng	GAATTCCTTCCT	GAATCCCTTCCT,GAATGCCTTCCT,GAATTCCATCCT,GAATTCCNTCCT,GAATTCCTGCCT,GAATTNCTTCCT,GAATTTCTTCCT,GACTTCCTTCCT,GATTTCCTTCCT,GGATTCCTTCCT,GTATTCCTTCCT	397	1,1,1,1,1,1,1,1,1,5,4
Lib10^2_#2 33 ng	GAGACACGTGGG	GAGACACGTGTG,GAGACTCGTGGG,GAGCCACGTGGG,GAGGCACGTGGG,GAGTCACGTGGG,GGGACACGTGGG,GTGACACGTGGG	195	1,2,1,1,1,1,2
Lib10^2_#2 33 ng	GAGACTGAGAAT	GAGACTGAAAAT,GAGACTGAGAAG,GAGACTGAGGAT,GAGACTGAGTAT,GAGACTGGGAAT,GAGACTGTGAAT,GAGGCTGAGAAT,GAGTCTGAGAAT,GGGACTGAGAAT	297	1,1,1,1,4,4,1,1,3
Lib10^2_#2 33 ng	GAGTCAGGTACT	GGGTCAGGTACT,GTGTCAGGTACT	97	3,2
Lib10^2_#2 33 ng	GATCTTTTAGTC	GATCNTTTAGTC,GATCTATTAGTC,GATCTNTTAGTC,GATCTTATAGTC,GATCTTTTAGGC,GGTCTTTTAGTC	276	1,1,1,1,1,1
Lib10^2_#2 33 ng	GATTGTATTTGT	CATTGTATTTGT,GATNGTATTTGT,GATTGAATTTGT,GATTGTANTTGT,GATTGTATTTGA,GATTGTATTTGC,GGTTGTATTTGT	383	1,1,1,1,1,1,2
Lib10^2_#2 33 ng	GCATGACGCGGC	ACATGACGCGGC,GCATGACCCGGC,GCATGACGCGCC,GCATGACGCGGT,GCATGACNCGGC,GCATGGCGCGGC,GCATGTCGCGGC	377	1,1,1,1,1,2,6
Lib10^2_#2 33 ng	GCGCACCTCAAA	GCGAACCTCAAA,GCGCTCCTCAAA	149	1,1
Lib10^2_#2 33 ng	GCGGTCAGCGTT	GCAGTCAGCGTT,GCGGACAGCGTT,GCGGTCAGCGAT,GCGGTCAGCGTG,GCGGTCAGGGTT,GCGGTGAGCGTT	307	1,1,1,1,1,1
Lib10^2_#2 33 ng	GCGTGTTTGTCT	GCGGGTTTGTCT,GCGTGATTGTCT,GCGTGTATGTCT,GCGTGTGTGTCT,GCGTGTTTGACT,GCGTGTTTGTGT,GCGTTTTTGTCT,GCTTGTTTGTCT	381	3,1,1,1,1,1,1,1
Lib10^2_#2 33 ng	GCGTTTTTGGAG	GCGATTTTGGAG,GCGGTTTTGGAG,GCGTATTTGGAG,GCGTGTTTGGAG,GCGTTTNTGGAG,GCGTTTTAGGAG,GCGTTTTGGGAG,GCGTTTTTGCAG,GCGTTTTTGGCG,GCGTTTTTGGGG,GCGTTTTTGGTG	402	1,2,1,1,1,2,1,1,1,15,5
Lib10^2_#2 33 ng	GCTACATGTTTG	GCTACATGTTTC	282	1
Lib10^2_#2 33 ng	GCTACCGTTTTT	GCTACCGTATTT,GCTACCGTGTTT,GCTACCGTTGTT,GCTCCCGTTTTT,GCTTCCGTTTTT	316	8,1,1,1,1
Lib10^2_#2 33 ng	GCTGTAAAGTTT	GCCGTAAAGTTT,GCTGAAAAGTTT,GCTGTAAAGCTT,GCTGTAAAGGTT,GCTGTAAAGTAT,GCTGTAAGGTTT,GCTGTAANGTTT,GCTGTATAGTTT,GCTGTNAAGTTT,GGTGTAAAGTTT	384	1,1,1,1,1,1,1,1,1,1
Lib10^2_#2 33 ng	GGCCTGACGAGT	GGCCTGACCAGT,GGCCTGACGAGC,GGCCTGACGGGT,GGCCTGACGTGT,GGCCTGANGAGT,GGCCTGCCGAGT,GGCCTGGCGAGT,GGCCTGTCGAGT	296	1,1,2,3,2,1,1,5
Lib10^2_#2 33 ng	GGCGACGCGCAT	GGCAACGCGCAT,GGCGTCGCGCAT	47	1,1
Lib10^2_#2 33 ng	GGGAGAGTAATC	GGGAGANTAATC,GGGAGTGTAATC,GGGTGAGTAATC	186	1,1,1
Lib10^2_#2 33 ng	GGGATGTGATGG	GCGATGTGATGG,GGCATGTGATGG,GGGATGGGATGG,GGGATGTGGTGG,GGGTTGTGATGG,GTGATGTGATGG	235	1,1,1,1,1,1
Lib10^2_#2 33 ng	GGGGGTGTGAAG	GGGGGTGTGAGG,GGGGGTGTGATG,GGGGGTGTGGAG	95	1,2,1
Lib10^2_#2 33 ng	GGTACCATGTAG	GGTACCAGGTAG,GGTACCATGAAG,GGTACCATGTAT,GGTACCATGTTG	227	1,1,1,1
Lib10^2_#2 33 ng	GTATAGTCTATT	GTATACTCTATT,GTATAGACTATT,GTATAGTCTAGT	317	1,2,1
Lib10^2_#2 33 ng	GTCACCGGGTTC	GTCACCCGGTTC,GTCACCGCGTTC,GTCACCGGGCTC,GTCACCGGGGTC,GTCACCGGGTAC,GTCACCGGGTCC,GTCACCGGGTTT,GTCCCCGGGTTC	125	1,1,1,1,1,1,1,1
Lib10^2_#2 33 ng	GTCGGTGGCACT	GACGGTGGCACT,GCCGGTGGCACT,GTCGGAGGCACT,GTCGGGGGCACT,GTCGGTGGCGCT,GTCGGTGGGACT,GTTGGTGGCACT	321	1,1,1,5,1,2,1
Lib10^2_#2 33 ng	GTCTCTTTGGCT	GTCGCTTTGGCT,GTCTCCTTGGCT,GTCTCTTGGGCT,GTCTCTTTCGCT,GTCTCTTTGCCT,TTCTCTTTGGCT	329	1,1,1,1,1,1
Lib10^2_#2 33 ng	GTGATATGAGGT	ATGATATGAGGT,GGGATATGAGGT,GTGATATGAGGA,GTGATATGAGNT,GTGATATGGGGT,GTGATATGTGGT,TTGATATGAGGT	359	1,2,2,1,4,4,1
Lib10^2_#2 33 ng	GTGCTTTAACTG	GTGCTTTGACTG	120	1
Lib10^2_#2 33 ng	TAAATATGCGCT	GAAATATGCGCT,TAAAGATGCGCT,TAAATATGCCCT	309	1,1,1
Lib10^2_#2 33 ng	TACAGGGGGTCG	TACAGCGGGTCG,TACAGGGGGACG,TACAGGGGGGCG	120	1,1,1
Lib10^2_#2 33 ng	TACGAGATTTAT	AACGAGATTTAT,TACGAGCTTTAT,TACGAGNTTTAT,TACGANATTTAT,TACGTGATTTAT,TTCGAGATTTAT	290	1,1,2,1,1,1
Lib10^2_#2 33 ng	TACTTTTCTTAT	TACTTTACTTAT,TACTTTCCTTAT,TACTTTGCTTAT,TACTTTTCTTAA,TACTTTTGTTAT,TAGTTTTCTTAT	466	1,1,1,1,1,1
Lib10^2_#2 33 ng	TAGTCACTGCTT	TAGCCACTGCTT,TAGTCACTGCTA,TAGTCACTGCTG,TAGTCANTGCTT,TAGTCCCTGCTT,TAGTCGCTGCTT	369	1,2,1,1,2,1
Lib10^2_#2 33 ng	TAGTCTTAGGTC	GAGTCTTAGGTC,TAGTCATAGGTC,TAGTCTTAGATC,TAGTCTTAGCTC,TAGTCTTAGGCC,TAGTCTTAGGTG,TAGTCTTAGGTT	400	1,1,1,1,1,1,1
Lib10^2_#2 33 ng	TATATGGACTTG	TATATGGACATG,TATATGGACGTG,TATATGGACTGG,TATATGGGCTTG,TATATGGTCTTG,TATATGTACTTG	232	1,1,1,2,3,1
Lib10^2_#2 33 ng	TCATCGTTTGGC	ACATCGTTTGGC,TCATCCTTTGGC,TCATCGGTTGGC,TCATCGTTTAGC,TCATCGTTTGGT,TCATTGTTTGGC	381	1,1,1,1,2,1
Lib10^2_#2 33 ng	TCCGCTTTCGTT	TCCGCTTTCGTC	76	1
Lib10^2_#2 33 ng	TCCTGGCTTACT	GCCTGGCTTACT,TACTGGCTTACT,TCCAGGCTTACT,TCCTGACTTACT,TCCTGGCATACT	430	2,1,1,1,1
Lib10^2_#2 33 ng	TCGGAAGGACTA	CCGGAAGGACTA,GCGGAAGGACTA,TCGGTAGGACTA	112	1,1,1
Lib10^2_#2 33 ng	TGACCGTCCAGT	TCACCGTCCAGT,TGACCGTCTAGT,TGACGGTCCAGT,TGCCCGTCCAGT,TGGCCGTCCAGT,TGTCCGTCCAGT	179	1,1,1,2,2,4
Lib10^2_#2 33 ng	TGACCTCGTGAT	GGACCTCGTGAT,TAACCTCGTGAT,TGACCTCCTGAT,TGACCTCGAGAT,TGACCTCGGGAT,TGACCTCGTGGT,TGACCTCGTGTT,TGACCTTGTGAT,TGACTTCGTGAT,TGCCCTCGTGAT,TGGCCTCGTGAT,TGTCCTCGTGAT	911	1,2,1,2,1,5,4,1,1,2,7,10
Lib10^2_#2 33 ng	TGAGTGTAGTTG	TGAGTGGAGTTG,TGAGTGTACTTG,TGAGTGTAGATG,TGAGTGTAGTGG,TGAGTGTAGTTA,TGGGTGTAGTTG,TGTGTGTAGTTG	200	1,1,2,1,1,1,1
Lib10^2_#2 33 ng	TGATGGCGACAC	AGATGGCGACAC,GGATGGCGACAC,TGATGACGACAC,TGATGGAGACAC,TGATGGCGGCAC,TGATGGCGTCAC,TGGTGGCGACAC,TTATGGCGACAC	365	1,1,1,1,2,1,1,1
Lib10^2_#2 33 ng	TGCGAGGGTATC	TCCGAGGGTATC,TGCGAGGCTATC,TGCGAGGGAATC,TGCGAGGGTAGC,TGCGAGGGTATG,TGCGAGTGTATC,TGCGGGGGTATC,TGCGTGGGTATC,TGGGAGGGTATC	124	1,1,1,1,1,1,1,1,1
Lib10^2_#2 33 ng	TGTCGTATGGGC	TATCGTATGGGC	63	1
Lib10^2_#2 33 ng	TGTGTTGATGGT	TCTGTTGATGGT,TGAGTTGATGGT,TGTGATGATGGT,TGTGCTGATGGT,TGTGTTGGTGGT,TGTGTTGTTGGT	260	1,1,1,1,2,1
Lib10^2_#2 33 ng	TTAGTATTTGAG	TCAGTATTTGAG,TTAGTATNTGAG,TTAGTATTTGGG,TTAGTCTTTGAG,TTATTATTTGAG,TTCGTATTTGAG	298	1,1,22,1,1,1
Lib10^2_#2 33 ng	TTAGTTGTCGCC	TTAGTTGGCGCC,TTAGTTGTCGCT,TTAGTTGTTGCC,TTAGTTNTCGCC	216	2,1,1,1
Lib10^2_#2 33 ng	TTCACTGATTAT	ATCACTGATTAT,GTCACTGATTAT,TTCAATGATTAT,TTCACTGAGTAT,TTCACTGGTTAT,TTCACTGTTTAT,TTCAGTGATTAT,TTCGCTGATTAT,TTTACTGATTAT	400	1,1,1,1,3,1,1,1,1
Lib10^2_#2 33 ng	TTCCATGCCTGC	GTCCATGCCTGC,TACCATGCCTGC,TTCCATGCCGGC,TTCCCTGCCTGC,TTCCTTGCCTGC,TTCTATGCCTGC	204	1,1,1,1,1,1
Lib10^2_#2 33 ng	TTCGTAGGGGTT	TTCGTAGAGGTT,TTCGTAGGGCTT,TTCGTAGGGGCT	90	1,1,1
Lib10^2_#2 33 ng	TTCGTATATCTT	GTCGTATATCTT,TGCGTATATCTT,TTCGAATATCTT,TTCGTATATCTC,TTCNTATATCTT	118	1,1,1,1,1
Lib10^2_#2 33 ng	TTGCGAATTGTT	TTGCGAAATGTT,TTGCGAATTGGT,TTGCGACTTGTT,TTGCGTATTGTT	355	1,2,2,2
Lib10^2_#2 33 ng	TTGGGCAGCCTT	GTGGGCAGCCTT,TAGGGCAGCCTT,TTGGACAGCCTT,TTGGGCAGCATT,TTGGGCAGCCTC,TTGGGCAGCGTT,TTGGGCAGGCTT,TTGGGCTGCCTT,TTGGGNAGCCTT,TTGGTCAGCCTT	371	1,1,1,1,1,1,2,2,1,1
Lib10^2_#2 33 ng	TTGTTGGCTCGG	TAGTTGGCTCGG,TTGGTGGCTCGG,TTGTTGGCTCCG,TTGTTGNCTCGG,TTGTTGTCTCGG	521	2,1,1,1,1
Lib10^2_#2 33 ng	TTTATGTCCCGC	TTTATGTNCCGC	124	1
Lib10^2_#2 33 ng	TTTGGCGTATCG	ATTGGCGTATCG,TTAGGCGTATCG,TTTGGCGTATCA,TTTGGCGTATCC,TTTGGCGTTTCG,TTTGGNGTATCG,TTTGGTGTATCG	347	1,1,1,1,2,1,1
Lib10^2_#2 33 ng	TTTTATCATCGG	CTTTATCATCGG,TTCTATCATCGG,TTGTATCATCGG,TTTAATCATCGG,TTTNATCATCGG,TTTTATCATCCG,TTTTATCATCGA,TTTTATCATCGC,TTTTATCATCTG	411	1,1,1,1,1,2,1,1,1
Lib10^2_#2 33 ng	TTTTGTCGCTTA	ATTTGTCGCTTA,TGTTGTCGCTTA,TTGTGTCGCTTA,TTTTGACGCTTA,TTTTGGCGCTTA,TTTTGTCCCTTA,TTTTGTGGCTTA	236	1,1,1,1,1,1,1
Lib10^2_#2 33 ng	TTTTTGATTCTT	TTATTGATTCTT,TTGTTGATTCTT,TTTATGATTCTT,TTTGTGATTCTT,TTTNTGATTCTT,TTTTTGGTTCTT,TTTTTGTTTCTT	345	1,1,2,2,1,1,1
Lib10^2_#2 100 ng	AAACGGAGCTCT	AAACGGAGCACT,AAACGGAGCCCT,AAACGGAGCTTT,AAACGGGGCTCT,AAACGGTGCTCT,AAACGTAGCTCT,ACACGGAGCTCT,AGACGGAGCTCT	280	1,1,1,2,4,1,1,1
Lib10^2_#2 100 ng	AAGGGTCTTCAG	AAGCGTCTTCAG,AAGGATCTTCAG,AAGGGGCTTCAG,AAGGGTCTTCAA,AAGGGTCTTCCG,AAGGGTCTTCTG,AAGGGTCTTGAG,CAGGGTCTTCAG	307	1,1,1,1,2,4,1,1
Lib10^2_#2 100 ng	AATGTCTGGGAG	AATGACTGGGAG,AATGGCTGGGAG,AATGTCTGGGGG,AATGTCTGGGTG,AATGTCTGGTAG,AATGTTTGGGAG,TATGTCTGGGAG	381	1,2,12,9,1,1,1
Lib10^2_#2 100 ng	ACCCAGGTTTTT	ACCCACGTTTTT,ACCCAGCTTTTT,ACCCAGGTTTAT,ACCCAGGTTTCT,ACCCAGGTTTGT	226	1,1,1,1,1
Lib10^2_#2 100 ng	ACGTGAAGTACG	ACGAGAAGTACG,ACGGGAAGTACG,ACGTCAAGTACG,ACGTGANGTACG,ACGTGGAGTACG,ACGTGTAGTACG,ATGTGAAGTACG,TCGTGAAGTACG	335	2,1,1,1,1,1,1,1
Lib10^2_#2 100 ng	AGACTGAATGTC	ACACTGAATGTC,AGACTGAATGTT,AGACTGAGTGTC,AGACTGCATGTC,AGACTGGATGTC,AGACTGTATGTC,AGANTGAATGTC,AGATTGAATGTC,AGTCTGAATGTC	399	1,1,1,1,4,2,1,2,3
Lib10^2_#2 100 ng	AGCGTTTTTCAA	AGAGTTTTTCAA,AGCCTTTTTCAA,AGCGGTTTTCAA,AGCGTCTTTCAA,AGCGTGTTTCAA,AGTGTTTTTCAA,ATCGTTTTTCAA	233	1,1,1,1,1,1,1
Lib10^2_#2 100 ng	AGCTGGGAGATG	AGCGGGGAGATG,AGCTGGGACATG,AGCTGGGAGAAG,AGCTGGGAGGTG,AGCTGGGAGTTG,AGCTGGGGGATG	400	1,1,1,9,1,7
Lib10^2_#2 100 ng	AGTTCTTGGTCT	AGTCCTTGGTCT,AGTGCTTGGTCT,AGTTCTTNGTCT	292	1,2,1
Lib10^2_#2 100 ng	ATAAGGCATAAG	ATAAGGCATACG,ATAAGGCATAGG,ATAAGGCATATG,ATAGGGCATAAG,ATATGGCATAAG	203	1,1,1,1,1
Lib10^2_#2 100 ng	ATATTGGGATTC	ACATTGGGATTC,ATATTGAGATTC,ATATTGCGATTC,ATATTGGGAGTC,ATATTGGGATAC,ATATTGGGATCC,ATATTGGGATTT,ATATTGGGCTTC,ATATTGGGGTTC,ATATTGGGTTTC	234	1,1,1,1,2,1,1,1,1,1
Lib10^2_#2 100 ng	ATGTGTCGTTCC	ATGTGNCGTTCC,ATGTGTCGTACC,ATGTGTCGTTGC,ATGTGTTGTTCC	207	1,3,2,1
Lib10^2_#2 100 ng	ATGTTAGTGACG	AAGTTAGTGACG,ATGGTAGTGACG,ATGTTAGCGACG,ATGTTAGTGGCG,ATGTTAGTGNCG,ATGTTAGTGTCG	387	1,2,1,4,1,9
Lib10^2_#2 100 ng	ATTCGCTCTTCA		49
Lib10^2_#2 100 ng	ATTGGAATGGGG	ATTGAAATGGGG,ATTGGGATGGGG,ATTGGTATGGGG,ATTGTAATGGGG,GTTGGAATGGGG	284	2,1,1,1,1
Lib10^2_#2 100 ng	ATTTGTAACTAT	ATTTGTAACNAT,ATTTGTTACTAT	189	1,1
Lib10^2_#2 100 ng	ATTTTGCCGAAT	ATCTTGCCGAAT,ATTNTGCCGAAT,ATTTTACCGAAT,ATTTTGCCGGAT,ATTTTGNCGAAT,ATTTTGTCGAAT,ATTTTNCCGAAT,GTTTTGCCGAAT,TTTTTGCCGAAT	337	1,1,1,1,2,1,1,1,1
Lib10^2_#2 100 ng	CAACGGCTAGCG	CAACGGCAAGCG,CAACGGCCAGCG,CAACGGCTAGCT,CAACGGCTAGGG,CAACGGCTGGCG,CAACGGGTAGCG,CATCGGCTAGCG	427	1,1,2,1,1,1,1
Lib10^2_#2 100 ng	CACGCTACGTCT	CACGCTATGTCT,CTCGCTACGTCT	161	1,1
Lib10^2_#2 100 ng	CACTCTTGTCTT		50
Lib10^2_#2 100 ng	CAGTCGCTTTTG	CAGTCGCATTTG,CAGTCGCCTTTG,CAGTCGCGTTTG	246	6,7,1
Lib10^2_#2 100 ng	CATATTTGATCT	CATATTTGATGT,CATATTTGGTCT,TATATTTGATCT	196	1,1,1
Lib10^2_#2 100 ng	CCAGTTATTTTT	CCAGGTATTTTT,CCAGTAATTTTT,CCAGTTATATTT,CCAGTTATGTTT,GCAGTTATTTTT	270	1,1,1,1,1
Lib10^2_#2 100 ng	CCATTGGCGTAT	CCATTGGCGAAT,CCATTGGCGTAA	126	1,1
Lib10^2_#2 100 ng	CCCGTGTGACTT	CCCGTGTGTCTT,CCCNTGTGACTT	163	2,1
Lib10^2_#2 100 ng	CCCGTTAACAGA	CCCGGTAACAGA,CCCGTGAACAGA,CCCGTTAACAGG,CCCGTTTACAGA	310	1,1,2,1
Lib10^2_#2 100 ng	CCTGCTTAGTTG	CCTGCTAAGTTG,CCTGCTTAGATG,CCTGCTTAGTTT,CCTGTTTAGTTG,CCTNCTTAGTTG,GCTGCTTAGTTG	292	1,1,1,1,1,1
Lib10^2_#2 100 ng	CGCCGGGCTTGA	AGCCGGGCTTGA,CGCCGGCCTTGA,CGCCGGGCTTGG,CGCCGGGCTTGT,CGCCGGTCTTGA,CGCCGNGCTTGA	252	1,1,1,4,1,2
Lib10^2_#2 100 ng	CGGTCATAGTCA	CCGTCATAGTCA,CGGTCAAAGTCA,CGGTCACAGTCA,CGGTCANAGTCA,CGGTCATAGTCT	307	2,1,1,1,1
Lib10^2_#2 100 ng	CGTGCCCTCGGC	CGTGCCCTCGCC,CGTGCCCTCGGT,CGTGCCNTCGGC,CGTGCGCTCGGC	356	1,1,1,1
Lib10^2_#2 100 ng	CTATCGGGGCGC	CTAACGGGGCGC,CTATCCGGGCGC,CTATCGGGCCGC,CTATCGTGGCGC,CTATGGGGGCGC,CTATTGGGGCGC,CTGTCGGGGCGC	365	1,2,1,1,1,1,1
Lib10^2_#2 100 ng	CTCATCCACATT	CGCATCCACATT,CTCATCCACATA,GTCATCCACATT	267	1,1,1
Lib10^2_#2 100 ng	CTCTGCTTTTCT	CTCNGCTTTTCT,CTCTCCTTTTCT,CTCTGGTTTTCT,TTCTGCTTTTCT	182	1,1,1,1
Lib10^2_#2 100 ng	CTCTTCACTCAT	CTCNTCACTCAT,CTCTTCACTTAT	98	1,1
Lib10^2_#2 100 ng	CTGGGCACTAGG	CTGGGCACTACG,CTGGGCACTTGG,CTGGGGACTAGG,CTGGTCACTAGG,GTGGGCACTAGG	265	1,1,2,1,1
Lib10^2_#2 100 ng	CTGGGGATAGCC	CTGAGGATAGCC,CTGGGGATGGCC,CTGGGGATTGCC,CTGGGGGTAGCC,CTGGGGTTAGCC,CTGGGNATAGCC,CTGGGTATAGCC,CTGTGGATAGCC	282	1,1,1,1,3,1,1,1
Lib10^2_#2 100 ng	CTTGTGTTATGT	CTTGGGTTATGT,CTTGTGCTATGT,CTTGTGGTATGT,CTTGTGTCATGT,CTTGTGTTATGA,CTTGTGTTATGG,GTTGTGTTATGT	208	1,1,1,2,1,1,1
Lib10^2_#2 100 ng	CTTTCTCGTCGA	CTTNCTCGTCGA,CTTTCTCGGCGA,CTTTCTCGTCCA,CTTTCTCGTCGG,CTTTCTCGTCGT,CTTTCTCGTTGA,CTTTGTCGTCGA	411	1,2,1,2,4,1,1
Lib10^2_#2 100 ng	CTTTGCTATCCG	CATTGCTATCCG,CTTTGCTATACG,CTTTGCTGTCCG,CTTTGCTNTCCG	271	1,1,1,1
Lib10^2_#2 100 ng	GAATTCCTTCCT	CAATTCCTTCCT,GAATTCNTTCCT,GGATTCCTTCCT	313	1,1,1
Lib10^2_#2 100 ng	GAGACACGTGGG	GAGACACGAGGG,GAGACACGGGGG,GAGTCACGTGGG,GCGACACGTGGG,GGGACACGTGGG	183	3,1,1,1,1
Lib10^2_#2 100 ng	GAGACTGAGAAT	GAGACTGAGAGT,GAGACTGAGATT,GAGACTGAGGAT,GAGACTGGGAAT,GAGACTGTGAAT,GAGGCTGAGAAT,GAGTCTGAGAAT,GGGACTGAGAAT,GTGACTGAGAAT	265	1,1,2,1,5,1,3,2,6
Lib10^2_#2 100 ng	GAGTCAGGTACT	GAGACAGGTACT,GAGCCAGGTACT,GAGGCAGGTACT,GAGTCAGGAACT,GAGTCAGGGACT,GGGTCAGGTACT,GTGTCAGGTACT	86	1,1,1,1,1,1,1
Lib10^2_#2 100 ng	GATCTTTTAGTC	GATCTTTTAGTT,GATTTTTTAGTC,GGTCTTTTAGTC,GTTCTTTTAGTC	223	1,1,2,2
Lib10^2_#2 100 ng	GATTGTATTTGT	GATTGAATTTGT,GATTGTACTTGT,GATTGTATTTCT,GATTGTATTTGA,GATTGTATTTGG,GATTGTTTTTGT,GTTTGTATTTGT	284	1,1,1,2,1,1,1
Lib10^2_#2 100 ng	GCATGACGCGGC	GCATGAAGCGGC,GCATGACGCAGC,GCATGACGCGAC,GCATGACGCGGA,GCATGCCGCGGC,GCATGGCGCGGC,GCATGTCGCGGC	314	1,1,1,1,1,1,3
Lib10^2_#2 100 ng	GCGCACCTCAAA		124
Lib10^2_#2 100 ng	GCGGTCAGCGTT	GCGGCCAGCGTT,GCGGGCAGCGTT,GCGGTCAGGGTT,GCGGTCTGCGTT,GTGGTCAGCGTT	235	1,1,1,1,1
Lib10^2_#2 100 ng	GCGTGTTTGTCT	GCGGGTTTGTCT,GCGTGATTGTCT,GCGTGTTTGACT,GCGTGTTTGTAT,GCGTGTTTGTCA,GGGTGTTTGTCT,GTGTGTTTGTCT	311	4,1,1,1,1,1,1
Lib10^2_#2 100 ng	GCGTTTTTGGAG	GCCTTTTTGGAG,GCGATTTTGGAG,GCGGTTTTGGAG,GCGTATTTGGAG,GCGTTTTCGGAG,GCGTTTTNGGAG,GCGTTTTTGGGG,GTGTTTTTGGAG	281	1,2,1,1,1,1,17,1
Lib10^2_#2 100 ng	GCTACATGTTTG	GCTACATGGTTG,GCTACATGTCTG,GCTACATNTTTG,GCTATATGTTTG,GCTCCATGTTTG	232	1,1,1,1,1
Lib10^2_#2 100 ng	GCTACCGTTTTT	GCTACCATTTTT,GCTACCGTATTT,GCTACCGTCTTT,GCTACCGTGTTT,GCTACCGTTATT,GCTACCGTTCTT	244	1,3,3,1,1,1
Lib10^2_#2 100 ng	GCTGTAAAGTTT	GCTGAAAAGTTT,GCTGGAAAGTTT,GCTGTAAAGGTT,GCTGTAAAGTAT,GCTGTAACGTTT,GCTGTAAGGTTT,GCTGTACAGTTT,GTTGTAAAGTTT	325	1,1,1,1,1,1,1,1
Lib10^2_#2 100 ng	GGCCTGACGAGT	CGCCTGACGAGT,GGCCTGACGAGG,GGCCTGACGGGT,GGCCTGACGTGT,GGCCTGATGAGT,GGCTTGACGAGT	226	1,3,1,2,1,1
Lib10^2_#2 100 ng	GGCGACGCGCAT	GGCGGCGCGCAT	34	1
Lib10^2_#2 100 ng	GGGAGAGTAATC	GGGAGAGGAATC,GGGAGAGTAATT,GGGAGAGTACTC,GGGAGTGTAATC,GGGTGAGTAATC,GTGAGAGTAATC	151	1,1,1,1,1,1
Lib10^2_#2 100 ng	GGGATGTGATGG	GGGATGNGATGG,GGGATGTGGTGG,GGGATGTGTTGG	204	1,1,1
Lib10^2_#2 100 ng	GGGGGTGTGAAG	GGAGGTGTGAAG,GGGCGTGTGAAG,GGGGGTGTGAGG,GGGGGTGTGATG	82	1,1,1,2
Lib10^2_#2 100 ng	GGTACCATGTAG	GGGACCATGTAG,GGTACCATGAAG,GGTACCATGTTG,GGTACNATGTAG,GGTTCCATGTAG	174	1,1,1,1,1
Lib10^2_#2 100 ng	GTATAGTCTATT	GTATAGACTATT,GTATAGTCTACT,GTCTAGTCTATT	253	1,1,1
Lib10^2_#2 100 ng	GTCACCGGGTTC	GTCACCGGGATC,GTCAGCGGGTTC	81	1,1
Lib10^2_#2 100 ng	GTCGGTGGCACT	GACGGTGGCACT,GTCAGTGGCACT,GTCCGTGGCACT,GTCGGAGGCACT,GTCGGGGGCACT,GTCGGNGGCACT,GTCGGTGCCACT,GTCGGTGGCAAT	263	1,1,1,1,2,1,1,1
Lib10^2_#2 100 ng	GTCTCTTTGGCT	ATCTCTTTGGCT,GGCTCTTTGGCT,GTATCTTTGGCT,GTCTCTTCGGCT,GTCTTTTTGGCT	240	1,1,1,1,1
Lib10^2_#2 100 ng	GTGATATGAGGT	GAGATATGAGGT,GGGATATGAGGT,GTCATATGAGGT,GTGATATGAGGA,GTGATATGAGGC,GTGATATGAGGG,GTGATATGGGGT,GTGATATGTGGT,GTGCTATGAGGT,GTGGTATGAGGT	306	1,1,1,1,1,1,2,2,1,2
Lib10^2_#2 100 ng	GTGCTTTAACTG	GTGCCTTAACTG	105	1
Lib10^2_#2 100 ng	TAAATATGCGCT	TAAATATGCACT,TAAATATGCCCT,TAAATATGCGGT,TATATATGCGCT	236	1,1,1,1
Lib10^2_#2 100 ng	TACAGGGGGTCG	TACAGCGGGTCG,TACAGGGGATCG,TACAGGGNGTCG	107	1,1,1
Lib10^2_#2 100 ng	TACGAGATTTAT	TACGAAATTTAT,TACGACATTTAT,TACGAGATTGAT,TACGGGATTTAT,TACGTGATTTAT,TAGGAGATTTAT	246	1,1,1,1,3,1
Lib10^2_#2 100 ng	TACTTTTCTTAT	TACTTTACTTAT,TACTTTNCTTAT,TACTTTTTTTAT,TTCTTTTCTTAT	364	1,1,1,1
Lib10^2_#2 100 ng	TAGTCACTGCTT	TAGTCACTGCTA,TAGTCACTGNTT,TAGTCAGTGCTT,TAGTCANTGCTT	330	1,1,1,1
Lib10^2_#2 100 ng	TAGTCTTAGGTC	TAATCTTAGGTC,TAGACTTAGGTC,TAGNCTTAGGTC,TAGTCTTAGCTC,TAGTCTTTGGTC	344	1,1,1,1,1
Lib10^2_#2 100 ng	TATATGGACTTG	TATACGGACTTG,TATATCGACTTG,TATATGGGCTTG,TATATGGTCTTG	195	1,1,1,2
Lib10^2_#2 100 ng	TCATCGTTTGGC	TCACCGTTTGGC,TCATCGGTTGGC,TCATCGTGTGGC	312	1,2,1
Lib10^2_#2 100 ng	TCCGCTTTCGTT	ACCGCTTTCGTT,TACGCTTTCGTT,TCCACTTTCGTT,TCCGCTTTCGGT	77	1,1,1,1
Lib10^2_#2 100 ng	TCCTGGCTTACT	TCCTGGCATACT,TCCTGGCTGACT	354	1,1
Lib10^2_#2 100 ng	TCGGAAGGACTA	TCGAAAGGACTA,TCGGAAGGTCTA	91	1,1
Lib10^2_#2 100 ng	TGACCGTCCAGT	TGGCCGTCCAGT,TGTCCGTCCAGT	124	5,6
Lib10^2_#2 100 ng	TGACCTCGTGAT	AGACCTCGTGAT,TAACCTCGTGAT,TCACCTCGTGAT,TGACCGCGTGAT,TGACCNCGTGAT,TGACCTCGAGAT,TGACCTCGTAAT,TGACCTCGTGCT,TGACCTCGTGGT,TGACCTCGTGTT,TGACCTCNTGAT,TGACCTNGTGAT,TGACCTTGTGAT,TGACTTCGTGAT,TGAGCTCGTGAT,TGATCTCGTGAT,TGGCCTCGTGAT,TGTCCTCGTGAT	764	1,1,1,1,2,1,1,1,1,2,1,1,1,1,1,1,8,9
Lib10^2_#2 100 ng	TGAGTGTAGTTG	TCAGTGTAGTTG,TGAGTGNAGTTG,TGGGTGTAGTTG,TGTGTGTAGTTG	136	1,1,2,4
Lib10^2_#2 100 ng	TGATGGCGACAC	TGATGGCGACGC,TGATGGCGATAC,TGATGGCGTCAC,TGATGGTGACAC,TGCTGGCGACAC,TGTTGGCGACAC	289	1,1,3,1,1,2
Lib10^2_#2 100 ng	TGCGAGGGTATC	TCCGAGGGTATC,TGCGAGGGTAGC,TGCGAGTGTATC,TGCGTGGGTATC	128	1,1,1,1
Lib10^2_#2 100 ng	TGTCGTATGGGC	TGTCGTATGAGC	67	1
Lib10^2_#2 100 ng	TGTGTTGATGGT	TGTGTTGATGGG,TGTGTTGGTGGT,TGTGTTGNTGGT	195	1,1,1
Lib10^2_#2 100 ng	TTAGTATTTGAG	TTAGTATNTGAG,TTAGTATTTGGG,TTAGTATTTGTG,TTAGTCTTTGAG,TTAGTGTTTGAG	274	1,10,14,1,1
Lib10^2_#2 100 ng	TTAGTTGTCGCC	TTAGATGTCGCC,TTAGTTGTCGCT	141	1,1
Lib10^2_#2 100 ng	TTCACTGATTAT	TTCAATGATTAT,TTCACAGATTAT,TTCACTGATAAT,TTCACTGCTTAT,TTCACTGGTTAT	329	1,1,1,2,2
Lib10^2_#2 100 ng	TTCCATGCCTGC	GTCCATGCCTGC,TCCCATGCCTGC,TTCCTTGCCTGC	169	1,1,1
Lib10^2_#2 100 ng	TTCGTAGGGGTT	TTCGTAGGGCTT,TTCGTAGNGGTT,TTCGTANGGGTT	54	1,1,1
Lib10^2_#2 100 ng	TTCGTATATCTT	TTCGCATATCTT,TTCGTATATGTT	82	1,1
Lib10^2_#2 100 ng	TTGCGAATTGTT	CTGCGAATTGTT,TTGCCAATTGTT,TTGCGAATTGAT,TTGCGACTTGTT,TTGCGTATTGTT	276	1,1,1,1,2
Lib10^2_#2 100 ng	TTGGGCAGCCTT	GTGGGCAGCCTT,TTGCGCAGCCTT,TTGGGCAGACTT,TTGGGCAGTCTT,TTGGGCATCCTT,TTGGGCCGCCTT,TTGGGCTGCCTT,TTGGGGAGCCTT	292	1,1,1,1,1,1,2,2
Lib10^2_#2 100 ng	TTGTTGGCTCGG	TTGATGGCTCGG,TTGGTGGCTCGG,TTGTTGACTCGG,TTGTTGGCACGG,TTGTTGGCGCGG,TTGTTGGCTCGC,TTGTTGGCTCTG,TTGTTGGGTCGG	421	1,2,1,1,1,1,1,1
Lib10^2_#2 100 ng	TTTATGTCCCGC	TTTATGTCCAGC,TTTATGTCCCGT	85	1,1
Lib10^2_#2 100 ng	TTTGGCGTATCG	TTTGGCGAATCG,TTTGGCGGATCG,TTTGGGGTATCG,TTTGTCGTATCG	256	2,1,1,1
Lib10^2_#2 100 ng	TTTTATCATCGG	ATTTATCATCGG,TTGTATCATCGG,TTTTATCACCGG,TTTTATCATAGG,TTTTATCTTCGG	371	1,2,1,2,1
Lib10^2_#2 100 ng	TTTTGTCGCTTA	TTCTGTCGCTTA,TTTTGACGCTTA,TTTTGGCGCTTA,TTTTGTCACTTA,TTTTGTCNCTTA	206	1,2,1,1,1
Lib10^2_#2 100 ng	TTTTTGATTCTT	TTCTTGATTCTT,TTTATGATTCTT,TTTTTGAGTCTT,TTTTTGATCCTT,TTTTTGGTTCTT,TTTTTGTTTCTT	270	1,1,1,1,1,2

## Sheet: 1C
Sample name	BC	BC(-)	BC#	BC(-)#
Lib10^3 1 ng	AAACGGAGCTCT	AAACGAAGCTCT,AAACGCAGCTCT,AAACGGACCTCT,AAACGGAGCACT,AAACGGCGCTCT,AAACGGGGCTCT,AAACGGTGCTCT,AAANGGAGCTCT,AACCGGAGCTCT,AGACGGAGCTCT	229	1,2,1,1,1,2,2,1,1,1
Lib10^3 1 ng	AAACGGCCGCAG	AAACGGCCACAG,AAACGGCCGCCG,AAACGGCCGCTG,AAACGGCCGTAG,AAACGGCNGCAG,AAACTGCCGCAG,AAAGGGCCGCAG,AACCGGCCGCAG,ACACGGCCGCAG,ATACGGCCGCAG	347	1,2,9,1,1,1,1,2,2,1
Lib10^3 1 ng	AAAGGTATCACG	AAAGGTATCTCG,ACAGGTATCACG	180	1,1
Lib10^3 1 ng	AACAGAAATTGG	AACACAAATTGG	147	1
Lib10^3 1 ng	AACATTTCCTGA	AACATTGCCTGA,AACATTTCCAGA,AACATTTCCTGC,AACATTTCCTGG,AACATTTCCTGT,AGCATTTCCTGA,CACATTTCCTGA	389	1,1,1,4,2,1,1
Lib10^3 1 ng	AACCAAATCGAT	AACCAAATCCAT,AACCAAATCGCT,AACCAGATCGAT,AATCAAATCGAT	163	2,1,2,1
Lib10^3 1 ng	AACCAGTGTTAT	AACCACTGTTAT,AACCAGAGTTAT,AACCAGCGTTAT,AACCATTGTTAT,AACCTGTGTTAT,TACCAGTGTTAT	240	1,1,1,1,1,1
Lib10^3 1 ng	AACGACCAAGCA	AAAGACCAAGCA,AACGACCAACCA,AACGACCNAGCA,AACGACNAAGCA,AACGCCCAAGCA,AACGGCCAAGCA,AACGTCCAAGCA	187	1,1,1,1,1,1,2
Lib10^3 1 ng	AACGTGAGTTTT	AACGTGAGATTT,AACGTGAGCTTT,AACGTGAGGTTT,AACGTGAGTTGT,AACGTGTGTTTT,AACNTGAGTTTT,ACCGTGAGTTTT	191	1,1,1,1,2,2,1
Lib10^3 1 ng	AACTCTGCATTG	AACTATGCATTG,AACTCTACATTG,ATCTCTGCATTG	253	1,1,1
Lib10^3 1 ng	AAGAATTAGGAT	AAGAATTAGGAA,AAGAATTAGGTT,AAGAATTNGGAT,AAGAATTTGGAT,TAGAATTAGGAT	259	1,1,1,1,1
Lib10^3 1 ng	AAGATTCCGTTA	AAGATTCCCTTA,AAGATTCCGTTC,AAGTTTCCGTTA,AGGATTCCGTTA,ATGATTCCGTTA	301	2,1,1,1,2
Lib10^3 1 ng	AAGCACTAGAGT	AAGCACTAGAAT,AAGCACTAGGGT,AAGCTCTAGAGT,AAGGACTAGAGT	196	1,1,1,1
Lib10^3 1 ng	AAGGACTCGCTT	AAGGACTCACTT,AAGGGCTCGCTT,AAGTACTCGCTT	144	1,1,2
Lib10^3 1 ng	AAGGCCATATGT	AAGGCCATANGT,AAGGCCATATGA,AAGGCCATATGG,ATGGCCATATGT	260	1,1,1,1
Lib10^3 1 ng	AAGGCGCTTTAA	AACGCGCTTTAA,AAGGCGCATTAA,AAGGCGCCTTAA,AAGGCGCGTTAA,AAGGCGCNTTAA,AAGGCGTTTTAA,AAGGCNCTTTAA	263	1,7,2,2,1,1,1
Lib10^3 1 ng	AAGGGTTTATGG	AAGGCTTTATGG,AAGGGATTATGG,AAGGGNTTATGG,AAGGGTTTATGA,AAGNGTTTATGG	339	1,1,1,1,1
Lib10^3 1 ng	AAGGTCCGGGCC	AAGGCCCGGGCC,AAGGTTCGGGCC	236	1,1
Lib10^3 1 ng	AAGTGCTTTCGG	AAGAGCTTTCGG	89	1
Lib10^3 1 ng	AAGTGCTTTTCC	AAGGGCTTTTCC,AAGTTCTTTTCC,ACGTGCTTTTCC,AGGTGCTTTTCC,ATGTGCTTTTCC	315	2,1,1,1,2
Lib10^3 1 ng	AAGTTAGTAGGA	AAGATAGTAGGA,AAGTTAGAAGGA,AAGTTAGNAGGA,AAGTTAGTTGGA	269	1,1,2,1
Lib10^3 1 ng	AAGTTCCGATAT	AAGTTCCGGTAT,AAGTTCCGTTAT,AGGTTCCGATAT	151	2,1,1
Lib10^3 1 ng	AATAATTGCCAA	ATTAATTGCCAA	44	1
Lib10^3 1 ng	AATAGGCTAATA	AATAGCCTAATA,AATAGGCTAGTA,AATAGGCTATTA,AATTGGCTAATA	178	1,1,1,1
Lib10^3 1 ng	AATCCGGGTGGA	AATCCCGGTGGA,AATCCGGGAGGA,AATCCGGGTGGG,AATCCGGGTGTA,AATCCGNGTGGA,AATCTGGGTGGA,ACTCCGGGTGGA	304	1,3,2,2,1,1,1
Lib10^3 1 ng	AATCGAGTCGTG	AATAGAGTCGTG,AATCGACTCGTG,AATCGAGGCGTG,AATCGGGTCGTG	173	1,1,1,1
Lib10^3 1 ng	AATCGGTATATA	AATAGGTATATA,AATCGGAATATA,AATCGGGATATA,AATCGGNATATA,GATCGGTATATA	283	1,1,1,1,1
Lib10^3 1 ng	AATCTGGAGTTT	AACCTGGAGTTT,AATCTGAAGTTT,AATCTGCAGTTT,AATCTGGAGATT,AATCTGGAGTAT,AATCTGGAGTCT,AATCTGGAGTTG,AATCTGGTGTTT,ATTCTGGAGTTT,CATCTGGAGTTT	247	1,2,1,2,1,1,1,1,1,1
Lib10^3 1 ng	AATGCGGTCGGG	AAAGCGGTCGGG,AATGCGCTCGGG,AATGCGGTCCGG,AGTGCGGTCGGG	274	1,1,1,1
Lib10^3 1 ng	AATGCTCCAGCT	AATGCACCAGCT,AATGCGCCAGCT,AATGCTCCACCT,AATGCTCCAGAT,AATGCTCCAGCA,AATGCTCCCGCT,AATGCTCCTGCT,AATGCTTCAGCT,AATGTTCCAGCT,AGTGCTCCAGCT,GATGCTCCAGCT	233	1,1,1,1,1,1,2,1,1,2,1
Lib10^3 1 ng	AATGGGAATTGG	AATGGGAATAGG,AATGGGAATCGG,AATGGGAATTCG,AATGGGAATTGT,AATGGGGATTGG	216	1,1,1,1,2
Lib10^3 1 ng	AATGTGACGGTC	AAAGTGACGGTC,AATGTGACGGGC,AATGTGTCGGTC,AGTGTGACGGTC	162	1,2,2,1
Lib10^3 1 ng	AATTACAACCAT	AATTCCAACCAT	78	1
Lib10^3 1 ng	AATTATATGTAT	AATCATATGTAT,AATTATATATAT,AATTATATGCAT,AATTATATGTTT,ATTTATATGTAT,TATTATATGTAT	201	1,1,1,1,1,1
Lib10^3 1 ng	AATTCTTTGTCC	AATTCTTTGGCC,AATTCTTTGTAC,AATTCTTTGTCA,AATTCTTTGTGC,AGTTCTTTGTCC	287	2,1,1,1,1
Lib10^3 1 ng	AATTGCTAACTC	AATTGCTAATTC,AATTGCTACCTC,AATTGCTATCTC,AATTGCTCACTC	386	1,1,1,1
Lib10^3 1 ng	AATTTCGTTTTT	AATTTCATTTTT,AATTTCGTATTT,AATTTCGTGTTT,AATTTCGTTATT,AATTTCGTTTAT	234	1,1,1,1,1
Lib10^3 1 ng	AATTTTTAACAC	AATTCTTAACAC	72	1
Lib10^3 1 ng	ACAACGTAGGGC	ACAACGTACGGC,ACAACGTAGGAC,ACAACGTTGGGC,AGAACGTAGGGC	288	1,1,1,1
Lib10^3 1 ng	ACAAGCGTTCCA	ACAAGCGTACCA,ACAAGCGTCCCA,ACAAGNGTTCCA,ACACGCGTTCCA	276	3,3,1,1
Lib10^3 1 ng	ACAATATGACTT	ACAATATGGCTT,ACAATATGTCTT,ACACTATGACTT	340	1,1,1
Lib10^3 1 ng	ACACTTATGCAC	ACACTGATGCAC,ACACTTTTGCAC	100	1,1
Lib10^3 1 ng	ACAGGACATCAA	ACAGGCCATCAA	33	1
Lib10^3 1 ng	ACAGTTATATTA		163
Lib10^3 1 ng	ACATATCCGGAC	ACANATCCGGAC,ACATAACCGGAC,ACATATCCGGGC,ACATATCCGGTC,ACCTATCCGGAC	263	1,1,1,4,1
Lib10^3 1 ng	ACATGGGACTCC	ACATGCGACTCC,ACATGGGCCTCC,ACATGGGTCTCC,ATATGGGACTCC	205	1,1,1,1
Lib10^3 1 ng	ACCACTTGGCTT	ACCCCTTGGCTT,GCCACTTGGCTT,TCCACTTGGCTT	250	1,1,1
Lib10^3 1 ng	ACCAGGAGGCTT	ACCAGCAGGCTT,ACCAGGAGCCTT,ACCAGGAGGCTG,ACCAGGGGGCTT,ACCAGGTGGCTT,ACTAGGAGGCTT,ATCAGGAGGCTT	220	1,1,1,2,2,1,1
Lib10^3 1 ng	ACCCCTTTTTCG	ACCCCTTGTTCG,ACCCCTTTCTCG,ACCCCTTTTACG,ACCCCTTTTGCG,GCCCCTTTTTCG	225	1,1,1,1,1
Lib10^3 1 ng	ACCCTACTTTAT	ACCCTACCTTAT,ACCCTACTTCAT,ATCCTACTTTAT	229	1,1,1
Lib10^3 1 ng	ACCGTCTACGCG	ACCGGCTACGCG,ACCGTCTAGGCG	164	1,1
Lib10^3 1 ng	ACCTAGCGTGTT	ACCGAGCGTGTT,ACCTAGCATGTT,ACCTAGNGTGTT,ACCTAGTGTGTT	311	1,1,1,2
Lib10^3 1 ng	ACCTTCATCGAA	ACCTTCATCCAA,ACCTTCATCGTA,ACTTTCATCGAA	342	2,2,1
Lib10^3 1 ng	ACCTTGGATGTA	ACCATGGATGTA,ACCTTGGATGGA,ACCTTGGATGTC,ACCTTGGGTGTA	246	1,2,1,3
Lib10^3 1 ng	ACCTTTTCCGCG	TCCTTTTCCGCG	222	2
Lib10^3 1 ng	ACGACTCGTGGA	ACGACACGTGGA,ACGACNCGTGGA,ACGACTCGAGGA,ACGACTCGGGGA,ACGACTCGTGGC,ACGACTCGTGGG,ACGACTCGTGTA,ACGACTTGTGGA,ACGGCTCGTGGA,ACTACTCGTGGA	236	1,2,2,2,2,3,2,1,1,1
Lib10^3 1 ng	ACGATAAGAGTG	ACGATAAGACTG,ACGATAAGAGGG,ACGATAAGGGTG,ACGATAAGTGTG	302	1,1,3,2
Lib10^3 1 ng	ACGATATTTGAA	ACGATATGTGAA,ACGATATTTGGA,ACGATATTTGTA,ACGATTTTTGAA,ACGTTATTTGAA	281	1,2,2,1,1
Lib10^3 1 ng	ACGATGCTGTAA	ACGAGGCTGTAA,ACGATGCTGAAA,ACGATGCTGCAA,ACGATGCTGGAA,ACGATGNTGTAA,ACGATNCTGTAA,ACGCTGCTGTAA,ACGNTGCTGTAA,ACGTTGCTGTAA	306	1,4,1,2,1,1,1,1,1
Lib10^3 1 ng	ACGATTGCTTAA	AAGATTGCTTAA,ACGATTGCTTAT,ACGATTGCTTGA,ACGATTGTTTAA	364	1,2,1,1
Lib10^3 1 ng	ACGCACATGTTA	ACCCACATGTTA	209	1
Lib10^3 1 ng	ACGCAGATGAGA	ACGCAAATGAGA,ACGCAGATGAGG,ACGCAGATGGGA,ACGCAGATGTGA,ACGCAGGTGAGA,ACGCANATGAGA,ACGTAGATGAGA,CCGCAGATGAGA,TCGCAGATGAGA	259	1,1,4,4,2,1,1,1,1
Lib10^3 1 ng	ACGCTCAACTAG	ACGCTCAACTCG,ACGCTCTACTAG,AGGCTCAACTAG	362	1,1,1
Lib10^3 1 ng	ACGGCGGATGAA	ACGGCGGATGAG,ACGGCGGATGGA,ACGGCGGATGTA,ACGGCGGGTGAA,AGGGCGGATGAA	286	1,1,1,2,1
Lib10^3 1 ng	ACGGGATGGTCT	ACCGGATGGTCT,ACGGCATGGTCT,ACGGGATCGTCT,ACGGGATGGCCT,ACGGGATGGTCA,ACGGGATGGTTT,ACGGGGTGGTCT	238	1,1,1,1,1,1,1
Lib10^3 1 ng	ACGGTGTCAGGG	ACCGTGTCAGGG,ACGGAGTCAGGG,ACGGGGTCAGGG	274	2,1,2
Lib10^3 1 ng	ACGTCCGCTACC	ACGTCNGCTACC,ATGTCCGCTACC	255	1,2
Lib10^3 1 ng	ACGTGTTAATCG	ACGAGTTAATCG,ACGGGTTAATCG,ACGTGTAAATCG,ACGTGTTAACCG,ACGTGTTATTCG,AGGTGTTAATCG	242	1,2,1,1,1,1
Lib10^3 1 ng	ACTAACTAGTTC	ACTAACTAATTC,ACTAACTAGATC,ACTAACTNGTTC,ACTAGCTAGTTC	160	1,1,1,1
Lib10^3 1 ng	ACTATCCATGAC	ACTAACCATGAC,ACTATCCATGGC,ACTATCCATGTC,ATTATCCATGAC	228	1,1,3,1
Lib10^3 1 ng	ACTATGGACGTA	ACTATGGACATA,ACTATGGACGAA,ACTATGGACGGA,ACTATGGGCGTA,ACTATGGTCGTA,ACTATNGACGTA	344	1,1,3,1,3,1
Lib10^3 1 ng	ACTCAGTTGATG	ACTCAGTTGGTG,ACTCAGTTGTTG,ACTGAGTTGATG	158	3,2,1
Lib10^3 1 ng	ACTCCATCGGGG	ACTCCATCGGGA,ACTCCATCGGGC	98	1,1
Lib10^3 1 ng	ACTCGGGTAGTT	ACTCCGGTAGTT,ACTCGGGGAGTT,ACTCGGNTAGTT,ACTGGGGTAGTT	195	1,1,1,1
Lib10^3 1 ng	ACTCTGGTTCTT	ACTCTGGTTCTA,ACTGTGGTTCTT,ACTNTGGTTCTT	253	1,1,2
Lib10^3 1 ng	ACTGTACCCCAG	ACGGTACCCCAG,ACTGAACCCCAG,ACTGGACCCCAG,ACTGTACCCCCG,ACTGTACCCCGG,ACTGTACCCCTG,ATTGTACCCCAG,GCTGTACCCCAG,TCTGTACCCCAG	244	1,1,1,1,1,2,1,1,1
Lib10^3 1 ng	ACTGTTTGAGCG	ACTGTTTGTGCG	116	5
Lib10^3 1 ng	ACTTACCGAGAG	ACTTACCGAGCG,ACTTACCGAGGG,ACTTACCGAGTG,ACTTACCGGGAG,ACTTACCGTGAG	237	2,10,10,1,5
Lib10^3 1 ng	ACTTACCGTGGA	ACTTACCGAGGA,ACTTACCGGGGA,ACTTACCGTGAA,ACTTACCGTGGC,ACTTACCGTGGG,ACTTACCGTGGT,ACTTGCCGTGGA,GCTTACCGTGGA,TCTTACCGTGGA	358	2,1,1,1,3,2,1,1,1
Lib10^3 1 ng	ACTTGACGTCTC	ACTTGACATCTC,ACTTGCCGTCTC,ACTTGGCGTCTC,ACTTGTCGTCTC,ATTTGACGTCTC	343	1,2,1,7,1
Lib10^3 1 ng	ACTTGCTTATTT	ACTGGCTTATTT,ACTTGCTTAATT,ACTTGCTTAGTT,ACTTGCTTGTTT,ACTTGCTTTTTT,ACTTGGTTATTT,ATTTGCTTATTT,CCTTGCTTATTT,TCTTGCTTATTT	288	1,1,1,1,1,1,1,1,1
Lib10^3 1 ng	AGAATGCGAACG	AGAATGCAAACG,AGAATGCGGACG,AGAATGCGTACG	144	1,2,1
Lib10^3 1 ng	AGAATTTTATGT	AAAATTTTATGT,ACAATTTTATGT,AGAAGTTTATGT,AGAATATTATGT,AGAATTTTATAT,AGAATTTTATGA,AGAATTTTATGC,GGAATTTTATGT	259	1,1,1,1,1,1,1,1
Lib10^3 1 ng	AGACCTCTGCTG	AGACCTTTGCTG,AGANCTCTGCTG,AGCCCTCTGCTG,AGGCCTCTGCTG,AGTCCTCTGCTG,TGACCTCTGCTG	283	1,1,1,1,2,1
Lib10^3 1 ng	AGACTATTTGTA	AGACTATCTGTA,AGACTATGTGTA,AGACTATNTGTA,AGACTATTTGGA	269	1,1,1,1
Lib10^3 1 ng	AGACTTAATTTT	AGACGTAATTTT,AGACTTAATATT,AGACTTAATTTG	86	1,1,1
Lib10^3 1 ng	AGAGAAGTCGCC	AGAGAAGGCGCC,AGAGAAGTCCCC,AGAGAAGTCGCG,AGAGGAGTCGCC,AGGGAAGTCGCC	262	2,2,1,2,2
Lib10^3 1 ng	AGAGGAGATTAC	AGAGGAGACTAC,AGAGGCGATTAC,AGAGGGGATTAC,AGAGGTGATTAC,AGANGAGATTAC,AGTGGAGATTAC	176	1,1,1,1,1,1
Lib10^3 1 ng	AGATCTACGATT	AGATCTACGGTT,AGATCTTCGATT	295	1,1
Lib10^3 1 ng	AGATCTTGAAGC	AGATCTTGATGC,AGATCTTGGAGC,AGATCTTGTAGC,AGCTCTTGAAGC,AGGTCTTGAAGC	221	2,1,1,1,3
Lib10^3 1 ng	AGATTAAGTCGT	AGATCAAGTCGT,AGATTAAGACGT,AGATTAAGTCGA,AGATTAAGTCGC,AGATTAAGTCGG,AGATTAANTCGT,AGATTATGTCGT,AGATTTAGTCGT,AGGTTAAGTCGT,AGTTTAAGTCGT	511	1,2,2,2,1,1,1,1,1,1
Lib10^3 1 ng	AGCACCCGTCCC	AGCACCCATCCC,AGCACCCGACCC,AGCACCCGGCCC,AGCGCCCGTCCC,TGCACCCGTCCC	194	1,1,1,1,1
Lib10^3 1 ng	AGCCCATTTTAC	AGCCCATTTTAG,AGCCGATTTTAC,AGCGCATTTTAC,AGCTCATTTTAC	247	1,1,1,1
Lib10^3 1 ng	AGCCGCTCAGCC	AGCCCCTCAGCC,AGCCGCACAGCC,AGCCGCGCAGCC,AGCCGCNCAGCC,AGCCGCTCAGGC,AGCCGCTCAGTC,AGCCGCTCCGCC,AGCCGCTCTGCC,ATCCGCTCAGCC	205	1,1,2,2,1,1,2,2,1
Lib10^3 1 ng	AGCCTCTTCGGC	AGCCTCTTCGAC,CGCCTCTTCGGC	229	1,1
Lib10^3 1 ng	AGCCTTGTAGAT	ACCCTTGTAGAT,AGCCTTGGAGAT,AGCCTTGTAGGT,AGTCTTGTAGAT	222	1,1,1,1
Lib10^3 1 ng	AGCGAATCGCAG	ACCGAATCGCAG,AGCGAATCCCAG,AGCGAATCGCAA,AGCGAATCGCTG	255	1,1,1,5
Lib10^3 1 ng	AGCGCTACTGTC		159
Lib10^3 1 ng	AGCGGATTGAAG	AGCGCATTGAAG,AGCGGATTGAAT,AGCGGATTGAGG,AGCGGATTGATG,AGCGGATTGGAG,AGCGGCTTGAAG,AGCGGNTTGAAG,TGCGGATTGAAG	259	1,1,2,4,5,1,1,1
Lib10^3 1 ng	AGCGTAAGTGTT	AGCGTAAGGGTT	49	2
Lib10^3 1 ng	AGCGTGCGTGGT	AGCGTGCCTGGT,AGCGTGCGAGGT,AGCGTGCGTGAT,AGCGTGCGTGGA,GGCGTGCGTGGT,TGCGTGCGTGGT	321	1,3,1,1,1,1
Lib10^3 1 ng	AGCTACGCACTC	AGCTACCCACTC,AGCTACGCAGTC,AGCTACGCTCTC,AGCTATGCACTC,AGCTTCGCACTC	212	1,1,1,1,1
Lib10^3 1 ng	AGCTTCTTTGCT	AGCGTCTTTGCT,AGCTTNTTTGCT,ATCTTCTTTGCT	221	1,1,1
Lib10^3 1 ng	AGCTTGCCTTTC	AGCTTGCCTTTT	57	1
Lib10^3 1 ng	AGCTTTGGGTGC	AGCTTGGGGTGC,AGCTTTGGGAGC,AGCTTTGNGTGC	275	1,1,1
Lib10^3 1 ng	AGGACCTCCGAT	AGGTCCTCCGAT	67	2
Lib10^3 1 ng	AGGACTCTCGGG	AGGTCTCTCGGG	131	1
Lib10^3 1 ng	AGGAGTCCACTG	AGGGGTCCACTG	42	1
Lib10^3 1 ng	AGGATTGAGGTC	ACGATTGAGGTC,AGGATTGACGTC,AGGATTGAGATC,AGGATTGAGGGC,AGGATTGGGGTC,AGGATTGTGGTC,AGGTTTGAGGTC	385	1,1,3,1,2,5,1
Lib10^3 1 ng	AGGCATCTTTTT		138
Lib10^3 1 ng	AGGCATGGTGTG	AGGCATGGTATG	191	1
Lib10^3 1 ng	AGGCCTTCGGGA	ACGCCTTCGGGA,AGGCCTTCGGGG,AGGCCTTCGTGA	155	1,1,1
Lib10^3 1 ng	AGGCTGGTTTCC	AGACTGGTTTCC,AGGCTGGCTTCC,AGGCTGGTTTTC,AGGCTGNTTTCC,AGGCTGTTTTCC,ATGCTGGTTTCC	269	1,1,1,1,1,1
Lib10^3 1 ng	AGGCTTTCGCTT	AGGCTGTCGCTT,AGGCTTACGCTT,AGGCTTGCGCTT,AGGCTTTCCCTT,AGGCTTTGGCTT	286	1,1,1,1,1
Lib10^3 1 ng	AGGGCGGACACA	AGGCCGGACACA,AGGGCCGACACA,AGGGCGCACACA,AGGGCGGACAGA,AGGGCGGAGACA,AGGGCGGCCACA,AGGGCGGGCACA,AGGGCGGTCACA,AGGGGGGACACA,AGGGTGGACACA	309	1,1,1,1,1,1,1,3,1,1
Lib10^3 1 ng	AGGGGATGTATC	ACGGGATGTATC,AGGAGATGTATC,AGGGGAAGTATC,AGGGGATGTTTC,AGGGGNTGTATC	358	1,1,1,1,1
Lib10^3 1 ng	AGGGGGTCTTCT	AAGGGGTCTTCT,ACGGGGTCTTCT,AGGAGGTCTTCT,AGGCGGTCTTCT,AGGGAGTCTTCT,AGGGGATCTTCT,AGGGGGNCTTCT,AGGGGGTCTACT,AGGGGGTCTCCT,AGGGGGTCTTCG,AGGGGGTNTTCT,AGTGGGTCTTCT,ATGGGGTCTTCT	520	1,2,1,1,1,1,1,1,1,1,1,1,1
Lib10^3 1 ng	AGGGGTGCATAT		120
Lib10^3 1 ng	AGGGGTGCCATT	AGGGGCGCCATT,AGGGGGGCCATT,AGGGGTGCCAAT,AGGGGTGCCATA	252	1,1,1,1
Lib10^3 1 ng	AGGGTTAGTGTT	AGAGTTAGTGTT,AGGGATAGTGTT,AGGGTTAGAGTT,AGGGTTAGGGTT,AGGGTTANTGTT,AGGTTTAGTGTT,TGGGTTAGTGTT	335	1,1,1,1,1,1,1
Lib10^3 1 ng	AGGGTTGCGGGA	AAGGTTGCGGGA,AGGATTGCGGGA,AGGGATGCGGGA,AGGGTNGCGGGA,AGGGTTCCGGGA,AGGGTTGCCGGA,AGGGTTGCGGAA,AGGGTTGCGGCA,AGGGTTGCGGGG,AGGGTTGCGGGT,AGGGTTGCGTGA,AGGGTTGTGGGA	354	1,1,1,1,1,1,2,1,3,4,2,1
Lib10^3 1 ng	AGGTATAATGAG	AGGGATAATGAG,AGGTATAATGGG,AGGTATAATGTG,TGGTATAATGAG	202	1,6,7,1
Lib10^3 1 ng	AGGTCATGTTTG	AGATCATGTTTG,AGGACATGTTTG,AGGCCATGTTTG,AGGTCANGTTTG,AGGTCATGTTTA,AGGTCATGTTTT	378	1,3,1,1,1,1
Lib10^3 1 ng	AGGTCTATATAC	AGCTCTATATAC,AGGGCTATATAC,AGGTCTTTATAC,AGGTTTATATAC	303	1,1,1,1
Lib10^3 1 ng	AGGTGGCTTATT	AGATGGCTTATT,AGCTGGCTTATT,AGGTCGCTTATT,AGGTGGCTTACT,AGGTGGTTTATT,AGGTGTCTTATT	166	1,1,1,1,2,1
Lib10^3 1 ng	AGGTGTCCATAG	ACGTGTCCATAG,AGGCGTCCATAG,AGGTGTCCATTG,AGGTGTCTATAG	141	1,1,1,1
Lib10^3 1 ng	AGGTTTTTAGTT	AGGGTTTTAGTT,AGGTTTGTAGTT,AGGTTTTAAGTT,TGGTTTTTAGTT	107	1,1,1,1
Lib10^3 1 ng	AGTAAGTTAGGT	AGAAAGTTAGGT,AGGAAGTTAGGT,AGTAAGATAGGT,AGTAAGCTAGGT,AGTAAGGTAGGT,AGTAAGTTAGGC	272	1,1,1,1,3,1
Lib10^3 1 ng	AGTAATAAAGTG	AGGAATAAAGTG,AGTAAAAAAGTG,AGTAANAAAGTG,AGTAATAAAATG,AGTAATAATGTG	353	1,1,1,1,1
Lib10^3 1 ng	AGTAGACTACAT	AGTAGANTACAT,AGTAGCCTACAT,AGTAGTCTACAT,TGTAGACTACAT	222	1,1,1,1
Lib10^3 1 ng	AGTAGTTTCTTG	AATAGTTTCTTG,AGTAGCTTCTTG,AGTAGTTNCTTG	150	1,1,1
Lib10^3 1 ng	AGTATATTGCGC	AGGATATTGCGC,AGTATANTGCGC,AGTATATCGCGC,AGTATATNGCGC,AGTATGTTGCGC,AGTATNTTGCGC,AGTATTTTGCGC	338	1,1,1,1,1,1,1
Lib10^3 1 ng	AGTATTGGTGTG	AGAATTGGTGTG,AGTATAGGTGTG,AGTATTGGGGTG,AGTATTGGTGAG,AGTATTGGTGGG,TGTATTGGTGTG	233	2,1,1,1,1,1
Lib10^3 1 ng	AGTCCTTCTTTG	ACTCCTTCTTTG,AGTCCTGCTTTG,TGTCCTTCTTTG	205	1,2,1
Lib10^3 1 ng	AGTCGCCGACGC	AGGCGCCGACGC,AGTCGACGACGC,AGTCGCCGGCGC,AGTCGCCGTCGC,AGTCGGCGACGC,AGTCGTCGACGC	225	1,1,1,6,1,1
Lib10^3 1 ng	AGTCGGGAGTAT	AATCGGGAGTAT,AGTCGGCAGTAT,AGTCGGGCGTAT,AGTCGGGNGTAT,AGTCGTGAGTAT,AGTGGGGAGTAT,AGTTGGGAGTAT	183	1,1,1,1,1,1,1
Lib10^3 1 ng	AGTCTCAATTGG	ACTCTCAATTGG,AGGCTCAATTGG,AGTCTCAATAGG,AGTCTCAATGGG,AGTCTCAATTCG,AGTCTCAATTGT,CGTCTCAATTGG,GGTCTCAATTGG	303	2,1,1,1,1,1,1,1
Lib10^3 1 ng	AGTCTTACACCA	AGTCTTACACGA,AGTCTTACTCCA	156	1,1
Lib10^3 1 ng	AGTGAGGGCTTT	ACTGAGGGCTTT,AGGGAGGGCTTT,AGTGAGGGGTTT,AGTGGGGGCTTT,AGTGTGGGCTTT,TGTGAGGGCTTT	291	1,1,1,4,3,1
Lib10^3 1 ng	AGTGCTTATACC	ACTGCTTATACC,AGTGCCTATACC,AGTGCTTATGCC,AGTGCTTGTACC,ATTGCTTATACC,TGTGCTTATACC	221	1,1,1,1,1,1
Lib10^3 1 ng	AGTGGATGCTAT	AGTGAATGCTAT,AGTGGATNCTAT,AGTGGGTGCTAT,AGTGGTTGCTAT,AGTNGATGCTAT,CGTGGATGCTAT	248	1,1,1,2,1,1
Lib10^3 1 ng	AGTGGCGGGTGA	AGTAGCGGGTGA,AGTGGCGGCTGA,AGTGGCGGGTGG,AGTGGTGGGTGA	309	1,1,2,1
Lib10^3 1 ng	AGTGGGCTGGCT	AGAGGGCTGGCT,AGTCGGCTGGCT,AGTGCGCTGGCT,AGTGGGCTGGTT,AGTNGGCTGGCT	217	1,1,1,1,1
Lib10^3 1 ng	AGTGTGAGTCTC	AGTGGGAGTCTC,AGTGTAAGTCTC,AGTGTGAGACTC,AGTGTGAGCCTC,AGTGTGAGTTTC,AGTGTGGGTCTC,AGTGTGTGTCTC	159	1,1,1,1,1,2,2
Lib10^3 1 ng	AGTGTGCCTATT	AGTCTGCCTATT,AGTGTACCTATT,AGTGTGCCTCTT,AGTGTGCGTATT,AGTGTGCNTATT	251	1,1,1,1,1
Lib10^3 1 ng	AGTGTGGGGATA	AGTGTGAGGATA,AGTGTGGGGTTA,AGTGTGTGGATA	215	2,2,1
Lib10^3 1 ng	AGTGTGTTTTCA	AGTGGGTTTTCA,AGTGTGCTTTCA,AGTGTGGTTTCA,AGTGTGTTGTCA	237	1,1,1,1
Lib10^3 1 ng	AGTGTTTTTTGT	ACTGTTTTTTGT,AGTGTGTTTTGT,AGTGTTTTATGT	153	1,1,1
Lib10^3 1 ng	AGTTACTGCTTT	AGGTACTGCTTT,AGTTACTGCTTA,AGTTACTGCTTC	317	1,1,1
Lib10^3 1 ng	AGTTGAATTATG		88
Lib10^3 1 ng	AGTTGAGCTTAC	AGTTGATCTTAC,AGTTGGGCTTAC,AGTTGTGCTTAC	73	1,1,3
Lib10^3 1 ng	AGTTGTCGGTAC	AGCTGTCGGTAC,AGTTCTCGGTAC,AGTTGACGGTAC,AGTTGTCAGTAC,AGTTGTCGGAAC,AGTTGTCGGGAC,AGTTGTCGGTAG,AGTTGTCGGTAT,CGTTGTCGGTAC	309	1,1,1,1,1,1,1,1,1
Lib10^3 1 ng	AGTTTCGATGAG	ACTTTCGATGAG,AGTNTCGATGAG,AGTTTCGATGGG,AGTTTCGATGTG,AGTTTCGTTGAG,AGTTTCTATGAG	296	1,1,10,9,1,1
Lib10^3 1 ng	AGTTTCTGCCGT	AGATTCTGCCGT,AGTTTCTCCCGT,AGTTTCTGGCGT,AGTTTCTGTCGT,AGTTTGTGCCGT	216	1,1,1,1,1
Lib10^3 1 ng	AGTTTCTTATGA	AGGTTCTTATGA,AGTATCTTATGA,AGTTTCTTATGG,AGTTTCTTATGT	301	1,1,2,1
Lib10^3 1 ng	ATAACTGGACCC	ATAACTGAACCC,ATAACTGCACCC,ATAACTGGACGC,ATAACTGGCCCC,ATAACTGGGCCC,ATAACTGGTCCC	160	2,1,1,2,1,4
Lib10^3 1 ng	ATAATCCTTGCA	ATAATCCTCGCA,ATAATCCTTGGA	255	2,1
Lib10^3 1 ng	ATAATGGTCTTT	ATAAAGGTCTTT,ATAATGGTCCTT,ATAATGGTCTAT,ATAATGGTCTGT	332	2,1,1,1
Lib10^3 1 ng	ATAATGTCATTG	ATAATGACATTG,ATAATGTCATGG	326	1,1
Lib10^3 1 ng	ATACCGGCGGTT	ATACCGGCAGTT,ATACCGGCGATT,ATACCGGCGGGT,ATACCGGCGGTG,ATACCGGTGGTT,ATATCGGCGGTT,ATTCCGGCGGTT	287	1,1,30,1,1,2,1
Lib10^3 1 ng	ATACCTGTTAAT		66
Lib10^3 1 ng	ATAGGCATGTAG	ATAGGCANGTAG,ATAGGCATGAAG,ATAGGCATGTTG,ATANGCATGTAG	251	1,1,5,1
Lib10^3 1 ng	ATAGGTAATATC	ATAGGGAATATC,ATAGGTAATTTC	225	1,1
Lib10^3 1 ng	ATAGTGCTGTGC	ATACTGCTGTGC,ATAGGGCTGTGC,ATAGTGCTCTGC,ATAGTGCTGCGC,ATAGTGCTGGGC,ATAGTGGTGTGC,ATGGTGCTGTGC	353	1,2,1,1,2,1,2
Lib10^3 1 ng	ATAGTGGGTTGT	ATAGAGGGTTGT,ATAGTGAGTTGT,ATAGTGGATTGT,ATAGTGGGATGT,ATAGTGGGCTGT,ATAGTGGGGTGT,ATAGTGGGTTGG,ATAGTTGGTTGT	362	1,1,1,2,1,2,3,1
Lib10^3 1 ng	ATAGTTGCGAGC	ACAGTTGCGAGC,ATAATTGCGAGC,ATAGTTGCGAGT,ATAGTTGCGCGC,ATAGTTGCGTGC,ATTGTTGCGAGC	342	1,1,1,1,2,1
Lib10^3 1 ng	ATAGTTTCCACA		58
Lib10^3 1 ng	ATATCAAGACCG	ATANCAAGACCG,ATATCAAGACCA,ATATCAAGATCG,ATATCAAGCCCG,ATATCAAGGCCG,ATATCAAGTCCG,ATATCATGACCG	339	2,1,1,3,3,4,1
Lib10^3 1 ng	ATATCCCAATCT	ATATCCCAATCA,ATATCNCAATCT	148	1,1
Lib10^3 1 ng	ATATCTCGGAGG	ATATCTCGGGGG	224	4
Lib10^3 1 ng	ATATCTTTGGGA	ATATCTATGGGA,ATATCTTTGAGA,ATATCTTTGGGG,ATATTTTTGGGA	178	1,1,1,1
Lib10^3 1 ng	ATATGTACATCT	AGATGTACATCT,TTATGTACATCT	162	1,1
Lib10^3 1 ng	ATATTGGTATTT	ATATTCGTATTT,ATATTGCTATTT,ATATTGGTATGT,CTATTGGTATTT	181	1,1,1,1
Lib10^3 1 ng	ATCAGATTCAAG	ACCAGATTCAAG,ATCAGATTCATG	35	1,1
Lib10^3 1 ng	ATCATTGTCTGA	ATCATTGACTGA	97	1
Lib10^3 1 ng	ATCCCTTATTTG	ATCCCTAATTTG,ATCCCTTATATG,ATCCCTTATTTA,ATCCCTTNTTTG,ATCTCTTATTTG,CTCCCTTATTTG	271	1,2,1,1,1,1
Lib10^3 1 ng	ATCCGGACGGAA	ATCCGAACGGAA,ATCCGGACGCAA,ATCCGGACGGTA,ATCCGGACTGAA,ATCCGGANGGAA,ATCCGGATGGAA,ATCCGGNCGGAA,ATCCGGTCGGAA	189	1,1,1,1,1,1,1,2
Lib10^3 1 ng	ATCCGTTCTGGC	AGCCGTTCTGGC,ATACGTTCTGGC,ATCCGATCTGGC,ATCCGCTCTGGC,ATCCGGTCTGGC,ATCCGTACTGGC,ATCCGTTCGGGC,ATCCGTTCTGAC,ATCCGTTCTGTC	216	1,1,2,1,2,1,1,1,1
Lib10^3 1 ng	ATCGAAACCGTT	ATCGAAACCCTT,ATCGTAACCGTT,GTCGAAACCGTT	155	1,1,1
Lib10^3 1 ng	ATCGAATTACAT	ATCGAGTTACAT,ATCGTATTACAT,ATCNAATTACAT,TTCGAATTACAT	130	1,2,1,1
Lib10^3 1 ng	ATCGCGAGAATA	ATCGCAAGAATA,ATCGCGAGCATA	93	1,1
Lib10^3 1 ng	ATCTCACACTGG	ATCTCACCCTGG,ATCTCACTCTGG,GTCTCACACTGG,TTCTCACACTGG	260	1,1,1,1
Lib10^3 1 ng	ATCTGCCTTTTA	ATCTCCCTTTTA	240	1
Lib10^3 1 ng	ATCTGGTCGATT	ATCTGCTCGATT,ATCTGGTCGATA,ATCTGGTCGATG,ATCTGGTNGATT,ATTTGGTCGATT	208	1,1,1,1,1
Lib10^3 1 ng	ATCTGTTAAGTC	ATCAGTTAAGTC,ATCTGNTAAGTC,ATCTGTTAACTC,ATCTGTTAAGAC	291	1,1,1,1
Lib10^3 1 ng	ATCTTCCTCCTA	TTCTTCCTCCTA	202	1
Lib10^3 1 ng	ATCTTGTGTTGC	ATCTTGAGTTGC,ATCTTGTGATGC,ATCTTGTGTAGC,ATCTTGTGTGGC,ATCTTGTGTTAC,ATCTTGTGTTGT	292	1,1,1,1,1,1
Lib10^3 1 ng	ATCTTTTGGTCG	ATCTTNTGGTCG,ATCTTTTGGCCG	181	1,1
Lib10^3 1 ng	ATGAATTGGCAT	ACGAATTGGCAT,ATGAAATGGCAT,ATGAATAGGCAT,ATGAATCGGCAT,ATGAATTGGCAG	281	2,1,1,1,1
Lib10^3 1 ng	ATGAGGATGTGC	ATGAGGCTGTGC,ATGAGGGTGTGC,ATGAGGTTGTGC,ATGGGGATGTGC,ATGTGGATGTGC	326	1,1,1,2,2
Lib10^3 1 ng	ATGAGGTCGGCA	ATGCGGTCGGCA,ATGGGGTCGGCA	86	1,1
Lib10^3 1 ng	ATGAGTGCGGCA	ATGAGAGCGGCA,ATGAGTGCGCCA,ATGGGTGCGGCA,ATGTGTGCGGCA,CTGAGTGCGGCA	290	1,1,2,2,1
Lib10^3 1 ng	ATGATGTGGTTT	ATGATGTGGATT,ATGATGTGGTGT,TTGATGTGGTTT	167	1,1,1
Lib10^3 1 ng	ATGATTCGAAGG	ATGATACGAAGG,ATGATTCCAAGG,ATGATTCGAAGC,ATGATTCGAGGG,ATGATTCGCAGG,ATGATTCGGAGG,ATGATTCGTAGG,ATGATTCNAAGG,ATGATTGGAAGG,ATGATTNGAAGG,ATGCTTCGAAGG,ATGGTTCGAAGG,ATGTTTCGAAGG	367	1,2,1,2,1,3,5,1,1,1,1,1,1
Lib10^3 1 ng	ATGCATTGTTTC	ATGAATTGTTTC,ATGCATTCTTTC,ATGCATTGTATC,ATGCTTTGTTTC,ATGGATTGTTTC,CTGCATTGTTTC	274	1,1,1,1,2,1
Lib10^3 1 ng	ATGCGCCACATG	ATGCGCCACGTG,ATGCGCCACTTG,ATGCGNCACATG,ATGGGCCACATG	302	1,1,1,1
Lib10^3 1 ng	ATGGAATTTCGT	ATGGAANTTCGT,ATGGAATTTCGC,ATGGGATTTCGT,ATGGTATTTCGT	139	1,1,1,1
Lib10^3 1 ng	ATGGACCGGCGT	ATGGACCCGCGT,ATGGACCGGCGA,ATGGACCGGCGG,ATGGAGCGGCGT,ATGGCCCGGCGT,ATGGGCCGGCGT,ATGGTCCGGCGT,ATGTACCGGCGT	270	1,1,1,1,2,5,7,1
Lib10^3 1 ng	ATGGACTTGGGT	ATGGACNTGGGT,ATGGACTTGAGT,ATGGACTTGTGT,ATGGATTTGGGT,ATGGCCTTGGGT,ATGGGCTTGGGT,ATGGTCTTGGGT,TTGGACTTGGGT	378	1,1,1,1,1,1,3,1
Lib10^3 1 ng	ATGGATCGACGT	ATGGATCGACGG,ATGGATCGTCGT,ATGGGTCGACGT,ATGGTTCGACGT,ATGNATCGACGT,ATGTATCGACGT	308	1,4,2,1,1,1
Lib10^3 1 ng	ATGGCTTCGTCC		54
Lib10^3 1 ng	ATGGGATCTGGT	ATGGGATCTGTT,ATGGGGTCTGGT,ATGGTATCTGGT	256	1,2,1
Lib10^3 1 ng	ATGGGTTTCTCG	ATGGGGTTCTCG,CTGGGTTTCTCG	264	1,1
Lib10^3 1 ng	ATGGTCAACACC	ATGGTCAACACT,ATGGTCAACTCC,ATGGTCTACACC,ATGGTNAACACC	151	1,1,1,1
Lib10^3 1 ng	ATGGTCTTGTTC	AGGGTCTTGTTC,ATGATCTTGTTC,ATGGTCTTGATC,ATGGTCTTGGTC,ATGNTCTTGTTC	182	1,1,1,1,1
Lib10^3 1 ng	ATGGTTGAACTT	ACGGTTGAACTT,ATGGTAGAACTT,ATGGTGGAACTT,ATGGTTCAACTT,ATGGTTGAACTC,ATGGTTGAAGTT,ATGGTTGGACTT,ATGGTTGTACTT	237	1,1,1,1,1,1,2,1
Lib10^3 1 ng	ATGTAGGACTGA	AAGTAGGACTGA,ATGTAAGACTGA,ATGTAGAACTGA,ATGTAGGACAGA,ATGTAGGACTCA,ATGTAGGACTGG,ATGTAGGACTGT,ATGTAGGACTTA,ATGTAGGCCTGA,ATGTAGGTCTGA	395	1,1,1,1,1,1,3,1,1,5
Lib10^3 1 ng	ATGTCAGCAGTG	ACGTCAGCAGTG,ATGTCAGCAGGG,ATGTCAGCAGTA,ATGTCAGGAGTG,ATGTCCGCAGTG,ATGTCGGCAGTG,ATGTGAGCAGTG	316	1,2,1,2,1,1,1
Lib10^3 1 ng	ATGTCGCCTAGA	ATGTCACCTAGA,ATGTCCCCTAGA,ATGTCGCCTAGC,ATGTCGCCTAGG,ATGTCGCCTAGT,ATGTCGCCTATA,ATGTCGCNTAGA,ATGTCGGCTAGA,ATGTCGTCTAGA	359	1,1,1,3,1,1,1,1,1
Lib10^3 1 ng	ATGTCTGGAATT	ATGGCTGGAATT,ATGTCTGAAATT,ATGTCTGGAATC	83	1,1,1
Lib10^3 1 ng	ATGTGCCAGCTT	ATCTGCCAGCTT,ATGAGCCAGCTT,ATGGGCCAGCTT,ATGTGCCAGGTT,ATGTGCCAGTTT,ATGTGCNAGCTT,ATGTGNCAGCTT,TTGTGCCAGCTT	309	1,1,3,1,2,1,1,1
Lib10^3 1 ng	ATGTGTGCTAAT	ATGTGTGCGAAT,ATGTGTGCTTAT,ATGTGTGTTAAT,CTGTGTGCTAAT	259	1,1,1,2
Lib10^3 1 ng	ATGTTCCATCTT	ATGTTACATCTT	257	1
Lib10^3 1 ng	ATGTTCTATAAT	ATGATCTATAAT	170	1
Lib10^3 1 ng	ATGTTGTTTGTA	ATATTGTTTGTA,ATGTTGCTTGTA,ATGTTGTTTGGA	154	1,1,1
Lib10^3 1 ng	ATGTTTAGGCCG	ATGATTAGGCCG,ATGGTTAGGCCG,ATGTTGAGGCCG,ATGTTTAGGTCG,ATGTTTCGGCCG,ATGTTTNGGCCG,ATGTTTTGGCCG	267	3,1,1,1,1,2,2
Lib10^3 1 ng	ATTAACTTAGGG	ACTAACTTAGGG,ATTAACNTAGGG,ATTAACTTAGAG,ATTACCTTAGGG,ATTATCTTAGGG,ATTNACTTAGGG	278	1,1,1,1,1,1
Lib10^3 1 ng	ATTAATTAACTA	ATAAATTAACTA,ATTAATTAACTG,ATTAATTATCTA,ATTAGTTAACTA	163	1,1,1,1
Lib10^3 1 ng	ATTACGAGTATC	ATTACGGGTATC,ATTACGTGTATC	143	1,1
Lib10^3 1 ng	ATTAGATCCCCT	ATTAGACCCCCT,ATTAGATCCCGT,ATTAGGTCCCCT,ATTAGTTCCCCT	227	1,1,3,6
Lib10^3 1 ng	ATTAGCATATCC	ATTAGCATAACC	175	1
Lib10^3 1 ng	ATTAGGGAGTGG	AATAGGGAGTGG,ATTACGGAGTGG,ATTAGGCAGTGG,ATTAGGGGGTGG,ATTAGGGTGTGG,ATTAGNGAGTGG,GTTAGGGAGTGG	290	1,1,1,2,1,1,2
Lib10^3 1 ng	ATTATAGTGGAT	ATTATAGGGGAT,ATTATAGTGGAG,ATTATAGTGGCT,ATTATAGTGGGT,ATTATTGTGGAT	245	1,1,1,1,1
Lib10^3 1 ng	ATTCATAGGGGG	ATTCATAGAGGG,ATTCATAGGAGG,ATTCATAGGCGG,ATTCATAGTGGG	178	1,1,1,1
Lib10^3 1 ng	ATTCCCTACCAG	ATCCCCTACCAG,ATTCCCCACCAG,ATTCCCTACAAG,ATTCCCTACCTG	148	1,1,1,2
Lib10^3 1 ng	ATTCCGAGTTGA	ATTCCCAGTTGA,ATTCCGAGGTGA,ATTCCGAGTTGG,ATTCCGAGTTGT,ATTCCGTGTTGA,ATTGCGAGTTGA	209	1,1,1,1,1,1
Lib10^3 1 ng	ATTCTAGGACTG	ATTCTAGGAATG,ATTCTAGGCCTG,ATTCTAGGGCTG,ATTCTAGGTCTG,ATTCTAGNACTG,ATTCTAGTACTG,TTTCTAGGACTG	341	2,1,2,4,1,1,1
Lib10^3 1 ng	ATTCTATGGGGG	ACTCTATGGGGG,ATTCTATGCGGG,ATTCTATGGGCG,ATTCTATGGGGT	237	1,1,1,1
Lib10^3 1 ng	ATTCTCGTGCTA	ATTCTAGTGCTA,ATTCTCGGGCTA,ATTCTCGTGCCA,ATTCTCGTGGTA,ATTCTTGTGCTA,ATTTTCGTGCTA	163	1,3,1,1,1,1
Lib10^3 1 ng	ATTGATGCGCGT	ATTGATGCGCGA,ATTGATGCGTGT,ATTGGTGCGCGT,ATTGTTGCGCGT,ATTNATGCGCGT,CTTGATGCGCGT	271	1,1,3,3,1,1
Lib10^3 1 ng	ATTGCTCCATTT	ATTGCTCCANTT,ATTGCTCCATCT,ATTGCTCCATTA,GTTGCTCCATTT	239	1,1,1,1
Lib10^3 1 ng	ATTGGACGATTT	AATGGACGATTT,ATTGAACGATTT,ATTGGACCATTT,ATTGGACGATCT,ATTGGAGGATTT,ATTGGTCGATTT,ATTGTACGATTT	244	1,1,2,1,1,2,1
Lib10^3 1 ng	ATTGGGGTCTTT	ACTGGGGTCTTT,ATTAGGGTCTTT,ATTGGCGTCTTT,ATTGGGGTCTCT,ATTGGTGTCTTT,ATTGTGGTCTTT,CTTGGGGTCTTT,GTTGGGGTCTTT	275	1,1,1,1,1,1,1,1
Lib10^3 1 ng	ATTGGTAGTCGC		76
Lib10^3 1 ng	ATTGGTGCACCT	ATTGGTGTACCT	241	1
Lib10^3 1 ng	ATTGTGGGTCAC	ATTGTGGGCCAC	297	1
Lib10^3 1 ng	ATTGTTGTTTAT	AGTGTTGTTTAT,ATTGTTGNTTAT,ATTGTTGTGTAT,ATTGTTGTTTAA,ATTNTTGTTTAT	163	2,1,2,1,1
Lib10^3 1 ng	ATTTCGTCTTTT	ATTTCGTCTTCT,ATTTCGTCTTTC,ATTTCGTGTTTT	235	2,1,2
Lib10^3 1 ng	ATTTGACTGGCG	AATTGACTGGCG,ATATGACTGGCG,ATTTGACTGGGG,ATTTGTCTGGCG	186	1,1,1,2
Lib10^3 1 ng	ATTTGGCTGAAT	ATTTGGCTGGAT,ATTTGGCTGTAT	142	2,1
Lib10^3 1 ng	ATTTTCTAACTC	AGTTTCTAACTC,ATTTTCTAATTC,ATTTTCTAGCTC	140	1,1,1
Lib10^3 1 ng	ATTTTTAGCGTT	AATTTTAGCGTT,ACTTTTAGCGTT,ATTTTTAGAGTT,ATTTTTATCGTT	172	2,1,1,1
Lib10^3 1 ng	ATTTTTGCTGTC	ATTTTTGCTGGC,ATTTTTGCTGTA,ATTTTTTCTGTC	297	1,1,1
Lib10^3 1 ng	ATTTTTTAGATT	ATTATTTAGATT	121	1
Lib10^3 1 ng	CAAATCTATGTG	CAAATCTATGGG	281	1
Lib10^3 1 ng	CAACATGCCTTC	CAACATGCCTTT	89	1
Lib10^3 1 ng	CAACGGAACTGT	CAACGAAACTGT,CAACGGAACAGT,CAACGGAACTGG,CAACGGANCTGT,CAACGGGACTGT,CATCGGAACTGT,CCACGGAACTGT,CTACGGAACTGT	273	1,1,1,1,2,1,1,2
Lib10^3 1 ng	CAACTAGTTCTG	CAACTAGATCTG,CAACTAGTTCTA	245	1,1
Lib10^3 1 ng	CAAGCAACAATT	CAAGCAACAGTT,CAAGCACCAATT,CAAGGAACAATT	78	1,1,1
Lib10^3 1 ng	CAAGCGATAGGA	CAAGCCATAGGA,CAAGCGATAGGC,CAAGCGATAGGT,CAAGGGATAGGA,CACGCGATAGGA	323	1,2,1,1,1
Lib10^3 1 ng	CAAGTGGTTCGT	CAAGTAGTTCGT,CAAGTGGGTCGT,CAAGTGGTACGT,CAAGTGGTTCGG,CCAGTGGTTCGT,GAAGTGGTTCGT	203	1,1,1,3,1,1
Lib10^3 1 ng	CAATGCCGCTAC	CAAAGCCGCTAC,CAATGTCGCTAC	50	1,1
Lib10^3 1 ng	CAATTTGAAATT	CAATTTGAAATC,CAATTTGGAATT	354	1,1
Lib10^3 1 ng	CACACCGTCGTT	CACACCCTCGTT,CACACCGACGTT,CACACCGNCGTT,CACACCGTCATT,CACACCGTCGAT,CACACCGTCGGT,CACACCGTCGTA,CACACCGTCGTG,CACTCCGTCGTT	310	1,1,1,1,1,1,3,1,1
Lib10^3 1 ng	CACACTCCGAGT	CACACTCCCAGT,CACACTCCGCGT,CACACTCCGGGT,CACACTCCGTGT,CACACTCNGAGT,CACACTTCGAGT,CTCACTCCGAGT	324	2,1,5,8,1,1,1
Lib10^3 1 ng	CACATACGTGGA	CACATAAGTGGA,CACATACGAGGA,CACATACGGGGA,CACATACGTAGA,CACATACGTGGC,CACATACGTGGG,CACATACGTGGT,CACATACNTGGA,CACATANGTGGA,CACATATGTGGA,CACATCCGTGGA,CATATACGTGGA,CTCATACGTGGA	229	1,1,2,1,1,1,2,1,1,1,1,1,1
Lib10^3 1 ng	CACATGGAGAAG	CACATGAAGAAG,CACATGGACAAG,CACATGGAGAGG,CACATGGAGATG,CACATGGAGGAG,CACATGGAGTAG,CACATGGGGAAG,CACATGGNGAAG,CACATGGTGAAG,CACATNGAGAAG,CATATGGAGAAG,GACATGGAGAAG,TACATGGAGAAG	331	1,1,4,3,2,1,1,1,3,1,1,1,1
Lib10^3 1 ng	CACATGTTGTAT		141
Lib10^3 1 ng	CACGACGTGCCA	CACCACGTGCCA,CACGACGAGCCA,CACGCCGTGCCA,CACGGCGTGCCA,CACGTCGTGCCA,CATGACGTGCCA,CTCGACGTGCCA,GACGACGTGCCA	159	1,2,1,2,5,1,1,1
Lib10^3 1 ng	CACGCCTTAATA	CACGCCTTAACA,CACGCCTTAAGA,CACGCCTTATTA,CACGCNTTAATA,CACGGCTTAATA,CACGTCTTAATA,CACNCCTTAATA,CTCGCCTTAATA	357	1,1,1,2,1,1,1,2
Lib10^3 1 ng	CACGTAATTTGT	CACGAAATTTGT,CACGTAANTTGT,CACGTAATCTGT,CACGTAATTTGA,CACGTAATTTGG,CATGTAATTTGT	225	1,1,1,2,1,1
Lib10^3 1 ng	CACTATACAATT	CACTATACACTT,CACTTTACAATT	133	1,1
Lib10^3 1 ng	CACTTGCTCACT	CACTTGCACACT,CACTTGCTGACT,CACTTGTTCACT,CACTTNCTCACT	305	1,1,1,1
Lib10^3 1 ng	CAGAGAAGACTA	CAGAAAAGACTA,CAGAGNAGACTA,CAGAGTAGACTA,CAGGGAAGACTA	200	1,1,1,1
Lib10^3 1 ng	CAGATGTTTACT	CAGATATTTACT,CAGATGGTTACT,CAGATGTTTAGT,CAGATNTTTACT,CAGTTGTTTACT,CTGATGTTTACT,TAGATGTTTACT	333	1,1,1,1,3,3,1
Lib10^3 1 ng	CAGATTGGTGGC	CAGATAGGTGGC,CAGATTGGAGGC,CAGATTGGTTGC,CTGATTGGTGGC	440	3,1,1,1
Lib10^3 1 ng	CAGCACAGCTTA	CAGGACAGCTTA,CTGCACAGCTTA	261	1,1
Lib10^3 1 ng	CAGCCAATATGC		242
Lib10^3 1 ng	CAGCCGTTAAGT	CAGCCGATAAGT,CAGCCGGTAAGT,CAGCCGNTAAGT,CAGCCGTGAAGT,CAGCCGTTATGT,CATCCGTTAAGT,CTGCCGTTAAGT,GAGCCGTTAAGT	327	3,2,1,1,3,1,1,1
Lib10^3 1 ng	CAGCTCCGTTTG	CACCTCCGTTTG,CAGCTCCGTCTG,CAGCTCCNTTTG,GAGCTCCGTTTG	222	1,1,1,1
Lib10^3 1 ng	CAGCTCTTCCCT	CAGGTCTTCCCT	144	1
Lib10^3 1 ng	CAGCTTGTAAGA	CACCTTGTAAGA,CAGCTTGCAAGA,CAGCTTGGAAGA,CAGCTTGTAAGG,CAGCTTGTATGA,TAGCTTGTAAGA	269	1,1,1,1,1,1
Lib10^3 1 ng	CAGGCCGACTCG		67
Lib10^3 1 ng	CAGGCTGCTTCA	CAGCCTGCTTCA,CAGGCTGCTACA,CAGGCTGCTGCA,CAGGCTGCTTCT,CAGGCTGGTTCA,CAGGGTGCTTCA	236	1,1,1,1,1,2
Lib10^3 1 ng	CAGGGGTCTACG	CAGAGGTCTACG,CAGGCGTCTACG,CAGGGATCTACG,CAGGGGNCTACG,CAGGGGTNTACG,CAGNGGTCTACG,CGGGGGTCTACG,CTGGGGTCTACG	312	1,1,1,1,1,1,1,1
Lib10^3 1 ng	CAGGTCCAATTT	CACGTCCAATTT,CAGGCCCAATTT,CAGGTCAAATTT,CAGGTCCAAGTT,CAGGTCCAATGT	211	1,1,1,1,1
Lib10^3 1 ng	CAGGTGTATTAT	CAGGTGAATTAT,CAGGTGCATTAT,CAGGTGTNTTAT,CAGTTGTATTAT	246	1,1,1,1
Lib10^3 1 ng	CAGGTTCTTGGA	CAGGTACTTGGA,CAGGTTCATGGA,CAGGTTCNTGGA,CAGGTTCTAGGA,CAGGTTCTTAGA,CAGGTTCTTGAA,CAGGTTCTTGGC,CAGGTTCTTGGG,CAGGTTNTTGGA	207	1,1,1,1,1,1,1,1,1
Lib10^3 1 ng	CAGTCGCAAGAC	CAGGCGCAAGAC,CAGTCCCAAGAC,CAGTCGCAAGTC,CAGTCGNAAGAC,CTGTCGCAAGAC	306	4,1,2,1,1
Lib10^3 1 ng	CAGTGAGTCTAG	CAGTGAGACTAG,CAGTGAGTCTGG,CAGTGAGTCTTG,CAGTGGGTCTAG,CAGTGNGTCTAG,CAGTGTGTCTAG,CGGTGAGTCTAG	266	1,1,1,3,1,1,1
Lib10^3 1 ng	CAGTGCACGCCA	CAGAGCACGCCA,CAGTGCACGCTA,CAGTGCTCGCCA,CAGTGTACGCCA,CTGTGCACGCCA	317	1,1,2,1,1
Lib10^3 1 ng	CAGTGGATAGAT	CAGGGGATAGAT	137	1
Lib10^3 1 ng	CAGTTGCTGGAC	CAGCTGCTGGAC,CAGGTGCTGGAC,CAGTGGCTGGAC,CAGTTGCTGCAC,CAGTTGCTGGCC,CAGTTGCTGGTC,CTGTTGCTGGAC	293	1,1,1,2,1,2,2
Lib10^3 1 ng	CAGTTGTAGCTC	CAGGTGTAGCTC,CAGNTGTAGCTC,CAGTTGTAGTTC	188	1,1,1
Lib10^3 1 ng	CATAAATTGCGA	CATAAATTGAGA,CATAAATTGCGT,CATAACTTGCGA,CTTAAATTGCGA,TATAAATTGCGA	110	2,1,1,1,1
Lib10^3 1 ng	CATAGGATGTAT	CATAGAATGTAT	218	2
Lib10^3 1 ng	CATATGCCCCTG	CATATGCCCATG,CATATGCCCCTA,CATATGCNCCTG,CATATGNCCCTG,CATATTCCCCTG,CGTATGCCCCTG	289	1,1,1,1,1,1
Lib10^3 1 ng	CATATTCCAGGT	CAAATTCCAGGT,CATATCCCAGGT,CATATNCCAGGT,CATATTNCAGGT	87	1,1,1,1
Lib10^3 1 ng	CATCCCACGTCG	CATCCCATGTCG,CATCCNACGTCG,CGTCCCACGTCG,CTTCCCACGTCG	235	1,1,1,1
Lib10^3 1 ng	CATCGCGGTGAT	CATCGCGGGGAT,CATCGCGGTGAC,CATCGCGGTGGT,CATCGCGGTGTT,CATNGCGGTGAT	274	1,1,1,1,1
Lib10^3 1 ng	CATCTGCTGGCT		99
Lib10^3 1 ng	CATCTGGCGGAC	CATCTGGCAGAC,CATCTGGCGGAT,CATCTGGCGGGC	216	1,1,1
Lib10^3 1 ng	CATGATAGGTAT	CATCATAGGTAT,CATGATAGATAT,CATGATANGTAT	155	1,1,1
Lib10^3 1 ng	CATGGCTTGACT	CATGGCTNGACT,CATGGCTTGCCT,CATGGCTTGGCT,CATGGCTTGTCT,CATGGGTTGACT	417	1,1,3,4,1
Lib10^3 1 ng	CATGTTCACGGC	CATATTCACGGC,CATCTTCACGGC,CATGTCCACGGC,CATGTTCACCGC,CATGTTCATGGC,CATGTTCNCGGC,CATGTTCTCGGC,CATNTTCACGGC,CATTTTCACGGC	344	1,1,1,1,1,1,1,1,1
Lib10^3 1 ng	CATTAAGCACGG	CATTATGCACGG,CTTTAAGCACGG	293	2,1
Lib10^3 1 ng	CATTACTTCGAA	CATTACNTCGAA,CATTACTTCCAA,CATTACTTCGGA,CATTANTTCGAA,CATTATTTCGAA,CATTGCTTCGAA,CTTTACTTCGAA,TATTACTTCGAA	220	1,1,2,1,1,1,1,1
Lib10^3 1 ng	CATTATATGGGA	CATCATATGGGA,CATTATATGGGT,CATTATNTGGGA	162	1,1,1
Lib10^3 1 ng	CATTCTGCGACG	CAATCTGCGACG,CATTCTGCAACG,CATTCTGCGCCG,CATTCTGCGGCG,CATTCTGCGTCG	299	1,1,1,4,11
Lib10^3 1 ng	CATTGGCATGCA	CATAGGCATGCA,CATTGCCATGCA,CATTGGNATGCA,GATTGGCATGCA	222	2,1,1,1
Lib10^3 1 ng	CATTTAGCTTCG	CATTTAGCTTCT	114	1
Lib10^3 1 ng	CATTTGTTGTCT	AATTTGTTGTCT,CATATGTTGTCT,CATTTGGTGTCT,CATTTGTTGACT,CATTTGTTGCCT,CTTTTGTTGTCT	235	1,1,2,1,1,1
Lib10^3 1 ng	CATTTTGGGTCC	CATNTTGGGTCC,CATTCTGGGTCC,CATTTTGGATCC,CATTTTGGGGCC,CATTTTGTGTCC	302	1,1,1,1,1
Lib10^3 1 ng	CCAAAGTCACTA	CCAAAGGCACTA,CCAAAGTCACAA,CCAAAGTGACTA,CCAAAGTTACTA,CTAAAGTCACTA,GCAAAGTCACTA	225	1,1,1,1,1,1
Lib10^3 1 ng	CCAAATGGTAAG	CAAAATGGTAAG,CCAAANGGTAAG,CCAAATCGTAAG,CCAAATGGTACG,CCAAATGGTAGG,CCAAATGGTATG,CCANATGGTAAG	251	1,1,1,1,1,5,1
Lib10^3 1 ng	CCAAGTTGTTAA	CCAAGTCGTTAA,CCAAGTTGTAAA,CCAAGTTGTGAA,CCAGGTTGTTAA,CTAAGTTGTTAA	240	1,2,3,1,1
Lib10^3 1 ng	CCACGGCTGGTA	CCACCGCTGGTA,CCACGGCTGGTT,CCACGNCTGGTA,CCACGTCTGGTA	160	1,1,1,1
Lib10^3 1 ng	CCACGGTTGAGT	CCACGATTGAGT,CCACGGATGAGT,CCACGGTTGACT,CCACGGTTGGGT,CCACGGTTGTGT	280	1,1,1,6,3
Lib10^3 1 ng	CCACTCGGAGGC	CCACTCGGAGGA,CCACTCGGGGGC,CCACTCGGTGGC	211	1,5,2
Lib10^3 1 ng	CCACTGGGACAG	CCACCGGGACAG,CCACTGGGACAT,CCACTGGGACCG,CCACTGGGACGG,CCACTGGGACTG,CCACTGGGATAG,CCACTGGGGCAG,CCACTGGGTCAG,GCACTGGGACAG	377	1,1,1,1,1,1,1,4,1
Lib10^3 1 ng	CCAGATTTTTGG	CCAGATTTATGG,CCAGATTTTTCG,CCAGATTTTTGC,CCAGCTTTTTGG,CCAGGTTTTTGG,CCAGTTTTTTGG,TCAGATTTTTGG	254	2,2,1,1,2,1,1
Lib10^3 1 ng	CCAGGGCCTTGC	CCAGGGCCCTGC,CCAGGGNCTTGC,CTAGGGCCTTGC	234	1,1,1
Lib10^3 1 ng	CCAGTTCCAAGA	CCACTTCCAAGA,CCAGATCCAAGA,CCAGTTCCAACA,CCAGTTCCAAGT,CNAGTTCCAAGA	295	1,1,1,1,1
Lib10^3 1 ng	CCATATCGTTGG	CCATATCGTCGG,CCATATCGTGGG,CCATATGGTTGG	121	1,1,1
Lib10^3 1 ng	CCATTGCCGGTT	CCATTGCCGGAT	99	1
Lib10^3 1 ng	CCATTGTTTGAT	CCATTGTTTGAA,CCATTGTTTGCT,CCATTGTTTGGT,CCATTGTTTGTT	242	1,1,2,2
Lib10^3 1 ng	CCCACCTCTTCG	CCCACCNCTTCG,CCCACCTCTTCA,CCCACCTCTTCC,CCCANCTCTTCG,CCCTCCTCTTCG,CGCACCTCTTCG,TCCACCTCTTCG	228	1,1,2,1,1,1,1
Lib10^3 1 ng	CCCAGGTTACGT	CCCCGGTTACGT	134	1
Lib10^3 1 ng	CCCATATCGGAT	CCCATGTCGGAT	188	1
Lib10^3 1 ng	CCCATCAGGTAC	CCCATCACGTAC,CCCATCAGGCAC,CCCTTCAGGTAC	361	1,1,2
Lib10^3 1 ng	CCCCCTATAGCT	CCCCCTAAAGCT,CCCCCTATAGTT,CCCCCTNTAGCT,CGCCCTATAGCT	290	1,1,2,1
Lib10^3 1 ng	CCCCGACGCGTA	CCCCGACGCATA,CCCCGACGCGAA,CCCCGACGGGTA,CCCCGGCGCGTA,CCCCGTCGCGTA	151	1,1,1,2,1
Lib10^3 1 ng	CCCCGGTCTGCT	CCCCGGGCTGCT,CCCCGGNCTGCT,CCCGGGTCTGCT,CTCCGGTCTGCT	204	1,1,1,1
Lib10^3 1 ng	CCCGGTCAATTC		98
Lib10^3 1 ng	CCCTACAACGCG	CCCTACACCGCG,CCCTACANCGCG,CCCTACTACGCG,CCCTAGAACGCG,CGCTACAACGCG	293	1,1,2,1,1
Lib10^3 1 ng	CCCTCCGGTCAC	CCCTCCGGTTAC	99	1
Lib10^3 1 ng	CCCTGGTGCTAA	CCCTAGTGCTAA,CCCTGCTGCTAA,CCCTGGCGCTAA,CCCTGGTGCCAA	308	1,1,1,1
Lib10^3 1 ng	CCCTGTATAGGA	CCCTGAATAGGA,CCCTGTANAGGA	106	1,1
Lib10^3 1 ng	CCCTGTGATGGC	CCCTGTGGTGGC	24	1
Lib10^3 1 ng	CCCTTCTTCAGA	CCCTTCTTCAAA,CCCTTCTTCACA,CCCTTCTTCAGG,CCCTTCTTCAGT,CCCTTCTTTAGA	145	1,1,1,1,1
Lib10^3 1 ng	CCCTTTAACGTT	CCCATTAACGTT,CCCCTTAACGTT,CCCTTTAACATT,CCCTTTAACGAT,CCCTTTAACGTA,CCCTTTAAGGTT,CCCTTTANCGTT,CTCTTTAACGTT	188	1,1,1,1,1,1,1,1
Lib10^3 1 ng	CCGAATAGTCCA	CAGAATAGTCCA,CCGAATTGTCCA,CCGACTAGTCCA,TCGAATAGTCCA	285	2,1,1,1
Lib10^3 1 ng	CCGACATTAATT	ACGACATTAATT,CCGACATTTATT,CCGTCATTAATT	145	1,1,3
Lib10^3 1 ng	CCGAGATATTCA	ACGAGATATTCA,CCAAGATATTCA,CCGAGAAATTCA,CCGAGATATTTA,CCGAGCTATTCA,CCGAGNTATTCA,CCGGGATATTCA,CCGTGATATTCA,CTGAGATATTCA	225	1,1,1,1,1,1,1,1,1
Lib10^3 1 ng	CCGATCAGACTA	CCGATCAGGCTA,CCGATCAGTCTA,CCGATCNGACTA,CCGGTCAGACTA,CTGATCAGACTA	179	3,2,1,1,1
Lib10^3 1 ng	CCGATCTACCCG	CCGATCTACTCG,CCGATCTNCCCG,CCGATCTTCCCG,CCGCTCTACCCG	144	1,1,1,1
Lib10^3 1 ng	CCGCCGATCTAG	CCGCCCATCTAG,CCGCCGGTCTAG,CCGCCGTTCTAG,GCGCCGATCTAG	111	1,1,1,1
Lib10^3 1 ng	CCGCCTTTTAAT	CCACCTTTTAAT,CCGTCTTTTAAT,TCGCCTTTTAAT	162	1,1,2
Lib10^3 1 ng	CCGCTATGCCGC	CCGCTAGGCCGC,CCGCTATGCCGG,CCGCTATGCCGT,CCGCTCTGCCGC	314	1,1,3,1
Lib10^3 1 ng	CCGGCCGTTCCG	CCGGCCGGTCCG,CCGGCCGTTCCC	166	1,1
Lib10^3 1 ng	CCGGGTTTGTTG	CCGGGTNTGTTG,CCGGGTTTGATG	139	1,1
Lib10^3 1 ng	CCGGTCTTGTGC	CCCGTCTTGTGC,CCGGTCTTGGGC,CCGTTCTTGTGC,GCGGTCTTGTGC	293	1,1,1,1
Lib10^3 1 ng	CCGGTGGCTACA	CCGGTCGCTACA,CCGGTGGTTACA,CCGGTGTCTACA	290	1,1,1
Lib10^3 1 ng	CCGGTGTTGGAA	CCGGCGTTGGAA,CCGGTGATGGAA,CCGGTGGTGGAA,CCGGTGTTGCAA,CCGGTGTTGGGA,CCGGTGTTGGTA,CCTGTGTTGGAA	239	1,1,1,1,1,2,1
Lib10^3 1 ng	CCGTACGAACAG	CCGAACGAACAG,CCGTACGAACTG,CCGTACGAAGAG,CCGTACGACCAG,CCGTACGGACAG	209	1,4,2,1,1
Lib10^3 1 ng	CCGTACTCGTCC	CAGTACTCGTCC,CCGAACTCGTCC,CCGTACTCGGCC,CCTTACTCGTCC	155	1,1,1,1
Lib10^3 1 ng	CCGTAGCTACTA	CCGTAGCTGCTA	54	1
Lib10^3 1 ng	CCGTGAATCGTG	CCGGGAATCGTG,CCGTCAATCGTG,CCGTGAATCGAG,CCGTGGATCGTG,CCGTGTATCGTG	188	1,1,1,1,2
Lib10^3 1 ng	CCGTGTGTGAAC	CCGAGTGTGAAC,CCGNGTGTGAAC,CCGTGAGTGAAC,CCGTGNGTGAAC,CCGTGTGNGAAC,CCGTGTGTGGAC,CCGTGTGTGTAC	331	1,1,1,1,1,1,1
Lib10^3 1 ng	CCTACCTTGCTT	CCTTCCTTGCTT	52	1
Lib10^3 1 ng	CCTAGCATGTTG	CCTAGCAGGTTG,CCTAGCANGTTG,CCTAGCATGGTG	295	1,1,1
Lib10^3 1 ng	CCTATACTTCCA	CCTATACATCCA,CCTATTCTTCCA	233	1,1
Lib10^3 1 ng	CCTCAACGGACT	CCTCAACGAACT,CCTCAACGGACC,CCTCAACGGCCT,CCTCAACGGGCT,CCTCATCGGACT,TCTCAACGGACT	253	1,1,1,1,1,1
Lib10^3 1 ng	CCTCTGAGTCGT	CCTCTGAGGCGT,CCTCTGCGTCGT,CCTCTGGGTCGT,CCTCTGTGTCGT	172	1,1,5,4
Lib10^3 1 ng	CCTCTGGCTTTG	CCTCTGGCTTCG	112	1
Lib10^3 1 ng	CCTGAAGTTTCT	CATGAAGTTTCT,CCTGAAGTTACT,CCTGAANTTTCT,CCTGATGTTTCT	184	1,1,1,1
Lib10^3 1 ng	CCTGGAATGGGA	CCTGGANTGGGA	169	1
Lib10^3 1 ng	CCTGGCGGAGTT	ACTGGCGGAGTT,CCTGGCGCAGTT	35	1,1
Lib10^3 1 ng	CCTGGTTGGATG	CCTGCTTGGATG,CCTGGTNGGATG,CCTGGTTGCATG,CCTGGTTGGATC,CCTGGTTGGATT,CCTGGTTGGGTG,CCTGGTTGGTTG,CCTGGTTGTATG,CCTNGTTGGATG	394	1,1,1,1,2,2,6,2,2
Lib10^3 1 ng	CCTGTCGGTTCG	CCTGTCGGATCG,CCTGTCGGTGCG,CTTGTCGGTTCG	258	2,1,1
Lib10^3 1 ng	CCTTAACCTAAG	CCTAAACCTAAG,CCTTAACCTAAC,CCTTAACCTACG,CCTTAACCTAGG,CCTTAACCTATG,CCTTAACCTGAG,CCTTATCCTAAG,CCTTTACCTAAG	244	1,1,1,1,2,1,2,1
Lib10^3 1 ng	CCTTAATGTCTC	CCTCAATGTCTC,CCTTAATGACTC,CCTTAATGTGTC	228	1,1,1
Lib10^3 1 ng	CCTTCGCTCTGC	CATTCGCTCTGC	146	1
Lib10^3 1 ng	CCTTCTCCTCGA	CCTGCTCCTCGA,CCTTCTCCTCGG,CCTTCTCCTCGT,CCTTCTCCTCTA,TCTTCTCCTCGA	264	1,2,2,1,1
Lib10^3 1 ng	CCTTCTCTGCTA	CCTGCTCTGCTA,CCTTCTCTGCCA	221	1,1
Lib10^3 1 ng	CCTTCTGTGTGT	CCTTCTGTGTGA	160	1
Lib10^3 1 ng	CCTTGCGTCTCG	CCTNGCGTCTCG,CCTTGCGCCTCG,CCTTGCGTTTCG,CCTTGCTTCTCG	170	1,1,1,1
Lib10^3 1 ng	CCTTGGACACTT	CCTGGGACACTT,CCTTGCACACTT,CCTTGGACATTT,CCTTGGACTCTT,CCTTGGGCACTT,CCTTGGTCACTT,CCTTGTACACTT	285	1,2,1,1,1,1,1
Lib10^3 1 ng	CCTTTACCGTTT	CCTCTACCGTTT	90	2
Lib10^3 1 ng	CCTTTACGGGGT	CATTTACGGGGT,CCTTTAAGGGGT,CCTTTACGGGAT,CCTTTGCGGGGT	304	2,1,1,1
Lib10^3 1 ng	CCTTTGTGATTG	CCATTGTGATTG,CCTTTATGATTG,CCTTTGGGATTG,CCTTTGTGAATG,CCTTTGTGACTG,CCTTTGTGGTTG,CCTTTGTGTTTG,TCTTTGTGATTG	255	1,1,1,1,1,1,2,250
Lib10^3 1 ng	CCTTTTACCCCA		102
Lib10^3 1 ng	CCTTTTCCATTG	CATTTTCCATTG,CCTATTCCATTG,CCTTTTCCATGG	189	1,1,1
Lib10^3 1 ng	CCTTTTTTATCA	CCTNTTTTATCA,CCTTGTTTATCA,CCTTTTTTAACA	167	1,1,1
Lib10^3 1 ng	CCTTTTTTTTTC	CCTCTTTTTTTC	159	1
Lib10^3 1 ng	CGAAATTAGGCG	CGAAATTAGACG,GGAAATTAGGCG	128	1,1
Lib10^3 1 ng	CGAACTTCGCGT	CAAACTTCGCGT,CGAACNTCGCGT,CGAACTTCGCAT,CGAACTTCTCGT,CGCACTTCGCGT,CGGACTTCGCGT,CGTACTTCGCGT,GGAACTTCGCGT	322	1,1,1,1,3,3,2,1
Lib10^3 1 ng	CGAATCCAAACG	CGAATCCCAACG,CGATTCCAAACG,CGGATCCAAACG	232	1,2,1
Lib10^3 1 ng	CGAATGTTCTTA	CGAATATTCTTA,CGAATGCTCTTA,CGAATGTGCTTA,CGAATGTTCATA,CGAATGTTCGTA,CGAATNTTCTTA,CGGATGTTCTTA,CGTATGTTCTTA	276	1,1,1,1,1,2,1,1
Lib10^3 1 ng	CGACCTTTTGGT	CGACCATTTGGT,CGACCTTTTGTT,CGCCCTTTTGGT,CGGCCTTTTGGT,CGTCCTTTTGGT	169	2,1,1,1,2
Lib10^3 1 ng	CGACGTGCTAAG	CGACGGGCTAAG,CGACGTGCTAGG,CGCCGTGCTAAG,CGGCGTGCTAAG,CGTCGTGCTAAG	192	1,1,1,1,1
Lib10^3 1 ng	CGACTGTGTTTG	CCACTGTGTTTG,CGACTGGGTTTG,CGACTGTGGTTG,CGTCTGTGTTTG	244	2,2,1,4
Lib10^3 1 ng	CGAGAGTTGCCT	CGAGAGGTGCCT,CGAGAGTAGCCT,CGAGTGTTGCCT,CGCGAGTTGCCT,CGGGAGTTGCCT,CGTGAGTTGCCT,TGAGAGTTGCCT	173	2,1,2,1,1,2,1
Lib10^3 1 ng	CGAGGAGGGGTT	CGAGCAGGGGTT,CGAGGAGAGGTT,CGAGGAGGGCTT,CGAGGAGGGGAT,CGAGGAGGGGGT,CGAGGGGGGGTT,CGAGGTGGGGTT,CGTGGAGGGGTT	261	1,1,1,1,1,1,4,4
Lib10^3 1 ng	CGAGGCGGCGAT	CGAGGCGGAGAT,CGAGGCGGCGGT,CGAGGCGGGGAT,CGAGGCGGTGAT,CGTGGCGGCGAT	208	1,1,2,2,2
Lib10^3 1 ng	CGAGTCTGCATC	CGAGGCTGCATC,CGAGTCTGCTTC,CGAGTCTGGATC,CGAGTCTNCATC,CGAGTTTGCATC,CGTGTCTGCATC	237	1,1,1,1,1,6
Lib10^3 1 ng	CGATAGAAGCGC	CGATAGAAGCGT,CGATAGGAGCGC,CGATTGAAGCGC	329	1,1,1
Lib10^3 1 ng	CGATCCGTTGCA	CGATCCGGTGCA,CGGTCCGTTGCA,CTATCCGTTGCA	80	1,1,1
Lib10^3 1 ng	CGATCTTTTGCG		36
Lib10^3 1 ng	CGATTATAGGAT	CCATTATAGGAT,CGAGTATAGGAT,CGATTAAAGGAT,CGATTATAGGTT,CGGTTATAGGAT	275	2,1,1,1,2
Lib10^3 1 ng	CGATTCCGGTTG	CGAATCCGGTTG,CGANTCCGGTTG,CGATTCCCGTTG,CGATTCCGCTTG,CGATTCCGGATG,CGATTCCGGCTG,CGATTCCGGGTG,CGATTCCGTTTG,CGATTCCNGTTG	330	1,1,1,1,3,1,1,1,1
Lib10^3 1 ng	CGATTGAAGTTC	CAATTGAAGTTC,CGATTCAAGTTC,CGATTGAACTTC,CGATTGAAGTCC,CGATTGAAGTGC,CGATTGTAGTTC,CGATTNAAGTTC,CGTTTGAAGTTC	241	1,1,1,1,1,1,1,2
Lib10^3 1 ng	CGATTTCTTGAA	CGAATTCTTGAA,CGATTTCTTGAG,CGATTTCTTGCA,CGATTTCTTGTA,CGGTTTCTTGAA,TGATTTCTTGAA	244	1,1,1,1,1,1
Lib10^3 1 ng	CGATTTGCGTAA	CAATTTGCGTAA	27	1
Lib10^3 1 ng	CGCACCCGGAGT	CGCACCCGGCGT,CGCACCCGGGGT,CGCTCCCGGAGT	184	1,2,1
Lib10^3 1 ng	CGCATGTTTCGT	CGCATGGTTCGT,CGCATGTTTCGA,CGCATGTTTTGT	263	1,1,1
Lib10^3 1 ng	CGCCCGCATATT	CCCCCGCATATT,CGCCCGCAGATT,CGCCCGCATGTT,CGCCCGNATATT,CGCCCNCATATT,CGCCCTCATATT,CGGCCGCATATT,CGTCCGCATATT,TGCCCGCATATT	330	1,1,1,1,1,1,1,1,2
Lib10^3 1 ng	CGCCCTCTTCAA	CGCCCTCCTCAA,CGCCCTCTTCAG,CGCCCTCTTCTA,CGCCCTCTTNAA	305	1,1,1,1
Lib10^3 1 ng	CGCCGTTGCGTT	CGCCGCTGCGTT,CGCCGTGGCGTT,CGCCGTTGAGTT,CGCCGTTGCCTT,CGCCGTTGCGGT	287	1,1,1,1,1
Lib10^3 1 ng	CGCCTTGGCTTA	CGCCCTGGCTTA,CGCCTTGACTTA,CGCCTTGCCTTA,CGCCTTGGCATA,CGCCTTTGCTTA	270	1,1,1,1,1
Lib10^3 1 ng	CGCGTGGTATAT		54
Lib10^3 1 ng	CGCTATCAATAG	CGCTATCATTAG,CTCTATCAATAG	161	1,1
Lib10^3 1 ng	CGCTGATACGAC	CCCTGATACGAC,CGCTGATACGGC,CGCTGATACGTC,CGCTGNTACGAC,CGCTGTTACGAC	119	1,1,2,1,1
Lib10^3 1 ng	CGCTTACTTCTT	CGCATACTTCTT,CGCCTACTTCTT,CGCTTACTTCTG	158	2,3,1
Lib10^3 1 ng	CGCTTGTCCTTG	CGCATGTCCTTG,CGCCTGTCCTTG,CGCGTGTCCTTG,CGCTGGTCCTTG,CGCTTGGCCTTG,TGCTTGTCCTTG	228	4,5,1,1,1,1
Lib10^3 1 ng	CGGACGTCCCCA	AGGACGTCCCCA,CGCACGTCCCCA,CGGACGCCCCCA,CGGACGTCTCCA,CGGACTTCCCCA,CGGAGGTCCCCA,CGGGCGTCCCCA	194	1,1,1,1,1,1,2
Lib10^3 1 ng	CGGAGCTAGCCT	CAGAGCTAGCCT,CGGCGCTAGCCT,CGGGGCTAGCCT,CGGTGCTAGCCT,CTGAGCTAGCCT,TGGAGCTAGCCT	289	2,1,4,8,1,1
Lib10^3 1 ng	CGGATTTTGCCA	CAGATTTTGCCA,CGCATTTTGCCA,CGGATTGTGCCA,CGGTTTTTGCCA,CTGATTTTGCCA	302	1,1,1,1,1
Lib10^3 1 ng	CGGCACACCTCC	CGCCACACCTCC	59	1
Lib10^3 1 ng	CGGCAGGATTAT	CAGCAGGATTAT,CGGCACGATTAT,CGGCAGCATTAT,CGGCAGGATTGT,CGGCAGGGTTAT,CGGCCGGATTAT	203	2,2,3,1,1,1
Lib10^3 1 ng	CGGCAGGTGTTT	CGCCAGGTGTTT,CGGAAGGTGTTT,CGGCAGGGGTTT,CGGCAGGTGATT,CGGCAGNTGTTT	208	1,1,1,1,1
Lib10^3 1 ng	CGGCCGTTGATT	CCGCCGTTGATT,CGGCCGATGATT,CGGCCGGTGATT,CGGCCGTCGATT,CGGCCGTTGGTT,CTGCCGTTGATT	144	1,1,1,1,1,1
Lib10^3 1 ng	CGGCGGGCGATG	CGCCGGGCGATG,CGGCGCGCGATG,CGGCGGGCGAGG,CGGCGGGCGCTG,CGGCGGGCGGTG,CGGCGGGCGTTG,CGGCGGGGGATG,CGGCGNGCGATG,CGGNGGGCGATG	287	1,2,1,1,6,5,1,1,1
Lib10^3 1 ng	CGGCGTCACCAC	CGGCGACACCAC,CGGCGTCNCCAC,CGTCGTCACCAC,TGGCGTCACCAC	278	1,1,1,1
Lib10^3 1 ng	CGGCTACTTCAT	CGGCTACTTCGT,CGGCTACTTCTT,CGGGTACTTCAT,TGGCTACTTCAT	239	1,1,2,1
Lib10^3 1 ng	CGGGATCGTTGA	CAGGATCGTTGA,CCGGATCGTTGA,CGGGAACGTTGA,CGGGANCGTTGA,CGGGATCGATGA,CGGGATCGCTGA,CGGGATCGTCGA,CGGGATCGTGGA,CGGGATCGTTGG,CGGGATCGTTGT,CGGGATCNTTGA,CGGGCTCGTTGA,CGGGGTCGTTGA,CGGGTTCGTTGA,CTGGATCGTTGA,TGGGATCGTTGA	311	1,1,1,1,2,1,1,4,2,1,1,1,1,1,1,2
Lib10^3 1 ng	CGGGATGTATTG	CGGAATGTATTG,CGGGATATATTG,CGGGATGGATTG,CGGGATGTGTTG,CGGGATGTTTTG,CGGGGTGTATTG,CGTGATGTATTG	154	1,1,1,1,2,1,1
Lib10^3 1 ng	CGGGGACCCGCA	AGGGGACCCGCA,CAGGGACCCGCA,CGGGCACCCGCA,CGGGGACCCACA,CGGGGACCCCCA,CGGGGGCCCGCA,CGGGGTCCCGCA	161	1,1,1,1,1,3,5
Lib10^3 1 ng	CGGGGGGCCTTC	CCGGGGGCCTTC,CGGCGGGCCTTC,CGGGGGGCTTTC,CGGGGGGGCTTC,GGGGGGGCCTTC	289	1,1,1,1,1
Lib10^3 1 ng	CGGGGGTGTGGA	CGAGGGTGTGGA,CGGCGGTGTGGA,CGGGCGTGTGGA,CGGGGGTGTCGA,CGGGGGTGTGCA,CGGGGGTGTGGG,CGGGGGTGTGGT,CGGTGGTGTGGA,GGGGGGTGTGGA,TGGGGGTGTGGA	290	1,1,1,1,1,3,1,2,1,1
Lib10^3 1 ng	CGGGTTAGCTAC	CGCGTTAGCTAC,CGGGTTAGCTTC,CGGGTTAGTTAC,CGGGTTCGCTAC	315	1,1,1,1
Lib10^3 1 ng	CGGGTTTAGAAC	CAGGTTTAGAAC,CGGGTTAAGAAC,CGGGTTTAGGAC,CGGGTTTAGTAC,CGGNTTTAGAAC,GGGGTTTAGAAC	221	1,1,1,3,1,1
Lib10^3 1 ng	CGGTACCCTTCC	CGGGACCCTTCC,CGGTACCCTACC,CGGTACCCTCCC,CGGTACCCTTCG,CGGTANCCTTCC,CTGTACCCTTCC	222	2,1,1,1,1,1
Lib10^3 1 ng	CGGTCGCGATCG	CCGTCGCGATCG,CGCTCGCGATCG,CGGACGCGATCG,CGGTCCCGATCG,CGGTCGCGAACG,CGGTCGCGGTCG,CGGTCGGGATCG,CGGTCGNGATCG,GGGTCGCGATCG	246	1,1,1,1,1,2,1,1,1
Lib10^3 1 ng	CGGTCGCGCGGC	CGGACGCGCGGC,CGGGCGCGCGGC,CGGTCGAGCGGC,CGGTCGCGCCGC,CGGTCGCGCGGT	207	3,2,1,1,1
Lib10^3 1 ng	CGGTCGGTCGGT	CGGTCGCTCGGT,CGGTCGGGCGGT,CGGTCGGTCGGC,CGGTCGGTCGGG,CGGTCGGTCGTT,CGGTCTGTCGGT	253	1,1,2,1,1,1
Lib10^3 1 ng	CGGTCTTCTTAA	CCGTCTTCTTAA,CGGACTTCTTAA,CGGCCTTCTTAA,CGGGCTTCTTAA,CGGTCTTCTTAC,CGGTCTTCTTAT,CTGTCTTCTTAA,GGGTCTTCTTAA	306	1,1,1,1,1,1,1,1
Lib10^3 1 ng	CGGTGGATTATC	CGGAGGATTATC,CGGGGGATTATC,CGGTGGATTCTC	189	1,1,1
Lib10^3 1 ng	CGGTGGCACTGT	CCGTGGCACTGT,CGGAGGCACTGT,CGGGGGCACTGT,CGGTGACACTGT,CGGTGGCACTGA,CGGTGGCACTGG,CGGTGGCTCTGT,CGTTGGCACTGT	270	1,1,2,2,1,1,1,1
Lib10^3 1 ng	CGGTTCGCCTTC	CGGATCGCCTTC,CGGCTCGCCTTC,CGGTACGCCTTC,CGGTTAGCCTTC,CGGTTCNCCTTC	119	2,1,2,1,1
Lib10^3 1 ng	CGGTTTCCACGT	CGGATTCCACGT,CGGGTTCCACGT,CGGTTACCACGT,CGGTTTCCACAT,CGGTTTTCACGT	222	3,2,1,1,1
Lib10^3 1 ng	CGTAATAAATTG	CGTAATANATTG	237	1
Lib10^3 1 ng	CGTACGAATGCC	CGTACGAAAGCC,CGTACGAATGCT,CGTACGACTGCC	100	2,1,1
Lib10^3 1 ng	CGTATACCCCCT		44
Lib10^3 1 ng	CGTATTAATTTG	CGAATTAATTTG,CGGATTAATTTG,CGTAGTAATTTG,CGTATTAATATG,CGTATTACTTTG,CGTTTTAATTTG	269	1,1,1,1,1,1
Lib10^3 1 ng	CGTATTACCTGA	CCTATTACCTGA,CGAATTACCTGA,CGTATCACCTGA,CGTATTACCCGA,CGTATTACCTGG,CGTATTACCTGT	156	1,1,1,1,2,1
Lib10^3 1 ng	CGTCCGCTGACT	CGCCCGCTGACT,CGTCCGCTGCCT,CGTCCGCTGTCT,CGTCCNCTGACT	182	1,1,1,1
Lib10^3 1 ng	CGTCGAGGTTCC	CGACGAGGTTCC,CGGCGAGGTTCC,CGTCGAGGTTGC,CGTCGGGGTTCC,CGTCGTGGTTCC	266	1,1,1,3,4
Lib10^3 1 ng	CGTCTGGGCCGG	CGACTGGGCCGG,CGTCTGGGCCGA,CGTCTGGGCCGC,CGTTTGGGCCGG	277	1,1,2,2
Lib10^3 1 ng	CGTCTGTGAAGC	CATCTGTGAAGC,CGGCTGTGAAGC,CGTCTCTGAAGC,CGTCTGGGAAGC,CGTCTGTGCAGC,CGTCTGTGGAGC	315	1,1,1,1,1,6
Lib10^3 1 ng	CGTGACCTTTGG	CGTGACCTTAGG,CGTGACNTTTGG,CGTGANCTTTGG,CGTGGCCTTTGG,CGTGTCCTTTGG	249	1,1,1,2,3
Lib10^3 1 ng	CGTGTACGCCGG	CCTGTACGCCGG,CGAGTACGCCGG,CGGGTACGCCGG,CGTGAACGCCGG,CGTGGACGCCGG,CGTGTACGCTGG,CGTGTATGCCGG,CGTGTGCGCCGG	319	1,1,1,2,1,1,2,1
Lib10^3 1 ng	CGTGTGCGGTCC	CGTGTGCAGTCC,CGTGTGCGGTCA,CGTGTNCGGTCC	138	1,1,1
Lib10^3 1 ng	CGTTACTGTATC	CGTCACTGTATC,CGTGACTGTATC,CGTTACTGAATC,CGTTACTNTATC,CGTTATTGTATC	264	1,5,1,1,1
Lib10^3 1 ng	CGTTAGTATGTG	CGATAGTATGTG,CGTAAGTATGTG,CGTCAGTATGTG,CGTNAGTATGTG,CGTTAGTATGGG,CGTTAGTNTGTG	340	1,2,3,1,1,1
Lib10^3 1 ng	CGTTATTCTACC	CGATATTCTACC,CGCTATTCTACC,CGTAATTCTACC,CGTCATTCTACC,CGTGATTCTACC,CGTTATTCTATC,CGTTATTCTCCC,CGTTATTNTACC,TGTTATTCTACC	232	1,1,5,2,3,1,1,1,1
Lib10^3 1 ng	CGTTCGTTAATT	CGTACGTTAATT,CGTCCGTTAATT,CGTGCGTTAATT,CGTTCATTAATT,CGTTCCTTAATT,CGTTCGATAATT,CGTTCGTTATTT	202	2,3,2,1,1,1,1
Lib10^3 1 ng	CGTTGATCTTGT	CGATGATCTTGT,CGTAGATCTTGT,CGTGGATCTTGT,CGTTAATCTTGT,CGTTGATCTTGG,CGTTGCTCTTGT,CGTTGGTCTTGT,CGTTGTTCTTGT	241	1,2,4,1,1,1,5,3
Lib10^3 1 ng	CGTTGCTCCGTC	AGTTGCTCCGTC,CGGTGCTCCGTC,CGTAGCTCCGTC,CGTGGCTCCGTC,CGTTGCTCCGAC,CGTTGCTCCGGC,CGTTGCTGCGTC,CGTTGGTCCGTC	301	1,2,1,1,1,1,1,1
Lib10^3 1 ng	CGTTTCATGGGG	CGATTCATGGGG,CGCTTCATGGGG,CGGTTCATGGGG,CGTATCATGGGG,CGTCTCATGGGG,CGTGTCATGGGG,CGTTTCANGGGG	163	1,1,1,5,1,2,1
Lib10^3 1 ng	CGTTTGTCCCCT	AGTTTGTCCCCT,CGATTGTCCCCT,CGTATGTCCCCT,CGTCTGTCCCCT,CGTGTGTCCCCT,CGTTTGNCCCCT,CGTTTGTCACCT,CGTTTGTCCCCA	260	1,1,4,2,4,1,1,1
Lib10^3 1 ng	CGTTTTAGTGTC	CGTATTAGTGTC,CGTCTTAGTGTC,CGTGTTAGTGTC	88	3,2,1
Lib10^3 1 ng	CGTTTTGTGGTG	CGTCTTGTGGTG,CGTGTTGTGGTG,CGTNTTGTGGTG,CGTTTTGGGGTG,CGTTTTGTGGTC,GGTTTTGTGGTG	316	3,1,1,1,1,1
Lib10^3 1 ng	CTAAAAACGATC		42
Lib10^3 1 ng	CTAACGGCATGT	CTAACGGCATGG,CTANCGGCATGT,GTAACGGCATGT	308	2,1,1
Lib10^3 1 ng	CTACCTGGAGTC	CTACCTCGAGTC,CTACCTGCAGTC,CTACCTGGAGAC,CTACCTGGGGTC,CTACCTGGTGTC,CTACCTTGAGTC,CTACNTGGAGTC	217	1,1,1,1,6,1,1
Lib10^3 1 ng	CTACTCTCGAGC	CTACTCTTGAGC	42	1
Lib10^3 1 ng	CTAGGGGTTGGG	CTAGGGGATGGG,CTANGGGTTGGG,CTTGGGGTTGGG	203	1,1,1
Lib10^3 1 ng	CTAGTAGACTTG	CTAGCAGACTTG,CTAGGAGACTTG,CTAGTAGTCTTG	229	1,1,3
Lib10^3 1 ng	CTAGTGCGTGTG	CTAGTGCATGTG,CTAGTGCGGGTG,CTAGTGCGTCTG,CTAGTGCGTGGG,CTAGTTCGTGTG	307	1,1,1,4,1
Lib10^3 1 ng	CTATCACCCTTT	CTAACACCCTTT,CTACCACCCTTT,CTATCACNCTTT	154	1,1,1
Lib10^3 1 ng	CTATCGAGGTAT	CTATCGGGGTAT	89	2
Lib10^3 1 ng	CTATGCGTGTTT	CTAAGCGTGTTT,CTATGCGAGTTT,CTATGNGTGTTT	124	1,2,1
Lib10^3 1 ng	CTATGTACCATA	CTATGAACCATA,CTATGTACCATC,CTATGTAGCATA,CTATGTATCATA	168	1,1,1,1
Lib10^3 1 ng	CTATGTGCGCTT	CTATGTGCGCCT,CTATGTGTGCTT,CTATTTGCGCTT	167	2,1,1
Lib10^3 1 ng	CTATTTGGTCTC	CTATCTGGTCTC	201	1
Lib10^3 1 ng	CTCAGAGGTTGA	CTCAGAGGATGA,CTCAGAGGTGGA,CTCAGAGGTTGG,CTCAGCGGTTGA,CTCAGTGGTTGA	226	1,1,2,1,1
Lib10^3 1 ng	CTCATCCCTGTG	CTCATCCCTCTG,CTCATCCCTGCG,CTCATNCCTGTG	307	1,2,1
Lib10^3 1 ng	CTCATTGCCTGC	CTCAGTGCCTGC,CTCATAGCCTGC,CTCATTGCCAGC,CTCATTGCCTTC,CTCNTTGCCTGC	282	1,1,1,1,1
Lib10^3 1 ng	CTCCCAGTGACC	CGCCCAGTGACC,CTCCCAGTGCCC,CTCCCAGTGGCC,CTCCCAGTGTCC	196	1,1,1,1
Lib10^3 1 ng	CTCCGAACCAAA	CTCCGAACGAAA,CTCCGAANCAAA,CTCCGATCCAAA,CTCCGGACCAAA,CTCCGTACCAAA	192	1,1,1,2,7
Lib10^3 1 ng	CTCCGGTGGATT	CTCCGGTGGATG	59	1
Lib10^3 1 ng	CTCCTTGATAAC	CTCCTTGAAAAC,CTCCTTGATACC,CTCCTTGATTAC,CTCCTTGTTAAC	254	1,1,1,2
Lib10^3 1 ng	CTCGGGGCATCG	CTCGCGGCATCG,CTCGGCGCATCG,CTCGGGCCATCG,CTCGGGGCATTG,CTCGGGGCGTCG,CTCGGGNCATCG	242	1,1,1,1,1,1
Lib10^3 1 ng	CTCGTGGCCAAT	ATCGTGGCCAAT,CACGTGGCCAAT,CCCGTGGCCAAT,CTCGAGGCCAAT,CTCGGGGCCAAT,CTCGTGACCAAT,CTCGTGGCCAAA,CTCGTGGCCAAG	401	1,1,1,2,2,2,1,1
Lib10^3 1 ng	CTCGTGTGTTCT	CGCGTGTGTTCT,CTCATGTGTTCT,CTCGTCTGTTCT,CTCGTGGGTTCT,CTCGTGTGATCT,CTCGTGTGGTCT,GTCGTGTGTTCT	307	2,1,1,1,1,1,1
Lib10^3 1 ng	CTCTACGCGTCT	CTCTACGCGACT	23	1
Lib10^3 1 ng	CTCTATGATCAA	CACTATGATCAA,CTCTATGCTCAA,CTCTATGTTCAA	261	1,1,1
Lib10^3 1 ng	CTCTCGAATCGG	CTCTCGAATCCG,CTCTCGAATCGC,CTCTCGGATCGG,CTCTCGNATCGG,CTCTCNAATCGG	251	1,1,2,1,1
Lib10^3 1 ng	CTCTGGCCATCT	CACTGGCCATCT,CTCTGGTCATCT	209	1,1
Lib10^3 1 ng	CTGATTGTGGCC		39
Lib10^3 1 ng	CTGCAGATTGGT	CTGCAGATTGAT,CTGCAGGTTGGT,CTGCANATTGGT,CTGCTGATTGGT,TTGCAGATTGGT	253	1,1,2,1,1
Lib10^3 1 ng	CTGCCTCAATCT		289
Lib10^3 1 ng	CTGCCTGGACTC	CTGCCNGGACTC,CTGCCTGGCCTC,CTGGCTGGACTC,CTGTCTGGACTC	128	1,1,1,1
Lib10^3 1 ng	CTGCGACGATAG	CTGCGACCATAG,CTGCGACGATGG,CTGCGACGATTG,CTGCGACGGTAG,CTGCGGCGATAG,CTGCGTCGATAG	269	1,1,1,1,1,3
Lib10^3 1 ng	CTGCGGCTTGGT	CTGCGGCATGGT,CTGCGGCTTGGG,CTGCGGNTTGGT,CTGGGGCTTGGT,CTGTGGCTTGGT	226	2,1,1,1,1
Lib10^3 1 ng	CTGCGGTCTTTT	CTGCGCTCTTTT	90	1
Lib10^3 1 ng	CTGCTCTGGCCT	CTGCTCTGACCT	220	1
Lib10^3 1 ng	CTGCTTATGGGC	CTGCTTATGGCC,CTGCTTATGGTC,CTGCTTATGTGC	370	2,1,1
Lib10^3 1 ng	CTGCTTGTGGAG	CTGCTTGTGGCG,CTGCTTGTGGGG,CTGCTTGTGGTG,CTNCTTGTGGAG	228	1,13,6,1
Lib10^3 1 ng	CTGGAGTGTCGG	CTGCAGTGTCGG,CTGGAGTGTCGA,CTGGTGTGTCGG	142	2,1,2
Lib10^3 1 ng	CTGGGGGTCGCT	CTGAGGGTCGCT,CTGGGGGTCTCT,CTGGGNGTCGCT	190	1,1,1
Lib10^3 1 ng	CTGGGTTTGTAA	CAGGGTTTGTAA,CTGGGTATGTAA,CTGGGTTTGTAC,CTGGGTTTGTTA,CTGTGTTTGTAA	177	1,1,1,1,2
Lib10^3 1 ng	CTGGTATCATTG	CTGGGATCATTG	41	1
Lib10^3 1 ng	CTGGTTGTGCTG		49
Lib10^3 1 ng	CTGTAACGTGAG	CTGAAACGTGAG,CTGCAACGTGAG,CTGGAACGTGAG,CTGTAACGTGCG,CTGTAACGTGGG,CTGTAACGTGTG	297	1,1,2,1,9,10
Lib10^3 1 ng	CTGTAGGCGTCG	CTGTAGGCGACG,CTGTAGGCGTAG,CTGTAGGCGTCT,CTGTAGGCGTGG,CTGTAGGCGTTG,CTGTAGGNGTCG,CTGTTGGCGTCG,GTGTAGGCGTCG	237	2,2,1,1,2,1,1,1
Lib10^3 1 ng	CTGTATGCACAC	CTGGATGCACAC	220	2
Lib10^3 1 ng	CTGTGATGACCG	CTGTGATGGCCG,CTGTGGTGACCG	37	1,1
Lib10^3 1 ng	CTGTGGACTTCG	CAGTGGACTTCG,CTGAGGACTTCG,CTGGGGACTTCG,CTGTAGACTTCG,CTGTGAACTTCG,CTGTGGACTCCG,CTGTGGATTTCG,CTGTGGGCTTCG,CTGTGGTCTTCG	224	1,1,1,1,1,1,1,1,3
Lib10^3 1 ng	CTGTGTGCGGCT	CTGAGTGCGGCT,CTGCGTGCGGCT,CTGGGTGCGGCT,CTGTGTGCGACT,CTGTGTGCGTCT,CTGTGTGGGGCT,CTGTGTNCGGCT	364	3,1,1,1,1,1,1
Lib10^3 1 ng	CTGTGTTAGTGT	CTGTGTAAGTGT,CTGTGTTAGAGT,CTGTGTTATTGT,TTGTGTTAGTGT	289	1,2,1,1
Lib10^3 1 ng	CTGTTATGATGG	CTGGTATGATGG,CTGTTATGTTGG	196	1,1
Lib10^3 1 ng	CTGTTCCGTTCA	CTGGTCCGTTCA,CTGTTCCGATCA	170	2,1
Lib10^3 1 ng	CTGTTGAGACTG	CAGTTGAGACTG,CTGATGAGACTG,CTGGTGAGACTG,CTGTTGAGGCTG,CTGTTGAGTCTG,CTGTTGCGACTG,CTGTTGGGACTG,CTGTTGTGACTG	302	1,1,1,2,2,1,6,7
Lib10^3 1 ng	CTGTTGAGTGAA	CAGTTGAGTGAA,CTGATGAGTGAA,CTGGTGAGTGAA,CTGTTGAGTGTA,CTGTTGGGTGAA,CTGTTGTGTGAA	344	1,4,1,4,3,5
Lib10^3 1 ng	CTGTTGGATTTT	CTGATGGATTTT,CTGTTGGATATT	53	1,1
Lib10^3 1 ng	CTTACAATTTTT	CTTACAACTTTT	261	1
Lib10^3 1 ng	CTTACAGATAGT	CTTACAGATAAT,CTTACAGATAGA,CTTACAGATAGG	299	1,2,1
Lib10^3 1 ng	CTTACGCAGAGA	CATACGCAGAGA,CTTACGCACAGA,CTTACGCAGAGG,CTTACGCAGAGT,CTTACGCAGTGA,CTTAGGCAGAGA	230	1,1,1,1,6,2
Lib10^3 1 ng	CTTAGATTCCGT	CTTAGATTCCGC,CTTAGATTCTGT,CTTAGCTTCCGT,CTTAGGTTCCGT,CTTAGTTTCCGT,CTTTGATTCCGT	245	1,1,2,6,2,1
Lib10^3 1 ng	CTTAGCTCTGGA	CATAGCTCTGGA,CTTAGCTCTGGT,CTTAGGTCTGGA,CTTTGCTCTGGA	147	1,2,1,1
Lib10^3 1 ng	CTTAGTCCGTTG	CTTAGTCCGATG,CTTAGTCCGGTG,CTTAGTCCGTAG	278	2,1,1
Lib10^3 1 ng	CTTATAATGCTG	CGTATAATGCTG,CTTATAAAGCTG,CTTATAATGGTG	236	1,1,1
Lib10^3 1 ng	CTTATTCCTCTA	CTTNTTCCTCTA	269	1
Lib10^3 1 ng	CTTGAAAGACGT	CTAGAAAGACGT,CTTGAAAGACCT,CTTGAAAGACGA,CTTGAAAGACGG,CTTGAAAGGCGT,CTTGAAAGTCGT,CTTGGAAGACGT,CTTGTAAGACGT	292	1,1,1,2,2,1,3,1
Lib10^3 1 ng	CTTGAAGACGGA	CTTCAAGACGGA,CTTGAAGACCGA,CTTGAAGACGGG,CTTGAAGAGGGA,CTTGAAGGCGGA,CTTGAAGTCGGA,CTTGAGGACGGA,CTTGATGACGGA,CTTGNAGACGGA,CTTGTAGACGGA	194	1,1,2,1,2,3,1,1,1,3
Lib10^3 1 ng	CTTGACGTTTCC	CATGACGTTTCC,CGTGACGTTTCC,CTTGACGGTTCC,CTTGACGTATCC,CTTGGCGTTTCC,CTTGTCGTTTCC,TTTGACGTTTCC	232	1,1,1,2,3,4,1
Lib10^3 1 ng	CTTGGGTTAGCT	CTTGGGATAGCT,CTTGTGTTAGCT	190	1,1
Lib10^3 1 ng	CTTGGTCTCGTC	CTTGGACTCGTC,CTTGGNCTCGTC,CTTGGTCNCGTC,CTTNGTCTCGTC	211	1,1,1,1
Lib10^3 1 ng	CTTGGTTAAACG	CTAGGTTAAACG,CTTGCTTAAACG,CTTGGCTAAACG,CTTGGGTAAACG,CTTGGTGAAACG,CTTGGTTAAATG,CTTGGTTAAGCG,CTTGGTTATACG,CTTNGTTAAACG	173	1,3,1,1,1,1,1,1,1
Lib10^3 1 ng	CTTGTGCATCCG	CTTGGGCATCCG	147	2
Lib10^3 1 ng	CTTTACGGTGTT	CTTTACGATGTT,CTTTACGCTGTT,CTTTACGGAGTT,CTTTACGGTGAT,TTTTACGGTGTT	312	1,1,1,1,1
Lib10^3 1 ng	CTTTATTATTTG		197
Lib10^3 1 ng	CTTTATTGAAAG	CTTTACTGAAAG,CTTTATNGAAAG,CTTTATTGAATG,CTTTATTGAGAG,CTTTATTGCAAG,CTTTATTGGAAG,CTTTATTGTAAG	163	1,1,1,1,1,1,1
Lib10^3 1 ng	CTTTCGAACTGC	CTGTCGAACTGC,CTTACGAACTGC,CTTCCGAACTGC,CTTTCGAACTCC,CTTTCGACCTGC,CTTTCGGACTGC,CTTTCGNACTGC,CTTTCGTACTGC,CTTTGGAACTGC	196	1,1,1,1,1,1,1,3,1
Lib10^3 1 ng	CTTTCGGTCTTT	CTATCGGTCTTT,CTTTCGGTGTTT,CTTTCGTTCTTT,CTTTTGGTCTTT	186	1,1,1,1
Lib10^3 1 ng	CTTTCGTTACGA	CCTTCGTTACGA,CTATCGTTACGA,CTGTCGTTACGA,CTTTCGGTACGA,CTTTCGTTACCA,CTTTCGTTACGG,CTTTCGTTACGT	157	1,1,1,1,1,1,1
Lib10^3 1 ng	CTTTGAAGCCTT	CGTTGAAGCCTT,CTTTCAAGCCTT,CTTTGATGCCTT,CTTTGGAGCCTT,CTTTGTAGCCTT	263	1,1,1,3,4
Lib10^3 1 ng	CTTTGAGATGTC	CCTTGAGATGTC,CTGTGAGATGTC,CTTGGAGATGTC,CTTTGAGATGCC,CTTTGAGATGTA,CTTTGAGGTGTC,CTTTGCGATGTC,CTTTGGGATGTC,CTTTGTGATGTC	348	1,1,1,1,1,1,1,5,2
Lib10^3 1 ng	CTTTTATTACTA	CTTATATTACTA,CTTTNATTACTA,GTTTTATTACTA,TTTTTATTACTA	204	1,1,1,1
Lib10^3 1 ng	CTTTTCACTTCC	CTTATCACTTCC,CTTCTCACTTCC,GTTTTCACTTCC	176	1,1,1
Lib10^3 1 ng	CTTTTCTCTGCG	CTTCTCTCTGCG,CTTTGCTCTGCG,CTTTTCCCTGCG,CTTTTCTCTCCG,CTTTTCTCTGCC,CTTTTCTCTGTG,CTTTTCTNTGCG	206	1,1,1,1,1,1,1
Lib10^3 1 ng	CTTTTGAGTTAT	CTTTGGAGTTAT,CTTTTGTGTTAT	280	1,3
Lib10^3 1 ng	CTTTTTGATTTC	CTTATTGATTTC,CTTGTTGATTTC,CTTTGTGATTTC,CTTTTTCATTTC,CTTTTTGGTTTC,CTTTTTGTTTTC	182	1,1,1,1,1,1
Lib10^3 1 ng	GAAAGCCAGCTA	GAAAGCCAGCTT,GAAAGCCNGCTA,GAAAGCCTGCTA,GAAAGGCAGCTA,GAAAGNCAGCTA,GCAAGCCAGCTA,GTAAGCCAGCTA	273	1,1,1,1,1,1,2
Lib10^3 1 ng	GAAATTTAACAC	GAAATGTAACAC,GAAATNTAACAC,GAAATTTAACAT,GAAATTTACCAC,GAAATTTATCAC,GAAATTTNACAC,GCAATTTAACAC,GGAATTTAACAC,GTAATTTAACAC	271	1,1,1,1,1,1,1,2,1
Lib10^3 1 ng	GAACAAAGCAGG	GGACAAAGCAGG	60	1
Lib10^3 1 ng	GAACGGACTCGC	GAACGCACTCGC,GAACGGACTAGC,GAACGGTCTCGC,GCACGGACTCGC,GGACGGACTCGC	148	1,1,2,1,2
Lib10^3 1 ng	GAACTCCCACTA	GAACTCCCACTT,GAACTCNCACTA,GGACTCCCACTA,GTACTCCCACTA	200	1,2,5,2
Lib10^3 1 ng	GAAGCCCACTAA	GAAGCCCACTAG,GAAGCTCACTAA,GAAGGCCACTAA,GATGCCCACTAA,GGAGCCCACTAA,GTAGCCCACTAA	211	1,1,1,1,1,3
Lib10^3 1 ng	GAAGGGCTCCCC	GAAGGTCTCCCC,GGAGGGCTCCCC,GTAGGGCTCCCC	219	1,1,1
Lib10^3 1 ng	GAAGGTCGGGTC	GAAGATCGGGTC,GAAGGCCGGGTC,GAAGGTCGGGAC,GAAGGTCGGGTA,GATGGTCGGGTC	179	1,1,1,1,2
Lib10^3 1 ng	GAAGTCTGACGT	GAAGCCTGACGT,GAAGGCTGACGT,GAAGTCTGATGT,GAAGTCTGGCGT,GAAGTCTGTCGT,GAAGTTTGACGT,GCAGTCTGACGT,GGAGTCTGACGT,GTAGTCTGACGT	288	1,1,1,4,4,1,2,1,1
Lib10^3 1 ng	GAAGTTTGTGTC	GAAATTTGTGTC,GAAGATTGTGTC,GAAGGTTGTGTC,GAAGTCTGTGTC,GAAGTGTGTGTC,GAAGTNTGTGTC,GAAGTTTGAGTC,GAAGTTTGGGTC,GAAGTTTGTATC,GAAGTTTGTGGC,GAAGTTTGTGTT,GATGTTTGTGTC,GGAGTTTGTGTC,GTAGTTTGTGTC	361	1,1,2,1,1,1,1,1,1,1,1,1,2,1
Lib10^3 1 ng	GAATCAGAGCAA	GAACCAGAGCAA,GAATCAGAACAA,GAATCAGAGAAA,GAATCAGGGCAA,GAATCAGTGCAA,GGATCAGAGCAA	263	1,1,1,2,5,2
Lib10^3 1 ng	GAATGTATTCTT	GAATGAATTCTT,GAATGTANTCTT,GAATGTATTGTT,GAATGTGTTCTT	149	1,1,1,1
Lib10^3 1 ng	GAATTGTGTTCG	GAATTGCGTTCG,GAATTGTGATCG,GAATTGTGCTCG,GAATTGTGGTCG,GTATTGTGTTCG	297	1,1,1,1,1
Lib10^3 1 ng	GAATTTCAAGCA	GAAGTTCAAGCA,GAANTTCAAGCA,GAATCTCAAGCA,GAATTGCAAGCA,GAATTTCACGCA,GAATTTCAGGCA,GGATTTCAAGCA,GTATTTCAAGCA	359	1,1,1,1,2,1,2,2
Lib10^3 1 ng	GACCCCCTTTCT	CACCCCCTTTCT,GACCCCCTTACT,GGCCCCCTTTCT,GTCCCCCTTTCT	239	1,1,3,3
Lib10^3 1 ng	GACCTTTGTTAA	AACCTTTGTTAA,GACCTCTGTTAA,GACCTTNGTTAA,GACCTTTCTTAA,GACCTTTGATAA,GACGTTTGTTAA,GGCCTTTGTTAA,TACCTTTGTTAA	253	1,1,1,1,1,1,2,1
Lib10^3 1 ng	GACGATTCTGTA	GACGAGTCTGTA,GACGATACTGTA,GACGGTTCTGTA,GGCGATTCTGTA,GTCGATTCTGTA	182	1,1,1,1,1
Lib10^3 1 ng	GACGGACGCTTC	GACGGAAGCTTC,GACGGACGCATC,GACGGACGCGTC,GACGGGCGCTTC,GGCGGACGCTTC	150	1,1,1,1,1
Lib10^3 1 ng	GACGTAGTGTTT	GACGTAATGTTT,GACGTAGAGTTT,GACGTAGTGTAT,GACGTAGTGTGT,GACGTAGTGTTG,GACGTTGTGTTT,GACNTAGTGTTT,GGCGTAGTGTTT,GTCGTAGTGTTT	189	1,1,2,1,1,1,1,1,1
Lib10^3 1 ng	GACGTCCTGCCT	GTCGTCCTGCCT	174	1
Lib10^3 1 ng	GACTACGAGATT	GACTACGGGATT,GACTAGGAGATT,GGCTACGAGATT	192	1,1,1
Lib10^3 1 ng	GACTCACGCTTA	GACGCACGCTTA,GACNCACGCTTA,GACTCACGCTAA,GGCTCACGCTTA,GTCTCACGCTTA	332	1,1,1,1,1
Lib10^3 1 ng	GACTTTCTACTG	GCCTTTCTACTG,GTCTTTCTACTG	177	1,2
Lib10^3 1 ng	GAGACGTTAACG	GAAACGTTAACG,GAGACATTAACG,GAGACGATAACG,GAGACGGTAACG,GAGACGNTAACG,GAGACGTTATCG,GAGACTTTAACG,GAGATGTTAACG,GAGTCGTTAACG,GCGACGTTAACG,GGGACGTTAACG,GTGACGTTAACG	368	1,1,2,2,1,4,1,1,4,1,4,3
Lib10^3 1 ng	GAGAGTCACCTG	GAGAGCCACCTG,GAGAGTCACTTG,GAGAGTCTCCTG,GAGAGTTACCTG,GAGGGTCACCTG,GCGAGTCACCTG,GGGAGTCACCTG,GTGAGTCACCTG	314	1,1,1,1,3,2,2,3
Lib10^3 1 ng	GAGCATGCAGAT	GACCATGCAGAT,GAGCATGCACAT,GAGCATGCAGGT,GAGCATGNAGAT,GCGCATGCAGAT,GGGCATGCAGAT,GTGCATGCAGAT	280	1,1,1,1,1,5,6
Lib10^3 1 ng	GAGCCTGTAGGA	GAGCCAGTAGGA,GAGCCTGAAGGA,GAGCCTGTAAGA,GAGCCTGTACGA,GAGCCTGTAGGG,GAGCCTGTAGGT,GAGCCTGTATGA,GATCCTGTAGGA,GGGCCTGTAGGA,GTGCCTGTAGGA	322	1,1,1,1,1,1,1,1,2,4
Lib10^3 1 ng	GAGCGTGCTTGG	GACCGTGCTTGG,GAGCGTGCTCGG,GAGCGTGCTTCG,GAGGGTGCTTGG,GCGCGTGCTTGG,GGGCGTGCTTGG,GTGCGTGCTTGG	248	1,1,1,1,2,3,2
Lib10^3 1 ng	GAGCTCTGTCCT	GAGCTATGTCCT,GAGCTCTGACCT,GAGCTCTGGCCT,GAGCTCTGTCCC,GGGCTCTGTCCT,GTGCTCTGTCCT	281	1,2,1,2,6,4
Lib10^3 1 ng	GAGGATTCGCCT	GAGGACTCGCCT,GAGGATTCGACT,GGGGATTCGCCT,GTGGATTCGCCT	213	1,1,1,2
Lib10^3 1 ng	GAGGATTTTTAG	GAGGAGTTTTAG,GAGGATTTCTAG,GAGGATTTTTTG,GAGGGTTTTTAG,GAGGTTTTTTAG,GCGGATTTTTAG,GGGGATTTTTAG,GTGGATTTTTAG	211	1,1,3,1,1,1,1,2
Lib10^3 1 ng	GAGGCTAGGTTG	GAGGCTAGCTTG,GAGGCTAGGGTG,GAGGCTTGGTTG,GAGTCTAGGTTG,GGGGCTAGGTTG,GTGGCTAGGTTG	173	1,1,1,1,2,4
Lib10^3 1 ng	GAGGGCTATGAC	GAGGGTTATGAC	314	1
Lib10^3 1 ng	GAGGGGGTGGTT	CAGGGGGTGGTT,GAGAGGGTGGTT,GAGCGGGTGGTT,GAGGGAGTGGTT,GAGGGCGTGGTT,GAGGGGATGGTT,GAGGGGCTGGTT,GAGGGGGGGGTT,GAGGGGGTGCTT,GAGGGGGTGGCT,GAGGGGGTGGTC,GAGGGGGTGGTG,GAGGGTGTGGTT,GGGGGGGTGGTT,GTGGGGGTGGTT	370	1,1,2,1,1,1,1,2,3,2,1,1,1,2,1
Lib10^3 1 ng	GAGGTTCAGGGG	GAGATTCAGGGG,GAGGATCAGGGG,GAGGTTCGGGGG,GAGGTTCTGGGG,GTGGTTCAGGGG	146	1,1,1,1,3
Lib10^3 1 ng	GAGTGATGGATA	GAGAGATGGATA,GAGTGATGGGTA,GAGTGATGGNTA,GAGTGATGGTTA,GAGTGGTGGATA,GGGTGATGGATA,GTGTGATGGATA	273	1,2,1,1,1,2,1
Lib10^3 1 ng	GAGTTAGAGGTG	GAGATAGAGGTG,GAGTAAGAGGTG,GAGTTAAAGGTG,GAGTTAGAGGGG,GAGTTAGGGGTG,GAGTTAGNGGTG,GAGTTAGTGGTG,GGGTTAGAGGTG,GTGTTAGAGGTG	198	1,3,1,1,1,1,2,1,1
Lib10^3 1 ng	GAGTTAGCGTGG	GAGCTAGCGTGG,GAGGTAGCGTGG,GAGTAAGCGTGG,GAGTCAGCGTGG,GAGTTNGCGTGG,GAGTTTGCGTGG,GCGTTAGCGTGG,GGGTTAGCGTGG,GTGTTAGCGTGG	357	1,1,1,1,1,1,1,5,2
Lib10^3 1 ng	GAGTTATTCACA	CAGTTATTCACA,GAGGTATTCACA,GAGTAATTCACA,GAGTTATTCACT,GAGTTATTTACA,GGGTTATTCACA,GTGTTATTCACA	270	2,2,2,1,1,5,3
Lib10^3 1 ng	GAGTTGGATGCA	GAATTGGATGCA,GAGATGGATGCA,GAGGTGGATGCA,GAGTTGAATGCA,GAGTTGCATGCA,GAGTTGGATGCT,GAGTTGGGTGCA,GAGTTGGTTGCA,GGGTTGGATGCA,GTGTTGGATGCA	325	1,3,2,1,1,1,2,2,2,1
Lib10^3 1 ng	GAGTTTGTTTGA	GACTTTGTTTGA,GAGTTTGATTGA,GAGTTTGTTTGG,GAGTTTGTTTGT,GGGTTTGTTTGA,GTGTTTGTTTGA	326	1,2,3,3,1,2
Lib10^3 1 ng	GATACCTTCTCA	GATACCTTCTGA,GATGCCTTCTCA,GATTCCTTCTCA,GTTACCTTCTCA	222	1,1,1,2
Lib10^3 1 ng	GATAGAGTTGTA	GAAAGAGTTGTA,GATAAAGTTGTA,GATAGAGCTGTA,GATAGAGGTGTA,GATAGAGTAGTA,GATAGAGTTGGA,GATAGAGTTGTT,GATAGGGTTGTA,GATAGTGTTGTA,GTTAGAGTTGTA	295	2,1,1,1,1,1,1,3,2,1
Lib10^3 1 ng	GATATACGGGCG	GATATACGCGCG,GATATACGGCCG,GATATACGGGGG,GATATACGGGTG,GGTATACGGGCG	343	1,1,1,1,1
Lib10^3 1 ng	GATCATTTACTG	GATCATCTACTG,GATCATTTAGTG,GCTCATTTACTG	163	1,1,1
Lib10^3 1 ng	GATCGGCCGTCT	GATCGGCCCTCT,GATCGTCCGTCT,GGTCGGCCGTCT,GTTCGGCCGTCT	198	1,1,2,1
Lib10^3 1 ng	GATCTAGTTAAG	AATCTAGTTAAG,GATCTAGATAAG,GATCTAGTTACG,GATCTAGTTAGG,GATCTAGTTATG,GTTCTAGTTAAG	238	1,1,1,1,2,1
Lib10^3 1 ng	GATCTGTTTCGC	GATCTGATTCGC,GATCTGGTTCGC,GATCTGTTTTGC,GATGTGTTTCGC,GCTCTGTTTCGC,GGTCTGTTTCGC,GTTCTGTTTCGC	220	1,1,1,1,1,2,3
Lib10^3 1 ng	GATGAGAGGATA	GATGAGAAGATA,GATGAGAGCATA,GATGAGAGGAGA,GATGAGAGGTTA,GATGAGGGGATA,GATGAGTGGATA,GATGGGAGGATA,GATGTGAGGATA,GGTGAGAGGATA,GTTGAGAGGATA	618	2,1,1,2,1,1,4,7,3,4
Lib10^3 1 ng	GATGCAAAGAGA	GATGCAAAGAGC,GATGCAAAGGGA,GATGCAAAGTGA,GATGCAACGAGA,GATGCAATGAGA,GATGCNAAGAGA,GATGGAAAGAGA,GATGTAAAGAGA	233	1,5,3,1,1,1,1,1
Lib10^3 1 ng	GATGCACTCTTA	GGTGCACTCTTA	67	1
Lib10^3 1 ng	GATGCTTTTCGA	GAAGCTTTTCGA,GATGCTATTCGA,GATGCTTTACGA,GATGCTTTTCAA,GATGCTTTTCCA,GATGCTTTTCGG,GATGCTTTTCGT,GATGGTTTTCGA,GATNCTTTTCGA,GCTGCTTTTCGA,GTTGCTTTTCGA	390	1,1,1,1,1,1,2,1,1,1,2
Lib10^3 1 ng	GATGTTCCTCGG	GATGATCCTCGG,GGTGTTCCTCGG	231	1,1
Lib10^3 1 ng	GATGTTTGGTTA	GATCTTTGGTTA,GATGATTGGTTA,GATGCTTGGTTA,GATGTCTGGTTA,GATGTGTGGTTA,GATGTNTGGTTA,GATGTTTCGTTA,GATGTTTGCTTA,GATGTTTNGTTA	416	1,1,1,1,1,2,1,1,1
Lib10^3 1 ng	GATTACTTGTGA	GATCACTTGTGA,GATTACTTGAGA,GATTACTTGGGA,GATTACTTGTGT,GGTTACTTGTGA,GTTTACTTGTGA,TATTACTTGTGA	259	1,1,1,3,1,1,1
Lib10^3 1 ng	GATTATTGTTAT	GATTAATGTTAT,GATTANTGTTAT,GATTATNGTTAT,GATTATTGATAT,GATTATTGGTAT,GATTATTGTAAT,GGTTATTGTTAT	262	1,2,1,1,1,1,1
Lib10^3 1 ng	GATTCACGCCGG	AATTCACGCCGG,GATACACGCCGG,GATCCACGCCGG,GATTCACGCCGA,GCTTCACGCCGG,GTTTCACGCCGG	287	1,3,1,1,2,1
Lib10^3 1 ng	GATTCAGTGTGG	CATTCAGTGTGG,GATTCAGTGAGG,GATTCCGTGTGG,GGTTCAGTGTGG	263	1,1,1,1
Lib10^3 1 ng	GATTCTTAGACA	GATTCTTAAACA,GATTCTTACACA,GATTCTTAGCCA,GATTCTTAGTCA,GCTTCTTAGACA	114	1,1,1,1,1
Lib10^3 1 ng	GATTGATTTATG	GATTAATTTATG,GATTGATTTGTG,GATTGGTTTATG,GATTGNTTTATG,GGTTGATTTATG,GTTTGATTTATG	224	1,1,1,1,1,1
Lib10^3 1 ng	GATTGGCCCTTG	GATTGGCCCCTG,GATTGGCGCTTG,GATTGGCNCTTG,GGTTGGCCCTTG,GTTTGGCCCTTG	127	1,1,1,1,1
Lib10^3 1 ng	GATTTTTGGTTC	GAATTTTGGTTC,GATTTGTGGTTC,GATTTTTGGGTC,GATTTTTGGTTG,GCTTTTTGGTTC	260	1,1,1,1,1
Lib10^3 1 ng	GCAAAAGGTGTT	GCAAAAAGTGTT,GCAAAAGGTGAT,GCAAAAGGTGTC,GCAAGAGGTGTT,GCACAAGGTGTT	193	1,1,1,1,1
Lib10^3 1 ng	GCAACATAGGTA	GCAACANAGGTA,GCAACATAGCTA,GCAACATAGGGA,GCTACATAGGTA	369	1,3,1,1
Lib10^3 1 ng	GCAACTGCGGTA	GTAACTGCGGTA	82	2
Lib10^3 1 ng	GCAAGCACACAC		59
Lib10^3 1 ng	GCACAGATGTCC	GCACAGATGACC,GCACAGGTGTCC,GCACTGATGTCC,GCAGAGATGTCC,GCANAGATGTCC	273	1,3,1,1,1
Lib10^3 1 ng	GCACCCTACGAT	GCACCCTACGCT,GCACCCTACGGT,GCACCCTACGTT,GCACCCTCCGAT,GCTCCCTACGAT,TCACCCTACGAT	287	1,1,2,1,2,1
Lib10^3 1 ng	GCACTGCGCTTG	GCACTACGCTTG,GCACTGCACTTG,GCACTGCGCTTC,GCACTGCNCTTG,GCAGTGCGCTTG,GCTCTGCGCTTG	355	1,1,1,1,1,3
Lib10^3 1 ng	GCAGATGGAGCC	GCAGAGGGAGCC,GCAGATGAAGCC,GCAGATGCAGCC,GCAGATGGAACC,GCAGATGGGGCC,GCAGATGGTGCC,GCAGCTGGAGCC,GCAGGTGGAGCC	408	1,1,2,1,6,6,1,1
Lib10^3 1 ng	GCAGGGGTATAT	GAAGGGGTATAT,GCAGGAGTATAT,GCAGGGGAATAT,GCAGTGGTATAT	125	1,1,1,1
Lib10^3 1 ng	GCAGGGTTGTTC	GCACGGTTGTTC,GCAGGCTTGTTC,GCAGGGATGTTC,GCAGGGGTGTTC,GCAGGGTGGTTC,GCAGGGTTATTC,GCAGGGTTGGTC,GCAGGGTTGTGC,GCTGGGTTGTTC,GGAGGGTTGTTC	353	1,1,1,1,1,1,1,1,1,1
Lib10^3 1 ng	GCAGTGAATATG	GCAGTGANTATG,GCAGTGCATATG,GCAGTGGATATG	194	1,1,1
Lib10^3 1 ng	GCAGTGACCGTT	GCAGTGACCGTA,GCAGTGGCCGTT,GCAGTGTCCGTT,GCGGTGACCGTT	283	2,3,3,1
Lib10^3 1 ng	GCATATTTGACT	GCATATTTAACT,GCATATTTGGCT,GCATTTTTGACT	193	1,1,1
Lib10^3 1 ng	GCATCTTGTTCT	ACATCTTGTTCT,GCATCTAGTTCT,GCATCTTGTACT,GCTTCTTGTTCT	204	1,1,1,1
Lib10^3 1 ng	GCATGGTATCAC	GCATGGGATCAC,GCATGGTATTAC,GCATGGTNTCAC	253	1,1,1
Lib10^3 1 ng	GCATGTGATTAC	GCATGAGATTAC,GCATGCGATTAC,GCATGGGATTAC,GCATGTGATTAG	209	2,1,1,1
Lib10^3 1 ng	GCATGTGTCGTA	GTATGTGTCGTA	244	1
Lib10^3 1 ng	GCATTGTTTAGC	GAATTGTTTAGC,GCATTGATTAGC,GCATTGGTTAGC,GCATTGNTTAGC,GCATTGTTAAGC,GCATTGTTTACC,GCATTGTTTGGC,GTATTGTTTAGC	295	1,2,1,1,1,1,1,1
Lib10^3 1 ng	GCCAAGATAGTA	GACAAGATAGTA,GCCAAGAAAGTA,GCCAAGAGAGTA,GCCAAGATACTA,GCCAAGATAGTC,GCCAAGTTAGTA,GCCAANATAGTA,GCCACGATAGTA,TCCAAGATAGTA	335	1,1,1,1,1,1,1,1,1
Lib10^3 1 ng	GCCAATAGCTTG	GCCAATAGCTTT	186	1
Lib10^3 1 ng	GCCAATCACATA	GCCAATCAGATA	149	1
Lib10^3 1 ng	GCCAATCCTGTT	GCCAACCCTGTT,GCCAAGCCTGTT,GCCAGTCCTGTT,GCCNATCCTGTT	181	1,1,1,1
Lib10^3 1 ng	GCCATGCACTCG	GCCATGCACCCG,GCCATGCACTCA,GCCATGCACTCC	280	1,1,1
Lib10^3 1 ng	GCCCAGTGGGAG	GCCCAGTGGGGG,GCCCAGTGGGTG,GCGCAGTGGGAG	36	2,2,1
Lib10^3 1 ng	GCCCCGCGTTTA	GCCCCGCCTTTA,GCCCCGCGATTA,GCCCCGCGTTGA,GCCCCNCGTTTA	134	1,1,1,1
Lib10^3 1 ng	GCCCGACTATTA	CCCCGACTATTA,GCCCGTCTATTA,GCCTGACTATTA	203	1,4,1
Lib10^3 1 ng	GCCCTTGGAGTT	GCCCGTGGAGTT,GCCCTAGGAGTT,GCCCTGGGAGTT,GCCCTTGAAGTT,GCCCTTGCAGTT,GCCCTTGGAATT,GCCCTTGGACTT,GCCCTTGGAGAT,GCCCTTGGAGGT,GCCCTTGGAGTC,GCCCTTGGGGTT,GCCCTTGGTGTT,GCCCTTGNAGTT,GCCCTTGTAGTT	537	1,1,1,1,3,1,3,1,2,2,3,3,1,1
Lib10^3 1 ng	GCCGGCGTATCC	GCCGGCGAATCC,GCCGGCGGATCC,GCCGGCGTTTCC,GCCGGNGTATCC,GTCGGCGTATCC	154	1,1,1,1,1
Lib10^3 1 ng	GCCTGTTAGCAA	GCCTGATAGCAA,GCCTGCTAGCAA,GCCTGGTAGCAA,GCCTGTAAGCAA,GCCTGTTAGAAA,GCCTGTTAGCAG,GCCTGTTAGGAA,GGCTGTTAGCAA,GTCTGTTAGCAA,TCCTGTTAGCAA	357	1,1,1,1,1,1,1,1,1,1
Lib10^3 1 ng	GCCTTTTGTTAA	GCCTTNTGTTAA	96	1
Lib10^3 1 ng	GCGAGATAGCTG	GCGAGAGAGCTG,GCGAGATTGCTG,GCGAGCTAGCTG,GCGTGATAGCTG	132	1,1,1,1
Lib10^3 1 ng	GCGAGCCTTTTC	GCGAGCCTGTTC,GCGAGCCTTATC,GCGAGCCTTCTC,GCGAGCCTTGTC,GCGAGCCTTTCC,GCGAGCCTTTTG,GCGAGNCTTTTC,GCGGGCCTTTTC,GCGTGCCTTTTC,GTGAGCCTTTTC	220	4,1,1,1,1,1,1,2,2,1
Lib10^3 1 ng	GCGAGTACTACG	GAGAGTACTACG,GCGAGTACTATG,GCGCGTACTACG,GTGAGTACTACG	146	1,1,2,1
Lib10^3 1 ng	GCGATCTCTGTT	GCAATCTCTGTT,GCGATGTCTGTT,GCGGTCTCTGTT	160	1,1,2
Lib10^3 1 ng	GCGATCTGTCGT	ACGATCTGTCGT,GCAATCTGTCGT,GCCATCTGTCGT,GCGATCTCTCGT,GCGATCTGACGT,GCGATCTGCCGT,GCGATCTGTCGA,GCGATCTGTTGT	199	1,1,1,1,1,1,1,1
Lib10^3 1 ng	GCGCGTGCGTCT	CCGCGTGCGTCT,GCCCGTGCGTCT,GCGCATGCGTCT,GCGCGAGCGTCT,GCGCGTGTGTCT	351	1,1,1,1,1
Lib10^3 1 ng	GCGCGTTTAGGT	GAGCGTTTAGGT,GCGAGTTTAGGT,GCGCGATTAGGT,GCGCGGTTAGGT,GCGCGTATAGGT,GCGCGTTTAAGT,GCGCGTTTACGT,GCGCGTTTAGGG,GCGCGTTTCGGT,GCGGGTTTAGGT	254	1,1,1,3,1,1,1,1,1,1
Lib10^3 1 ng	GCGGACGTTTGC	CCGGACGTTTGC,GCGGACGTATGC,GCGGACGTCTGC,GCGGACGTGTGC,GCGGCCGTTTGC,GCGGGCGTTTGC,GCGGTCGTTTGC,GCGNACGTTTGC,GGGGACGTTTGC,GTGGACGTTTGC	179	1,5,2,1,1,1,3,1,1,1
Lib10^3 1 ng	GCGGAGGTCTAT	GCGGGGGTCTAT,GCGGTGGTCTAT	141	1,1
Lib10^3 1 ng	GCGGATCTTTTC	GCGGGTCTTTTC,GCGGTTCTTTTC	146	6,2
Lib10^3 1 ng	GCGGCTGGGGCA	GCCGCTGGGGCA,GCGGCNGGGGCA,GCGGCTCGGGCA,GCGGCTGGGGCT,GCGGCTGGGTCA,GCGGCTNGGGCA,GCGGGTGGGGCA,GCGTCTGGGGCA	324	1,1,1,1,2,1,1,2
Lib10^3 1 ng	GCGGTGACACCA	GCGGCGACACCA,GCGGTGAAACCA,GCGGTGACACGA,GCGGTGGCACCA,GCGGTGTCACCA,GGGGTGACACCA	278	1,1,1,3,5,1
Lib10^3 1 ng	GCGTGCATGCGA	GCGAGCATGCGA,GCGCGCATGCGA,GCGGGCATGCGA,GCGTGCAGGCGA,GCGTGCATGCCA,GCGTGCATGCGG,GCGTGCATGCGT,GCGTGGATGCGA,GTGTGCATGCGA	443	1,1,1,1,1,1,4,1,1
Lib10^3 1 ng	GCGTGGTAATCT	GCGTGGTAAACT,GCGTGGTAATGT	187	1,1
Lib10^3 1 ng	GCGTTATTAAGG	GCGATATTAAGG,GCGGTATTAAGG,GCGTTAGTAAGG,GCGTTATTAAGA,GCGTTATTAAGC,GCGTTATTATGG,GCGTTNTTAAGG,GTGTTATTAAGG	316	2,3,1,1,1,2,1,1
Lib10^3 1 ng	GCGTTCCTGTCG	GCCTTCCTGTCG,GCGATCCTGTCG,GCGCTCCTGTCG	40	1,1,1
Lib10^3 1 ng	GCGTTGTCGCGT	GCGATGTCGCGT,GCGGTGTCGCGT,GCGTTGTCCCGT,GCGTTGTCGCGG,GCGTTGTCGGGT	365	2,2,1,1,1
Lib10^3 1 ng	GCGTTTTGCAGG	GCGATTTGCAGG,GCGCTTTGCAGG,GCGGTTTGCAGG,GCGTGTTGCAGG,GCGTTNTGCAGG,GCGTTTGGCAGG,GCGTTTTGCTGG	316	1,1,1,1,1,1,3
Lib10^3 1 ng	GCTACGAATTTT	GCTACGATTTTT,GCTACGTATTTT	213	1,1
Lib10^3 1 ng	GCTACTTGCTCT	GCTACTTNCTCT	66	1
Lib10^3 1 ng	GCTAGACTTTAC	GATAGACTTTAC,GCTAGACTATAC,GTTAGACTTTAC	289	1,1,1
Lib10^3 1 ng	GCTAGCGGGCGT	GCTAGCGAGCGT,GCTAGCGGACGT,GCTAGCGTGCGT	232	1,1,1
Lib10^3 1 ng	GCTCAGGTTCGG	GCCCAGGTTCGG,GCTCAGGGTCGG,GCTCAGGTACGG,GCTCAGGTTCCG,GCTCANGTTCGG	153	1,1,1,1,1
Lib10^3 1 ng	GCTCCGGACCCG	GCCCCGGACCCG,GCTCCCGACCCG,GCTCCGCACCCG,GCTCCGGCCCCG,GCTCCGGGCCCG,GCTCCGGTCCCG,TCTCCGGACCCG	318	1,1,1,1,4,3,1
Lib10^3 1 ng	GCTCGAATGGCC	GCTCGAANGGCC,GCTCGAATGGCG,GCTCGTATGGCC,GCTNGAATGGCC	183	1,1,1,1
Lib10^3 1 ng	GCTCGTGGCAAG	GATCGTGGCAAG,GCCCGTGGCAAG,GCTCCTGGCAAG,GCTCGAGGCAAG,GCTCGGGGCAAG,GCTCGTGGCAAT,GCTCGTGGCACG,GCTCGTGGCATG,GCTCGTGGCGAG,GCTCGTGGCTAG,GCTCGTGGGAAG,GGTCGTGGCAAG	248	1,1,1,4,4,1,1,2,1,1,1,1
Lib10^3 1 ng	GCTCTCCCCGCT	GCTCCCCCCGCT,GCTCTCCCCTCT	253	1,1
Lib10^3 1 ng	GCTCTTCAAGGT	GCTCTTCAAGCT,GCTCTTCAAGGA,GCTCTTNAAGGT	180	1,1,1
Lib10^3 1 ng	GCTGATATTCTT	CCTGATATTCTT,GCGGATATTCTT,GCTGATACTCTT,GCTGATANTCTT,GCTGATATTCTG,GCTGATATTGTT,GCTGATATTNTT,GCTGTTATTCTT	293	1,1,1,1,2,1,1,1
Lib10^3 1 ng	GCTGATTTGTTT	GCAGATTTGTTT,GCTGATNTGTTT,GCTGATTGGTTT,GCTGATTTGGTT,GCTGGTTTGTTT,GCTGTTTTGTTT	428	1,1,1,2,1,1
Lib10^3 1 ng	GCTGCGTCGTTG	GATGCGTCGTTG,GCTGCGACGTTG,GCTGCGTCGATG,GCTGCGTCGCTG,GCTGCGTCGGTG,GCTGCGTCGTAG,GCTGCGTCGTGG	291	1,1,2,1,2,2,1
Lib10^3 1 ng	GCTGCTGGGTCT	GCAGCTGGGTCT,GCTGCTGGGACT	163	1,1
Lib10^3 1 ng	GCTGTGCCGTAT	GCTGTGCCGCAT,GCTGTGCCGGAT,GCTGTGCCGTAA	248	2,1,1
Lib10^3 1 ng	GCTTACTGTCCA	GCTNACTGTCCA,GCTTACGGTCCA,GCTTACTGTCCC,GCTTACTGTCCT,GCTTACTNTCCA	240	1,1,1,1,1
Lib10^3 1 ng	GCTTAGACTTCC	GCTGAGACTTCC,GCTTAGACTACC,GCTTAGACTGCC,GCTTAGACTTCA,GCTTAGANTTCC,GCTTAGCCTTCC,GCTTAGGCTTCC,GCTTAGTCTTCC	276	1,1,1,1,1,2,2,5
Lib10^3 1 ng	GCTTAGTTGATT	GCTTAGTTGGTT,GCTTAGTTGTTT,GCTTGGTTGATT	312	3,1,1
Lib10^3 1 ng	GCTTCACTCCGC	GCTTCNCTCCGC	131	1
Lib10^3 1 ng	GCTTCATAGCGA	GCGTCATAGCGA,GCTTCATAGAGA,GCTTCATAGCGG,GCTTCATAGCGT,GCTTCATAGTGA,GCTTCATCGCGA	272	1,1,2,3,1,1
Lib10^3 1 ng	GCTTCCGCAATG	ACTTCCGCAATG,GCTTCCGCACTG,GCTTCCGCATTG,GCTTCCGCGATG,GCTTCCNCAATG,GCTTCTGCAATG	321	1,2,2,1,1,1
Lib10^3 1 ng	GCTTCGTCCCGT	GCGTCGTCCCGT,GCTNCGTCCCGT,GCTTCGACCCGT,GCTTCGGCCCGT,GCTTCGTCCAGT,GCTTCGTCCCGA,GCTTCGTCCCGC,GCTTGGTCCCGT,GCTTTGTCCCGT	256	1,1,1,1,1,1,1,1,1
Lib10^3 1 ng	GCTTCTCATGCT	GCTTCTCATGCG,GCTTCTCTTGCT	165	1,1
Lib10^3 1 ng	GCTTCTGACACA	GATTCTGACACA,GCTTCGGACACA,GCTTCTGCCACA,GCTTCTGGCACA,GCTTCTGTCACA	205	1,1,1,1,1
Lib10^3 1 ng	GCTTGATAGGCT	GATTGATAGGCT,GCTTGATAGGAT	152	1,1
Lib10^3 1 ng	GCTTGCGAGTCA	GCTTGCGAGGCA,GCTTGCGAGTCC,GCTTGCGAGTGA,GCTTGCGTGTCA	260	1,1,1,1
Lib10^3 1 ng	GCTTGGAAGTAC	GCTAGGAAGTAC,GCTGGGAAGTAC,GCTTGCAAGTAC,GCTTGGAAGAAC,GCTTGGGAGTAC,GCTTGGTAGTAC	263	1,1,1,2,2,2
Lib10^3 1 ng	GCTTGGTAGGGC	GCTTGGTAGCGC,GCTTGGTTGGGC	230	1,1
Lib10^3 1 ng	GCTTGTAGATTG	GCTTGTACATTG	84	1
Lib10^3 1 ng	GCTTGTGGGAGT	CCTTGTGGGAGT,GATTGTGGGAGT,GCATGTGGGAGT,GCTTGCGGGAGT,GCTTGTGGGGGT,GCTTGTGGGTGT,GCTTGTGGTAGT,GTTTGTGGGAGT	380	1,1,1,1,4,3,1,1
Lib10^3 1 ng	GCTTGTTCTTTA		68
Lib10^3 1 ng	GCTTTGCCTTGC	GCTATGCCTTGC	81	1
Lib10^3 1 ng	GCTTTTTAGGGT	GATTTTTAGGGT	146	1
Lib10^3 1 ng	GGAAGAATTGAG	GAAAGAATTGAG,GGAACAATTGAG,GGAAGAATTGTG,GGAAGGATTGAG	265	2,1,22,1
Lib10^3 1 ng	GGAAGTGTTCTT	GGAAGGGTTCTT,GGAAGTATTCTT,GGAAGTGTCCTT,GGAAGTGTGCTT,GGAAGTGTTCTC,GGCAGTGTTCTT,GGGAGTGTTCTT,GTAAGTGTTCTT	381	2,1,1,1,1,1,1,1
Lib10^3 1 ng	GGAATTTAAATC	AGAATTTAAATC,GGAATTTNAATC,GGAGTTTAAATC	169	1,1,1
Lib10^3 1 ng	GGAATTTCTGTC	GCAATTTCTGTC,GGAATTTCTGTT	207	1,1
Lib10^3 1 ng	GGACACGATTCG	GCACACGATTCG,GGAAACGATTCG,GGACACGATTCC,GGACACGGTTCG,GGACACGTTTCG,GGACATGATTCG,GGCCACGATTCG,GGGCACGATTCG,GGTCACGATTCG,GTACACGATTCG	276	2,2,1,1,1,1,1,2,4,1
Lib10^3 1 ng	GGACGTGCACAG	GCACGTGCACAG,GGACGTGCACTG,GGACGTGCATAG,GGACGTGCTCAG,GGAGGTGCACAG,GGGCGTGCACAG,GGTCGTGCACAG	224	2,2,1,1,1,2,2
Lib10^3 1 ng	GGACTGACTCCA	GGACTCACTCCA,GGACTGCCTCCA,GGACTGGCTCCA,GGACTGTCTCCA,GGGCTGACTCCA,GGTCTGACTCCA,GTACTGACTCCA	262	1,1,3,11,1,2,1
Lib10^3 1 ng	GGACTTTGCAAG	AGACTTTGCAAG,GGACTATGCAAG,GGACTTTGCACG,GGACTTTGCATG,GGGCTTTGCAAG	243	1,2,1,1,3
Lib10^3 1 ng	GGAGCAACCTAT	GGAGCAACCTAA,GGAGCAACCTAC,GGCGCAACCTAT,GGGGCAACCTAT,GGTGCAACCTAT	280	1,1,2,1,5
Lib10^3 1 ng	GGAGGCGTTTAT	GGAGGCGCTTAT,GGAGGCGGTTAT,GGAGGCGTGTAT,GGAGGTGTTTAT,GGCGGCGTTTAT,GGGGGCGTTTAT	133	1,1,26,1,1,1
Lib10^3 1 ng	GGAGTGGTGGGT	GCAGTGGTGGGT,GGAGGGGTGGGT,GGAGTGGAGGGT,GGAGTGGNGGGT,GGAGTGGTGAGT,GGAGTGGTGCGT,GGAGTGGTGGGG	202	1,1,1,2,1,1,1
Lib10^3 1 ng	GGATACTTTCTA	GCATACTTTCTA,GGAAACTTTCTA,GGATACTTACTA,GGATACTTTCGA,GGCTACTTTCTA,GGTTACTTTCTA	227	1,1,1,1,1,2
Lib10^3 1 ng	GGATCATCGGGA	AGATCATCGGGA,GAATCATCGGGA,GCATCATCGGGA,GGATCATCGGCA,GGATCATCGGGG,GGATCATCGGGT	135	1,1,1,1,1,1
Lib10^3 1 ng	GGATCGCGTGCG	GGAACGCGTGCG,GGATCGAGTGCG,GGATCTCGTGCG,GGGTCGCGTGCG,GGTTCGCGTGCG	234	1,1,1,3,1
Lib10^3 1 ng	GGATTATTCTCG	GAATTATTCTCG,GCATTATTCTCG,GGACTATTCTCG,GGTTTATTCTCG	278	1,1,1,1
Lib10^3 1 ng	GGATTTGCTCGT	AGATTTGCTCGT,GAATTTGCTCGT,GGATTTGATCGT	188	1,1,1
Lib10^3 1 ng	GGCACGAGTACG	GGCACGAGGACG,GGCACGGGTACG,GGCACGTGTACG	146	1,1,3
Lib10^3 1 ng	GGCACTATTAGA	GCCACTATTAGA,GGCACAATTAGA,GGCACTATTACA,GGCACTATTAGT,GGCNCTATTAGA,GTCACTATTAGA	327	1,1,1,1,1,1
Lib10^3 1 ng	GGCATCGTGGTC	GCCATCGTGGTC	185	1
Lib10^3 1 ng	GGCCATGAGTTC	GGCCATGGGTTC,GGCCATGTGTTC	68	1,2
Lib10^3 1 ng	GGCCCGGGCTCG	GACCCGGGCTCG,GGCCCGGACTCG,GGCCCGGGCTGG	79	1,1,1
Lib10^3 1 ng	GGCCGAAATGGT	GGACGAAATGGT,GGCCGAGATGGT,GGCCNAAATGGT,GGGCGAAATGGT,GGTCGAAATGGT	150	1,1,1,1,1
Lib10^3 1 ng	GGCCTATTCCTA	GCCCTATTCCTA,GGCCTAATCCTA,GGCCTCTTCCTA	246	2,1,1
Lib10^3 1 ng	GGCCTGGACCAT	GGCCTCGACCAT,GGCCTGGACCAA,GGCCTGGTCCAT,GGGCTGGACCAT,GTCCTGGACCAT	325	1,1,11,1,1
Lib10^3 1 ng	GGCCTGTATTAT	GGCCTCTATTAT,GGCCTGTATCAT,GGCCTGTATTAA	98	1,1,1
Lib10^3 1 ng	GGCCTTATCATC	GGCCTTATCAAC	247	1
Lib10^3 1 ng	GGCGACGACCTG	GGCGACGGCCTG,GGCGACGTCCTG,GGCGGCGACCTG,GGCGTCGACCTG	118	1,6,1,1
Lib10^3 1 ng	GGCGCCCAACTT	GGCGCCCAAGTT,TGCGCCCAACTT	197	1,1
Lib10^3 1 ng	GGCGCTCACGCG	GGCGCTCACCCG,GGCGCTCACGCC	292	1,1
Lib10^3 1 ng	GGCGGATCCTAG	GGCGCATCCTAG,GGCGGCTCCTAG,GGCGGGTCCTAG,GGCGGTTCCTAG	142	2,2,12,1
Lib10^3 1 ng	GGCGGCTCGCTA	CGCGGCTCGCTA,GACGGCTCGCTA,GGCGGCCCGCTA,GGCGGCTCCCTA,GGCGGGTCGCTA	339	1,1,2,1,1
Lib10^3 1 ng	GGCTATAGGCTG	GGCTATAGGCTA	84	1
Lib10^3 1 ng	GGCTATCCGGCC	GGCTAACCGGCC,GGCTATCCGCCC,GGCTATCCGGCT,GGCTATCCGTCC	183	1,1,1,1
Lib10^3 1 ng	GGCTATGTAGCT	GCCTATGTAGCT,GGCTANGTAGCT,GGCTATGAAGCT,GGCTATGCAGCT,GGCTATGGAGCT,GGCTATGNAGCT,GGCTATGTATCT,GGCTATGTTGCT	386	1,1,1,1,1,1,1,2
Lib10^3 1 ng	GGCTGACCTTGG	GGCTGACCTAGG,GGCTGGCCTTGG,GGCTGTCCTTGG	284	1,6,7
Lib10^3 1 ng	GGCTGGATTACG	GGCAGGATTACG,GGCNGGATTACG,GGCTGGATTACT,GGCTGGTTTACG,GGTTGGATTACG,GTCTGGATTACG	388	1,1,2,1,2,1
Lib10^3 1 ng	GGCTTGAGTTTC	GGCCTGAGTTTC,GGCTTAAGTTTC,GGCTTGAGCTTC,GGCTTGAGTATC,GGCTTGGGTTTC,GGCTTGTGTTTC,GGCTTNAGTTTC,GTCTTGAGTTTC	311	1,1,1,2,2,2,1,1
Lib10^3 1 ng	GGCTTGGGCAGA	GGCATGGGCAGA,GGCTCGGGCAGA,GGCTTGGGCAGG,GGCTTGGGCAGT,GGCTTGGGCTGA	300	1,1,1,3,1
Lib10^3 1 ng	GGCTTTCGTTAG	AGCTTTCGTTAG,GGCNTTCGTTAG,GGCTTTCGTCAG,GGCTTTCGTTTG,GTCTTTCGTTAG	175	1,1,1,3,1
Lib10^3 1 ng	GGGAAGTTCAAA	GGGAACTTCAAA,GGGAAGCTCAAA,GGGAAGGTCAAA,GGGAAGTACAAA,GGGAAGTTCAAT,GGGAAGTTCATA,GGGAAGTTGAAA,GGTAAGTTCAAA	243	1,1,1,1,1,1,1,1
Lib10^3 1 ng	GGGACATTTTGT	GCGACATTTTGT,GGGACATTTTGC,GGGACATTTTGG,GGGACCTTTTGT	161	1,2,1,1
Lib10^3 1 ng	GGGACTATCATT	CGGACTATCATT,GAGACTATCATT,GGGACTATCATA,GGGGCTATCATT,GGGTCTATCATT	299	1,2,1,2,1
Lib10^3 1 ng	GGGACTCTTTGA	GGAACTCTTTGA,GGGACTCTTTGG	80	1,4
Lib10^3 1 ng	GGGAGTTAGGTT	GGCAGTTAGGTT,GGGAGGTAGGTT,GGGAGTTAGCTT,GGGAGTTAGGAT,GGGGGTTAGGTT,GGGTGTTAGGTT	219	1,1,1,1,2,2
Lib10^3 1 ng	GGGATTACCTTT	GGGATTACCATT,GGGATTACCTTG,GGGATTNCCTTT	141	1,1,1
Lib10^3 1 ng	GGGCATCGCAGG	GCGCATCGCAGG,GGGCATCCCAGG,GGGCATCGCAAG,GGGCATCGCGGG,GGGCATCGCTGG,TGGCATCGCAGG	232	1,1,1,1,2,1
Lib10^3 1 ng	GGGCTCCTGTTC	GGGCNCCTGTTC,GGGCTCCTGGTC	205	1,2
Lib10^3 1 ng	GGGCTGGTCGCT	AGGCTGGTCGCT,GAGCTGGTCGCT,GCGCTGGTCGCT,GGACTGGTCGCT,GGGATGGTCGCT,GGGCTGCTCGCT,GGGCTGGGCGCT,GGGCTGGTCGCC,GGGCTNGTCGCT,GGGGTGGTCGCT	384	2,1,2,1,1,1,1,1,1,1
Lib10^3 1 ng	GGGCTTATAGTA	GGCCTTATAGTA,GGGCTAATAGTA,GGGCTTACAGTA	234	1,1,1
Lib10^3 1 ng	GGGGAAGTATCG	AGGGAAGTATCG,GGGAAAGTATCG	105	1,1
Lib10^3 1 ng	GGGGATCACGCA	GGGGATCACCCA,GGGGATCACGCT,GGGGATCACGTA,GGGGGTCACGCA,GGGNATCACGCA,GTGGATCACGCA	275	1,1,1,1,1,1
Lib10^3 1 ng	GGGGGGCTTTAG	GGGCGGCTTTAG,GGGGGGCTATAG,GGGGGGCTTAAG,GGGGGTCTTTAG	144	1,1,1,1
Lib10^3 1 ng	GGGGTCTAATTC	GGGGACTAATTC	140	2
Lib10^3 1 ng	GGGGTTATGATT	GAGGTTATGATT,GGGGCTATGATT,GGGGTCATGATT,GGGGTNATGATT,GGGGTTATAATT,GGGGTTATCATT,GGGGTTATGAAT,GGGGTTATGTTT,GGGNTTATGATT,GGTGTTATGATT,GTGGTTATGATT	377	1,1,1,1,1,1,1,1,1,1,1
Lib10^3 1 ng	GGGGTTCCATTG	GGGGATCCATTG,GGGGGTCCATTG,GGGGTCCCATTG,GGGGTNCCATTG,GGGGTTCCATGG,GGGGTTCCATTA,GTGGTTCCATTG	280	1,3,1,1,1,1,1
Lib10^3 1 ng	GGGGTTCTACTA	GAGGTTCTACTA,GCGGTTCTACTA,GGAGTTCTACTA,GGGGGTCTACTA,GGGGTACTACTA,GGGGTGCTACTA,GGGGTNCTACTA,GGGGTTCTACCA,GGGGTTCTACTT,GTGGTTCTACTA	313	1,1,1,1,1,1,1,1,1,1
Lib10^3 1 ng	GGGGTTGGTAGT	GCGGTTGGTAGT,GGGGGTGGTAGT,GGGGTTGGGAGT,GGGGTTGGTAGA,GGGGTTGNTAGT,GTGGTTGGTAGT	290	1,1,3,1,1,1
Lib10^3 1 ng	GGGTCAGGGGTA	GAGTCAGGGGTA,GGGACAGGGGTA,GGGGCAGGGGTA,GGGTCAGGGGAA,GGGTCAGGGGGA,GGGTCTGGGGTA	290	1,1,3,1,3,1
Lib10^3 1 ng	GGGTCATTGGGG	CGGTCATTGGGG,GCGTCATTGGGG,GGCTCATTGGGG,GGGACATTGGGG,GGGTCATTGAGG,GGGTCATTGCGG,GTGTCATTGGGG	295	1,1,1,1,2,1,1
Lib10^3 1 ng	GGGTGAAGCTCG	GAGTGAAGCTCG,GGGAGAAGCTCG,GGGCGAAGCTCG,GGGGGAAGCTCG,GGGTGAAGCTTG,GGGTGAGGCTCG,GGGTGGAGCTCG,GGGTGTAGCTCG	297	1,3,1,3,1,2,2,3
Lib10^3 1 ng	GGGTGTCGTCTC	GAGTGTCGTCTC,GGATGTCGTCTC,GGGAGTCGTCTC,GGGGGTCGTCTC,GGGTGCCGTCTC,GGGTGGCGTCTC,GGGTGTCGGCTC,GGGTGTGGTCTC	216	1,2,1,2,1,1,2,1
Lib10^3 1 ng	GGGTGTGAGATG	GGGGGTGAGATG,GGGTGTGAGATT,GGGTGTGAGGTG,GGGTGTGAGTTG,GGGTGTGGGATG,GGGTGTGTGATG,TGGTGTGAGATG	308	1,1,2,3,2,1,1
Lib10^3 1 ng	GGGTTCAATAAG	GCGTTCAATAAG,GGGATCAATAAG,GGGTACAATAAG,GGGTTCAATAAA,GGGTTCAATAGG,GGGTTCAATATG,GTGTTCAATAAG	263	1,1,1,1,1,2,1
Lib10^3 1 ng	GGGTTTACTCTT	GGCTTTACTCTT,GGGATTACTCTT,GGGGTTACTCTT,GGGNTTACTCTT,GGGTTTACTCTG	250	2,2,1,1,1
Lib10^3 1 ng	GGGTTTCCCCGG	GGGGTTCCCCGG	236	2
Lib10^3 1 ng	GGTAACAAATGC	AGTAACAAATGC,GATAACAAATGC,GGGAACAAATGC,GGTAACAAAGGC,GGTAACAACTGC,GGTAACAGATGC,GGTAACNAATGC,GGTAGCAAATGC,GTTAACAAATGC	295	1,1,1,1,1,1,1,1,1
Lib10^3 1 ng	GGTAATTGGGAA	GCTAATTGGGAA,GGTAATTCGGAA,GGTAATTGCGAA,GGTAATTGGAAA,GGTAATTGGGGA,GGTAATTGGGTA,GGTAATTGGTAA,GGTAATTGTGAA,GTTAATTGGGAA	383	1,1,1,1,2,1,1,1,1
Lib10^3 1 ng	GGTACAAGTTGA	GATACAAGTTGA,GGTACAAGATGA,GGTACAAGTTGG,GGTACAAGTTGT,GGTACACGTTGA,GGTACANGTTGA	321	1,4,2,3,1,1
Lib10^3 1 ng	GGTACCATCACG		69
Lib10^3 1 ng	GGTAGCGTGGGG	GCTAGCGTGGGG,GGTAGCGAGGGG,GGTAGCGGGGGG,GGTAGCGTGCGG,GGTAGCGTGGTG,GGTAGCGTGTGG,GGTAGCNTGGGG,GGTAGGGTGGGG,GGTTGCGTGGGG	397	1,1,1,1,1,2,1,1,1
Lib10^3 1 ng	GGTAGGCATGCT	GCTAGGCATGCT,GGTAGCCATGCT,GGTAGGCATGAT	331	1,1,1
Lib10^3 1 ng	GGTATTTAATCA	GATATTTAATCA,GGTATCTAATCA,GGTATNTAATCA,GGTATTTAGTCA,GGTATTTTATCA,GTTATTTAATCA	266	1,1,1,1,1,1
Lib10^3 1 ng	GGTCAACGGCTT	GGGCAACGGCTT,GGTCAACGCCTT,GGTCAACGGGTT,GGTCTACGGCTT,GTTCAACGGCTT	372	1,1,2,1,1
Lib10^3 1 ng	GGTCCCTTCTCA	GGTCCCTCCTCA,GGTGCCTTCTCA	48	1,1
Lib10^3 1 ng	GGTCCTTCTTGT	GGTCCTCCTTGT,GTTCCTTCTTGT	25	1,1
Lib10^3 1 ng	GGTCGCGTCGTG	GGTCACGTCGTG,GGTCGCGGCGTG,GGTCGCGTCGAG,GGTCGCGTCGGG,GGTCGCGTCGTC,GGTCGGGTCGTG	209	1,1,1,1,1,1
Lib10^3 1 ng	GGTCGGCTGCTT	GGACGGCTGCTT,GGCCGGCTGCTT,GGTCGACTGCTT,GGTCGGCTGATT,GGTCGGGTGCTT,GGTCGNCTGCTT	263	1,1,1,1,1,1
Lib10^3 1 ng	GGTCTATGGGAT	GGACTATGGGAT,GGTCTAAGGGAT,GGTCTAGGGGAT,GGTCTATGGGCT,GGTCTATGGGGT,GGTCTATGGGTT,GGTCTATGGTAT	291	1,1,1,1,1,1,1
Lib10^3 1 ng	GGTCTTATGGTC	GCTCTTATGGTC,GGTATTATGGTC,GGTCTTATGCTC	234	1,1,1
Lib10^3 1 ng	GGTGAAGGGGTC	GGGGAAGGGGTC,GGTAAAGGGGTC,GGTCAAGGGGTC,GGTGAACGGGTC,GGTGAAGGGTTC,GGTGGAGGGGTC	205	1,1,1,1,1,1
Lib10^3 1 ng	GGTGAATATTGA	GGCGAATATTGA,GGTAAATATTGA,GGTGAAGATTGA,GGTGAATATAGA,GGTGAATATTGG,GGTGAATATTGT	161	1,1,1,1,3,2
Lib10^3 1 ng	GGTGAGATTTTT	GATGAGATTTTT,GGTGAGATTTAT,GGTGAGATTTGT,GGTGAGCTTTTT,GGTGGGATTTTT,GGTGTGATTTTT	309	1,1,1,1,3,3
Lib10^3 1 ng	GGTGCTCATGTT	GGTGCACATGTT,GGTGCGCATGTT,GGTGCTCATGAT,GGTGCTCATGGT,GGTGCTCATGTA,GTTGCTCATGTT	299	1,1,1,1,1,1
Lib10^3 1 ng	GGTGCTTTTATG	GGGGCTTTTATG,GGTGCTTATATG,GGTGCTTCTATG,GGTGCTTNTATG,GGTGCTTTTTTG	321	2,1,1,1,1
Lib10^3 1 ng	GGTGGACTGACG	GGTGCACTGACG,GGTGGACTGAGG,GGTGGACTGGCG,GGTGGACTGTCG,GGTGGCCTGACG,GGTGGGCTGACG,GGTGGTCTGACG	287	1,1,5,4,1,3,5
Lib10^3 1 ng	GGTGGCGTGGTT	GCTGGCGTGGTT,GGAGGCGTGGTT,GGCGGCGTGGTT,GGTGGCATGGTT,GGTGGCGCGGTT,GGTGGCGGGGTT,GGTGGCGTGGGT	363	1,1,1,1,1,1,1
Lib10^3 1 ng	GGTGGCTATCAC	GATGGCTATCAC,GCTGGCTATCAC,GGAGGCTATCAC,GGTGGATATCAC,GGTGGCTAACAC,GGTGGCTGTCAC	231	1,1,1,1,1,1
Lib10^3 1 ng	GGTGGCTCCATA	GATGGCTCCATA,GGGGGCTCCATA,GGTGGCACCATA,GGTGTCTCCATA	223	1,1,1,1
Lib10^3 1 ng	GGTGGGCTTTTG	AGTGGGCTTTTG,CGTGGGCTTTTG,GATGGGCTTTTG,GGTGGGCTCTTG,GGTGGGCTTGTG,GGTGGGCTTTCG,GGTGGTCTTTTG	325	1,1,1,1,1,3,1
Lib10^3 1 ng	GGTGGTGTGTCG	GGAGGTGTGTCG,GGTGGAGTGTCG,GGTGGTGTGACG,GGTGGTGTGCCG	131	2,1,2,1
Lib10^3 1 ng	GGTGTATTGTTA	GCTGTATTGTTA	239	1
Lib10^3 1 ng	GGTGTCGCCTCG	GGTGTTGCCTCG	225	1
Lib10^3 1 ng	GGTGTCTGTCAA	GGTGTCTGACAA,GGTGTCTGCCAA,GGTGTCTGTCAT,GGTGTCTGTGAA	242	1,1,1,1
Lib10^3 1 ng	GGTGTGTTTATT	CGTGTGTTTATT,GCTGTGTTTATT,GGTGAGTTTATT,GGTGGGTTTATT,GGTGTGTCTATT	218	1,1,1,1,1
Lib10^3 1 ng	GGTGTTGTCGAC	GCTGTTGTCGAC,GGCGTTGTCGAC,GGGGTTGTCGAC,GGTCTTGTCGAC,GGTGGTGTCGAC,GGTGTGGTCGAC,GGTGTTGACGAC,GGTGTTGGCGAC,GGTGTTGTCCAC,GGTGTTGTCGAA,GGTGTTGTCGCC,GGTGTTGTCGGC,GGTGTTGTCGTC	321	1,1,1,1,1,2,2,1,2,1,1,1,2
Lib10^3 1 ng	GGTTACTTCGGA	GATTACTTCGGA,GGTTACTTCGGC,GGTTACTTCGGG,GGTTACTTCGGT	256	1,1,1,2
Lib10^3 1 ng	GGTTAGTGTTGT	CGTTAGTGTTGT,GGGTAGTGTTGT,GGTTAATGTTGT,GGTTAGNGTTGT,GGTTAGTGTTGG	237	2,2,1,1,1
Lib10^3 1 ng	GGTTATGTCAGG	GGATATGTCAGG,GGTTATGTCTGG	211	1,2
Lib10^3 1 ng	GGTTCCTTATGC	GGATCCTTATGC,GGTACCTTATGC,GGTTCCGTATGC,GGTTCCTTATGG	204	1,1,1,1
Lib10^3 1 ng	GGTTCGGTGATG	GATTCGGTGATG,GGATCGGTGATG,GGGTCGGTGATG,GGTACGGTGATG,GGTCCGGTGATG,GGTNCGGTGATG,GGTTCGGTGGTG	317	1,1,1,1,1,1,11
Lib10^3 1 ng	GGTTGGAGGGCA	GGGTGGAGGGCA,GGTAGGAGGGCA,GGTCGGAGGGCA,GGTTGAAGGGCA,GGTTGCAGGGCA,GGTTGGAGGCCA,GGTTGGAGGTCA,GGTTGGGGGGCA,GGTTGGNGGGCA,GGTTGGTGGGCA	330	1,1,1,1,1,2,1,5,1,2
Lib10^3 1 ng	GGTTGGCAGCTC	GGATGGCAGCTC,GGTAGGCAGCTC,GGTTCGCAGCTC,GGTTGGCAGATC,GGTTGGCAGCAC,GGTTGGCAGCTG,GGTTGGCTGCTC	264	2,1,1,1,1,1,2
Lib10^3 1 ng	GGTTGGTTTCGA	GGGTGGTTTCGA,GGTCGGTTTCGA,GGTTAGTTTCGA,GGTTGGTTACGA,GGTTGGTTTCAA,GGTTGGTTTCGG,GGTTGGTTTCGT	297	1,1,1,1,1,1,6
Lib10^3 1 ng	GGTTGTCAAGTT	AGTTGTCAAGTT,GGTGGTCAAGTT,GGTTGACAAGTT,GGTTGCCAAGTT,GGTTGGCAAGTT,GGTTGTCAAATT,GGTTGTCAAGGT	328	1,1,2,1,1,1,1
Lib10^3 1 ng	GGTTGTTTGTTG	GGTGGTTTGTTG,GGTTGTTTGATG	115	1,1
Lib10^3 1 ng	GGTTGTTTTGGT	GGGTGTTTTGGT,GGTAGTTTTGGT,GGTTGGTTTGGT,GGTTGTNTTGGT,GGTTGTTTGGGT	172	1,1,1,1,1
Lib10^3 1 ng	GGTTTCTGCCAT	GGTNTCTGCCAT,GGTTTCTGCAAT,GGTTTCTGCCAA	170	1,1,1
Lib10^3 1 ng	GGTTTTCTTTGC	CGTTTTCTTTGC,GATTTTCTTTGC,GGTGTTCTTTGC,GGTTTGCTTTGC	270	1,1,1,1
Lib10^3 1 ng	GGTTTTGATCGC	GGTTATGATCGC,GGTTGTGATCGC,GGTTTGGATCGC,GGTTTTGATCCC,GGTTTTGGTCGC,GGTTTTGTTCGC	273	1,1,2,1,1,3
Lib10^3 1 ng	GGTTTTGGGTTG	GGATTTGGGTTG,GGTNTTGGGTTG,GGTTTTGGGATG,GGTTTTGGGCTG	337	1,1,2,1
Lib10^3 1 ng	GTAAAGGCGGGA	GTAAAGGCGGGG,GTAAATGCGGGA,GTAATGGCGGGA	226	1,1,1
Lib10^3 1 ng	GTAACGTATAAG	GTAACGAATAAG,GTAACGTATAAA,GTAACGTATATG,GTAACGTATTAG,GTAACNTATAAG,GTTACGTATAAG	324	1,1,2,1,1,1
Lib10^3 1 ng	GTAATGTCTGCA	GTAAAGTCTGCA	86	1
Lib10^3 1 ng	GTAATTTATCTC	GTAATTGATCTC	164	1
Lib10^3 1 ng	GTAATTTGAAAT	GTAATTTGGAAT,GTAGTTTGAAAT	205	3,1
Lib10^3 1 ng	GTACACCACACT	GAACACCACACT,GTCCACCACACT,GTTCACCACACT	240	2,1,1
Lib10^3 1 ng	GTACACGCTACC	GGACACGCTACC,GTACACGCTAGC,GTACACGNTACC	231	2,1,1
Lib10^3 1 ng	GTACATACGTGT	GAACATACGTGT,GTACAAACGTGT,GTACATANGTGT	110	1,1,1
Lib10^3 1 ng	GTACCTCCGATG	CTACCTCCGATG,GTACCTCCGATT,GTACCTCCGCTG,GTACCTCCGGTG,GTACCTCCGTTG,GTACCTCCTATG,GTACCTNCGATG,GTACNTCCGATG	209	1,1,6,2,8,1,1,1
Lib10^3 1 ng	GTACGGTCGGTC	GAACGGTCGGTC,GTACGGTCGGAC,GTACGTTCGGTC,GTANGGTCGGTC	147	1,1,1,1
Lib10^3 1 ng	GTACGGTCTCCC	GAACGGTCTCCC,GCACGGTCTCCC,GGACGGTCTCCC,GTACGATCTCCC,GTACGGACTCCC,GTACGGTCTGCC,GTGCGGTCTCCC	311	1,1,1,1,1,1,1
Lib10^3 1 ng	GTACTGAAGCGC	GAACTGAAGCGC,GGACTGAAGCGC,GTACTGAAGTGC,GTACTGAGGCGC,GTACTGATGCGC,GTACTGCAGCGC,GTACTGGAGCGC,GTACTGTAGCGC	348	1,1,2,1,1,1,6,3
Lib10^3 1 ng	GTACTGGTAGTT	GAACTGGTAGTT,GTACGGGTAGTT,GTACTGCTAGTT,GTACTGGAAGTT,GTACTGGNAGTT,GTACTGGTAATT,GTACTGGTAGAT,GTACTGGTAGGT,GTACTGGTTGTT,GTCCTGGTAGTT	276	1,1,1,1,1,1,1,3,1,1
Lib10^3 1 ng	GTAGAGCCGTCT	GGAGAGCCGTCT,GTAGAGCCGGCT,GTAGAGCCGTCA,GTAGAGCCGTGT,GTAGAGCTGTCT,GTAGCGCCGTCT,GTAGGGCCGTCT,GTAGTGCCGTCT,GTANAGCCGTCT,TTAGAGCCGTCT	315	1,1,1,1,1,1,4,10,1,1
Lib10^3 1 ng	GTAGCGTTTTTT	GTAGCCTTTTTT,GTAGCGTATTTT,GTAGCGTCTTTT,GTAGCGTGTTTT,GTAGCGTTTTAT,GTAGCGTTTTTC	155	1,5,2,2,2,1
Lib10^3 1 ng	GTAGGGCGAACG	GTAGAGCGAACG,GTAGGACGAACG,GTAGGCCGAACG,GTAGGGCGGACG,GTAGGGCGTACG,GTTGGGCGAACG	283	1,2,1,1,1,1
Lib10^3 1 ng	GTAGGGTTACGC	GTACGGTTACGC,GTAGGGGTACGC,GTAGGGTTAGGC,GTAGGGTTATGC,GTAGGNTTACGC,GTAGTGTTACGC,GTTGGGTTACGC	334	1,1,1,1,1,1,1
Lib10^3 1 ng	GTAGGTGTAAGA	ATAGGTGTAAGA,GAAGGTGTAAGA,GTAAGTGTAAGA,GTACGTGTAAGA,GTAGGAGTAAGA,GTAGGCGTAAGA,GTAGGNGTAAGA,GTAGGTGTAAGG,GTAGGTGTAAGT,GTAGGTGTATGA,GTAGGTGTTAGA	360	1,1,1,1,1,1,1,2,2,1,1
Lib10^3 1 ng	GTAGTATTGCCG	GTAGAATTGCCG,GTAGCATTGCCG,GTAGGATTGCCG,GTAGTANTGCCG,GTAGTATTGCTG	184	1,1,1,1,2
Lib10^3 1 ng	GTAGTGACTGGC	GGAGTGACTGGC,GTAGAGACTGGC,GTAGTGACTCGC,GTAGTGACTGCC,GTAGTGGCTGGC,GTAGTGTCTGGC,GTCGTGACTGGC	278	1,2,1,2,2,2,1
Lib10^3 1 ng	GTAGTGATAAGC	GTAGTAATAAGC,GTAGTGATAAAC,GTAGTGATAGGC,GTAGTGATTAGC	176	1,1,1,1
Lib10^3 1 ng	GTATGTGGTAGC	GTATGGGGTAGC,GTATGTGGAAGC,GTATGTGGGAGC	249	1,1,1
Lib10^3 1 ng	GTATTACCGTGC	GTATTACCGTGG,GTATTACCGTGT,GTATTACGGTGC,GTATTAGCGTGC	215	1,1,1,1
Lib10^3 1 ng	GTATTCGCAGTA	ATATTCGCAGTA,GTATCCGCAGTA,GTATTCGCAGGA,GTATTCGNAGTA	281	1,2,1,1
Lib10^3 1 ng	GTATTCGGGTTT		38
Lib10^3 1 ng	GTATTTTTGAAG	GAATTTTTGAAG,GTATTTTCGAAG,GTATTTTTGAGG,GTATTTTTGGAG,GTATTTTTGTAG,TTATTTTTGAAG	228	1,1,2,2,8,1
Lib10^3 1 ng	GTCAAGGTCCTG	GACAAGGTCCTG,GTCAAGGGCCTG,GTCAAGGTCATG,GTCATGGTCCTG,TTCAAGGTCCTG	214	1,1,1,2,1
Lib10^3 1 ng	GTCACTGCCCGG	GTCACCGCCCGG,GTCACTGCCCAG,GTCACTGCCCGT,GTCCCTGCCCGG	212	1,1,2,1
Lib10^3 1 ng	GTCAGCATTATG	GCCAGCATTATG,GTCAGGATTATG,GTCTGCATTATG	52	1,1,1
Lib10^3 1 ng	GTCAGTAGGAAT	GACAGTAGGAAT,GTCAGTAGGAAA,GTCAGTAGGAAG,GTCAGTAGGCAT,GTCAGTAGGGAT,GTCAGTTGGAAT,GTCTGTAGGAAT,GTTAGTAGGAAT	327	1,1,1,1,1,1,1,1
Lib10^3 1 ng	GTCATAGAGTTT	GTCATAGCGTTT,GTCATAGGGTTT,GTCATAGTGTTT,GTCATCGAGTTT	216	1,1,3,1
Lib10^3 1 ng	GTCATATCCGTG	GACATATCCGTG,GTCATACCCGTG,GTCATATCCCTG,GTCATATCCGGG,GTCATCTCCGTG	225	1,1,1,1,1
Lib10^3 1 ng	GTCATCCAGCCG	GACATCCAGCCG,GTCATCCCGCCG	264	1,3
Lib10^3 1 ng	GTCATCGAGAGC	GGCATCGAGAGC,GTCATCGAGGGC,GTCATCGAGTGC,GTCATCGGGAGC,GTCATCGTGAGC	192	1,1,1,4,2
Lib10^3 1 ng	GTCATTAGATAC	GTCAATAGATAC,GTCATCAGATAC,GTCATTAAATAC,GTCATTAGAGAC,GTCATTAGGTAC,GTCATTAGTTAC,GTCATTGGATAC	325	1,1,1,1,2,3,1
Lib10^3 1 ng	GTCCCGAACTTG	GGCCCGAACTTG,GTCCCCAACTTG,GTCCCGAAGTTG,GTCCCGANCTTG,GTCCCGCACTTG,GTCCCGGACTTG,GTCCCGTACTTG	253	1,1,1,1,1,3,1
Lib10^3 1 ng	GTCCGTTCGTTT	GTCCGTTCGATT,GTCCTTTCGTTT,GTCGGTTCGTTT	40	1,1,1
Lib10^3 1 ng	GTCCTCTGGCCT	GTCCTCTGGACT,GTCCTCTGGGCT,GTCCTCTGGTCT,GTCCTTTGGCCT,GTCNTCTGGCCT	205	1,1,1,1,1
Lib10^3 1 ng	GTCCTGCCTAGT	GACCTGCCTAGT,GTCATGCCTAGT,GTCCTGCTTAGT,GTGCTGCCTAGT	285	2,1,1,1
Lib10^3 1 ng	GTCCTGGTCACG	GACCTGGTCACG,GTCCTGGTCATG,GTCCTGGTCTCG	211	1,1,1
Lib10^3 1 ng	GTCCTTCTGGGT	GACCTTCTGGGT,GTCCTTCTGGGA	109	2,1
Lib10^3 1 ng	GTCGCACTGCGG		333
Lib10^3 1 ng	GTCGCCGCGTCG		208
Lib10^3 1 ng	GTCGCTGGTTAG	GTCGCTGGGTAG,GTCGCTGGTTGG,GTCGCTGNTTAG,GTCGTTGGTTAG	69	1,1,1,1
Lib10^3 1 ng	GTCGGGCAGGAT	GTCGGGCAGGGT,GTCGGGNAGGAT	300	1,1
Lib10^3 1 ng	GTCGGTTCTTAG	GACGGTTCTTAG,GTCAGTTCTTAG,GTCGCTTCTTAG,GTCGGATCTTAG,GTCGGCTCTTAG,GTCGGGTCTTAG,GTCGGTCCTTAG,GTCGGTTCTTTG	319	1,1,1,2,1,1,1,3
Lib10^3 1 ng	GTCGTAGCCGTT	GGCGTAGCCGTT,GTCGTAGCCGTA,GTCGTTGCCGTT	110	1,1,1
Lib10^3 1 ng	GTCGTCGTCTAG		128
Lib10^3 1 ng	GTCTACGCTGGT	GTCTACGCAGGT,GTCTACGCTGGC,GTCTACGCTGGG,GTCTACGCTGTT,GTCTACGNTGGT	288	1,1,1,1,1
Lib10^3 1 ng	GTCTAGTACGTA	GTCNAGTACGTA	76	1
Lib10^3 1 ng	GTCTCGAAGGGT	GACTCGAAGGGT,GCCTCGAAGGGT,GTCTCGAAGAGT,GTCTCGAAGGGA,GTCTCGAAGTGT,GTCTCGATGGGT,GTCTCGCAGGGT,GTCTCGTAGGGT,GTCTCNAAGGGT	240	1,1,1,1,1,1,2,1,1
Lib10^3 1 ng	GTCTGGCTCCCA	GTCTGGCTACCA,GTCTGGCTCCCT,GTCTGGCTCCTA	188	1,1,1
Lib10^3 1 ng	GTCTTAATGTCT	GTCTTAACGTCT,GTCTTAATGGCT	304	1,1
Lib10^3 1 ng	GTCTTACTTTTT	GTATTACTTTTT,GTCTTACNTTTT,GTCTTACTTATT,GTCTTACTTTCT	217	1,1,1,1
Lib10^3 1 ng	GTCTTATTTAGC	ATCTTATTTAGC,GACTTATTTAGC,GTCTTTTTTAGC	167	1,1,1
Lib10^3 1 ng	GTCTTCACTTAT	GACTTCACTTAT,GTCTTCACTTAA,GTCTTCGCTTAT,GTCTTTACTTAT	204	1,1,1,1
Lib10^3 1 ng	GTCTTTAAGCGC	GTCTTTATGCGC,GTCTTTCAGCGC	243	2,1
Lib10^3 1 ng	GTCTTTAGTCGT	GTCTTNAGTCGT,GTCTTTAGTCGA,GTCTTTAGTCGC	188	1,1,1
Lib10^3 1 ng	GTGAAAAATATC	GTGAAAAAAATC,GTGAAAAAGATC,GTGAAAAATGTC,GTGTAAAATATC	200	1,1,1,1
Lib10^3 1 ng	GTGAAAGGTTTT	ATGAAAGGTTTT,GTGAAAGGGTTT,GTGAAAGGTATT,GTGAANGGTTTT,GTGGAAGGTTTT	216	1,1,1,1,1
Lib10^3 1 ng	GTGAGCGGTTGG	GAGAGCGGTTGG,GTGAGCCGTTGG,GTGAGCGCTTGG,GTGAGCGGATGG,GTGAGCGGCTGG,GTGAGCGGGTGG,GTGAGCGGTAGG,GTGAGCGGTTGC,GTGGGCGGTTGG,GTGTGCGGTTGG	186	1,1,1,2,1,5,1,1,2,1
Lib10^3 1 ng	GTGATGGATCGT	GAGATGGATCGT,GGGATGGATCGT,GTGATGGAACGT,GTGATGGATCGA,GTGATGGATTGT,GTGATGGTTCGT,GTGGTGGATCGT,GTGNTGGATCGT	249	1,2,1,1,1,2,1,1
Lib10^3 1 ng	GTGATGGGCTTC	GTGATGAGCTTC,GTGATGGACTTC,GTGATGGGCTTG,GTGGTGGGCTTC,GTGTTGGGCTTC	177	1,1,1,1,2
Lib10^3 1 ng	GTGATTTTTGAT		20
Lib10^3 1 ng	GTGCATTTCCGT		21
Lib10^3 1 ng	GTGCCCGGCGAA		122
Lib10^3 1 ng	GTGCCTTTGTTT	GAGCCTTTGTTT,GGGCCTTTGTTT,GTGCCNTTGTTT,GTGCCTTTGTTC,GTGGCTTTGTTT,GTGTCTTTGTTT,TTGCCTTTGTTT	220	1,1,1,1,1,1,1
Lib10^3 1 ng	GTGCGTGGGTTC	GAGCGTGGGTTC,GGGCGTGGGTTC,GTGCGTGGGATC,GTGCGTGGGGTC,GTGCGTGGTTTC,GTGCGTGTGTTC,GTTCGTGGGTTC	259	1,1,1,1,1,1,1
Lib10^3 1 ng	GTGCGTTGTGAG	GTACGTTGTGAG,GTGCGTTGTGGG,GTGCGTTGTGTG	68	1,10,2
Lib10^3 1 ng	GTGCTCAGCATT	GAGCTCAGCATT,GGGCTCAGCATT	265	2,1
Lib10^3 1 ng	GTGCTGATGCGT	GGGCTGATGCGT,GTGCTGATGCGG,GTGCTGGTGCGT,GTGCTGTTGCGT	251	1,1,6,1
Lib10^3 1 ng	GTGCTTGATGGC	GCGCTTGATGGC,GTGCTTGATCGC,GTGCTTGATGGT,GTGCTTGTTGGC	188	1,1,1,2
Lib10^3 1 ng	GTGGACGTGCGC	GAGGACGTGCGC,GTGCACGTGCGC,GTGGAAGTGCGC,GTGGACGGGCGC,GTGGAGGTGCGC,GTGGGCGTGCGC,GTGGTCGTGCGC	287	1,1,1,1,1,1,4
Lib10^3 1 ng	GTGGCATGCGAT	GGGGCATGCGAT,GTGGCACGCGAT,GTGGCATGCGAA,GTGGCATGCGTT,GTGGCATGCTAT	184	1,1,1,1,1
Lib10^3 1 ng	GTGGGAAAGAGT	GCGGGAAAGAGT,GTGGCAAAGAGT,GTGGGAAAGAGC,GTGGGAAAGAGG,GTGGGAAAGGGT,GTGGGAAAGTGT,GTGGGAANGAGT	220	1,1,1,1,2,1,1
Lib10^3 1 ng	GTGGGAGCAATG	ATGGGAGCAATG,GTGGGACCAATG,GTGGGAGCAAAG,GTGGGGGCAATG,GTGGGTGCAATG	343	1,1,1,3,2
Lib10^3 1 ng	GTGGGTCTTACT	GCGGGTCTTACT,GGGGGTCTTACT,GNGGGTCTTACT,GTGGGNCTTACT,GTGGGTCNTACT	206	1,1,1,1,1
Lib10^3 1 ng	GTGGTAACTGAG	GGGGTAACTGAG,GTGGCAACTGAG,GTGGTAACGGAG,GTGGTAACTCAG,GTGGTAACTGCG,GTGGTAACTGGG,GTGGTAACTGTG	292	1,1,1,1,1,17,19
Lib10^3 1 ng	GTGGTAGCTTTA	GTGGTAGCTTAA,GTGGTAGGTTTA,GTGGTAGTTTTA	150	1,1,1
Lib10^3 1 ng	GTGGTCTGCTTC	GTGGGCTGCTTC,GTGGTCNGCTTC,GTGGTCTGCTAC	276	1,1,1
Lib10^3 1 ng	GTGGTGATTTTA	GAGGTGATTTTA,GCGGTGATTTTA,GTGGTGTTTTTA	253	2,1,2
Lib10^3 1 ng	GTGGTTTGGATC	GTGGTGTGGATC,GTGGTTCGGATC,GTGGTTTGGGTC,GTGGTTTGGTTC,GTGGTTTTGATC	278	1,1,1,1,2
Lib10^3 1 ng	GTGTACACCGTC	GTGTACACCATC,GTGTACACCGAC,GTGTACACCGCC,GTGTACACCGTT,GTGTACANCGTC	300	1,1,1,1,1
Lib10^3 1 ng	GTGTAGATGGTT	GTGTAGATGATT,GTGTAGATGGAT,GTGTAGATGGGT,GTGTAGGTGGTT,GTGTAGTTGGTT	269	1,1,1,2,1
Lib10^3 1 ng	GTGTCCGCATGT	GAGTCCGCATGT,GCGTCCGCATGT,GTGTCCGAATGT,GTGTCCGCATGG	300	1,1,1,2
Lib10^3 1 ng	GTGTCTTTCCTG	CTGTCTTTCCTG,GTGTCTTGCCTG,GTGTCTTTCCTC	304	1,1,1
Lib10^3 1 ng	GTGTGAGTTTGG	GGGTGAGTTTGG,GTGGGAGTTTGG,GTGTGAGGTTGG,GTGTGAGTTTCG,GTGTGGGTTTGG,GTGTGTGTTTGG	205	1,1,1,2,1,1
Lib10^3 1 ng	GTGTGCACGGAC	GTGAGCACGGAC,GTGTGCACGCAC,GTGTGCACGGAG	155	1,1,1
Lib10^3 1 ng	GTGTGGCTTTTT	GTGNGGCTTTTT,GTGTGACTTTTT,GTGTGGCTTGTT,GTGTGGCTTTGT	182	1,2,1,1
Lib10^3 1 ng	GTGTGGGAATGG	GTGTCGGAATGG,GTGTGAGAATGG,GTGTGGAAATGG,GTGTGGGAGTGG,GTGTGGGCATGG,GTGTGGGGATGG,GTGTGGNAATGG	216	1,1,1,1,1,1,1
Lib10^3 1 ng	GTGTGTGGACGT	GAGTGTGGACGT,GTGGGTGGACGT,GTGTGGGGACGT,GTGTGTGGACGA,GTGTGTGGACGG,GTGTGTGGGCGT,GTGTGTGGTCGT,GTGTGTGNACGT,GTGTGTNGACGT	309	1,1,1,1,1,3,4,1,1
Lib10^3 1 ng	GTGTTCCTTTGC	CTGTTCCTTTGC,GCGTTCCTTTGC,GTGGTCCTTTGC,GTGTTACTTTGC	201	1,1,1,1
Lib10^3 1 ng	GTGTTCGTGATC	GGGTTCGTGATC,GTATTCGTGATC,GTGTTCGGGATC,GTGTTCGTGGTC,GTGTTCGTGTTC,GTGTTGGTGATC,GTGTTTGTGATC	364	1,1,1,1,2,1,1
Lib10^3 1 ng	GTTAAGTGCCCC	GTTAAGCGCCCC,GTTAAGGGCCCC,GTTAANTGCCCC,GTTAATTGCCCC,GTTATGTGCCCC	229	1,1,1,1,1
Lib10^3 1 ng	GTTAATGGTATA	GTTAAAGGTATA,GTTAATGATATA,GTTAATGCTATA,GTTAATGGAATA,GTTAATGGGATA,GTTACTGGTATA,GTTAGTGGTATA	233	1,1,1,1,1,1,1
Lib10^3 1 ng	GTTAATTCATCA	GTTAACTCATCA	245	1
Lib10^3 1 ng	GTTATACCTCCG	GTTATACCTCCC,GTTATGCCTCCG,GTTATTCCTCCG,GTTTTACCTCCG	200	1,1,1,1
Lib10^3 1 ng	GTTATTCGTTAT	GTAATTCGTTAT,GTTATCCGTTAT,GTTATNCGTTAT,GTTATTCGGTAT	275	1,1,1,1
Lib10^3 1 ng	GTTCCGGCTCGG	GATCCGGCTCGG,GGTCCGGCTCGG,GTCCCGGCTCGG,GTGCCGGCTCGG,GTTCCCGCTCGG,GTTCCGCCTCGG,GTTCCGGCTAGG,GTTCCGGCTCGA,GTTCCGGCTTGG,GTTCCGNCTCGG,GTTCCNGCTCGG	428	1,1,1,1,1,1,2,1,1,1,1
Lib10^3 1 ng	GTTCGGACTGTT	GTCCGGACTGTT,GTTCGGACTATT,GTTCGGACTGTG,GTTCGGAGTGTT,GTTCGGGCTGTT,GTTCGGNCTGTT,GTTCTGACTGTT	297	1,1,1,1,2,1,1
Lib10^3 1 ng	GTTCGTATCATG	GTTCGGATCATG,GTTCGTACCATG,GTTCGTATCACG,GTTCGTNTCATG	258	1,1,1,1
Lib10^3 1 ng	GTTCGTGCCTCC	GGTCGTGCCTCC,GTTCGAGCCTCC,GTTCGGGCCTCC,GTTCGTGTCTCC	288	3,1,1,2
Lib10^3 1 ng	GTTCTAGTCTTG	GTACTAGTCTTG,GTTCTAGGCTTG	238	1,1
Lib10^3 1 ng	GTTCTGCTTTCA	GTTCGGCTTTCA,GTTCTGCCTTCA,GTTCTGCTTTCC,GTTCTGCTTTCT	131	1,1,1,1
Lib10^3 1 ng	GTTCTTATATTA	GATCTTATATTA,GGTCTTATATTA,GTTCTAATATTA,GTTCTTATAGTA,GTTCTTATTTTA	288	1,1,1,1,1
Lib10^3 1 ng	GTTCTTGTCCTA	GGTCTTGTCCTA,GTGCTTGTCCTA,GTTCTTGACCTA,GTTCTTGGCCTA,GTTCTTGTCTTA,GTTTTTGTCCTA	193	1,1,1,1,1,1
Lib10^3 1 ng	GTTGACGAGCGG	GTTGACGGGCGG,GTTGACGTGCGG,GTTGACNAGCGG,GTTGGCGAGCGG,GTTGTCGAGCGG	97	1,3,1,2,3
Lib10^3 1 ng	GTTGACGGAATC	GTTGACGGAGTC,GTTGACGGATTC,GTTGACGGGATC,GTTGCCGGAATC,GTTGGCGGAATC,GTTGTCGGAATC	220	1,1,2,1,2,5
Lib10^3 1 ng	GTTGAGGCCAAT	GTGGAGGCCAAT,GTTGAGACCAAT,GTTGAGGGCAAT,GTTGAGGNCAAT,GTTGCGGCCAAT,GTTGGGGCCAAT,GTTGTGGCCAAT	283	1,1,1,1,1,5,9
Lib10^3 1 ng	GTTGAGTGTTAG	GATGAGTGTTAG,GGTGAGTGTTAG,GTTGAGTATTAG,GTTGAGTGATAG	240	2,1,1,1
Lib10^3 1 ng	GTTGCCAGGCTA	GTGGCCAGGCTA,GTTGCCAGGNTA,GTTGCCTGGCTA,GTTGCGAGGCTA,GTTGCTAGGCTA,GTTNCCAGGCTA	369	1,1,1,1,1,1
Lib10^3 1 ng	GTTGCCCCGGGG	GGTGCCCCGGGG,GTCGCCCCGGGG,GTTGCCCCGGGA,GTTGCNCCGGGG,GTTGTCCCGGGG	243	1,1,1,1,1
Lib10^3 1 ng	GTTGCGGAAGGT	GATGCGGAAGGT,GTTGCGCAAGGT,GTTGCGGAAAGT,GTTGCGGAAGGA,GTTGCGGATGGT,GTTGCGGTAGGT	367	2,1,1,1,1,1
Lib10^3 1 ng	GTTGCTATCTGT	CTTGCTATCTGT,GTTCCTATCTGT,GTTGCAATCTGT,GTTGCCATCTGT,GTTGCTATCAGT,GTTGCTATCTCT,GTTGCTATCTGA,GTTGCTATCTGC,GTTGCTATCTGG	287	2,1,4,1,1,1,1,1,1
Lib10^3 1 ng	GTTGCTTTCCAT	GATGCTTTCCAT,GTTGCGTTCCAT,GTTGCTTTCTAT	250	1,1,1
Lib10^3 1 ng	GTTGGCTCTGTA	GTTCGCTCTGTA,GTTGGCTCTATA,GTTGGCTCTGTT	336	1,1,1
Lib10^3 1 ng	GTTGGGTGTTAT	GGTGGGTGTTAT,GTTGGGAGTTAT,GTTGGGTGTTAA,GTTGGGTGTTGT	240	2,1,1,189
Lib10^3 1 ng	GTTGGGTTGTAA	GTAGGGTTGTAA,GTTGGGNTGTAA,GTTGGGTTGGAA	232	1,1,1
Lib10^3 1 ng	GTTGGTAGTGCG	GATGGTAGTGCG,GGTGGTAGTGCG,GTTGATAGTGCG,GTTGCTAGTGCG,GTTGGGAGTGCG,GTTGGTAGCGCG,GTTGGTTGTGCG,GTTGNTAGTGCG	258	1,1,1,1,1,1,3,1
Lib10^3 1 ng	GTTGGTTGGGAT	GTTCGTTGGGAT,GTTGGATGGGAT,GTTGGGTGGGAT,GTTGGTGGGGAT,GTTGGTNGGGAT,GTTGGTTGGGGT,GTTGGTTGGGTT,GTTGGTTGTGAT,GTTGGTTNGGAT,GTTGGTTTGGAT	397	1,2,1,1,1,4,1,1,1,1
Lib10^3 1 ng	GTTGTATTTCTT	GATGTATTTCTT,GTGGTATTTCTT,GTTGCATTTCTT,GTTGGATTTCTT,GTTGTATTTTTT,GTTGTCTTTCTT,GTTGTNTTTCTT	228	1,1,1,1,1,1,2
Lib10^3 1 ng	GTTGTGTATTAT	GATGTGTATTAT,GTTGTATATTAT	110	2,1
Lib10^3 1 ng	GTTTAACATAGG	GCTTAACATAGG,GGTTAACATAGG,GTATAACATAGG,GTTTAACATAGA,GTTTAACATCGG,GTTTTACATAGG	453	1,1,2,1,1,1
Lib10^3 1 ng	GTTTAATGTTGC	GTTTAATGATGC,GTTTAATGGTGC	163	1,1
Lib10^3 1 ng	GTTTACGCAGCT	GATTACGCAGCT,GCTTACGCAGCT	247	1,1
Lib10^3 1 ng	GTTTCCTTGCAG	GTTTCCTTGCCG,GTTTCCTTGCGG,GTTTCCTTGCTG,GTTTCTTTGCAG	218	1,1,4,1
Lib10^3 1 ng	GTTTCTACTATC	CTTTCTACTATC,GCTTCTACTATC,GTATCTACTATC,GTCTCTACTATC,GTTTTTACTATC	202	1,1,1,1,1
Lib10^3 1 ng	GTTTGAGCTTTC	GGTTGAGCTTTC,GTTTGGGCTTTC,GTTTGTGCTTTC	145	1,7,5
Lib10^3 1 ng	GTTTGCCGTGAT	GATTGCCGTGAT,GGTTGCCGTGAT,GTTTGCCGGGAT,GTTTGCCGTGCT,GTTTGCCGTGGT,GTTTGCCNTGAT,GTTTGCTGTGAT	257	2,1,1,1,1,1,1
Lib10^3 1 ng	GTTTGGTTTATT	GTTTGGATTATT	29	1
Lib10^3 1 ng	GTTTTGACTTGC	GTTCTGACTTGC,GTTTTGACTCGC,GTTTTGACTTGG,GTTTTGGCTTGC,GTTTTGTCTTGC	264	1,1,1,2,5
Lib10^3 1 ng	GTTTTGATTATA	GATTTGATTATA,GTGTTGATTATA,GTTATGATTATA,GTTGTGATTATA,GTTTTGGTTATA,GTTTTGTTTATA	195	1,1,1,1,2,2
Lib10^3 1 ng	GTTTTTACATGT	GGTTTTACATGT,GTTTTTACAAGT,GTTTTTACATGG	174	1,1,1
Lib10^3 1 ng	GTTTTTTTCGCT	GATTTTTTCGCT,GTTTTATTCGCT,GTTTTTTTCACT	202	1,1,1
Lib10^3 1 ng	TAAAATAGAAAA	CAAAATAGAAAA,TAAAATAAAAAA,TAAAATAGAAAG,TAAAATAGAGAA,TAAAATAGTAAA	243	1,1,1,1,1
Lib10^3 1 ng	TAAAGGGGGTTA	CAAAGGGGGTTA,TAAAGCGGGTTA,TAAAGGGGGATA,TAAAGGGGGCTA,TAAAGGGNGTTA,TAAGGGGGGTTA	268	1,2,2,1,1,1
Lib10^3 1 ng	TAAAGTGGTGAT	TAAAGAGGTGAT,TAAAGGGGTGAT,TAAAGTGGGGAT,TAAAGTGGTGAG,TAAAGTNGTGAT,TAATGTGGTGAT	242	1,1,1,1,1,1
Lib10^3 1 ng	TAAATCTCGTTT	AAAATCTCGTTT,TAAATCTCGCTT,TAAATCTCGTAT,TTAATCTCGTTT	267	1,1,1,1
Lib10^3 1 ng	TAACCGGTGATG	AAACCGGTGATG,TAACCGGAGATG,TAACCGGTGCTG,TAACCGGTGGTG,TAACCGGTGTTG,TAACCNGTGATG,TTACCGGTGATG	255	1,1,1,6,7,1,1
Lib10^3 1 ng	TAACGAGTTGGC	AAACGAGTTGGC,GAACGAGTTGGC,TAACGACTTGGC,TAACGAGATGGC,TAACGGGTTGGC,TGACGAGTTGGC	132	1,1,1,1,1,1
Lib10^3 1 ng	TAAGATGCTGAG	TAAGATGCGGAG,TAAGATGCTAAG,TAAGATGCTGGG,TAAGATGCTGTG,TAAGATGNTGAG,TAAGGTGCTGAG,TAANATGCTGAG,TATGATGCTGAG	299	1,1,19,12,1,1,1,2
Lib10^3 1 ng	TAAGCTCCACGC	TAACCTCCACGC	284	1
Lib10^3 1 ng	TAAGGACGGGTT	TAAGGACAGGTT,TAAGGACGGCTT,TAAGGACGGGAT,TAAGGACGGGGT,TAAGGCCGGGTT,TAAGGTCGGGTT,TACGGACGGGTT	264	1,1,1,2,1,3,1
Lib10^3 1 ng	TAAGGTGTCTCT	TAAGGNGTCTCT	163	1
Lib10^3 1 ng	TAATCGCCGTGT	TAATCCCCGTGT,TAATCGCCGAGT,TAATCGCNGTGT,TAGTCGCCGTGT	137	1,1,1,1
Lib10^3 1 ng	TAATCTAGTTTA	TAANCTAGTTTA,TAATCTAGCTTA,TAATCTAGTATA,TAATCTAGTCTA	228	1,1,1,1
Lib10^3 1 ng	TAATTGTATACA	TAATTGCATACA,TAATTGGATACA,TAATTGTTTACA,TAATTTTATACA,TACTTGTATACA,TTATTGTATACA	244	1,1,1,1,1,1
Lib10^3 1 ng	TAATTTACCGTC	TAATTTACCCTC,TATTTTACCGTC	237	1,1
Lib10^3 1 ng	TACAGGTGGCGG	TACAGCTGGCGG,TACAGGTGGGGG,TACAGGTGGTGG	174	2,1,1
Lib10^3 1 ng	TACATTATCACG	TAAATTATCACG,TACATTATCACA	212	1,1
Lib10^3 1 ng	TACATTTGTCGT	TACATTTGTCGA,TACATTTGTCGG,TACATTTNTCGT,TACCTTTGTCGT,TCCATTTGTCGT,TTCATTTGTCGT	125	2,1,1,1,1,1
Lib10^3 1 ng	TACGAATGCCTG	TACGAAGGCCTG,TACGANTGCCTG,TACGCATGCCTG,TACGGATGCCTG,TACGTATGCCTG,TTCGAATGCCTG	226	1,1,2,3,2,1
Lib10^3 1 ng	TACGGCTTGGTT	TACGGCATGGTT,TACGGCNTGGTT,TACGGCTTGGTG,TACGGGTTGGTT,TACGGTTTGGTT,TATGGCTTGGTT,TGCGGCTTGGTT,TTCGGCTTGGTT	298	1,1,1,1,1,1,1,2
Lib10^3 1 ng	TACGGGCGGGGA	TACGGGCGGAGA,TACGGGCGGGGT,TAGGGGCGGGGA	218	1,1,1
Lib10^3 1 ng	TACGGTCCAACT	TACGGGCCAACT,TACGGTCCAACA,TTCGGTCCAACT	212	1,1,1
Lib10^3 1 ng	TACTCTATGCAT	GACTCTATGCAT,TACTCTANGCAT,TACTCTNTGCAT	174	1,1,1
Lib10^3 1 ng	TACTGACTTTTT	TACTGACNTTTT,TACTGACTTCTT,TACTGACTTNTT,TACTGAGTTTTT,TACTGGCTTTTT,TACTGNCTTTTT,TACTGTCTTTTT,TATTGACTTTTT,TCCTGACTTTTT	303	1,1,1,1,2,1,2,1,1
Lib10^3 1 ng	TACTGCTATCGA		44
Lib10^3 1 ng	TACTGTGATCAG	GACTGTGATCAG,TACTGCGATCAG,TACTGGGATCAG,TACTGTGAACAG,TACTGTGATCAT,TACTGTGATCTG,TACTGTGCTCAG,TACTGTGTTCAG,TTCTGTGATCAG	205	1,1,1,1,1,4,1,1,1
Lib10^3 1 ng	TACTTGGGCGTA	TACTTGGGTGTA,TACTTGNGCGTA,TACTTGTGCGTA	287	2,1,1
Lib10^3 1 ng	TACTTTTTTGGC	TACTTTNTTGGC,TACTTTTATGGC,TACTTTTGTGGC,TACTTTTTCGGC,TACTTTTTTCGC	238	1,1,1,2,1
Lib10^3 1 ng	TAGAAAGAGGTA	TAGAAAGAGATA,TAGAAAGTGGTA	214	1,1
Lib10^3 1 ng	TAGAAATGAGGT	TAAAAATGAGGT,TAGAAATAAGGT,TAGAAATGAGGA,TAGAAATGGGGT,TAGAAATGTGGT,TAGGAATGAGGT,TAGTAATGAGGT,TTGAAATGAGGT	309	1,1,1,5,2,1,1,2
Lib10^3 1 ng	TAGACTGGGGTC	AAGACTGGGGTC,TAGACTGGCGTC,TAGACTGGGGGC,TAGACTNGGGTC,TAGTCTGGGGTC	117	1,1,1,1,1
Lib10^3 1 ng	TAGCATCCATTA	AAGCATCCATTA,TACCATCCATTA,TAGCAACCATTA,TAGCATCCTTTA	287	1,1,1,1
Lib10^3 1 ng	TAGCCTTATTGA	AAGCCTTATTGA,TAGCCTTATTGG,TAGCCTTATTGT	200	1,1,2
Lib10^3 1 ng	TAGCGGCGGTTG	TAGCGGCGGATG,TAGCGGCGGCTG,TAGCGGCGGGTG,TAGCGGCGGTAG,TAGCGGCGGTGG,TAGCGGCGGTTC,TAGCGGGGGTTG	210	8,2,17,2,1,1,2
Lib10^3 1 ng	TAGCGGTGTTGA	AAGCGGTGTTGA,TAGCGCTGTTGA,TAGCGGAGTTGA,TAGCGGTGATGA,TAGCGGTGGTGA,TAGCGGTGTGGA,TAGCGGTGTNGA,TAGCGGTGTTAA,TAGCGGTGTTGG,TAGCGGTGTTGT,TGGCGGTGTTGA,TTGCGGTGTTGA	428	1,1,1,2,1,1,1,1,4,2,1,2
Lib10^3 1 ng	TAGGAATAGTAT	TAAGAATAGTAT,TAGCAATAGTAT,TAGGAATACTAT,TAGGAATAGCAT,TAGGATTAGTAT,TAGGGATAGTAT,TAGGTATAGTAT	396	1,1,1,1,1,1,2
Lib10^3 1 ng	TAGGAGAATTTG	TAGGAGAAATTG,TAGGAGAATATG,TAGGAGAATCTG,TAGGAGAATTTA,TAGGGGAATTTG	218	1,1,1,1,1
Lib10^3 1 ng	TAGGATGTCTAA	TAGGAGGTCTAA,TAGGATGTCTTA,TAGGATGTGTAA,TAGGCTGTCTAA	356	1,1,1,1
Lib10^3 1 ng	TAGGCAGACAGG	TAGCCAGACAGG,TAGGCAGGCAGG,TAGGCAGTCAGG,TAGGCGGACAGG,TAGGCTGACAGG,TAGGTAGACAGG	341	1,2,1,1,1,1
Lib10^3 1 ng	TAGGTGGCCGCT	TAGGGGGCCGCT,TAGGTGGCCGCG,TAGGTGGTCGCT	225	1,1,1
Lib10^3 1 ng	TAGGTGGTTTTC	TAGATGGTTTTC,TAGGTGGATTTC,TAGGTGGGTTTC,TAGGTGGTTTTG,TAGGTGGTTTTT,TAGGTGTTTTTC,TAGGTNGTTTTC	223	1,1,4,1,1,1,1
Lib10^3 1 ng	TAGGTTAGAATC	TAGGGTAGAATC,TAGGTTAGGATC,TAGGTTAGTATC,TAGTTTAGAATC	221	1,1,1,1
Lib10^3 1 ng	TAGGTTTGGTAG	TAGGTGTGGTAG,TAGGTTTGGTAA,TAGGTTTGGTTG,TTGGTTTGGTAG	219	1,1,2,1
Lib10^3 1 ng	TAGTAACCTGGC	TAGGAACCTGGC,TAGTAANCTGGC,TAGTAGCCTGGC,TTGTAACCTGGC	266	1,1,1,1
Lib10^3 1 ng	TAGTATGTGTGA	CAGTATGTGTGA,TAGTATGAGTGA,TAGTATGTGGGA,TAGTATGTGTGC	138	1,1,1,1
Lib10^3 1 ng	TAGTGACTTAAC	TACTGACTTAAC,TAGTGATTTAAC,TAGTGTCTTAAC,TGGTGACTTAAC	155	1,1,2,1
Lib10^3 1 ng	TAGTGAGGTATA	TAGTGCGGTATA,TAGTGGGGTATA,TAGTGTGGTATA	233	1,1,1
Lib10^3 1 ng	TAGTGTAGTCCT		70
Lib10^3 1 ng	TAGTGTGTAGCT		97
Lib10^3 1 ng	TAGTGTGTTACT	AAGTGTGTTACT,TAGAGTGTTACT,TAGGGTGTTACT,TAGTATGTTACT,TAGTGCGTTACT,TAGTGTATTACT,TAGTGTGATACT,TAGTGTGTTATT,TAGTGTGTTCCT,TAGTGTNTTACT,TTGTGTGTTACT	503	1,4,1,1,1,1,1,1,1,1,1
Lib10^3 1 ng	TAGTGTTCCTGT	TAGTGATCCTGT,TAGTGGTCCTGT,TAGTGTTCCAGT,TAGTGTTCCNGT,TGGTGTTCCTGT	245	2,1,1,1,1
Lib10^3 1 ng	TAGTTATGTTAG	TAGGTATGTTAG,TAGTAATGTTAG,TAGTTATGATAG,TAGTTATGTGAG,TAGTTATGTTTG,TAGTTCTGTTAG,TCGTTATGTTAG	317	1,1,1,1,1,1,1
Lib10^3 1 ng	TAGTTCCGAGAA	TAGGTCCGAGAA,TAGTCCCGAGAA,TAGTTCCGACAA,TAGTTCCGAGAT,TAGTTCCGAGGA,TAGTTCCGTGAA,TAGTTTCGAGAA	206	1,1,1,1,2,3,1
Lib10^3 1 ng	TAGTTCTTGTAT	TAGTCCTTGTAT,TAGTTCNTGTAT,TAGTTCTTGGAT,TAGTTCTTGTTT	356	1,1,3,1
Lib10^3 1 ng	TAGTTGTTGCCA	TAATTGTTGCCA,TAGTTGGTGCCA,TAGTTGTTGACA,TGGTTGTTGCCA,TTGTTGTTGCCA	204	1,1,1,1,1
Lib10^3 1 ng	TAGTTTCCGCAC	TAGATTCCGCAC,TAGGTTCCGCAC,TAGTTCCCGCAC,TAGTTTCCGTAC	252	1,1,1,1
Lib10^3 1 ng	TATAACTTGCGG	AATAACTTGCGG,TATAACTTGCGA,TATAACTTGCGC,TTTAACTTGCGG	340	1,1,1,1
Lib10^3 1 ng	TATAAGTGGGAT	TATAAGAGGGAT,TATAAGTGAGAT,TATAAGTGGGGT,TATAAGTGGTAT,TATAAGTNGGAT,TTTAAGTGGGAT	242	1,1,2,1,1,1
Lib10^3 1 ng	TATACAATCTCG	GATACAATCTCG,TATAGAATCTCG	180	1,1
Lib10^3 1 ng	TATACTCTCGCT	CATACTCTCGCT,TATACACTCGCT,TATACCCTCGCT,TATACTCCCGCT,TATACTCTCGTT	172	1,1,1,1,1
Lib10^3 1 ng	TATAGCATGGGA	TAAAGCATGGGA,TATAGCATGGGG	167	1,1
Lib10^3 1 ng	TATAGGGTTACG	AATAGGGTTACG,TATAGGCTTACG,TATAGGGGTACG,TATAGGGNTACG,TATAGGGTAACG,TATCGGGTTACG,TATTGGGTTACG	301	1,1,1,1,1,1,1
Lib10^3 1 ng	TATATACCTTAT	TATATACGTTAT,TATATTCCTTAT,TGTATACCTTAT	272	1,1,1
Lib10^3 1 ng	TATCAGCTCGAA	TATCAGCTCGGA,TATCAGCTCGTA	155	3,1
Lib10^3 1 ng	TATCATAAGTGT	TATCATAACTGT	326	1
Lib10^3 1 ng	TATCATTTCTTT	TATCATTACTTT,TATCATTTCATT,TATCATTTCCTT,TATTATTTCTTT	191	1,1,1,1
Lib10^3 1 ng	TATCCATTGTAT	TATCAATTGTAT,TATCCATNGTAT,TATCCATTGAAT,TATCCATTGGAT,TATCCTTTGTAT	122	1,1,1,1,1
Lib10^3 1 ng	TATCCTTCGTCC	TATCCTTCGACC,TATCCTTTGTCC	114	1,1
Lib10^3 1 ng	TATCGATGGGCT	TATCCATGGGCT,TATCGAAGGGCT,TATCGATGGACT,TATCGATGGGGT,TATCGATGTGCT,TATCGATNGGCT,TATCGCTGGGCT,TATCGGTGGGCT,TATCGTTGGGCT,TTTCGATGGGCT	388	1,1,1,1,1,2,1,1,1,1
Lib10^3 1 ng	TATCGCTCTTCC	TATCGCTCTACC,TATCGCTCTTCG	199	1,1
Lib10^3 1 ng	TATCTATCGGGT		130
Lib10^3 1 ng	TATCTCTAATTG	TATCTCTAAGTG,TATCTNTAATTG	95	1,1
Lib10^3 1 ng	TATCTGAGTGCC	TATCTGGGTGCC	24	1
Lib10^3 1 ng	TATCTGGTTTTT	TATCTAGTTTTT,TATCTGGTCTTT,TATCTGGTTGTT,TATCTGGTTTGT,TATGTGGTTTTT,TATNTGGTTTTT	219	1,1,1,1,1,1
Lib10^3 1 ng	TATGACTATCCG	TATGACTCTCCG,TATGACTNTCCG,TATGACTTTCCG	254	1,1,1
Lib10^3 1 ng	TATGAGCAGTGT	TATGGGCAGTGT,TATGTGCAGTGT	116	1,1
Lib10^3 1 ng	TATGATCACCAC	TATCATCACCAC,TATGATCACAAC,TATGATCACCAG,TATGATNACCAC,TATGGTCACCAC,TATGTTCACCAC	275	1,1,2,2,1,3
Lib10^3 1 ng	TATGGGTGTCTT	TAAGGGTGTCTT,TATGAGTGTCTT,TATGGGTGTCTA,TATGGGTGTCTC,TTTGGGTGTCTT	252	1,1,2,1,1
Lib10^3 1 ng	TATGGTGCCGGA	AATGGTGCCGGA,TATCGTGCCGGA,TATGATGCCGGA,TATGGTGCCGGC,TATGGTGCCGGG,TATGGTGCCGGT,TATNGTGCCGGA	227	1,1,1,2,4,4,1
Lib10^3 1 ng	TATGGTTTAGCT	TATGGTGTAGCT,TATGGTTAAGCT	293	1,1
Lib10^3 1 ng	TATGGTTTTTAT	TATGGNTTTTAT	63	1
Lib10^3 1 ng	TATTAGGTGTGA	TACTAGGTGTGA,TATTACGTGTGA,TATTAGGAGTGA,TATTAGGGGTGA,TATTAGGTATGA,TATTAGGTGGGA,TATTAGGTGTCA,TATTAGGTGTGC,TATTAGGTGTGG,TATTAGGTGTGT,TATTANGTGTGA	368	1,1,1,1,1,1,1,1,1,2,1
Lib10^3 1 ng	TATTATTAGCCT	TATTATTTGCCT	127	1
Lib10^3 1 ng	TATTATTCGGGC	TATTATTCGCGC	115	1
Lib10^3 1 ng	TATTATTTTTCC	TATAATTTTTCC	37	1
Lib10^3 1 ng	TATTCAGCGGAA	TATTCAGCGAAA,TATTCAGCGGTA	107	1,1
Lib10^3 1 ng	TATTCCTCGCTC	TATTCCTAGCTC	181	1
Lib10^3 1 ng	TATTCGCTCCAT	AATTCGCTCCAT,TATTCACTCCAT,TATTCCCTCCAT,TATTCGCNCCAT,TATTCGCTGCAT	373	1,1,1,1,1
Lib10^3 1 ng	TATTCTATCCCC	TAATCTATCCCC,TATTCTGTCCCC	145	1,1
Lib10^3 1 ng	TATTGAACGTGA	TATTGAACGTGT,TATTGCACGTGA,TATTGGACGTGA,TATTGTACGTGA	226	1,2,2,1
Lib10^3 1 ng	TATTGCTGCTTG	TAATGCTGCTTG,TATNGCTGCTTG,TATTGCTGCATG,TCTTGCTGCTTG,TGTTGCTGCTTG	229	1,2,1,1,1
Lib10^3 1 ng	TATTGTGTCTTC	GATTGTGTCTTC	198	1
Lib10^3 1 ng	TATTTCGCTGGG	TATTTCACTGGG,TATTTCCCTGGG	290	1,1
Lib10^3 1 ng	TCAAAGGGTATC	TCAAAGAGTATC,TCAAAGGGTACC,TCAAAGGGTCTC,TCAAAGTGTATC,TCAANGGGTATC	229	1,1,1,1,1
Lib10^3 1 ng	TCAAAGTTTTAA	ACAAAGTTTTAA,TAAAAGTTTTAA,TCAAAATTTTAA,TCAAAGATTTAA,TCAAAGTTTTAG	376	1,1,1,1,1
Lib10^3 1 ng	TCAAATATGGTA	ACAAATATGGTA,GCAAATATGGTA,TCAAANATGGTA,TCAAATATGCTA,TCAACTATGGTA	290	1,1,1,1,1
Lib10^3 1 ng	TCAACCTTCATT		47
Lib10^3 1 ng	TCAACTGGGTTT	TCAACTGGCTTT,TCAACTGGGATT,TCAACTGGGTAT,TCAACTGGGTCT,TCAACTGNGTTT,TCAACTGTGTTT,TCAGCTGGGTTT,TCTACTGGGTTT	326	1,1,1,1,1,1,2,1
Lib10^3 1 ng	TCAATATGGGAC	TCAATATGGCAC,TCAATATGGGAA,TCAATNTGGGAC,TCTATATGGGAC,TGAATATGGGAC	280	1,1,1,1,1
Lib10^3 1 ng	TCACATCGCTGC	TCACATCCCTGC,TCGCATCGCTGC	213	1,1
Lib10^3 1 ng	TCAGACTGCACA	TCAGACGGCACA,TCAGACNGCACA,TCAGACTGTACA,TCAGANTGCACA,TCAGCCTGCACA,TCAGGCTGCACA,TCAGTCTGCACA	337	1,1,1,1,1,1,6
Lib10^3 1 ng	TCAGATGATCTG	TCAGATGTTCTG,TCAGGTGATCTG	21	1,1
Lib10^3 1 ng	TCAGCTAGTGGG	ACAGCTAGTGGG,TCAGCTAGAGGG,TCAGCTAGCGGG,TCAGCTAGGGGG,TCAGCTANTGGG	158	1,1,2,1,1
Lib10^3 1 ng	TCAGGGCATCGG	TCAGGACATCGG,TCAGGGCATCCG,TCAGGGCATCGA,TCAGGGCATCGT,TCAGGGCATTGG,TCAGGGCCTCGG,TCAGTGCATCGG	365	2,1,1,1,1,1,1
Lib10^3 1 ng	TCAGTGATTGTC	TCAATGATTGTC,TCAGAGATTGTC,TCAGTGATTGAC,TCAGTGATTGGC,TCAGTGATTGTG,TCAGTGGTTGTC,TCAGTGTTTGTC	310	1,1,1,1,1,1,1
Lib10^3 1 ng	TCATACATATTC		72
Lib10^3 1 ng	TCATAGCGTTTC	TCATAGCGATTC,TCATAGCGGTTC,TCATAGCGTCTC,TCATAGCNTTTC,TCATATCGTTTC,TCATTGCGTTTC	242	1,1,1,1,1,2
Lib10^3 1 ng	TCATCAGTCTAG	TCATCAGTCTTG	125	1
Lib10^3 1 ng	TCATGCGCCCTT	TCATGCCCCCTT,TCATGCGCCCTA,TCATGCGCTCTT,TCATGCGGCCTT	189	1,1,1,1
Lib10^3 1 ng	TCATGCGGTCAA	TCATGCGCTCAA,TCATGCGGTAAA,TCATGCGGTCAC,TCATGGGGTCAA,TCATGNGGTCAA	385	1,1,1,1,1
Lib10^3 1 ng	TCATGTCGGCAT	TCATGTCAGCAT,TCATGTCGGAAT,TCATGTCGGTAT	268	1,1,1
Lib10^3 1 ng	TCATTAAAATAC	TCATTAAAAGAC,TCATTNAAATAC,TCTTTAAAATAC	225	1,1,1
Lib10^3 1 ng	TCATTAAGAGTC	TCATTAAGGGTC	349	1
Lib10^3 1 ng	TCATTGCGCATT	GCATTGCGCATT,TCACTGCGCATT,TCAGTGCGCATT,TCATTGCGCAAT,TCATTGCGCATC,TCATTGCNCATT	436	2,1,1,1,1,1
Lib10^3 1 ng	TCATTTAACCAC	TAATTTAACCAC	131	1
Lib10^3 1 ng	TCATTTCGCTTA	TCAGTTCGCTTA,TCATTACGCTTA,TCTTTTCGCTTA	179	1,1,1
Lib10^3 1 ng	TCCACGAGGACT	TCCACGAGAACT,TCCACGAGCACT,TCCACGAGGGCT,TCCACGAGGTCT,TCCACGGGGACT,TCCACGNGGACT,TCCACGTGGACT,TCCANGAGGACT,TCCTCGAGGACT	397	1,1,1,1,2,1,1,1,1
Lib10^3 1 ng	TCCAGCGCCGTC	TCCAGAGCCGTC,TCCAGCGCCGCC,TCCAGCGCCGTG,TCCGGCGCCGTC	224	1,1,1,1
Lib10^3 1 ng	TCCATGCACGCG	ACCATGCACGCG,TCCAAGCACGCG,TCCATGCNCGCG,TCCATGCTCGCG,TCCTTGCACGCG	217	1,1,1,1,1
Lib10^3 1 ng	TCCCATGGTCTC	ACCCATGGTCTC,TCCCAGGGTCTC,TCCCATGATCTC,TCCCATGGTCTG	251	1,1,1,1
Lib10^3 1 ng	TCCCCTGGCCCT	TCCCCNGGCCCT,TCCNCTGGCCCT	214	1,1
Lib10^3 1 ng	TCCGCCCGGACC	TCCGCCCGGCCC,TCCGCCCGGTCC,TCCGCCTGGACC	135	2,2,2
Lib10^3 1 ng	TCCGGCGGATGG	TCCGGAGGATGG,TCCGGCGCATGG,TCCGGCGGAAGG,TCCGGCGGATGA,TCCGGCGGCTGG,TCCGGCGGGTGG,TCCGGCGGTTGG,TCCGGGGGATGG,TCCGGTGGATGG,TCTGGCGGATGG,TGCGGCGGATGG,TTCGGCGGATGG	749	1,3,2,1,1,9,3,1,1,2,1,1
Lib10^3 1 ng	TCCGGGCAGATT	TCCGGGCAGAGT,TCCGGGCAGGTT,TCCGGGCAGTTT,TCCGGGCTGATT,TCCGGGNAGATT,TCCGGGTAGATT	228	1,1,1,1,1,1
Lib10^3 1 ng	TCCGGTCTAATC	TCCGGTNTAATC	125	1
Lib10^3 1 ng	TCCGTGGGTTAT	TCCGGGGGTTAT,TCCGTCGGTTAT,TCCGTGCGTTAT,TCCGTGGATTAT,TCGGTGGGTTAT	147	1,1,1,1,1
Lib10^3 1 ng	TCCTGCCTCTGA	TCCTGCCNCTGA,TCCTGCCTCAGA,TCCTGCCTCTGG,TCCTGCCTCTGT,TCCTGCNTCTGA,TCCTGGCTCTGA	346	1,1,5,1,1,1
Lib10^3 1 ng	TCCTGGGCTTCA	TCCTGGGCTACA,TCCTGNGCTTCA,TCCTGTGCTTCA,TCTTGGGCTTCA,TGCTGGGCTTCA	273	1,1,1,1,1
Lib10^3 1 ng	TCCTTCAAGGTT	TCCTTCAAGATT,TCCTTCAAGCTT,TCCTTCAAGTTT,TCGTTCAAGGTT	301	2,1,1,1
Lib10^3 1 ng	TCCTTCTTGGTT	TCCCTCTTGGTT,TCCTTCTTGCTT	202	2,1
Lib10^3 1 ng	TCCTTGTCTCTC	TCCTTGCCTCTC	187	1
Lib10^3 1 ng	TCCTTTGTGCTC	TCCATTGTGCTC,TCCCTTGTGCTC,TCCTTAGTGCTC,TCCTTTGAGCTC	137	1,1,1,1
Lib10^3 1 ng	TCCTTTTGACTC	ACCTTTTGACTC,TCCTTTTGACCC,TCCTTTTGGCTC,TCCTTTTGTCTC	294	1,1,2,4
Lib10^3 1 ng	TCCTTTTTTAGT	TCCTTATTTAGT,TCCTTGTTTAGT,TCCTTTTTTCGT,TCCTTTTTTTGT,TTCTTTTTTAGT	233	1,1,1,1,1
Lib10^3 1 ng	TCGACGCGGATG	TCGACGCGGATA,TCGACGCGGCTG,TCGACGCGGGTG,TCGACGCGGTTG,TCGCCGCGGATG,TCGGCGCGGATG,TCGTCGCGGATG	351	1,3,11,3,1,4,4
Lib10^3 1 ng	TCGAGTCTGATC	TCGAGTCTGGTC,TCGAGTCTGTTC,TCGGGTCTGATC,TCGTGTCTGATC	116	3,2,2,1
Lib10^3 1 ng	TCGCATTTCCGG	TCGCATTTCCGT,TCGCATTTCGGG,TCGCATTTCTGG	276	1,1,2
Lib10^3 1 ng	TCGCCCGCATGT	CCGCCCGCATGT,TCGCCCCCATGT,TCGCCCGCATGA,TCGCCCGNATGT,TCGCCNGCATGT	241	1,1,1,1,1
Lib10^3 1 ng	TCGCGTTCTCCT	TCGCCTTCTCCT,TCGCGATCTCCT,TCGCGTTCGCCT	268	1,1,1
Lib10^3 1 ng	TCGCTCTGTGTG	TCGCACTGTGTG,TCGCTCTGTCTG	242	1,1
Lib10^3 1 ng	TCGCTGGCCCAC	TCCCTGGCCCAC,TCGCTGACCCAC,TCGCTGCCCCAC,TCGCTGGCCTAC,TCGCTGGTCCAC,TCGGTGGCCCAC	342	1,1,2,1,1,1
Lib10^3 1 ng	TCGCTTTCAGGC	TCACTTTCAGGC,TCGCCTTCAGGC,TCGCTGTCAGGC,TCGCTTNCAGGC,TCGCTTTCTGGC,TCGNTTTCAGGC,TTGCTTTCAGGC	268	1,1,1,1,2,1,2
Lib10^3 1 ng	TCGGGACGTGCG	CCGGGACGTGCG,TCGGGACGCGCG,TTGGGACGTGCG	299	1,1,1
Lib10^3 1 ng	TCGGGCAGGTTA	TCGGGCAGGATA,TCGGGCAGGGTA,TCGGGCAGTTTA,TCGGGGAGGTTA,TCGGGTAGGTTA	273	2,2,1,2,1
Lib10^3 1 ng	TCGGGGTGTTTT	TCGGGCTGTTTT,TCGGGGGGTTTT,TCGGGGTGTATT,TCGGGGTNTTTT	66	1,1,1,1
Lib10^3 1 ng	TCGGGTCCCTTT	TCGGGCCCCTTT,TCGGGTCCCATT,TCGGGTCCCCTT,TCGGGTCCCTTC,TCGGGTNCCTTT	216	2,1,1,1,1
Lib10^3 1 ng	TCGGTAAGGTCT	TCGGGAAGGTCT,TCGGTAAGCTCT,TCGGTNAGGTCT,TTGGTAAGGTCT	333	1,1,1,1
Lib10^3 1 ng	TCGGTCCCCGTT	TCCGTCCCCGTT,TCGCTCCCCGTT,TCGGTCCCCGAT,TCGGTCCCCGGT,TCGNTCCCCGTT	236	1,1,1,1,1
Lib10^3 1 ng	TCGGTCTAAATC	TCCGTCTAAATC,TCGCTCTAAATC	54	1,1
Lib10^3 1 ng	TCGGTCTATTGG	TCGGTCTAATGG	48	1
Lib10^3 1 ng	TCGGTGCCGTTC	TCCGTGCCGTTC,TCGGTGCCGGTC	102	1,1
Lib10^3 1 ng	TCGGTTGGATCA	TCGGATGGATCA,TCGGTTGAATCA,TCGGTTGGTTCA,TCGGTTTGATCA	242	1,1,1,1
Lib10^3 1 ng	TCGGTTTATTAG	TCCGTTTATTAG,TCGGATTATTAG,TCGGGTTATTAG,TCGGTTTACTAG,TCGGTTTATTTG,TCGGTTTNTTAG	312	1,1,1,1,1,1
Lib10^3 1 ng	TCGTACCCGGGG	TCGCACCCGGGG,TCGNACCCGGGG,TGGTACCCGGGG	268	1,1,1
Lib10^3 1 ng	TCGTCGCCTCGG	TAGTCGCCTCGG,TCGTCGTCTCGG	105	1,1
Lib10^3 1 ng	TCGTCTCTTGCG	GCGTCTCTTGCG,TCGACTCTTGCG,TCGCCTCTTGCG,TCGGCTCTTGCG,TCGTCTCATGCG,TCGTCTCTAGCG,TCGTCTCTCGCG,TCGTCTCTTCCG,TCGTCTCTTGGG,TCGTCTNTTGCG	330	1,1,1,1,1,1,1,1,1,2
Lib10^3 1 ng	TCGTGTTAGTTT	ACGTGTTAGTTT,TCGAGTTAGTTT,TCGGGTTAGTTT,TCGTGATAGTTT,TCGTGNTAGTTT,TCGTGTTAGATT,TCGTGTTAGGTT,TCGTGTTAGTAT,TCGTGTTAGTCT,TTGTGTTAGTTT	307	1,1,1,1,2,1,1,1,1,1
Lib10^3 1 ng	TCGTTAGTTGGG	TCGTAAGTTGGG,TCGTTAGTTGGC,TCGTTTGTTGGG	189	1,1,1
Lib10^3 1 ng	TCGTTCCGTGTG	GCGTTCCGTGTG,TCGATCCGTGTG,TCGGTCCGTGTG,TCGTTCCGTGAG,TCGTTCCGTGGG,TCGTTCCGTGTC	283	1,1,3,1,2,1
Lib10^3 1 ng	TCGTTCGTGTTT	TCGTGCGTGTTT,TCGTTCCTGTTT,TCGTTCGGGTTT,TCGTTCGNGTTT,TCGTTCGTCTTT	239	1,1,1,1,1
Lib10^3 1 ng	TCGTTGCGCTCC	TCGTTCCGCTCC,TCGTTGCGCACC,TCGTTGCGTTCC	77	1,1,1
Lib10^3 1 ng	TCGTTGTCGGCT	TAGTTGTCGGCT,TCATTGTCGGCT,TCGCTGTCGGCT,TCGGTGTCGGCT,TCGNTGTCGGCT,TCGTTGACGGCT,TCGTTGCCGGCT,TCGTTGGCGGCT,TCGTTGTCGGAT,TCGTTGTCGGCC,TCGTTGTCGTCT,TCGTTGTGGGCT,TTGTTGTCGGCT	648	1,1,1,2,1,2,1,2,1,1,1,1,1
Lib10^3 1 ng	TCTAATTGCTAT	TCTAANTGCTAT,TCTAGTTGCTAT	201	1,1
Lib10^3 1 ng	TCTACAGGCTCC	TCTACAGACTCC,TCTACAGGCTCG,TCTACAGGGTCC,TCTACCGGCTCC,TCTACTGGCTCC,TCTCCAGGCTCC,TTTACAGGCTCC	307	1,1,1,1,2,1,1
Lib10^3 1 ng	TCTACTATCTAT	TCTAATATCTAT,TCTACTATCTAA,TGTACTATCTAT	182	1,1,1
Lib10^3 1 ng	TCTAGTCTATGG	TCTAGTCTAAGG,TCTAGTCTACGG,TCTAGTCTCTGG,TCTAGTNTATGG,TCTNGTCTATGG	176	1,1,1,1,1
Lib10^3 1 ng	TCTAGTTGCATT		198
Lib10^3 1 ng	TCTATCGATGGA	TCTATCGATGGG,TCTATCGGTGGA,TCTATCGTTGGA	132	1,1,1
Lib10^3 1 ng	TCTATGTCAGGT	TCTAAGTCAGGT,TCTATCTCAGGT,TCTATGGCAGGT,TCTATGTCACGT,TCTATGTCATGT,TCTATGTTAGGT	277	1,1,1,1,1,1
Lib10^3 1 ng	TCTATGTGATGG	TCTATGNGATGG,TCTATGTGATGC,TCTATGTGTTGG,TCTATTTGATGG	341	1,2,1,1
Lib10^3 1 ng	TCTATTGTTATG	TCTATTGATATG,TCTATTGGTATG,TCTATTGTCATG,TCTATTGTTAAG,TCTATTGTTTTG,TCTTTTGTTATG	314	1,1,1,1,2,1
Lib10^3 1 ng	TCTCAACTTTTG	TCTCATCTTTTG,TCTCCACTTTTG	179	1,1
Lib10^3 1 ng	TCTCGCTTAATG	TCACGCTTAATG,TCTCACTTAATG,TCTCGCTTAGTG	294	1,1,1
Lib10^3 1 ng	TCTCTAGTGCGC	TCTCTAGNGCGC,TCTCTAGTGCCC,TCTCTCGTGCGC,TCTCTNGTGCGC,TCTCTTGTGCGC	295	1,1,1,1,2
Lib10^3 1 ng	TCTCTATTGGTC	CCTCTATTGGTC,TCTCTATTGGAC,TCTCTATTGGCC	101	1,1,1
Lib10^3 1 ng	TCTCTGTTCCCA	ACTCTGTTCCCA,TCTCTGATCCCA,TCTCTGTACCCA,TCTCTGTNCCCA,TCTGTGTTCCCA	209	1,1,1,1,1
Lib10^3 1 ng	TCTGAAAGAGGA	TATGAAAGAGGA,TCAGAAAGAGGA,TCTGAAAGGGGA,TCTGAAAGTGGA,TCTGAAANAGGA,TCTGAATGAGGA,TCTGANAGAGGA,TCTGATAGAGGA,TCTGCAAGAGGA,TCTGTAAGAGGA	316	1,1,1,1,1,1,2,1,1,3
Lib10^3 1 ng	TCTGATGCGGCT	TCTCATGCGGCT,TCTGATGAGGCT,TCTGATGCGGCA,TCTGATGCGGTT,TCTGGTGCGGCT,TCTGTTGCGGCT,TCTNATGCGGCT	356	1,1,1,1,5,2,1
Lib10^3 1 ng	TCTGATTGATGG	TCTGATTGATGT,TCTGATTGGTGG,TCTGATTGTTGG,TCTGGTTGATGG,TCTGTTTGATGG,TGTGATTGATGG	460	1,3,4,2,1,1
Lib10^3 1 ng	TCTGCGCGTCTT	ACTGCGCGTCTT,TCTGCGCCTCTT,TCTGCNCGTCTT,TNTGCGCGTCTT	132	1,1,1,1
Lib10^3 1 ng	TCTGCGTATGAG	TCTGCGGATGAG,TCTGCGNATGAG,TCTGCGTATGCG,TCTGCGTATGGG,TCTGCGTATGTG,TCTGGGTATGAG	345	1,1,4,9,14,1
Lib10^3 1 ng	TCTGCGTCGGGG	TCTGCGCCGGGG,TGTGCGTCGGGG	257	1,1
Lib10^3 1 ng	TCTGGTAATCCG	ACTGGTAATCCG,CCTGGTAATCCG,TCTGCTAATCCG,TCTGGCAATCCG	269	1,1,1,1
Lib10^3 1 ng	TCTGGTCGATCC	TCTGGACGATCC,TCTGGTCGTTCC,TCTGGTNGATCC	55	1,2,1
Lib10^3 1 ng	TCTGTAGTTCGT	TCAGTAGTTCGT,TCTGTAGTACGT,TCTGTAGTTCGC,TCTGTAGTTGGT	205	1,1,1,1
Lib10^3 1 ng	TCTGTGTGTCCT	TCTCTGTGTCCT,TCTGTGTATCCT,TCTGTGTGACCT,TCTGTGTGTGCT	293	1,1,2,1
Lib10^3 1 ng	TCTTAACGTTTC	TCTTAACGGTTC,TCTTAACGTATC,TCTTAANGTTTC,TCTTATCGTTTC	259	1,1,1,1
Lib10^3 1 ng	TCTTAAGGTCGG	ACTTAAGGTCGG,TCTTAACGTCGG,TCTTAAGATCGG,TCTTAAGCTCGG	169	1,1,1,1
Lib10^3 1 ng	TCTTATAAACCA	TCCTATAAACCA,TCTTATATACCA	39	1,1
Lib10^3 1 ng	TCTTATTCTGTG	TATTATTCTGTG,TCTTANTCTGTG,TCTTATTCTGCG,TCTTATTNTGTG	166	1,1,1,1
Lib10^3 1 ng	TCTTATTCTTTA		216
Lib10^3 1 ng	TCTTATTGAGAT	TATTATTGAGAT,TCTGATTGAGAT,TCTTAGTGAGAT,TCTTATTGAGGT,TCTTATTGGGAT,TCTTATTGTGAT,TGTTATTGAGAT	289	1,1,1,1,1,10,1
Lib10^3 1 ng	TCTTCGTTACGT	TCTNCGTTACGT,TCTTCGCTACGT	287	1,1
Lib10^3 1 ng	TCTTCTTCGGAG	CCTTCTTCGGAG,TCTTCCTCGGAG,TCTTCTTCGCAG,TCTTCTTCGGCG,TCTTCTTCGGGG,TCTTCTTCGGTG,TCTTCTTNGGAG	250	1,1,1,2,8,12,1
Lib10^3 1 ng	TCTTGGTATTTC	TCTGGGTATTTC,TCTTGGNATTTC	150	1,1
Lib10^3 1 ng	TCTTGTAGCGCA	ACTTGTAGCGCA,TCATGTAGCGCA,TCCTGTAGCGCA,TCTNGTAGCGCA,TCTTGGAGCGCA,TCTTGTAGCCCA,TCTTGTANCGCA,TCTTGTTGCGCA,TTTTGTAGCGCA	276	1,1,1,1,2,1,1,1,1
Lib10^3 1 ng	TCTTTACGGCAT	ACTTTACGGCAT,TCTCTACGGCAT,TCTTAACGGCAT,TCTTCACGGCAT,TCTTTACAGCAT,TCTTTACGGCCT,TCTTTACGTCAT,TCTTTCCGGCAT	191	1,1,1,1,1,1,2,1
Lib10^3 1 ng	TCTTTATCAGAG	TCTTTATCAGCG,TCTTTATCAGGG,TCTTTATCAGTG,TGTTTATCAGAG	112	1,3,5,1
Lib10^3 1 ng	TCTTTGGTGATA	ACTTTGGTGATA,CCTTTGGTGATA,TCTTTGCTGATA,TCTTTGGTGCTA,TCTTTTGTGATA	190	1,1,1,1,2
Lib10^3 1 ng	TCTTTTGTCTTT	TCTTGTGTCTTT,TCTTTTNTCTTT	176	1,1
Lib10^3 1 ng	TCTTTTTATGTC		112
Lib10^3 1 ng	TGAAAAGAACGA	AGAAAAGAACGA,TGAAAAGAACGG,TGAAAAGAACGT,TGAAAAGAGCGA,TGAAAAGCACGA,TGAAAAGGACGA,TGAAAAGTACGA,TGAATAGAACGA,TGTAAAGAACGA	249	1,1,1,1,1,2,1,1,2
Lib10^3 1 ng	TGAACGTGGTGG	TGAACGAGGTGG,TGAACGGGGTGG,TGGACGTGGTGG,TGTACGTGGTGG	138	1,1,2,1
Lib10^3 1 ng	TGAACTTTGATA	TAAACTTTGATA,TGAACTTAGATA,TGAACTTTGATT,TGAACTTTGGTA,TGANCTTTGATA,TGCACTTTGATA	204	1,1,1,1,1,1
Lib10^3 1 ng	TGAATGCTGGTA	CGAATGCTGGTA,GGAATGCTGGTA,TGAAAGCTGGTA,TGAATGCTCGTA,TGAATGCTGATA,TGAATGCTGCTA,TGAATGCTGTTA,TGGATGCTGGTA,TGTATGCTGGTA	332	1,1,1,1,1,1,1,1,2
Lib10^3 1 ng	TGACCTCCTTGT	CGACCTCCTTGT,TGACCTCCTTGG,TGCCCTCCTTGT,TGGCCTCCTTGT	173	1,1,3,5
Lib10^3 1 ng	TGACTTATCTGT	TGACTTACCTGT,TGACTTANCTGT,TGACTTATCTGG,TGGCTTATCTGT,TGTCTTATCTGT	322	2,1,1,2,5
Lib10^3 1 ng	TGACTTCCTATC	TGACGTCCTATC,TGACTTCCTACC,TGACTTCCTATT,TGACTTCCTTTC,TGACTTCNTATC,TGCCTTCCTATC,TGGCTTCCTATC,TGTCTTCCTATC,TTACTTCCTATC	281	1,1,1,1,1,2,2,8,1
Lib10^3 1 ng	TGACTTTTTGGA	TGACTTNTTGGA,TGACTTTNTGGA,TGACTTTTTGGG,TGACTTTTTGGT	207	1,1,2,2
Lib10^3 1 ng	TGAGAGTACTTC	TCAGAGTACTTC,TGAGAGTTCTTC,TGAGCGTACTTC,TGAGGGTACTTC,TGAGTGTACTTC,TGTGAGTACTTC	291	2,1,1,2,1,1
Lib10^3 1 ng	TGAGCGATTTTT	TCAGCGATTTTT,TGAGCGGTTTTT,TGAGCGTTTTTT,TGAGCTATTTTT,TGGGCGATTTTT,TGTGCGATTTTT	178	1,1,1,1,3,4
Lib10^3 1 ng	TGAGGGATTTAA	TAAGGGATTTAA,TGAGGCATTTAA,TGAGGTATTTAA,TGTGGGATTTAA	145	1,2,1,2
Lib10^3 1 ng	TGAGTGTAGTTG	TGACTGTAGTTG,TGAGTGTAGGTG,TGAGTGTAGTAG,TGGGTGTAGTTG	307	1,1,1,5
Lib10^3 1 ng	TGATCATCCAAT	AGATCATCCAAT,TGATCANCCAAT,TGATCCTCCAAT,TGATGATCCAAT,TGGTCATCCAAT,TGTTCATCCAAT	301	1,1,1,1,6,2
Lib10^3 1 ng	TGATCCTTTTGT	TGATCCTTTTGA,TGATCCTTTTGG,TGATCNTTTTGT,TGATTCTTTTGT,TGGTCCTTTTGT,TGTTCCTTTTGT	199	2,1,1,1,2,1
Lib10^3 1 ng	TGATCTTGTGCT	TCATCTTGTGCT,TGATCGTGTGCT,TGATCTTGAGCT,TGATCTTGGGCT,TGATCTTGTGGT,TGATGTTGTGCT,TGGTCTTGTGCT,TGTTCTTGTGCT	271	1,1,1,1,1,1,2,1
Lib10^3 1 ng	TGATGGTGGCTA	TGATGATGGCTA,TGATGGTAGCTA,TGATGGTGGCCA,TGATGGTGGGTA,TGATGNTGGCTA,TGGTGGTGGCTA	288	1,1,1,1,1,2
Lib10^3 1 ng	TGATTACGTCTC	TGATTNCGTCTC,TGTTTACGTCTC	185	1,1
Lib10^3 1 ng	TGATTATCTCCG	TGATTATCTACG,TGATTATCTCCA,TGGTTATCTCCG	179	1,1,1
Lib10^3 1 ng	TGATTCTAGTTA		65
Lib10^3 1 ng	TGATTTCATGTA	TAATTTCATGTA,TGATTTCATGGA,TGCTTTCATGTA,TGGTTTCATGTA,TGTTTTCATGTA	118	1,1,1,1,1
Lib10^3 1 ng	TGCAAGCGCTCA	TGCAACCGCTCA,TGCAAGCGCACA,TGCAAGCGTTCA	262	1,2,1
Lib10^3 1 ng	TGCAAGGGGATT	TGCAAGGNGATT,TGTAAGGGGATT	278	1,1
Lib10^3 1 ng	TGCAATGTGAGC	TGAAATGTGAGC,TGCAAAGTGAGC,TGCAATGTGAGG,TGCAATGTGGGC,TGCAATGTGTGC	440	1,1,1,7,10
Lib10^3 1 ng	TGCAATTTTACG	GGCAATTTTACG,TCCAATTTTACG	190	1,1
Lib10^3 1 ng	TGCAGAAGCTGA	TGCAGAAGCTGT,TGCAGAANCTGA,TGCAGGAGCTGA,TGCAGTAGCTGA	220	3,1,2,1
Lib10^3 1 ng	TGCAGGGGGCTT		63
Lib10^3 1 ng	TGCAGTGTCACG	TCCAGTGTCACG,TGCACTGTCACG	282	1,1
Lib10^3 1 ng	TGCATTACTATT	AGCATTACTATT,GGCATTACTATT	219	1,1
Lib10^3 1 ng	TGCCAGCCCATC	TGCCGGCCCATC	128	1
Lib10^3 1 ng	TGCCGGTTCAGT	TGCCGGATCAGT,TGCCGGTGCAGT,TGCCGGTTCAGC,TGCCGGTTCCGT,TGCCGGTTCTGT,TGCCGTTTCAGT,TGCGGGTTCAGT,TGTCGGTTCAGT	279	1,2,1,1,1,1,1,1
Lib10^3 1 ng	TGCCGTATGGGG	AGCCGTATGGGG,TGCCGTAAGGGG,TGGCGTATGGGG	299	1,1,1
Lib10^3 1 ng	TGCCTATGTCCA	TACCTATGTCCA,TGCCTATGCCCA,TGCCTTTGTCCA,TGTCTATGTCCA	331	2,2,1,1
Lib10^3 1 ng	TGCCTCGTTAGT	TGCCTCGATAGT,TGCCTCGTTCGT,TGCCTNGTTAGT,TTCCTCGTTAGT	331	1,1,1,1
Lib10^3 1 ng	TGCCTCTCGTGT	AGCCTCTCGTGT,CGCCTCTCGTGT,TGCCTCTCGAGT,TGCCTCTCGTGC,TGCCTTTCGTGT,TGCNTCTCGTGT,TGTCTCTCGTGT	334	2,1,2,1,1,1,1
Lib10^3 1 ng	TGCCTGGCTTTG	TGCCTGGCGTTG,TGCCTGGCTTTA	153	1,1
Lib10^3 1 ng	TGCCTGGTAACT	TGCCTGATAACT,TGCCTGGNAACT,TGCCTGGTACCT,TGCCTGGTATCT,TGCCTNGTAACT,TGGCTGGTAACT	125	1,1,1,1,2,1
Lib10^3 1 ng	TGCCTGTGGAGT	TGCATGTGGAGT,TGCCTATGGAGT,TGCCTGAGGAGT,TGCCTGCGGAGT,TGCCTGGGGAGT,TGCCTGTGGAGG,TGCCTGTGGCGT,TGCCTGTGGGGT,TGCCTGTGGTGT,TGCCTGTTGAGT	252	1,2,3,1,1,2,1,4,3,1
Lib10^3 1 ng	TGCCTTTGTCAT	TACCTTTGTCAT,TGCCTATGTCAT,TGCCTTTGGCAT,TGCCTTTGTCTT	249	1,1,1,1
Lib10^3 1 ng	TGCGCGCTCATT	TGCGCCCTCATT,TGCGCGCTCAAT,TGCGCGCTCGTT,TGCGCGNTCATT,TGGGCGCTCATT	292	1,1,1,2,1
Lib10^3 1 ng	TGCGGAAAGAGT	TGCGGGAAGAGT	37	1
Lib10^3 1 ng	TGCGGATGTGAT	TGCGCATGTGAT,TGCGGATGTGGT,TGCGGGTGTGAT,TGCGGTTGTGAT	274	1,1,1,3
Lib10^3 1 ng	TGCGGGGTTCTA	TGCGGGGGTCTA,TGCGGGGTTATA,TGCGGGGTTCCA,TGCGGTGTTCTA,TGCGTGGTTCTA,TGGGGGGTTCTA	418	1,1,1,2,1,1
Lib10^3 1 ng	TGCGGTGATTGT	TGCGGTGATAGT,TGCTGTGATTGT	204	1,2
Lib10^3 1 ng	TGCGGTGTTTTG	CGCGGTGTTTTG,TGCCGTGTTTTG,TGCGGTGATTTG,TGCGGTGTTATG,TGCGGTGTTCTG,TGCGGTGTTTTA	197	1,1,1,1,1,1
Lib10^3 1 ng	TGCGTGGCCTGT	TGCGGGGCCTGT,TGCGTTGCCTGT	80	1,1
Lib10^3 1 ng	TGCTACTTTGCC	TGCTACTTTGAC,TGCTACTTTGTC	109	1,1
Lib10^3 1 ng	TGCTAGGGCTGG	TACTAGGGCTGG,TGCTAAGGCTGG,TGCTAGGGGTGG,TGCTAGTGCTGG,TGCTANGGCTGG,TGCTTGGGCTGG	232	1,1,1,1,1,1
Lib10^3 1 ng	TGCTATTGGATT	TGCTAGTGGATT,TGCTATTGAATT	226	1,2
Lib10^3 1 ng	TGCTATTGTGCT	TGCTATGGTGCT,TGCTATTTTGCT	273	1,1
Lib10^3 1 ng	TGCTCGCCGACT	AGCTCGCCGACT,TCCTCGCCGACT,TGCACGCCGACT,TGCTCGCCGAGT,TGCTCGCCGCCT,TGCTCGCCGGCT,TGCTCGCCGTCT,TGCTCGTCGACT	269	1,1,1,1,3,3,1,1
Lib10^3 1 ng	TGCTGCATAGGG	TGCTGAATAGGG,TGCTGCATACGG,TGCTGCATAGGA,TGCTGCNTAGGG	166	1,1,1,2
Lib10^3 1 ng	TGCTGCCAGGTG	TACTGCCAGGTG,TGCTCCCAGGTG,TGCTGCCAGCTG,TGCTGCTAGGTG	58	1,1,1,1
Lib10^3 1 ng	TGCTGCTTCGTG	CGCTGCTTCGTG,TGCTGCTNCGTG,TGCTGCTTCATG,TGCTGCTTCGGG,TGCTGTTTCGTG	264	210,1,1,1,1
Lib10^3 1 ng	TGCTGGCGTTGA	TGCCGGCGTTGA,TGCTGGCGTAGA,TGCTGGCGTGGA,TGCTGGCGTTGG,TGCTGGCGTTGT,TGCTGGGGTTGA	269	1,8,2,2,4,1
Lib10^3 1 ng	TGCTGTACCGTC	TGCTGCACCGTC,TGCTGTACCCTC,TGCTGTACCGAC,TGCTGTACCGCC,TGTTGTACCGTC	276	1,1,1,1,1
Lib10^3 1 ng	TGCTGTCGTATG	GGCTGTCGTATG,TACTGTCGTATG,TGCTGACGTATG,TGCTGCCGTATG,TGCTGTCGGATG	257	1,1,1,1,1
Lib10^3 1 ng	TGCTTAACGAAT		135
Lib10^3 1 ng	TGCTTATTTGAT	TGCATATTTGAT,TGCTTATTTGAA	113	1,1
Lib10^3 1 ng	TGCTTCCTCGAG	CGCTTCCTCGAG,TGCTCCCTCGAG,TGCTNCCTCGAG,TGCTTCCTAGAG,TGCTTCCTCCAG,TGCTTCCTCGGG,TGCTTCCTCGTG,TGGTTCCTCGAG	212	1,1,1,1,1,9,12,185
Lib10^3 1 ng	TGCTTCTCAGGG		67
Lib10^3 1 ng	TGCTTTTTGTAG	TGCTTTNTGTAG,TGCTTTTTGGAG,TGCTTTTTGTAC	214	1,1,1
Lib10^3 1 ng	TGGAAGACTATT	TGGAAGGCTATT,TGGGAGACTATT,TGGTAGACTATT	134	1,2,1
Lib10^3 1 ng	TGGAATTTGTAT	AGGAATTTGTAT,TCGAATTTGTAT,TGCAATTTGTAT,TGGGATTTGTAT	241	1,2,1,1
Lib10^3 1 ng	TGGAGCTGTCTT	TGGTGCTGTCTT	68	1
Lib10^3 1 ng	TGGATGCATGCG	TGGATGCATACG,TGGATGCATGTG,TGGATGCCTGCG,TGGATNCATGCG,TGGCTGCATGCG,TGGTTGCATGCG	228	1,1,1,1,1,1
Lib10^3 1 ng	TGGATTAGTTAA	TGAATTAGTTAA	25	1
Lib10^3 1 ng	TGGATTGTACTT	TGGATTGTAGTT,TGGATTGTGCTT,TGGGTTGTACTT	198	1,1,1
Lib10^3 1 ng	TGGATTTGCAGA	GGGATTTGCAGA,TGCATTTGCAGA,TGGATTTGCAGG,TGGATTTGCAGT,TGGATTTGCTGA,TGGGTTTGCAGA,TGGTTTTGCAGA,TGTATTTGCAGA	290	1,1,1,5,1,1,1,1
Lib10^3 1 ng	TGGCAGGCTTGT	AGGCAGGCTTGT,GGGCAGGCTTGT,TGGCANGCTTGT,TGGCTGGCTTGT	273	1,2,1,1
Lib10^3 1 ng	TGGCATACTTTC	TGGCATACTATC,TGGCATACTTAC,TGGCATACTTTG,TGGCTTACTTTC,TGGGATACTTTC	172	1,1,1,1,1
Lib10^3 1 ng	TGGCATTTCGGT	GGGCATTTCGGT,TGGCAATTCGGT,TGGCATGTCGGT,TGGCATNTCGGT,TGGCATTTCTGT	309	1,1,2,1,1
Lib10^3 1 ng	TGGCCCCATTTT	TGGNCCCATTTT,TNGCCCCATTTT	147	1,1
Lib10^3 1 ng	TGGCGCCAGTTC	TAGCGCCAGTTC,TGACGCCAGTTC,TGCCGCCAGTTC,TGGCGCCAGATC,TGGCGCCAGTAC,TGGCGCCCGTTC,TGGCGCCTGTTC,TGTCGCCAGTTC	357	1,1,1,1,1,1,1,1
Lib10^3 1 ng	TGGCTAAGACTC	TCGCTAAGACTC,TGGCTAAGGCTC,TGGCTAAGTCTC,TGGCTAGGACTC,TGGCTANGACTC	286	1,2,1,1,1
Lib10^3 1 ng	TGGCTCGCATTT	AGGCTCGCATTT,CGGCTCGCATTT,TGGCCCGCATTT,TGGCTGGCATTT,TGGCTTGCATTT	275	1,1,1,1,1
Lib10^3 1 ng	TGGCTCGGGGGG	AGGCTCGGGGGG,TGGCCCGGGGGG,TGGCTCCGGGGG,TGGCTCGGAGGG,TGGCTCGGGGAG,TGGCTCGGGGGC,TGGCTCGGGGGT,TGGCTCGTGGGG,TGGCTCNGGGGG	364	1,1,1,1,1,1,1,1,1
Lib10^3 1 ng	TGGCTGCCGCGT	TGGCTGCCGGGT	125	1
Lib10^3 1 ng	TGGGAGAGTTTG	TGGGAGCGTTTG,TGGGAGGGTTTG,TGGGGGAGTTTG,TGGGTGAGTTTG	151	1,2,1,1
Lib10^3 1 ng	TGGGATTCATTA	TGGAATTCATTA,TGGGATNCATTA,TGGGATTCATAA,TGGGATTGATTA,TGGGATTNATTA	283	1,1,1,1,1
Lib10^3 1 ng	TGGGGACTTTCG	TGCGGACTTTCG,TGGGGACTTTCA,TGGGGGCTTTCG,TGGGGTCTTTCG	251	1,1,1,4
Lib10^3 1 ng	TGGGGAGGATGG	TCGGGAGGATGG,TGGGGAGGAGGG,TGGGGAGGGTGG,TGGGGCGGATGG,TGGGGGGGATGG,TGGGGTGGATGG,TGTGGAGGATGG	249	1,1,4,1,1,2,1
Lib10^3 1 ng	TGGGGATGTTCT	TAGGGATGTTCT,TGGGGATGATCT,TGGGGATGGTCT,TGGGGGTGTTCT	193	1,2,1,1
Lib10^3 1 ng	TGGGGCTTTGTT	TGGGGCATTGTT,TGGGGCTCTGTT,TGGGGCTTAGTT,TGGGGCTTGGTT,TGGGGCTTTATT,TGGGGCTTTCTT,TGGGGTTTTGTT	257	1,1,1,1,1,1,1
Lib10^3 1 ng	TGGGGGGTCTCC	TCGGGGGTCTCC,TGGGGGTTCTCC	216	1,1
Lib10^3 1 ng	TGGGGGTGACTT	CGGGGGTGACTT,TCGGGGTGACTT,TGGAGGTGACTT,TGGGGGAGACTT,TGGGGGCGACTT,TGGGGGTGACTC,TGGGGGTGGCTT,TGGGGGTGTCTT,TGGGGGTNACTT	262	1,1,2,1,1,1,1,1,1
Lib10^3 1 ng	TGGGGTTTGAGG	TGGGGATTGAGG,TGGGGTTCGAGG,TGGGGTTTGGGG,TGGGGTTTGTGG,TGTGGTTTGAGG	133	1,1,3,2,1
Lib10^3 1 ng	TGGGTAGTAACC	AGGGTAGTAACC,TCGGTAGTAACC,TGAGTAGTAACC,TGGCTAGTAACC,TGGGAAGTAACC,TGGGGAGTAACC,TGGGTAATAACC,TGGGTAGCAACC,TGGGTAGGAACC,TGGGTAGTAGCC,TGGGTAGTATCC,TGGGTAGTTACC,TGGGTNGTAACC,TGGGTTGTAACC	532	1,1,2,3,1,1,1,1,2,2,1,1,1,1
Lib10^3 1 ng	TGGGTGTAATCC	TGGGTGTAAACC,TGGGTGTAAGCC,TGGGTGTAGTCC,TGGGTGTNATCC,TGGNTGTAATCC,TGTGTGTAATCC	233	2,1,1,1,1,1
Lib10^3 1 ng	TGGGTTAGCCTA	TGGGTTTGCCTA,TGGNTTAGCCTA	115	1,1
Lib10^3 1 ng	TGGGTTATTTCG	AGGGTTATTTCG,TGGGGTATTTCG,TGGGTGATTTCG	205	1,2,1
Lib10^3 1 ng	TGGTAGGTGGTT	GGGTAGGTGGTT,TGGTAGGAGGTT,TGGTAGGCGGTT,TGGTAGGTGGAT,TGGTAGGTGGTC,TGGTAGGTGGTG,TTGTAGGTGGTT	211	1,1,1,3,1,1,1
Lib10^3 1 ng	TGGTAGTGTTTT	TAGTAGTGTTTT,TCGTAGTGTTTT,TGGTAGGGTTTT,TGGTAGTGTCTT,TGGTAGTGTTTA,TGGTAGTGTTTG,TGGTANTGTTTT,TGGTTGTGTTTT	248	2,1,1,1,2,1,1,1
Lib10^3 1 ng	TGGTATGGCTGG	TGATATGGCTGG,TGGCATGGCTGG,TGGTATGGCAGG,TGGTATGGCTGA	329	1,1,1,2
Lib10^3 1 ng	TGGTCGTCCGGT		127
Lib10^3 1 ng	TGGTCTGTTGAT	TAGTCTGTTGAT	174	1
Lib10^3 1 ng	TGGTGCCGATGG	TGGTCCCGATGG,TGGTGCCCATGG,TGGTGCCGAAGG,TGGTGCCGTTGG	340	1,1,1,1
Lib10^3 1 ng	TGGTGTGCCACT	GGGTGTGCCACT,TCGTGTGCCACT,TGATGTGCCACT,TGGAGTGCCACT,TGGTGTGCCTCT,TGGTGTGTCACT	426	1,1,1,1,1,1
Lib10^3 1 ng	TGGTTAGTAGGC	TAGTTAGTAGGC,TGCTTAGTAGGC,TGGGTAGTAGGC,TGGNTAGTAGGC,TGGTTAGGAGGC,TGGTTAGTAAGC,TGGTTAGTACGC,TGGTTAGTAGCC,TGGTTAGTAGTC,TGGTTAGTGGGC,TGGTTTGTAGGC	226	1,1,1,1,1,1,1,1,1,1,1
Lib10^3 1 ng	TGGTTCCGTCCG	TCGTTCCGTCCG,TGCTTCCGTCCG,TGGATCCGTCCG,TGGTTCCGTCAG,TGGTTCNGTCCG,TGGTTCTGTCCG,TGTTTCCGTCCG	330	1,1,1,1,1,1,1
Lib10^3 1 ng	TGGTTGATTGGA	GGGTTGATTGGA,TGGGTGATTGGA,TGGTTGATCGGA,TGGTTGATTGGC,TGGTTGATTGGG,TGGTTGATTGGT,TGGTTGGTTGGA	283	1,1,1,1,1,2,1
Lib10^3 1 ng	TGGTTTTTGGCA	AGGTTTTTGGCA,TCGTTTTTGGCA,TGCTTTTTGGCA,TGGGTTTTGGCA,TGGTTTNTGGCA,TGGTTTTAGGCA,TGGTTTTTGGCT,TGGTTTTTGGGA,TGGTTTTTGGTA,TGTTTTTTGGCA	370	2,1,1,1,1,1,1,1,1,1
Lib10^3 1 ng	TGTAACATGTGG	TGAAACATGTGG,TGCAACATGTGG,TGGAACATGTGG,TGTAACATGAGG,TGTAACATGGGG,TGTAACATGTGC,TGTAATATGTGG,TGTACCATGTGG,TGTAGCATGTGG,TGTGACATGTGG,TGTTACATGTGG	302	1,1,1,1,1,1,1,1,1,1,1
Lib10^3 1 ng	TGTAACTGTGCT	TGAAACTGTGCT,TGTAACTGAGCT,TGTAACTGGGCT,TGTAACTGTACT,TGTAACTGTGTT,TGTAGCTGTGCT	294	1,1,1,1,1,1
Lib10^3 1 ng	TGTAAGTTTGAT	AGTAAGTTTGAT,TGTAACTTTGAT,TGTAAGCTTGAT,TGTAAGNTTGAT,TGTAAGTTGGAT,TGTAAGTTTCAT,TGTAAGTTTGAA,TGTAAGTTTGAG,TGTAAGTTTGCT,TGTAAGTTTGGT,TGTAAGTTTGTT,TGTAANTTTGAT,TGTAATTTTGAT	556	1,1,3,1,1,1,1,1,1,6,5,1,1
Lib10^3 1 ng	TGTACACAGCAT	TGTACACAGCGT,TGTACANAGCAT,TGTACNCAGCAT,TGTACTCAGCAT	175	1,1,1,1
Lib10^3 1 ng	TGTAGCTTTCTT	TGCAGCTTTCTT,TGTAGCTTTGTT	228	1,1
Lib10^3 1 ng	TGTAGTTACTAT	TATAGTTACTAT,TGGAGTTACTAT	231	1,2
Lib10^3 1 ng	TGTATTTCGCCG	TCTATTTCGCCG,TGTATNTCGCCG,TGTATTTCGGCG,TGTATTTCGTCG	370	1,1,1,2
Lib10^3 1 ng	TGTCATGGACGG	TGACATGGACGG,TGTCAAGGACGG,TGTCATGGACGC,TGTCATGGGCGG,TGTCATGGTCGG,TGTCATGNACGG,TGTCATGTACGG,TGTCATNGACGG	158	2,1,2,1,3,1,2,1
Lib10^3 1 ng	TGTCCGTGGCAG	AGTCCGTGGCAG,TGTCCGTGGCGG,TGTCCGTGGCTG,TGTCCTTGGCAG	178	1,2,1,1
Lib10^3 1 ng	TGTCCTACTTGT	AGTCCTACTTGT,TGTCCTACTTGA,TGTCCTACTTGC	227	1,1,1
Lib10^3 1 ng	TGTCTGACGTTT	TATCTGACGTTT,TGACTGACGTTT,TGGCTGACGTTT,TGTCTGACATTT,TGTCTGACGCTT,TGTCTGACGTGT,TGTCTGANGTTT,TGTCTGGCGTTT,TGTCTGNCGTTT,TGTCTGTCGTTT	283	1,1,1,1,1,1,1,1,1,4
Lib10^3 1 ng	TGTCTGCATAAG	TGACTGCATAAG,TGTCTGCATACG	73	1,1
Lib10^3 1 ng	TGTCTGGCACTG	AGTCTGGCACTG,TGTCTGGCACTA,TGTCTGGCACTC,TGTCTGGCCCTG,TGTCTNGCACTG	252	1,1,1,1,1
Lib10^3 1 ng	TGTCTGGCGGAA	TGACTGGCGGAA,TGTCTGGCGAAA,TGTCTGGCGGCA,TGTCTGGCGGGA,TGTCTGGCGGTA,TGTCTGGGGGAA,TGTCTNGCGGAA	218	1,1,1,1,1,1,1
Lib10^3 1 ng	TGTCTTGAAGCT	TATCTTGAAGCT,TGTCTTGAAACT,TGTCTTGCAGCT,TGTCTTGGAGCT,TGTCTTGTAGCT	172	1,1,2,3,3
Lib10^3 1 ng	TGTCTTTGTTTC	TGTCTTAGTTTC	69	1
Lib10^3 1 ng	TGTCTTTTCGGA	TGGCTTTTCGGA,TGTCTTTCCGGA,TGTCTTTTCGCA	229	1,1,1
Lib10^3 1 ng	TGTGAAAGGCTT	AGTGAAAGGCTT,TGGGAAAGGCTT,TGTCAAAGGCTT,TGTGAAAAGCTT,TGTGAAAGGCAT,TGTGAAANGCTT,TGTGAATGGCTT,TGTGATAGGCTT	195	1,1,1,1,1,1,1,1
Lib10^3 1 ng	TGTGACATAGGT	GGTGACATAGGT,TGGGACATAGGT,TGTGACATAGGG,TGTGACNTAGGT,TGTGCCATAGGT,TGTGGCATAGGT,TGTGTCATAGGT	218	1,1,3,1,1,1,2
Lib10^3 1 ng	TGTGATGAATAT	GGTGATGAATAT,TGTGATGAACAT,TGTGATGTATAT	61	1,1,1
Lib10^3 1 ng	TGTGATGCCCCA	TGTGATGCCCCC,TGTGATGGCCCA,TGTGGTGCCCCA,TGTNATGCCCCA	184	1,1,2,1
Lib10^3 1 ng	TGTGATGTAACG	TGTGATGGAACG,TGTGATGTAGCG,TGTGGTGTAACG,TGTGTTGTAACG	198	1,1,1,1
Lib10^3 1 ng	TGTGCAACTCAT	GGTGCAACTCAT,TGAGCAACTCAT,TGGGCAACTCAT,TGTGCAACTTAT,TGTGCAAGTCAT	130	1,1,1,1,1
Lib10^3 1 ng	TGTGCTAATTGG	TGTGCTAAATGG,TGTGCTAAGTGG,TGTGCTAATAGG,TGTGCTANTTGG,TGTGGTAATTGG	367	1,1,1,1,1
Lib10^3 1 ng	TGTGGGTGGCAT	TGTGCGTGGCAT,TGTGGGGGGCAT,TGTGGGTGGAAT	152	1,1,1
Lib10^3 1 ng	TGTGGTTTTACT	TATGGTTTTACT,TGAGGTTTTACT,TGGGGTTTTACT,TGTGGTTNTACT	239	1,1,2,1
Lib10^3 1 ng	TGTGTAATTTTC	TGAGTAATTTTC,TGGGTAATTTTC,TGTGTAAATTTC,TGTGTAACTTTC,TGTGTAATTGTC,TGTGTAATTTAC,TGTGTAATTTTA	224	1,1,1,1,1,1,1
Lib10^3 1 ng	TGTGTGAAATAT	TGTGTCAAATAT,TGTGTGGAATAT,TGTGTGTAATAT	252	1,1,3
Lib10^3 1 ng	TGTGTGTTTATC	TGAGTGTTTATC,TGTGCGTTTATC,TGTGTGTTTCTC	197	1,1,1
Lib10^3 1 ng	TGTGTTTTTTTT	TGTGTTTTATTT	82	1
Lib10^3 1 ng	TGTTAATGGTTC	TATTAATGGTTC,TGCTAATGGTTC,TGTGAATGGTTC,TGTTAATGGTCC,TGTTAATNGTTC	197	1,1,1,1,1
Lib10^3 1 ng	TGTTAATTAGTT	AGTTAATTAGTT	146	1
Lib10^3 1 ng	TGTTACGTTAGA	TGATACGTTAGA,TGCTACGTTAGA,TGTTACGTTAGC,TGTTACGTTAGG,TGTTANGTTAGA,TGTTATGTTAGA	214	2,1,1,1,1,1
Lib10^3 1 ng	TGTTAGCAATGT	AGTTAGCAATGT,TGATAGCAATGT,TGTCAGCAATGT,TGTGAGCAATGT,TGTTANCAATGT	211	1,1,1,1,1
Lib10^3 1 ng	TGTTCCTGACCT	GGTTCCTGACCT,TGATCCTGACCT,TGTACCTGACCT,TGTTCCTGGCCT,TGTTCCTGTCCT,TGTTGCTGACCT	284	1,1,2,1,7,1
Lib10^3 1 ng	TGTTGATATTAT	TGATGATATTAT,TGGTGATATTAT,TGTTGATNTTAT,TGTTGCTATTAT,TGTTGGTATTAT	296	1,1,1,1,3
Lib10^3 1 ng	TGTTGATTACTT	TGTTGGTTACTT,TGTTGTTTACTT	145	2,3
Lib10^3 1 ng	TGTTGTAGTTTT	TGTAGTAGTTTT,TGTTGTAATTTT,TGTTGTAGTGTT	118	1,1,1
Lib10^3 1 ng	TGTTTCTCGTTA	GGTTTCTCGTTA,TGGTTCTCGTTA,TGTTCCTCGTTA,TGTTTCNCGTTA,TGTTTCTNGTTA,TGTTTCTTGTTA	335	1,1,1,1,1,1
Lib10^3 1 ng	TGTTTGTTAGTG	TGATTGTTAGTG,TGCTTGTTAGTG,TGTTTGATAGTG,TGTTTGGTAGTG,TGTTTGTTACTG,TGTTTGTTAGGG,TGTTTGTTAGTT,TGTTTGTTGGTG	284	1,1,1,1,1,2,1,1
Lib10^3 1 ng	TGTTTTAAGGAC	AGTTTTAAGGAC,TCTTTTAAGGAC,TGATTTAAGGAC,TGGTTTAAGGAC,TGTCTTAAGGAC,TGTGTTAAGGAC,TGTTTTAAGCAC,TGTTTTAAGGTC,TGTTTTAAGTAC,TGTTTTATGGAC	311	1,1,2,1,1,1,1,2,1,1
Lib10^3 1 ng	TTAAGGAGTGTT	TTAAGCAGTGTT,TTAAGGAGGGTT,TTAAGGGGTGTT,TTAGGGAGTGTT,TTATGGAGTGTT	174	1,1,1,1,1
Lib10^3 1 ng	TTAAGTGGATTA	TTAAGTGGGTTA	149	1
Lib10^3 1 ng	TTAAGTTATTAG	TTAAGTTATTTG	195	2
Lib10^3 1 ng	TTAATATCATTG	TTCATATCATTG	258	1
Lib10^3 1 ng	TTAATGAATCTG	TAAATGAATCTG,TTAATGAACCTG,TTAATGTATCTG	43	1,1,1
Lib10^3 1 ng	TTAATTAGGAAT	GTAATTAGGAAT,TTAATTANGAAT,TTACTTAGGAAT	217	1,1,1
Lib10^3 1 ng	TTAATTTGTCCG	TTATTTTGTCCG	163	1
Lib10^3 1 ng	TTACCACCGAGA	TTACCACCGAGC,TTACCACCGAGG,TTACCACCGAGT,TTACCACCGCGA,TTACCACCGGGA,TTACCACCGTGA,TTACCACTGAGA,TTTCCACCGAGA	342	1,2,1,2,5,9,1,1
Lib10^3 1 ng	TTACCCCATTTA	TTACCCCATCTA,TTACCCCNTTTA,TTACCTCATTTA	183	1,1,2
Lib10^3 1 ng	TTACGGATTTGC	GTACGGATTTGC,TTACGGATATGC,TTACGGTTTTGC,TTACGNATTTGC	275	1,1,2,1
Lib10^3 1 ng	TTACGGTTTCTT		150
Lib10^3 1 ng	TTACGTGGTAAG	TTACCTGGTAAG,TTACGGGGTAAG,TTACGNGGTAAG,TTACGTGGTAGG,TTACGTGGTATG,TTAGGTGGTAAG	287	1,1,1,3,6,1
Lib10^3 1 ng	TTACTCCTGGCT	TTACGCCTGGCT,TTACTCCTGGGT,TTACTCNTGGCT,TTACTGCTGGCT	310	1,1,1,1
Lib10^3 1 ng	TTACTCTGGACT	TTAATCTGGACT,TTACTCTGGTCT,TTACTCTGTACT	307	1,5,1
Lib10^3 1 ng	TTACTTAGCAGG	TTACTTAGCAGA,TTACTTAGCCGG,TTACTTAGCTGG,TTANTTAGCAGG	230	1,1,4,1
Lib10^3 1 ng	TTACTTTCGGAC	TTACTATCGGAC,TTACTCTCGGAC,TTACTTGCGGAC,TTACTTTCGCAC,TTACTTTCGGGC,TTACTTTCGGTC,TTACTTTTGGAC,TTANTTTCGGAC	309	1,1,1,4,3,2,1,1
Lib10^3 1 ng	TTACTTTTAGGC	TTACTTATAGGC,TTACTTTAAGGC,TTAGTTTTAGGC	247	1,1,1
Lib10^3 1 ng	TTAGACTATTAT	CTAGACTATTAT,TTAGACAATTAT,TTAGACTATAAT,TTAGACTATTAC,TTAGACTNTTAT,TTAGGCTATTAT,TTAGTCTATTAT	264	1,1,1,1,1,2,3
Lib10^3 1 ng	TTAGAGATTAGA	TAAGAGATTAGA,TTAGAGACTAGA,TTAGAGATTAAA,TTAGAGATTAGG,TTAGAGATTAGT,TTAGAGATTTGA,TTAGTGATTAGA,TTCGAGATTAGA	199	1,1,1,2,1,1,3,1
Lib10^3 1 ng	TTAGGGAACTTC	TTAGGGAACATC,TTAGGGGACTTC	156	1,1
Lib10^3 1 ng	TTAGTCATCGGT	CTAGTCATCGGT,TTAGTCACCGGT,TTAGTCATCGGG,TTAGTCCTCGGT,TTAGTCTTCGGT,TTAGTNATCGGT,TTAGTTATCGGT	403	1,2,2,1,1,1,1
Lib10^3 1 ng	TTAGTGTAGCTT	GTAGTGTAGCTT,TGAGTGTAGCTT,TTAGTGTAGCCT,TTAGTGTTGCTT	349	1,1,2,3
Lib10^3 1 ng	TTAGTGTCAACG	TTAGTGACAACG,TTAGTGTCACCG,TTAGTGTCATCG,TTAGTNTCAACG	296	1,1,1,1
Lib10^3 1 ng	TTAGTGTTATTT	TTACTGTTATTT,TTAGTGTNATTT	89	1,1
Lib10^3 1 ng	TTAGTTTGGATT	TTACTTTGGATT,TTAGTATGGATT,TTAGTTTGCATT,TTAGTTTGGATA,TTAGTTTGGCTT,TTAGTTTGGTTT	201	1,1,1,1,1,1
Lib10^3 1 ng	TTATAAATTCAC		115
Lib10^3 1 ng	TTATAGTGTTAG	TTATAGAGTTAG,TTATAGTGATAG,TTATAGTGTAAG,TTATAGTGTTTG,TTATTGTGTTAG	163	1,1,1,1,1
Lib10^3 1 ng	TTATGGGGGCAC	GTATGGGGGCAC,TTAAGGGGGCAC,TTATCGGGGCAC,TTATGCGGGCAC,TTATGGGGGCAG	239	1,1,1,1,1
Lib10^3 1 ng	TTATGGTTAGGA	ATATGGTTAGGA,TGATGGTTAGGA,TTAAGGTTAGGA,TTATGATTAGGA,TTATGGTGAGGA,TTATGGTTAGCA,TTATGGTTAGGG,TTATGGTTAGGT,TTATGGTTTGGA	336	1,1,1,1,1,1,4,2,1
Lib10^3 1 ng	TTATTGTGGGGT	TTATTGTGCGGT,TTATTGTGGGGG,TTATTGTGTGGT	168	1,1,1
Lib10^3 1 ng	TTATTTCTTGTT	ATATTTCTTGTT,TTATGTCTTGTT,TTATTNCTTGTT,TTATTTCTTGGT,TTATTTNTTGTT	256	1,1,1,1,1
Lib10^3 1 ng	TTATTTGTCGGC	ATATTTGTCGGC,TTATTTGTCGCC	191	1,1
Lib10^3 1 ng	TTCATCAACTCC	ATCATCAACTCC,TCCATCAACTCC,TTCACCAACTCC,TTCATCAACTTC,TTCATCNACTCC,TTCATCTACTCC,TTCATGAACTCC	324	1,1,1,1,1,1,1
Lib10^3 1 ng	TTCATCATGAGC	TTCATCATAAGC,TTCATCATGAAC,TTCATCATGTGC	282	1,1,3
Lib10^3 1 ng	TTCATCTTCTTA	TTCATCNTCTTA	241	1
Lib10^3 1 ng	TTCATGTCTCGC	ATCATGTCTCGC	171	1
Lib10^3 1 ng	TTCCACGTGTTC	TTCCACATGTTC,TTCCACGGGTTC,TTCCACGTGGTC,TTCCACGTGTTG,TTCCATGTGTTC,TTGCACGTGTTC	321	1,1,1,1,1,1
Lib10^3 1 ng	TTCCATAATAGG	TTCCATAATTGG	201	2
Lib10^3 1 ng	TTCCCTCGTAAC	TTCCCTAGTAAC,TTCCCTCCTAAC,TTCCCTCGTCAC	96	1,1,1
Lib10^3 1 ng	TTCCGAGCGGCC	ATCCGAGCGGCC,TTCCGACCGGCC,TTCCGCGCGGCC,TTCCGGGCGGCC,TTCCGTGCGGCC,TTCNGAGCGGCC,TTTCGAGCGGCC	292	1,1,1,4,7,1,1
Lib10^3 1 ng	TTCCGAGGAGGC	ATCCGAGGAGGC,CTCCGAGGAGGC,TTCCGAGCAGGC,TTCCGAGGAGAC,TTCCGAGGAGGT,TTCCGAGGGGGC,TTCCGAGGTGGC,TTCCGCGGAGGC,TTCCGGGGAGGC,TTCCGTGGAGGC	383	1,1,1,1,1,3,3,2,2,5
Lib10^3 1 ng	TTCCGTCTGGGG	TTCTGTCTGGGG	47	1
Lib10^3 1 ng	TTCCTGGCTTTT		64
Lib10^3 1 ng	TTCCTTGTTGTT	GTCCTTGTTGTT,TTCCTTGATGTT,TTCCTTGTTGGT,TTGCTTGTTGTT	293	1,2,2,1
Lib10^3 1 ng	TTCGAGTTTATC	TACGAGTTTATC,TTCGAGTNTATC,TTCGAGTTTCTC,TTCGCGTTTATC,TTCGGGTTTATC,TTCGTGTTTATC,TTCTAGTTTATC	273	1,1,1,1,2,4,1
Lib10^3 1 ng	TTCGCATTGTGG	TTCCCATTGTGG	41	1
Lib10^3 1 ng	TTCGGCTAACGG	TTCGGCTAACGC,TTCGGCTATCGG,TTCGTCTAACGG	130	1,1,1
Lib10^3 1 ng	TTCGGTCGGTGT	TTCAGTCGGTGT,TTCGGTCGGGGT,TTCGGTCGGTGG	95	1,1,1
Lib10^3 1 ng	TTCGTCGGTTTT	TTCGTCGCTTTT,TTCGTCGGATTT,TTCGTCGGGTTT,TTCGTCTGTTTT,TTCGTGGGTTTT	237	1,3,2,1,1
Lib10^3 1 ng	TTCGTGAATTGT	TTCGAGAATTGT,TTCGTGACTTGT,TTTGTGAATTGT	225	1,1,1
Lib10^3 1 ng	TTCGTTTTTTGT	TACGTTTTTTGT,TCCGTTTTTTGT,TTCGTCTTTTGT,TTCGTGTTTTGT,TTCGTTTATTGT,TTCGTTTTTTGG	219	1,1,2,1,1,1
Lib10^3 1 ng	TTCTCCTATGAT	TACTCCTATGAT,TTCTCCTATGAC,TTCTCCTATGCT,TTCTCCTATGGT,TTCTCCTATGTT	230	1,1,1,1,2
Lib10^3 1 ng	TTCTCGACTGGA	ATCTCGACTGGA,TACTCGACTGGA,TTCACGACTGGA,TTCNCGACTGGA,TTCTCGACTAGA,TTCTCGACTGGG,TTCTCGACTGGT,TTCTCGACTGTA,TTCTCGCCTGGA,TTCTCGTCTGGA	339	2,1,1,1,2,3,3,1,1,5
Lib10^3 1 ng	TTCTGCCTAGTT	TTCAGCCTAGTT,TTCTCCCTAGTT,TTCTGCCTAGAT,TTCTGCCTAGGT,TTCTGCCTAGTC	373	1,1,1,2,1
Lib10^3 1 ng	TTCTGCTTGGCT		196
Lib10^3 1 ng	TTCTGGAACTTC		120
Lib10^3 1 ng	TTCTGGACTTTT	GTCTGGACTTTT,TTCTGCACTTTT,TTCTGGACTTTC,TTCTGGAGTTTT,TTCTGGANTTTT,TTCTGGCCTTTT,TTCTGGGCTTTT,TTCTGGTCTTTT	253	1,1,1,1,2,1,1,1
Lib10^3 1 ng	TTCTGTGGACTT	GTCTGTGGACTT,TTCTATGGACTT,TTCTGAGGACTT,TTCTGGGGACTT,TTCTGNGGACTT,TTCTGTGAACTT,TTCTGTGGATTT,TTCTGTGGCCTT,TTCTGTGGGCTT,TTCTGTGGTCTT,TTCTGTGTACTT	559	2,1,2,1,2,1,1,2,4,4,2
Lib10^3 1 ng	TTCTTCGCTTTC	TTCTTCGCCTTC	147	1
Lib10^3 1 ng	TTCTTCGGCTTT		329
Lib10^3 1 ng	TTCTTGCCTGGT	TACTTGCCTGGT,TTCTTGCCTGCT,TTCTTNCCTGGT	212	1,1,1
Lib10^3 1 ng	TTCTTTGTCGGT	TTCTGTGTCGGT,TTCTTTGGCGGT,TTCTTTGTCGCT,TTCTTTGTCGGA	161	1,1,2,2
Lib10^3 1 ng	TTGAAAGGCCAG	TTGAAAGGCCTG,TTGAAANGCCAG,TTGAATGGCCAG,TTGATAGGCCAG,TTGGAAGGCCAG,TTGTAAGGCCAG	336	1,1,1,1,3,3
Lib10^3 1 ng	TTGAAGGTTCTC	TTGAAGCTTCTC,TTGAAGGATCTC,TTGAAGGTTATC,TTGAAGGTTCCC,TTGAAGGTTCTT,TTGAANGTTCTC,TTGATGGTTCTC,TTGTAGGTTCTC	317	1,1,1,1,1,1,1,1
Lib10^3 1 ng	TTGAATCCGGTG	GTGAATCCGGTG,TTGAATCCGATG,TTGAATCCGCTG,TTGAATCCGGCG,TTGAATCCGGGG,TTGACTCCGGTG,TTGGATCCGGTG,TTGTATCCGGTG	248	1,1,1,1,2,2,3,3
Lib10^3 1 ng	TTGAATCTTGAT	TTGAACCTTGAT,TTGAATNTTGAT,TTGAATTTTGAT,TTGATTCTTGAT,TTGGATCTTGAT,TTGTATCTTGAT	236	1,1,1,1,2,1
Lib10^3 1 ng	TTGAATGCGGTA	TTGAATGCGATA,TTGAATGGGGTA,TTGAGTGCGGTA,TTGGATGCGGTA	195	1,1,1,1
Lib10^3 1 ng	TTGAATTTAAAA	TAGAATTTAAAA,TTGCATTTAAAA,TTGGATTTAAAA,TTGTATTTAAAA	277	1,1,1,1
Lib10^3 1 ng	TTGACGTTGTTC	TTGACGTCGTTC,TTGACGTTGTGC	82	1,1
Lib10^3 1 ng	TTGAGCCGATGT	ATGAGCCGATGT,CTGAGCCGATGT,TTGAGCCGTTGT,TTGGGCCGATGT,TTGTGCCGATGT	216	1,1,1,9,5
Lib10^3 1 ng	TTGAGTTGTGTG	TTGAATTGTGTG,TTGAGTTGAGTG,TTGAGTTGCGTG,TTGAGTTGTATG,TTGAGTTGTGAG,TTGAGTTGTGGG,TTGAGTTNTGTG,TTGGGTTGTGTG,TTGTGTTGTGTG	303	1,1,1,1,1,2,1,1,3
Lib10^3 1 ng	TTGAGTTTGACT	GTGAGTTTGACT,TAGAGTTTGACT,TTGAGNTTGACT,TTGAGTGTGACT,TTGAGTTTGAGT,TTGAGTTTGCCT,TTGAGTTTGGCT,TTGAGTTTGTCT,TTGTGTTTGACT	236	1,1,2,1,1,1,1,4,2
Lib10^3 1 ng	TTGATAAGTACC		66
Lib10^3 1 ng	TTGATCGGACGC	TTGAACGGACGC,TTGATCGGGCGC,TTGATCGGTCGC,TTGATCGTACGC,TTGATNGGACGC,TTGGTCGGACGC	279	1,1,2,1,1,1
Lib10^3 1 ng	TTGATGACCACT		45
Lib10^3 1 ng	TTGATGGATAGG	ATGATGGATAGG,TTGATGAATAGG,TTGATGGATAGC,TTGATGGATTGG,TTGATGGNTAGG,TTGATGGTTAGG,TTGATNGATAGG,TTGGTGGATAGG,TTGTTGGATAGG	211	1,1,1,1,1,1,1,1,2
Lib10^3 1 ng	TTGATTATGAAA	ATGATTATGAAA,TAGATTATGAAA,TTGATNATGAAA,TTGATTATGATA,TTGATTATGGAA,TTGATTNTGAAA,TTGGTTATGAAA	306	1,1,1,1,2,1,1
Lib10^3 1 ng	TTGCAAGGCATT	ATGCAAGGCATT,CTGCAAGGCATT,GTGCAAGGCATT,TTGCAAGACATT,TTGCAAGGCATA,TTGCAAGTCATT	317	1,1,3,1,1,2
Lib10^3 1 ng	TTGCAGGTTGAT	ATGCAGGTTGAT,TAGCAGGTTGAT,TTGCAGGATGAT	186	2,1,1
Lib10^3 1 ng	TTGCGAGATTGT	TTGAGAGATTGT,TTGCGCGATTGT,TTGCGGGATTGT,TTGCGTGATTGT,TTGTGAGATTGT	251	1,2,1,1,1
Lib10^3 1 ng	TTGCGCTACTTA	ATGCGCTACTTA,GTGCGCTACTTA,TAGCGCTACTTA,TTGCCCTACTTA,TTGCGCAACTTA,TTGCGCTACATA,TTGCGCTAGTTA,TTGCGCTNCTTA,TTGCGTTACTTA	349	1,1,1,1,1,1,1,1,1
Lib10^3 1 ng	TTGCGGTGTGTG	TTGCGGCGTGTG,TTGCGGTGTGGG,TTGGGGTGTGTG	140	1,1,1
Lib10^3 1 ng	TTGCTTGAAGAT	TTACTTGAAGAT,TTGCTTGAAGTT,TTGCTTGATGAT,TTGTTTGAAGAT	71	1,1,1,1
Lib10^3 1 ng	TTGCTTGAGGGT	TTGCTTGAGGGG,TTGCTTGTGGGT	160	2,1
Lib10^3 1 ng	TTGGACAAGCGA	TTGCACAAGCGA,TTGGACAAGCGG,TTGGACAAGCGT,TTGGACAGGCGA,TTGGACANGCGA,TTGGACATGCGA,TTGGACNAGCGA,TTGGGCAAGCGA,TTGGTCAAGCGA,TTGNACAAGCGA	193	1,1,1,1,1,1,1,2,3,1
Lib10^3 1 ng	TTGGCCTGAGTG	TCGGCCTGAGTG,TTGCCCTGAGTG,TTGGCCTGAGTT,TTGGCCTGGGTG,TTGGCCTGTGTG	286	1,1,1,5,6
Lib10^3 1 ng	TTGGCTCGTTCT	TAGGCTCGTTCT,TTGGCTCGATCT,TTGGCTCGGTCT,TTGGCTCNTTCT,TTGGGTCGTTCT,TTGNCTCGTTCT	238	1,1,2,1,1,1
Lib10^3 1 ng	TTGGCTTCTCGA	TGGGCTTCTCGA,TTGCCTTCTCGA,TTGGCCTCTCGA,TTGGCTNCTCGA,TTGGCTTCTCGG,TTGGCTTCTCGT,TTGGTTTCTCGA	280	1,1,1,2,1,1,1
Lib10^3 1 ng	TTGGGGCGTTCC	TTGGGGCATTCC,TTGGGGCGTGCC,TTGGGGCGTTTC,TTGGGGGGTTCC	96	1,1,1,1
Lib10^3 1 ng	TTGGGGGCGGCC	TTGTGGGCGGCC	141	1
Lib10^3 1 ng	TTGGTGGGATGC	CTGGTGGGATGC,TTGCTGGGATGC,TTGGTCGGATGC	220	1,1,1
Lib10^3 1 ng	TTGGTTAATCGT	TTGGTGAATCGT,TTGGTTAATCAT,TTGGTTAATCGA,TTGGTTANTCGT,TTGGTTCATCGT	294	1,1,1,2,1
Lib10^3 1 ng	TTGGTTCCGCCT	TTGGTTCCCCCT,TTGGTTCCGGCT,TTGGTTTCGCCT	224	1,1,1
Lib10^3 1 ng	TTGTACATGATC	TTGAACATGATC,TTGGACATGATC,TTGTACATGGTC,TTGTACATGTTC,TTGTACTTGATC	199	1,1,3,1,1
Lib10^3 1 ng	TTGTCGGGTGCC	ATGTCGGGTGCC,TCGTCGGGTGCC,TTGGCGGGTGCC,TTGTCGCGTGCC,TTGTCGGGTGGC,TTGTCGNGTGCC,TTGTCGTGTGCC	270	1,1,1,1,2,1,1
Lib10^3 1 ng	TTGTGGACTCGT	TTGTGGCCTCGT,TTGTGGGCTCGT,TTGTGGTCTCGT	207	1,1,4
Lib10^3 1 ng	TTGTGGTGCTAC	TTGAGGTGCTAC,TTGNGGTGCTAC,TTGTGGAGCTAC,TTGTGGTGATAC,TTGTGGTGCGAC,TTGTGGTGCTTC	147	1,1,1,1,1,1
Lib10^3 1 ng	TTGTTCGGGGGT	TTGGTCGGGGGT,TTGTTCGGCGGT,TTGTTCGGGAGT,TTGTTCGGGCGT,TTGTTCGGGGCT,TTGTTCGGGGGA,TTGTTCGGGGGG,TTGTTCGGGTGT,TTGTTCGTGGGT,TTGTTCTGGGGT,TTGTTNGGGGGT	284	1,1,1,1,1,2,2,1,1,1,2
Lib10^3 1 ng	TTGTTCTTTGAG	TTGTTCTATGAG,TTGTTCTTTGCG,TTGTTCTTTGGG,TTGTTCTTTGTG	126	1,2,7,6
Lib10^3 1 ng	TTGTTGACGGCA	ATGTTGACGGCA,CTGTTGACGGCA,TCGTTGACGGCA,TTGATGACGGCA,TTGCTGACGGCA,TTGTAGACGGCA,TTGTTGACGGGA,TTGTTGGCGGCA,TTGTTGTCGGCA,TTGTTNACGGCA,TTGTTTACGGCA	519	1,1,1,2,1,1,1,4,14,1,1
Lib10^3 1 ng	TTGTTGTCGGGG	ATGTTGTCGGGG,TTATTGTCGGGG,TTGGTGTCGGGG,TTGTTGACGGGG,TTGTTGTCGTGG,TTGTTGTCTGGG,TTGTTGTNGGGG	226	1,1,1,1,1,1,1
Lib10^3 1 ng	TTGTTTCACTAT	GTGTTTCACTAT,TTGATTCACTAT,TTGCTTCACTAT,TTGGTTCACTAT,TTGTATCACTAT,TTGTTTCACAAT,TTGTTTCATTAT	267	1,1,1,1,1,1,1
Lib10^3 1 ng	TTGTTTGCCGAC	ATGTTTGCCGAC,TTATTTGCCGAC,TTGATTGCCGAC,TTGTTTGCCGGC,TTGTTTGCCGTC,TTGTTTGGCGAC,TTGTTTGNCGAC	194	1,1,1,1,1,1,1
Lib10^3 1 ng	TTTAAACTGATG	TTAAAACTGATG,TTTAAACTGGTG,TTTAAACTGTTG,TTTAGACTGATG	317	1,8,6,1
Lib10^3 1 ng	TTTAAAGTATGT	TTTAAAGNATGT,TTTAANGTATGT	281	1,1
Lib10^3 1 ng	TTTAACGCAGGT	TGTAACGCAGGT,TTTAACGCACGT,TTTAACGCAGGA,TTTAACGCAGGG,TTTAACGCTGGT,TTTATCGCAGGT	264	1,1,3,1,2,1
Lib10^3 1 ng	TTTAATGTGTGC	TTTAANGTGTGC,TTTAATGNGTGC,TTTAATGTGAGC,TTTAATGTGGGC,TTTAATGTGTAC,TTTAATNTGTGC,TTTACTGTGTGC	266	1,1,1,1,1,1,1
Lib10^3 1 ng	TTTACGGGATAT	GTTACGGGATAT,TATACGGGATAT,TTTACCGGATAT,TTTACGGGGTAT,TTTACGGGTTAT,TTTNCGGGATAT	355	1,1,1,1,1,1
Lib10^3 1 ng	TTTACGTGCTAG	TTTACGTCCTAG,TTTACGTGCTTG	143	1,2
Lib10^3 1 ng	TTTACGTGGCAG	GTTACGTGGCAG,TTTACGTGGCAC,TTTACGTGGCTG	122	1,1,1
Lib10^3 1 ng	TTTAGTAGCATG	TTTAGAAGCATG,TTTAGTAGCCTG,TTTAGTAGCTTG,TTTAGTAGTATG,TTTTGTAGCATG	300	1,1,2,1,1
Lib10^3 1 ng	TTTAGTTGGATA	TTTAGATGGATA,TTTAGGTGGATA,TTTAGTTGGATC	310	1,1,2
Lib10^3 1 ng	TTTATCCCCTGG	TTTACCCCCTGG,TTTATCTCCTGG,TTTTTCCCCTGG	229	1,1,2
Lib10^3 1 ng	TTTATCTATCCC	TTTATCCATCCC,TTTATCNATCCC,TTTATCTTTCCC	265	1,1,1
Lib10^3 1 ng	TTTATGAGGTGT	GTTATGAGGTGT,TGTATGAGGTGT,TTTATGAGATGT,TTTATGAGGGGT,TTTATGAGGTGC,TTTATGGGGTGT,TTTATGTGGTGT,TTTATNAGGTGT	273	1,1,1,1,1,2,3,1
Lib10^3 1 ng	TTTATTATCTTG	GTTATTATCTTG,TTTATCATCTTG,TTTATTACCTTG,TTTATTATCTCG	201	1,1,1,1
Lib10^3 1 ng	TTTCACACCCGG	TCTCACACCCGG,TTTCACACCCCG,TTTCACACCCTG	286	2,1,1
Lib10^3 1 ng	TTTCCCGCGACA	TTTCCCACGACA,TTTCCCGCAACA,TTTCCCGCGTCA	197	1,1,1
Lib10^3 1 ng	TTTCCGATCGGG	ATTCCGATCGGG,TTCCCGATCGGG,TTTCCGATCGAG,TTTCCGCTCGGG,TTTCCGGTCGGG,TTTCCGNTCGGG,TTTCCGTTCGGG,TTTCTGATCGGG	377	1,1,1,1,4,1,1,1
Lib10^3 1 ng	TTTCCTCTTTCA	TTTCATCTTTCA,TTTGCTCTTTCA	223	1,1
Lib10^3 1 ng	TTTCGCTTGGCA	ATTCGCTTGGCA,GTTCGCTTGGCA,TTACGCTTGGCA,TTTCGCTTGACA,TTTCGCTTGCCA,TTTCGCTTGGTA,TTTCGGTTGGCA,TTTCGTTTGGCA	270	1,1,1,1,1,1,1,1
Lib10^3 1 ng	TTTCGTTACATA	TTTCGATACATA,TTTCGTTACTTA,TTTCGTTTCATA	325	2,1,1
Lib10^3 1 ng	TTTCTCCGGTCT	TTCCTCCGGTCT,TTTCTCCGGTGT	205	1,1
Lib10^3 1 ng	TTTCTGGTGATG	TTTCTGCTGATG,TTTCTGGTGCTG,TTTCTGGTGGTG,TTTCTGGTGTTG	249	1,1,5,2
Lib10^3 1 ng	TTTCTGTTGATT		99
Lib10^3 1 ng	TTTCTTATGGTC	TTGCTTATGGTC	272	1
Lib10^3 1 ng	TTTGAATAGCCG	TATGAATAGCCG,TTTGAATAGCCT,TTTGAATAGCTG,TTTGGATAGCCG,TTTGTATAGCCG	295	1,1,1,3,1
Lib10^3 1 ng	TTTGACTGTCGC	ATTGACTGTCGC,TATGACTGTCGC,TTTGACTGGCGC,TTTGACTGTCCC,TTTGGCTGTCGC,TTTGTCTGTCGC,TTTNACTGTCGC	464	1,1,2,1,1,8,1
Lib10^3 1 ng	TTTGCAACTTTA	ATTGCAACTTTA	169	1
Lib10^3 1 ng	TTTGCGGGTTTA	TTTGCGCGTTTA	69	1
Lib10^3 1 ng	TTTGGAGGGTCA	TTGGGAGGGTCA,TTTCGAGGGTCA,TTTGGAGCGTCA,TTTGGTGGGTCA,TTTTGAGGGTCA	200	1,1,2,5,1
Lib10^3 1 ng	TTTGGGTATATT	ATTGGGTATATT,TTGGGGTATATT,TTTGCGTATATT,TTTGGGGATATT,TTTGGGTAGATT	359	1,1,1,1,1
Lib10^3 1 ng	TTTGTATGGTTG	TTTGAATGGTTG,TTTGTANGGTTG	112	1,1
Lib10^3 1 ng	TTTGTCCGTAGG	TTCGTCCGTAGG,TTGGTCCGTAGG,TTTGTCCGAAGG,TTTGTCCGCAGG,TTTGTCCGGAGG,TTTGTCCGTAGC,TTTGTCCGTTGG	273	1,1,1,1,2,1,3
Lib10^3 1 ng	TTTGTTGCTAGT	ATTGTTGCTAGT,TTTGTCGCTAGT,TTTGTTGCTAGA	102	1,1,1
Lib10^3 1 ng	TTTGTTTTGATG	TTAGTTTTGATG,TTTGTNTTGATG,TTTGTTGTGATG,TTTGTTTCGATG,TTTGTTTTGCTG,TTTGTTTTGGTG,TTTGTTTTGTTG	270	1,1,1,1,1,7,6
Lib10^3 1 ng	TTTTAATACGGG	ATTTAATACGGG,TATTAATACGGG,TTTTAATACCGG,TTTTAATACGGA,TTTTAATACGGC,TTTTAGTACGGG	247	1,1,1,1,1,1
Lib10^3 1 ng	TTTTAGTTTGAG	TTTTAGTTTCAG,TTTTAGTTTGCG,TTTTAGTTTGGG,TTTTAGTTTGTG	174	1,1,11,6
Lib10^3 1 ng	TTTTATACATTT	TATTATACATTT	220	2
Lib10^3 1 ng	TTTTCAAATCCG	TTTTCAAATCCA,TTTTCAAGTCCG,TTTTCANATCCG,TTTTCTAATCCG	143	1,1,1,2
Lib10^3 1 ng	TTTTCCATTCTG	TTTACCATTCTG,TTTTCCATTCTA,TTTTCCTTTCTG,TTTTTCATTCTG	190	1,1,1,1
Lib10^3 1 ng	TTTTCCTGCTTA	CTTTCCTGCTTA,TATTCCTGCTTA,TTTACCTGCTTA,TTTTGCTGCTTA	307	1,1,1,1
Lib10^3 1 ng	TTTTCGGTGCAC	ATTTCGGTGCAC	115	1
Lib10^3 1 ng	TTTTCTCCTCCA	TTTTCTCCTCGA,TTTTCTCCTTCA	38	1,1
Lib10^3 1 ng	TTTTGCAATCAA	TTATGCAATCAA,TTTTGCAACCAA,TTTTGCAGTCAA	225	1,1,1
Lib10^3 1 ng	TTTTGGCGTTGT	TTTGGGCGTTGT,TTTTGGCGGTGT,TTTTGGCGTAGT	223	1,1,1
Lib10^3 1 ng	TTTTGGTAGGTC	ATTTGGTAGGTC,CTTTGGTAGGTC,TTTTGGGAGGTC,TTTTGGTAGGAC,TTTTGGTAGGTT	343	1,1,1,1,1
Lib10^3 1 ng	TTTTGGTTGTGG	TTCTGGTTGTGG,TTTAGGTTGTGG,TTTCGGTTGTGG,TTTTGATTGTGG,TTTTGGTTGAGG,TTTTGGTTGGGG	192	1,1,1,1,2,1
Lib10^3 1 ng	TTTTGTTGGGAT	TTTAGTTGGGAT,TTTTGGTGGGAT,TTTTGTTGCGAT,TTTTGTTGGGTT	325	1,1,1,4
Lib10^3 1 ng	TTTTGTTTGCTC	TTATGTTTGCTC,TTTNGTTTGCTC,TTTTGATTGCTC,TTTTGTTTGATC,TTTTGTTTGCAC,TTTTGTTTGCCC	242	1,1,1,1,1,1
Lib10^3 1 ng	TTTTTATGTTTG	TTATTATGTTTG,TTTATATGTTTG,TTTTTATATTTG,TTTTTATGTTAG	320	1,1,1,2
Lib10^3 1 ng	TTTTTCATTGCT	ATTTTCATTGCT,TTATTCATTGCT,TTCTTCATTGCT,TTGTTCATTGCT,TTTATCATTGCT,TTTTTCATTCCT,TTTTTCATTGCC	206	1,1,1,1,1,1,1
Lib10^3 1 ng	TTTTTCGCTGTA	ATTTTCGCTGTA,TTATTCGCTGTA,TTTNTCGCTGTA,TTTTTAGCTGTA,TTTTTCGCTATA,TTTTTCGCTCTA,TTTTTCGCTGGA,TTTTTCGCTGTC,TTTTTCGCTGTT,TTTTTCGGTGTA,TTTTTCGTTGTA,TTTTTCNCTGTA,TTTTTTGCTGTA	623	2,1,1,1,1,1,3,19,1,1,1,1,1
Lib10^3 1 ng	TTTTTGCCCACA	TTTTTACCCACA,TTTTTGCCAACA,TTTTTGCCCACT,TTTTTGCCCCCA,TTTTTGTCCACA	268	1,1,1,1,1
Lib10^3 1 ng	TTTTTGCTAAGT	TTTTTGCTATGT	122	1
Lib10^3 1 ng	TTTTTGTATTGG	TGTTTGTATTGG,TTTATGTATTGG,TTTTTGTATTGA,TTTTTGTATTGT	182	1,1,1,1
Lib10^3 1 ng	TTTTTTAGTATG	TTGTTTAGTATG,TTTTTTAGTTTG	165	1,2
Lib10^3 1 ng	TTTTTTCTGTTT	GTTTTTCTGTTT,TTTTTGCTGTTT,TTTTTTCTGATT	172	1,1,1
Lib10^3 1 ng	TTTTTTGGGTTT	TATTTTGGGTTT,TTTTTTGGCTTT,TTTTTTGGGGTT,TTTTTTGNGTTT	165	1,1,1,1
Lib10^3 1 ng	TTTTTTTTCCAA	TTTATTTTCCAA,TTTTGTTTCCAA,TTTTTTNTCCAA,TTTTTTTTCCTA,TTTTTTTTCTAA	235	1,1,1,1,1
Lib10^3 3.3 ng	AAACGGAGCTCT	AAACCGAGCTCT,AAACGGANCTCT,AAACGGGGCTCT,AAACGGTGCTCT,AGACGGAGCTCT	204	1,1,5,4,2
Lib10^3 3.3 ng	AAACGGCCGCAG	AAACGCCCGCAG,AAACGGACGCAG,AAACGGCCGCCG,AAACGGCCGCTG,AAACGGCCGTAG,AAACGGCNGCAG,AAACGGGCGCAG,AAACGGTCGCAG,ACACGGCCGCAG,AGACGGCCGCAG	336	2,1,1,5,1,1,1,2,2,1
Lib10^3 3.3 ng	AAAGGTATCACG	AAAGGTAACACG,AAANGTATCACG,AAGGGTATCACG,ACAGGTATCACG	202	1,1,1,1
Lib10^3 3.3 ng	AACAGAAATTGG	AACAGAAATAGG,AACAGAAATTGA,AACAGAACTTGG	121	2,1,1
Lib10^3 3.3 ng	AACATTTCCTGA	AACACTTCCTGA,AACATTTCCAGA,AACATTTCCCGA,AACATTTCCTGC,AACATTTCCTGG,AACATTTCCTGT,AACATTTCCTTA,ACCATTTCCTGA,AGCATTTCCTGA	379	1,1,1,2,2,2,1,1,2
Lib10^3 3.3 ng	AACCAAATCGAT	AACCAAATCGGT,AACCAAATCGTT,AACCACATCGAT	153	1,1,1
Lib10^3 3.3 ng	AACCAGTGTTAT	AACCAGGGTTAT,AACCAGTGTAAT,AACCTGTGTTAT,AGCCAGTGTTAT	220	1,2,1,1
Lib10^3 3.3 ng	AACGACCAAGCA	AACGACCTAGCA,AACGAGCAAGCA,AACGGCCAAGCA,AACGTCCAAGCA,AACNACCAAGCA,AAGGACCAAGCA	188	1,1,1,2,1,1
Lib10^3 3.3 ng	AACGTGAGTTTT	AACGTGAGGTTT,AACGTGGGTTTT,AACGTGTGTTTT,AGCGTGAGTTTT,ATCGTGAGTTTT	181	1,2,2,1,1
Lib10^3 3.3 ng	AACTCTGCATTG	AACTCTGCATTT,AACTCTGCGTTG,AACTCTGCTTTG,AACTGTGCATTG	214	1,1,2,1
Lib10^3 3.3 ng	AAGAATTAGGAT	AACAATTAGGAT,AAGAATAAGGAT,AAGAATTAGGGT,AAGCATTAGGAT,AAGGATTAGGAT,CAGAATTAGGAT	247	1,1,1,1,2,1
Lib10^3 3.3 ng	AAGATTCCGTTA	AAGATNCCGTTA,AAGATTCCATTA,AAGATTCCCTTA,AAGATTCCGATA,AAGATTCCGTCA	273	1,1,2,1,1
Lib10^3 3.3 ng	AAGCACTAGAGT	AAACACTAGAGT,AAGCACTAGAGG,AAGCACTAGGGT,AAGCACTAGNGT,AAGCACTAGTGT,AAGCAGTAGAGT,AAGCGCTAGAGT,AAGCTCTAGAGT	187	1,1,1,1,4,1,1,1
Lib10^3 3.3 ng	AAGGACTCGCTT	AAGGANTCGCTT,ACGGACTCGCTT	160	1,1
Lib10^3 3.3 ng	AAGGCCATATGT	AAGACCATATGT,AAGGCCATATGC,AAGGCGATATGT,TAGGCCATATGT	221	1,1,1,1
Lib10^3 3.3 ng	AAGGCGCTTTAA	AAGGCACTTTAA,AAGGCGCATTAA,AAGGCGCCTTAA,AAGGCGCGTTAA,AAGGCGCTTAAA,AAGGCGCTTCAA,AAGGCGCTTTAG,AAGGCGGTTTAA	272	1,2,2,1,1,1,1,2
Lib10^3 3.3 ng	AAGGGTTTATGG	AAGAGTTTATGG,AAGGGATTATGG,AAGGGCTTATGG,AAGGGGTTATGG,AAGGGTNTATGG,AAGGGTTAATGG,AAGGGTTTAGGG,AAGGGTTTATGA,AAGGGTTTATGT,AAGGTTTTATGG	291	1,2,2,1,1,1,2,1,1,1
Lib10^3 3.3 ng	AAGGTCCGGGCC	AAGGTCCGCGCC,AAGGTCCGTGCC,AAGGTCTGGGCC,ATGGTCCGGGCC,CAGGTCCGGGCC	219	1,1,1,1,1
Lib10^3 3.3 ng	AAGTGCTTTCGG	AAGTGCTTTTGG	71	2
Lib10^3 3.3 ng	AAGTGCTTTTCC	AAGCGCTTTTCC,AAGGGCTTTTCC,AAGTGCNTTTCC,AAGTGCTNTTCC,AAGTGCTTTGCC,ACGTGCTTTTCC	257	1,3,1,1,1,1
Lib10^3 3.3 ng	AAGTTAGTAGGA	AAATTAGTAGGA,AAGTTAGAAGGA,AAGTTAGTAAGA,AAGTTAGTAGGG,AAGTTAGTAGGT,AAGTTAGTTGGA,AATTTAGTAGGA	269	1,1,1,1,2,1,1
Lib10^3 3.3 ng	AAGTTCCGATAT	AAGATCCGATAT,AAGTTCCGATAC,AAGTTCCGTTAT,AAGTTCGGATAT,AAGTTCNGATAT,TAGTTCCGATAT	172	1,1,1,1,1,1
Lib10^3 3.3 ng	AATAATTGCCAA	AATAATTGCCGA,AATAATTGGCAA,AATCATTGCCAA	46	1,1,1
Lib10^3 3.3 ng	AATAGGCTAATA	AATAGNCTAATA	179	1
Lib10^3 3.3 ng	AATCCGGGTGGA	AATCCCGGTGGA,AATCCGAGTGGA,AATCCGGATGGA,AATCCGGGAGGA,AATCCGGGCGGA,AATCCGGGGGGA,AATCCGGGTGAA,AATCCGGGTGGG,AATCCGGGTGGT,AATCCGGNTGGA,AATCGGGGTGGA,AATCTGGGTGGA,AGTCCGGGTGGA	283	1,1,1,1,1,1,1,1,1,1,1,1,1
Lib10^3 3.3 ng	AATCGAGTCGTG	AATCGAGGCGTG,AATCGAGTCCTG,AATCGAGTCGGG,AATCGGGTCGTG,AATNGAGTCGTG,ACTCGAGTCGTG	156	1,1,3,1,1,1
Lib10^3 3.3 ng	AATCGGTATATA	AATCGGAATATA,AATCGGGATATA,AATCGGTATGTA,AGTCGGTATATA	266	3,1,1,1
Lib10^3 3.3 ng	AATCTGGAGTTT	AATCTGCAGTTT,AATCTGGAGTGT,AATCTGGGGTTT,AATCTGGTGTTT,AATCTGNAGTTT,AATCTGTAGTTT	250	2,1,1,1,2,1
Lib10^3 3.3 ng	AATGCGGTCGGG	AAAGCGGTCGGG,AATGCGATCGGG,AATGCGCTCGGG,AATGTGGTCGGG,ACTGCGGTCGGG	289	1,1,2,1,1
Lib10^3 3.3 ng	AATGCTCCAGCT	AATGCTCCAGCC,ATTGCTCCAGCT	232	1,1
Lib10^3 3.3 ng	AATGGGAATTGG	AATGGAAATTGG,AATGGGAATAGG,AATGGGGATTGG,AATGGTAATTGG,ACTGGGAATTGG	218	1,1,2,1,1
Lib10^3 3.3 ng	AATGTGACGGTC	AATGTGTCGGTC,AATGTNACGGTC,ACTGTGACGGTC	153	2,1,1
Lib10^3 3.3 ng	AATTACAACCAT	AATTACAACNAT,AATTACAAGCAT,AATTACACCCAT,AATTACAGCCAT	96	1,1,1,1
Lib10^3 3.3 ng	AATTATATGTAT	AATTATAGGTAT,AATTATATATAT,AATTATCTGTAT	211	1,1,1
Lib10^3 3.3 ng	AATTCTTTGTCC	AAGTCTTTGTCC,AATACTTTGTCC,AATTCTTNGTCC,AATTCTTTGACC,ACTTCTTTGTCC,AGTTCTTTGTCC	253	1,1,1,1,1,1
Lib10^3 3.3 ng	AATTGCTAACTC	AATTGCTAGCTC,AGTTGCTAACTC	362	2,1
Lib10^3 3.3 ng	AATTTCGTTTTT	AATTTCGTATTT,AATTTCGTCTTT,AATTTCNTTTTT,AATTTTGTTTTT,GATTTCGTTTTT	218	1,4,1,1,1
Lib10^3 3.3 ng	AATTTTTAACAC	AATTTCTAACAC	75	1
Lib10^3 3.3 ng	ACAACGTAGGGC	ACAAGGTAGGGC,ACAATGTAGGGC,ACAGCGTAGGGC,ACCACGTAGGGC	237	1,1,1,1
Lib10^3 3.3 ng	ACAAGCGTTCCA	ACAAGCGGTCCA,ACAAGCGTACCA,ACAAGCGTCCCA,ACAAGCGTGCCA,ACAAGCGTTCGA,ACAAGGGTTCCA,ACTAGCGTTCCA	244	1,7,1,2,1,1,1
Lib10^3 3.3 ng	ACAATATGACTT	ACAATATGAGTT,ACAATATGGCTT,ACAATATGTCTT,ACAATATNACTT,GCAATATGACTT	304	1,1,1,1,1
Lib10^3 3.3 ng	ACACTTATGCAC	ACAATTATGCAC,CCACTTATGCAC	79	1,1
Lib10^3 3.3 ng	ACAGGACATCAA	ACAGGACATCAG,ACAGGCCATCAA	31	1,1
Lib10^3 3.3 ng	ACAGTTATATTA	ACAGTGATATTA,ACAGTTAAATTA,ACAGTTATATCA,ACANTTATATTA	145	1,1,1,1
Lib10^3 3.3 ng	ACATATCCGGAC	ACATATCCGGCC,ACATATGCGGAC,ACATGTCCGGAC,ACATTTCCGGAC	219	1,1,1,2
Lib10^3 3.3 ng	ACATGGGACTCC	ACATGGGNCTCC,ACATGGGTCTCC,ACATGGTACTCC,ATATGGGACTCC	185	1,2,1,1
Lib10^3 3.3 ng	ACCACTTGGCTT	ACCACNTGGCTT,ACCACTTGCCTT,ACCAGTTGGCTT,ACCTCTTGGCTT,TCCACTTGGCTT	259	1,1,1,1,2
Lib10^3 3.3 ng	ACCAGGAGGCTT	ACCAGGAGGCAT,ACCAGGGGGCTT,ACCAGGTGGCTT,ACCTGGAGGCTT,ATCAGGAGGCTT	160	1,1,2,1,1
Lib10^3 3.3 ng	ACCCCTTTTTCG	ACCCCTTTTTCC,ACCCGTTTTTCG,ACCGCTTTTTCG,ATCCCTTTTTCG,CCCCCTTTTTCG	200	1,1,1,1,1
Lib10^3 3.3 ng	ACCCTACTTTAT	ACCCTACTTCAT,ACCCTACTTGAT,ACCCTGCTTTAT	214	1,1,1
Lib10^3 3.3 ng	ACCGTCTACGCG	ACCGGCTACGCG,ACCGTCTACACG,ACCGTCTACGCA,ACCGTGTACGCG,ACCGTTTACGCG	124	2,1,1,1,1
Lib10^3 3.3 ng	ACCTAGCGTGTT	ACCTAGCGTATT,ACCTAGCGTGCT,ACCTAGCGTGGT,ACCTAGCTTGTT,ACCTAGTGTGTT,GCCTAGCGTGTT,TCCTAGCGTGTT	254	1,1,1,1,1,2,1
Lib10^3 3.3 ng	ACCTTCATCGAA	ACCTACATCGAA,ACCTTCATCCAA,ACCTTCATCGCA,ACCTTCATCGGA,ACCTTCATCGTA	312	1,1,2,1,5
Lib10^3 3.3 ng	ACCTTGGATGTA	ACCTTGGAGGTA,ACCTTGGTTGTA,ATCTTGGATGTA	248	1,3,1
Lib10^3 3.3 ng	ACCTTTTCCGCG	ACCGTTTCCGCG,ACCTTTNCCGCG,ACCTTTTCAGCG,ACCTTTTCCGCA	191	1,1,1,1
Lib10^3 3.3 ng	ACGACTCGTGGA	ACGACTCGAGGA,ACGACTCGGGGA,ACGACTCGTGGG,ACGGCTCGTGGA,ACGTCTCGTGGA,ATGACTCGTGGA,CCGACTCGTGGA	220	1,3,2,2,2,1,1
Lib10^3 3.3 ng	ACGATAAGAGTG	ACGAGAAGAGTG,ACGATAAGGGTG,ACGATATGAGTG,ACGGTAAGAGTG	243	1,2,1,2
Lib10^3 3.3 ng	ACGATATTTGAA	AAGATATTTGAA,ACGACATTTGAA,ACGATATTAGAA,ACGATATTTAAA,ACGATATTTGGA,ACGATATTTGTA,ACGATTTTTGAA,GCGATATTTGAA,TCGATATTTGAA	275	1,1,1,2,2,2,1,1,1
Lib10^3 3.3 ng	ACGATGCTGTAA	ACGACGCTGTAA,ACGATGCGGTAA,ACGATGCTGCAA,ACGATGCTGTAC,ACGATGGTGTAA,ACGGTGCTGTAA,ACGTTGCTGTAA,AGGATGCTGTAA,ATGATGCTGTAA,GCGATGCTGTAA,TCGATGCTGTAA	309	1,1,1,1,1,2,1,1,1,1,1
Lib10^3 3.3 ng	ACGATTGCTTAA	ACAATTGCTTAA,ACGAGTGCTTAA,ACGATAGCTTAA,ACGATTGATTAA,ACGATTGCATAA,ACGATTGCTTGA,ATGATTGCTTAA	362	1,1,1,1,2,1,1
Lib10^3 3.3 ng	ACGCACATGTTA	ACGCACATGCTA,ACGCGCATGTTA,ACGGACATGTTA	204	1,1,1
Lib10^3 3.3 ng	ACGCAGATGAGA	ACGCAGATGAGG,ACGCAGATGGGA,ACGCAGATGTGA,ACGCAGNTGAGA,ACGCCGATGAGA,ACGCGGATGAGA	236	2,1,4,1,1,1
Lib10^3 3.3 ng	ACGCTCAACTAG	ACGCTCAACCAG,ACGCTCAACTAA,ACGCTCAACTGG,ACGCTCAACTTG,ACGCTCAATTAG,ACGCTCATCTAG,ACGCTCGACTAG,ACGCTCTACTAG	373	1,1,2,2,1,1,2,1
Lib10^3 3.3 ng	ACGGCGGATGAA	ACGGCCGATGAA,ACGGCGGATCAA,ACGGCGGATGAC,ACGGCGGATGGA,ACGGCGGATGTA,ACGGCGGGTGAA,ACGNCGGATGAA	271	1,3,2,3,1,1,1
Lib10^3 3.3 ng	ACGGGATGGTCT	AAGGGATGGTCT,ACGGCATGGTCT,ACGGGANGGTCT,ACGGGATGCTCT,ACGGGATNGTCT,ACGGGGTGGTCT,ATGGGATGGTCT	220	2,1,2,1,1,2,2
Lib10^3 3.3 ng	ACGGTGTCAGGG	ACGGAGTCAGGG,ACGGTGACAGGG,ACGGTGTCAAGG,ACGGTGTCATGG,GCGGTGTCAGGG	248	1,1,1,1,1
Lib10^3 3.3 ng	ACGTCCGCTACC	ACGACCGCTACC,ACGTCCGCTAGC,ACGTCCGCTTCC,GCGTCCGCTACC	220	2,1,1,1
Lib10^3 3.3 ng	ACGTGTTAATCG	ACCTGTTAATCG,ACGTGTTACTCG,ATGTGTTAATCG	177	1,1,1
Lib10^3 3.3 ng	ACTAACTAGTTC	AATAACTAGTTC,ACTAACGAGTTC,ACTAACTAATTC,ACTAACTACTTC,ACTAACTAGTGC,ACTACCTAGTTC,ACTATCTAGTTC	181	1,1,1,1,1,1,1
Lib10^3 3.3 ng	ACTATCCATGAC	ACTATCCATGAG,ACTTTCCATGAC,CCTATCCATGAC	234	1,1,1
Lib10^3 3.3 ng	ACTATGGACGTA	ACTATGAACGTA,ACTATGGACATA,ACTATGGACGGA,ACTATGGTCGTA,AGTATGGACGTA,CCTATGGACGTA	345	1,1,1,4,1,1
Lib10^3 3.3 ng	ACTCAGTTGATG	ACTCACTTGATG,ACTCAGGTGATG,ACTCAGTTGTTG,ACTCGGTTGATG	136	1,1,3,1
Lib10^3 3.3 ng	ACTCCATCGGGG	ACTCCATCGCGG,ACTCCATCGTGG	88	1,1
Lib10^3 3.3 ng	ACTCGGGTAGTT	ACTCGGGCAGTT,ACTGGGGTAGTT	196	1,1
Lib10^3 3.3 ng	ACTCTGGTTCTT	ACTCTCGTTCTT,ACTCTGCTTCTT,ACTCTGGTTCAT,ACTCTGGTTCTA,ACTCTGGTTGTT,ACTTTGGTTCTT,TCTCTGGTTCTT	238	1,1,1,2,2,1,3
Lib10^3 3.3 ng	ACTGTACCCCAG	ACTGAACCCCAG,ACTGTACCCCAA,ACTGTACCCCCG,ACTGTACCCCTG,ACTGTAGCCCAG,ACTGTNCCCCAG,TCTGTACCCCAG	258	2,1,1,4,1,1,1
Lib10^3 3.3 ng	ACTGTTTGAGCG	ACTGGTTGAGCG,ACTGTTNGAGCG,ACTGTTTGGGCG,ACTGTTTGTGCG,TCTGTTTGAGCG	100	1,1,1,2,2
Lib10^3 3.3 ng	ACTTACCGAGAG	AATTACCGAGAG,ACTTAACGAGAG,ACTTACCGAGAT,ACTTACCGAGCG,ACTTACCGAGGG,ACTTACCGAGTG,ACTTACCGGGAG,ACTTACCGTGAG,ACTTTCCGAGAG	205	2,1,1,1,9,9,1,1,1
Lib10^3 3.3 ng	ACTTACCGTGGA	ACTTACCGTGGG,ACTTACCGTGGT	317	3,3
Lib10^3 3.3 ng	ACTTGACGTCTC	ACCTGACGTCTC,ACTTCACGTCTC,ACTTGCCGTCTC,ACTTGGCGTCTC,ACTTGTCGTCTC,ATTTGACGTCTC	341	1,1,3,5,5,1
Lib10^3 3.3 ng	ACTTGCTTATTT	ACTAGCTTATTT,ACTTACTTATTT,ACTTGCTTAGTT,ACTTGCTTATAT,ACTTGCTTATTG,ACTTGCTTTTTT,ACTTGGTTATTT,AGTTGCTTATTT	291	1,1,1,1,2,1,1,1
Lib10^3 3.3 ng	AGAATGCGAACG	AGAATGCGCACG,AGAATGCGGACG,AGAATGCGTACG,AGAATGNGAACG,AGGATGCGAACG,AGTATGCGAACG	118	1,1,3,1,1,1
Lib10^3 3.3 ng	AGAATTTTATGT	AAAATTTTATGT,AGAATTGTATGT,AGAATTTTATGA,AGAATTTTATGG,AGGATTTTATGT,AGTATTTTATGT	260	1,1,1,1,2,1
Lib10^3 3.3 ng	AGACCTCTGCTG	AGTCCTCTGCTG	270	2
Lib10^3 3.3 ng	AGACTATTTGTA	AGACTAATTGTA,AGACTANTTGTA,AGAGTATTTGTA,AGTCTATTTGTA	296	1,1,1,1
Lib10^3 3.3 ng	AGACTTAATTTT	AGANTTAATTTT,AGGCTTAATTTT,ATACTTAATTTT	81	1,1,1
Lib10^3 3.3 ng	AGAGAAGTCGCC	AGACAAGTCGCC,AGAGAAGNCGCC,AGAGAAGTCACC,AGAGAAGTTGCC,AGAGATGTCGCC,AGAGGAGTCGCC,AGTGAAGTCGCC,GGAGAAGTCGCC	267	1,1,1,1,1,1,2,1
Lib10^3 3.3 ng	AGAGGAGATTAC	AGAGGTGATTAC,AGAGTAGATTAC	148	3,1
Lib10^3 3.3 ng	AGATCTACGATT	AGACCTACGATT,AGATCTACGATC,AGATCTACGCTT,AGATCTACGGTT,AGATCTAGGATT,AGATCTANGATT,AGATCTCCGATT,AGGTCTACGATT,AGTTCTACGATT	268	1,1,1,1,1,1,1,1,1
Lib10^3 3.3 ng	AGATCTTGAAGC	AGATCTTGAGGC,AGATCTTGATGC,AGATCTTGGAGC,AGCTCTTGAAGC,AGGTCTTGAAGC,GGATCTTGAAGC,TGATCTTGAAGC	188	1,1,1,1,2,1,1
Lib10^3 3.3 ng	AGATTAAGTCGT	AAATTAAGTCGT,ACATTAAGTCGT,AGATTAAGACGT,AGATTAAGGCGT,AGATTAAGTCCT,AGATTAAGTCGG,AGATTAAGTGGT,AGATTAGGTCGT,AGATTATGTCGT,AGGTTAAGTCGT,TGATTAAGTCGT	489	1,2,1,2,1,2,1,1,2,1,1
Lib10^3 3.3 ng	AGCACCCGTCCC	AGCACCCGACCC,AGCACCCGGCCC,AGCACCTGTCCC,AGCACTCGTCCC,AGCATCCGTCCC,AGTACCCGTCCC	175	1,1,1,1,1,1
Lib10^3 3.3 ng	AGCCCATTTTAC	AGCCCAATTTAC,AGCCCCTTTTAC	244	1,1
Lib10^3 3.3 ng	AGCCGCTCAGCC	AGCCCCTCAGCC,AGCCGATCAGCC,AGCCGCTCTGCC,CGCCGCTCAGCC	193	1,1,1,1
Lib10^3 3.3 ng	AGCCTCTTCGGC	AGCCTCNTCGGC,AGCCTCTTTGGC,GGCCTCTTCGGC	231	1,1,1
Lib10^3 3.3 ng	AGCCTTGTAGAT	AGCCTTGGAGAT,AGCCTTGTAGGT,AGCCTTNTAGAT,ATCCTTGTAGAT	224	3,3,1,1
Lib10^3 3.3 ng	AGCGAATCGCAG	AGCGAAACGCAG,AGCGAATCCCAG,AGCGAATCGCAA,AGCGAATCGCAC,AGCGAATCGCCG,AGCGAATCGCGG,AGCGAATCGCTG,AGCGAGTCGCAG,TGCGAATCGCAG	230	1,1,1,1,3,1,3,1,2
Lib10^3 3.3 ng	AGCGCTACTGTC	AGAGCTACTGTC,AGCGCTANTGTC,GGCGCTACTGTC,TGCGCTACTGTC	145	1,1,1,1
Lib10^3 3.3 ng	AGCGGATTGAAG	AGCGAATTGAAG,AGCGGAGTGAAG,AGCGGATTGAGG,AGCGGATTGATG,AGCGGATTGCAG,AGCGGATTGGAG,AGCGGATTGTAG,AGCGGGTTGAAG,AGCGGTTTGAAG,AGGGGATTGAAG,AGTGGATTGAAG	232	1,1,1,1,1,2,1,1,1,1,1
Lib10^3 3.3 ng	AGCGTAAGTGTT	AGCGTAAGAGTT	45	1
Lib10^3 3.3 ng	AGCGTGCGTGGT	AACGTGCGTGGT,AGCCTGCGTGGT,AGCGGGCGTGGT,AGCGTGCGAGGT,AGCGTGCGTGGC,AGCGTGCGTGGG,AGCGTGNGTGGT,AGCGTGTGTGGT,TGCGTGCGTGGT	299	1,1,1,1,1,1,1,1,1
Lib10^3 3.3 ng	AGCTACGCACTC	AGATACGCACTC,AGCTACGCATTC,AGCTACGCTCTC,AGTTACGCACTC	184	1,1,1,1
Lib10^3 3.3 ng	AGCTTCTTTGCT	AGGTTCTTTGCT	207	1
Lib10^3 3.3 ng	AGCTTGCCTTTC	AGCTTGCCTTGC	61	1
Lib10^3 3.3 ng	AGCTTTGGGTGC	ACCTTTGGGTGC,AGCNTTGGGTGC,AGCTTAGGGTGC,AGCTTCGGGTGC,AGCTTGGGGTGC,AGCTTTGCGTGC,AGCTTTGGGAGC,AGCTTTGGGGGC,AGCTTTGGGTGA,AGCTTTGGGTGG,AGCTTTGTGTGC,AGGTTTGGGTGC,ATCTTTGGGTGC	242	1,1,2,1,1,1,1,3,1,1,2,1,1
Lib10^3 3.3 ng	AGGACCTCCGAT	AGGACCTCCGTT,AGGTCCTCCGAT	54	1,2
Lib10^3 3.3 ng	AGGACTCTCGGG	AGGACTATCGGG,AGGNCTCTCGGG,AGGTCTCTCGGG	116	1,1,2
Lib10^3 3.3 ng	AGGAGTCCACTG	AGGAGTCCACAG	29	1
Lib10^3 3.3 ng	AGGATTGAGGTC	AGGAATGAGGTC,AGGATAGAGGTC,AGGATGGAGGTC,AGGATTGAGCTC,AGGATTGAGGAC,AGGATTGGGGTC,AGGATTGTGGTC,CGGATTGAGGTC	319	2,1,2,1,1,2,5,1
Lib10^3 3.3 ng	AGGCATCTTTTT	ACGCATCTTTTT,AGCCATCTTTTT,AGGCATCTTTGT,CGGCATCTTTTT	117	1,1,1,1
Lib10^3 3.3 ng	AGGCATGGTGTG	AGGAATGGTGTG,AGGCATGGTGAG,GGGCATGGTGTG	136	1,1,1
Lib10^3 3.3 ng	AGGCCAGATGGT		25
Lib10^3 3.3 ng	AGGCCTTCGGGA	ACGCCTTCGGGA,AGGCCTGCGGGA,AGGCCTTCGCGA,AGGCCTTCGGAA,AGGCCTTCGGGG,AGGCCTTCGGGT	162	1,1,1,1,1,1
Lib10^3 3.3 ng	AGGCTGGTTTCC	AGGCTGATTTCC,AGGNTGGTTTCC,GGGCTGGTTTCC	254	1,1,2
Lib10^3 3.3 ng	AGGCTTTCGCTT	ACGCTTTCGCTT,AGGCATTCGCTT,AGGCTTGCGCTT,AGGCTTTCGCGT,ATGCTTTCGCTT,TGGCTTTCGCTT	252	1,1,1,1,1,1
Lib10^3 3.3 ng	AGGGCGGACACA	AGGGAGGACACA,AGGGCCGACACA,AGGGCGGACGCA,AGGGCGGACTCA,AGGGCGGTCACA,AGTGCGGACACA,ATGGCGGACACA,GGGGCGGACACA	309	1,1,1,2,1,1,1,1
Lib10^3 3.3 ng	AGGGGATGTATC	AGGCGATGTATC,AGGGCATGTATC,AGGGGATGGATC,AGGGGATGTAGC,AGGGGATGTATT,AGGGGGTGTATC,AGGGGTTGTATC,AGTGGATGTATC,ATGGGATGTATC,TGGGGATGTATC	281	1,1,1,1,1,2,1,1,1,1
Lib10^3 3.3 ng	AGGGGGTCTTCT	AGCGGGTCTTCT,AGGGGATCTTCT,AGGGGGACTTCT,AGGGGGCCTTCT,AGGGGGNCTTCT,AGGGGGTCGTCT,AGGGGGTCTACT,AGGGGGTCTTTT,AGGGGGTGTTCT,AGGTGGTCTTCT	503	1,1,1,1,1,1,1,1,1,1
Lib10^3 3.3 ng	AGGGGTGCATAT	AGGGGTGGATAT,GGGGGTGCATAT	122	1,1
Lib10^3 3.3 ng	AGGGGTGCCATT	ACGGGTGCCATT,AGGAGTGCCATT,AGGGGGGCCATT,AGGGGTACCATT,AGGGGTGCCATC	245	1,1,1,1,1
Lib10^3 3.3 ng	AGGGTTAGTGTT	AGGGTGAGTGTT,AGGGTTAGGGTT,AGGGTTAGTGGT,ATGGTTAGTGTT,TGGGTTAGTGTT	308	1,1,1,1,2
Lib10^3 3.3 ng	AGGGTTGCGGGA	AGGATTGCGGGA,AGGGCTGCGGGA,AGGGGTGCGGGA,AGGGTAGCGGGA,AGGGTCGCGGGA,AGGGTGGCGGGA,AGGGTTGCGCGA,AGGGTTGCGGAA,AGGGTTGCGGGC,AGGGTTGCGGGG,AGGGTTGCGTGA,AGGGTTGNGGGA,AGTGTTGCGGGA,GGGGTTGCGGGA	298	1,1,1,1,1,1,2,1,1,1,1,1,1,1
Lib10^3 3.3 ng	AGGTATAATGAG	AGGNATAATGAG,AGGTAAAATGAG,AGGTATAATGGG,AGGTATAATGTG,AGGTATAGTGAG,AGGTATNATGAG	189	1,1,7,10,2,1
Lib10^3 3.3 ng	AGGTCATGTTTG	ACGTCATGTTTG,AGGACATGTTTG,AGGGCATGTTTG,AGGTCATGCTTG,AGGTCATGGTTG,AGGTCATNTTTG,AGTTCATGTTTG,TGGTCATGTTTG	346	1,1,1,1,1,2,1,1
Lib10^3 3.3 ng	AGGTCTATATAC	AGGCCTATATAC,AGGGCTATATAC,AGGTCTATAAAC,AGGTCTATTTAC,AGGTGTATATAC	308	2,2,1,1,2
Lib10^3 3.3 ng	AGGTGGCTTATT	AGGCGGCTTATT,AGGTGCCTTATT,AGGTGGATTATT,AGGTGGCCTATT,AGGTGGCGTATT,AGGTGTCTTATT	168	1,1,1,1,1,1
Lib10^3 3.3 ng	AGGTGTCCATAG	AGGGGTCCATAG,AGGTGTCCATTG,AGGTGTCGATAG	120	1,1,1
Lib10^3 3.3 ng	AGGTTTTTAGTT	AGGCTTTTAGTT,AGGGTTTTAGTT,AGGTTTCTAGTT,AGGTTTTTAGAT	86	1,1,1,1
Lib10^3 3.3 ng	AGTAAGTTAGGT	AGAAAGTTAGGT,AGTAAGATAGGT,AGTAAGGTAGGT,AGTAAGTTACGT,AGTAAGTTAGCT,AGTAANTTAGGT	255	1,2,1,1,1,1
Lib10^3 3.3 ng	AGTAATAAAGTG	AGTAAGAAAGTG,AGTAANAAAGTG,AGTAATAAAATG,AGTAATAAAGCG,AGTAATAAAGGG,AGTAATAAAGTC,AGTAATAATGTG,AGTATTAAAGTG,AGTGATAAAGTG	316	1,2,1,1,1,1,1,1,1
Lib10^3 3.3 ng	AGTAGACTACAT	AGGAGACTACAT,AGTAAACTACAT,AGTAGTCTACAT,CGTAGACTACAT	191	1,1,1,1
Lib10^3 3.3 ng	AGTAGTTTCTTG	AATAGTTTCTTG,AGAAGTTTCTTG,AGTAGTATCTTG,AGTAGTTCCTTG	147	1,1,1,1
Lib10^3 3.3 ng	AGTATATTGCGC	AGAATATTGCGC,AGTAAATTGCGC,AGTATATTACGC,AGTATATTCCGC,AGTATATTGCCC,AGTNTATTGCGC,TGTATATTGCGC	316	1,1,2,1,1,1,1
Lib10^3 3.3 ng	AGTATTGGTGTG	ACTATTGGTGTG,AGGATTGGTGTG,AGTATTGCTGTG,AGTATTGGAGTG,AGTATTGGCGTG,AGTATTGGGGTG,AGTATTNGTGTG,AGTTTTGGTGTG,TGTATTGGTGTG	197	1,1,1,1,1,1,1,1,1
Lib10^3 3.3 ng	AGTCCTTCTTTG	AGTCCTACTTTG,AGTCCTCCTTTG,AGTCCTGCTTTG,AGTCCTNCTTTG,AGTCCTTCTGTG,AGTCCTTCTTAG,AGTGCTTCTTTG	205	2,1,1,1,1,1,1
Lib10^3 3.3 ng	AGTCGCCGACGC	AATCGCCGACGC,ACTCGCCGACGC,AGGCGCCGACGC,AGTCGCCCACGC,AGTCGCCGACGT,AGTCGCCGTCGC,AGTCGGCGACGC,AGTCNCCGACGC	225	1,1,1,1,1,2,1,1
Lib10^3 3.3 ng	AGTCGGGAGTAT	AGTCGGGAGCAT,AGTCGGGCGTAT,AGTCGGGTGTAT,AGTGGGGAGTAT	177	1,1,3,1
Lib10^3 3.3 ng	AGTCTCAATTGG	AGACTCAATTGG,AGTCACAATTGG,AGTCTCAATAGG,AGTCTCAATTGT,TGTCTCAATTGG	253	2,1,1,1,1
Lib10^3 3.3 ng	AGTCTTACACCA	AGGCTTACACCA,AGTCTNACACCA,AGTCTTACACTA,AGTCTTACTCCA	164	1,1,1,1
Lib10^3 3.3 ng	AGTGAGGGCTTT	AGCGAGGGCTTT,AGTGAGGCCTTT,AGTGAGGGCTTA,AGTGGGGGCTTT,TGTGAGGGCTTT	260	1,2,1,4,1
Lib10^3 3.3 ng	AGTGCTTATACC	AGCGCTTATACC,AGGGCTTATACC,AGTGATTATACC,AGTGCTTATACG,AGTGCTTATATC,AGTGCTTATCCC,AGTGCTTATGCC,AGTGGTTATACC,TGTGCTTATACC	202	1,1,1,1,1,1,1,1,1
Lib10^3 3.3 ng	AGTGGATGCTAT	AGGGGATGCTAT,AGTGCATGCTAT,AGTGGATGCCAT,AGTGGATGGTAT,AGTGGATNCTAT,AGTGGGTGCTAT,AGTGTATGCTAT	245	1,1,1,1,1,2,1
Lib10^3 3.3 ng	AGTGGCGGGTGA	AGTGCCGGGTGA,AGTGGCGCGTGA,AGTGGCGGATGA,AGTGGCGGCTGA,AGTGGCGGGCGA,AGTGGCGGGGGA,AGTGGCGGGTGG,AGTGGCGGGTGT,AGTGGCGGTTGA,AGTGGGGGGTGA	247	1,2,2,3,1,1,2,2,2,1
Lib10^3 3.3 ng	AGTGGGCTGGCT	AGAGGGCTGGCT,AGGGGGCTGGCT,AGTGGGCTGGCC,CGTGGGCTGGCT	187	1,1,1,1
Lib10^3 3.3 ng	AGTGTGAGTCTC	ACTGTGAGTCTC,AGGGTGAGTCTC,AGTGTGAGGCTC,AGTGTGAGTATC,AGTGTGAGTGTC,AGTGTGGGTCTC,AGTGTGTGTCTC	149	1,1,1,1,1,1,1
Lib10^3 3.3 ng	AGTGTGCCTATT	AATGTGCCTATT,ACTGTGCCTATT,AGAGTGCCTATT,AGCGTGCCTATT,AGTGAGCCTATT,AGTGTGTCTATT,AGTGTTCCTATT	262	1,1,1,1,1,1,1
Lib10^3 3.3 ng	AGTGTGGGGATA	AGCGTGGGGATA,AGTGTGGAGATA,AGTGTGGGGAGA,AGTGTGTGGATA,TGTGTGGGGATA	201	1,1,1,1,1
Lib10^3 3.3 ng	AGTGTGTTTTCA	AGGGTGTTTTCA,AGTGTGATTTCA,AGTGTGGTTTCA,AGTGTGTTTTTA	238	1,1,1,1
Lib10^3 3.3 ng	AGTGTTTTTTGT	AGTGTTTTCTGT,AGTGTTTTTCGT,AGTGTTTTTTGG	161	2,1,1
Lib10^3 3.3 ng	AGTTACTGCTTT	AGTTATTGCTTT	259	1
Lib10^3 3.3 ng	AGTTGAATTATG	AATTGAATTATG,AGGTGAATTATG,AGTTGAATTATA	88	1,1,1
Lib10^3 3.3 ng	AGTTGAGCTTAC	AGTTGGGCTTAC	67	1
Lib10^3 3.3 ng	AGTTGTCGGTAC	AGCTGTCGGTAC,AGTTGACGGTAC,AGTTGCCGGTAC,AGTTGTCGGAAC,AGTTGTCGGGAC,AGTTGTCGTTAC,GGTTGTCGGTAC	262	3,2,1,1,2,1,1
Lib10^3 3.3 ng	AGTTTCGATGAG	ACTTTCGATGAG,AGATTCGATGAG,AGGTTCGATGAG,AGTATCGATGAG,AGTTTCGATAAG,AGTTTCGATGGG,AGTTTCGATGTG,AGTTTCGCTGAG,AGTTTCGTTGAG	253	2,1,1,2,1,13,17,1,3
Lib10^3 3.3 ng	AGTTTCTGCCGT	AGTCTCTGCCGT	193	1
Lib10^3 3.3 ng	AGTTTCTTATGA	AATTTCTTATGA,ACTTTCTTATGA,AGATTCTTATGA,AGTTTCTTATGG,AGTTTCTTATGT,AGTTTGTTATGA,AGTTTTTTATGA,GGTTTCTTATGA	315	1,2,2,1,2,1,1,1
Lib10^3 3.3 ng	ATAACTGGACCC	ATAACTGAACCC,ATAACTGGCCCC,ATAACTGGGCCC,ATAACTGGTCCC	187	1,3,2,6
Lib10^3 3.3 ng	ATAATCCTTGCA	ATAATCCTGGCA,ATAATCCTTACA,ATAATCCTTGCT,ATAATCCTTTCA,ATAGTCCTTGCA,ATTATCCTTGCA	257	1,1,1,1,3,1
Lib10^3 3.3 ng	ATAATGGTCTTT	ATAAGGGTCTTT,ATAATCGTCTTT,ATAATGGTCTAT,ATAATGGTCTGT,ATAATGGTCTTA,ATAATGGTCTTC,ATAATGGTCTTG,ATCATGGTCTTT	277	1,1,1,2,1,1,1,2
Lib10^3 3.3 ng	ATAATGTCATTG	ATAATCTCATTG,ATACTGTCATTG,ATAGTGTCATTG	353	2,1,1
Lib10^3 3.3 ng	ATACCGGCGGTT	ATACCGACGGTT,ATACCGGCGGGT	255	1,29
Lib10^3 3.3 ng	ATACCTGTTAAT	ATACCTGATAAT,ATACCTGNTAAT,ATACCTGTAAAT	87	1,1,1
Lib10^3 3.3 ng	ATAGGCATGTAG	ATAGCCATGTAG,ATAGGCATGAAG,ATAGGCATGCAG,ATAGGCATGGAG,ATAGGCATGTCG,ATAGGCATGTTG,ATAGGCGTGTAG,ATTGGCATGTAG,GTAGGCATGTAG	227	1,1,1,1,1,4,1,2,1
Lib10^3 3.3 ng	ATAGGTAATATC	ATAGCTAATATC,ATAGGTAGTATC,CTAGGTAATATC,GTAGGTAATATC	236	1,2,1,1
Lib10^3 3.3 ng	ATAGTGCTGTGC	ATAGTCCTGTGC,ATAGTGCTGAGC,ATTGTGCTGTGC,TTAGTGCTGTGC	303	1,1,1,2
Lib10^3 3.3 ng	ATAGTGGGTTGT	ATAGAGGGTTGT,ATAGGGGGTTGT,ATAGTGGGCTGT,ATAGTGGGGTGT,ATAGTGGGTTGG,ATAGTGGTTTGT	346	1,1,1,6,1,1
Lib10^3 3.3 ng	ATAGTTGCGAGC	ATAGATGCGAGC,ATAGGTGCGAGC,ATAGTNGCGAGC,ATAGTTCCGAGC,ATAGTTGCCAGC,ATAGTTGCGCGC,ATAGTTGCGGGC,ATAGTTGCGTGC,ATTGTTGCGAGC,GTAGTTGCGAGC	342	2,1,1,1,1,2,2,10,1,1
Lib10^3 3.3 ng	ATAGTTTCCACA	TTAGTTTCCACA	57	1
Lib10^3 3.3 ng	ATATCAAGACCG	ATAGCAAGACCG,ATATCAAGAACG,ATATCAAGACCC,ATATCAAGGCCG,ATATCAAGTCCG,ATATCATGACCG	314	1,1,1,1,11,1
Lib10^3 3.3 ng	ATATCCCAATCT	ATAACCCAATCT,ATATCCCAACCT,ATATCCCAGTCT,ATATCCGAATCT	143	1,1,1,1
Lib10^3 3.3 ng	ATATCTCGGAGG	ACATCTCGGAGG,ATATCTCAGAGG,ATATCTCCGAGG,ATATCTCGGAGT,ATATCTCGGCGG,ATATCTCGGGGG,ATATCTCGGTGG,ATATCTCNGAGG	192	1,1,1,1,1,3,3,1
Lib10^3 3.3 ng	ATATCTTTGGGA	ATAGCTTTGGGA,ATATCTTAGGGA,ATATCTTTGGAA,ATATCTTTGGCA,ATATCTTTGGGG,ATATCTTTGGGT,ATTTCTTTGGGA	160	1,1,1,1,2,1,1
Lib10^3 3.3 ng	ATATGTACATCT	ATATGTACACCT,ATATGTACAGCT,ATATGTACATCC,ATATGTACATCG,ATATGTACATGT,ATATGTATATCT,ATTTGTACATCT	164	2,2,1,1,1,1,1
Lib10^3 3.3 ng	ATATTGGTATTT		171
Lib10^3 3.3 ng	ATCAGATTCAAG	ATCAGATTCACG	37	1
Lib10^3 3.3 ng	ATCATTGTCTGA	ATCATTGTCTGT	73	1
Lib10^3 3.3 ng	ATCCCTTATTTG	ATCCCCTATTTG,ATCCCNTATTTG,ATCCCTTATATG,ATCCTTTATTTG,ATCGCTTATTTG	249	1,1,1,1,1
Lib10^3 3.3 ng	ATCCGGACGGAA	AACCGGACGGAA,ATCCGGACGAAA,ATCCGGACGGAG,ATCCGGACGGGA,ATCCGGGCGGAA,ATCCGGTCGGAA	203	1,1,1,1,1,5
Lib10^3 3.3 ng	ATCCGTTCTGGC	AGCCGTTCTGGC,ATCCGATCTGGC,ATCCGGTCTGGC,ATCCGTTCCGGC	213	1,1,1,1
Lib10^3 3.3 ng	ATCGAAACCGTT	ATCGAAACCGAT,ATCGAAACCGTG,ATCGAAANCGTT,ATCGGAACCGTT,ATCGTAACCGTT	145	1,1,1,2,2
Lib10^3 3.3 ng	ATCGAATTACAT	ATCGAATTAGAT,ATTGAATTACAT	121	1,1
Lib10^3 3.3 ng	ATCGCGAGAATA	ATCGCGAGGATA,ATCGCGGGAATA,ATCGTGAGAATA	104	1,1,1
Lib10^3 3.3 ng	ATCTCACACTGG	ATCTCACACAGG,ATCTCACACTGA,ATCTCACACTGC,ATCTCACCCTGG,TTCTCACACTGG	269	1,1,2,1,1
Lib10^3 3.3 ng	ATCTGCCTTTTA	AGCTGCCTTTTA,ATCTGCCTTATA,ATCTGCCTTTAA,ATCTGGCTTTTA,ATCTGNCTTTTA,ATCTTCCTTTTA,ATTTGCCTTTTA	243	1,1,1,1,1,1,2
Lib10^3 3.3 ng	ATCTGGTCGATT	AACTGGTCGATT,ATCTGGNCGATT,ATCTGGTCGAAT,ATCTGGTCGATG	199	1,1,1,1
Lib10^3 3.3 ng	ATCTGTTAAGTC	AACTGTTAAGTC,ATCTGATAAGTC,ATCTGTTAACTC,ATCTGTTGAGTC,ATCTGTTNAGTC	283	1,2,1,1,1
Lib10^3 3.3 ng	ATCTTCCTCCTA	ACCTTCCTCCTA,ATCNTCCTCCTA	185	2,1
Lib10^3 3.3 ng	ATCTTGTGTTGC	AGCTTGTGTTGC,ATCTTCTGTTGC,ATCTTGTGATGC,ATCTTGTGGTGC,ATGTTGTGTTGC	250	1,1,2,1,1
Lib10^3 3.3 ng	ATCTTTTGGTCG	ANCTTTTGGTCG,ATCTTTTGGTAG	171	1,1
Lib10^3 3.3 ng	ATGAATTGGCAT	AAGAATTGGCAT,ATGAATCGGCAT,ATGAATNGGCAT,ATGAATTCGCAT,ATGAATTGACAT,ATGAGTTGGCAT	282	1,1,1,1,1,1
Lib10^3 3.3 ng	ATGAGGATGTGC	ATGAGGACGTGC,ATGAGGANGTGC,ATGAGGATGAGC,ATGAGGGTGTGC,ATGAGGNTGTGC,ATGAGGTTGTGC,ATGAGTATGTGC,ATGCGGATGTGC,ATGTGGATGTGC	289	1,1,1,2,1,4,1,2,1
Lib10^3 3.3 ng	ATGAGGTCGGCA	ATGAGGTCGGCT	79	1
Lib10^3 3.3 ng	ATGAGTGCGGCA	AAGAGTGCGGCA,ATGAGTGCGACA,ATGAGTGCGCCA,ATGAGTGGGGCA,ATGAGTGTGGCA,ATGGGTGCGGCA,ATGTGTGCGGCA	256	1,1,2,1,1,3,3
Lib10^3 3.3 ng	ATGATGTGGTTT	ATGATCTGGTTT,ATGATGTGGTGT,ATGATGTTGTTT,ATGGTGTGGTTT	161	1,1,1,1
Lib10^3 3.3 ng	ATGATTCGAAGG	ATGAGTCGAAGG,ATGATACGAAGG,ATGATTCGAAGT,ATGATTCGACGG,ATGATTCGATGG,ATGATTCGTAGG,ATGATTCNAAGG,ATGATTNGAAGG,ATGATTTGAAGG,ATGGTTCGAAGG,ATGTTTCGAAGG	336	1,1,1,1,1,3,1,1,1,1,2
Lib10^3 3.3 ng	ATGCATTGTTTC	AAGCATTGTTTC,ATGCATTCTTTC,ATGCATTGATTC,ATGCATTGTCTC,ATGCGTTGTTTC,TTGCATTGTTTC	282	1,1,1,1,2,1
Lib10^3 3.3 ng	ATGCGCCACATG	AAGCGCCACATG,ATGCGCCACAAG,ATGCGCCACCTG,ATGCGCCACGTG,ATGCGCCCCATG,ATGCGCCTCATG,ATGCGTCACATG	269	1,1,1,1,1,2,1
Lib10^3 3.3 ng	ATGGAATTTCGT	ATGGAATTTGGT,ATGGGATTTCGT	135	1,1
Lib10^3 3.3 ng	ATGGACCGGCGT	AGGGACCGGCGT,ATGGACCAGCGT,ATGGACCGGCGC,ATGGCCCGGCGT,ATGGGCCGGCGT,ATGGTCCGGCGT	268	1,1,1,1,4,7
Lib10^3 3.3 ng	ATGGACTTGGGT	ATGCACTTGGGT,ATGGACTNGGGT,ATGGACTTGCGT,ATGGACTTGGGG,ATGGACTTTGGT,ATGGTCTTGGGT,TTGGACTTGGGT	361	1,1,1,1,1,2,1
Lib10^3 3.3 ng	ATGGATCGACGT	AAGGATCGACGT,ATGGATCAACGT,ATGGATCCACGT,ATGGATCGACGA,ATGGATCGTCGT,ATGGGTCGACGT,ATGGTTCGACGT,ATGTATCGACGT	240	1,1,1,1,7,2,2,1
Lib10^3 3.3 ng	ATGGCTTCGTCC	ATGGCTTCGNCC	50	1
Lib10^3 3.3 ng	ATGGGATCTGGT	ATGGCATCTGGT,ATGGGAGCTGGT,ATGGGATCTGAT,ATGGGATCTGCT,ATGGGCTCTGGT,ATGGGGTCTGGT,ATGGGTTCTGGT,ATGNGATCTGGT	259	1,1,1,1,1,1,1,1
Lib10^3 3.3 ng	ATGGGTTTCTCG	ATGAGTTTCTCG,ATGGATTTCTCG,ATGGCTTTCTCG,ATGGGATTCTCG,ATGGGGTTCTCG,ATGGGTCTCTCG,ATGGGTTTCCCG,ATGGTTTTCTCG,ATTGGTTTCTCG,CTGGGTTTCTCG	246	2,1,2,1,1,1,1,1,1,1
Lib10^3 3.3 ng	ATGGTCAACACC	ATGCTCAACACC,ATGGACAACACC,ATGGTCAACAGC	136	2,1,2
Lib10^3 3.3 ng	ATGGTCTTGTTC	ATGGGCTTGTTC,ATGGTCTTGATC,ATGGTCTTGGTC,ATGGTCTTGTCC,TTGGTCTTGTTC	144	1,2,2,1,1
Lib10^3 3.3 ng	ATGGTTGAACTT	ACGGTTGAACTT,ATGGATGAACTT,ATGGTAGAACTT,ATGGTGGAACTT,ATGGTTGAACGT,ATGGTTGAACTC,ATGGTTGGACTT,ATGGTTNAACTT	185	1,1,1,1,1,1,1,1
Lib10^3 3.3 ng	ATGTAGGACTGA	ATGGAGGACTGA,ATGTAGGACTGC,ATGTAGGACTGG,ATGTAGGACTGT,ATGTAGGACTTA,ATGTAGGTCTGA	343	2,1,5,4,1,2
Lib10^3 3.3 ng	ATGTCAGCAGTG	ACGTCAGCAGTG,ATGACAGCAGTG,ATGCCAGCAGTG,ATGTCAACAGTG,ATGTCAGCAGGG,ATGTCAGCAGTT,ATGTCAGCTGTG,ATGTCAGGAGTG,ATGTCAGTAGTG,GTGTCAGCAGTG	332	1,1,1,1,2,1,2,1,1,1
Lib10^3 3.3 ng	ATGTCGCCTAGA	ACGTCGCCTAGA,ATGACGCCTAGA,ATGNCGCCTAGA,ATGTCGCCTACA,ATGTCGCCTAGC,ATGTCGCCTAGG,ATGTCGCCTAGT,ATGTCGCGTAGA,ATGTCGGCTAGA,ATGTCGTCTAGA,GTGTCGCCTAGA	317	1,1,1,1,1,3,1,1,1,1,1
Lib10^3 3.3 ng	ATGTCTGGAATT	ATGTCTCGAATT,ATGTCTGGAAAT,ATGTCTGGCATT	85	1,1,1
Lib10^3 3.3 ng	ATGTGCCAGCTT	AAGTGCCAGCTT,ATGTGCCACCTT,ATGTGCCAGCAT,ATGTGCCAGCGT,ATGTGCCAGCTC,ATGTGCCTGCTT,ATGTGCTAGCTT	269	1,1,1,1,1,1,1
Lib10^3 3.3 ng	ATGTGTGCTAAT	AAGTGTGCTAAT,ATGAGTGCTAAT,ATGTGGGCTAAT,ATGTGTGATAAT,ATGTGTGTTAAT	249	2,2,1,1,1
Lib10^3 3.3 ng	ATGTTCCATCTT	ATATTCCATCTT,ATGATCCATCTT,ATGTTCCATCCT	253	1,2,1
Lib10^3 3.3 ng	ATGTTCTATAAT	ATGTTCNATAAT,ATGTTTTATAAT,ATTTTCTATAAT	155	1,1,2
Lib10^3 3.3 ng	ATGTTGTTTGTA	ATGTCGTTTGTA,ATGTTGGTTGTA,ATGTTGTATGTA,ATGTTGTTTCTA,ATGTTGTTTGTT	134	1,1,1,1,1
Lib10^3 3.3 ng	ATGTTTAGGCCG	ATGATTAGGCCG,ATGTTTAGGACG,ATGTTTAGGCCA,ATGTTTAGGCCC,ATGTTTAGGGCG,ATGTTTTGGCCG	252	1,1,1,2,1,1
Lib10^3 3.3 ng	ATTAACTTAGGG	ATAAACTTAGGG,ATCAACTTAGGG,ATTAACTTATGG,ATTAACTTTGGG,ATTATCTTAGGG	242	1,1,1,1,1
Lib10^3 3.3 ng	ATTAATTAACTA	ATGAATTAACTA,ATTAATTAACCA	170	1,1
Lib10^3 3.3 ng	ATTACGAGTATC	ATTACGTGTATC	114	1
Lib10^3 3.3 ng	ATTAGATCCCCT	ACTAGATCCCCT,AGTAGATCCCCT,ATAAGATCCCCT,ATTAGATCCCAT,ATTAGATCCTCT,ATTAGCTCCCCT,ATTAGGTCCCCT,ATTAGTTCCCCT,ATTTGATCCCCT	197	1,1,1,1,1,1,2,3,1
Lib10^3 3.3 ng	ATTAGCATATCC	ATTAGCATTTCC,ATTGGCATATCC	171	2,1
Lib10^3 3.3 ng	ATTAGGGAGTGG	ACTAGGGAGTGG,ATTACGGAGTGG,ATTAGGGAGTAG,ATTAGGGGGTGG,ATTAGGGNGTGG,ATTAGGGTGTGG	228	1,1,1,2,1,1
Lib10^3 3.3 ng	ATTATAGTGGAT	ATTAAAGTGGAT,ATTATAGTGGCT,ATTATANTGGAT,ATTATGGTGGAT,ATTATTGTGGAT	261	1,1,1,1,1
Lib10^3 3.3 ng	ATTCATAGGGGG	ATCCATAGGGGG,ATTCATTGGGGG,ATTGATAGGGGG,TTTCATAGGGGG	204	1,1,1,1
Lib10^3 3.3 ng	ATTCCCTACCAG	ATTCCCTACCTG	161	1
Lib10^3 3.3 ng	ATTCCGAGTTGA	ATTCCAAGTTGA,ATTCCCAGTTGA,ATTCCGACTTGA,ATTCCGAGATGA,ATTCCGAGTTGG,ATTCCGAGTTGT,ATTCCGGGTTGA,ATTCCGTGTTGA	218	3,1,1,1,1,2,3,5
Lib10^3 3.3 ng	ATTCTAGGACTG	ATTCTACGACTG,ATTCTAGAACTG,ATTCTAGGACGG,ATTCTAGGANTG,ATTCTAGGCCTG,ATTCTAGGGCTG,ATTCTAGGTCTG,ATTCTAGTACTG,ATTCTCGGACTG,ATTTTAGGACTG	309	1,1,1,1,1,1,4,2,1,1
Lib10^3 3.3 ng	ATTCTATGGGGG	ATCCTATGGGGG,ATTCTAGGGGGG,ATTCTATGGGGA,ATTCTATGTGGG,ATTCTCTGGGGG,ATTCTNTGGGGG	231	1,1,1,1,1,1
Lib10^3 3.3 ng	ATTCTCGTGCTA	ATTCCCGTGCTA,ATTCTCGGGCTA,ATTCTCGTACTA,ATTCTCGTGCTT	147	1,1,1,1
Lib10^3 3.3 ng	ATTGATGCGCGT	ATTGATACGCGT,ATTGATGCGCGA,ATTGCTGCGCGT,ATTGGTGCGCGT,ATTGTTGCGCGT,GTTGATGCGCGT	277	1,1,2,2,2,1
Lib10^3 3.3 ng	ATTGCTCCATTT	ATTGCACCATTT,ATTGCGCCATTT,ATTGCTCCATGT	269	1,1,1
Lib10^3 3.3 ng	ATTGGACGATTT	ATTGGACCATTT,ATTGGACGTTTT,ATTGGACTATTT,ATTGGATGATTT,ATTGGTCGATTT,TTTGGACGATTT	210	2,1,1,1,1,1
Lib10^3 3.3 ng	ATTGGGGTCTTT	ATTGAGGTCTTT,ATTGGGGTCATT,ATTGGGGTCTTC,ATTGTGGTCTTT	246	1,1,1,2
Lib10^3 3.3 ng	ATTGGTAGTCGC	ATTGGAAGTCGC,ATTGGGAGTCGC,ATTNGTAGTCGC	90	1,1,1
Lib10^3 3.3 ng	ATTGGTGCACCT	ATTCGTGCACCT,ATTGATGCACCT	203	1,2
Lib10^3 3.3 ng	ATTGTGGGTCAC	ATAGTGGGTCAC,ATTGCGGGTCAC,ATTGTAGGTCAC,ATTGTGGCTCAC,ATTGTGGGACAC,ATTGTGGGGCAC,ATTGTGNGTCAC,ATTGTGTGTCAC	238	1,1,1,2,1,1,1,1
Lib10^3 3.3 ng	ATTGTTGTTTAT	ATTGTCGTTTAT,ATTGTGGTTTAT,ATTGTTGCTTAT,ATTGTTGTATAT,ATTGTTGTGTAT,ATTGTTGTTGAT,GTTGTTGTTTAT	158	1,1,1,2,2,1,1
Lib10^3 3.3 ng	ATTTCGTCTTTT	ATTTCGGCTTTT,ATTTCGTCTTCT,ATTTCGTGTTTT	229	1,1,1
Lib10^3 3.3 ng	ATTTGACTGGCG	ATCTGACTGGCG,ATTTGACCGGCG,ATTTGACTGCCG,ATTTGGCTGGCG,ATTTGTCTGGCG,ATTTNACTGGCG	147	1,1,1,2,3,1
Lib10^3 3.3 ng	ATTTGGCTGAAT	AGTTGGCTGAAT,ATTCGGCTGAAT,ATTTGGCNGAAT	138	1,1,1
Lib10^3 3.3 ng	ATTTTCTAACTC	ATGTTCTAACTC,ATTTTCTACCTC,ATTTTNTAACTC	142	1,1,1
Lib10^3 3.3 ng	ATTTTTAGCGTT	ATATTTAGCGTT,ATTTTTAGCCTT,ATTTTTAGCGTA,ATTTTTAGCGTG,ATTTTTANCGTT	178	1,1,1,1,1
Lib10^3 3.3 ng	ATTTTTGCTGTC	ATTTGTGCTGTC,ATTTTNGCTGTC,ATTTTTGCTATC,ATTTTTGCTGCC,ATTTTTGCTGGC	326	1,1,1,1,1
Lib10^3 3.3 ng	ATTTTTTAGATT	ATTTTTTAGAGT	113	1
Lib10^3 3.3 ng	CAAATCTATGTG	CAAATCTAAGTG,CAAATCTATGAG,CAAATNTATGTG,CAATTCTATGTG,CATATCTATGTG	246	1,1,1,1,1
Lib10^3 3.3 ng	CAACATGCCTTC	CAACANGCCTTC	83	1
Lib10^3 3.3 ng	CAACGGAACTGT	CAACGGAACTGG,CAACGGCACTGT,CAACGGGACTGT	211	1,1,2
Lib10^3 3.3 ng	CAACTAGTTCTG	CAACTAGTTCTA,CAACTTGTTCTG,CAAGTAGTTCTG,CAGCTAGTTCTG	238	1,1,1,1
Lib10^3 3.3 ng	CAAGCAACAATT	CAAGCATCAATT	80	1
Lib10^3 3.3 ng	CAAGCGATAGGA	CAAGCGATAGAA,CAAGCGGTAGGA,CAAGCGTTAGGA,CATGCGATAGGA	288	1,2,1,1
Lib10^3 3.3 ng	CAAGTGGTTCGT	CAAGTGGATCGT,CAAGTGGTTCGC,CAGGTGGTTCGT	165	1,1,1
Lib10^3 3.3 ng	CAATGCCGCTAC	CAATGCCGCCAC	44	1
Lib10^3 3.3 ng	CAATTTGAAATT	CAAATTGAAATT,CAATGTGAAATT,CAATTTCAAATT,CAATTTGAAAGT,CAATTTGAAATC,CAATTTGAAGTT,CAATTTGGAATT,CAGTTTGAAATT	316	1,1,1,1,1,1,1,1
Lib10^3 3.3 ng	CACACCGTCGTT	CACACAGTCGTT,CACACCGTCGTA,CACACCGTCGTC,CACACCGTCGTG,CACACCGTTGTT,CACACCNTCGTT,CTCACCGTCGTT	356	1,3,1,2,1,1,1
Lib10^3 3.3 ng	CACACTCCGAGT	CACACCCCGAGT,CACACTCCGACT,CACACTCCGGGT,CACACTCCGTGT,CACACTCNGAGT,CACATTCCGAGT,CACCCTCCGAGT	330	1,1,6,7,1,2,1
Lib10^3 3.3 ng	CACATACGTGGA	CACATACGGGGA,CACATACGTGAA,CACATACGTGGG,CACATACNTGGA,CACATATGTGGA,CACATCCGTGGA,CTCATACGTGGA	231	3,1,1,1,1,1,1
Lib10^3 3.3 ng	CACATGGAGAAG	CACAAGGAGAAG,CACATGCAGAAG,CACATGGAAAAG,CACATGGAGAAT,CACATGGAGATG,CACATGGAGCAG,CACATGGAGGAG,CACATGGAGTAG,CACATGGGGAAG,CACATGGTGAAG,CTCATGGAGAAG	311	1,1,1,1,2,1,1,3,1,1,1
Lib10^3 3.3 ng	CACATGTTGTAT	CACATCTTGTAT,CACATGTTGTAA,CACATNTTGTAT,CTCATGTTGTAT	129	1,1,1,1
Lib10^3 3.3 ng	CACGACGTGCCA	CACCACGTGCCA,CACGGCGTGCCA,CACGTCGTGCCA,GACGACGTGCCA	155	1,1,1,1
Lib10^3 3.3 ng	CACGCCTTAATA	CAAGCCTTAATA,CACACCTTAATA,CACGACTTAATA,CACGCCTTAACA,CACGCCTTAAGA,CACGCCTTACTA,CACGCCTTAGTA,CACNCCTTAATA,CGCGCCTTAATA,GACGCCTTAATA	345	1,1,1,1,1,1,2,1,1,1
Lib10^3 3.3 ng	CACGTAATTTGT	CACGTAATATGT,CACGTAATTTGG,CACGTATTTTGT	204	2,3,1
Lib10^3 3.3 ng	CACTATACAATT	CACTAGACAATT,CACTATACAAAT,CACTATACGATT,GACTATACAATT	145	1,1,1,1
Lib10^3 3.3 ng	CACTTGCTCACT	CACTTGGTCACT,CAGTTGCTCACT,CTCTTGCTCACT	281	1,2,1
Lib10^3 3.3 ng	CAGAGAAGACTA	CAGAGAAGTCTA,CAGAGAGGACTA,CAGAGATGACTA,CAGAGCAGACTA,CAGAGTAGACTA,CAGGGAAGACTA	157	1,2,1,1,3,1
Lib10^3 3.3 ng	CAGATGTTTACT	CACATGTTTACT,CAGATGGTTACT,CAGATGTATACT,CAGATGTTTACG,CAGATGTTTTCT,CAGCTGTTTACT,CAGGTGTTTACT	362	2,1,1,1,1,1,3
Lib10^3 3.3 ng	CAGATTGGTGGC	CACATTGGTGGC,CAGAGTGGTGGC,CAGATTGGAGGC,CAGATTGGGGGC,CAGATTGGTCGC,CAGATTGGTGTC,CAGATTGNTGGC,CAGCTTGGTGGC,CAGNTTGGTGGC	395	1,1,1,1,1,1,1,1,1
Lib10^3 3.3 ng	CAGCACAGCTTA	CAGCACAGTTTA,CAGCACNGCTTA	253	1,1
Lib10^3 3.3 ng	CAGCCAATATGC	CAGCCAANATGC,CAGCCAATAAGC,CAGCTAATATGC,CAGNCAATATGC,CGGCCAATATGC,CTGCCAATATGC	213	2,1,1,1,1,1
Lib10^3 3.3 ng	CAGCCGTTAAGT	CAGCCGATAAGT,CAGCCGCTAAGT,CAGCCGGTAAGT,CAGCCGTAAAGT,CAGCCGTCAAGT,CAGCCGTGAAGT,CAGCCGTTAATT,CAGCCGTTATGT,CAGCTGTTAAGT,CTGCCGTTAAGT	317	1,1,2,1,1,2,1,1,1,1
Lib10^3 3.3 ng	CAGCTCCGTTTG	CAACTCCGTTTG,CAGCTCCGTCTG,CAGCTCCNTTTG,CAGCTCTGTTTG	175	1,2,1,1
Lib10^3 3.3 ng	CAGCTCTTCCCT	CCGCTCTTCCCT	138	1
Lib10^3 3.3 ng	CAGCTTGTAAGA	CAGCCTGTAAGA,CAGCTTGCAAGA,CAGCTTGTAAGT,CAGCTTGTATGA,CTGCTTGTAAGA	232	1,1,2,1,1
Lib10^3 3.3 ng	CAGGCCGACTCG	CAGGCCGACTCT,CAGGCCGAGTCG,CAGGCCGCCTCG,CAGGCCGTCTCG	68	1,1,1,1
Lib10^3 3.3 ng	CAGGCTGCTTCA	CAGGCTGGTTCA,CAGGCTGTTTCA,CAGNCTGCTTCA	231	1,1,1
Lib10^3 3.3 ng	CAGGGGTCTACG	CAGGGGACTACG,CAGGGGTCTGCG,CAGGGGTTTACG,CTGGGGTCTACG	263	1,1,1,1
Lib10^3 3.3 ng	CAGGTCCAATTT	CAGGCCCAATTT,CAGGTCCAAATT,CAGGTCCNATTT,CAGGTCTAATTT,GAGGTCCAATTT	198	1,1,2,1,1
Lib10^3 3.3 ng	CAGGTGTATTAT	CAGGTGCATTAT,CAGGTNTATTAT,CTGGTGTATTAT	244	1,1,2
Lib10^3 3.3 ng	CAGGTTCTTGGA	CAGGGTCTTGGA,CAGGTTCTAGGA,CAGGTTCTCGGA,CAGGTTCTTGGG,CAGGTTCTTGGT	187	2,1,1,2,1
Lib10^3 3.3 ng	CAGTCGCAAGAC	CACTCGCAAGAC,CAGACGCAAGAC,CAGGCGCAAGAC,CAGTCGCAAGTC,CAGTCTCAAGAC	256	2,1,1,2,1
Lib10^3 3.3 ng	CAGTGAGTCTAG	CAGGGAGTCTAG,CAGTGAGNCTAG,CAGTGAGTCAAG,CAGTGANTCTAG,CAGTGGGTCTAG,CAGTGTGTCTAG	254	2,2,1,1,3,3
Lib10^3 3.3 ng	CAGTGCACGCCA	CAGAGCACGCCA,CAGCGCACGCCA,CAGGGCACGCCA,CAGTACACGCCA,CAGTCCACGCCA,CAGTGCACGCCC,CAGTGCACGCCG,CAGTGCANGCCA,CGGTGCACGCCA	288	2,1,1,1,1,1,1,1,1
Lib10^3 3.3 ng	CAGTGGATAGAT	CAGTGGAAAGAT	118	1
Lib10^3 3.3 ng	CAGTTGCTGGAC	CAGATGCTGGAC,CAGCTGCTGGAC,CAGGTGCTGGAC,CAGTGGCTGGAC,CAGTTGCTGGTC,CAGTTGCTGTAC,CGGTTGCTGGAC,CTGTTGCTGGAC	295	1,2,1,1,2,1,3,2
Lib10^3 3.3 ng	CAGTTGTAGCTC	CAGTAGTAGCTC,CAGTTATAGCTC,CAGTTGCAGCTC,CAGTTGGAGCTC	172	1,1,1,1
Lib10^3 3.3 ng	CATAAATTGCGA	CATAAATGGCGA,CATAAATTGCGT,CATATATTGCGA	117	1,1,1
Lib10^3 3.3 ng	CATAGGATGTAT	CATAGGATGGAT,CATAGGTTGTAT	186	1,1
Lib10^3 3.3 ng	CATATGCCCCTG	CATATGCCCCAG,CATATGCCCCCG,CATATGCNCCTG,CATATTCCCCTG,GATATGCCCCTG	265	1,1,1,1,1
Lib10^3 3.3 ng	CATATTCCAGGT	CATATTCCAGGA,CATATTCCAGGG,CATATTCCTGGT,TATATTCCAGGT	79	1,1,1,1
Lib10^3 3.3 ng	CATCCCACGTCG	CATCCCACGACG,CATCCCACGTCC,CATCCCATGTCG,CATCCCGCGTCG,CATCCCTCGTCG	251	1,1,2,1,1
Lib10^3 3.3 ng	CATCGCGGTGAT	CATCGCGGGGAT,CATCGCGGTGGT,CATCGCGGTGTT,CATCGCGNTGAT,CATCGNGGTGAT,CATTGCGGTGAT,CCTCGCGGTGAT,CGTCGCGGTGAT,TATCGCGGTGAT	256	1,1,1,1,1,1,1,1,1
Lib10^3 3.3 ng	CATCTGCTGGCT	CATCTGCTGGTT	108	1
Lib10^3 3.3 ng	CATCTGGCGGAC	CATCCGGCGGAC,CATCTGGCGGGC	175	1,1
Lib10^3 3.3 ng	CATGATAGGTAT	CAAGATAGGTAT,CATGAGAGGTAT,CATGATACGTAT,CTTGATAGGTAT	145	1,1,1,2
Lib10^3 3.3 ng	CATGGCTTGACT	CACGGCTTGACT,CATGGCTTGGCT,CATGGCTTGTCT,CATNGCTTGACT	401	1,5,1,1
Lib10^3 3.3 ng	CATGTTCACGGC	CATGTACACGGC,CATGTNCACGGC,CATGTTCACGAC,CATGTTCACGTC,CATGTTCTCGGC,CATGTTGACGGC,CCTGTTCACGGC	309	1,1,1,1,1,2,1
Lib10^3 3.3 ng	CATTAAGCACGG	CATCAAGCACGG,CATTAACCACGG,CATTAAGCACGA,CATTACGCACGG,CATTATGCACGG,CATTGAGCACGG,CATTTAGCACGG	250	1,1,1,2,1,1,3
Lib10^3 3.3 ng	CATTACTTCGAA	CATAACTTCGAA,CATTACNTCGAA,CATTACTTCGAT,CATTACTTCGTA,CATTAGTTCGAA,CATTANTTCGAA	211	1,1,1,2,2,1
Lib10^3 3.3 ng	CATTATATGGGA	CATTATATGAGA,CATTATATGGAA,CATTATATGGTA	146	1,1,1
Lib10^3 3.3 ng	CATTCTGCGACG	CATNCTGCGACG,CATTCGGCGACG,CATTCTCCGACG,CATTCTGCGCCG,CATTCTGCGGCG,CATTCTGCGTCG,CATTCTGGGACG,CATTCTGTGACG,CTTTCTGCGACG	298	2,1,1,1,4,3,1,1,1
Lib10^3 3.3 ng	CATTGGCATGCA	CATTGGCATACA,CATTGGCATGCT,CATTGGCNTGCA,CATTGGCTTGCA	220	1,1,1,1
Lib10^3 3.3 ng	CATTTAGCTTCG	CATCTAGCTTCG,CATTTAGCTTCT,CATTTANCTTCG	94	1,1,1
Lib10^3 3.3 ng	CATTTGTTGTCT	CATTTGATGTCT,CATTTGGTGTCT,CATTTGTTGACT,CATTTGTTGTCC	193	1,2,1,1
Lib10^3 3.3 ng	CATTTTGGGTCC	CNTTTTGGGTCC	242	1
Lib10^3 3.3 ng	CCAAAGTCACTA	CCAAAGACACTA,CCAAAGTNACTA,CCAAAGTTACTA,CCAAGGTCACTA,CTAAAGTCACTA	195	1,1,1,2,1
Lib10^3 3.3 ng	CCAAATGGTAAG	CCAAATGGTACG,CCAAATGGTAGG,CCAAATGGTATG,CCAAATGTTAAG,CCAAATNGTAAG,GCAAATGGTAAG	236	1,3,1,1,2,1
Lib10^3 3.3 ng	CCAAGTTGTTAA	CCAAATTGTTAA,CCAACTTGTTAA,CCAAGCTGTTAA,CCAAGTTGGTAA,CCAAGTTGTAAA,CCAAGTTGTCAA,CCTAGTTGTTAA,TCAAGTTGTTAA	252	1,1,1,4,4,2,1,1
Lib10^3 3.3 ng	CCACGGCTGGTA	CCACGGCTGCTA,CCTCGGCTGGTA	133	1,1
Lib10^3 3.3 ng	CCACGGTTGAGT	CCACGGATGAGT,CCACGGTGGAGT,CCACGGTNGAGT,CCACGGTTGGGT,CCACGGTTGTGT,CTACGGTTGAGT	249	2,1,1,2,7,1
Lib10^3 3.3 ng	CCACTCGGAGGC	CCACTCGCAGGC,CCACTCGGAGCC,CCACTCGGCGGC,CCACTCGGGGGC,CCACTCGGTGGC,CGACTCGGAGGC	199	1,1,1,1,2,1
Lib10^3 3.3 ng	CCACTGGGACAG	CCACTGGAACAG,CCACTGGGACAC,CCACTGGGACTG,CCACTGGGCCAG,CCACTGGGGCAG,CCACTGGGTCAG,CCACTGGTACAG,CCACTNGGACAG,CCACTTGGACAG,CGACTGGGACAG	323	1,1,2,1,1,3,1,1,1,1
Lib10^3 3.3 ng	CCAGATTTTTGG	CCAGATTTATGG,CCAGATTTTTGT,CCATATTTTTGG	228	2,3,1
Lib10^3 3.3 ng	CCAGGGCCTTGC	CCACGGCCTTGC,CCAGAGCCTTGC,CCAGGGCCTTCC,CCAGGGCCTTGG,CCAGGGCTTTGC,CCAGGGNCTTGC,CCAGTGCCTTGC	205	1,1,1,1,1,1,1
Lib10^3 3.3 ng	CCAGTTCCAAGA	CCAGATCCAAGA,CCAGTCCCAAGA,CCAGTTCNAAGA,CCTGTTCCAAGA	269	1,1,1,1
Lib10^3 3.3 ng	CCATATCGTTGG		120
Lib10^3 3.3 ng	CCATTGCCGGTT	CCATTGCCGCTT,CCATTGCCGGCT,CCATTGCCGGGT,CCATTGCTGGTT,CCATTGNCGGTT	102	1,1,1,2,1
Lib10^3 3.3 ng	CCATTGTTTGAT	CCATTATTTGAT,CCATTGTCTGAT,CCATTGTTTGCT,CCATTGTTTGGT,CTATTGTTTGAT,TCATTGTTTGAT	199	1,1,1,1,1,1
Lib10^3 3.3 ng	CCCACCTCTTCG	CACACCTCTTCG,CCCACCTNTTCG,CCCACGTCTTCG,CCCTCCTCTTCG	203	1,1,1,1
Lib10^3 3.3 ng	CCCAGGTTACGT	CCCAGGATACGT,CCCAGGTTACGA	132	1,1
Lib10^3 3.3 ng	CCCATATCGGAT		188
Lib10^3 3.3 ng	CCCATCAGGTAC	CCCATAAGGTAC,CCCATCAGGCAC,CCCATCAGGGAC,CCCATCAGGTAA,CCCATCAGGTAT,CCCATCTGGTAC,CCGATCAGGTAC	311	1,1,3,1,1,1,1
Lib10^3 3.3 ng	CCCCCTATAGCT	CACCCTATAGCT,CCCCATATAGCT,CCCCCTACAGCT,CCCCCTATAGGT	308	1,1,2,1
Lib10^3 3.3 ng	CCCCGACGCGTA	CCCCGACGCGAA,CCCCGCCGCGTA,CCCCGTCGCGTA	177	1,1,2
Lib10^3 3.3 ng	CCCCGGTCTGCT	CACCGGTCTGCT,CCCCGGGCTGCT,CCCCGGTTTGCT,CTCCGGTCTGCT	211	1,1,1,1
Lib10^3 3.3 ng	CCCGGTCAATTC	CCCGGACAATTC,CCCGGTCAACTC,CCCGGTCAATAC,CCCGGTCAATGC,CGCGGTCAATTC	91	1,1,1,1,1
Lib10^3 3.3 ng	CCCTACAACGCG	CCCNACAACGCG,CCCTACAACGAG,CCCTACAATGCG,CCCTACANCGCG,CCCTANAACGCG	251	1,1,1,1,1
Lib10^3 3.3 ng	CCCTCCGGTCAC	CCATCCGGTCAC,CCCTCCGGTCCC	106	1,1
Lib10^3 3.3 ng	CCCTGGTGCTAA	CCCTGGGGCTAA,CCCTGGTACTAA,CCCTGGTGCGAA,CCCTGGTGCTAG,CCCTGGTGCTCA,CCCTGGTGTTAA,CCCTTGTGCTAA,CGCTGGTGCTAA	316	1,1,1,1,1,1,1,1
Lib10^3 3.3 ng	CCCTGTATAGGA	CACTGTATAGGA,CCCNGTATAGGA,CCCTATATAGGA,CCCTGGATAGGA,CCCTGTATAGAA,CCCTGTATAGGT,CCTTGTATAGGA,CTCTGTATAGGA	110	1,1,1,2,1,1,1,1
Lib10^3 3.3 ng	CCCTGTGATGGC	CCCTGTCATGGC,CCCTGTGAAGGC	20	1,1
Lib10^3 3.3 ng	CCCTTCTTCAGA	CCCTCCTTCAGA	138	1
Lib10^3 3.3 ng	CCCTTTAACGTT	CCCTTTAACATT,CCCTTTAACGAT,CTCTTTAACGTT	182	1,1,1
Lib10^3 3.3 ng	CCGAATAGTCCA	CCGAATAGTCCC,TCGAATAGTCCA	271	1,1
Lib10^3 3.3 ng	CCGACATTAATT	CCGATATTAATT,CCGGCATTAATT,CCGTCATTAATT	143	1,1,2
Lib10^3 3.3 ng	CCGAGATATTCA	CCGAGATATCCA,CCGAGATATTTA,CCGTGATATTCA,TCGAGATATTCA	222	1,1,3,2
Lib10^3 3.3 ng	CCGATCAGACTA	CCGATAAGACTA,CCGATCAGTCTA,CCGGTCAGACTA,CCGTTCAGACTA,GCGATCAGACTA	149	1,1,1,1,1
Lib10^3 3.3 ng	CCGATCTACCCG	ACGATCTACCCG,CCGATCTACCCC,CCGATCTATCCG,TCGATCTACCCG	143	1,1,1,1
Lib10^3 3.3 ng	CCGCCGATCTAG	CCGCCGANCTAG,CCGCCGATCTCG,CCGCCGATCTGG,CCGCCGATCTTG,CCGCCGCTCTAG,CCGCCGGTCTAG,CTGCCGATCTAG	94	1,1,1,1,1,1,1
Lib10^3 3.3 ng	CCGCCTTTTAAT	CCGCNTTTTAAT	159	1
Lib10^3 3.3 ng	CCGCTATGCCGC	CCGCCATGCCGC,CCGCTAAGCCGC,CCGCTATNCCGC,CCGCTNTGCCGC,CCGGTATGCCGC	244	1,1,1,1,1
Lib10^3 3.3 ng	CCGGCCGTTCCG	CAGGCCGTTCCG,CCGGCCGTGCCG	168	1,1
Lib10^3 3.3 ng	CCGGGTTTGTTG	CCGGGGTTGTTG,CCGGGTATGTTG,CCGGGTTTGATG,CCGGGTTTGTGG	108	1,1,1,1
Lib10^3 3.3 ng	CCGGTCTTGTGC	CCGCTCTTGTGC,CCGGACTTGTGC,CCGGGCTTGTGC,CCGGTATTGTGC,CCGGTCTTGCGC,CCGGTCTTGGGC	289	1,1,1,2,1,2
Lib10^3 3.3 ng	CCGGTGGCTACA	CCGATGGCTACA,CCGGAGGCTACA,CCGGTGACTACA,CCGGTGGCAACA,CCGGTGGCTACT,CCGGTGGGTACA,CTGGTGGCTACA	264	1,1,2,2,1,1,1
Lib10^3 3.3 ng	CCGGTGTTGGAA	CCCGTGTTGGAA,CCGGCGTTGGAA,CCGGGGTTGGAA,CCGGTGTNGGAA,CCGGTGTTGAAA,CCGGTGTTGGAT,CCGGTGTTGGCA,CCGGTGTTGGGA	175	1,1,1,1,1,1,1,1
Lib10^3 3.3 ng	CCGTACGAACAG	CCGAACGAACAG,CCGTAAGAACAG,CCGTACGAAAAG,CCGTACGAACAC,CCGTACGAACCG,CCGTACGAACGG,CCGTACGGACAG,CCGTACGTACAG	199	1,1,1,1,1,1,2,4
Lib10^3 3.3 ng	CCGTACTCGTCC	CCGTACTCGACC,CCGTACTCGGCC,CCGTTCTCGTCC	149	1,1,1
Lib10^3 3.3 ng	CCGTAGCTACTA	CCGTAGCTAGTA	23	1
Lib10^3 3.3 ng	CCGTGAATCGTG	CCGTGAATCATG,CCGTGAATCGAG,CCGTGAATCGGG,CCGTGAGTCGTG,CCGTGGATCGTG	178	1,1,1,1,1
Lib10^3 3.3 ng	CCGTGTGTGAAC	CCGGGTGTGAAC,CCGTGTGTGCAC,CCGTGTGTGGAC,CCGTGTGTGTAC	318	1,3,1,2
Lib10^3 3.3 ng	CCTACCTTGCTT	CCTACCATGCTT	44	1
Lib10^3 3.3 ng	CCTAGCATGTTG	CCAAGCATGTTG,CCTAGAATGTTG,CCTAGCATGCTG,CCTAGCATGGTG,CCTTGCATGTTG	251	1,1,2,1,1
Lib10^3 3.3 ng	CCTATACTTCCA	CCTATACATCCA,CCTATACTTCTA	214	1,1
Lib10^3 3.3 ng	CCTCAACGGACT	CCTCAACAGACT,CCTCAACGCACT,CCTCAACGGCCT,CCTCAACGGGCT,CCTCAACGGTCT,CCTCAGCGGACT,CCTCATCGGACT,GCTCAACGGACT,TCTCAACGGACT	255	1,3,1,2,1,2,1,1,1
Lib10^3 3.3 ng	CCTCTGAGTCGT	CCTCTGAGACGT,CCTCTGAGGCGT,CCTCTGAGTCGG,CCTCTGGGTCGT,CCTCTGTGTCGT	150	2,1,2,2,2
Lib10^3 3.3 ng	CCTCTGGCTTTG		106
Lib10^3 3.3 ng	CCTGAAGTTTCT	CCTGAACTTTCT,CCTGAAGGTTCT,CCTGAAGTCTCT,CCTGAAGTTTCA,CCTGAAGTTTGT,CCTGACGTTTCT,CCTNAAGTTTCT,CTTGAAGTTTCT,TCTGAAGTTTCT	186	1,1,1,1,1,1,1,1,1
Lib10^3 3.3 ng	CCTGGAATGGGA	CCAGGAATGGGA,CCTGGAATGGGG,CCTGGTATGGGA,CCTGTAATGGGA	137	1,2,1,1
Lib10^3 3.3 ng	CCTGGCGGAGTT	CCTGGCGAAGTT	38	1
Lib10^3 3.3 ng	CCTGGTTGGATG	CCTGGATGGATG,CCTGGTGGGATG,CCTGGTTGGAGG,CCTGGTTGGCTG,CCTGGTTGGGTG,CCTGGTTGGTTG,CCTGGTTNGATG,CCTNGTTGGATG	328	1,1,1,1,6,5,1,1
Lib10^3 3.3 ng	CCTGTCGGTTCG	CCTGTCGGGTCG,CCTGTCGGTCCG,CCTGTCGGTTCC	241	2,1,1
Lib10^3 3.3 ng	CCTTAACCTAAG	CCTTAACCTACG,CCTTAACCTATG,CCTTAACCTTAG,CCTTATCCTAAG	227	2,4,1,1
Lib10^3 3.3 ng	CCTTAATGTCTC	CATTAATGTCTC,CCTTAATGACTC,CCTTAATGGCTC,CCTTANTGTCTC,GCTTAATGTCTC	254	1,1,1,1,1
Lib10^3 3.3 ng	CCTTCGCTCTGC		195
Lib10^3 3.3 ng	CCTTCTCCTCGA	CCTCCTCCTCGA,CCTTCTCCTCGG,CCTTCTCCTCGT,TCTTCTCCTCGA	212	1,3,2,1
Lib10^3 3.3 ng	CCTTCTCTGCTA	CCGTCTCTGCTA	223	1
Lib10^3 3.3 ng	CCTTCTGTGTGT	CCGTCTGTGTGT	183	1
Lib10^3 3.3 ng	CCTTGCGTCTCG	CCTTGCGTCTCT,CCTTGNGTCTCG	188	1,1
Lib10^3 3.3 ng	CCTTGGACACTT	CCTTGAACACTT,CCTTGCACACTT,CCTTGGACAGTT,CCTTGGGCACTT,CCTTGGTCACTT,CTTTGGACACTT	276	1,1,1,3,2,1
Lib10^3 3.3 ng	CCTTTACCGTTT	CCTTTAGCGTTT,GCTTTACCGTTT	98	1,1
Lib10^3 3.3 ng	CCTTTACGGGGT	CCTCTACGGGGT,CCTGTACGGGGT,CCTTTACAGGGT,CCTTTACGAGGT,CCTTTACGCGGT,CCTTTACGGGTT,CCTTTNCGGGGT,TCTTTACGGGGT	249	1,1,1,1,1,1,1,1
Lib10^3 3.3 ng	CCTTTGTGATTG	CATTTGTGATTG,CCTATGTGATTG,CCTCTGTGATTG,CCTGTGTGATTG,CCTTGGTGATTG,CCTTTGCGATTG,CCTTTGNGATTG,CCTTTGTGCTTG,CCTTTGTGTTTG,CGTTTGTGATTG,TCTTTGTGATTG	265	1,3,1,1,1,1,1,1,2,1,245
Lib10^3 3.3 ng	CCTTTTACCCCA		116
Lib10^3 3.3 ng	CCTTTTCCATTG	CCTNTTCCATTG,CCTTTGCCATTG,CCTTTTCCCTTG,CGTTTTCCATTG,GCTTTTCCATTG	205	1,2,1,1,1
Lib10^3 3.3 ng	CCTTTTTTATCA	CCTGTTTTATCA,CCTTATTTATCA	136	1,1
Lib10^3 3.3 ng	CCTTTTTTTTTC	CCTATTTTTTTC,CCTCTTTTTTTC,CCTGTTTTTTTC,CCTTTNTTTTTC,CCTTTTTTTTAC	162	2,1,1,1,2
Lib10^3 3.3 ng	CGAAATTAGGCG	CGAAATTACGCG,TGAAATTAGGCG	132	1,1
Lib10^3 3.3 ng	CGAACTTCGCGT	CGAACNTCGCGT,CGAACTNCGCGT,CGAACTTCGCGA,CGAACTTCGCGC,CGAACTTCTCGT,CGGACTTCGCGT,CGTACTTCGCGT	333	1,1,1,1,1,1,2
Lib10^3 3.3 ng	CGAATCCAAACG	CGAAACCAAACG,CGAATCCAAACA,CGAATCCAAGCG,CGAGTCCAAACG,CGCATCCAAACG,CGTATCCAAACG	271	1,1,1,1,1,1
Lib10^3 3.3 ng	CGAATGTTCTTA	CCAATGTTCTTA,CGAATCTTCTTA,CGAATGATCTTA,CGAATGTNCTTA,CGAATGTTCATA	262	2,1,3,1,2
Lib10^3 3.3 ng	CGACCTTTTGGT	CGACCTTATGGT,CGACCTTCTGGT,CGACTTTTTGGT,CGATCTTTTGGT,CGCCCTTTTGGT,CGGCCTTTTGGT,CGTCCTTTTGGT	162	2,1,1,1,1,1,1
Lib10^3 3.3 ng	CGACGTGCTAAG	CGACGAGCTAAG,CGACGGGCTAAG,CGACGNGCTAAG,CGACGTCCTAAG,CGACGTGCTAAA,CGACGTGCTACG,CGACGTGCTAGG,CGACGTGCTATG,CGCCGTGCTAAG,CGGCGTGCTAAG,CGTCGTGCTAAG	199	2,1,2,1,1,3,3,1,1,1,4
Lib10^3 3.3 ng	CGACTGTGTTTG	AGACTGTGTTTG,CCACTGTGTTTG,CGAATGTGTTTG,CGACTGGGTTTG,CGACTGTCTTTG,CGACTGTGATTG,CGACTGTGTATG,CGATTGTGTTTG,CGTCTGTGTTTG	251	1,1,1,1,1,1,1,1,5
Lib10^3 3.3 ng	CGAGAGTTGCCT	CGAGTGTTGCCT,CGGGAGTTGCCT,CGTGAGTTGCCT,GGAGAGTTGCCT	175	2,1,2,1
Lib10^3 3.3 ng	CGAGGAGGGGTT	CCAGGAGGGGTT,CGAGGAGGGCTT,CGAGGTGGGGTT,CGANGAGGGGTT,CGATGAGGGGTT,CGTGGAGGGGTT	255	1,2,2,1,1,2
Lib10^3 3.3 ng	CGAGGCGGCGAT	CGAGGCGGCCAT,CGAGGCGGCGGT,CGAGGCGGGGAT,CGAGGCGNCGAT,CGAGGCGTCGAT,CGAGGCNGCGAT,CGTGGCGGCGAT	160	1,2,4,1,1,1,4
Lib10^3 3.3 ng	CGAGTCTGCATC	CGAGGCTGCATC,CGAGTCTGCAGC,CGAGTCTGCTTC,CGCGTCTGCATC,CGGGTCTGCATC,CGTGTCTGCATC	259	2,1,1,1,4,6
Lib10^3 3.3 ng	CGATAGAAGCGC	CAATAGAAGCGC,CGANAGAAGCGC,CGATAGGAGCGC,CGATAGTAGCGC,CGTTAGAAGCGC,GGATAGAAGCGC	253	1,1,1,1,1,1
Lib10^3 3.3 ng	CGATCCGTTGCA	CGATCCGGTGCA,CGGTCCGTTGCA,CGTTCCGTTGCA	64	2,1,1
Lib10^3 3.3 ng	CGATCTTTTGCG		36
Lib10^3 3.3 ng	CGATTATAGGAT	CCATTATAGGAT,CGATTATAGGGT,CGATTGTAGGAT,CGCTTATAGGAT,CGGTTATAGGAT	259	1,1,1,1,1
Lib10^3 3.3 ng	CGATTCCGGTTG	CGANTCCGGTTG,CGATGCCGGTTG,CGATTCCAGTTG,CGATTCCGGGTG,CGTTTCCGGTTG	320	1,1,1,1,2
Lib10^3 3.3 ng	CGATTGAAGTTC	CCATTGAAGTTC,CGAATGAAGTTC,CGACTGAAGTTC,CGATTAAAGTTC,CGATTGAAGGTC,CGATTGCAGTTC,CGATTGGAGTTC,CGATTGTAGTTC,CGGTTGAAGTTC,CGTTTGAAGTTC,CTATTGAAGTTC,TGATTGAAGTTC	192	1,1,1,1,1,1,1,2,1,1,1,2
Lib10^3 3.3 ng	CGATTTCTTGAA	AGATTTCTTGAA,CGATGTCTTGAA,CGATTCCTTGAA,CGATTNCTTGAA,CGATTTCTTGAC,CGATTTCTTGCA,CGATTTCTTGGA,CGATTTCTTGTA,CGATTTTTTGAA,CGTTTTCTTGAA	214	1,1,1,1,1,1,1,1,1,1
Lib10^3 3.3 ng	CGATTTGCGTAA	CGATTTGCGTAG	35	1
Lib10^3 3.3 ng	CGCACCCGGAGT	CGCACCCCGAGT,CGCACCCGGACT,CGCACCCGGGGT,CGCACCCGGTGT,CGCTCCCGGAGT	179	1,1,1,1,1
Lib10^3 3.3 ng	CGCATGTTTCGT	CGCATGGTTCGT,CGCATGTTTCGA,CTCATGTTTCGT,GGCATGTTTCGT	238	1,1,1,1
Lib10^3 3.3 ng	CGCCCGCATATT	CGCCCGCATATG,CGCCCGCGTATT,CGCCCGNATATT,CGCCCTCATATT,CGTCCGCATATT	284	1,1,1,1,1
Lib10^3 3.3 ng	CGCCCTCTTCAA	AGCCCTCTTCAA,CCCCCTCTTCAA,CGACCTCTTCAA,CGCCCCCTTCAA,CGCCCTCTTGAA,CGCGCTCTTCAA	274	1,1,1,1,1,1
Lib10^3 3.3 ng	CGCCGTTGCGTT	CCCCGTTGCGTT,CGCCCTTGCGTT,CGCCGATGCGTT,CGCCGNTGCGTT,CGCCGTGGCGTT,CGCCGTTGAGTT,CGCCGTTGCGCT,CGCCGTTGCGGT	302	1,1,2,1,1,1,1,1
Lib10^3 3.3 ng	CGCCTTGGCTTA	CACCTTGGCTTA,CGCCTTGGCTTT	272	1,1
Lib10^3 3.3 ng	CGCGTGGTATAT	CGCGAGGTATAT	58	1
Lib10^3 3.3 ng	CGCTATCAATAG	CGCGATCAATAG,CGCTATCAATTG,CGCTATNAATAG	163	1,1,1
Lib10^3 3.3 ng	CGCTGATACGAC	CGCTGGTACGAC,CTCTGATACGAC,TGCTGATACGAC	119	1,1,1
Lib10^3 3.3 ng	CGCTTACTTCTT	CGCATACTTCTT,CGCCTACTTCTT,CGCGTACTTCTT,CGCTTACATCTT,CGCTTAGTTCTT,CGCTTGCTTCTT	166	7,4,1,1,1,1
Lib10^3 3.3 ng	CGCTTGTCCTTG	CGCATGTCCTTG,CGCCTGTCCTTG,CGCGTGTCCTTG	210	5,3,2
Lib10^3 3.3 ng	CGGACGTCCCCA	AGGACGTCCCCA,CGGACGTCCCTA,CGGATGTCCCCA,CGGGCGTCCCCA,CGGNCGTCCCCA,CGGTCGTCCCCA,CTGACGTCCCCA	194	1,1,1,1,1,4,1
Lib10^3 3.3 ng	CGGAGCTAGCCT	CCGAGCTAGCCT,CGGAGCTAGCGT,CGGCGCTAGCCT,CGGTGCTAGCCT,CTGAGCTAGCCT,GGGAGCTAGCCT	241	1,1,2,4,1,2
Lib10^3 3.3 ng	CGGATTTTGCCA	CAGATTTTGCCA,CGGATATTGCCA,CGGATCTTGCCA,CGGATTTAGCCA,CGGATTTTGCCT,CGGATTTTGCGA,CGGATTTTGCTA,CGGATTTTGTCA,CGGCTTTTGCCA,CGGGTTTTGCCA,CGGTTTTTGCCA,TGGATTTTGCCA	283	1,1,1,1,1,2,1,1,1,3,2,1
Lib10^3 3.3 ng	CGGCACACCTCC	CGGTACACCTCC	61	1
Lib10^3 3.3 ng	CGGCAGGATTAT	CGGCAGGATTCT,CGGCAGGATTTT,CGGCAGGGTTAT,CGGCTGGATTAT	186	1,1,2,1
Lib10^3 3.3 ng	CGGCAGGTGTTT	CGCCAGGTGTTT,CGGCAGGCGTTT,CGGCAGGGGTTT,CGGCAGGTATTT,CGGCAGGTGTAT,CGGCTGGTGTTT,CGGGAGGTGTTT,GGGCAGGTGTTT	186	1,1,1,1,1,1,1,1
Lib10^3 3.3 ng	CGGCCGTTGATT	CGGCCGATGATT,CGGCCGCTGATT,CGGCCGGTGATT,CGGCCGTAGATT,CGGCCGTTGAGT	156	2,1,1,1,1
Lib10^3 3.3 ng	CGGCGGGCGATG	CAGCGGGCGATG,CGGCGGGCGCTG,CGGCGGGCGGTG,CGGCGGGCGTTG,CGGCGTGCGATG,CGGGGGGCGATG,TGGCGGGCGATG	250	1,2,8,5,1,1,1
Lib10^3 3.3 ng	CGGCGTCACCAC	CCGCGTCACCAC,CGACGTCACCAC,CGGCATCACCAC,CGGCGTAACCAC,CGGCGTCTCCAC,CGGCGTNACCAC	288	1,1,1,1,1,1
Lib10^3 3.3 ng	CGGCTACTTCAT	CGACTACTTCAT,CGCCTACTTCAT,CGGCTAATTCAT,CGGCTACNTCAT,CGGCTACTTCTT,CGGCTANTTCAT,CGGCTTCTTCAT,CTGCTACTTCAT	227	1,1,1,1,1,1,1,1
Lib10^3 3.3 ng	CGGGATCGTTGA	CGGCATCGTTGA,CGGGAACGTTGA,CGGGATCATTGA,CGGGATCGATGA,CGGGATCGTAGA,CGGGATCGTGGA,CGGGATCGTTGG,CGGGATCGTTGT,CGGGATCNTTGA,CGGGGTCGTTGA	307	1,1,1,2,1,5,3,1,1,2
Lib10^3 3.3 ng	CGGGATGTATTG	CGGGTTGTATTG,CGGTATGTATTG,CTGGATGTATTG,GGGGATGTATTG	111	1,1,1,1
Lib10^3 3.3 ng	CGGGGACCCGCA	CGAGGACCCGCA,CGGGGACCCACA,CGGGGGCCCGCA,CGGGGTCCCGCA,CGGGTACCCGCA,CGGNGACCCGCA	152	1,1,3,7,1,1
Lib10^3 3.3 ng	CGGGGGGCCTTC	CGGGGGGCCTAC,CGGGGGGCCTTT,CGGGGGGCGTTC	260	1,1,1
Lib10^3 3.3 ng	CGGGGGTGTGGA	CGAGGGTGTGGA,CGGGGGGGTGGA,CGGGGGTATGGA,CGGGGGTGGGGA,CGGGGGTGTGAA,CGGGGGTGTGGG,CGGGTGTGTGGA,CGTGGGTGTGGA,CTGGGGTGTGGA	286	1,1,1,2,1,1,1,1,1
Lib10^3 3.3 ng	CGGGTTAGCTAC	CGGGATAGCTAC,CGGGCTAGCTAC,CGGGTTAGCTTC,CGTGTTAGCTAC	304	2,1,1,1
Lib10^3 3.3 ng	CGGGTTTAGAAC	CGCGTTTAGAAC,CGGATTTAGAAC,CGGGATTAGAAC,CGGGGTTAGAAC,CGGGTTTAGAAT,CGGGTTTAGGAC,CGGGTTTAGTAC	233	2,1,1,3,1,1,1
Lib10^3 3.3 ng	CGGTACCCTTCC	CGGAACCCTTCC,CGGCACCCTTCC,CGGGACCCTTCC,CGGTACCNTTCC	219	1,1,2,1
Lib10^3 3.3 ng	CGGTCGCGATCG	CGGACGCGATCG,CGGGCGCGATCG,CGGTCCCGATCG,CGGTCGCCATCG,CGGTCGCGACCG,CGGTCGCGGTCG,CGGTCGCGTTCG,CGGTCGCTATCG,CGGTGGCGATCG	209	2,1,2,1,1,1,1,1,1
Lib10^3 3.3 ng	CGGTCGCGCGGC	CGGACGCGCGGC,CGGTCGCGCGCC	186	1,1
Lib10^3 3.3 ng	CGGTCGGTCGGT	CGGTCGGTCCGT,CGGTCGGTCGGC,CGGTCGGTCGGG,CGGTCGGTGGGT,CNGTCGGTCGGT	232	1,1,1,1,1
Lib10^3 3.3 ng	CGGTCTTCTTAA	CGGACTTCTTAA,CGGGCTTCTTAA,CGGTCNTCTTAA,CGGTCTTCTGAA,CGGTCTTCTTAC,CGGTCTTCTTAT,CGGTCTTCTTTA,CGGTGTTCTTAA	303	3,3,1,1,1,1,1,1
Lib10^3 3.3 ng	CGGTGGATTATC	CGGAGGATTATC,CGGGGGATTATC,CGGTGGATTGTC,CGGTGGGTTATC	155	3,2,1,2
Lib10^3 3.3 ng	CGGTGGCACTGT	CGGAGGCACTGT,CGGGGGCACTGT,CGGTGGCACTCT,CGGTGGCATTGT,CGGTGGCGCTGT,CGGTGGCTCTGT,CTGTGGCACTGT	275	2,2,1,1,1,1,2
Lib10^3 3.3 ng	CGGTTCGCCTTC	CGGATCGCCTTC,CGGGTCGCCTTC,CGGTACGCCTTC,CGGTCCGCCTTC,CGGTTCGCNTTC	116	1,3,1,1,1
Lib10^3 3.3 ng	CGGTTTCCACGT	CAGTTTCCACGT,CGGATTCCACGT,CGGGTTCCACGT,CGGTTGCCACGT,CGGTTTCCACGG,GGGTTTCCACGT	232	1,3,2,1,1,1
Lib10^3 3.3 ng	CGTAATAAATTG	CATAATAAATTG,CGTAATAAATTT,CGTAATTAATTG,CGTACTAAATTG	242	1,1,1,1
Lib10^3 3.3 ng	CGTACGAATGCC	CGTACGTATGCC	92	1
Lib10^3 3.3 ng	CGTATACCCCCT	CGTATACACCCT,CGTATACCCGCT	31	1,1
Lib10^3 3.3 ng	CGTATTAATTTG	CGAATTAATTTG,CGTATTAATTTA,CGTATTAATTTC,CGTTTTAATTTG	260	1,1,1,1
Lib10^3 3.3 ng	CGTATTACCTGA	CGTATTACCTGT	148	3
Lib10^3 3.3 ng	CGTCCGCTGACT	CGTCCGCTGGCT,CGTCCGCTGTCT,TGTCCGCTGACT	162	3,2,1
Lib10^3 3.3 ng	CGTCGAGGTTCC	CCTCGAGGTTCC,CGACGAGGTTCC,CGGCGAGGTTCC,CGTCAAGGTTCC,CGTCGAGCTTCC,CGTCGAGGTTCA,CGTCGTGGTTCC,CGTTGAGGTTCC	229	1,1,1,1,1,1,4,1
Lib10^3 3.3 ng	CGTCTGGGCCGG	CCTCTGGGCCGG,CGACTGGGCCGG,CGTCTGGGCAGG,CGTCTGGGCCAG,CGTGTGGGCCGG,CNTCTGGGCCGG	259	1,1,1,1,1,1
Lib10^3 3.3 ng	CGTCTGTGAAGC	CCTCTGTGAAGC,CGACTGTGAAGC,CGTCTCTGAAGC,CGTCTGAGAAGC,CGTCTGGGAAGC,CGTCTGTGACGC,CGTCTGTGCAGC,CGTCTGTGGAGC,CGTCTGTGTAGC,CGTCTGTNAAGC,CGTTTGTGAAGC	241	1,1,1,1,2,1,2,4,2,1,1
Lib10^3 3.3 ng	CGTGACCTTTGG	CGAGACCTTTGG,CGTGACCTGTGG,CGTGGCCTTTGG,CGTGTCCTTTGG,CGTNACCTTTGG	216	1,1,2,4,1
Lib10^3 3.3 ng	CGTGTACGCCGG	CGTGGACGCCGG,CGTGTACGCCAG,CGTGTATGCCGG,CGTGTGCGCCGG,CGTGTTCGCCGG	269	1,1,1,2,1
Lib10^3 3.3 ng	CGTGTGCGGTCC	CGTGAGCGGTCC,CGTGTGCTGTCC	133	1,1
Lib10^3 3.3 ng	CGTTACTGTATC	CCTTACTGTATC,CGGTACTGTATC,CGTAACTGTATC,CGTCACTGTATC,CGTGACTGTATC,CGTTACTGAATC,CGTTANTGTATC,CGTTTCTGTATC	240	1,1,2,1,2,1,1,1
Lib10^3 3.3 ng	CGTTAGTATGTG	CCTTAGTATGTG,CGCTAGTATGTG,CGTAAGTATGTG,CGTCAGTATGTG,CGTGAGTATGTG,CGTNAGTATGTG,CGTTAGTATGGG,CGTTAGTGTGTG,CGTTGGTATGTG	266	1,1,1,1,1,1,1,1,1
Lib10^3 3.3 ng	CGTTATTCTACC	CGGTATTCTACC,CGTAATTCTACC,CGTCATTCTACC,CGTGATTCTACC,CGTTATNCTACC,CGTTATTNTACC,CGTTTTTCTACC	213	1,2,3,3,1,1,1
Lib10^3 3.3 ng	CGTTCGTTAATT	CCTTCGTTAATT,CGTACGTTAATT,CGTGCGTTAATT,CGTTCGTTAAAT,CGTTCGTTTATT,CTTTCGTTAATT	187	1,3,3,1,2,1
Lib10^3 3.3 ng	CGTTGATCTTGT	CGCTGATCTTGT,CGGTGATCTTGT,CGTAGATCTTGT,CGTGGATCTTGT,CGTTGAGCTTGT,CGTTGANCTTGT,CGTTGATCTTGG,CGTTGCTCTTGT,CGTTGGTCTTGT,CGTTGTTCTTGT	269	1,1,1,1,1,1,1,2,5,5
Lib10^3 3.3 ng	CGTTGCTCCGTC	CATTGCTCCGTC,CGCTGCTCCGTC,CGTAGCTCCGTC,CGTCGCTCCGTC,CGTGGCTCCGTC,CGTTGCNCCGTC,CGTTGCTCCGCC,CGTTGCTCCGGC,CGTTGCTCTGTC,TGTTGCTCCGTC	307	2,1,1,1,2,1,1,1,1,1
Lib10^3 3.3 ng	CGTTTCATGGGG	CGATTCATGGGG,CGTATCATGGGG,CGTGTCATGGGG,CGTTTCATGCGG,CGTTTCATGGTG,TGTTTCATGGGG	165	1,5,3,1,1,1
Lib10^3 3.3 ng	CGTTTGTCCCCT	CCTTTGTCCCCT,CGCTTGTCCCCT,CGTATGTCCCCT,CGTCTGTCCCCT,CGTGTGTCCCCT,CGTTTGCCCCCT,CGTTTGTCCTCT	226	1,2,3,2,3,1,1
Lib10^3 3.3 ng	CGTTTTAGTGTC	CGATTTAGTGTC,CGTATTAGTGTC,CGTCTTAGTGTC,CGTGTTAGTGTC,GGTTTTAGTGTC	74	1,2,2,3,1
Lib10^3 3.3 ng	CGTTTTGTGGTG	CATTTTGTGGTG,CCTTTTGTGGTG,CGGTTTGTGGTG,CGTATTGTGGTG,CGTGTTGTGGTG,CGTTCTGTGGTG,CGTTTGGTGGTG,CGTTTTGTGGGG	261	1,1,1,3,3,1,1,1
Lib10^3 3.3 ng	CTAAAAACGATC	CTAATAACGATC	36	1
Lib10^3 3.3 ng	CTAACGGCATGT	CGAACGGCATGT,CTAACGGCATGA,CTAACGGCATGC,CTAACGGCATGG,CTAACGGTATGT,CTAAGGGCATGT,CTATCGGCATGT,GTAACGGCATGT	311	1,1,2,1,1,1,2,1
Lib10^3 3.3 ng	CTACCTGGAGTC	CTACCTGAAGTC,CTACCTGGAGGC,CTACCTGGGGTC,CTACCTGGTGTC,CTAGCTGGAGTC,CTANCTGGAGTC	224	1,1,4,1,1,1
Lib10^3 3.3 ng	CTACTCTCGAGC	CTACTCTCGTGC	35	3
Lib10^3 3.3 ng	CTAGGGGTTGGG	CTAGGGATTGGG,CTAGGGGATGGG,CTAGGGGGTGGG,CTAGGGGTTAGG,CTAGGGGTTGGA,CTANGGGTTGGG,TTAGGGGTTGGG	234	1,3,1,1,1,1,1
Lib10^3 3.3 ng	CTAGTAGACTTG	CTAGTAGACCTG,CTAGTAGTCTTG	236	1,1
Lib10^3 3.3 ng	CTAGTGCGTGTG	CTAGCGCGTGTG,CTAGTCCGTGTG,CTAGTGCCTGTG,CTAGTGCGAGTG,CTAGTGCGCGTG,CTAGTGCGTGAG,CTAGTGCGTGGG,CTANTGCGTGTG,CTTGTGCGTGTG	311	1,1,1,1,1,1,3,1,2
Lib10^3 3.3 ng	CTATCACCCTTT	CTANCACCCTTT,CTATCACCCTGT,CTATCACNCTTT,CTGTCACCCTTT	148	1,1,1,1
Lib10^3 3.3 ng	CTATCGAGGTAT	CTAACGAGGTAT,CTATCGTGGTAT,CTATGGAGGTAT	82	2,1,1
Lib10^3 3.3 ng	CTATGCGTGTTT	CTATGCGTGGTT,CTATGCGTGTAT,CTATGNGTGTTT	139	1,1,1
Lib10^3 3.3 ng	CTATGTACCATA	CTATGTCCCATA	158	1
Lib10^3 3.3 ng	CTATGTGCGCTT	CTATGGGCGCTT,CTATGTGCGTTT	137	1,1
Lib10^3 3.3 ng	CTATTTGGTCTC	CTANTTGGTCTC,CTATTAGGTCTC,CTATTNGGTCTC,CTATTTGGACTC,CTATTTGGTCCC,CTATTTGGTCTT,CTGTTTGGTCTC	171	1,1,1,1,1,1,2
Lib10^3 3.3 ng	CTCAGAGGTTGA	CTCAGAAGTTGA,CTCAGAGGTGGA,CTCAGAGGTTGG,CTCAGTGGTTGA,CTCCGAGGTTGA,CTCTGAGGTTGA	214	1,1,1,1,1,1
Lib10^3 3.3 ng	CTCATCCCTGTG	CTCAGCCCTGTG,CTCATCCCTGAG,CTCATGCCTGTG,CTCATTCCTGTG	277	1,2,1,1
Lib10^3 3.3 ng	CTCATTGCCTGC	CCCATTGCCTGC,CTCATGGCCTGC,CTCATTGCCTCC,CTCGTTGCCTGC,CTCTTTGCCTGC,GTCATTGCCTGC	306	1,1,1,1,1,1
Lib10^3 3.3 ng	CTCATTTTATGT		24
Lib10^3 3.3 ng	CTCCCAGTGACC	CGCCCAGTGACC,CTCCCAGAGACC,CTCCCAGTGGCC,CTCCTAGTGACC	168	1,1,2,1
Lib10^3 3.3 ng	CTCCGAACCAAA	CTCCGAANCAAA,CTCCGATCCAAA,CTCCGGACCAAA,CTCCGNACCAAA,CTCCGTACCAAA	178	1,1,3,1,3
Lib10^3 3.3 ng	CTCCGGTGGATT	CTCCGGAGGATT,TTCCGGTGGATT	48	1,1
Lib10^3 3.3 ng	CTCCTTGATAAC	CTCCTTGGTAAC,CTCCTTGNTAAC,CTCCTTGTTAAC,CTCCTTNATAAC	254	1,1,3,1
Lib10^3 3.3 ng	CTCGGGGCATCG	CTCCGGGCATCG,CTCGCGGCATCG	192	1,2
Lib10^3 3.3 ng	CTCGTGGCCAAT	CTCATGGCCAAT,CTCGAGGCCAAT,CTCGGGGCCAAT,CTCGTAGCCAAT,CTCGTGGCCAAG,CTCGTGGCCAGT,CTCGTGGGCAAT,CTCGTTGCCAAT,CTCTTGGCCAAT,CTTGTGGCCAAT,TTCGTGGCCAAT	386	1,1,2,1,1,1,1,1,1,1,2
Lib10^3 3.3 ng	CTCGTGTGTTCT	CACGTGTGTTCT,CTCGGGTGTTCT,CTCGTGAGTTCT,CTCGTGGGTTCT,CTCGTGTGGTCT,CTCGTGTGTCCT,CTCGTGTGTTCC,CTCGTGTTTTCT,CTGGTGTGTTCT	325	1,1,1,1,3,1,1,1,1
Lib10^3 3.3 ng	CTCTACGCGTCT	CTCTACGCCTCT	21	1
Lib10^3 3.3 ng	CTCTATGATCAA	CTCTATGATCAG,CTCTATGGTCAA	225	1,1
Lib10^3 3.3 ng	CTCTCGAATCGG	CACTCGAATCGG,CTCTCGACTCGG,CTCTCGANTCGG,CTCTCGGATCGG,CTCTCNAATCGG,CTCTCTAATCGG,GTCTCGAATCGG	212	1,1,1,1,1,1,1
Lib10^3 3.3 ng	CTCTGGCCATCT	CGCTGGCCATCT,CTCGGGCCATCT,CTCTGTCCATCT	216	1,1,1
Lib10^3 3.3 ng	CTGATTGTGGCC		40
Lib10^3 3.3 ng	CTGCAGATTGGT	CTGCACATTGGT,CTGCAGATGGGT,CTGCAGATTGGC,CTGCATATTGGT	233	1,1,1,1
Lib10^3 3.3 ng	CTGCCTCAATCT	CTGCCTCAATCA,CTGCCTCAATTT,CTGCCTCCATCT,CTGCCTCGATCT,CTGGCTCAATCT	293	1,1,1,1,1
Lib10^3 3.3 ng	CTGCCTGGACTC	CTGCCNGGACTC,CTGCCTGGTCTC	104	1,1
Lib10^3 3.3 ng	CTGCGACGATAG	CAGCGACGATAG,CTGCGACGATTG,CTGCGACGGTAG,CTGCGACGTTAG,CTGCGGCGATAG,CTGCGTCGATAG	242	1,2,1,1,1,2
Lib10^3 3.3 ng	CTGCGGCTTGGT	CTGCGGCTAGGT,CTGCGGTTTGGT,CTGCGTCTTGGT,CTGCTGCTTGGT	214	1,1,1,1
Lib10^3 3.3 ng	CTGCGGTCTTTT		69
Lib10^3 3.3 ng	CTGCTCTGGCCT	CTGCTCGGGCCT,CTGCTCTGACCT,CTGCTCTGGCTT	208	1,1,2
Lib10^3 3.3 ng	CTGCTTATGGGC	CTGCTAATGGGC,CTGCTTATGAGC,CTGCTTATGGCC,CTGCTTATGTGC	334	1,1,1,1
Lib10^3 3.3 ng	CTGCTTGTGGAG	CTGCTTGTGGCG,CTGCTTGTGGGG,CTGCTTGTGGTG,CTGCTTGTGTAG,CTGTTTGTGGAG	203	3,10,8,1,1
Lib10^3 3.3 ng	CTGGAGTGTCGG	CTGAAGTGTCGG,CTGGAGAGTCGG,CTGGAGTATCGG,CTGGAGTGTCCG,CTGGGGTGTCGG,CTGGTGTGTCGG	133	1,2,1,1,1,2
Lib10^3 3.3 ng	CTGGGGGTCGCT	CTGGGGGGCGCT,CTGGGGGTCGGT,CTGGGTGTCGCT,CTGGTGGTCGCT	162	2,1,1,1
Lib10^3 3.3 ng	CTGGGTTTGTAA	CTGGGTTCGTAA,CTGTGTTTGTAA,CTTGGTTTGTAA	193	1,1,1
Lib10^3 3.3 ng	CTGGTATCATTG		45
Lib10^3 3.3 ng	CTGGTTGTGCTG	CTGGTTGTGCAG	57	1
Lib10^3 3.3 ng	CTGTAACGTGAG	CTGGAACGTGAG,CTGTAACGTGAT,CTGTAACGTGGG,CTGTAACGTGTG,CTGTAGCGTGAG,CTTTAACGTGAG	278	1,1,12,15,1,1
Lib10^3 3.3 ng	CTGTAGGCGTCG	CTGAAGGCGTCG,CTGTAGGCCTCG,CTGTAGGCGACG,CTGTAGGCGGCG,CTGTAGGCGTAG,CTGTAGGCGTGG,CTGTAGGGGTCG,CTGTGGGCGTCG	240	1,1,1,2,2,4,1,1
Lib10^3 3.3 ng	CTGTATGCACAC	CTGNATGCACAC,CTGTATGCAGAC	209	1,1
Lib10^3 3.3 ng	CTGTGATGACCG	CTGAGATGACCG	49	1
Lib10^3 3.3 ng	CTGTGGACTTCG	CTGGGGACTTCG,CTGTGGTCTTCG	192	1,2
Lib10^3 3.3 ng	CTGTGTGCGGCT	CTGGGTGCGGCT,CTGTGGGCGGCT,CTGTGTGCCGCT,CTGTGTGCGCCT,CTGTGTGCTGCT	290	1,1,2,1,1
Lib10^3 3.3 ng	CTGTGTTAGTGT	CTGCGTTAGTGT,CTGGGTTAGTGT,CTGTGATAGTGT,CTGTGGTAGTGT,CTGTGTTAGAGT,CTGTGTTAGTGA,CTGTGTTGGTGT	266	1,1,1,1,1,1,1
Lib10^3 3.3 ng	CTGTTATGATGG	CTCTTATGATGG,CTGATATGATGG,CTGGTATGATGG,CTGTTATGATGA,CTGTTATGATGC,CTGTTATGCTGG,CTGTTATGGTGG,CTGTTATGTTGG	184	1,1,1,1,1,1,1,2
Lib10^3 3.3 ng	CTGTTCCGTTCA	CTGGTCCGTTCA,CTGTTACGTTCA,CTGTTCCATTCA	137	2,1,1
Lib10^3 3.3 ng	CTGTTGAGACTG	CTGATGAGACTG,CTGGTGAGACTG,CTGTAGAGACTG,CTGTGGAGACTG,CTGTTGAGTCTG,CTGTTGATACTG,CTGTTGCGACTG,CTGTTGGGACTG,CTGTTGTGACTG	293	2,3,1,1,2,1,1,1,5
Lib10^3 3.3 ng	CTGTTGAGTGAA	CTGATGAGTGAA,CTGGTGAGTGAA,CTGTTGAGTGAT,CTGTTGAGTGGA,CTGTTGAGTGTA,CTGTTGANTGAA,CTGTTGGGTGAA,CTGTTGNGTGAA,CTGTTGTGTGAA	320	2,2,1,1,2,2,4,1,5
Lib10^3 3.3 ng	CTGTTGGATTTT	CTGGTGGATTTT,CTGTTGGATTAT	45	1,1
Lib10^3 3.3 ng	CTTACAATTTTT	CTTACAATTATT,CTTACAATTTTC,CTTACATTTTTT,CTTACCATTTTT,GTTACAATTTTT	243	1,1,2,1,1
Lib10^3 3.3 ng	CTTACAGATAGT	CTCACAGATAGT,CTTACACATAGT,CTTACAGATAGA,CTTACAGATAGG,CTTACAGATTGT,CTTACAGCTAGT,CTTACAGGTAGT,CTTACAGTTAGT,CTTACTGATAGT	264	1,1,1,1,1,1,1,1,1
Lib10^3 3.3 ng	CTTACGCAGAGA	CTTACGCAGAGT,CTTACGCAGCGA,CTTACGCAGGGA,CTTACGCAGTGA,CTTACNCAGAGA,CTTACTCAGAGA,CTTGCGCAGAGA,CTTTCGCAGAGA	227	1,1,2,1,1,1,1,1
Lib10^3 3.3 ng	CTTAGATTCCGT	CTCAGATTCCGT,CTTAAATTCCGT,CTTAGACTCCGT,CTTAGCTTCCGT,CTTAGGTTCCGT,CTTAGTTTCCGT	211	1,1,1,1,3,3
Lib10^3 3.3 ng	CTTAGCTCTGGA	CTTAGCACTGGA,CTTAGCCCTGGA,CTTAGCTCTGCA,CTTAGCTCTGTA	153	1,1,1,1
Lib10^3 3.3 ng	CTTAGTCCGTTG	CATAGTCCGTTG,CTAAGTCCGTTG,CTTAGACCGTTG,CTTAGTCCCTTG,CTTAGTCCGATG,CTTAGTCCGGTG	273	1,1,1,1,1,3
Lib10^3 3.3 ng	CTTATAATGCTG	CTAATAATGCTG,CTGATAATGCTG,CTTATAATGCGG,CTTATACTGCTG	238	1,1,1,1
Lib10^3 3.3 ng	CTTATTCCTCTA	CGTATTCCTCTA,CTTATTTCTCTA,CTTGTTCCTCTA,GTTATTCCTCTA,TTTATTCCTCTA	265	1,2,1,1,1
Lib10^3 3.3 ng	CTTGAAAGACGT	CTTGAAAGACGA,CTTGAAAGACGG,CTTGAAAGGCGT,CTTGAAAGTCGT,CTTGAANGACGT,CTTGACAGACGT,CTTGGAAGACGT,CTTGTAAGACGT	272	1,2,3,2,1,1,1,3
Lib10^3 3.3 ng	CTTGAAGACGGA	CTTGAAGAAGGA,CTTGAAGACGGT,CTTGAAGCCGGA,CTTGAAGTCGGA,CTTGGAGACGGA	230	1,1,1,1,2
Lib10^3 3.3 ng	CTTGACGTTTCC	CTTGACATTTCC,CTTGACGCTTCC,CTTGACGTTCCC,CTTGACGTTGCC,CTTGACGTTTGC,CTTGANGTTTCC,CTTGCCGTTTCC,CTTGTCGTTTCC	256	1,1,1,1,1,1,1,3
Lib10^3 3.3 ng	CTTGGGTTAGCT		199
Lib10^3 3.3 ng	CTTGGTCTCGTC		204
Lib10^3 3.3 ng	CTTGGTTAAACG	ATTGGTTAAACG,CTTGGATAAACG,CTTGGCTAAACG,CTTGGTTAATCG,CTTGGTTAGACG,GTTGGTTAAACG	166	1,1,1,1,1,1
Lib10^3 3.3 ng	CTTGTGCATCCG	CCTGTGCATCCG,CTTGAGCATCCG,CTTGTACATCCG,CTTGTGCTTCCG	170	1,1,1,2
Lib10^3 3.3 ng	CTTTACGGTGTT	CTTTACGGTATT,CTTTACGGTGAT,CTTTACGGTGTA,CTTTAGGGTGTT,CTTTANGGTGTT	296	2,1,1,3,2
Lib10^3 3.3 ng	CTTTATTATTTG	CTCTATTATTTG,CTTTATTATATG	188	1,1
Lib10^3 3.3 ng	CTTTATTGAAAG	CTTTATGGAAAG,CTTTATTGAAAC,CTTTATTGAATG,CTTTATTGGAAG,CTTTATTGTAAG	151	1,1,1,1,1
Lib10^3 3.3 ng	CTTTCGAACTGC	CTCTCGAACTGC,CTTACGAACTGC,CTTTCGATCTGC,CTTTCGCACTGC,CTTTCGGACTGC,CTTTCGTACTGC	182	1,1,1,1,4,2
Lib10^3 3.3 ng	CTTTCGGTCTTT	CTTTCAGTCTTT,CTTTCGGTCTCT,CTTTCGGTCTGT,CTTTCGGTCTTG,CTTTCGGTGTTT,CTTTCTGTCTTT	168	1,1,1,1,1,1
Lib10^3 3.3 ng	CTTTCGTTACGA	CTGTCGTTACGA,CTTTCATTACGA,CTTTCGTTACCA,CTTTCGTTACGG,CTTTCGTTATGA,GTTTCGTTACGA	134	1,1,1,4,1,1
Lib10^3 3.3 ng	CTTTGAAGCCTT	CTTAGAAGCCTT,CTTGGAAGCCTT,CTTTGAAGCCTA,CTTTGAAGGCTT,CTTTGGAGCCTT,CTTTGNAGCCTT,CTTTGTAGCCTT	209	1,1,1,1,5,1,7
Lib10^3 3.3 ng	CTTTGAGATGTC	ATTTGAGATGTC,CTTTCAGATGTC,CTTTGAGATGAC,CTTTGAGATGGC,CTTTGAGCTGTC,CTTTGAGTTGTC,CTTTGGGATGTC,CTTTGTGATGTC	299	1,1,1,1,1,3,2,3
Lib10^3 3.3 ng	CTTTTATTACTA	CATTTATTACTA,CTTATATTACTA,CTTTTATNACTA,GTTTTATTACTA,TTTTTATTACTA	236	1,1,1,1,2
Lib10^3 3.3 ng	CTTTTCACTTCC	CATTTCACTTCC,CTATTCACTTCC,CTTTTCATTTCC,CTTTTCTCTTCC	131	1,1,1,1
Lib10^3 3.3 ng	CTTTTCTCTGCG	CTTCTCTCTGCG,CTTTTCTCAGCG,CTTTTCTCTACG,CTTTTCTCTGCT,GTTTTCTCTGCG	202	1,1,1,1,1
Lib10^3 3.3 ng	CTTTTGAGTTAT	CTTCTGAGTTAT,CTTTTCAGTTAT,CTTTTGAATTAT,CTTTTGAGCTAT,CTTTTGAGTAAT,CTTTTGAGTCAT,CTTTTGGGTTAT,CTTTTGTGTTAT,GTTTTGAGTTAT	269	2,1,1,1,1,1,2,2,1
Lib10^3 3.3 ng	CTTTTTGATTTC	CTTATTGATTTC,CTTTGTGATTTC,CTTTTCGATTTC,CTTTTTGATATC,CTTTTTGATCTC,CTTTTTGATTAC,CTTTTTGTTTTC	170	1,1,1,1,1,1,2
Lib10^3 3.3 ng	GAAAGCCAGCTA	CAAAGCCAGCTA,GAAAGCCAGGTA,GACAGCCAGCTA,GAGAGCCAGCTA,GCAAGCCAGCTA,GGAAGCCAGCTA,GTAAGCCAGCTA	243	1,1,3,1,1,1,1
Lib10^3 3.3 ng	GAAATTTAACAC	GAAATTTAACTC,GAAGTTTAACAC	209	1,1
Lib10^3 3.3 ng	GAACAAAGCAGG	GAACAAAGCGGG,GTACAAAGCAGG	64	1,1
Lib10^3 3.3 ng	GAACGGACTCGC	GAACGGTCTCGC,GGACGGACTCGC,GTACGGACTCGC,TAACGGACTCGC	119	4,1,1,1
Lib10^3 3.3 ng	GAACTCCCACTA	GAACGCCCACTA,GAACTCCCATTA,GGACTCCCACTA,GTACTCCCACTA	227	1,1,2,2
Lib10^3 3.3 ng	GAAGCCCACTAA	GATGCCCACTAA,GGAGCCCACTAA,GTAGCCCACTAA	230	1,5,3
Lib10^3 3.3 ng	GAAGGGCTCCCC	GAAGGGCTCCTC,GACGGGCTCCCC,GGAGGGCTCCCC	209	1,1,2
Lib10^3 3.3 ng	GAAGGTCGGGTC	GAAGGGCGGGTC,GAAGGTCGGATC,GCAGGTCGGGTC,GTAGGTCGGGTC	159	1,1,1,1
Lib10^3 3.3 ng	GAAGTCTGACGT	GAAGTATGACGT,GAAGTCTCACGT,GAAGTCTGACGG,GAAGTCTGCCGT,GAAGTCTGGCGT,GAAGTCTGTCGT,GCAGTCTGACGT,GGAGTCTGACGT,GTAGTCTGACGT	298	1,1,1,1,5,5,1,3,1
Lib10^3 3.3 ng	GAAGTTTGTGTC	GAAGATTGTGTC,GAAGTTTGGGTC,GAAGTTTGTGAC,GAAGTTTGTGTT,GATGTTTGTGTC,GCAGTTTGTGTC,GTAGTTTGTGTC	357	3,1,1,1,1,1,2
Lib10^3 3.3 ng	GAATCAGAGCAA	GAACCAGAGCAA,GAATCAGAGCAG,GAATCAGAGGAA,GAATCAGAGTAA,GAATCAGGGCAA,GAATCAGTGCAA	263	2,1,1,1,1,2
Lib10^3 3.3 ng	GAATGTATTCTT	GAAAGTATTCTT,GAATGAATTCTT,GAATGGATTCTT,GAATGTATCCTT	151	1,1,1,1
Lib10^3 3.3 ng	GAATTGTGTTCG	CAATTGTGTTCG,GAAATGTGTTCG,GAANTGTGTTCG,GAATTGAGTTCG,GAATTGGGTTCG,GAATTGTGTTCA,GAATTGTGTTCC,GTATTGTGTTCG	291	2,1,1,2,1,1,1,1
Lib10^3 3.3 ng	GAATTTCAAGCA	GAATATCAAGCA,GAATTACAAGCA,GAATTTCAACCA,GAATTTCACGCA,GAATTTCAGGCA,GCATTTCAAGCA,GGATTTCAAGCA,GTATTTCAAGCA	371	1,1,1,1,2,1,2,2
Lib10^3 3.3 ng	GACCCCCTTTCT	GACCCACTTTCT,GACCCGCTTTCT,GACCCTCTTTCT,GGCCCCCTTTCT,GTCCCCCTTTCT	261	1,1,1,1,9
Lib10^3 3.3 ng	GACCTTTGTTAA	GGCCTTTGTTAA,GTCCTTTGTTAA	277	1,2
Lib10^3 3.3 ng	GACGATTCTGTA	GACGATCCTGTA,GACGATTCTGTG,GACNATTCTGTA,GGCGATTCTGTA	166	1,1,1,1
Lib10^3 3.3 ng	GACGGACGCTTC	GACGGACGCCTC,GACGGACGCTGC,GACGGACGTTTC,GCCGGACGCTTC,GTCGGACGCTTC	128	1,1,1,2,1
Lib10^3 3.3 ng	GACGTAGTGTTT	GACGTAGAGTTT,GACGTAGTGATT,GATGTAGTGTTT	150	1,1,1
Lib10^3 3.3 ng	GACGTCCTGCCT	GACGACCTGCCT,GACGTACTGCCT,GACGTCCTGACT,GACGTNCTGCCT,GGCGTCCTGCCT,GTCGTCCTGCCT	148	1,1,1,1,1,2
Lib10^3 3.3 ng	GACTACGAGATT	CACTACGAGATT,GACTACGTGATT,GACTANGAGATT,GACTATGAGATT,GACTCCGAGATT,GCCTACGAGATT,GTCTACGAGATT	168	1,1,1,1,1,1,2
Lib10^3 3.3 ng	GACTCACGCTTA	GACTCACGCATA,GACTCACGCTAA,GACTCACGGTTA,GACTCANGCTTA,GACTCCCGCTTA,GACTCGCGCTTA,GGCTCACGCTTA,GTCTCACGCTTA	304	3,1,1,1,1,1,1,5
Lib10^3 3.3 ng	GACTTTCTACTG	GACTTCCTACTG,GACTTTCTTCTG	192	1,1
Lib10^3 3.3 ng	GAGACGTTAACG	GAGACCTTAACG,GAGACGGTAACG,GAGACGNTAACG,GAGACGTAAACG,GAGACGTGAACG,GAGTCGTTAACG,GGGACGTTAACG,GTGACGTTAACG,TAGACGTTAACG	319	1,1,1,1,1,2,4,7,1
Lib10^3 3.3 ng	GAGAGTCACCTG	GACAGTCACCTG,GAGAGACACCTG,GAGAGTCACCTC,GAGAGTCTCCTG,GAGAGTTACCTG,GAGCGTCACCTG,GAGTGTCACCTG,GGGAGTCACCTG,GTGAGTCACCTG	254	2,1,1,1,1,1,2,3,1
Lib10^3 3.3 ng	GAGCATGCAGAT	GAGCATCCAGAT,GAGCATGCAGTT,GAGCATGGAGAT,GAGGATGCAGAT,GCGCATGCAGAT,GGGCATGCAGAT,GTGCATGCAGAT	209	1,2,1,1,1,4,2
Lib10^3 3.3 ng	GAGCCTGTAGGA	GAGCCTGAAGGA,GAGCCTGCAGGA,GAGCCTGGAGGA,GAGCCTGTAGGG,GAGCCTGTAGGT,GAGCCTGTGGGA,GAGNCTGTAGGA,GAGTCTGTAGGA,GGGCCTGTAGGA,GTGCCTGTAGGA	295	1,1,1,1,1,1,1,1,4,3
Lib10^3 3.3 ng	GAGCGTGCTTGG	GAGCTTGCTTGG,GCGCGTGCTTGG,GGGCGTGCTTGG,GTGCGTGCTTGG	231	1,1,4,3
Lib10^3 3.3 ng	GAGCTCTGTCCT	GAGCTCTGCCCT,GAGCTCTGTCGT,GAGCTGTGTCCT,GAGGTCTGTCCT,GAGTTCTGTCCT,GCGCTCTGTCCT,GGGCTCTGTCCT,GTGCTCTGTCCT	252	1,1,1,1,1,2,7,3
Lib10^3 3.3 ng	GAGGATTCGCCT	AAGGATTCGCCT,GAGAATTCGCCT,GAGGATCCGCCT,GAGGGTTCGCCT,GTGGATTCGCCT	214	1,1,1,1,3
Lib10^3 3.3 ng	GAGGATTTTTAG	GAGCATTTTTAG,GAGGANTTTTAG,GAGGATTTTAAG,GAGGATTTTGAG,GAGGATTTTTAC,GAGGATTTTTCG,GAGGTTTTTTAG,GGGGATTTTTAG,GTGGATTTTTAG	223	1,1,1,1,1,1,1,2,4
Lib10^3 3.3 ng	GAGGCTAGGTTG	CAGGCTAGGTTG,GAGGCTAGGCTG,GGGGCTAGGTTG,GTGGCTAGGTTG	147	1,1,4,3
Lib10^3 3.3 ng	GAGGGCTATGAC	GAAGGCTATGAC,GAGGCCTATGAC,GAGGGCTAGGAC,GAGGGCTATGAT,GAGGGCTATGCC,GAGGGCTATGGC,GAGGGCTATGTC,GAGGGGTATGAC,GAGNGCTATGAC,GGGGGCTATGAC,GTGGGCTATGAC	277	1,1,1,2,1,2,2,1,1,1,3
Lib10^3 3.3 ng	GAGGGGGTGGTT	CAGGGGGTGGTT,GAGGGAGTGGTT,GAGGGGCTGGTT,GAGGGGGTGGAT,GAGGGGGTGGGT,GAGGGGGTGGTA,GGGGGGGTGGTT	351	1,1,1,3,2,2,1
Lib10^3 3.3 ng	GAGGTTCAGGGG	GAGGGTCAGGGG,GAGGTTCAGGGC,GAGGTTCTGGGG,GTGGTTCAGGGG	131	1,1,1,2
Lib10^3 3.3 ng	GAGTGATGGATA	GAGAGATGGATA,GAGCGATGGATA,GAGGGATGGATA,GAGTGATCGATA,GAGTGATGGATT,GAGTGATGGGTA,GAGTGATGGTTA,GAGTGCTGGATA,GAGTGNTGGATA,GAGTGTTGGATA,GTGTGATGGATA,TAGTGATGGATA	247	1,1,1,1,1,3,1,1,1,1,2,1
Lib10^3 3.3 ng	GAGTTAGAGGTG	GAGGTAGAGGTG,GAGTGAGAGGTG,GAGTTAGAGGAG,GGGTTAGAGGTG	245	1,1,2,1
Lib10^3 3.3 ng	GAGTTAGCGTGG	GAGCTAGCGTGG,GAGGTAGCGTGG,GAGTAAGCGTGG,GGGTTAGCGTGG,GTGTTAGCGTGG	302	1,1,1,1,2
[truncated: 5,122 more rows]

## Sheet: 1D
Sample name	BC	BC(-)	BC#	BC(-)#
Lib10^4 1 ng	AAAAAGTGTTAA	AAANAGTGTTAA	71	1
Lib10^4 1 ng	AAAAAGTTCTGG	AAAAAGTACTGG,AAAAAGTTTTGG,AAAATGTTCTGG	134	1,1,1
Lib10^4 1 ng	AAAAATCTGAGG	AAAAANCTGAGG,AAAAATCTGGGG,AAAAATCTGTGG,AAAAGTCTGAGG	110	1,1,1,1
Lib10^4 1 ng	AAAACCATGTAA	AAAACCATGGAA,AATACCATGTAA	98	1,1
Lib10^4 1 ng	AAAACTTTAAAC	AAAAATTTAAAC,AAAACTTTAGAC	95	1,1
Lib10^4 1 ng	AAAAGAGCTCAT	AAAAAAGCTCAT,AAAAGATCTCAT,AAAAGCGCTCAT,AAAAGGGCTCAT,AAAAGTGCTCAT	100	1,1,1,2,1
Lib10^4 1 ng	AAAAGGGGATGA	AAAAGCGGATGA,AAAAGGGGATGT	162	1,1
Lib10^4 1 ng	AAAAGGGTGAAT	AAAAAGGTGAAT,AAAAGAGTGAAT,AAAAGGGTGGAT,AAAGGGGTGAAT,ATAAGGGTGAAT	98	1,1,1,1,1
Lib10^4 1 ng	AAAAGGTGGTAT	AAAAGATGGTAT,AAAAGGTGGTGT,AAAANGTGGTAT,AAGAGGTGGTAT	180	1,1,1,1
Lib10^4 1 ng	AAAAGTGATGAC	AAAAGTGATCAC	92	1
Lib10^4 1 ng	AAAAGTGGTGTC	AAAAGAGGTGTC,AAAAGGGGTGTC,AAAAGTGGGGTC,AAATGTGGTGTC	188	2,1,1,1
Lib10^4 1 ng	AAAAGTGTTGTA	AAAAGGGTTGTA,AAAAGTGTAGTA,AAAAGTGTTCTA	203	1,1,2
Lib10^4 1 ng	AAAAGTTATTCT		47
Lib10^4 1 ng	AAAAGTTGTGTT	AAAAGGTGTGTT,AAAAGTTGGGTT,AAAAGTTGTGCT,AAANGTTGTGTT	212	1,1,1,1
Lib10^4 1 ng	AAAATAATTGCC		157
Lib10^4 1 ng	AAAATTGGGCCA	AAAATAGGGCCA,AAAATCGGGCCA,AAAATTGGGCGA,AAAATTGTGCCA,AAAATTNGGCCA,AAGATTGGGCCA	152	1,1,1,1,1,1
Lib10^4 1 ng	AAACAATACGAC	AAACAATACGAA	92	1
Lib10^4 1 ng	AAACAGGTATTC		45
Lib10^4 1 ng	AAACCATGAATG	AAACCATGAGTG,AAACCATGTATG,AAAGCATGAATG	100	2,1,1
Lib10^4 1 ng	AAACCCCTGGCT	AAACACCTGGCT,AGACCCCTGGCT	135	1,1
Lib10^4 1 ng	AAACCGAGCGTA	AAACCCAGCGTA,AAACCGGGCGTA,AAACCGNGCGTA,AACCCGAGCGTA,ATACCGAGCGTA	142	1,2,1,1,1
Lib10^4 1 ng	AAACGATCCGGT	AAACCATCCGGT,AAACGATCCGGG,AAACGCTCCGGT,AAACGGTCCGGT,AAACGTTCCGGT,ATACGATCCGGT	314	1,1,1,5,3,2
Lib10^4 1 ng	AAACGGTAGCTA	AAACGATAGCTA,AAACGGTAGCAA,AAGCGGTAGCTA	129	1,1,1
Lib10^4 1 ng	AAACGTGCAGCG	AAACGTGCTGCG,AAGCGTGCAGCG	134	1,1
Lib10^4 1 ng	AAACGTGTTTGG	AAACGTGGTTGG,AAACGTGTCTGG,AAACGTNTTTGG,AGACGTGTTTGG,ATACGTGTTTGG	167	1,1,1,1,1
Lib10^4 1 ng	AAACGTTCTCGT	AAACCTTCTCGT,AAACGTCCTCGT,AATCGTTCTCGT	103	2,1,1
Lib10^4 1 ng	AAACGTTCTGAG	AAACGTTCTGCG,AAACGTTCTGGG,AAACGTTCTGTG,GAACGTTCTGAG	98	2,2,7,1
Lib10^4 1 ng	AAACTAAAAGTT	AAACTAAAAGCT	58	1
Lib10^4 1 ng	AAACTACGGACG	AAACTACGAACG,AAACTACGGGCG,AAACTACGGTCG,AATCTACGGACG,ACACTACGGACG	150	2,2,3,1,1
Lib10^4 1 ng	AAACTAGTTAGT	AAACTAATTAGT,AAACTAGTGAGT,AAACTNGTTAGT	272	1,1,1
Lib10^4 1 ng	AAACTGACCTGT	AAACTGACCTGA,AAACTGACCTGG,AAACTGANCTGT,AAACTGATCTGT,AAACTGTCCTGT,AAATTGACCTGT	108	1,1,1,1,5,1
Lib10^4 1 ng	AAACTGGTAGGT	AAACTGATAGGT,AAACTGNTAGGT,AAACTGTTAGGT	95	1,1,1
Lib10^4 1 ng	AAACTTTATAGG	AAACTATATAGG,AAACTTTATAGA,AAACTTTATAGC,AAAGTTTATAGG,AGACTTTATAGG,GAACTTTATAGG	131	1,1,1,1,1,1
Lib10^4 1 ng	AAACTTTCGGGT	AAACTTNCGGGT,AAACTTTCGGCT,GAACTTTCGGGT	99	1,1,1
Lib10^4 1 ng	AAAGAGTCTATA	AAAGAGTCTATT,AAAGCGTCTATA,AAAGTGTCTATA	163	1,1,1
Lib10^4 1 ng	AAAGATCTTTGG	AAAGATCATTGG,AAAGGTCTTTGG	68	1,1
Lib10^4 1 ng	AAAGATTGTTGT		124
Lib10^4 1 ng	AAAGATTTGCCC	AAAGATCTGCCC	69	1
Lib10^4 1 ng	AAAGATTTGTCT	AAAGTTTTGTCT,TAAGATTTGTCT	55	1,1
Lib10^4 1 ng	AAAGCACTGTTT	AAAGCACTGATT	122	1
Lib10^4 1 ng	AAAGCGCGTACA	AAAGCACGTACA	93	1
Lib10^4 1 ng	AAAGCTCGATAT		63
Lib10^4 1 ng	AAAGCTTCACCT	AAAGCTTCGCCT	152	1
Lib10^4 1 ng	AAAGCTTTTTCT	AGAGCTTTTTCT	70	1
Lib10^4 1 ng	AAAGGACGAGCC	AAAGGACGTGCC	148	2
Lib10^4 1 ng	AAAGGCCTGTCA	AAAAGCCTGTCA,AAAGGCCTGGCA,AAAGTCCTGTCA,AGAGGCCTGTCA	192	1,1,148,1
Lib10^4 1 ng	AAAGGCGGGGGA	AAAGGCGGGAGA,AAAGGCGGGGGG,AAAGGCGGGGGT,AAAGGCGNGGGA,AAAGGGGGGGGA	113	1,1,1,1,1
Lib10^4 1 ng	AAAGGGAGAAAT	AAAGGAAGAAAT,AAAGGGAGAGAT,ATAGGGAGAAAT	135	1,1,1
Lib10^4 1 ng	AAAGGGATATGT	AAAGGAATATGT,AAAGGCATATGT,AAAGGTATATGT	159	1,1,3
Lib10^4 1 ng	AAAGGGGCGAGT	AAAAGGGCGAGT,AAACGGGCGAGT,AAAGGAGCGAGT,AAAGGGGCGGGT,AAAGGGGCGTGT,AAAGGGGTGAGT,AAGGGGGCGAGT,ACAGGGGCGAGT	70	1,1,1,1,1,1,1,1
Lib10^4 1 ng	AAAGGGTAGTCG	AAAGCGTAGTCG,AAAGGGTAGGCG,AAATGGTAGTCG	159	1,1,1
Lib10^4 1 ng	AAAGGTAATATG	AAAGGTAATCTG,AAAGGTNATATG	128	1,1
Lib10^4 1 ng	AAAGGTTTTGGC	AAAGGTTTTGGT	94	1
Lib10^4 1 ng	AAAGTACGTTGG	AAAGTACGATGG,AAAGTACGCTGG,AAAGTACGGTGG,AAAGTACGTAGG,AAAGTACGTTGC	162	1,1,2,1,1
Lib10^4 1 ng	AAAGTAGTTACA	AAACTAGTTACA,AAAGTAGATACA,AAAGTAGTGACA,AAAGTNGTTACA,AATGTAGTTACA	171	2,1,1,1,1
Lib10^4 1 ng	AAAGTCGTGTCG	AAATTCGTGTCG	133	1
Lib10^4 1 ng	AAAGTTGGGGGT	AAAGTTGGGGGG,AAAGTTGGGTGT,AAAGTTGGTGGT	138	1,1,1
Lib10^4 1 ng	AAATAGCTGCAG	AAATAGCAGCAG,AAATAGCTGCCG,AAATAGCTGCTG,AAATAGCTGGAG,AAATGGCTGCAG	112	1,1,2,1,1
Lib10^4 1 ng	AAATATAGTTCA		118
Lib10^4 1 ng	AAATATTTTTAT	AATTATTTTTAT,ACATATTTTTAT,AGATATTTTTAT	79	1,1,1
Lib10^4 1 ng	AAATCATATATG	AAACCATATATG,AAAGCATATATG,AAATCATATTTG	89	1,1,1
Lib10^4 1 ng	AAATCCTAGATA	AAATCCTAAATA,AAATCCTAGTTA	55	1,1
Lib10^4 1 ng	AAATCCTATCTA	AAATCCTNTCTA,AAATCNTATCTA,TAATCCTATCTA	82	1,1,1
Lib10^4 1 ng	AAATCGATATAC	AATTCGATATAC	91	1
Lib10^4 1 ng	AAATCGCGGAGA	AAATCGCGGGGA,AAATCGCGGTGA	110	1,1
Lib10^4 1 ng	AAATCGGTTGAC	AAATCGGATGAC,AAATCGGCTGAC,AAATCGGTAGAC,AAATCGGTTGTC,AATTCGGTTGAC	113	2,3,1,1,1
Lib10^4 1 ng	AAATCTTAGTTT	ACATCTTAGTTT,AGATCTTAGTTT	58	1,1
Lib10^4 1 ng	AAATCTTGACTC	AAATCTTGTCTC,AGATCTTGACTC	53	2,1
Lib10^4 1 ng	AAATGACTTACT	AAAAGACTTACT,AAATGTCTTACT	133	1,1
Lib10^4 1 ng	AAATGCCGAACG	AAATGCCGTACG,ATATGCCGAACG	122	1,1
Lib10^4 1 ng	AAATGGAGGCCG	AAATGCAGGCCG,AAATGGGGGCCG,AAATGGNGGCCG,AAATGGTGGCCG,AATTGGAGGCCG	173	1,2,1,6,1
Lib10^4 1 ng	AAATGTTTCCCT	AAATCTTTCCCT,AAATGGTTCCCT,ATATGTTTCCCT	104	2,1,1
Lib10^4 1 ng	AAATTAAGTGAT	AAATTAAGTGGT	69	1
Lib10^4 1 ng	AAATTCCTTGGT		125
Lib10^4 1 ng	AAATTGAGGTAT	AAATTGAGGTTT,AAATTGCGGTAT	166	1,3
Lib10^4 1 ng	AAATTGATCCCA	AAATTGGTCCCA,AAATTGTTCCCA	177	3,2
Lib10^4 1 ng	AAATTGGAACGT	AAATTGGAACAT,AAATTGGTACGT	144	1,1
Lib10^4 1 ng	AAATTGTAAGCA	AAATTGTAATCA	80	1
Lib10^4 1 ng	AAATTTAGATTC	AAATTTAGTTTC,GAATTTAGATTC	111	2,1
Lib10^4 1 ng	AAATTTATATAG	AAATTTATATGG,AAATTTATATTG	82	2,1
Lib10^4 1 ng	AAATTTCCAAGG	AAATTTCCAAGC,TAATTTCCAAGG	82	1,1
Lib10^4 1 ng	AAATTTCGATGA	AAATTTCGATGG,AAATTTCGATGT,AAATTTCGGTGA,AAATTTCGTTGA,AGATTTCGATGA	231	1,2,3,1,1
Lib10^4 1 ng	AAATTTGGACTT	AAATTTCGACTT,AAATTTGCACTT,AAATTTGGAATT,AAATTTGGANTT,AAATTTGGTCTT,AAATTTGTACTT	248	1,1,1,1,3,1
Lib10^4 1 ng	AAATTTTCCTGT	AAATTTACCTGT,AATTTTTCCTGT	123	1,1
Lib10^4 1 ng	AAATTTTGTACT	AAATTATGTACT	145	1
Lib10^4 1 ng	AACAAATCGACA	AACAAATCGTCA,AAGAAATCGACA	109	1,1
Lib10^4 1 ng	AACACGAGAGTC	AACACGAGAATC,AACACGAGAGGC,AACACGAGTGTC,AACACGANAGTC,AACACGGGAGTC,AACACGTGAGTC	136	1,1,2,1,1,1
Lib10^4 1 ng	AACACGGGTATA	AACACCGGTATA,AACACGGGAATA,AACACGGGGATA,AGCACGGGTATA,TACACGGGTATA	192	1,2,2,1,1
Lib10^4 1 ng	AACACGTTTACG	ATCACGTTTACG,TACACGTTTACG	153	1,1
Lib10^4 1 ng	AACACTGTGCTG	AACACTGGGCTG,AACACTGTGCTA	160	1,1
Lib10^4 1 ng	AACAGTGGGCGA	AACAGAGGGCGA,AACAGTGAGCGA,AAGAGTGGGCGA,ATCAGTGGGCGA	132	2,1,1,1
Lib10^4 1 ng	AACATGAGGGGT	AACATGAGCGGT,AACATGAGGGAT,AACATGANGGGT,AACATGTGGGGT	146	1,1,1,1
Lib10^4 1 ng	AACATGGTGCTG	AACATGGTGATG,AACATGGTGCTA	134	1,1
Lib10^4 1 ng	AACATGTGTCGC	AACATGGGTCGC,AACATGTGGCGC,AACATGTNTCGC	151	2,1,1
Lib10^4 1 ng	AACCAAGGTGTA		55
Lib10^4 1 ng	AACCACGGGCGA	AAACACGGGCGA,AACCACGGACGA,AACCACGGCCGA,AACCACGGGCGC,AACCACGGGCGG,AACCACGGGCGT,AACCACGGGGGA,AACCATGGGCGA,ATCCACGGGCGA	201	1,1,1,1,1,1,1,1,1
Lib10^4 1 ng	AACCACTCCCGT	AACCACCCCCGT,AACCACTCCCGC,AACCATTCCCGT	134	1,1,1
Lib10^4 1 ng	AACCAGTTTTGC	AACCAGGTTTGC	77	1
Lib10^4 1 ng	AACCATTCGGCC	AACCATTCGCCC,GACCATTCGGCC	88	1,1
Lib10^4 1 ng	AACCATTCGTTT	AACCATTAGTTT,AACCATTCGATT,AACCATTCGCTT,AACCATTCGTGT	97	1,1,1,1
Lib10^4 1 ng	AACCCACTTCAT	ATCCCACTTCAT	116	1
Lib10^4 1 ng	AACCCCTAGCTA		91
Lib10^4 1 ng	AACCCTAATGTC	AACCCTAAGGTC,ATCCCTAATGTC	174	1,1
Lib10^4 1 ng	AACCCTTAAAGG	AACCCTTAAGGG	116	1
Lib10^4 1 ng	AACCGGCGTCCC	AACCGCCGTCCC,AACCGGCGTACC,AACCGGCGTGCC	127	1,1,1
Lib10^4 1 ng	AACCGTCGCTGG	AACCGACGCTGG,AACCGTCGCAGG,AACCGTCGCCGG,AGCCGTCGCTGG	134	1,1,1,1
Lib10^4 1 ng	AACCTCCCCACT		110
Lib10^4 1 ng	AACCTGTAGTTC	AACCTGTAGATC,AACCTGTAGTGC,AACCTGTTGTTC,AACGTGTAGTTC	122	2,1,1,1
Lib10^4 1 ng	AACCTTCTTCAT	AACCTTCTTAAT,ATCCTTCTTCAT	152	1124
Lib10^4 1 ng	AACCTTTAGTTA	AACCTTCAGTTA,ATCCTTTAGTTA	147	1,1
Lib10^4 1 ng	AACCTTTTAAAG	AACCTTTTAAGG	114	1
Lib10^4 1 ng	AACCTTTTTTAA		103
Lib10^4 1 ng	AACGAAGGAATC	AACGAAGAAATC,AACGAAGGAGTC,AACGAAGGGATC,AACGANGGAATC,AACGCAGGAATC,AGCGAAGGAATC,ATCGAAGGAATC	150	1,1,3,1,1,1,2
Lib10^4 1 ng	AACGACAGCTGG	AACGACAGCAGG,AACGACNGCTGG,AACGGCAGCTGG,AACGTCAGCTGG,AGCGACAGCTGG,CACGACAGCTGG	138	1,1,1,1,1,1
Lib10^4 1 ng	AACGACGGCTCA	AACGACGGCACA,AACGGCGGCTCA,AACGTCGGCTCA	140	1,2,3
Lib10^4 1 ng	AACGAGCGAATA	AACGAGCGAACA	143	1
Lib10^4 1 ng	AACGCACGCGCT	AACGCACGCTCT	123	1
Lib10^4 1 ng	AACGCGTATGTC	AACGCCTATGTC,AACGCGGATGTC,AACGCGTAAGTC,AACGCGTATGGC,AACGCGTNTGTC,AACGNGTATGTC	208	1,1,1,1,2,1
Lib10^4 1 ng	AACGCTGCGCCC	ATCGCTGCGCCC	184	1
Lib10^4 1 ng	AACGGCAGTCTT	AACGGCAGCCTT,AACGGCAGGCTT,AACGGCAGTCTA,AACGGCAGTGTT	151	1,1,1,1
Lib10^4 1 ng	AACGGCTAACTG	AACGGCGAACTG,AACGGCTAGCTG,ACCGGCTAACTG,GACGGCTAACTG	120	1,1,1,1
Lib10^4 1 ng	AACGGGTCCGAG	AACGGGTCCGGG,AACGGGTCCGTG	96	3,4
Lib10^4 1 ng	AACGGGTGAAAT	AACGGGGGAAAT,AACGGNTGAAAT	100	1,1
Lib10^4 1 ng	AACGGGTGACGT	AACGGGAGACGT,AACGGGGGACGT,AACGGGTGCCGT,AACGGGTGTCGT	56	1,1,1,2
Lib10^4 1 ng	AACGGGTTCCGG	AACGGGGTCCGG,AACGGGTTCCTG,AATGGGTTCCGG	81	1,1,1
Lib10^4 1 ng	AACGGTCCTGTG	AACGGTCCTGAG,AATGGTCCTGTG,ACCGGTCCTGTG,ATCGGTCCTGTG	179	1,1,1,1
Lib10^4 1 ng	AACGGTCTGAGT	AACCGTCTGAGT,AACGGTCTGTGT	77	1,1
Lib10^4 1 ng	AACGGTTATATA	AACAGTTATATA,AACGGATATATA,AACGGGTATATA,AACGGTAATATA,AACGGTNATATA,AACGGTTAAATA,AACGGTTATTTA,AACGTTTATATA	212	1,2,1,1,1,1,1,1
Lib10^4 1 ng	AACGTCAAGGTC	AACGTCAAGCTC,AACGTCAAGGAC,AACGTCAAGGGC,AACGTCAAGGTA,AACGTCAAGTTC,AAGGTCAAGGTC,ATCGTCAAGGTC	225	1,1,1,1,1,1,1
Lib10^4 1 ng	AACGTCGGTTTT	AACGACGGTTTT,AACGTCGGATTT,AACGTCGGCTTT,AACGTCGGGTTT,AATGTCGGTTTT	78	1,2,3,1,1
Lib10^4 1 ng	AACGTGTGTCTA	AACGTGTGACTA	127	1
Lib10^4 1 ng	AACGTTACCTCA	AACGTTATCTCA	171	1
Lib10^4 1 ng	AACGTTAGGTAA	AACGTGAGGTAA,AACGTTAGATAA,ATCGTTAGGTAA	145	1,1,1
Lib10^4 1 ng	AACGTTTCGACC	AACGTTTCGACT,AACGTTTCGCCC,AACGTTTCGGCC,AACGTTTCGTCC,AGCGTTTCGACC	149	1,2,1,6,1
Lib10^4 1 ng	AACGTTTTGTGC	AACGTCTTGTGC,AACGTTTTGGGC,AACGTTTTGTAC	172	1,1,1
Lib10^4 1 ng	AACTAACGGTGG	AACCAACGGTGG,AACTAACGGGGG,AACTAACGGTGC	177	1,1,1
Lib10^4 1 ng	AACTAACTCAAT	AACNAACTCAAT,AACTATCTCAAT,AANTAACTCAAT	100	1,1,1
Lib10^4 1 ng	AACTAATCACTA	AACAAATCACTA,AACTAATCACTC,AACTAATCAGTA,AACTAATGACTA	294	1,1,1,1
Lib10^4 1 ng	AACTAATGTAAT	AACTAGTGTAAT	104	1
Lib10^4 1 ng	AACTACAACTAA	AACTCCAACTAA,AACTTCAACTAA	92	1,1
Lib10^4 1 ng	AACTAGATTATG	AACTAGATTATC,AGCTAGATTATG	97	1,1
Lib10^4 1 ng	AACTAGTATCAG	AACTAATATCAG,AACTAGAATCAG,AACTAGTACCAG,AACTAGTATCTG,AACTANTATCAG	143	1,2,1,1,1
Lib10^4 1 ng	AACTATAATATT		74
Lib10^4 1 ng	AACTATAATTAA	AACTATAATTAG,AACTATAATTCA,AACTATANTTAA,AACTTTAATTAA	239	1,1,1,1
Lib10^4 1 ng	AACTATCGTACC	AACTACCGTACC,AGCTATCGTACC	199	1,1
Lib10^4 1 ng	AACTATGTTGAC	AACTATGTTGCC,AACTATGTTGGC,AACTATGTTGTC,AACTTTGTTGAC	189	1,1,2,1
Lib10^4 1 ng	AACTATTCTGGT	AACNATTCTGGT,AACTAGTCTGGT,AACTATTCTGCT,AACTATTTTGGT,AGCTATTCTGGT	62	1,1,1,1,1
Lib10^4 1 ng	AACTATTGGGTT	AACTATTCGGTT	55	1
Lib10^4 1 ng	AACTCATGTTAG	AACTCATGTAAG	146	1
Lib10^4 1 ng	AACTCTATTCGG	AACTCTATTAGG	155	1
Lib10^4 1 ng	AACTCTCTAGGC	AACTCTGTAGGC,ATCTCTCTAGGC	125	1,1
Lib10^4 1 ng	AACTCTTACTTA	AACACTTACTTA,AACTCGTACTTA,AACTCNTACTTA,AACTCTTACATA,ATCTCTTACTTA	147	1,1,1,1,1
Lib10^4 1 ng	AACTCTTTGTGG	AACTCTTAGTGG,AACTCTTTATGG,AACTCTTTGGGG,ATCTCTTTGTGG	176	1,1,2,1
Lib10^4 1 ng	AACTGCACTTTC	AACCGCACTTTC,AACNGCACTTTC,AACTGCACTGTC,AACTGCACTTCC,AACTGCCCTTTC,AACTGGACTTTC,AGCTGCACTTTC,TACTGCACTTTC	294	1,1,1,1,1,1,1,1
Lib10^4 1 ng	AACTGCATGTTA	AACCGCATGTTA,AACTGAATGTTA,AACTGCATGATA,AACTGGATGTTA,AACTGTATGTTA	170	1,1,1,1,1
Lib10^4 1 ng	AACTGGATCACT	ATCTGGATCACT	141	1
Lib10^4 1 ng	AACTGGGATAAC	AACTGGGATAGC,AACTGGGGTAAC,AACTGGGTTAAC	119	1,1,2
Lib10^4 1 ng	AACTGGTCCACT	AACTGGCCCACT,AACTTGTCCACT,ATCTGGTCCACT	187	1,1,1
Lib10^4 1 ng	AACTGTCGTTGC	AACTGCCGTTGC,AACTGGCGTTGC,AACTGNCGTTGC,AACTGTCGATGC,AACTGTCGGTGC,AACTGTCGTCGC,AACTGTCGTTCC,AACTGTCNTTGC,AACTGTGGTTGC	230	1,1,1,1,1,1,1,1,1
Lib10^4 1 ng	AACTGTTATAGA	AACAGTTATAGA,AACTGNTATAGA,AACTGTTATAGG,AACTGTTATAGT	177	1,1,1,1
Lib10^4 1 ng	AACTGTTTGCCG	AACTGATTGCCG,AACTGTTCGCCG,AATTGTTTGCCG,ACCTGTTTGCCG	148	2,1,111,1
Lib10^4 1 ng	AACTTAATGGAC		122
Lib10^4 1 ng	AACTTATACTAG	AACTTANACTAG	80	1
Lib10^4 1 ng	AACTTCGCCTGA	AACATCGCCTGA,AACGTCGCCTGA,AACTTCGCCTGT	136	1,1,1
Lib10^4 1 ng	AACTTCGGTAGA	AACTGCGGTAGA,AACTTCGGTAGG,AACTTCGGTAGT,AACTTCGGTCGA	153	1,2,1,1
Lib10^4 1 ng	AACTTGGGGTAT	AACTTGNGGTAT	69	1
Lib10^4 1 ng	AACTTGTCCTTT	AACTTGACCTTT,AACTTGTCCTAT	167	1,1
Lib10^4 1 ng	AACTTGTCTTAA	ATCTTGTCTTAA,TACTTGTCTTAA	151	1,1
Lib10^4 1 ng	AACTTGTTTGTA	AACTTGGTTGTA	205	1
Lib10^4 1 ng	AACTTTCCGTGC	AACTTTCCCTGC,AACTTTCCGAGC,AACTTTCCGGGC,ATCTTTCCGTGC	153	1,1,1,1
Lib10^4 1 ng	AACTTTCGCTGT	AACCTTCGCTGT,AACNTTCGCTGT,AACTTTCGGTGT,AACTTTGGCTGT,ACCTTTCGCTGT,GACTTTCGCTGT	243	1,1,1,1,1,1
Lib10^4 1 ng	AACTTTTAACTG	AACTTNTAACTG,AACTTTTACCTG	111	1,1
Lib10^4 1 ng	AACTTTTGGTGC	AACTTTTAGTGC,AACTTTTGGTGT,AACTTTTGTTGC	206	1,1,1
Lib10^4 1 ng	AACTTTTTTCAA	AACTTTATTCAA,AACTTTNTTCAA,AACTTTTTACAA,ATCTTTTTTCAA	151	1,1,1,1
Lib10^4 1 ng	AAGAACTAGTGC		94
Lib10^4 1 ng	AAGAAGATGTGT	AAGAAGATGTGA,AAGAAGATGTGC,AAGAAGGTGTGT,AAGAGGATGTGT,AAGGAGATGTGT,AAGTAGATGTGT	208	1,1,1,1,1,1
Lib10^4 1 ng	AAGAATGTAGCT	AAGAATGTTGCT	137	2
Lib10^4 1 ng	AAGACAACTGTT	AAGACAACTGGT,AAGACAACTGTA,AAGACAANTGTT,AATACAACTGTT	149	1,1,1,1
Lib10^4 1 ng	AAGACTCTCGGC	AAGACNCTCGGC,AAGTCTCTCGGC,ANGACTCTCGGC	99	1,1,1
Lib10^4 1 ng	AAGACTGGCCAT	AAGATTGGCCAT,AAGGCTGGCCAT	80	1,1
Lib10^4 1 ng	AAGAGCAACGCC	AAGTGCAACGCC,AGGAGCAACGCC,ATGAGCAACGCC	104	1,1,1
Lib10^4 1 ng	AAGAGGGCTGTC	AAGAGAGCTGTC,AAGAGGCCTGTC,AAGTGGGCTGTC	131	1,1,1
Lib10^4 1 ng	AAGAGTCGTTTA	AAGAGTCGTATA	46	1
Lib10^4 1 ng	AAGATGGGGTAG	AAGATGGGATAG,AAGATGTGGTAG	139	1,1
Lib10^4 1 ng	AAGATGGTTTTT	AAGATGCTTTTT,AAGATGGTCTTT,AAGATGGTTTGT	188	1,1,1
Lib10^4 1 ng	AAGATGTATTTG	AAGATGTAATTG,AAGATGTATATG,AAGGTGTATTTG,AAGNTGTATTTG	179	1,1,1,1
Lib10^4 1 ng	AAGATTACTATC	AAGATTTCTATC,ATGATTACTATC	110	1,1
Lib10^4 1 ng	AAGATTCAGTCT	AAGATTCTGTCT,AAGGTTCAGTCT,ATGATTCAGTCT	167	1,1,2
Lib10^4 1 ng	AAGATTGGTACA		124
Lib10^4 1 ng	AAGATTGTAGTC	AAGATTGGAGTC,AAGATTGTAGAC	82	1,1
Lib10^4 1 ng	AAGATTTCGCTC	ATGATTTCGCTC	187	1
Lib10^4 1 ng	AAGCAAGACGTA	AAGCAAAACGTA,AAGCAAGAAGTA,AAGCAAGACCTA	63	1,1,1
Lib10^4 1 ng	AAGCACGTTCTT	AAGCAAGTTCTT,AAGCACGCTCTT,AGGCACGTTCTT	90	1,1,1
Lib10^4 1 ng	AAGCAGGCGTGC	AAGCAGGCGAGC,AAGCAGGCGGGC,AAGCAGGGGTGC,AAGCTGGCGTGC,AGGCAGGCGTGC,ATGCAGGCGTGC	368	1,2,1,2,1,1
Lib10^4 1 ng	AAGCATGATATG	AAGCATGATTTG,AAGCATGTTATG,TAGCATGATATG	133	1,1,1
Lib10^4 1 ng	AAGCATTAATTG		121
Lib10^4 1 ng	AAGCATTTTGGC	AAGCATTTTGTC,AATCATTTTGGC,ATGCATTTTGGC	148	2,1,1
Lib10^4 1 ng	AAGCCAGTCTGC	AAGCCAGTCTGG,ACGCCAGTCTGC,ATGCCAGTCTGC	156	1,1,1
Lib10^4 1 ng	AAGCCCTTATTG	AAGCCCTTAGTG,AAGCCCTTATAG,AAGCCCTTATCG	111	1,1,1
Lib10^4 1 ng	AAGCCGTTTTGT	AAGCCCTTTTGT,AAGCCGTTTAGT,AAGNCGTTTTGT,ATGCCGTTTTGT,TAGCCGTTTTGT	167	1,1,1,1,1
Lib10^4 1 ng	AAGCCTATGTAC	AAGCCTANGTAC,AAGCCTATGCAC,AAGCCTATGGAC,ATGCCTATGTAC	162	1,1,1,1
Lib10^4 1 ng	AAGCGCGGTGCC	AAGCACGGTGCC,AAGCCCGGTGCC,AAGCGCGGAGCC,AAGCGCGGTGGC,AAGCGNGGTGCC,ACGCGCGGTGCC,ATGCGCGGTGCC	237	1,1,1,1,1,1,1
Lib10^4 1 ng	AAGCGCTGACGG	AAGCGCGGACGG,AAGCGCTGATGG,AAGCGCTGCCGG,AAGCGCTGGCGG,AAGCGCTGTCGG,AAGCGGTGACGG,AAGNGCTGACGG	192	1,1,1,4,5,1,1
Lib10^4 1 ng	AAGCGGCATAAT	AAGCGGCATAAG,AAGCGTCATAAT,ATGCGGCATAAT	141	1,1,1
Lib10^4 1 ng	AAGCGGTGCCCC	AAGCCGTGCCCC,AAGCGATGCCCC,AAGCGGAGCCCC,AAGCGNTGCCCC,AAGGGGTGCCCC,AAGNGGTGCCCC	189	1,1,1,1,1,1
Lib10^4 1 ng	AAGCGGTGGTGC	AAGCGGTGGAGC,AAGCGGTGGGGC,AAGGGGTGGTGC	266	1,1,2
Lib10^4 1 ng	AAGCGTATAATT		118
Lib10^4 1 ng	AAGCGTATCAGC	AAGCGTATCTGC,AAGCGTNTCAGC,ACGCGTATCAGC,ATGCGTATCAGC	146	1,1,1,3
Lib10^4 1 ng	AAGCGTGATTGT	AAGCGNGATTGT,AAGCGTGATAGT,AAGCGTGATTGG,ATGCGTGATTGT	138	1,1,1,1
Lib10^4 1 ng	AAGCGTGGGATC	AAGCGCGGGATC,AAGCGTGGGCTC	95	1,1
Lib10^4 1 ng	AAGCGTTGTTTT	AAACGTTGTTTT,AAGCCTTGTTTT,AAGCGTAGTTTT,AAGCGTCGTTTT,AAGCGTTGTCTT,AAGCGTTGTGTT	88	1,1,1,1,1,1
Lib10^4 1 ng	AAGCTCACAGGA	AAGCTAACAGGA,AAGCTCACACGA,AAGCTCACAGGG,AAGCTCACTGGA,AAGGTCACAGGA	190	1,1,1,1,1
Lib10^4 1 ng	AAGCTGTAAACA	AAGCTGCAAACA,AAGCTGGAAACA,AAGCTGTAAAGA,ATGCTGTAAACA	151	1,1,1,1
Lib10^4 1 ng	AAGCTTCGGTTC		44
Lib10^4 1 ng	AAGCTTGGACGG	AACCTTGGACGG,AAGCTTGGGCGG,AAGCTTGGTCGG,TAGCTTGGACGG	174	1,1,7,1
Lib10^4 1 ng	AAGCTTTTTGGT	AAGCTNTTTGGT,ATGCTTTTTGGT	96	1,1
Lib10^4 1 ng	AAGGAATCACCA	AAGGAANCACCA,AAGGAGTCACCA,AAGGATTCACCA,AAGGTATCACCA	165	1,1,1,2
Lib10^4 1 ng	AAGGAGACTATA	AAGAAGACTATA,AAGGAGATTATA,AAGGGGACTATA,AAGGTGACTATA	213	1,1,3,4
Lib10^4 1 ng	AAGGAGTGCGTG	AAGGAGAGCGTG,AAGGAGTCCGTG,AAGGAGTGCCTG,AAGGAGTGCGGG,AAGGAGTGCGTC,AAGGGGTGCGTG,AAGGTGTGCGTG	167	1,1,1,2,1,1,3
Lib10^4 1 ng	AAGGATCAGAGG	AAAGATCAGAGG,AAGGATCAGGGG,AAGGTTCAGAGG,AATGATCAGAGG	159	1,1,2,1
Lib10^4 1 ng	AAGGATCGATTG	AAGGATCGTTTG,AAGGTTCGATTG	48	2,1
Lib10^4 1 ng	AAGGCAAGAGGA	AAGGCAAGAGGT,AAGGCAAGGGGA,AAGGCAAGTGGA	150	1,1,1
Lib10^4 1 ng	AAGGCAGTCCGC		72
Lib10^4 1 ng	AAGGCATGGGTC	AAGGCATGTGTC	185	1
Lib10^4 1 ng	AAGGCCGTATGG	AAGGACGTATGG,AAGGCCGAATGG,AAGGTCGTATGG,AGGGCCGTATGG	164	1,1,2,133
Lib10^4 1 ng	AAGGCGCACTCA	AAGGAGCACTCA,ATGGCGCACTCA	118	1,1
Lib10^4 1 ng	AAGGCGCGCTTC	AAGGCGCACTTC,AAGGCGGGCTTC,AAGTCGCGCTTC,AGGGCGCGCTTC,ATGGCGCGCTTC	232	1,1,1,1,1
Lib10^4 1 ng	AAGGCGGTGTTT	AAGCCGGTGTTT,AAGGCCGTGTTT,AAGGCGGAGTTT,AAGGCGGGGTTT,AAGGCGGTGATT,AAGGCGGTGTGT,AAGGTGGTGTTT,ATGGCGGTGTTT	307	1,1,2,2,1,1,1,1
Lib10^4 1 ng	AAGGCTCGTTCT	AAGGGTCGTTCT,ATGGCTCGTTCT	152	2,1
Lib10^4 1 ng	AAGGCTGTTGCT	AAGGCTGGTGCT,AAGGCTNTTGCT	211	1,1
Lib10^4 1 ng	AAGGGACCCAGG	AAGGGCCCCAGG,AAGGGGCCCAGG,AAGGGTCCCAGG	119	2,1,2
Lib10^4 1 ng	AAGGGCATCGGT	AAGGGNATCGGT,AAGGGTATCGGT	79	1,1
Lib10^4 1 ng	AAGGGCTATCCG		53
Lib10^4 1 ng	AAGGGCTGAGAT	AAGGGCTGAGGT,AAGGGCTGGGAT,AAGGGCTGTGAT,AAGGGNTGAGAT,AAGGGTTGAGAT,AGGGGCTGAGAT,ATGGGCTGAGAT	55	1,2,1,1,1,1,1
Lib10^4 1 ng	AAGGGGCAAGTA	AAGGAGCAAGTA,AAGGGCCAAGTA,AAGGTGCAAGTA	74	1,1,1
Lib10^4 1 ng	AAGGGGGACCTG	AAGGGGGGCCTG,AAGGGTGACCTG	176	1,1
Lib10^4 1 ng	AAGGGGTCCGTT	AAGGGGACCGTT,AAGGGGGCCGTT,AAGGGGTCCCTT,AAGGGGTTCGTT	110	1,1,1,1
Lib10^4 1 ng	AAGGGGTGAGGC	AAGAGGTGAGGC,AAGGGGTGAGCC,AAGGGGTGCGGC,AAGGGGTGGGGC,AAGGGGTGTGGC	163	1,1,1,1,1
Lib10^4 1 ng	AAGGGTACTGAC	AAGGGTACTAAC,AAGGGTACTGCC,AAGGGTACTGGC,AAGGGTACTGTC,TAGGGTACTGAC	168	2,1,1,3,1
Lib10^4 1 ng	AAGGGTGAGTCG	AAGGCTGAGTCG,AAGGGGGAGTCG,AAGGGNGAGTCG,AAGGGTGAGCCG,AAGGGTGCGTCG,AAGGGTGGGTCG,AAGGGTGTGTCG	169	1,1,1,2,1,2,1
Lib10^4 1 ng	AAGGGTGGCCAG	AACGGTGGCCAG,AAGGGTGGCCGG,AAGGGTGGCCTG	141	1,1,1
Lib10^4 1 ng	AAGGTAAGATGT	AAGCTAAGATGT,ATGGTAAGATGT	206	1,1
Lib10^4 1 ng	AAGGTACTTGGG	AAGGTACTTGAG	86	1
Lib10^4 1 ng	AAGGTATTGGGC		78
Lib10^4 1 ng	AAGGTCCTCCTT	AAGGTCCTTCTT,AAGGTNCTCCTT,ATGGTCCTCCTT	112	1,1,1
Lib10^4 1 ng	AAGGTCTATGTA	AAGGTCGATGTA,AAGGTCTATGAA	147	1,2
Lib10^4 1 ng	AAGGTCTGATGG	AAGGTCTGCTGG,AAGGTCTGGTGG,AAGGTNTGATGG	79	2,1,1
Lib10^4 1 ng	AAGGTGAGGTGC	AAGGTGAGGAGC,AAGGTGGGGTGC,AAGGTGTGGTGC,AAGGTNAGGTGC	182	1,2,4,1
Lib10^4 1 ng	AAGGTGCTCTTC	AAGCTGCTCTTC,AAGGTGCCCTTC,AAGGTGNTCTTC,AAGGTTCTCTTC	161	1,1,1,1
Lib10^4 1 ng	AAGGTGCTGTGG	AAGGTGCTATGG,AAGGTGCTGGGG,AAGGTGNTGTGG,AAGNTGCTGTGG,ACGGTGCTGTGG	172	1,1,1,1,1
Lib10^4 1 ng	AAGGTGGCCCAT	AAGGTGACCCAT	140	1
Lib10^4 1 ng	AAGGTGGTTGTG	AAGCTGGTTGTG,AAGGTGGATGTG,AAGGTGGGTGTG,AAGGTGGTGGTG,AAGGTGGTTCTG,AAGGTGGTTGGG,AAGGTNGTTGTG,ATGGTGGTTGTG	150	2,1,1,1,1,2,1,1
Lib10^4 1 ng	AAGGTGTTATTA	AAGCTGTTATTA,AAGGTCTTATTA	210	1,1
Lib10^4 1 ng	AAGGTTCTCTGT	ATGGTTCTCTGT	170	1
Lib10^4 1 ng	AAGGTTTCCTTG		149
Lib10^4 1 ng	AAGGTTTGCATG	AAGATTTGCATG,AAGGGTTGCATG,AAGGTCTGCATG,AAGGTTAGCATG,AAGGTTTGAATG,AAGGTTTGCAGG	223	1,1,1,1,1,1
Lib10^4 1 ng	AAGGTTTTTTGG	AAGGTTTTATGG,AAGGTTTTCTGG,AAGGTTTTGTGG,AAGGTTTTTTGC	184	1,1,1,1
Lib10^4 1 ng	AAGTAGATGTAA	AAGCAGATGTAA,AAGGAGATGTAA,AAGTAGATGTAG,ATGTAGATGTAA	189	2,1,1,1
Lib10^4 1 ng	AAGTAGCATGCC	AAGCAGCATGCC,AAGTAGCAAGCC,AAGTAGCCTGCC	140	1,1,1
Lib10^4 1 ng	AAGTAGTTTAGT	AAGCAGTTTAGT,AAGGAGTTTAGT,AAGTAGTTTAGA	136	1,1,1
Lib10^4 1 ng	AAGTATCCCCTC		90
Lib10^4 1 ng	AAGTATCGAGAA	AAGGATCGAGAA,AAGTAGCGAGAA,ATGTATCGAGAA	108	1,1,1
Lib10^4 1 ng	AAGTATTAGCGT	AAATATTAGCGT,AAGCATTAGCGT	84	1,1
Lib10^4 1 ng	AAGTCAATGCAC	AAGGCAATGCAC,ACGTCAATGCAC	157	4,1
Lib10^4 1 ng	AAGTCCCCTCTG	TAGTCCCCTCTG	207	2
Lib10^4 1 ng	AAGTCCGCCGTA	AAGACCGCCGTA,AAGTCCTCCGTA,GAGTCCGCCGTA	134	1,1,1
Lib10^4 1 ng	AAGTCCTAATCC	AAATCCTAATCC,AAGACCTAATCC,AAGGCCTAATCC,AAGTCCTAATCT,AAGTCCTACTCC,AAGTCCTATTCC,AAGTGCTAATCC,ACGTCCTAATCC	194	1,1,1,1,1,1,1,1
Lib10^4 1 ng	AAGTCGGGACTT	AAGTCGGAACTT,AAGTCGGGAGTT,AAGTCGGNACTT,ATGTCGGGACTT,GAGTCGGGACTT,TAGTCGGGACTT	140	1,1,1,1,1,1
Lib10^4 1 ng	AAGTCTACGCAA	AAATCTACGCAA,AAGACTACGCAA,AAGTCTACGCTA,AAGTCTTCGCAA,ATGTCTACGCAA	363	1,1,1,1,1
Lib10^4 1 ng	AAGTGACTGCAT		45
Lib10^4 1 ng	AAGTGAGCATGT	AAGTCAGCATGT,AAGTGGGCATGT,AAGTGTGCATGT	132	1,1,3
Lib10^4 1 ng	AAGTGAGTTCGT	AAATGAGTTCGT,AAGGGAGTTCGT,AAGTGAGATCGT,AAGTGGGTTCGT,AAGTGTGTTCGT	82	1,1,2,1,1
Lib10^4 1 ng	AAGTGCTCAGTC	AAGNGCTCAGTC,AGGTGCTCAGTC	105	1,1
Lib10^4 1 ng	AAGTGCTTTTCC	AAGAGCTTTTCC,AAGNGCTTTTCC,ATGTGCTTTTCC	158	1,1,2
Lib10^4 1 ng	AAGTGGAAAATA	AAGTGGAAAAAA,AAGTGGANAATA,AAGTGGTAAATA,AAGTGTAAAATA	165	1,1,1,1
Lib10^4 1 ng	AAGTGGACAATC	AAGTCGACAATC,AAGTGGACAGTC,AAGTGGTCAATC	103	1,1,1
Lib10^4 1 ng	AAGTGGTCCAGG	AAGTGGGCCAGG,TAGTGGTCCAGG	69	1,1
Lib10^4 1 ng	AAGTGGTTCATT	AAGTGGGTCATT,AGGTGGTTCATT	156	2,1
Lib10^4 1 ng	AAGTGTATGACA	AAGGGTATGACA,AAGTGTATGATA,AAGTGTATGGCA,AAGTGTATGTCA,ACGTGTATGACA,GAGTGTATGACA	150	1,1,3,1,1,1
Lib10^4 1 ng	AAGTGTCCAATT		51
Lib10^4 1 ng	AAGTGTGGACGC	AAGTATGGACGC,AAGTGGGGACGC,AAGTGTGGGCGC,AAGTGTGGTCGC	190	1,1,2,5
Lib10^4 1 ng	AAGTGTGTTGAG	AAGTGNGTTGAG,AAGTGTGTTGCG,AAGTGTGTTGGG,AAGTGTGTTGTG	179	2,1,4,12
Lib10^4 1 ng	AAGTGTGTTTTT	AAGTCTGTTTTT,AAGTGNGTTTTT,ATGTGTGTTTTT	126	1,1,1
Lib10^4 1 ng	AAGTGTTATTGA	AAGGGTTATTGA,AAGTGATATTGA,AAGTGGTATTGA,AAGTGTTATTGG,AAGTGTTATTGT	112	1,1,1,1,1
Lib10^4 1 ng	AAGTGTTTTGTT	AAGGGTTTTGTT,AAGTGTTCTGTT,AAGTGTTTGGTT,AAGTGTTTTGGT,ACGTGTTTTGTT	117	1,1,1,1,1
Lib10^4 1 ng	AAGTTAAAGTTG	AAGATAAAGTTG,AAGNTAAAGTTG,AAGTTAANGTTG,AAGTTTAAGTTG,CAGTTAAAGTTG	138	1,1,1,1,1
Lib10^4 1 ng	AAGTTAACTCTT	AAGATAACTCTT,AAGGTAACTCTT,AAGTTAACTCAT,AAGTTAATTCTT,AAGTTTACTCTT	137	3,1,1,1,1
Lib10^4 1 ng	AAGTTAGGGCGT	AACTTAGGGCGT,AAGTTAGGGCCT,AAGTTAGGGTGT,AAGTTAGNGCGT,AAGTTTGGGCGT,ACGTTAGGGCGT,ANGTTAGGGCGT,ATGTTAGGGCGT,GAGTTAGGGCGT	153	1,1,1,1,1,1,1,1,1
Lib10^4 1 ng	AAGTTATATACA	AAGCTATATACA,AAGTTATACACA	98	1,1
Lib10^4 1 ng	AAGTTATCTGAG	AAGGTATCTGAG,AAGTTATCTGGG,AAGTTATCTGTG,AAGTTATNTGAG	163	1,7,10,1
Lib10^4 1 ng	AAGTTCCTCGTA	AAGTTCCTCCTA,AAGTTCCTCGAA,AAGTTCCTCGTG,GAGTTCCTCGTA	166	1,1,1,1
Lib10^4 1 ng	AAGTTCCTGGGC	AAGGTCCTGGGC,AAGTTCCTAGGC,AAGTTCCTGGGG	192	1,1,1
Lib10^4 1 ng	AAGTTGATAGGA	AAGATGATAGGA,AAGGTGATAGGA,AAGTTGATAGCA,AAGTTGATATGA,AAGTTGATTGGA,AAGTTGGTAGGA,AGGTTGATAGGA,ATGTTGATAGGA,GAGTTGATAGGA	219	2,1,1,2,1,4,1,2,1
Lib10^4 1 ng	AAGTTTGAATGA	AAGGTTGAATGA,AAGTTTGTATGA,ATGTTTGAATGA	92	1,1,1
Lib10^4 1 ng	AAGTTTGCATAA	AAGCTTGCATAA,AAGTTAGCATAA	106	1,1
Lib10^4 1 ng	AAGTTTGTAGAG	AAGTTTGGAGAG,AAGTTTGTAGGG,AAGTTTGTAGTG	61	1,2,3
Lib10^4 1 ng	AAGTTTGTCCGC	AAGATTGTCCGC,AAGGTTGTCCGC,AAGTTTGGCCGC,AAGTTTGTCTGC,AAGTTTGTTCGC	93	1,3,1,1,1
Lib10^4 1 ng	AAGTTTGTTGCC	AAGTTNGTTGCC,AAGTTTCTTGCC,AAGTTTGATGCC,AAGTTTGGTGCC	201	1,1,1,2
Lib10^4 1 ng	AAGTTTGTTGTT	AAATTTGTTGTT,AAGTTTGCTGTT,AAGTTTGTTGGT	140	1,1,1
Lib10^4 1 ng	AAGTTTTATACT	AAGCTTTATACT,AAGGTTTATACT,AAGTTTAATACT,AAGTTTTAAACT,AAGTTTTATTCT,GAGTTTTATACT	149	1,1,1,1,123,1
Lib10^4 1 ng	AATAAATTGGGC	AATAAAATGGGC,AATAAATTCGGC,AATAGATTGGGC,GATAAATTGGGC	156	1,1,1,1
Lib10^4 1 ng	AATAAATTGGTT	AATAAGTTGGTT	114	1
Lib10^4 1 ng	AATAAGACAAGC	AATAAGACAGGC,AATAAGAGAAGC,AATAAGGCAAGC,AATAAGTCAAGC,AATATGACAAGC	157	1,1,1,2,1
Lib10^4 1 ng	AATAATGTAGGG	AATAATGTAGGA,AATAATGTTGGG	131	1,2
Lib10^4 1 ng	AATACACGCCGG	TATACACGCCGG	165	1
Lib10^4 1 ng	AATACAGGCGTA	AATACAGGCCTA	123	1
Lib10^4 1 ng	AATACCTCACCA	AATACATCACCA	94	1
Lib10^4 1 ng	AATACGCTTGTT	AATACGCTGGTT,AATACGCTTCTT,AATACGCTTGAT,AATACTCTTGTT,ACTACGCTTGTT,AGTACGCTTGTT	303	1,1,3,1,1,1
Lib10^4 1 ng	AATAGAGGACTT	AATAGAGGGCTT,AATAGCGGACTT,AATAGTGGACTT	118	1,1,1
Lib10^4 1 ng	AATAGCATTTGT	AATAGCATTTGA	142	1
Lib10^4 1 ng	AATAGGAACACC	AATAGGATCACC,AATAGGTACACC,ATTAGGAACACC	80	1,1,1
Lib10^4 1 ng	AATAGGATAGTG	AATAGGCTAGTG,AATAGTATAGTG	137	1,1
Lib10^4 1 ng	AATAGGATGGAT	AATAGGATGGAA,AATAGGATGGGT,AATAGGATGGTT	170	1,1,2
Lib10^4 1 ng	AATAGGCGTGCC	AATAGNCGTGCC	196	1
Lib10^4 1 ng	AATAGGGATGAG	AATAGGCATGAG,AATAGGGATGCG,AATAGGGATGGG,AATAGGGATGTG,AATAGGGGTGAG	151	1,2,9,3,1
Lib10^4 1 ng	AATAGGGTTTAA	AATAGNGTTTAA,AATNGGGTTTAA	152	1,1
Lib10^4 1 ng	AATAGTCTAGGT	AATAGTCTAGGG,AATCGTCTAGGT	121	1,2
Lib10^4 1 ng	AATAGTTCACTG	AATAGCTCACTG,AATAGGTCACTG,AATAGTCCACTG,ACTAGTTCACTG	183	1,1,1,1
Lib10^4 1 ng	AATATACTTCCT		143
Lib10^4 1 ng	AATATATGGGAC	AATATATGGAAC,AATATATGGCAC,AATATATGGGCC,AATATATGGGGC,AATATATGGGTC	133	1,1,1,1,1
Lib10^4 1 ng	AATATATGTTTG	AATATATGTTTA	86	1
Lib10^4 1 ng	AATATCATCGTG	AATATCATCATG,AGTATCATCGTG,TATATCATCGTG	182	1,1,1
Lib10^4 1 ng	AATATCGTGGGT	AATATCGTGGCT,AATATCGTGGGA,AATATCGTGGGG	120	1,1,2
Lib10^4 1 ng	AATATCTATCTC	AATATCGATCTC	92	1
Lib10^4 1 ng	AATATCTGTCGA	AATATCTGTCGT,AATATCTGTTGA,CATATCTGTCGA	225	2,1,1
Lib10^4 1 ng	AATATGCCTTGT	AATAAGCCTTGT,AATATGCCTTGG,ACTATGCCTTGT,AGTATGCCTTGT	310	1,2,1,1
Lib10^4 1 ng	AATATGCCTTTC	AATATGCCTCTC,AATATGCCTTCC,AATATGCNTTTC	95	1,2,1
Lib10^4 1 ng	AATATGGATGAC	AATATGAATGAC,AATATGCATGAC,AATATGGATAAC	46	1,1,1
Lib10^4 1 ng	AATATGTCACCC	AATATGTCTCCC	121	1
Lib10^4 1 ng	AATATGTTACGA	GATATGTTACGA	111	1
Lib10^4 1 ng	AATATTCCGTAT	AATATTCCGGAT	128	1
Lib10^4 1 ng	AATATTCGCGTG	AATATTGGCGTG	135	1
Lib10^4 1 ng	AATATTGATGAT	AATATTGATGTT,AATATTGGTGAT	46	1,1
Lib10^4 1 ng	AATCAGATCTTC	AAGCAGATCTTC,AATCAGNTCTTC	141	1,1
Lib10^4 1 ng	AATCAGCTACTG	AATCACCTACTG,AATCAGATACTG,AATCAGCAACTG,AATCAGCTGCTG,AATTAGCTACTG	148	1,91,1,1,1
Lib10^4 1 ng	AATCAGGATTTC	AATCAGAATTTC,AATCAGGCTTTC,AATCAGTATTTC	68	1,1,1
Lib10^4 1 ng	AATCATCGGCGA	AATCATCCGCGA,AATCATCGGCGG,AATCATCGGCGT,AATCATCGGTGA,AATGATCGGCGA,AGTCATCGGCGA,GATCATCGGCGA	257	1,1,2,1,2,1,1
Lib10^4 1 ng	AATCATTATAAC	AATCATTAAAAC,AATCATTATAAG,AATGATTATAAC	90	1,1,1
Lib10^4 1 ng	AATCATTTATGG	TATCATTTATGG	100	1
Lib10^4 1 ng	AATCCAAGATCG	AATCCAAAATCG,AATCCAAGGTCG,AATCCAAGTTCG,AATTCAAGATCG,ATTCCAAGATCG	152	1,1,1,1,1
Lib10^4 1 ng	AATCCCTGGGCT	AATCCCTGGGGT,AGTCCCTGGGCT	119	1,1
Lib10^4 1 ng	AATCCCTTTTTC		54
Lib10^4 1 ng	AATCCGATAATT	AACCCGATAATT,AATCCCATAATT,AATCCGATAAAT	131	1,2,1
Lib10^4 1 ng	AATCCGCCCTGA	AATCCGACCTGA,AATCCGCCCTGG,AATCCGCCCTGT,ATTCCGCCCTGA,TATCCGCCCTGA	151	1,1,2,1,1
Lib10^4 1 ng	AATCCGCGAGTT	AATCCGCGTGTT,AATCCGCTAGTT	77	1,1
Lib10^4 1 ng	AATCCGGGTGGA	AATCCGAGTGGA,AATCCGGGCGGA,AATCCGTGTGGA,AATCCNGGTGGA,TATCCGGGTGGA	177	1,1,1,1,1
Lib10^4 1 ng	AATCCGTGAATT	AATCCGGGAATT,AATCCGTGCATT,AATCCGTGGATT,AGTCCGTGAATT	110	2,1,1,1
Lib10^4 1 ng	AATCCTCTCTCG	AATCCTCNCTCG,ATTCCTCTCTCG,TATCCTCTCTCG	141	1,1,1
Lib10^4 1 ng	AATCCTGACGTG	AATCCTGACGAG	77	1
Lib10^4 1 ng	AATCCTGGATAT	AATCCNGGATAT,AATCCTGGTTAT,AATTCTGGATAT	111	1,1,1
Lib10^4 1 ng	AATCCTTCGGTG		66
Lib10^4 1 ng	AATCGAATCTTC	AATCGTATCTTC	129	1
Lib10^4 1 ng	AATCGAATGAGG	AATCGAANGAGG,AATCGAATCAGG,AATCGAATGAGA,AATCGAATGGGG,AATCGAATGTGG,AATCGNATGAGG	206	1,1,1,3,3,1
Lib10^4 1 ng	AATCGAGGGATT	AATCCAGGGATT,AATCGAGGCATT,AATCGAGGGAAT,AATCGAGGGGTT,AATCGAGGTATT,AATCGGGGGATT,AATCGTGGGATT,AATCTAGGGATT	172	1,1,1,1,1,2,2,1
Lib10^4 1 ng	AATCGCGAGGGA	AATCGCGAGGGC	54	1
Lib10^4 1 ng	AATCGGATGGCC	AATCGGANGGCC,AATCGGATGGCG,AATCGGATGGCT,AATGGGATGGCC	177	1,1,1,1
Lib10^4 1 ng	AATCGGTATATA	AATCAGTATATA,AATCGGAATATA,AGTCGGTATATA	130	1,1,1
Lib10^4 1 ng	AATCGTATGTAT	AGTCGTATGTAT	89	1
Lib10^4 1 ng	AATCGTGGCTGA	AATCGAGGCTGA,AATCGTAGCTGA,AATCGTGGCTGC,AATCGTGGCTGG,AATCGTGGCTGT	155	2,1,1,1,1
Lib10^4 1 ng	AATCGTTAGCTG	AATCGTAAGCTG,AATCGTTAGGTG,ATTCGTTAGCTG	169	2,2,1
Lib10^4 1 ng	AATCGTTTGTAG	AATCCTTTGTAG,AATCGTTTGTTG	152	1,2
Lib10^4 1 ng	AATCGTTTTTGC	AATCGTATTTGC,AATCGTCTTTGC	94	4,1
Lib10^4 1 ng	AATCTCAGTATC	AATCTTAGTATC	96	1
Lib10^4 1 ng	AATCTCCTAGGT		70
Lib10^4 1 ng	AATCTGATGACG	AACCTGATGACG,AATCTGATGGCG,AATCTGATGTCG,AATCTGCTGACG,AATCTGTTGACG,ACTCTGATGACG	99	1,3,3,1,1,1
Lib10^4 1 ng	AATCTGATTGGA	AAACTGATTGGA,AATCTGATTGGT,AATCTGGTTGGA,AATCTGTTTGGA	132	1,2,1,1
Lib10^4 1 ng	AATCTGCTGTTC	AAACTGCTGTTC,AATGTGCTGTTC	97	1,1
Lib10^4 1 ng	AATCTTCCTGGC	AATCTTCCTGAC,AATCTTCCTGGA,AATCTTCCTGTC	77	1,1,1
Lib10^4 1 ng	AATCTTTACTTA	AATCTTTACATA,AATCTTTACTTG,ATTCTTTACTTA	170	2,1,1
Lib10^4 1 ng	AATCTTTCCACG	AATTTTTCCACG	124	1
Lib10^4 1 ng	AATCTTTGTTAT	AATCTTTGGTAT,AATCTTTGTAAT	92	1,1
Lib10^4 1 ng	AATCTTTTATGT	AATCTTTTATGA,ATTCTTTTATGT	45	1,1
Lib10^4 1 ng	AATCTTTTGATG	AATCTTTTGAGG,AATCTTTTGATA,AATCTTTTGCTG,AATCTTTTGGTG,AATCTTTTGTTG	185	1,1,4,5,7
Lib10^4 1 ng	AATGAAGGCGAA	AATGAAGGCGGA,AATGAAGGCGTA,AATGAAGGGGAA,AATGTAGGCGAA,ATTGAAGGCGAA	144	4,2,1,2,1
Lib10^4 1 ng	AATGACGTCACT	AAAGACGTCACT,AATGGCGTCACT,AATGTCGTCACT	149	1,2,2
Lib10^4 1 ng	AATGAGTGGTCC	AATCAGTGGTCC,AATGAGAGGTCC,AATGAGGGGTCC,AATGAGTCGTCC,AATGAGTGGTGC,AATGCGTGGTCC	169	1,1,3,1,2,2
Lib10^4 1 ng	AATGAGTTCCAT	AATGAGGTCCAT,AATGCGTTCCAT,AATGTGTTCCAT,ATTGAGTTCCAT	171	1,1,1,1
Lib10^4 1 ng	AATGATCCTTCA	AATGATCCTTGA,AATGATCNTTCA,AATGCTCCTTCA,AATGGTCCTTCA,AATGTTCCTTCA	123	1,1,1,6,1
Lib10^4 1 ng	AATGATTCGAAG	AATGATTCCAAG,AATGATTCGACG,AATGATTCGATG,AATGATTCGCAG,AATGGTTCGAAG	84	1,1,1,1,1
Lib10^4 1 ng	AATGCAATGTGA	AAAGCAATGTGA,AATGCAATGAGA,AATGCAATGGGA,AATGCAATGTGC,AATGCAATGTGG,AATGCAATGTGT	200	1,1,1,1,1,1
Lib10^4 1 ng	AATGCAGGTAAC	AATGCAAGTAAC,AATGCAGATAAC,AATGCAGGGAAC,AATGCAGGTAGC,AATGNAGGTAAC	173	1,1,1,1,1
Lib10^4 1 ng	AATGCATGGTTG	AAAGCATGGTTG,AATGCATGCTTG,AATGCATGGATG,AATGCATGGGTG	188	1,1,1,1
Lib10^4 1 ng	AATGCGCCCGTC	AATGCGCACGTC,AATGCGCCCGGC	189	1,1
Lib10^4 1 ng	AATGCGCTTTTC	AATGCCCTTTTC,AATGCGCCTTTC,AATGCGCNTTTC,AGTGCGCTTTTC	166	1,1,1,1
Lib10^4 1 ng	AATGCGGGCTAT	AATGCAGGCTAT,AATGCGGGCTAA,AATGCGGGCTAG,AATGCGGGGTAT,AATGCGGGTTAT	291	1,1,1,1,1
Lib10^4 1 ng	AATGCTATTAGT		116
Lib10^4 1 ng	AATGGATTTTTG	AATGGTTTTTTG,AGTGGATTTTTG	85	1,1
Lib10^4 1 ng	AATGGCCCATGC	AATGGCTCATGC	88	1
Lib10^4 1 ng	AATGGGGAGGCT	AATCGGGAGGCT,AATGAGGAGGCT,AATGGGGAGGCG,AATGGGGCGGCT,AATGGGGGGGCT,AATGGGGTGGCT	149	1,1,1,2,1,2
Lib10^4 1 ng	AATGGGGGATTT	AATCGGGGATTT,AATGGCGGATTT,AATGGGCGATTT,AATGGGGAATTT,AATGGGTGATTT	197	1,1,1,1,1
Lib10^4 1 ng	AATGGTACTATG	AATGGAACTATG,AATGGGACTATG,AGTGGTACTATG	116	1,1,1
Lib10^4 1 ng	AATGGTAGCCGT	AATGGGAGCCGT,AATGGTAGACGT,AATGGTAGCCGG,AATGGTAGGCGT,AATGGTAGTCGT,AATTGTAGCCGT,AGTGGTAGCCGT	191	1,1,3,3,1,1,1
Lib10^4 1 ng	AATGGTCTTAGC	ACTGGTCTTAGC	123	1
Lib10^4 1 ng	AATGGTGTTGGC		82
Lib10^4 1 ng	AATGGTTGTGTC	AATGGTTGGGTC	91	1
Lib10^4 1 ng	AATGTACCTCCA		92
Lib10^4 1 ng	AATGTACTCCTA	AAGGTACTCCTA,AATGAACTCCTA,AATGTACTCCTT,ATTGTACTCCTA	127	1,1,1,1
Lib10^4 1 ng	AATGTAGGCTGG	AATGAAGGCTGG,AATGTAGGCCGG,AATGTAGGCTGC,AATGTAGGGTGG,AATGTAGGTTGG,AATGTGGGCTGG,AATGTNGGCTGG	173	1,103,1,1,2,1,1
Lib10^4 1 ng	AATGTATATGTA	AATGTAAATGTA,AATGTATATGGA,AGTGTATATGTA	85	1,1,1
Lib10^4 1 ng	AATGTCAGCGGC	AATGTCAGCGAC,AGTGTCAGCGGC	128	1,1
Lib10^4 1 ng	AATGTCCTGATT	AATGTCCTGATC,AATGTCCTGATG,AATGTNCTGATT	197	1,1,1
Lib10^4 1 ng	AATGTCGAGTTG	AATGACGAGTTG,AATGTCGAGATG,AATGTCGAGCTG,AATGTCGAGGTG,AATGTCGAGTAG,AATGTCGNGTTG,AATGTCGTGTTG,AATGTGGAGTTG	140	1,1,1,2,1,1,2,1
Lib10^4 1 ng	AATGTCTCGTAT	AATGTCTCCTAT,AATGTCTCGAAT	196	1,1
Lib10^4 1 ng	AATGTCTGTGTA	AATGGCTGTGTA,AATGTCTGAGTA,AATGTCTGGGTA,AATGTCTNTGTA	120	1,1,1,1
Lib10^4 1 ng	AATGTCTTTGGC	AAGGTCTTTGGC,AATGGCTTTGGC	93	1,1
Lib10^4 1 ng	AATGTGGGCAGA	AATGTGCGCAGA,AATGTGGGCAGT,AATGTGGGCTGA,AGTGTGGGCAGA	168	1,1,1,1
Lib10^4 1 ng	AATGTGGGGCAT	AATGTGGGCCAT,AATGTGGTGCAT,AATGTGTGGCAT,ACTGTGGGGCAT	133	1,1,1,1
Lib10^4 1 ng	AATGTGGGTTCT	AATGTGGGATCT,AATGTGGGCTCT,AATGTGGGGTCT	55	2,1,1
Lib10^4 1 ng	AATGTGTCGTCT	AATGTGTCGTCA,AATGTGTCGTGT	97	1,3
Lib10^4 1 ng	AATGTGTGTTTA	ACTGTGTGTTTA	163	1
Lib10^4 1 ng	AATGTTCGACTA		153
Lib10^4 1 ng	AATGTTGTGGTT		104
Lib10^4 1 ng	AATGTTTATTGT	AATGATTATTGT	80	1
Lib10^4 1 ng	AATTAACTTCGG	AACTAACTTCGG,AATTAACTTAGG,AATTAGCTTCGG,AATTTACTTCGG	149	1,1,1,1
Lib10^4 1 ng	AATTAAGAGTTA	AATTAAGACTTA,AATTAAGCGTTA,AATTGAGAGTTA,AGTTAAGAGTTA	50	1,1,1,1
Lib10^4 1 ng	AATTAATTCTCA	AATTAATTATCA,AATTAATTCTGA,AATTACTTCTCA	183	1,1,1
Lib10^4 1 ng	AATTACAAGGTG	AATTACAGGGTG,TATTACAAGGTG	104	1,1
Lib10^4 1 ng	AATTACATTAAG	AATCACATTAAG,AATTAAATTAAG,AATTACATTAGG,AATTACATTATG,AATTACATTTAG	129	1,105,1,1,1
Lib10^4 1 ng	AATTACTACGAG	AATTACTACGCG,AATTACTACGGG,AATTACTACGTG,AATTACTATGAG	115	1,6,6,1
Lib10^4 1 ng	AATTAGATGCGG	AATTACATGCGG,AATTAGGTGCGG,AATTAGTTGCGG	90	1,1,1
Lib10^4 1 ng	AATTAGCTGACC	AATTAGCTGGCC,AATTAGCTGTCC,AATTAGNTGACC	152	1,4,1
Lib10^4 1 ng	AATTATGGTATC	AAATATGGTATC,AATTATGNTATC	143	1,1
Lib10^4 1 ng	AATTCATTAGCG	AATCCATTAGCG,AATTCATCAGCG,AGTTCATTAGCG	185	1,1,1
Lib10^4 1 ng	AATTCATTCTGC	AATTCNTTCTGC,AATTTATTCTGC	138	1,1
Lib10^4 1 ng	AATTCCCGTGCC	AATTCCCGAGCC,AATTCCCGTCCC,AATTCCCTTGCC,AATTCNCGTGCC,ATTTCCCGTGCC	112	1,2,1,1,1
Lib10^4 1 ng	AATTCCGGCGAT	AATGCCGGCGAT,AATTCCGGAGAT	106	1,1
Lib10^4 1 ng	AATTCCGTAACG	AATTCAGTAACG,AATTCCGGAACG,AATTCCGTATCG,TATTCCGTAACG	128	1,1,1,1
Lib10^4 1 ng	AATTCCGTGATG	AATTCCGTGTTG	50	1
Lib10^4 1 ng	AATTCGGTCAGT	AATTCGGTCAGG	157	1
Lib10^4 1 ng	AATTCGTAATCT	AATTCGTATTCT	128	1
Lib10^4 1 ng	AATTCGTACTTC	AATTCGTTCTTC	168	1
Lib10^4 1 ng	AATTCTCAAGAG	AATTCACAAGAG,AATTCNCAAGAG,AATTCTCAAGCG,AATTCTCAAGGG,AATTCTCAAGTG,AATTCTGAAGAG,ATTTCTCAAGAG	149	1,1,1,3,6,1,1
Lib10^4 1 ng	AATTCTCGCGCG	AAGTCTCGCGCG,AATTCTCGCGTG,AATTGTCGCGCG	96	1,1,1
Lib10^4 1 ng	AATTCTGAGGGT	AATTCTGACGGT,AATTCTGAGGCT,AATTCTGAGGGG,AATTCTGCGGGT,AATTCTGGGGGT,AATTCTGTGGGT,AATTCTNAGGGT	142	1,1,1,1,2,4,1
Lib10^4 1 ng	AATTCTGTTCGG	AATTCTGATCGG,AATTCTGTTCGC,AATTTTGTTCGG	187	1,2,1
Lib10^4 1 ng	AATTCTTTTTGT	AAATCTTTTTGT,AATTCTTTTTGA	100	1,1
Lib10^4 1 ng	AATTGAACCTGA	AAGTGAACCTGA,AATTGAACCTGG,AATTGAACCTGT,AATTGAANCTGA,AATTGCACCTGA,AATTGGACCTGA,AATTGTACCTGA	160	1,2,1,1,1,2,1
Lib10^4 1 ng	AATTGAATGGTT	AATGGAATGGTT,AATTGTATGGTT	191	1,1
Lib10^4 1 ng	AATTGATACACC	AAGTGATACACC,AATTCATACACC,AATTGATACTCC,AATTGATNCACC,AATTGCTACACC,AATTGGTACACC,AATTGTTACACC,CATTGATACACC	125	1,1,1,1,1,2,1,1
Lib10^4 1 ng	AATTGCATGATT	ATTTGCATGATT	151	1
Lib10^4 1 ng	AATTGCGATGGT		53
Lib10^4 1 ng	AATTGCTAATGC	AATTGCTAAAGC,AATTGTTAATGC	114	2,1
Lib10^4 1 ng	AATTGCTGTGTT	AATTGCNGTGTT,AATTGCTGTGAT,AATTGCTGTGCT	121	1,1,1
Lib10^4 1 ng	AATTGGATTAGG	AATTGAATTAGG	164	1
Lib10^4 1 ng	AATTGGCGCACA	AATTGCCGCACA,AATTGGCGCAGA,AATTGTCGCACA,ACTTGGCGCACA	158	1,2,1,1
Lib10^4 1 ng	AATTGTCATGAC	AATTGTCATGGC,AATTGTCATGTC,ATTTGTCATGAC,TATTGTCATGAC	111	1,1,1,1
Lib10^4 1 ng	AATTGTCATTCG	AAGTGTCATTCG,AATCGTCATTCG	205	1,1
Lib10^4 1 ng	AATTGTCGAGAA	AATTGTCGAGGA,AATTGTCGAGTA,AATTGTCGCGAA,AATTGTCGGGAA,AATTGTCGTGAA,ATTTGTCGAGAA,CATTGTCGAGAA	203	1,1,1,1,1,1,1
Lib10^4 1 ng	AATTGTGTATCA	AATTGAGTATCA,AATTGTGTACCA	303	1,1
Lib10^4 1 ng	AATTGTGTTCTT	AATTGGGTTCTT,AATTGTGGTCTT,AATTGTGTTCTG	143	2,1,1
Lib10^4 1 ng	AATTGTTATATT	AATTGATATATT,AATTGTTAAATT,AGTTGTTATATT,ATTTGTTATATT	135	1,1,1,1
Lib10^4 1 ng	AATTGTTCTGTA		134
Lib10^4 1 ng	AATTTAGGATGG	ATTTTAGGATGG	101	1
Lib10^4 1 ng	AATTTAGGCGTG		118
Lib10^4 1 ng	AATTTATGATCC	AAATTATGATCC,AATTAATGATCC,AATTTATGATCT,AATTTNTGATCC	127	1,1,1,1
Lib10^4 1 ng	AATTTCGGTGCT	AATTTCCGTGCT,AATTTNGGTGCT	193	1,2
Lib10^4 1 ng	AATTTCGTATCA	AATTTCGAATCA,AATTTNGTATCA	103	1,1
Lib10^4 1 ng	AATTTCGTGGTC	AACTTCGTGGTC	90	1
Lib10^4 1 ng	AATTTCTTACTG	AAGTTCTTACTG,AATTTCTTTCTG	66	1,1
Lib10^4 1 ng	AATTTGCATAGG	AATATGCATAGG	95	1
Lib10^4 1 ng	AATTTGGGGTGT	AATTTGTGGTGT	104	1
Lib10^4 1 ng	AATTTGTATGGC	AATTTGGATGGC,AATTTGTATGGT,AATTTGTATGTC,AATTTGTCTGGC	118	1,1,1,1
Lib10^4 1 ng	AATTTGTTATTT	AATTTATTATTT,AATTTGCTATTT,AATTTGTTAGTT,ACTTTGTTATTT	169	1,1,1,1
Lib10^4 1 ng	AATTTGTTTTCA	AATTTGCTTTCA,AATTTNTTTTCA,AGTTTGTTTTCA	157	1,1,130
Lib10^4 1 ng	AATTTTAATGTC		69
Lib10^4 1 ng	AATTTTACACCT	AATGTTACACCT,AATTTCACACCT,AATTTTACACCA,AATTTTACTCCT,ACTTTTACACCT	151	1,1,1,1,1
Lib10^4 1 ng	AATTTTATCTTG		119
Lib10^4 1 ng	AATTTTGGGCTT	AAGTTTGGGCTT,AATTTTGCGCTT	103	27,1
Lib10^4 1 ng	AATTTTTCTAAA	AATTTTACTAAA,AATTTTTCTAAT	176	1,1
Lib10^4 1 ng	AATTTTTGTTTA	AATTTTTGCTTA	62	1
Lib10^4 1 ng	ACAAAAATATGC		59
Lib10^4 1 ng	ACAAAGCACGAT	ACAAAGGACGAT,AGAAAGCACGAT	143	1,1
Lib10^4 1 ng	ACAACAGAATGA	ACAACAGCATGA,ACAACAGGATGA	152	1,1
Lib10^4 1 ng	ACAACCCTATAT	ACAACCTTATAT,ATAACCCTATAT	54	1,1
Lib10^4 1 ng	ACAAGCCTATTT	ACAAGCCTAATT,ACATGCCTATTT,CCAAGCCTATTT	126	1,1,1
Lib10^4 1 ng	ACAAGGTGCGTT		149
Lib10^4 1 ng	ACAAGTATAGGA	ACAAGAATAGGA	97	1
Lib10^4 1 ng	ACAAGTCGATCT	ACAAGGCGATCT,ACAAGTCGAGCT,ACAAGTCGGTCT	322	2,1,1
Lib10^4 1 ng	ACAAGTCTGCTG	ACAAGGCTGCTG,ACAAGTCTGCTC,ACAAGTCTGTTG,ACACGTCTGCTG	195	2,1,1,1
Lib10^4 1 ng	ACAATCAAATCC	ACAATCAAACCC	113	1
Lib10^4 1 ng	ACAATCGTTTTC	ACAATCGTATTC,ACAATCGTCTTC,ACAATCGTGTTC,ACTATCGTTTTC	67	5,3,3,2
Lib10^4 1 ng	ACAATCTTTAAG	ACAATCTTTACG,ACAATCTTTATG	71	1,1
Lib10^4 1 ng	ACAATGTGTAGT	ACAATGTGTACT	129	1
Lib10^4 1 ng	ACAATTCGTAAG	ACAATACGTAAG,ACAATTCGTATG	153	1,1
Lib10^4 1 ng	ACAATTTCGCTG	ACAATTTNGCTG	83	1
Lib10^4 1 ng	ACACACTCTTAT	ACACACTGTTAT	82	1
Lib10^4 1 ng	ACACAGCAGGGC	ACACAGCNGGGC,ACACANCAGGGC,ACANAGCAGGGC	158	1,1,1
Lib10^4 1 ng	ACACAGGCCTAG	ACACAGGCCTTG,ACACTGGCCTAG,ACATAGGCCTAG,ACTCAGGCCTAG	240	1,2,1,1
Lib10^4 1 ng	ACACATATGGGA	ACACAAATGGGA,ACACATATAGGA,ACACATATGGGG,ACACATATGTGA	180	1,1,2,1
Lib10^4 1 ng	ACACCAGCGTAT	AAACCAGCGTAT,ACACCAGCCTAT	113	1,1
Lib10^4 1 ng	ACACCCGCCCTG	ACACCCGCCTTG,ACACCTGCCCTG,GCACCCGCCCTG	148	1,1,1
Lib10^4 1 ng	ACACCCTGGTCG	ACACCCTCGTCG,ATACCCTGGTCG	146	1,1
Lib10^4 1 ng	ACACCTCACGCG		141
Lib10^4 1 ng	ACACCTTCCTTC	ACACCTTCCGTC,ACCCCTTCCTTC	83	1,1
Lib10^4 1 ng	ACACGCCCCTTT	ACACGCGCCTTT	154	1
Lib10^4 1 ng	ACACGCTACAAG	ACACGATACAAG,ACACGCTACAGG,ACACGNTACAAG	201	1,3,1
Lib10^4 1 ng	ACACGTCAATCC	ACACGCCAATCC,ACACGTCAATGC,ACACGTCTATCC	88	1,1,1
Lib10^4 1 ng	ACACGTTATATT	ACACGATATATT,ACACGGTATATT	62	1,2
Lib10^4 1 ng	ACACTAATCCCA		75
Lib10^4 1 ng	ACACTACGAGCC	ACACTACGTGCC	75	1
Lib10^4 1 ng	ACACTAGGTCAT	ACACTAGGGCAT,ACACTANGTCAT,ACANTAGGTCAT	52	1,1,1
Lib10^4 1 ng	ACACTCTATCCT		98
Lib10^4 1 ng	ACACTGAATTTT	ACACTGAATTAT	55	1
Lib10^4 1 ng	ACACTTAAAGGA	ACACTTAAAGGG,ACACTTAGAGGA,ACACTTTAAGGA,ACTCTTAAAGGA	202	1,1,1,1
Lib10^4 1 ng	ACACTTATGCAC	ACACTNATGCAC,ACACTTATACAC	140	1,1
Lib10^4 1 ng	ACACTTCGGGTC	ACACTTCGAGTC,ACACTTCGGGCC,ACAGTTCGGGTC,CCACTTCGGGTC	214	2,1,1,1
Lib10^4 1 ng	ACACTTTTACGA	ACACTTTTACGC,ACACTTTTATGA,CCACTTTTACGA	203	3,1,1
Lib10^4 1 ng	ACAGACCGATGA	ACAGACCGATGG,ACAGACCGATGT,ACAGACCGGTGA,ACAGACCGTTGA,ACAGGCCGATGA,ACAGTCCGATGA,ACANACCGATGA,GCAGACCGATGA	192	2,1,1,1,1,1,1,1
Lib10^4 1 ng	ACAGACGGATTG	ACAGACCGATTG,ACAGACGGTTTG,ACAGATGGATTG,ACAGGCGGATTG,ACAGTCGGATTG,ACGGACGGATTG	218	1,3,1,2,7,1
Lib10^4 1 ng	ACAGACTATGAT	AAAGACTATGAT,ACACACTATGAT,ACAGACTATGGT,ACAGACTATGTT,ACAGGCTATGAT,ACAGTCTATGAT	189	1,1,1,1,1,2
Lib10^4 1 ng	ACAGCATTGATA	ACAGCATTGATC,ACAGCATTGTTA,ACAGCTTTGATA	96	1,1,1
Lib10^4 1 ng	ACAGGCGGGCAA	ACAGGCGGGTAA	59	1
Lib10^4 1 ng	ACAGGCTGGAGA	ACAGGCTGGAGT,ACAGGCTGGTGA,ACAGGGTGGAGA	148	1,2,1
Lib10^4 1 ng	ACAGGGCGAGCC	ACAGGGCGAGCG,ACAGGGCGAGGC,ACAGGGCGGGCC,ACAGGGCGNGCC,ACAGGGCGTGCC,ACAGGTCGAGCC,ACAGTGCGAGCC,ACGGGGCGAGCC	156	1,1,1,1,2,1,1,1
Lib10^4 1 ng	ACAGGGGTTAGC	ACAGGGATTAGC,ACAGGGGATAGC,ACAGGGGCTAGC,ACAGGTGTTAGC,ACANGGGTTAGC,ACTGGGGTTAGC,ATAGGGGTTAGC	233	1,1,1,2,1,1,1
Lib10^4 1 ng	ACAGGGTCTGTG	ACAGGGTCAGTG,ACAGGGTCTATG,ACAGGTTCTGTG	71	1,1,1
Lib10^4 1 ng	ACAGGGTTCTGG	ACAGCGTTCTGG,ACAGGGTNCTGG,ACAGGGTTCTGT	177	1,1,1
Lib10^4 1 ng	ACAGGTATACTT	AGAGGTATACTT	71	1
Lib10^4 1 ng	ACAGGTCCCTGC	ACAGCTCCCTGC,ACAGGTACCTGC,ACAGGTCCCTGG	72	1,1,1
Lib10^4 1 ng	ACAGGTGTAGTT	ACAGATGTAGTT,ACAGGTGAAGTT,ACAGGTGGAGTT	132	1,1,1
Lib10^4 1 ng	ACAGTGAGCCTT	ACAGTGAGCTTT,ACAGTGAGGCTT,ACAGTGGGCCTT,ACAGTGTGCCTT,CCAGTGAGCCTT	156	1,1,3,3,1
Lib10^4 1 ng	ACAGTGTTCTTT		85
Lib10^4 1 ng	ACAGTTCGTGTA	ACAGTTCGAGTA	91	1
Lib10^4 1 ng	ACAGTTTGGATG	ACAGGTTGGATG,ACAGTATGGATG,ACAGTTTGGATT,ACAGTTTGGGTG,ACAGTTTGGTTG	218	1,1,1,5,6
Lib10^4 1 ng	ACAGTTTTTCCT	ACAGTTTTTTCT	62	1
Lib10^4 1 ng	ACATACCTGTCA		97
Lib10^4 1 ng	ACATACGTTGGT	ACATACGTAGGT,ACATACGTTGCT	62	1,1
Lib10^4 1 ng	ACATAGATATAA	AAATAGATATAA	67	1
Lib10^4 1 ng	ACATAGCGGAAA	ACACAGCGGAAA,ACATAGCCGAAA,ACATAGCGGAAG,ACATAGCGGTAA	168	1,1,1,1
Lib10^4 1 ng	ACATAGGTTCTA		115
Lib10^4 1 ng	ACATATAGCCCT	ACACATAGCCCT,ACATAAAGCCCT,ACATAGAGCCCT,ACATATANCCCT	135	1,1,2,1
Lib10^4 1 ng	ACATATCTCTTC	ACATTTCTCTTC	127	1
Lib10^4 1 ng	ACATCCGTGGCC	ACANCCGTGGCC,ACATCCGGGGCC,ACATCCGTGGGC,ACCTCCGTGGCC,ACTTCCGTGGCC	153	1,3,1,1,1
Lib10^4 1 ng	ACATCCTCGCAG	ACATCCTCGCTG,AGATCCTCGCAG,CCATCCTCGCAG	93	1,1,1
Lib10^4 1 ng	ACATCCTGTCCT	ACATACTGTCCT,ACATCCTGACCT,ACATCCTNTCCT,ACCTCCTGTCCT,ATATCCTGTCCT	195	1,2,1,1,1
Lib10^4 1 ng	ACATCGCCCATA	ACATGGCCCATA	97	1
Lib10^4 1 ng	ACATCGCTTTTT	ACATCGCTATTT	88	1
Lib10^4 1 ng	ACATCGTCGGTA	ACATCGTCGGGA	102	1
Lib10^4 1 ng	ACATCTACAACT		78
Lib10^4 1 ng	ACATCTCATAAG		173
Lib10^4 1 ng	ACATCTGGACAC	ACATCTGGAGAC,ACATCTGGGCAC,ACATCTGGTCAC,ACATCTNGACAC,ACCTCTGGACAC	164	1,1,1,1,1
Lib10^4 1 ng	ACATCTGGTGCG	ACATCTGGAGCG,ACATCTGGTACG,ACTTCTGGTGCG	151	1,1,1
Lib10^4 1 ng	ACATGTCACGGC	ACATGCCACGGC,ACATGTCACGAC,ACATGTCNCGGC,AGATGTCACGGC	165	1,1,1,1
Lib10^4 1 ng	ACATGTTATTGT	ACAAGTTATTGT,ACATGGTATTGT,ACATGTTAATGT	117	1,1,1
Lib10^4 1 ng	ACATGTTCGTCA	ACANGTTCGTCA	103	1
Lib10^4 1 ng	ACATTAACCCGG	ACATTAANCCGG	165	1
Lib10^4 1 ng	ACATTATTAGGT		111
Lib10^4 1 ng	ACATTATTTTTC	AGATTATTTTTC	83	1
Lib10^4 1 ng	ACATTCGCGTCT	ACATTCGNGTCT	95	1
Lib10^4 1 ng	ACATTCTTAGTT		122
Lib10^4 1 ng	ACATTGCTTAAG	ACATNGCTTAAG,ACATTCCTTAAG,ACATTGCTTATG	200	1,1,2
Lib10^4 1 ng	ACATTGGTGACT	ACATAGGTGACT,ACATTGGGGACT,ACATTGGTGGCT,ACATTNGTGACT	126	2,1,1,1
Lib10^4 1 ng	ACATTTACCACA	ACATTAACCACA	133	1
Lib10^4 1 ng	ACATTTCCAATC	ACANTTCCAATC,ACATTTCCAATG,ACATTTNCAATC	100	1,1,1
Lib10^4 1 ng	ACATTTGCATGA	ACATTTGCATCA,ACATTTGCATGC,ACATTTGCATGG,ACATTTGCATGT,AGATTTGCATGA,CCATTTGCATGA	126	1,1,1,2,1,1
Lib10^4 1 ng	ACATTTTATGTA		151
Lib10^4 1 ng	ACCAATGTGTCT	ACCAATGNGTCT,ACCAATNTGTCT	162	1,1
Lib10^4 1 ng	ACCACCTGTAGT	ACCACCTGAAGT,ACCACCTGTTGT	99	1,2
Lib10^4 1 ng	ACCACGTCTGGT	ACAACGTCTGGT	86	1
Lib10^4 1 ng	ACCACTTTAACT		56
Lib10^4 1 ng	ACCACTTTTGGA	ACCACTTTTGTA	77	1
Lib10^4 1 ng	ACCAGTGGGCAT	ACCAGAGGGCAT,ACCAGNGGGCAT,ACCAGTGGGGAT,ACCAGTGGTCAT,ACCAGTGTGCAT	185	1,1,1,1,1
Lib10^4 1 ng	ACCATAATAGAA		113
Lib10^4 1 ng	ACCATCATCAGG		93
Lib10^4 1 ng	ACCATCGTGAGA	ACCATCGTGAGT,ACCATCGTGTGA	115	1,3
Lib10^4 1 ng	ACCATGGAAGGC	ACCATGGGAGGC,ACCATGGTAGGC,AGCATGGAAGGC	70	1,1,1
Lib10^4 1 ng	ACCATTATCCTA	ACCATTCTCCTA,ATCATTATCCTA,TCCATTATCCTA	117	1,1,1
Lib10^4 1 ng	ACCATTCTTGTT	ACCATTCATGTT,ACCATTCTTGAT	144	1,1
Lib10^4 1 ng	ACCATTGACGCA	ACCATTGATGCA,ACCATTGCCGCA,ACCATTGGCGCA,ACCATTGTCGCA,ACCATTNACGCA,ACTATTGACGCA,TCCATTGACGCA	147	1,2,1,1,1,1,1
Lib10^4 1 ng	ACCATTTTGCGT	AACATTTTGCGT,AGCATTTTGCGT	179	1,1
Lib10^4 1 ng	ACCATTTTGTAA	ACCAATTTGTAA	61	1
Lib10^4 1 ng	ACCCAAGCCTCA	ACCCAAGGCTCA,ACCCAAGTCTCA,ACCCATGCCTCA,ACCCTAGCCTCA	131	1,1,2,1
Lib10^4 1 ng	ACCCAATTTACT	AACCAATTTACT,ACCCACTTTACT	124	1,1
Lib10^4 1 ng	ACCCACCGGCTG	ACCCACCCGCTG,ACCCAGCGGCTG,ACCCTCCGGCTG,TCCCACCGGCTG	136	1,1,1,1
Lib10^4 1 ng	ACCCAGAGCCCG	ACCCAGAGCCGG,ACCCAGTGCCCG	64	1,2
Lib10^4 1 ng	ACCCCCAAGGTA	ACCCCCCAGGTA	107	1
Lib10^4 1 ng	ACCCCTTTTTCG	GCCCCTTTTTCG	102	1
Lib10^4 1 ng	ACCCGATTGAAT	ACCCAATTGAAT,ACCCGATTGCAT,ACCCGATTGTAT,ACCCGCTTGAAT	168	1,1,3,1
Lib10^4 1 ng	ACCCGGCTCGCT	ACCCGGCTCGCC	180	1
Lib10^4 1 ng	ACCCGGTTTCAG	ACCCGGGTTCAG,ACCCGGTATCAG,ACCCGGTTTCTG	148	1,1,1
Lib10^4 1 ng	ACCCTAAACGGC		98
Lib10^4 1 ng	ACCCTACCCTGG	ACACTACCCTGG,ACCCTACTCTGG,ACCCTTCCCTGG,ATCCTACCCTGG	109	1,1,1,1
Lib10^4 1 ng	ACCCTATTGTAA	ACCCTATTGGAA,ACCCTATTGTAT	179	1,1
Lib10^4 1 ng	ACCCTCCTAGTT	ACCNTCCTAGTT,TCCCTCCTAGTT	136	1,1
Lib10^4 1 ng	ACCCTCTATCAT		67
Lib10^4 1 ng	ACCCTGCCCGTC	ACCCTGCCCGTT,ACCCTGNCCGTC,AGCCTGCCCGTC,GCCCTGCCCGTC	161	1,1,1,1
Lib10^4 1 ng	ACCCTTATGTGT	ACCCTGATGTGT,ACCCTTATGAGT,ACCCTTATGGGT	147	1,1,1
Lib10^4 1 ng	ACCCTTCACGGT	ACCCTTCACGGA,ACCCTTCAGGGT,GCCCTTCACGGT,TCCCTTCACGGT	119	1,1,1,1
Lib10^4 1 ng	ACCCTTCGACTG	ACCCTCCGACTG,ACCCTTCGAATG,ACCCTTCGTCTG	113	1,1,4
Lib10^4 1 ng	ACCGAACTGTCG	ACCAAACTGTCG,ACCGAACTGCCG	96	1,1
Lib10^4 1 ng	ACCGAAGCCTCG	ACCGGAGCCTCG	137	5
Lib10^4 1 ng	ACCGAAGCGTAC	ACCGAAGCGTAG,ACCGATGCGTAC,ACCGTAGCGTAC	149	1,1,1
Lib10^4 1 ng	ACCGACAGAATC	ACCGACAGAATG,ACCGACAGACTC,ACCGACAGCATC,ACCGGCAGAATC,TCCGACAGAATC	164	1,1,1,1,1
Lib10^4 1 ng	ACCGCACCTGAC	ACCGCACCTGGC,ACCGCACCTGTC,ACCNCACCTGAC	192	1,1,1
Lib10^4 1 ng	ACCGCAGCTTCG	ACCCCAGCTTCG,ACCGCAGATTCG,ACCGCAGCTTCA,ACCGCNGCTTCG,ACCNCAGCTTCG	164	1,1,1,1,1
Lib10^4 1 ng	ACCGCTTTAAAT		69
Lib10^4 1 ng	ACCGGAACGAAC	ACCGGAAAGAAC,ACCGGAACGGAC,ACCGGAAGGAAC,ACCGGGACGAAC,AGCGGAACGAAC,ATCGGAACGAAC,TCCGGAACGAAC	161	1,3,1,1,1,1,1
Lib10^4 1 ng	ACCGGAATGTTT	AACGGAATGTTT,ACCGAAATGTTT,ACCGCAATGTTT,ACCGGAAAGTTT,ACCGGAATGATT,ACCGGAATGTAT,ACCGGAGTGTTT,ACCGGANTGTTT	141	1,2,1,1,1,1,2,1
Lib10^4 1 ng	ACCGGATGTCGA	ACCCGATGTCGA,ACCGAATGTCGA,ACCGCATGTCGA,ACCGGATGGCGA,ACCGGATGTCGG,ACCGGATGTCGT,ACCGGGTGTCGA,ACCGGTTGTCGA	167	1,1,2,2,1,1,1,1
Lib10^4 1 ng	ACCGGATTCATG	ACCGGCTTCATG	49	1
Lib10^4 1 ng	ACCGGCGCCACG	ACCGGCGCCACC	142	1
Lib10^4 1 ng	ACCGGGATAGTG	ACAGGGATAGTG,ACCGGGATACTG,ACCGGGATAGTA,ACCGTGATAGTG	186	152,2,1,1
Lib10^4 1 ng	ACCGGGCTATCT	ACCGGGCTATCC,ACCGGGTTATCT,TCCGGGCTATCT	178	109,1,1
Lib10^4 1 ng	ACCGGTACTATA	ACCGATACTATA,ACCGCTACTATA,ACCGGGACTATA,ACCGGNACTATA,ACCGGTACTAGA,ACCGGTACTTTA	164	1,1,3,1,1,1
Lib10^4 1 ng	ACCGGTTAGCAG	ACCGGGTAGCAG,ACCGGTTAGCCG,ACCGGTTAGCTG	187	1,1,1
Lib10^4 1 ng	ACCGTCATAGTT	ACCGCCATAGTT,ACCGTCATAGGT	104	1,1
Lib10^4 1 ng	ACCGTCCGGTCA		52
Lib10^4 1 ng	ACCGTGGGTCTG	ACCGAGGGTCTG,ACCGTGGATCTG,ACCGTGNGTCTG	146	1,1,1
Lib10^4 1 ng	ACCGTTAGGGGT	ACCGTTAGGGGA,ACCGTTAGGGGC,ACCGTTAGGGGG,ACCGTTAGGTGT	151	1,1,2,1
Lib10^4 1 ng	ACCGTTCTAGTC		128
Lib10^4 1 ng	ACCGTTCTTCTT	ACCGTCCTTCTT	116	2
Lib10^4 1 ng	ACCTAAGTTGTG	ACCTAACTTGTG,ACCTAAGATGTG,ACCTAAGGTGTG,ACCTAAGTTGGG,ACCTAGGTTGTG,TCCTAAGTTGTG	174	1,1,2,4,1,1
Lib10^4 1 ng	ACCTACCATTTG	ACCTACCACTTG	98	1
Lib10^4 1 ng	ACCTATCGGTGG	ACCTACCGGTGG,ACCTATCGGGGG,ACCTATCNGTGG,ATCTATCGGTGG	139	1,4,1,1
Lib10^4 1 ng	ACCTATTTCTCA		80
Lib10^4 1 ng	ACCTCCATGGTT	AACTCCATGGTT,ACCTCCATGTTT	156	1,1
Lib10^4 1 ng	ACCTCCCGTATT	ACCTCCCGTATA	122	1
Lib10^4 1 ng	ACCTCCGTTGGC	ACCTCCATTGGC,ACCTCCGTAGGC,ACCTGCGTTGGC,ANCTCCGTTGGC,ATCTCCGTTGGC	215	1,1,1,1,1
Lib10^4 1 ng	ACCTCGACGTGG	ACCTCGACGGGG,ACCTCGGCGTGG,ACCTCGTCGTGG	109	1,1,2
Lib10^4 1 ng	ACCTCGCATCGT	ACCTCACATCGT,ACCTCGCACCGT,ACCTCGCATCGA,ACCTCGCATCGG,ACCTGGCATCGT,ACCTTGCATCGT,ACGTCGCATCGT,AGCTCGCATCGT,ATCTCGCATCGT,TCCTCGCATCGT	303	1,1,1,1,1,1,1,1,1,1
Lib10^4 1 ng	ACCTCTAATCAC		119
Lib10^4 1 ng	ACCTCTGACGGA	ACCTCTGAAGGA,ACCTCTGACGGG,ACCTCTGGCGGA,ACCTCTGTCGGA,ACCTGTGACGGA	225	1,2,2,2,1
Lib10^4 1 ng	ACCTCTGGCCTT	ACCTCNGGCCTT,ACCTCTGTCCTT	131	1,1
Lib10^4 1 ng	ACCTCTGTTTCC	ACCGCTGTTTCC,ACCTCTGTTTGC	113	1,1
Lib10^4 1 ng	ACCTCTTTGTTC	ACCTCTATGTTC,ACCTCTTAGTTC	150	1,1
Lib10^4 1 ng	ACCTGAAGTAAT	ACCTGAACTAAT,ACGTGAAGTAAT	112	1,1
Lib10^4 1 ng	ACCTGAGGGTCA	ACCTGAGAGTCA,ACCTGGGGGTCA	123	1,1
Lib10^4 1 ng	ACCTGATAGCTC	ACCTAATAGCTC,ACCTGTTAGCTC	145	1,2
Lib10^4 1 ng	ACCTGATTCTCT	ACCCGATTCTCT,ACCTGATACTCT,ACCTGATTCACT,ACCTGGTTCTCT	109	1,1,1,2
Lib10^4 1 ng	ACCTGCAGAGTG	ACCTGCAGGGTG,ACCTGGAGAGTG	144	1,1
Lib10^4 1 ng	ACCTGCATCGCT	ACCTCCATCGCT,ACCTGCGTCGCT	100	1,1
Lib10^4 1 ng	ACCTGCTTATGA	ACCTGCTTACGA,GCCTGCTTATGA	157	1,1
Lib10^4 1 ng	ACCTGGGTCTCA	AACTGGGTCTCA,ACCTCGGTCTCA,ACCTGGGCCTCA,ACCTGGGTCTCT	122	1,1,1,1
Lib10^4 1 ng	ACCTGTGTACTT	ACCTGAGTACTT,ACCTGGGTACTT,ATCTGTGTACTT,TCCTGTGTACTT	177	2,1,1,1
Lib10^4 1 ng	ACCTGTTGGTGC	ACCNGTTGGTGC,ACCTGTTGGTGG	152	1,1
Lib10^4 1 ng	ACCTTAAAGCCA	ACCNTAAAGCCA,ACCTTGAAGCCA,ACCTTNAAGCCA,ACCTTTAAGCCA,ATCTTAAAGCCA,TCCTTAAAGCCA	116	1,1,1,1,2,1
Lib10^4 1 ng	ACCTTCCGGTGT	ACCCTCCGGTGT,ACCTTACGGTGT,ACCTTCCGGCGT,ACCTTCCGGGGT,ACCTTTCGGTGT	215	1,1,1,1,1
Lib10^4 1 ng	ACCTTCGTGCCT		65
Lib10^4 1 ng	ACCTTCTATGTT	ACCTTCTATGTG	111	1
Lib10^4 1 ng	ACCTTGCCGTAA	ACCATGCCGTAA,ACCTTGCCGAAA,AGCTTGCCGTAA	183	1,1,1
Lib10^4 1 ng	ACCTTGCTAGCG	ACCTTGCTTGCG,ATCTTGCTAGCG,TCCTTGCTAGCG	86	1,1,1
Lib10^4 1 ng	ACCTTGGTGAGT	ACCTTGGNGAGT,ACCTTGGTGTGT,TCCTTGGTGAGT	164	1,1,18
Lib10^4 1 ng	ACCTTGTGATCC	ACCATGTGATCC,ACCNTGTGATCC,ACCTTGGGATCC,ACCTTGTGTTCC,AGCTTGTGATCC	126	1,1,1,2,1
Lib10^4 1 ng	ACCTTGTTTATT	ACCTTGGTTATT	105	2
Lib10^4 1 ng	ACCTTTAAGCAC		150
Lib10^4 1 ng	ACCTTTCATGAG	ACCTTTCATGGG,ACCTTTCATGTG	146	5,6
Lib10^4 1 ng	ACCTTTCCTGGT	ACCTTTCGTGGT,ACCTTTGCTGGT	78	1,1
Lib10^4 1 ng	ACCTTTTAGGGA	ACCTTCTAGGGA,ACCTTTCAGGGA,ACCTTTTACGGA,ACCTTTTAGGCA,ACCTTTTAGGGG,ACTTTTTAGGGA,ATCTTTTAGGGA	150	1,1,1,1,1,1,1
Lib10^4 1 ng	ACCTTTTCGGGT	ACCCTTTCGGGT	146	1
Lib10^4 1 ng	ACGAACAGTTAC	ACGAACAGATAC,ACGAACAGTAAC,ACGAACANTTAC,ACGAAGAGTTAC,GCGAACAGTTAC	137	1,1,1,1,1
Lib10^4 1 ng	ACGAAGAGGCTA	ACGAAGCGGCTA,ACGAAGGGGCTA	125	1,1
Lib10^4 1 ng	ACGAAGCGGGGT	ACGAACCGGGGT,ACGAAGCCGGGT,ACGAAGCGGAGT,ACGAAGCGGCGT	150	1,1,1,1
Lib10^4 1 ng	ACGAAGCTGGCC	ACGAAGNTGGCC,ACGTAGCTGGCC	170	1,1
Lib10^4 1 ng	ACGAATTTGCTT	ACGAATTTGCTA	102	1
Lib10^4 1 ng	ACGACAGCCACC	ACGACAGCCCCC,ACGACAGCGACC,ACGCCAGCCACC,ACGGCAGCCACC,ACGTCAGCCACC	174	1,1,1,1,1
Lib10^4 1 ng	ACGACATATTAA		138
Lib10^4 1 ng	ACGACCGAAAGA	ACGACCGTAAGA,ACGACCTAAAGA,ACGACTGAAAGA,ACGTCCGAAAGA	126	1,1,1,2
Lib10^4 1 ng	ACGACGGGCTGT		84
Lib10^4 1 ng	ACGACGTTCCAT	ACGACGTNCCAT,ACGCCGTTCCAT,ACGTCGTTCCAT	127	1,1,1
Lib10^4 1 ng	ACGAGCGGTAAG	ACGAGCGGAAAG,ACGAGCGGTCAG,ACGAGTGGTAAG,ACGGGCGGTAAG,ACGTGCGGTAAG	142	3,1,1,1,2
Lib10^4 1 ng	ACGAGCTCTTTA	ACGAGCTCATTA,ACGAGCTGTTTA,ACGGGCTCTTTA	110	1,1,2
Lib10^4 1 ng	ACGAGGATCTAG	ACGAGGATCTTG,ACGAGGGTCTAG,ACGGGGATCTAG,ACGTGGATCTAG	152	2,1,2,1
Lib10^4 1 ng	ACGAGGGCAATA	ACGTGGGCAATA	60	1
Lib10^4 1 ng	ACGAGTCGTCAA	ACAAGTCGTCAA,ACGAGACGTCAA,ACGAGCCGTCAA,ACGAGGCGTCAA,ACGAGTCGACAA,ACGAGTCGGCAA,ACGAGTCGTAAA,ACGGGTCGTCAA,ACGTGTCGTCAA	164	1,2,1,1,1,1,1,1,1
Lib10^4 1 ng	ACGAGTCTGAGG	ACGAGACTGAGG,ACGAGTCNGAGG,ACGAGTCTGGGG,ACGAGTCTGTGG,ACGGGTCTGAGG,ACGTGTCTGAGG	167	1,1,9,4,2,2
Lib10^4 1 ng	ACGAGTGCTAGC	ACGAGTGCTACC,ACGGGTGCTAGC,ACGTGTGCTAGC	122	1,3,2
Lib10^4 1 ng	ACGATCCATTAC	ACCATCCATTAC,ACGACCCATTAC,ACGATCCATAAC,ACGGTCCATTAC,ACGTTCCATTAC,ATGATCCATTAC	103	1,1,1,3,2,1
Lib10^4 1 ng	ACGATGCACGTT	ACGATGAACGTT,ACGTTGCACGTT	89	1,1
Lib10^4 1 ng	ACGATGCTGTAA	ACGATGCTGGAA,ACGATGCTGTAG,ACGATGCTGTTA,ACGATGGTGTAA,ACGATGTTGTAA,ACGGTGCTGTAA	112	1,1,1,1,1,1
Lib10^4 1 ng	ACGATGTGTATT	ACGATGTGGATT	147	1
Lib10^4 1 ng	ACGATTACAATC	ACGATNACAATC,ACGATTACAATT,ACGNTTACAATC	118	1,1,1
Lib10^4 1 ng	ACGATTCTTTGC	ACGATTCTCTGC,ACGATTCTTAGC,ACGCTTCTTTGC,ACGGTTCTTTGC,ACGTTTCTTTGC	139	1,1,1,2,2
Lib10^4 1 ng	ACGATTGCTTGG	ACGATTGCATGG,ACGATTGCTTGA,ATGATTGCTTGG	70	1,1,1
Lib10^4 1 ng	ACGCAAGTCCAG	ACGCAAGTCCTG,ACGCAAGTTCAG,ACGCATGTCCAG,ACGTAAGTCCAG,AGGCAAGTCCAG	279	2,1,1,1,1
Lib10^4 1 ng	ACGCACTCAGCT	ACGCACTCAGTT,ACGCGCTCAGCT	48	1,1
Lib10^4 1 ng	ACGCAGTCTGGC	ACACAGTCTGGC,ACGCAGTCTGGG,ACGCANTCTGGC,ACGCTGTCTGGC	161	1,1,1,1
Lib10^4 1 ng	ACGCATCCCTTT	ACCCATCCCTTT,ACGCATCCCTTC	131	1,1
Lib10^4 1 ng	ACGCCCATTCTT	ACGCCCATACTT	72	1
Lib10^4 1 ng	ACGCCCTGGTGT	ACGCCCTAGTGT,ACGCCCTGGGGT	167	1,1
Lib10^4 1 ng	ACGCCCTGTTTC	ACGCCCTGGTTC,ACGCCCTGTTCC	82	1,1
Lib10^4 1 ng	ACGCCTGATGGT	ACGCCTGATGGG,ACGCCTGATGTT,ACGCCTGGTGGT	176	1,1,1
Lib10^4 1 ng	ACGCCTTACTAT	ACGCCTAACTAT,ACGCCTTACCAT,ACGCTTTACTAT	104	1,1,1
Lib10^4 1 ng	ACGCCTTCGGAT		108
Lib10^4 1 ng	ACGCGACTTTTA	ACGCGACTTATA,ACGCGACTTGTA,ACGCGATTTTTA,ACGCGGCTTTTA,ATGCGACTTTTA	183	1,1,1,1,1
Lib10^4 1 ng	ACGCGATGTTCG	ACGCCATGTTCG,ACGCGATGGTCG,ACGCGATGTACG,ACGTGATGTTCG	176	1,1,1,1
Lib10^4 1 ng	ACGCGCAGTTGT		70
Lib10^4 1 ng	ACGCGTCCTTTA	ACCCGTCCTTTA,ACGCATCCTTTA,ACGCGTCCTATA,ACGCTTCCTTTA,ACGGGTCCTTTA	166	147,1,1,1,1
Lib10^4 1 ng	ACGCGTGCCAAG	ACGCATGCCAAG,ACGCGTGCCATG	63	1,1
Lib10^4 1 ng	ACGCGTTAGTTA	ACGCGTTAGGTA,ACGGGTTAGTTA	101	1,1
Lib10^4 1 ng	ACGCTAGTTCAT	ACGCTAGCTCAT,ACGCTTGTTCAT,ACGGTAGTTCAT,ATGCTAGTTCAT	165	1,1,1,1
Lib10^4 1 ng	ACGCTATGACTG	ACACTATGACTG,ACGCTATGACCG,ACGCTATGCCTG,ACGCTATGGCTG	143	1,108,1,1
Lib10^4 1 ng	ACGCTCAGGTTC	ACGCTCACGTTC	167	1
Lib10^4 1 ng	ACGCTCCTTGGT		57
Lib10^4 1 ng	ACGCTCTCGCCT	AAGCTCTCGCCT,ACGCTCTCCCCT,ACGCTCTNGCCT	119	1,1,1
Lib10^4 1 ng	ACGCTGGATGAT	AAGCTGGATGAT,ACCCTGGATGAT,ACGCTGGATAAT,ACGCTGGATGGT,ACGCTGGATTAT,ACGGTGGATGAT	130	1,1,1,1,1,1
Lib10^4 1 ng	ACGCTGTTTCCA	ACCCTGTTTCCA,ACGCTGTNTCCA,ACGNTGTTTCCA,ATGCTGTTTCCA	122	1,1,1,1
Lib10^4 1 ng	ACGCTTTAAACT	ACGCTGTAAACT,ACGCTTTAATCT,ACGCTTTAGACT	195	1,1,1
Lib10^4 1 ng	ACGCTTTGTTAG	ACGCTTCGTTAG,ACGCTTTCTTAG,ACGGTTTGTTAG	153	1,1,1
Lib10^4 1 ng	ACGGAAGCAGTG	ACAGAAGCAGTG,ACGCAAGCAGTG,ACGGGAGCAGTG,ACGGTAGCAGTG	203	1,1,6,1
Lib10^4 1 ng	ACGGACACGTGT	ACGGACACGGGT,ACGGACANGTGT,ACGGTCACGTGT,ACGTACACGTGT,ACTGACACGTGT,ATGGACACGTGT	185	1,1,1,1,1,1
Lib10^4 1 ng	ACGGACCCGGAA	ACGGACCCGCAA,ACGGACCCGGGA,ACGGACCCGGTA,ACGGGCCCGGAA,ACGGTCCCGGAA	153	2,1,1,6,9
Lib10^4 1 ng	ACGGACTGTGTG	ACGGACTGTGGG,ACGGGCTGTGTG	107	2,1
Lib10^4 1 ng	ACGGAGCTATCG	ACGGACCTATCG,ACGGAGCNATCG,ACGGAGCTAGCG,ACGGAGCTATCT,ACGGGGCTATCG,ACGGTGCTATCG	154	1,1,1,1,2,2
Lib10^4 1 ng	ACGGATACTTAG	ACGGATACTAAG,ACGGATACTTTG,ACGGCTACTTAG,GCGGATACTTAG,TCGGATACTTAG	183	1,6,2,1,1
Lib10^4 1 ng	ACGGATGTTCGA	ACGGATATTCGA,ACGGGTGTTCGA	141	1,1
Lib10^4 1 ng	ACGGATTAGTCT	AAGGATTAGTCT,ACGGAGTAGTCT,ACGGATTAGACT	107	1,1,1
Lib10^4 1 ng	ACGGCCCGTACT	ACGGCCCGCACT,ACGGCCCGGACT	164	1,1
Lib10^4 1 ng	ACGGCCGTTGGT	ACGGCCGGTGGT,ACGGCCGTTCGT	53	1,1
Lib10^4 1 ng	ACGGCCTTGAAG	ACGGCCTTGAGG,ACGGCCTTGATG,ACGGCCTTGGAG,ACGGCCTTGTAG,ACGGCTTTGAAG	190	2,3,7,5,1
Lib10^4 1 ng	ACGGCTATATCT		63
Lib10^4 1 ng	ACGGCTCTTATG	ACGGCCCTTATG	147	1
Lib10^4 1 ng	ACGGCTCTTTTA	ACGGCTCGTTTA	68	1
Lib10^4 1 ng	ACGGCTTATCCC	AAGGCTTATCCC,ACGGCTTAACCC,ACGGCTTATCCT,ACGGGTTATCCC	110	1,1,1,1
Lib10^4 1 ng	ACGGGAAATTAT	ACGGCAAATTAT,ACGGGAAATAAT,ACGGGACATTAT,ACGGGGAATTAT,ACGNGAAATTAT	162	1,1,1,1,1
Lib10^4 1 ng	ACGGGAACAACT	ACGGGAANAACT,ACGGGGACAACT,ATGGGAACAACT	138	1,3,1
Lib10^4 1 ng	ACGGGAACTCGT	ACGGGAACTCGG,ACGGGAACTTGT,ACGGGACCTCGT,ACGGGNACTCGT,ACGGGTACTCGT	128	1,1,1,1,1
Lib10^4 1 ng	ACGGGACGTTCG	ACGAGACGTTCG,ACGGGACGATCG,ACGGGACGTCCG,ACGGGACGTGCG,ACGGGTCGTTCG	199	1,1,1,2,1
Lib10^4 1 ng	ACGGGAGTCTTA	ACGGGAGTATTA,ACGGGAGTCCTA,ACGGGGGTCTTA,ACGGGTGTCTTA	225	1,1,2,2
Lib10^4 1 ng	ACGGGAGTGGAC	ACGCGAGTGGAC,ATGGGAGTGGAC,TCGGGAGTGGAC	142	1,1,1
Lib10^4 1 ng	ACGGGATGCCGC	ACGGGATGCCTC,ACGGGATGTCGC,ACGGGGTGCCGC,ACGGGNTGCCGC,ACGGGTTGCCGC	174	1,1,2,1,1
Lib10^4 1 ng	ACGGGATGTTCC	ACGGGTTGTTCC,ACGNGATGTTCC,ATGGGATGTTCC	169	1,1,1
Lib10^4 1 ng	ACGGGGCCCATT	ACGGGCCCCATT,ACGGGNCCCATT,ACGGTGCCCATT	151	1,1,1
Lib10^4 1 ng	ACGGGGCTTGCC	ACGGGGCTTGCT,ACGGGGTTTGCC,ACGGGTCTTGCC	216	1,1,1
Lib10^4 1 ng	ACGGGGTGTAGC	ACGGGNTGTAGC	149	1
Lib10^4 1 ng	ACGGGGTTGTAA	ACGGGGTNGTAA,AGGGGGTTGTAA	126	1,1
Lib10^4 1 ng	ACGGGTCAGCAC	ACGGGACAGCAC	128	1
Lib10^4 1 ng	ACGGGTCCGTAA	ACAGGTCCGTAA,ACGCGTCCGTAA,ACGGGACCGTAA,ACGGGCCCGTAA,ACGGGTCCGAAA,ACGGGTCCGCAA,ACGGGTCCGGAA,ACGGGTCCGTAC,ACGGGTCGGTAA,ACGTGTCCGTAA,CCGGGTCCGTAA	210	1,1,1,1,1,1,1,1,1,1,1
Lib10^4 1 ng	ACGGGTGCTCAT	ACGCGTGCTCAT,ACGGGAGCTCAT,ACGGGCGCTCAT,ACGGGGGCTCAT,ACGGGNGCTCAT,ACGGGTGNTCAT,ATGGGTGCTCAT	153	1,1,2,2,1,1,1
Lib10^4 1 ng	ACGGGTGGTGAT	ACGGGCGGTGAT,ACGGGGGGTGAT,ACGGGTGGGGAT,ACGGGTGGTGTT	95	1,1,1,2
Lib10^4 1 ng	ACGGGTTTCGTA	ACCGGTTTCGTA,ACGGGATTCGTA	74	1,1
Lib10^4 1 ng	ACGGTACCCAAT	ACGGTACTCAAT,ACGGTNCCCAAT	124	1,1
Lib10^4 1 ng	ACGGTACTTCAA	ACGGAACTTCAA,ACGGGACTTCAA,ACGGTAGTTCAA,AGGGTACTTCAA	167	2,2,1,1
Lib10^4 1 ng	ACGGTCACTCTT	ACGGTCACTCTA,ATGGTCACTCTT,CCGGTCACTCTT	115	1,1,1
Lib10^4 1 ng	ACGGTCCTTGCT	ACGGGCCTTGCT,ACGGTACTTGCT,ACGGTCCNTGCT,ACGGTCCTAGCT,ATGGTCCTTGCT,TCGGTCCTTGCT	163	1,1,1,1,1,1
Lib10^4 1 ng	ACGGTGTCTTGG	ACGGTGTCATGG	148	1
Lib10^4 1 ng	ACGGTGTTCTTC	ACGGAGTTCTTC,ACGGTGGTCTTC,ACGGTGTTTTTC	212	1,1,1
Lib10^4 1 ng	ACGGTTCTGGTT	ACGGTTCTGGTC	150	1
Lib10^4 1 ng	ACGGTTGGCCTG	ACGGCTGGCCTG,ACGGTTGGGCTG,ATGGTTGGCCTG	163	1,2,1
Lib10^4 1 ng	ACGGTTGTTGTT	ACGGTCGTTGTT	83	1
Lib10^4 1 ng	ACGGTTTCGGTT	ACGGGTTCGGTT,ACGGTTTCGGGT,ACGGTTTCGTTT	167	1,1,1
Lib10^4 1 ng	ACGGTTTTGTGC	ACGATTTTGTGC,ACGGTTTTGTTC,AGGGTTTTGTGC	193	1,1,1
Lib10^4 1 ng	ACGTAAAGAGTT	ACGTAAAAAGTT,ACGTAAAGAGGT	82	1,1
Lib10^4 1 ng	ACGTACCGTTGG	ACGTACCGTAGG,ACGTACCGTGGG,ACGTACCGTTCG,ACGTACCGTTTG,CCGTACCGTTGG	184	2,1,1,1,1
Lib10^4 1 ng	ACGTACGCTGTA	ACCTACGCTGTA,ACGTACGCTATA,GCGTACGCTGTA	172	1,1,1
Lib10^4 1 ng	ACGTACGCTTTC	ACGGACGCTTTC	86	1
Lib10^4 1 ng	ACGTACTTGTAT	AAGTACTTGTAT,ACGTACATGTAT,ACGTACTTGAAT	107	1,1,3
Lib10^4 1 ng	ACGTAGGCGTCA	ACGAAGGCGTCA,ACGTAGNCGTCA,ACGTGGGCGTCA	124	4,1,1
Lib10^4 1 ng	ACGTAGTATTCG	ACGTAGNATTCG,ACGTAGTATCCG	172	1,1
Lib10^4 1 ng	ACGTAGTTGGTC	ACGAAGTTGGTC,ACGTAATTGGTC,ACGTAGTTGGGC,ACGTANTTGGTC,AGGTAGTTGGTC	140	1,1,1,1,1
Lib10^4 1 ng	ACGTATCCTGGG	ACGAATCCTGGG,ACGTATCCTAGG,ACGTATCCTCGG,ACGTATCCTGGC,ACGTCTCCTGGG,ACGTGTCCTGGG,ACGTTTCCTGGG	253	2,1,1,1,2,1,1
Lib10^4 1 ng	ACGTATGCTCTG	ACGTATGCTATG,ACGTATGNTCTG	116	1,1
Lib10^4 1 ng	ACGTATGGGGGC	ACGGATGGGGGC,ACGTATGAGGGC,ACGTATGGGCGC,ACGTATGGTGGC,AGGTATGGGGGC	149	1,1,1,1,1
Lib10^4 1 ng	ACGTATTATAAT	ACGTACTATAAT	58	1
Lib10^4 1 ng	ACGTCGAAGTCT	ACGACGAAGTCT,ACGCCGAAGTCT,ACGTCGAAGCCT,ACGTCGAGGTCT,ACGTCGTAGTCT	145	1,1,1,1,1
Lib10^4 1 ng	ACGTCGGAATAC	ACGTCGCAATAC,ACGTCGGGATAC,ACGTCGTAATAC	115	2,1,1
Lib10^4 1 ng	ACGTGACCTGCG	ACGAGACCTGCG,ACGGGACCTGCG,ACGTGACCTGCA,ACGTGGCCTGCG,ACGTGTCCTGCG,ACGTTACCTGCG	196	1,1,1,5,2,1
Lib10^4 1 ng	ACGTGCATACGC	ACGAGCATACGC,ACGGGCATACGC,ACGTGCATACAC,ACGTGCATACTC,ACGTGCNTACGC	195	1,1,1,1,1
Lib10^4 1 ng	ACGTGCCGTGTA	ACGAGCCGTGTA,ACGTCCCGTGTA,ACGTGCCGAGTA,ACGTGCCGTCTA,ACGTGGCGTGTA,TCGTGCCGTGTA	160	1,1,1,1,2,1
Lib10^4 1 ng	ACGTGGTGGTGC	ACGAGGTGGTGC,ACGTGATGGTGC	102	2,1
Lib10^4 1 ng	ACGTGGTTGCTG	ACGGGGTTGCTG,ACGTGGTAGCTG	171	1,1
Lib10^4 1 ng	ACGTGTAGCTAA	ACGTGAAGCTAA,ACGTGGAGCTAA,ACGTGTAGCAAA,ACGTGTAGTTAA	148	1,1,1,1
Lib10^4 1 ng	ACGTGTAGTGAT	ACGTGAAGTGAT,ACGTGTATTGAT	95	1,1
Lib10^4 1 ng	ACGTGTCCTAGA	ACGAGTCCTAGA,ACGTGACCTAGA,ACGTGNCCTAGA,ACGTGTCCTAAA,ACGTGTCCTAGG,ACGTGTCCTAGT	230	1,1,1,1,2,2
Lib10^4 1 ng	ACGTGTGCCCTA	ACGTGAGCCCTA,ACGTGGGCCCTA,ACGTGTGCCCTT,ACTTGTGCCCTA,AGGTGTGCCCTA	135	1,1,1,1,1
Lib10^4 1 ng	ACGTGTGGTTTA	ACGAGTGGTTTA,ACGTGCGGTTTA,ACGTGGGGTTTA,ACGTGTGCTTTA,ACGTGTGGTATA,ACGTGTGGTGTA,ACGTGTGTTTTA	187	1,1,1,1,3,1,1
Lib10^4 1 ng	ACGTGTTCCCCT	AAGTGTTCCCCT,ACGGGTTCCCCT,ACGTGATCCCCT,ACGTGTTCCGCT	105	1,1,2,1
Lib10^4 1 ng	ACGTGTTGATTG	ACGTGGTGATTG,ACGTGTNGATTG,ACGTGTTGTTTG,AGGTGTTGATTG	186	1,1,1,149
Lib10^4 1 ng	ACGTGTTGGAAT	ACGGGTTGGAAT,ACGTCTTGGAAT,ACGTGGTGGAAT,ACGTGNTGGAAT	190	1,1,2,1
Lib10^4 1 ng	ACGTTAAATAGT	AAGTTAAATAGT,ACGTGAAATAGT	48	1,1
Lib10^4 1 ng	ACGTTAACCCTT	ACGATAACCCTT,ACGCTAACCCTT,ACGTAAACCCTT,ACGTGAACCCTT	165	2,1,1,1
Lib10^4 1 ng	ACGTTCAAATTT	AAGTTCAAATTT	127	2
Lib10^4 1 ng	ACGTTCAATATC	ACGTGCAATATC,ACGTTCAATATG	90	1,1
Lib10^4 1 ng	ACGTTCAGGAAG	ACGGTCAGGAAG,ACGTTCAGCAAG,ACGTTCAGGAGG,ACGTTCAGGATG,ACGTTCAGGTAG,ACGTTCGGGAAG	112	3,3,1,1,1,1
Lib10^4 1 ng	ACGTTCTTTCCA	ACGGTCTTTCCA	238	2
Lib10^4 1 ng	ACGTTGAGGAGC	ACGATGAGGAGC,ACGCTGAGGAGC,ACGTTGAGGGGC,ACGTTGAGGTGC,ACGTTGGGGAGC,ACGTTGNGGAGC,ACGTTGTGGAGC	147	1,1,2,2,1,1,2
Lib10^4 1 ng	ACGTTTCCTAAG	ACGTTGCCTAAG,ACGTTTCCTATG	69	1,1
Lib10^4 1 ng	ACGTTTCCTACT	ACGATTCCTACT,ACGTTGCCTACT,ACGTTTACTACT,ACGTTTCNTACT,AGGTTTCCTACT	163	3,1,1,1,1
Lib10^4 1 ng	ACGTTTCTGGTA		98
Lib10^4 1 ng	ACGTTTTGCTGG	ACGTCTTGCTGG,ACGTTTTGCTCG	120	1,1
Lib10^4 1 ng	ACGTTTTGTCTT	ACGTGTTGTCTT	178	1
Lib10^4 1 ng	ACTAAAGTCAGG	ACTAAAGACAGG,ACTAAAGTCAGT,ACTAGAGTCAGG,ATTAAAGTCAGG	248	1,2,1,1
Lib10^4 1 ng	ACTAACTGCCGC	ACTAACTGCCGT,ACTNACTGCCGC	97	1,1
Lib10^4 1 ng	ACTAAGACAGTA	ACTAAGACAATA,ACTAAGNCAGTA,ACTAAGTCAGTA	49	1,1,2
Lib10^4 1 ng	ACTAAGGGGGTA	ACTAAGGGGGAA,ACTAAGGGGGGA,ACTAANGGGGTA	144	1,1,1
Lib10^4 1 ng	ACTAAGGTGCCC	ACTAAGCTGCCC,ACTAAGGAGCCC,AGTAAGGTGCCC	145	1,1,1
Lib10^4 1 ng	ACTAATGATTGA	ACTAAAGATTGA,ACTAATCATTGA,ACTAATGATTCA,ACTAATGATTGC,ACTAATGATTGG,ACTAATGATTGT,ACTAATGNTTGA,ACTAATGTTTGA	108	1,1,1,1,1,1,1,1
Lib10^4 1 ng	ACTACATTTGAA	AATACATTTGAA,ACTACATTTGAC,ACTACATTTGGA	117	1,1,1
Lib10^4 1 ng	ACTACCCTCGGT	TCTACCCTCGGT	58	1
Lib10^4 1 ng	ACTACGAAGCAA	ACTACGATGCAA,ACTACGCAGCAA	201	1,1
Lib10^4 1 ng	ACTACTATTCTG	ACTACTATTCTC	63	1
Lib10^4 1 ng	ACTAGAACTAAC	ACTACAACTAAC,ACTAGAACAAAC,ACTAGTACTAAC,ACTGGAACTAAC,AGTAGAACTAAC,TCTAGAACTAAC	166	1,1,1,1,1,1
Lib10^4 1 ng	ACTAGATTTTGT	AATAGATTTTGT,ACTACATTTTGT,ACTAGATTATGT,ACTNGATTTTGT	137	1,1,1,1
Lib10^4 1 ng	ACTAGCACACTC	ACTAGCACACCC,ACTAGCACTCTC,ACTGGCACACTC	214	1,1,1
Lib10^4 1 ng	ACTAGGCTCGCC		101
Lib10^4 1 ng	ACTAGGGGCGAA	ACTACGGGCGAA,ACTAGGGGCGTA,ACTAGGTGCGAA,ACTAGNGGCGAA	167	1,1,1,1
Lib10^4 1 ng	ACTAGGTTTCCT	ACTAGGGTTCCT,ACTAGGTTACCT,ACTAGGTTTCGT	133	1,1,1
Lib10^4 1 ng	ACTAGTAAAGTA	ACCAGTAAAGTA,ACTACTAAAGTA,ACTAGCAAAGTA,ACTAGNAAAGTA,ACTAGTAAAGTC,ACTAGTTAAGTA	178	1,1,1,2,1,1
Lib10^4 1 ng	ACTAGTAAGGTG	ACTAGCAAGGTG	74	1
Lib10^4 1 ng	ACTAGTACTTAT	ACTAGTGCTTAT	94	1
Lib10^4 1 ng	ACTAGTGCCAGT	ACAAGTGCCAGT,ACTAGTGCCAGG,ACTAGTGNCAGT,AGTAGTGCCAGT	110	1,1,1,1
Lib10^4 1 ng	ACTAGTTCGGAG	ACTAGTACGGAG,ACTAGTTCGGGG,ACTAGTTCGGTG,ACTAGTTCGNAG,ACTAGTTNGGAG	122	1,8,4,1,1
Lib10^4 1 ng	ACTATAGCGCAT	ACTATAGCGCAC,ACTATAGCGCCT	103	1,1
Lib10^4 1 ng	ACTATATTCCTT	ACTAAATTCCTT,ACTATNTTCCTT,ACTATTTTCCTT,GCTATATTCCTT	149	1,1,1,61
Lib10^4 1 ng	ACTATCGTCCAT		83
Lib10^4 1 ng	ACTATGTGTTTT	ACTATGGGTTTT,ACTATGTGGTTT	179	1,1
Lib10^4 1 ng	ACTATGTTCCTG	ACTATGTTCGTG	143	1
Lib10^4 1 ng	ACTATTCACCGT	ACTACTCACCGT,ACTATTNACCGT	113	1,1
Lib10^4 1 ng	ACTATTTGCAAG	ACTATATGCAAG,ACTATCTGCAAG,ACTATGTGCAAG,ACTATTTGCAAC,ACTATTTGCACG,ACTATTTGCTAG,ACTATTTGTAAG,ACTATTTNCAAG	189	2,1,1,1,2,2,1,1
Lib10^4 1 ng	ACTCACATTGGT	ACCCACATTGGT	112	1
Lib10^4 1 ng	ACTCACGCGATG	ACTCACGCGGTG,ACTGACGCGATG	189	1,1
Lib10^4 1 ng	ACTCAGCCGTTA	ACTCAGCCGATA,ACTCAGCCGCTA,ACTCAGCCGGTA,ACTCAGCCGTGA,ACTCANCCGTTA	110	1,1,2,1,1
Lib10^4 1 ng	ACTCATATGGCT	ACTCATATGTCT,ACTGATATGGCT	105	2,1
Lib10^4 1 ng	ACTCATGGGAGA	ACTCATGGGAGT,ACTCATGGTAGA	74	2,1
Lib10^4 1 ng	ACTCCAGGGTAC	ACTCCNGGGTAC	127	1
Lib10^4 1 ng	ACTCCATAGGTA	ACTCCATAAGTA,ACTCCATAGGAA,ACTCCTTAGGTA	176	1,2,1
Lib10^4 1 ng	ACTCCATTTGCT	ACTGCATTTGCT	89	1
Lib10^4 1 ng	ACTCCCTTTACT		108
Lib10^4 1 ng	ACTCCGCTTCGT	ACTCCACTTCGT,ACTCCGCGTCGT,ACTGCGCTTCGT	100	1,1,1
Lib10^4 1 ng	ACTCCGTATGAG	ACTCCGTATGGG,ACTCCGTATGTG,GCTCCGTATGAG	167	3,5,1
Lib10^4 1 ng	ACTCCTGGGGCG	ACTCCTGGGCCG,ACTCCTGNGGCG,ACTGCTGGGGCG	147	1,1,1
Lib10^4 1 ng	ACTCCTGGTTTT	ACTCCAGGTTTT,ACTCCTGGGTTT	158	2,1
Lib10^4 1 ng	ACTCGATATACA	ACTCGACATACA	55	1
Lib10^4 1 ng	ACTCGCGAGTAT	ACTCGCGAGAAT,ACTCGCGATTAT,ACTCGCGGGTAT,ACTCGCTAGTAT,TCTCGCGAGTAT	139	1,109,1,1,1
Lib10^4 1 ng	ACTCGCTAAATT	ACTCGCTAAATA,ACTCGGTAAATT,ACTCTCTAAATT,ACTTGCTAAATT,CCTCGCTAAATT	74	1,1,1,1,1
Lib10^4 1 ng	ACTCGGCCACTT		103
Lib10^4 1 ng	ACTCGGCGTATT	ACACGGCGTATT,ACTAGGCGTATT,ACTCGGCGCATT,ACTCGGCGGATT,ACTCGGCNTATT,ACTCGGNGTATT,ACTCTGCGTATT,GCTCGGCGTATT	264	1,1,1,1,1,2,2,1
Lib10^4 1 ng	ACTCGGGGAGAG	ACTCAGGGAGAG,ACTCGGGGAGCG,ACTCGGGGAGGG,ACTCGGGGAGTG,ACTCGTGGAGAG	156	1,2,6,3,1
Lib10^4 1 ng	ACTCGGGGGTGT	ACCCGGGGGTGT,ACTCGTGGGTGT,ACTGGGGGGTGT	147	1,1,1
Lib10^4 1 ng	ACTCGGGGTGGC	ACTCAGGGTGGC,ACTCGGCGTGGC,ACTCGGGGTAGC,ACTCGGGGTGGA	174	1,1,1,1
Lib10^4 1 ng	ACTCGGTAATGC	ACTCGGTAACGC,ACTCTGTAATGC	84	1,1
Lib10^4 1 ng	ACTCGTACCTCG	ACTCGAACCTCG,ACTCGGACCTCG	157	1,1
Lib10^4 1 ng	ACTCGTATTTCC		126
Lib10^4 1 ng	ACTCGTGTGTCA	ACTCGAGTGTCA,ACTCGTGAGTCA,ACTCGTGTGACA,ACTCGTGTGCCA	142	1,1,1,1
Lib10^4 1 ng	ACTCGTTAAAGG	ACTCGGTAAAGG,ACTCGTGAAAGG,ACTCGTTAAAGA,ACTCGTTAAAGT,ACTCGTTAATGG,ACTCGTTATAGG	219	1,1,1,1,2,1
Lib10^4 1 ng	ACTCGTTCTTCC	ACTCGATCTTCC,ACTCGTTCTACC,ACTCGTTCTTTC	166	1,1,1
Lib10^4 1 ng	ACTCGTTGATCG	ACTCGATGATCG,ACTCGTTGGTCG,ACTCGTTGTTCG,ACTCGTTNATCG,ACTGGTTGATCG,GCTCGTTGATCG	108	1,1,1,1,1,2
Lib10^4 1 ng	ACTCGTTGTACT	ACTCGATGTACT	96	1
Lib10^4 1 ng	ACTCTACCCTTG	ACTCTAACCTTG,ACTCTACCCTTA,ACTCTACCCTTC,ACTCTANCCTTG,ACTTTACCCTTG	129	1,1,1,1,1
Lib10^4 1 ng	ACTCTAGGTTCT	ACTCTAAGTTCT,ACTCTAGGGTCT,ACTCTATGTTCT	164	1,1,1
Lib10^4 1 ng	ACTCTAGTGCTT	AATCTAGTGCTT,ACTCTAGAGCTT,ACTCTAGTGTTT,ACTCTTGTGCTT,ACTNTAGTGCTT	161	1,1,1,2,1
Lib10^4 1 ng	ACTCTCTCTGAG	ACTCTCNCTGAG,ACTCTCTCTGGG,ACTCTCTCTGTG	144	1,13,9
Lib10^4 1 ng	ACTCTGTTGAGA	ACTCTGGTGAGA,ACTCTGNTGAGA,ACTCTGTTGAGG,ACTCTGTTGAGT,ACTCTGTTGGGA,ACTCTGTTGTGA	161	2,1,4,2,2,4
Lib10^4 1 ng	ACTCTTACCCCT		91
Lib10^4 1 ng	ACTCTTATCGCG	ACTCTTTTCGCG	62	1
Lib10^4 1 ng	ACTCTTCCTACT	TCTCTTCCTACT	114	1
Lib10^4 1 ng	ACTCTTGGTAGT	ACTCTTGTTAGT	47	1
Lib10^4 1 ng	ACTCTTGTTTCT	ACTCTTGNTTCT	106	1
Lib10^4 1 ng	ACTCTTTCTTTT	ACTCTTTCTTTA	67	1
Lib10^4 1 ng	ACTCTTTGAGCT	ACTCTTTGACCT,ACTCTTTGCGCT,ACTCTTTGGGCT,ACTCTTTGTGCT	243	1,2,8,6
Lib10^4 1 ng	ACTCTTTGGTCA	ACTCTNTGGTCA,ACTCTTNGGTCA,ACTCTTTGGACA	144	1,1,1
Lib10^4 1 ng	ACTCTTTTTAGC	ACTCTTTGTAGC,TCTCTTTTTAGC	108	1,1
Lib10^4 1 ng	ACTGAAAGACGA	ACTGAAAGACGG,ACTGAAAGCCGA,ACTGAAAGGCGA,ACTGAAAGTCGA,ACTGTAAGACGA,AGTGAAAGACGA	145	1,1,1,1,2,1
Lib10^4 1 ng	ACTGAAAGCGGC	ACTGAAAGCGGG,ACTGANAGCGGC,ACTGGAAGCGGC	141	1,1,1
Lib10^4 1 ng	ACTGAAGGCGTT	ACTCAAGGCGTT,ACTGAAGCCGTT,ACTGAAGGCGAT,ACTGAAGGCGTG,ACTGAAGTCGTT,ACTGGAGGCGTT,ACTGTAGGCGTT	132	1,1,1,2,1,1,1
Lib10^4 1 ng	ACTGACCTGTTT	ACTGACCTGGTT,ACTGACGTGTTT,ACTGACTTGTTT,ACTGGCCTGTTT,ACTGTCCTGTTT	190	1,1,2,2,4
Lib10^4 1 ng	ACTGACTCGGCT	ACTGTCTCGGCT	85	2
Lib10^4 1 ng	ACTGACTGTTTT	ACTGACTGATTT,ACTGACTGTATT,ACTGACTGTTTA,ACTGACTNTTTT,ACTGGCTGTTTT,ACTGTCTGTTTT	169	2,1,1,1,2,3
Lib10^4 1 ng	ACTGAGCCCATC	ACTGAGCCCAAC,ACTGGGCCCATC,ACTGTGCCCATC,TCTGAGCCCATC	95	1,5,2,1
Lib10^4 1 ng	ACTGAGGGATAC	ACTGAGGGATAA,ACTGAGGGTTAC,ACTGGGGGATAC,ACTGTGGGATAC,ACTNAGGGATAC,TCTGAGGGATAC	153	1,1,4,6,1,1
Lib10^4 1 ng	ACTGAGTCGGGT	ACTGAGCCGGGT,ACTGAGTCAGGT,ACTGAGTCGGAT,ACTGAGTCGGGA,ACTGGGTCGGGT	73	1,1,1,1,2
Lib10^4 1 ng	ACTGATAAAATG	ACTGCTAAAATG,ACTGGTAAAATG,ACTGTTAAAATG	161	1,2,1
Lib10^4 1 ng	ACTGCAAGATCA	ACTGCAGGATCA	116	1
Lib10^4 1 ng	ACTGCCAGAATC	AATGCCAGAATC,ACAGCCAGAATC	135	1,1
Lib10^4 1 ng	ACTGCCTGAAAT	ACTGCTTGAAAT	105	1
Lib10^4 1 ng	ACTGCCTTCACG	ACTGCCTGCACG,ACTGCCTTCTCG,ACTGTCTTCACG	179	1,1,1
Lib10^4 1 ng	ACTGCGATTTAT	ACTGCTATTTAT	153	1
Lib10^4 1 ng	ACTGCGTCTATG	ACTGCCTCTATG,ACTGCGACTATG	140	1,1
Lib10^4 1 ng	ACTGCGTTCTCT		136
Lib10^4 1 ng	ACTGCTATTGTA		165
Lib10^4 1 ng	ACTGCTCCCAAG	ACTGCACCCAAG,ACTGCCCCCAAG,ACTGCTCCCACG,ACTGCTCCCAGG,ACTGCTCCCATG,ACTGCTCCCCAG,ACTGCTCCCTAG	198	1,1,1,3,1,1,1
Lib10^4 1 ng	ACTGCTCCCGTC	ACTGCTCCCCTC,ACTGCTTCCGTC,TCTGCTCCCGTC	109	1,1,1
Lib10^4 1 ng	ACTGCTGACGTT	AATGCTGACGTT,ACTGCTGGCGTT	54	1,1
Lib10^4 1 ng	ACTGGAGGCCTG	ACTGGAGGCCTT,ACTGGGGGCCTG,ACTGGTGGCCTG	114	1,4,3
Lib10^4 1 ng	ACTGGCGGTTCA	ACTGACGGTTCA,ACTGGCAGTTCA,ACTGGCGCTTCA,ACTGGCGGATCA,ACTGGCGGCTCA,ACTGGCGGGTCA,ACTGGCGGTTCT,ACTGGCGGTTTA,ACTGGNGGTTCA,TCTGGCGGTTCA	319	1,1,1,15,8,18,1,1,2,1
Lib10^4 1 ng	ACTGGGATTGTT	ACTGGGGTTGTT	76	1
Lib10^4 1 ng	ACTGGGGATATA		56
Lib10^4 1 ng	ACTGGGGCTAAG	ACTGAGGCTAAG,ACTGGGGCTAGG,ACTGGGGCTATG	148	1,1,1
Lib10^4 1 ng	ACTGGGGGGTCG	ACTGGGGGGACG,ACTGGTGGGTCG	50	1,1
Lib10^4 1 ng	ACTGGGTAGTAT		102
Lib10^4 1 ng	ACTGGTAGTGCC	ACTGGAAGTGCC	101	1
Lib10^4 1 ng	ACTGGTATTAGG	ACAGGTATTAGG,ACTGGGATTAGG,ACTGGNATTAGG,ACTGGTACTAGG,ACTGGTATAAGG,AGTGGTATTAGG,ATTGGTATTAGG	301	1,1,2,2,1,1,1
Lib10^4 1 ng	ACTGGTATTTGC	ACGGGTATTTGC,ACTGGTATGTGC,ACTGGTTTTTGC,AGTGGTATTTGC	88	1,1,1,1
Lib10^4 1 ng	ACTGGTGAGGAT	ACTGGTGACGAT,ACTGGTGAGGAC,ACTGGTGAGGGT,ACTGGTGGGGAT,ACTGGTGTGGAT,TCTGGTGAGGAT	280	1,1,1,1,2,1
Lib10^4 1 ng	ACTGGTTCCTAT	ACTGCTTCCTAT,ACTGGATCCTAT	227	1,1
Lib10^4 1 ng	ACTGGTTCTTTA	ACTGGTTCTCTA	160	1
Lib10^4 1 ng	ACTGGTTTGTTG	ACAGGTTTGTTG,ACTGGTATGTTG,ACTGGTCTGTTG,ACTGGTTTGGTG,ACTGTTTTGTTG,ACTNGTTTGTTG,ACTTGTTTGTTG,ATTGGTTTGTTG,CCTGGTTTGTTG	210	1,2,1,1,1,1,1,1,145
Lib10^4 1 ng	ACTGGTTTTCTG	ACTCGTTTTCTG	152	1
Lib10^4 1 ng	ACTGTAATTTAG	ACTGGAATTTAG	78	1
Lib10^4 1 ng	ACTGTACCCCAG	ACTGGACCCCAG,ACTGTACCCCGG,ACTGTACCCCTG,ACTGTAGCCCAG,ACTGTATCCCAG,ACTGTTCCCCAG	216	1,2,2,1,1,1
Lib10^4 1 ng	ACTGTACTTCTG	ACTGGACTTCTG,ACTGTAATTCTG,ATTGTACTTCTG	201	1,1,1
Lib10^4 1 ng	ACTGTATTCTAT	ACTGTANTCTAT,ACTGTATTCAAT,ACTGTATTTTAT,ATTGTATTCTAT	139	1,1,1,1
Lib10^4 1 ng	ACTGTCCTCATT	ACTGCCCTCATT,ACTGTCCGCATT,ATTGTCCTCATT	138	1,1,1
Lib10^4 1 ng	ACTGTCTTGATT	ACTGACTTGATT,ACTGCCTTGATT,ACTGTCTTGATC,ACTGTCTTGGTT,ACTGTCTTGTTT	135	1,1,1,1,3
Lib10^4 1 ng	ACTGTCTTTCAT	ACTGACTTTCAT,ATTGTCTTTCAT	60	1,1
Lib10^4 1 ng	ACTGTGAGGGCC	ACGGTGAGGGCC,ACTGTGGGGGCC,ACTGTGTGGGCC,AGTGTGAGGGCC	310	1,3,4,1
Lib10^4 1 ng	ACTGTGCCTTCC		48
Lib10^4 1 ng	ACTGTGGTTAGG	AATGTGGTTAGG,ACTGTGGTCAGG,ACTGTGGTGAGG,ACTGTGGTTTGG,ACTGTGNTTAGG,ACTGTNGTTAGG	209	1,1,2,1,1,1
Lib10^4 1 ng	ACTGTGTATTTG	ACTGGGTATTTG,ACTGTGTATGTG,ACTGTGTATTTC,ACTGTGTTTTTG	343	2,1,1,1
Lib10^4 1 ng	ACTGTTCGTTGG	ACGGTTCGTTGG,ACTGTNCGTTGG,ACTGTTCGTCGG	157	1,1,1
Lib10^4 1 ng	ACTGTTGATTTC	ACTGATGATTTC,ACTGGTGATTTC,ACTGTAGATTTC,ACTGTGGATTTC,ACTGTTGGTTTC,ACTGTTGTTTTC,ATTGTTGATTTC	135	1,1,1,1,1,1,1
Lib10^4 1 ng	ACTGTTGGCGGG	ACTGGTGGCGGG,ACTGTTGGCGGT	69	1,1
Lib10^4 1 ng	ACTGTTGTGGCT	ACTGTTGTGGGT	53	1
Lib10^4 1 ng	ACTGTTTGGTGC	ACTGGTTGGTGC,ACTGTTTGGAGC	88	1,1
Lib10^4 1 ng	ACTGTTTTCCCA	ACTCTTTTCCCA,ACTGGTTTCCCA,ACTNTTTTCCCA	122	1,1,1
Lib10^4 1 ng	ACTTAACGTTTT	ACTTAACGTATT,ACTTAACGTCTT,ACTTAACGTGTT,ACTTAACGTTTC,ACTTAACGTTTG,ACTTAANGTTTT,AGTTAACGTTTT	278	3,2,1,1,1,1,1
Lib10^4 1 ng	ACTTAATTCAAC	ACTTAACTCAAC,ACTTAATTCAAG	47	1,1
Lib10^4 1 ng	ACTTACCTGAGG	ACTTACCTGAAG,ACTTACCTGGGG,ACTTACCTGTGG,ACTTTCCTGAGG	197	1,10,4,1
Lib10^4 1 ng	ACTTACTGTTCT	ACTTACTGGTCT	128	1
Lib10^4 1 ng	ACTTATACGGGC	ACTNATACGGGC,ACTTATACGTGC,AGTTATACGGGC,TCTTATACGGGC	174	1,1,1,1
Lib10^4 1 ng	ACTTATCTCGTC	ACTTATCTCCTC,ACTTATCTCGGC	134	1,1
[truncated: 64,865 more rows]
