# Supplementary material for: Development of a versatile high-throughput mutagenesis assay with multiplexed short-read NGS using DNA-barcoded supF shuttle vector library amplified in E. coli
Source: eLife journal article supplement (doi:10.7554/elife.83780), 2022-10-10
Supplement: supp [file elife-83780-supp-v1.zip › elife_poa_e83780_Supplementary_file_2.xlsx]

## Sheet: S2
Sample name	BC	Position	Reference sequence	Alt variant sequence	Depth - total coverage	AltDepth - variant coverage	RefFwdReads - reference forward strand coverage	Genotype - genotype description string	AF - allele frequency	Genotype
Lib10^2_#1 1 ng	TAG_BX_AAATGTCTCGCG	55	A	C	15	5	10	A/C	0.3333	SNP
Lib10^2_#1 1 ng	TAG_BX_AAGGGCTTCGAC	69	T	C	324	65	247	T/C	0.2006	SNP
Lib10^2_#1 1 ng	TAG_BX_ACCCATGTGAGG	55	A	C	25	3	20	A/C	0.12	SNP
Lib10^2_#1 1 ng	TAG_BX_ACCCATGTGAGG	69	T	C	25	5	20	T/C	0.2	SNP
Lib10^2_#1 1 ng	TAG_BX_ACCGGAATCAAG	55	A	C	275	32	216	A/C	0.1164	SNP
Lib10^2_#1 1 ng	TAG_BX_AGCAATGGGGAT	49	A	C	23	3	19	A/C	0.1304	SNP
Lib10^2_#1 1 ng	TAG_BX_AGCAATGGGGAT	68	T	C	23	3	18	T/C	0.1304	SNP
Lib10^2_#1 1 ng	TAG_BX_ATCAATGGGTGG	55	A	C	199	25	161	A/C	0.1256	SNP
Lib10^2_#1 1 ng	TAG_BX_ATCAATGGGTGG	69	T	C	199	39	148	T/C	0.196	SNP
Lib10^2_#1 1 ng	TAG_BX_ATTCGTTTTAGA	69	T	C	207	50	146	T/C	0.2415	SNP
Lib10^2_#1 1 ng	TAG_BX_CCTATTCGTTGT	69	T	C	60	10	46	T/C	0.1667	SNP
Lib10^2_#1 1 ng	TAG_BX_CGCCGACATATA	50	G	C	35	5	30	G/C	0.1429	SNP
Lib10^2_#1 1 ng	TAG_BX_CGCCGACATATA	36	G	C	35	4	31	G/C	0.1143	SNP
Lib10^2_#1 1 ng	TAG_BX_CGCCGACATATA	69	T	C	35	7	27	T/C	0.2	SNP
Lib10^2_#1 1 ng	TAG_BX_CGCCGGCCGGTT	69	T	C	58	12	44	T/C	0.2069	SNP
Lib10^2_#1 1 ng	TAG_BX_CTCCTTGTCTTG	69	T	C	54	9	43	T/C	0.1667	SNP
Lib10^2_#1 1 ng	TAG_BX_CTCGAACATAGG	55	A	C	276	34	219	A/C	0.1232	SNP
Lib10^2_#1 1 ng	TAG_BX_CTCTTTTTTGAG	55	A	C	262	43	202	A/C	0.1641	SNP
Lib10^2_#1 1 ng	TAG_BX_CTGCATATGAGC	69	T	C	178	49	122	T/C	0.2753	SNP
Lib10^2_#1 1 ng	TAG_BX_CTTACGTGAGAT	55	A	C	99	14	83	A/C	0.1414	SNP
Lib10^2_#1 1 ng	TAG_BX_GAAAATAGACTG	69	T	C	101	25	74	T/C	0.2475	SNP
Lib10^2_#1 1 ng	TAG_BX_GACCTGGATGCC	69	T	C	248	60	175	T/C	0.2419	SNP
Lib10^2_#1 1 ng	TAG_BX_GCTGACTTTTCG	69	T	C	84	16	63	T/C	0.1905	SNP
Lib10^2_#1 1 ng	TAG_BX_GGTCTCTGGTTG	69	T	C	31	6	24	T/C	0.1935	SNP
Lib10^2_#1 1 ng	TAG_BX_GGTCTCTGGTTG	63	T	G	31	6	25	T/G	0.1935	SNP
Lib10^2_#1 1 ng	TAG_BX_GTACGGTGTTCA	69	T	C	311	67	232	T/C	0.2154	SNP
Lib10^2_#1 1 ng	TAG_BX_GTGAGCCGGGCT	55	A	C	429	53	336	A/C	0.1235	SNP
Lib10^2_#1 1 ng	TAG_BX_GTGTGGTTGGTT	55	A	C	73	15	57	A/C	0.2055	SNP
Lib10^2_#1 1 ng	TAG_BX_GTTGCTAAACAT	69	T	C	33	10	23	T/C	0.303	SNP
Lib10^2_#1 1 ng	TAG_BX_GTTTGTTGGCTC	69	T	C	287	62	214	T/C	0.216	SNP
Lib10^2_#1 1 ng	TAG_BX_TCGCCGTTGATT	69	T	C	19	5	13	T/C	0.2632	SNP
Lib10^2_#1 1 ng	TAG_BX_TGGCCAGACTGG	69	T	C	200	39	149	T/C	0.195	SNP
Lib10^2_#1 1 ng	TAG_BX_TGGGGGGTAACG	69	T	C	69	12	54	T/C	0.1739	SNP
Lib10^2_#1 1 ng	TAG_BX_TGTACTGAGGGA	55	A	C	268	41	209	A/C	0.153	SNP
Lib10^2_#1 1 ng	TAG_BX_TTGGATGCCTAG	55	A	C	421	69	333	A/C	0.1639	SNP
Lib10^2_#1 1 ng	TAG_BX_TTGTAGTATCGG	69	T	C	214	37	171	T/C	0.1729	SNP
Lib10^2_#1 1 ng	TAG_BX_TTTCGTTTTTTT	69	T	C	103	23	72	T/C	0.2233	SNP
Lib10^2_#1 1 ng	TAG_BX_CGTTTGTTGTTA	-57	AGAA		203	202	1	AGAA/	0.9951	Del
Lib10^2_#2 1 ng	TAG_BX_CTATCGGGGCGC	-63	G	GC	371	362	9	G/GC	0.9757	Ins
Lib10^2_#2 1 ng	TAG_BX_AGCGTTTTTCAA	55	A	C	275	40	218	A/C	0.1455	SNP
Lib10^2_#2 1 ng	TAG_BX_AGCTGGGAGATG	69	T	C	504	110	381	T/C	0.2183	SNP
Lib10^2_#2 1 ng	TAG_BX_ATGTGTCGTTCC	55	A	C	259	36	208	A/C	0.139	SNP
Lib10^2_#2 1 ng	TAG_BX_ATTCGCTCTTCA	69	T	C	60	17	40	T/C	0.2833	SNP
Lib10^2_#2 1 ng	TAG_BX_ATTGGAATGGGG	69	T	C	313	69	236	T/C	0.2204	SNP
Lib10^2_#2 1 ng	TAG_BX_ATTTGTAACTAT	69	T	C	216	49	154	T/C	0.2269	SNP
Lib10^2_#2 1 ng	TAG_BX_CACTCTTGTCTT	55	A	C	41	8	27	A/C	0.1951	SNP
Lib10^2_#2 1 ng	TAG_BX_CCATTGGCGTAT	69	T	C	126	24	95	T/C	0.1905	SNP
Lib10^2_#2 1 ng	TAG_BX_CCCGTGTGACTT	69	T	C	196	36	151	T/C	0.1837	SNP
Lib10^2_#2 1 ng	TAG_BX_CGCCGGGCTTGA	69	T	C	311	75	221	T/C	0.2412	SNP
Lib10^2_#2 1 ng	TAG_BX_CTGGGCACTAGG	69	T	C	259	63	190	T/C	0.2432	SNP
Lib10^2_#2 1 ng	TAG_BX_CTGGGGATAGCC	55	A	C	332	43	270	A/C	0.1295	SNP
Lib10^2_#2 1 ng	TAG_BX_CTTGTGTTATGT	69	T	C	203	38	157	T/C	0.1872	SNP
Lib10^2_#2 1 ng	TAG_BX_GCGGTCAGCGTT	69	T	C	256	57	185	T/C	0.2227	SNP
Lib10^2_#2 1 ng	TAG_BX_GGCGACGCGCAT	69	T	C	42	9	32	T/C	0.2143	SNP
Lib10^2_#2 1 ng	TAG_BX_GGTACCATGTAG	69	T	C	198	39	154	T/C	0.197	SNP
Lib10^2_#2 1 ng	TAG_BX_TAAATATGCGCT	69	T	C	266	47	206	T/C	0.1767	SNP
Lib10^2_#2 1 ng	TAG_BX_TAGTCACTGCTT	69	T	C	364	74	270	T/C	0.2033	SNP
Lib10^2_#2 1 ng	TAG_BX_TATATGGACTTG	55	A	C	243	31	196	A/C	0.1276	SNP
Lib10^2_#2 1 ng	TAG_BX_TCCGCTTTCGTT	55	A	C	89	10	77	A/C	0.1124	SNP
Lib10^2_#2 1 ng	TAG_BX_TGAGTGTAGTTG	55	A	C	166	28	131	A/C	0.1687	SNP
Lib10^2_#2 1 ng	TAG_BX_TGTCGTATGGGC	69	T	C	70	11	56	T/C	0.1571	SNP
Lib10^2_#2 1 ng	TAG_BX_TTCGTATATCTT	69	T	C	119	30	86	T/C	0.2521	SNP
Lib10^3 1 ng	TAG_BX_AACATTTCCTGA	69	T	C	374	76	282	T/C	0.2032	SNP
Lib10^3 1 ng	TAG_BX_AACGTGAGTTTT	69	T	C	188	34	142	T/C	0.1809	SNP
Lib10^3 1 ng	TAG_BX_AACTCTGCATTG	55	A	C	237	32	186	A/C	0.135	SNP
Lib10^3 1 ng	TAG_BX_AACTCTGCATTG	69	T	C	237	49	178	T/C	0.2068	SNP
Lib10^3 1 ng	TAG_BX_AAGTGCTTTCGG	55	A	C	79	8	68	A/C	0.1013	SNP
Lib10^3 1 ng	TAG_BX_AAGTTAGTAGGA	69	T	C	248	54	183	T/C	0.2177	SNP
Lib10^3 1 ng	TAG_BX_AATCCGGGTGGA	55	A	C	289	48	226	A/C	0.1661	SNP
Lib10^3 1 ng	TAG_BX_AATCCGGGTGGA	69	T	C	289	60	221	T/C	0.2076	SNP
Lib10^3 1 ng	TAG_BX_AATGGGAATTGG	69	T	C	201	50	146	T/C	0.2488	SNP
Lib10^3 1 ng	TAG_BX_AATGTGACGGTC	69	T	C	159	34	115	T/C	0.2138	SNP
Lib10^3 1 ng	TAG_BX_AATTTTTAACAC	69	T	C	67	15	51	T/C	0.2239	SNP
Lib10^3 1 ng	TAG_BX_ACAATATGACTT	69	T	C	323	63	251	T/C	0.195	SNP
Lib10^3 1 ng	TAG_BX_ACACTTATGCAC	55	A	C	97	17	70	A/C	0.1753	SNP
Lib10^3 1 ng	TAG_BX_ACATATCCGGAC	55	A	C	250	32	201	A/C	0.128	SNP
Lib10^3 1 ng	TAG_BX_ACCCTACTTTAT	55	A	C	218	22	171	A/C	0.1009	SNP
Lib10^3 1 ng	TAG_BX_ACCGTCTACGCG	55	A	C	154	23	124	A/C	0.1494	SNP
Lib10^3 1 ng	TAG_BX_ACGACTCGTGGA	69	T	C	239	53	181	T/C	0.2218	SNP
Lib10^3 1 ng	TAG_BX_ACGATATTTGAA	69	T	C	256	58	189	T/C	0.2266	SNP
Lib10^3 1 ng	TAG_BX_ACGCACATGTTA	55	A	C	192	26	150	A/C	0.1354	SNP
Lib10^3 1 ng	TAG_BX_ACTCTGGTTCTT	69	T	C	236	41	178	T/C	0.1737	SNP
Lib10^3 1 ng	TAG_BX_ACTTGACGTCTC	69	T	C	330	75	236	T/C	0.2273	SNP
Lib10^3 1 ng	TAG_BX_AGACCTCTGCTG	69	T	C	274	59	208	T/C	0.2153	SNP
Lib10^3 1 ng	TAG_BX_AGACTATTTGTA	69	T	C	257	55	186	T/C	0.214	SNP
Lib10^3 1 ng	TAG_BX_AGAGGAGATTAC	69	T	C	168	30	135	T/C	0.1786	SNP
Lib10^3 1 ng	TAG_BX_AGCCGCTCAGCC	69	T	C	198	44	146	T/C	0.2222	SNP
Lib10^3 1 ng	TAG_BX_AGCTTCTTTGCT	69	T	C	204	45	151	T/C	0.2206	SNP
Lib10^3 1 ng	TAG_BX_AGGAGTCCACTG	69	T	C	40	8	31	T/C	0.2	SNP
Lib10^3 1 ng	TAG_BX_AGGATTGAGGTC	69	T	C	363	77	266	T/C	0.2121	SNP
Lib10^3 1 ng	TAG_BX_AGGTCATGTTTG	55	A	C	360	43	286	A/C	0.1194	SNP
Lib10^3 1 ng	TAG_BX_AGGTGTCCATAG	69	T	C	136	34	98	T/C	0.25	SNP
Lib10^3 1 ng	TAG_BX_AGTAGTTTCTTG	69	T	C	140	26	108	T/C	0.1857	SNP
Lib10^3 1 ng	TAG_BX_AGTATTGGTGTG	69	T	C	222	50	168	T/C	0.2252	SNP
Lib10^3 1 ng	TAG_BX_AGTGCTTATACC	55	A	C	202	21	167	A/C	0.104	SNP
Lib10^3 1 ng	TAG_BX_AGTGCTTATACC	69	T	C	202	41	158	T/C	0.203	SNP
Lib10^3 1 ng	TAG_BX_AGTGTGCCTATT	55	A	C	231	30	185	A/C	0.1299	SNP
Lib10^3 1 ng	TAG_BX_AGTGTGGGGATA	55	A	C	200	32	155	A/C	0.16	SNP
Lib10^3 1 ng	TAG_BX_AGTGTGTTTTCA	69	T	C	230	58	167	T/C	0.2522	SNP
Lib10^3 1 ng	TAG_BX_AGTGTTTTTTGT	69	T	C	146	20	123	T/C	0.137	SNP
Lib10^3 1 ng	TAG_BX_AGTTGAATTATG	69	T	C	83	16	67	T/C	0.1928	SNP
Lib10^3 1 ng	TAG_BX_ATACCTGTTAAT	55	A	C	63	11	45	A/C	0.1746	SNP
Lib10^3 1 ng	TAG_BX_ATAGGCATGTAG	69	T	C	236	40	183	T/C	0.1695	SNP
Lib10^3 1 ng	TAG_BX_ATAGGTAATATC	55	A	C	213	30	169	A/C	0.1408	SNP
Lib10^3 1 ng	TAG_BX_ATAGTTTCCACA	69	T	C	57	11	44	T/C	0.193	SNP
Lib10^3 1 ng	TAG_BX_ATATCAAGACCG	69	T	C	319	59	243	T/C	0.185	SNP
Lib10^3 1 ng	TAG_BX_ATATCCCAATCT	55	A	C	140	18	112	A/C	0.1286	SNP
Lib10^3 1 ng	TAG_BX_ATATCTCGGAGG	69	T	C	217	47	165	T/C	0.2166	SNP
Lib10^3 1 ng	TAG_BX_ATCAGATTCAAG	55	A	C	34	6	27	A/C	0.1765	SNP
Lib10^3 1 ng	TAG_BX_ATCAGATTCAAG	69	T	C	34	4	28	T/C	0.1176	SNP
Lib10^3 1 ng	TAG_BX_ATCCCTTATTTG	55	A	C	256	29	197	A/C	0.1133	SNP
Lib10^3 1 ng	TAG_BX_ATCCGGACGGAA	69	T	C	183	37	139	T/C	0.2022	SNP
Lib10^3 1 ng	TAG_BX_ATCCGGACGGAA	55	A	C	183	29	135	A/C	0.1585	SNP
Lib10^3 1 ng	TAG_BX_ATCCGTTCTGGC	69	T	C	208	59	145	T/C	0.2837	SNP
Lib10^3 1 ng	TAG_BX_ATCGAATTACAT	58	T	G	128	13	111	T/G	0.1016	SNP
Lib10^3 1 ng	TAG_BX_ATCGCGAGAATA	68	T	C	88	10	75	T/C	0.1136	SNP
Lib10^3 1 ng	TAG_BX_ATCGCGAGAATA	55	A	C	88	9	76	A/C	0.1023	SNP
Lib10^3 1 ng	TAG_BX_ATCTCACACTGG	69	T	C	241	55	172	T/C	0.2282	SNP
Lib10^3 1 ng	TAG_BX_ATCTTCCTCCTA	55	A	C	191	28	152	A/C	0.1466	SNP
Lib10^3 1 ng	TAG_BX_ATCTTGTGTTGC	69	T	C	276	58	207	T/C	0.2101	SNP
Lib10^3 1 ng	TAG_BX_ATCTTTTGGTCG	69	T	C	174	30	138	T/C	0.1724	SNP
Lib10^3 1 ng	TAG_BX_ATGAATTGGCAT	69	T	C	271	53	211	T/C	0.1956	SNP
Lib10^3 1 ng	TAG_BX_ATGAGGATGTGC	69	T	C	301	57	233	T/C	0.1894	SNP
Lib10^3 1 ng	TAG_BX_ATGATGTGGTTT	69	T	C	159	38	117	T/C	0.239	SNP
Lib10^3 1 ng	TAG_BX_ATGATTCGAAGG	69	T	C	355	62	281	T/C	0.1746	SNP
Lib10^3 1 ng	TAG_BX_ATGCGCCACATG	55	A	C	276	32	225	A/C	0.1159	SNP
Lib10^3 1 ng	TAG_BX_ATGGAATTTCGT	69	T	C	135	31	97	T/C	0.2296	SNP
Lib10^3 1 ng	TAG_BX_ATGGACCGGCGT	55	A	C	267	38	212	A/C	0.1423	SNP
Lib10^3 1 ng	TAG_BX_ATGGCTTCGTCC	69	T	C	50	8	41	T/C	0.16	SNP
Lib10^3 1 ng	TAG_BX_ATGGCTTCGTCC	60	T	G	50	6	42	T/G	0.12	SNP
Lib10^3 1 ng	TAG_BX_ATGTAGGACTGA	69	T	C	382	85	286	T/C	0.2225	SNP
Lib10^3 1 ng	TAG_BX_ATGTCAGCAGTG	69	T	C	299	67	223	T/C	0.2241	SNP
Lib10^3 1 ng	TAG_BX_ATGTCGCCTAGA	69	T	C	336	67	256	T/C	0.1994	SNP
Lib10^3 1 ng	TAG_BX_ATGTCGCCTAGA	55	A	C	336	45	262	A/C	0.1339	SNP
Lib10^3 1 ng	TAG_BX_ATGTCTGGAATT	55	A	C	84	16	57	A/C	0.1905	SNP
Lib10^3 1 ng	TAG_BX_ATGTCTGGAATT	69	T	C	84	25	55	T/C	0.2976	SNP
Lib10^3 1 ng	TAG_BX_ATGTTCCATCTT	69	T	C	239	54	180	T/C	0.2259	SNP
Lib10^3 1 ng	TAG_BX_ATGTTCTATAAT	69	T	C	155	38	114	T/C	0.2452	SNP
Lib10^3 1 ng	TAG_BX_ATGTTGTTTGTA	69	T	C	148	37	107	T/C	0.25	SNP
Lib10^3 1 ng	TAG_BX_ATTAGCATATCC	55	A	C	160	23	125	A/C	0.1437	SNP
Lib10^3 1 ng	TAG_BX_ATTATAGTGGAT	69	T	C	234	43	185	T/C	0.1838	SNP
Lib10^3 1 ng	TAG_BX_ATTCTAGGACTG	55	A	C	330	52	254	A/C	0.1576	SNP
Lib10^3 1 ng	TAG_BX_ATTCTCGTGCTA	55	A	C	160	24	128	A/C	0.15	SNP
Lib10^3 1 ng	TAG_BX_ATTGTGGGTCAC	69	T	C	282	71	199	T/C	0.2518	SNP
Lib10^3 1 ng	TAG_BX_ATTTGGCTGAAT	55	A	C	134	19	101	A/C	0.1418	SNP
Lib10^3 1 ng	TAG_BX_ATTTGGCTGAAT	69	T	C	134	24	108	T/C	0.1791	SNP
Lib10^3 1 ng	TAG_BX_ATTTTCTAACTC	69	T	C	133	24	105	T/C	0.1805	SNP
Lib10^3 1 ng	TAG_BX_CAACATGCCTTC	69	T	C	80	18	58	T/C	0.225	SNP
Lib10^3 1 ng	TAG_BX_CAACATGCCTTC	55	A	C	80	11	64	A/C	0.1375	SNP
Lib10^3 1 ng	TAG_BX_CAACTAGTTCTG	69	T	C	228	61	161	T/C	0.2675	SNP
Lib10^3 1 ng	TAG_BX_CAAGCAACAATT	69	T	C	72	14	56	T/C	0.1944	SNP
Lib10^3 1 ng	TAG_BX_CAAGTGGTTCGT	69	T	C	196	39	147	T/C	0.199	SNP
Lib10^3 1 ng	TAG_BX_CAATGCCGCTAC	69	T	C	49	12	33	T/C	0.2449	SNP
Lib10^3 1 ng	TAG_BX_CAATGCCGCTAC	58	T	G	49	6	42	T/G	0.1224	SNP
Lib10^3 1 ng	TAG_BX_CACATACGTGGA	55	A	C	213	26	173	A/C	0.1221	SNP
Lib10^3 1 ng	TAG_BX_CACGACGTGCCA	55	A	C	157	25	124	A/C	0.1592	SNP
Lib10^3 1 ng	TAG_BX_CACTATACAATT	55	A	C	128	14	107	A/C	0.1094	SNP
Lib10^3 1 ng	TAG_BX_CAGATGTTTACT	69	T	C	316	59	251	T/C	0.1867	SNP
Lib10^3 1 ng	TAG_BX_CAGGCTGCTTCA	55	A	C	224	23	184	A/C	0.1027	SNP
Lib10^3 1 ng	TAG_BX_CAGGCTGCTTCA	69	T	C	224	54	163	T/C	0.2411	SNP
Lib10^3 1 ng	TAG_BX_CAGGTTCTTGGA	69	T	C	202	29	165	T/C	0.1436	SNP
Lib10^3 1 ng	TAG_BX_CAGTCGCAAGAC	69	T	C	295	72	209	T/C	0.2441	SNP
Lib10^3 1 ng	TAG_BX_CAGTGGATAGAT	69	T	C	122	26	92	T/C	0.2131	SNP
Lib10^3 1 ng	TAG_BX_CAGTGGATAGAT	55	A	C	122	18	99	A/C	0.1475	SNP
Lib10^3 1 ng	TAG_BX_CAGTTGCTGGAC	69	T	C	273	49	210	T/C	0.1795	SNP
Lib10^3 1 ng	TAG_BX_CAGTTGCTGGAC	55	A	C	273	33	227	A/C	0.1209	SNP
Lib10^3 1 ng	TAG_BX_CATAAATTGCGA	69	T	C	104	26	74	T/C	0.25	SNP
Lib10^3 1 ng	TAG_BX_CATCTGGCGGAC	69	T	C	207	42	159	T/C	0.2029	SNP
Lib10^3 1 ng	TAG_BX_CATCTGGCGGAC	55	A	C	207	30	163	A/C	0.1449	SNP
Lib10^3 1 ng	TAG_BX_CATGATAGGTAT	55	A	C	149	17	123	A/C	0.1141	SNP
Lib10^3 1 ng	TAG_BX_CATTCTGCGACG	55	A	C	286	49	221	A/C	0.1713	SNP
Lib10^3 1 ng	TAG_BX_CATTGGCATGCA	55	A	C	208	24	171	A/C	0.1154	SNP
Lib10^3 1 ng	TAG_BX_CCAAAGTCACTA	69	T	C	208	50	151	T/C	0.2404	SNP
Lib10^3 1 ng	TAG_BX_CCAAGTTGTTAA	69	T	C	227	54	163	T/C	0.2379	SNP
Lib10^3 1 ng	TAG_BX_CCACTCGGAGGC	69	T	C	205	39	163	T/C	0.1902	SNP
Lib10^3 1 ng	TAG_BX_CCAGTTCCAAGA	69	T	C	283	68	206	T/C	0.2403	SNP
Lib10^3 1 ng	TAG_BX_CCATATCGTTGG	69	T	C	115	27	82	T/C	0.2348	SNP
Lib10^3 1 ng	TAG_BX_CCATTGCCGGTT	55	A	C	92	12	66	A/C	0.1304	SNP
Lib10^3 1 ng	TAG_BX_CCATTGCCGGTT	69	T	C	92	15	73	T/C	0.163	SNP
Lib10^3 1 ng	TAG_BX_CCATTGTTTGAT	69	T	C	230	50	173	T/C	0.2174	SNP
Lib10^3 1 ng	TAG_BX_CCCCGACGCGTA	69	T	C	145	26	112	T/C	0.1793	SNP
Lib10^3 1 ng	TAG_BX_CCCCGACGCGTA	55	A	C	145	19	116	A/C	0.131	SNP
Lib10^3 1 ng	TAG_BX_CCCTCCGGTCAC	69	T	C	94	18	71	T/C	0.1915	SNP
Lib10^3 1 ng	TAG_BX_CCCTGTATAGGA	69	T	C	99	20	76	T/C	0.202	SNP
Lib10^3 1 ng	TAG_BX_CCCTGTATAGGA	55	A	C	99	10	85	A/C	0.101	SNP
Lib10^3 1 ng	TAG_BX_CCGACATTAATT	69	T	C	129	31	91	T/C	0.2403	SNP
Lib10^3 1 ng	TAG_BX_CCGATCAGACTA	55	A	C	172	29	136	A/C	0.1686	SNP
Lib10^3 1 ng	TAG_BX_CCGGCCGTTCCG	69	T	C	158	30	124	T/C	0.1899	SNP
Lib10^3 1 ng	TAG_BX_CCGGTGTTGGAA	55	A	C	227	36	180	A/C	0.1586	SNP
Lib10^3 1 ng	TAG_BX_CCGTAGCTACTA	55	A	C	47	11	36	A/C	0.234	SNP
Lib10^3 1 ng	TAG_BX_CCGTGAATCGTG	69	T	C	178	38	133	T/C	0.2135	SNP
Lib10^3 1 ng	TAG_BX_CCTCTGGCTTTG	55	A	C	104	13	83	A/C	0.125	SNP
Lib10^3 1 ng	TAG_BX_CCTGGAATGGGA	55	A	C	157	22	123	A/C	0.1401	SNP
Lib10^3 1 ng	TAG_BX_CCTGGCGGAGTT	55	A	C	37	10	26	A/C	0.2703	SNP
Lib10^3 1 ng	TAG_BX_CCTTCGCTCTGC	69	T	C	135	30	102	T/C	0.2222	SNP
Lib10^3 1 ng	TAG_BX_CCTTCTCCTCGA	69	T	C	256	63	188	T/C	0.2461	SNP
Lib10^3 1 ng	TAG_BX_CCTTCTGTGTGT	55	A	C	152	21	125	A/C	0.1382	SNP
Lib10^3 1 ng	TAG_BX_CCTTGCGTCTCG	55	A	C	162	26	120	A/C	0.1605	SNP
Lib10^3 1 ng	TAG_BX_CCTTTTACCCCA	55	A	C	96	17	76	A/C	0.1771	SNP
Lib10^3 1 ng	TAG_BX_CGAAATTAGGCG	69	T	C	122	27	93	T/C	0.2213	SNP
Lib10^3 1 ng	TAG_BX_CGAATCCAAACG	69	T	C	219	42	169	T/C	0.1918	SNP
Lib10^3 1 ng	TAG_BX_CGAGGAGGGGTT	55	A	C	250	29	199	A/C	0.116	SNP
Lib10^3 1 ng	TAG_BX_CGAGGAGGGGTT	69	T	C	250	56	188	T/C	0.224	SNP
Lib10^3 1 ng	TAG_BX_CGAGGCGGCGAT	55	A	C	205	33	154	A/C	0.161	SNP
Lib10^3 1 ng	TAG_BX_CGATCCGTTGCA	69	T	C	82	13	66	T/C	0.1585	SNP
Lib10^3 1 ng	TAG_BX_CGATCTTTTGCG	69	T	C	36	4	30	T/C	0.1111	SNP
Lib10^3 1 ng	TAG_BX_CGATTTCTTGAA	55	A	C	232	36	183	A/C	0.1552	SNP
Lib10^3 1 ng	TAG_BX_CGATTTCTTGAA	69	T	C	233	49	177	T/C	0.2103	SNP
Lib10^3 1 ng	TAG_BX_CGATTTGCGTAA	69	T	C	26	4	21	T/C	0.1538	SNP
Lib10^3 1 ng	TAG_BX_CGCCCTCTTCAA	69	T	C	283	58	218	T/C	0.2049	SNP
Lib10^3 1 ng	TAG_BX_CGCGTGGTATAT	47	A	C	47	5	41	A/C	0.1064	SNP
Lib10^3 1 ng	TAG_BX_CGCTATCAATAG	55	A	C	150	27	115	A/C	0.18	SNP
Lib10^3 1 ng	TAG_BX_CGGACGTCCCCA	55	A	C	186	29	148	A/C	0.1559	SNP
Lib10^3 1 ng	TAG_BX_CGGCCGTTGATT	55	A	C	138	19	109	A/C	0.1377	SNP
Lib10^3 1 ng	TAG_BX_CGGCGTCACCAC	55	A	C	266	47	204	A/C	0.1767	SNP
Lib10^3 1 ng	TAG_BX_CGGGATCGTTGA	69	T	C	301	65	218	T/C	0.2159	SNP
Lib10^3 1 ng	TAG_BX_CGGGGACCCGCA	69	T	C	160	32	120	T/C	0.2	SNP
Lib10^3 1 ng	TAG_BX_CGGTTTCCACGT	69	T	C	207	46	155	T/C	0.2222	SNP
Lib10^3 1 ng	TAG_BX_CGTACGAATGCC	69	T	C	97	18	77	T/C	0.1856	SNP
Lib10^3 1 ng	TAG_BX_CGTATACCCCCT	55	A	C	42	5	35	A/C	0.119	SNP
Lib10^3 1 ng	TAG_BX_CGTATTACCTGA	69	T	C	149	27	115	T/C	0.1812	SNP
Lib10^3 1 ng	TAG_BX_CGTCTGTGAAGC	69	T	C	301	80	201	T/C	0.2658	SNP
Lib10^3 1 ng	TAG_BX_CGTCTGTGAAGC	55	A	C	301	41	236	A/C	0.1362	SNP
Lib10^3 1 ng	TAG_BX_CGTTCGTTAATT	69	T	C	200	42	150	T/C	0.21	SNP
Lib10^3 1 ng	TAG_BX_CGTTGCTCCGTC	55	A	C	291	38	239	A/C	0.1306	SNP
Lib10^3 1 ng	TAG_BX_CGTTTGTCCCCT	69	T	C	252	63	180	T/C	0.25	SNP
Lib10^3 1 ng	TAG_BX_CGTTTTAGTGTC	55	A	C	83	14	66	A/C	0.1687	SNP
Lib10^3 1 ng	TAG_BX_CGTTTTAGTGTC	69	T	C	83	14	65	T/C	0.1687	SNP
Lib10^3 1 ng	TAG_BX_CGTTTTAGTGTC	35	A	G	83	10	63	A/G	0.1205	SNP
Lib10^3 1 ng	TAG_BX_CTAAAAACGATC	63	T	G	41	7	34	T/G	0.1707	SNP
Lib10^3 1 ng	TAG_BX_CTACTCTCGAGC	69	T	C	40	6	33	T/C	0.15	SNP
Lib10^3 1 ng	TAG_BX_CTAGGGGTTGGG	55	A	C	198	26	162	A/C	0.1313	SNP
Lib10^3 1 ng	TAG_BX_CTAGTGCGTGTG	69	T	C	292	61	220	T/C	0.2089	SNP
Lib10^3 1 ng	TAG_BX_CTCAGAGGTTGA	69	T	C	211	46	151	T/C	0.218	SNP
Lib10^3 1 ng	TAG_BX_CTCATTGCCTGC	69	T	C	260	60	192	T/C	0.2308	SNP
Lib10^3 1 ng	TAG_BX_CTCCTTGATAAC	55	A	C	237	36	184	A/C	0.1519	SNP
Lib10^3 1 ng	TAG_BX_CTCGTGTGTTCT	69	T	C	283	68	208	T/C	0.2403	SNP
Lib10^3 1 ng	TAG_BX_CTGCAGATTGGT	69	T	C	237	45	177	T/C	0.1899	SNP
Lib10^3 1 ng	TAG_BX_CTGCGGTCTTTT	69	T	C	85	14	66	T/C	0.1647	SNP
Lib10^3 1 ng	TAG_BX_CTGCTTGTGGAG	69	T	C	226	55	165	T/C	0.2434	SNP
Lib10^3 1 ng	TAG_BX_CTGGAGTGTCGG	69	T	C	142	28	113	T/C	0.1972	SNP
Lib10^3 1 ng	TAG_BX_CTGTGTGCGGCT	69	T	C	349	79	258	T/C	0.2264	SNP
Lib10^3 1 ng	TAG_BX_CTGTTATGATGG	55	A	C	183	26	149	A/C	0.1421	SNP
Lib10^3 1 ng	TAG_BX_CTGTTGGATTTT	69	T	C	50	8	40	T/C	0.16	SNP
Lib10^3 1 ng	TAG_BX_CTTGAAAGACGT	69	T	C	285	69	207	T/C	0.2421	SNP
Lib10^3 1 ng	TAG_BX_CTTTATTGAAAG	69	T	C	158	24	127	T/C	0.1519	SNP
Lib10^3 1 ng	TAG_BX_CTTTCGTTACGA	55	A	C	147	28	111	A/C	0.1905	SNP
Lib10^3 1 ng	TAG_BX_CTTTGAAGCCTT	69	T	C	253	54	189	T/C	0.2134	SNP
Lib10^3 1 ng	TAG_BX_CTTTTTGATTTC	69	T	C	173	49	119	T/C	0.2832	SNP
Lib10^3 1 ng	TAG_BX_GAACAAAGCAGG	69	T	C	57	13	42	T/C	0.2281	SNP
Lib10^3 1 ng	TAG_BX_GAAGCCCACTAA	69	T	C	197	45	142	T/C	0.2284	SNP
Lib10^3 1 ng	TAG_BX_GAATCAGAGCAA	69	T	C	258	50	201	T/C	0.1938	SNP
Lib10^3 1 ng	TAG_BX_GACCCCCTTTCT	69	T	C	228	39	179	T/C	0.1711	SNP
Lib10^3 1 ng	TAG_BX_GACGATTCTGTA	69	T	C	173	39	121	T/C	0.2254	SNP
Lib10^3 1 ng	TAG_BX_GACGGACGCTTC	69	T	C	146	26	114	T/C	0.1781	SNP
Lib10^3 1 ng	TAG_BX_GACGTCCTGCCT	69	T	C	160	41	113	T/C	0.2562	SNP
Lib10^3 1 ng	TAG_BX_GACTACGAGATT	69	T	C	175	28	138	T/C	0.16	SNP
Lib10^3 1 ng	TAG_BX_GAGCGTGCTTGG	69	T	C	242	61	174	T/C	0.2521	SNP
Lib10^3 1 ng	TAG_BX_GAGGATTCGCCT	55	A	C	206	30	170	A/C	0.1456	SNP
Lib10^3 1 ng	TAG_BX_GAGGATTTTTAG	69	T	C	205	45	154	T/C	0.2195	SNP
Lib10^3 1 ng	TAG_BX_GAGGCTAGGTTG	69	T	C	171	34	129	T/C	0.1988	SNP
Lib10^3 1 ng	TAG_BX_GAGGGGGTGGTT	69	T	C	353	70	268	T/C	0.1983	SNP
Lib10^3 1 ng	TAG_BX_GAGGTTCAGGGG	55	A	C	145	16	120	A/C	0.1103	SNP
Lib10^3 1 ng	TAG_BX_GAGTTAGAGGTG	69	T	C	200	48	142	T/C	0.24	SNP
Lib10^3 1 ng	TAG_BX_GATAGAGTTGTA	55	A	C	282	39	224	A/C	0.1383	SNP
Lib10^3 1 ng	TAG_BX_GATATACGGGCG	69	T	C	319	73	235	T/C	0.2288	SNP
Lib10^3 1 ng	TAG_BX_GATGAGAGGATA	69	T	C	594	128	441	T/C	0.2155	SNP
Lib10^3 1 ng	TAG_BX_GATGCACTCTTA	55	A	C	65	9	54	A/C	0.1385	SNP
Lib10^3 1 ng	TAG_BX_GATGCACTCTTA	69	T	C	65	16	48	T/C	0.2462	SNP
Lib10^3 1 ng	TAG_BX_GATTACTTGTGA	55	A	C	245	26	201	A/C	0.1061	SNP
Lib10^3 1 ng	TAG_BX_GCAAAAGGTGTT	69	T	C	185	51	127	T/C	0.2757	SNP
Lib10^3 1 ng	TAG_BX_GCAAAAGGTGTT	55	A	C	185	28	149	A/C	0.1514	SNP
Lib10^3 1 ng	TAG_BX_GCACCCTACGAT	69	T	C	275	54	207	T/C	0.1964	SNP
Lib10^3 1 ng	TAG_BX_GCACTGCGCTTG	69	T	C	332	76	247	T/C	0.2289	SNP
Lib10^3 1 ng	TAG_BX_GCAGTGAATATG	69	T	C	180	48	127	T/C	0.2667	SNP
Lib10^3 1 ng	TAG_BX_GCATGGTATCAC	55	A	C	229	30	185	A/C	0.131	SNP
Lib10^3 1 ng	TAG_BX_GCATTGTTTAGC	69	T	C	287	59	220	T/C	0.2056	SNP
Lib10^3 1 ng	TAG_BX_GCCAATCCTGTT	69	T	C	172	40	126	T/C	0.2326	SNP
Lib10^3 1 ng	TAG_BX_GCCCCGCGTTTA	69	T	C	129	22	103	T/C	0.1705	SNP
Lib10^3 1 ng	TAG_BX_GCCCTTGGAGTT	69	T	C	523	97	402	T/C	0.1855	SNP
Lib10^3 1 ng	TAG_BX_GCCTTTTGTTAA	69	T	C	90	19	69	T/C	0.2111	SNP
Lib10^3 1 ng	TAG_BX_GCGATCTGTCGT	69	T	C	192	34	149	T/C	0.1771	SNP
Lib10^3 1 ng	TAG_BX_GCGCGTTTAGGT	69	T	C	244	54	181	T/C	0.2213	SNP
Lib10^3 1 ng	TAG_BX_GCGGAGGTCTAT	69	T	C	130	32	93	T/C	0.2462	SNP
Lib10^3 1 ng	TAG_BX_GCGGATCTTTTC	69	T	C	144	35	104	T/C	0.2431	SNP
Lib10^3 1 ng	TAG_BX_GCGGCTGGGGCA	69	T	C	304	64	231	T/C	0.2105	SNP
Lib10^3 1 ng	TAG_BX_GCTACTTGCTCT	69	T	C	62	10	49	T/C	0.1613	SNP
Lib10^3 1 ng	TAG_BX_GCTCAGGTTCGG	55	A	C	141	24	107	A/C	0.1702	SNP
Lib10^3 1 ng	TAG_BX_GCTCGAATGGCC	55	A	C	172	23	140	A/C	0.1337	SNP
Lib10^3 1 ng	TAG_BX_GCTCGTGGCAAG	69	T	C	249	50	194	T/C	0.2008	SNP
Lib10^3 1 ng	TAG_BX_GCTCGTGGCAAG	55	A	C	249	37	197	A/C	0.1486	SNP
Lib10^3 1 ng	TAG_BX_GCTCTCCCCGCT	55	A	C	240	37	187	A/C	0.1542	SNP
Lib10^3 1 ng	TAG_BX_GCTTCGTCCCGT	69	T	C	243	63	173	T/C	0.2593	SNP
Lib10^3 1 ng	TAG_BX_GCTTGATAGGCT	55	A	C	143	25	108	A/C	0.1748	SNP
Lib10^3 1 ng	TAG_BX_GCTTGGTAGGGC	55	A	C	221	32	176	A/C	0.1448	SNP
Lib10^3 1 ng	TAG_BX_GCTTGTGGGAGT	55	A	C	367	50	301	A/C	0.1362	SNP
Lib10^3 1 ng	TAG_BX_GCTTGTTCTTTA	55	A	C	60	8	47	A/C	0.1333	SNP
Lib10^3 1 ng	TAG_BX_GCTTTGCCTTGC	69	T	C	74	13	57	T/C	0.1757	SNP
Lib10^3 1 ng	TAG_BX_GGATACTTTCTA	55	A	C	216	26	173	A/C	0.1204	SNP
Lib10^3 1 ng	TAG_BX_GGATCATCGGGA	69	T	C	131	18	106	T/C	0.1374	SNP
Lib10^3 1 ng	TAG_BX_GGCACTATTAGA	69	T	C	301	75	214	T/C	0.2492	SNP
Lib10^3 1 ng	TAG_BX_GGCCATGAGTTC	55	A	C	66	14	50	A/C	0.2121	SNP
Lib10^3 1 ng	TAG_BX_GGCCCGGGCTCG	69	T	C	73	23	48	T/C	0.3151	SNP
Lib10^3 1 ng	TAG_BX_GGCCTATTCCTA	69	T	C	236	54	172	T/C	0.2288	SNP
Lib10^3 1 ng	TAG_BX_GGCCTGGACCAT	69	T	C	306	66	227	T/C	0.2157	SNP
Lib10^3 1 ng	TAG_BX_GGCCTTATCATC	69	T	C	233	59	165	T/C	0.2532	SNP
Lib10^3 1 ng	TAG_BX_GGCGCCCAACTT	69	T	C	182	40	135	T/C	0.2198	SNP
Lib10^3 1 ng	TAG_BX_GGCGGATCCTAG	69	T	C	143	21	117	T/C	0.1469	SNP
Lib10^3 1 ng	TAG_BX_GGCTATAGGCTG	55	A	C	75	10	57	A/C	0.1333	SNP
Lib10^3 1 ng	TAG_BX_GGCTATGTAGCT	55	A	C	367	49	290	A/C	0.1335	SNP
Lib10^3 1 ng	TAG_BX_GGGACTCTTTGA	55	A	C	75	9	63	A/C	0.12	SNP
Lib10^3 1 ng	TAG_BX_GGGGGGCTTTAG	55	A	C	141	22	109	A/C	0.156	SNP
Lib10^3 1 ng	TAG_BX_GGGGTCTAATTC	69	T	C	134	33	91	T/C	0.2463	SNP
Lib10^3 1 ng	TAG_BX_GGGTCATTGGGG	69	T	C	284	51	218	T/C	0.1796	SNP
Lib10^3 1 ng	TAG_BX_GGGTTTACTCTT	69	T	C	234	53	175	T/C	0.2265	SNP
Lib10^3 1 ng	TAG_BX_GGGTTTCCCCGG	55	A	C	218	28	176	A/C	0.1284	SNP
Lib10^3 1 ng	TAG_BX_GGTAACAAATGC	69	T	C	282	54	214	T/C	0.1915	SNP
Lib10^3 1 ng	TAG_BX_GGTACAAGTTGA	69	T	C	307	69	224	T/C	0.2248	SNP
Lib10^3 1 ng	TAG_BX_GGTAGCGTGGGG	69	T	C	376	81	282	T/C	0.2154	SNP
Lib10^3 1 ng	TAG_BX_GGTCCCTTCTCA	55	A	C	49	5	40	A/C	0.102	SNP
Lib10^3 1 ng	TAG_BX_GGTCTTATGGTC	69	T	C	210	38	160	T/C	0.181	SNP
Lib10^3 1 ng	TAG_BX_GGTGAAGGGGTC	55	A	C	193	26	151	A/C	0.1347	SNP
Lib10^3 1 ng	TAG_BX_GGTGAATATTGA	69	T	C	156	34	116	T/C	0.2179	SNP
Lib10^3 1 ng	TAG_BX_GGTGGCTATCAC	55	A	C	219	29	176	A/C	0.1324	SNP
Lib10^3 1 ng	TAG_BX_GGTGGCTCCATA	69	T	C	215	49	158	T/C	0.2279	SNP
Lib10^3 1 ng	TAG_BX_GGTGTCGCCTCG	69	T	C	212	39	165	T/C	0.184	SNP
Lib10^3 1 ng	TAG_BX_GGTGTGTTTATT	69	T	C	213	52	154	T/C	0.2441	SNP
Lib10^3 1 ng	TAG_BX_GGTTATGTCAGG	55	A	C	191	22	153	A/C	0.1152	SNP
Lib10^3 1 ng	TAG_BX_GGTTGGCAGCTC	69	T	C	254	58	189	T/C	0.2283	SNP
Lib10^3 1 ng	TAG_BX_GGTTGTTTGTTG	55	A	C	108	14	86	A/C	0.1296	SNP
Lib10^3 1 ng	TAG_BX_GGTTGTTTGTTG	69	T	C	108	23	82	T/C	0.213	SNP
Lib10^3 1 ng	TAG_BX_GGTTTCTGCCAT	69	T	C	160	40	112	T/C	0.25	SNP
Lib10^3 1 ng	TAG_BX_GTAAAGGCGGGA	55	A	C	214	25	175	A/C	0.1168	SNP
Lib10^3 1 ng	TAG_BX_GTACTGAAGCGC	69	T	C	342	75	249	T/C	0.2193	SNP
Lib10^3 1 ng	TAG_BX_GTACTGGTAGTT	69	T	C	255	56	188	T/C	0.2196	SNP
Lib10^3 1 ng	TAG_BX_GTAGGGCGAACG	69	T	C	267	53	204	T/C	0.1985	SNP
Lib10^3 1 ng	TAG_BX_GTAGGGTTACGC	55	A	C	312	45	243	A/C	0.1442	SNP
Lib10^3 1 ng	TAG_BX_GTAGGTGTAAGA	69	T	C	350	65	270	T/C	0.1857	SNP
Lib10^3 1 ng	TAG_BX_GTATTCGGGTTT	69	T	C	35	5	30	T/C	0.1429	SNP
Lib10^3 1 ng	TAG_BX_GTCAGCATTATG	69	T	C	50	6	42	T/C	0.12	SNP
Lib10^3 1 ng	TAG_BX_GTCATCGAGAGC	55	A	C	183	23	146	A/C	0.1257	SNP
Lib10^3 1 ng	TAG_BX_GTCCCGAACTTG	69	T	C	245	72	167	T/C	0.2939	SNP
Lib10^3 1 ng	TAG_BX_GTCCGTTCGTTT	69	T	C	40	6	31	T/C	0.15	SNP
Lib10^3 1 ng	TAG_BX_GTCCTGGTCACG	69	T	C	193	35	150	T/C	0.1813	SNP
Lib10^3 1 ng	TAG_BX_GTCCTTCTGGGT	55	A	C	98	17	74	A/C	0.1735	SNP
Lib10^3 1 ng	TAG_BX_GTCGCTGGTTAG	55	A	C	67	7	56	A/C	0.1045	SNP
Lib10^3 1 ng	TAG_BX_GTCGCTGGTTAG	69	T	C	67	18	49	T/C	0.2687	SNP
Lib10^3 1 ng	TAG_BX_GTCGCTGGTTAG	68	T	C	67	10	51	T/C	0.1493	SNP
Lib10^3 1 ng	TAG_BX_GTCGTAGCCGTT	55	A	C	98	12	84	A/C	0.1224	SNP
Lib10^3 1 ng	TAG_BX_GTCTAGTACGTA	69	T	C	75	15	59	T/C	0.2	SNP
Lib10^3 1 ng	TAG_BX_GTCTTAATGTCT	55	A	C	279	41	224	A/C	0.147	SNP
Lib10^3 1 ng	TAG_BX_GTCTTATTTAGC	69	T	C	160	30	122	T/C	0.1875	SNP
Lib10^3 1 ng	TAG_BX_GTCTTTAGTCGT	69	T	C	173	48	117	T/C	0.2775	SNP
Lib10^3 1 ng	TAG_BX_GTGAAAAATATC	55	A	C	188	30	145	A/C	0.1596	SNP
Lib10^3 1 ng	TAG_BX_GTGATGGATCGT	69	T	C	235	55	174	T/C	0.234	SNP
Lib10^3 1 ng	TAG_BX_GTGATGGGCTTC	69	T	C	172	39	128	T/C	0.2267	SNP
Lib10^3 1 ng	TAG_BX_GTGCATTTCCGT	55	A	C	20	4	14	A/C	0.2	SNP
Lib10^3 1 ng	TAG_BX_GTGCATTTCCGT	36	G	C	21	3	17	G/C	0.1429	SNP
Lib10^3 1 ng	TAG_BX_GTGCGTGGGTTC	69	T	C	243	54	178	T/C	0.2222	SNP
Lib10^3 1 ng	TAG_BX_GTGGACGTGCGC	69	T	C	279	64	205	T/C	0.2294	SNP
Lib10^3 1 ng	TAG_BX_GTGGCATGCGAT	69	T	C	176	36	130	T/C	0.2045	SNP
Lib10^3 1 ng	TAG_BX_GTGGGAAAGAGT	55	A	C	207	29	169	A/C	0.1401	SNP
Lib10^3 1 ng	TAG_BX_GTGGTCTGCTTC	69	T	C	262	55	197	T/C	0.2099	SNP
Lib10^3 1 ng	TAG_BX_GTGTACACCGTC	69	T	C	289	66	212	T/C	0.2284	SNP
Lib10^3 1 ng	TAG_BX_GTGTCCGCATGT	69	T	C	280	52	219	T/C	0.1857	SNP
Lib10^3 1 ng	TAG_BX_GTGTCTTTCCTG	69	T	C	284	64	212	T/C	0.2254	SNP
Lib10^3 1 ng	TAG_BX_GTGTGAGTTTGG	55	A	C	193	38	143	A/C	0.1969	SNP
Lib10^3 1 ng	TAG_BX_GTGTGTGGACGT	69	T	C	309	65	233	T/C	0.2104	SNP
Lib10^3 1 ng	TAG_BX_GTGTTCGTGATC	55	A	C	345	37	280	A/C	0.1072	SNP
Lib10^3 1 ng	TAG_BX_GTTAATTCATCA	55	A	C	230	31	188	A/C	0.1348	SNP
Lib10^3 1 ng	TAG_BX_GTTATTCGTTAT	69	T	C	258	67	182	T/C	0.2597	SNP
Lib10^3 1 ng	TAG_BX_GTTCTGCTTTCA	55	A	C	124	18	101	A/C	0.1452	SNP
Lib10^3 1 ng	TAG_BX_GTTGACGAGCGG	55	A	C	100	16	75	A/C	0.16	SNP
Lib10^3 1 ng	TAG_BX_GTTGACGAGCGG	69	T	C	100	20	73	T/C	0.2	SNP
Lib10^3 1 ng	TAG_BX_GTTGCCAGGCTA	55	A	C	347	56	271	A/C	0.1614	SNP
Lib10^3 1 ng	TAG_BX_GTTGCGGAAGGT	69	T	C	348	78	256	T/C	0.2241	SNP
Lib10^3 1 ng	TAG_BX_GTTGCTATCTGT	55	A	C	272	43	200	A/C	0.1581	SNP
Lib10^3 1 ng	TAG_BX_GTTGTATTTCTT	69	T	C	208	50	153	T/C	0.2404	SNP
Lib10^3 1 ng	TAG_BX_GTTTACGCAGCT	69	T	C	226	38	181	T/C	0.1681	SNP
Lib10^3 1 ng	TAG_BX_GTTTCCTTGCAG	69	T	C	206	43	154	T/C	0.2087	SNP
Lib10^3 1 ng	TAG_BX_GTTTGGTTTATT	52	A	T	28	5	20	A/T	0.1786	SNP
Lib10^3 1 ng	TAG_BX_GTTTGGTTTATT	52	A	C	28	3	20	A/C	0.1071	SNP
Lib10^3 1 ng	TAG_BX_GTTTGGTTTATT	35	A	G	28	5	22	A/G	0.1786	SNP
Lib10^3 1 ng	TAG_BX_GTTTGGTTTATT	68	T	C	28	4	24	T/C	0.1429	SNP
Lib10^3 1 ng	TAG_BX_GTTTGGTTTATT	55	A	C	28	3	23	A/C	0.1071	SNP
Lib10^3 1 ng	TAG_BX_GTTTTTACATGT	55	A	C	160	20	125	A/C	0.125	SNP
Lib10^3 1 ng	TAG_BX_TACGAATGCCTG	55	A	C	217	28	179	A/C	0.129	SNP
Lib10^3 1 ng	TAG_BX_TACGGCTTGGTT	69	T	C	294	60	226	T/C	0.2041	SNP
Lib10^3 1 ng	TAG_BX_TACGGGCGGGGA	69	T	C	210	39	162	T/C	0.1857	SNP
Lib10^3 1 ng	TAG_BX_TACTGCTATCGA	69	T	C	42	6	33	T/C	0.1429	SNP
Lib10^3 1 ng	TAG_BX_TACTGCTATCGA	55	A	C	42	5	37	A/C	0.119	SNP
Lib10^3 1 ng	TAG_BX_TACTGTGATCAG	69	T	C	200	43	147	T/C	0.215	SNP
Lib10^3 1 ng	TAG_BX_TAGGAGAATTTG	69	T	C	196	43	143	T/C	0.2194	SNP
Lib10^3 1 ng	TAG_BX_TAGGTTAGAATC	69	T	C	211	51	154	T/C	0.2417	SNP
Lib10^3 1 ng	TAG_BX_TAGTGAGGTATA	69	T	C	211	46	159	T/C	0.218	SNP
Lib10^3 1 ng	TAG_BX_TAGTGTAGTCCT	55	A	C	66	10	52	A/C	0.1515	SNP
Lib10^3 1 ng	TAG_BX_TAGTTCCGAGAA	69	T	C	203	43	150	T/C	0.2118	SNP
Lib10^3 1 ng	TAG_BX_TATAGGGTTACG	69	T	C	279	54	211	T/C	0.1935	SNP
Lib10^3 1 ng	TAG_BX_TATATACCTTAT	55	A	C	255	40	195	A/C	0.1569	SNP
Lib10^3 1 ng	TAG_BX_TATATACCTTAT	69	T	C	255	60	185	T/C	0.2353	SNP
Lib10^3 1 ng	TAG_BX_TATCATAAGTGT	69	T	C	301	63	223	T/C	0.2093	SNP
Lib10^3 1 ng	TAG_BX_TATGGTTTTTAT	69	T	C	58	13	43	T/C	0.2241	SNP
Lib10^3 1 ng	TAG_BX_TATGGTTTTTAT	60	T	G	58	6	50	T/G	0.1034	SNP
Lib10^3 1 ng	TAG_BX_TATTATTTTTCC	55	A	C	36	5	30	A/C	0.1389	SNP
Lib10^3 1 ng	TAG_BX_TATTCAGCGGAA	55	A	C	104	18	82	A/C	0.1731	SNP
Lib10^3 1 ng	TAG_BX_TATTGAACGTGA	55	A	C	214	28	164	A/C	0.1308	SNP
Lib10^3 1 ng	TAG_BX_TCAAATATGGTA	69	T	C	265	62	189	T/C	0.234	SNP
Lib10^3 1 ng	TAG_BX_TCAACCTTCATT	55	A	C	44	9	35	A/C	0.2045	SNP
Lib10^3 1 ng	TAG_BX_TCACATCGCTGC	69	T	C	202	39	153	T/C	0.1931	SNP
Lib10^3 1 ng	TAG_BX_TCAGATGATCTG	35	A	G	23	4	18	A/G	0.1739	SNP
Lib10^3 1 ng	TAG_BX_TCAGATGATCTG	69	T	A	23	3	14	T/A	0.1304	SNP
Lib10^3 1 ng	TAG_BX_TCAGCTAGTGGG	69	T	C	152	37	112	T/C	0.2434	SNP
Lib10^3 1 ng	TAG_BX_TCATCAGTCTAG	69	T	C	118	24	92	T/C	0.2034	SNP
Lib10^3 1 ng	TAG_BX_TCATGCGCCCTT	55	A	C	180	26	139	A/C	0.1444	SNP
Lib10^3 1 ng	TAG_BX_TCATGCGCCCTT	69	T	C	180	35	139	T/C	0.1944	SNP
Lib10^3 1 ng	TAG_BX_TCATTTAACCAC	69	T	C	124	28	93	T/C	0.2258	SNP
Lib10^3 1 ng	TAG_BX_TCCATGCACGCG	55	A	C	205	26	166	A/C	0.1268	SNP
Lib10^3 1 ng	TAG_BX_TCCCCTGGCCCT	69	T	C	189	40	139	T/C	0.2116	SNP
Lib10^3 1 ng	TAG_BX_TCCGGCGGATGG	69	T	C	714	151	535	T/C	0.2115	SNP
Lib10^3 1 ng	TAG_BX_TCCGGGCAGATT	55	A	C	212	28	172	A/C	0.1321	SNP
Lib10^3 1 ng	TAG_BX_TCCTGCCTCTGA	55	A	C	329	46	257	A/C	0.1398	SNP
Lib10^3 1 ng	TAG_BX_TCCTTCTTGGTT	69	T	C	192	40	149	T/C	0.2083	SNP
Lib10^3 1 ng	TAG_BX_TCCTTGTCTCTC	55	A	C	172	25	140	A/C	0.1453	SNP
Lib10^3 1 ng	TAG_BX_TCGCTCTGTGTG	69	T	C	228	44	172	T/C	0.193	SNP
Lib10^3 1 ng	TAG_BX_TCGCTGGCCCAC	55	A	C	326	44	263	A/C	0.135	SNP
Lib10^3 1 ng	TAG_BX_TCGCTTTCAGGC	69	T	C	252	47	197	T/C	0.1865	SNP
Lib10^3 1 ng	TAG_BX_TCGGGTCCCTTT	55	A	C	205	28	169	A/C	0.1366	SNP
Lib10^3 1 ng	TAG_BX_TCGGTCCCCGTT	69	T	C	225	48	166	T/C	0.2133	SNP
Lib10^3 1 ng	TAG_BX_TCGGTCTAAATC	69	T	C	51	9	40	T/C	0.1765	SNP
Lib10^3 1 ng	TAG_BX_TCGGTCTATTGG	52	A	C	46	5	37	A/C	0.1087	SNP
Lib10^3 1 ng	TAG_BX_TCGTTGCGCTCC	55	A	C	75	11	59	A/C	0.1467	SNP
Lib10^3 1 ng	TAG_BX_TCTAATTGCTAT	69	T	C	190	46	138	T/C	0.2421	SNP
Lib10^3 1 ng	TAG_BX_TCTATTGTTATG	69	T	C	291	74	206	T/C	0.2543	SNP
Lib10^3 1 ng	TAG_BX_TCTCAACTTTTG	69	T	C	166	24	135	T/C	0.1446	SNP
Lib10^3 1 ng	TAG_BX_TCTGATTGATGG	55	A	C	433	57	346	A/C	0.1316	SNP
Lib10^3 1 ng	TAG_BX_TCTGGTCGATCC	69	T	C	56	10	45	T/C	0.1786	SNP
Lib10^3 1 ng	TAG_BX_TCTGTAGTTCGT	69	T	C	195	28	162	T/C	0.1436	SNP
Lib10^3 1 ng	TAG_BX_TCTGTGTGTCCT	69	T	C	277	62	203	T/C	0.2238	SNP
Lib10^3 1 ng	TAG_BX_TCTTCGTTACGT	69	T	C	257	53	192	T/C	0.2062	SNP
Lib10^3 1 ng	TAG_BX_TCTTCTTCGGAG	55	A	C	250	36	209	A/C	0.144	SNP
Lib10^3 1 ng	TAG_BX_TCTTTACGGCAT	55	A	C	183	34	140	A/C	0.1858	SNP
Lib10^3 1 ng	TAG_BX_TGAAAAGAACGA	69	T	C	243	58	179	T/C	0.2387	SNP
Lib10^3 1 ng	TAG_BX_TGAACTTTGATA	69	T	C	197	35	155	T/C	0.1777	SNP
Lib10^3 1 ng	TAG_BX_TGAATGCTGGTA	69	T	C	318	47	255	T/C	0.1478	SNP
Lib10^3 1 ng	TAG_BX_TGAGTGTAGTTG	69	T	C	294	63	223	T/C	0.2143	SNP
Lib10^3 1 ng	TAG_BX_TGAGTGTAGTTG	55	A	C	294	42	239	A/C	0.1429	SNP
Lib10^3 1 ng	TAG_BX_TGATCCTTTTGT	69	T	C	188	36	144	T/C	0.1915	SNP
Lib10^3 1 ng	TAG_BX_TGATGGTGGCTA	69	T	C	260	51	198	T/C	0.1962	SNP
Lib10^3 1 ng	TAG_BX_TGATTATCTCCG	55	A	C	168	27	129	A/C	0.1607	SNP
Lib10^3 1 ng	TAG_BX_TGATTCTAGTTA	69	T	C	61	18	40	T/C	0.2951	SNP
Lib10^3 1 ng	TAG_BX_TGATTTCATGTA	69	T	C	111	24	85	T/C	0.2162	SNP
Lib10^3 1 ng	TAG_BX_TGCAATTTTACG	55	A	C	183	19	151	A/C	0.1038	SNP
Lib10^3 1 ng	TAG_BX_TGCCAGCCCATC	69	T	C	121	23	95	T/C	0.1901	SNP
Lib10^3 1 ng	TAG_BX_TGCCGGTTCAGT	69	T	C	267	52	198	T/C	0.1948	SNP
Lib10^3 1 ng	TAG_BX_TGCCTCGTTAGT	55	A	C	298	44	228	A/C	0.1477	SNP
Lib10^3 1 ng	TAG_BX_TGCCTGGTAACT	69	T	C	120	25	93	T/C	0.2083	SNP
Lib10^3 1 ng	TAG_BX_TGCGGAAAGAGT	55	A	C	35	5	30	A/C	0.1429	SNP
Lib10^3 1 ng	TAG_BX_TGCGGAAAGAGT	69	T	C	35	5	27	T/C	0.1429	SNP
Lib10^3 1 ng	TAG_BX_TGCGGATGTGAT	55	A	C	264	29	213	A/C	0.1098	SNP
Lib10^3 1 ng	TAG_BX_TGCGGATGTGAT	69	T	C	264	61	187	T/C	0.2311	SNP
Lib10^3 1 ng	TAG_BX_TGCGTGGCCTGT	55	A	C	77	8	61	A/C	0.1039	SNP
Lib10^3 1 ng	TAG_BX_TGCTACTTTGCC	69	T	C	101	25	68	T/C	0.2475	SNP
Lib10^3 1 ng	TAG_BX_TGCTATTGTGCT	55	A	C	250	31	202	A/C	0.124	SNP
Lib10^3 1 ng	TAG_BX_TGCTGCATAGGG	69	T	C	155	32	115	T/C	0.2065	SNP
Lib10^3 1 ng	TAG_BX_TGCTGCTTCGTG	55	A	C	446	56	361	A/C	0.1256	SNP
Lib10^3 1 ng	TAG_BX_TGCTGGCGTTGA	69	T	C	268	60	195	T/C	0.2239	SNP
Lib10^3 1 ng	TAG_BX_TGCTTATTTGAT	69	T	C	105	20	81	T/C	0.1905	SNP
Lib10^3 1 ng	TAG_BX_TGCTTTTTGTAG	69	T	C	195	41	146	T/C	0.2103	SNP
Lib10^3 1 ng	TAG_BX_TGGAATTTGTAT	69	T	C	222	45	167	T/C	0.2027	SNP
Lib10^3 1 ng	TAG_BX_TGGAATTTGTAT	55	A	C	223	27	183	A/C	0.1211	SNP
Lib10^3 1 ng	TAG_BX_TGGAGCTGTCTT	69	T	C	63	23	39	T/C	0.3651	SNP
Lib10^3 1 ng	TAG_BX_TGGATTTGCAGA	55	A	C	285	38	230	A/C	0.1333	SNP
Lib10^3 1 ng	TAG_BX_TGGCCCCATTTT	69	T	C	139	25	103	T/C	0.1799	SNP
Lib10^3 1 ng	TAG_BX_TGGCTCGCATTT	69	T	C	256	62	188	T/C	0.2422	SNP
Lib10^3 1 ng	TAG_BX_TGGGGACTTTCG	55	A	C	243	31	193	A/C	0.1276	SNP
Lib10^3 1 ng	TAG_BX_TGGGGAGGATGG	69	T	C	243	48	189	T/C	0.1975	SNP
Lib10^3 1 ng	TAG_BX_TGGGGGGTCTCC	55	A	C	200	29	158	A/C	0.145	SNP
Lib10^3 1 ng	TAG_BX_TGGGGGTGACTT	55	A	C	242	30	198	A/C	0.124	SNP
Lib10^3 1 ng	TAG_BX_TGGGGTTTGAGG	55	A	C	127	23	96	A/C	0.1811	SNP
Lib10^3 1 ng	TAG_BX_TGGGTTATTTCG	69	T	C	193	35	149	T/C	0.1813	SNP
Lib10^3 1 ng	TAG_BX_TGGTAGGTGGTT	55	A	C	201	24	172	A/C	0.1194	SNP
Lib10^3 1 ng	TAG_BX_TGGTGTGCCACT	69	T	C	398	73	306	T/C	0.1834	SNP
Lib10^3 1 ng	TAG_BX_TGTAACTGTGCT	69	T	C	276	74	186	T/C	0.2681	SNP
Lib10^3 1 ng	TAG_BX_TGTACACAGCAT	69	T	C	163	30	126	T/C	0.184	SNP
Lib10^3 1 ng	TAG_BX_TGTCATGGACGG	55	A	C	157	24	125	A/C	0.1529	SNP
Lib10^3 1 ng	TAG_BX_TGTCCGTGGCAG	69	T	C	168	36	123	T/C	0.2143	SNP
Lib10^3 1 ng	TAG_BX_TGTCCTACTTGT	69	T	C	218	56	154	T/C	0.2569	SNP
Lib10^3 1 ng	TAG_BX_TGTCCTACTTGT	55	A	C	217	33	168	A/C	0.1521	SNP
Lib10^3 1 ng	TAG_BX_TGTGAAAGGCTT	69	T	C	184	36	141	T/C	0.1957	SNP
Lib10^3 1 ng	TAG_BX_TGTGATGAATAT	63	T	G	57	8	46	T/G	0.1404	SNP
Lib10^3 1 ng	TAG_BX_TGTGATGAATAT	38	A	G	57	6	48	A/G	0.1053	SNP
Lib10^3 1 ng	TAG_BX_TGTGATGAATAT	69	T	C	57	17	38	T/C	0.2982	SNP
Lib10^3 1 ng	TAG_BX_TGTGCAACTCAT	55	A	C	123	15	103	A/C	0.122	SNP
Lib10^3 1 ng	TAG_BX_TGTGCTAATTGG	69	T	C	344	75	246	T/C	0.218	SNP
Lib10^3 1 ng	TAG_BX_TGTGGTTTTACT	69	T	C	217	58	148	T/C	0.2673	SNP
Lib10^3 1 ng	TAG_BX_TGTGTGAAATAT	69	T	C	236	55	169	T/C	0.2331	SNP
Lib10^3 1 ng	TAG_BX_TGTGTTTTTTTT	55	A	C	78	16	55	A/C	0.2051	SNP
Lib10^3 1 ng	TAG_BX_TGTTGATTACTT	69	T	C	138	37	96	T/C	0.2681	SNP
Lib10^3 1 ng	TAG_BX_TGTTTGTTAGTG	55	A	C	264	31	219	A/C	0.1174	SNP
Lib10^3 1 ng	TAG_BX_TGTTTTAAGGAC	55	A	C	296	37	239	A/C	0.125	SNP
Lib10^3 1 ng	TAG_BX_TTAAGTTATTAG	69	T	C	175	36	132	T/C	0.2057	SNP
Lib10^3 1 ng	TAG_BX_TTAATTAGGAAT	55	A	C	206	27	164	A/C	0.1311	SNP
Lib10^3 1 ng	TAG_BX_TTAATTTGTCCG	69	T	C	149	36	109	T/C	0.2416	SNP
Lib10^3 1 ng	TAG_BX_TTACCACCGAGA	69	T	C	331	68	258	T/C	0.2054	SNP
Lib10^3 1 ng	TAG_BX_TTACTTAGCAGG	69	T	C	225	48	173	T/C	0.2133	SNP
Lib10^3 1 ng	TAG_BX_TTACTTAGCAGG	55	A	C	225	30	182	A/C	0.1333	SNP
Lib10^3 1 ng	TAG_BX_TTAGGGAACTTC	69	T	C	150	33	113	T/C	0.22	SNP
Lib10^3 1 ng	TAG_BX_TTAGTGTAGCTT	69	T	C	331	80	240	T/C	0.2417	SNP
Lib10^3 1 ng	TAG_BX_TTATTGTGGGGT	55	A	C	150	30	110	A/C	0.2	SNP
Lib10^3 1 ng	TAG_BX_TTATTTGTCGGC	69	T	C	181	33	141	T/C	0.1823	SNP
Lib10^3 1 ng	TAG_BX_TTCATCAACTCC	69	T	C	301	56	236	T/C	0.186	SNP
Lib10^3 1 ng	TAG_BX_TTCCCTCGTAAC	69	T	C	87	25	61	T/C	0.2874	SNP
Lib10^3 1 ng	TAG_BX_TTCCGTCTGGGG	69	T	C	45	10	33	T/C	0.2222	SNP
Lib10^3 1 ng	TAG_BX_TTCCTGGCTTTT	55	A	C	57	8	47	A/C	0.1404	SNP
Lib10^3 1 ng	TAG_BX_TTCGCATTGTGG	40	G	C	41	5	36	G/C	0.122	SNP
Lib10^3 1 ng	TAG_BX_TTCGCATTGTGG	69	T	C	41	8	33	T/C	0.1951	SNP
Lib10^3 1 ng	TAG_BX_TTCGGCTAACGG	55	A	C	124	23	92	A/C	0.1855	SNP
Lib10^3 1 ng	TAG_BX_TTCGGCTAACGG	69	T	C	124	35	85	T/C	0.2823	SNP
Lib10^3 1 ng	TAG_BX_TTCGTTTTTTGT	55	A	C	204	25	162	A/C	0.1225	SNP
Lib10^3 1 ng	TAG_BX_TTCGTTTTTTGT	69	T	C	204	42	152	T/C	0.2059	SNP
Lib10^3 1 ng	TAG_BX_TTCTCCTATGAT	55	A	C	221	33	174	A/C	0.1493	SNP
Lib10^3 1 ng	TAG_BX_TTCTGGAACTTC	55	A	C	114	17	86	A/C	0.1491	SNP
Lib10^3 1 ng	TAG_BX_TTCTGGAACTTC	69	T	C	114	16	93	T/C	0.1404	SNP
Lib10^3 1 ng	TAG_BX_TTGAATCCGGTG	69	T	C	239	43	191	T/C	0.1799	SNP
Lib10^3 1 ng	TAG_BX_TTGAATCTTGAT	55	A	C	223	29	184	A/C	0.13	SNP
Lib10^3 1 ng	TAG_BX_TTGACGTTGTTC	38	A	G	80	9	66	A/G	0.1125	SNP
Lib10^3 1 ng	TAG_BX_TTGACGTTGTTC	69	T	C	80	16	61	T/C	0.2	SNP
Lib10^3 1 ng	TAG_BX_TTGAGCCGATGT	55	A	C	216	24	181	A/C	0.1111	SNP
Lib10^3 1 ng	TAG_BX_TTGAGCCGATGT	69	T	C	216	50	161	T/C	0.2315	SNP
Lib10^3 1 ng	TAG_BX_TTGAGTTGTGTG	69	T	C	295	59	232	T/C	0.2	SNP
Lib10^3 1 ng	TAG_BX_TTGATGACCACT	55	A	C	42	9	30	A/C	0.2143	SNP
Lib10^3 1 ng	TAG_BX_TTGATGACCACT	40	G	C	42	6	36	G/C	0.1429	SNP
Lib10^3 1 ng	TAG_BX_TTGATGGATAGG	69	T	C	203	51	145	T/C	0.2512	SNP
Lib10^3 1 ng	TAG_BX_TTGCAAGGCATT	69	T	C	300	50	237	T/C	0.1667	SNP
Lib10^3 1 ng	TAG_BX_TTGCAGGTTGAT	55	A	C	179	19	153	A/C	0.1061	SNP
Lib10^3 1 ng	TAG_BX_TTGCTTGAAGAT	60	T	G	69	10	57	T/G	0.1449	SNP
Lib10^3 1 ng	TAG_BX_TTGTTCTTTGAG	69	T	C	128	37	87	T/C	0.2891	SNP
Lib10^3 1 ng	TAG_BX_TTGTTGACGGCA	69	T	C	500	107	369	T/C	0.214	SNP
Lib10^3 1 ng	TAG_BX_TTTACGTGGCAG	69	T	C	111	28	78	T/C	0.2523	SNP
Lib10^3 1 ng	TAG_BX_TTTCACACCCGG	69	T	C	273	54	201	T/C	0.1978	SNP
Lib10^3 1 ng	TAG_BX_TTTCCCGCGACA	69	T	C	185	37	140	T/C	0.2	SNP
Lib10^3 1 ng	TAG_BX_TTTCCTCTTTCA	55	A	C	213	30	174	A/C	0.1408	SNP
Lib10^3 1 ng	TAG_BX_TTTCCTCTTTCA	69	T	C	213	40	163	T/C	0.1878	SNP
Lib10^3 1 ng	TAG_BX_TTTCTCCGGTCT	69	T	C	189	35	147	T/C	0.1852	SNP
Lib10^3 1 ng	TAG_BX_TTTCTGGTGATG	55	A	C	242	30	195	A/C	0.124	SNP
Lib10^3 1 ng	TAG_BX_TTTCTTATGGTC	55	A	C	247	35	196	A/C	0.1417	SNP
Lib10^3 1 ng	TAG_BX_TTTGCAACTTTA	69	T	C	156	36	112	T/C	0.2308	SNP
Lib10^3 1 ng	TAG_BX_TTTGGAGGGTCA	55	A	C	192	22	154	A/C	0.1146	SNP
Lib10^3 1 ng	TAG_BX_TTTGGAGGGTCA	69	T	C	192	39	147	T/C	0.2031	SNP
Lib10^3 1 ng	TAG_BX_TTTGTTGCTAGT	55	A	C	95	14	77	A/C	0.1474	SNP
Lib10^3 1 ng	TAG_BX_TTTTAATACGGG	55	A	C	237	35	188	A/C	0.1477	SNP
Lib10^3 1 ng	TAG_BX_TTTTAGTTTGAG	69	T	C	179	44	126	T/C	0.2458	SNP
Lib10^3 1 ng	TAG_BX_TTTTATACATTT	69	T	C	208	33	169	T/C	0.1587	SNP
Lib10^3 1 ng	TAG_BX_TTTTCTCCTCCA	69	T	C	34	6	27	T/C	0.1765	SNP
Lib10^3 1 ng	TAG_BX_TTTTGGTAGGTC	69	T	C	315	66	238	T/C	0.2095	SNP
Lib10^3 1 ng	TAG_BX_TTTTGGTTGTGG	55	A	C	185	28	143	A/C	0.1514	SNP
Lib10^3 1 ng	TAG_BX_TTTTGTTGGGAT	55	A	C	303	48	235	A/C	0.1584	SNP
Lib10^3 1 ng	TAG_BX_TTTTGTTTGCTC	69	T	C	230	58	167	T/C	0.2522	SNP
Lib10^3 1 ng	TAG_BX_TTTTTGCTAAGT	69	T	C	114	23	87	T/C	0.2018	SNP
Lib10^3 1 ng	TAG_BX_TTTTTGTATTGG	69	T	C	174	42	127	T/C	0.2414	SNP
Lib10^3 1 ng	TAG_BX_TTTTTGTATTGG	55	A	C	174	19	140	A/C	0.1092	SNP
Lib10^3 1 ng	TAG_BX_TTTTTTTTCCAA	55	A	C	213	32	167	A/C	0.1502	SNP
Lib10^3 1 ng	TAG_BX_ATTGGTAGTCGC	-69	T		70	61	8	T/	0.8714	1Del
Lib10^3 1 ng	TAG_BX_CGGTTCGCCTTC	-62	CTT		117	115	1	CTT/	0.9829	Del
Lib10^3 1 ng	TAG_BX_CGTACGAATGCC	-69	T		97	83	12	T/	0.8557	1Del
Lib10^3 1 ng	TAG_BX_TAGTGTGTAGCT	-72	GAATTGCAA		91	13	78	GAATTGCAA/	0.1429	Del
Lib10^3 1 ng	TAG_BX_TCGCGTTCTCCT	-57	A		239	237	0	A/	0.9916	1Del
Lib10^3 1 ng	TAG_BX_TGCGGAAAGAGT	-57	AG		35	35	0	AG/	1	Del
Lib10^3 1 ng	TAG_BX_TTAAGTGGATTA	-69	T		143	132	9	T/	0.9231	1Del
Lib10^3 1 ng	TAG_BX_TTCCTTGTTGTT	-26	A		277	109	168	A/	0.3935	1Del
Lib10^3 1 ng	TAG_BX_TTCTTTGTCGGT	-66	CAA		160	157	2	CAA/	0.9812	Del
Lib10^3 1 ng	TAG_BX_TTGAGTTTGACT	-28	T		239	64	175	T/	0.2678	1Del
Lib10^3 1 ng	TAG_BX_TTGATGACCACT	-67	GCAA		42	35	7	GCAA/	0.8333	Del
Lib10^3 1 ng	TAG_BX_TTTCCGATCGGG	-63	G		360	356	3	G/	0.9889	1Del
Lib10^4 1 ng	TAG_BX_AACTAACTCAAT	-67	G	GC	93	88	3	G/GC	0.9462	Ins
Lib10^4 1 ng	TAG_BX_AGTGGTGGGTAT	-67	G	GC	86	82	4	G/GC	0.9535	Ins
Lib10^4 1 ng	TAG_BX_CAGGTGCCCGTG	-62	C	CT	78	78	0	C/CT	1	Ins
Lib10^4 1 ng	TAG_BX_CGCTTGTGCTAC	-42	A	AT	72	72	0	A/AT	1	Ins
Lib10^4 1 ng	TAG_BX_CTCTGTGCTTTG	-70	A	AT	134	123	10	A/AT	0.9179	Ins
Lib10^4 1 ng	TAG_BX_CTTTCTGGGATC	-70	A	AT	142	127	15	A/AT	0.8944	Ins
Lib10^4 1 ng	TAG_BX_GATATATGTGAG	-30	T	TC	109	105	3	T/TC	0.9633	Ins
Lib10^4 1 ng	TAG_BX_TACATGTCCATA	-57	A	AG	80	80	0	A/AG	1	Ins
Lib10^4 1 ng	TAG_BX_TGGTACTAATTT	-57	A	AG	149	148	1	A/AG	0.9933	Ins
Lib10^4 1 ng	TAG_BX_AAAAAGTGTTAA	55	A	C	67	8	55	A/C	0.1194	SNP
Lib10^4 1 ng	TAG_BX_AAAAAGTTCTGG	69	T	C	130	23	102	T/C	0.1769	SNP
Lib10^4 1 ng	TAG_BX_AAAAAGTTCTGG	55	A	C	130	23	101	A/C	0.1769	SNP
Lib10^4 1 ng	TAG_BX_AAAACTTTAAAC	69	T	C	94	15	75	T/C	0.1596	SNP
Lib10^4 1 ng	TAG_BX_AAAACTTTAAAC	55	A	C	94	14	78	A/C	0.1489	SNP
Lib10^4 1 ng	TAG_BX_AAAAGTGGTGTC	69	T	C	178	38	134	T/C	0.2135	SNP
Lib10^4 1 ng	TAG_BX_AAAAGTGTTGTA	69	T	C	200	47	142	T/C	0.235	SNP
Lib10^4 1 ng	TAG_BX_AAAATTGGGCCA	69	T	C	149	38	104	T/C	0.255	SNP
Lib10^4 1 ng	TAG_BX_AAACAGGTATTC	69	T	C	42	6	32	T/C	0.1429	SNP
Lib10^4 1 ng	TAG_BX_AAACGTTCTGAG	55	A	C	105	11	84	A/C	0.1048	SNP
Lib10^4 1 ng	TAG_BX_AAACGTTCTGAG	69	T	C	105	20	81	T/C	0.1905	SNP
Lib10^4 1 ng	TAG_BX_AAACGTTCTGAG	60	T	G	105	13	84	T/G	0.1238	SNP
Lib10^4 1 ng	TAG_BX_AAACTAAAAGTT	52	A	C	54	6	43	A/C	0.1111	SNP
Lib10^4 1 ng	TAG_BX_AAACTACGGACG	69	T	C	147	28	110	T/C	0.1905	SNP
Lib10^4 1 ng	TAG_BX_AAACTTTATAGG	69	T	C	121	34	85	T/C	0.281	SNP
Lib10^4 1 ng	TAG_BX_AAAGATTGTTGT	55	A	C	117	20	89	A/C	0.1709	SNP
Lib10^4 1 ng	TAG_BX_AAAGCACTGTTT	69	T	C	110	27	80	T/C	0.2455	SNP
Lib10^4 1 ng	TAG_BX_AAAGCGCGTACA	69	T	C	85	21	61	T/C	0.2471	SNP
Lib10^4 1 ng	TAG_BX_AAAGCTTTTTCT	55	A	C	63	15	46	A/C	0.2381	SNP
Lib10^4 1 ng	TAG_BX_AAAGGGGCGAGT	55	A	C	70	13	48	A/C	0.1857	SNP
Lib10^4 1 ng	TAG_BX_AAAGGTTTTGGC	55	A	C	88	15	70	A/C	0.1705	SNP
Lib10^4 1 ng	TAG_BX_AAATAGCTGCAG	55	A	C	107	17	83	A/C	0.1589	SNP
Lib10^4 1 ng	TAG_BX_AAATATTTTTAT	69	T	C	71	23	45	T/C	0.3239	SNP
Lib10^4 1 ng	TAG_BX_AAATCATATATG	69	T	C	79	19	59	T/C	0.2405	SNP
Lib10^4 1 ng	TAG_BX_AAATCCTAGATA	58	T	G	50	6	42	T/G	0.12	SNP
Lib10^4 1 ng	TAG_BX_AAATCCTAGATA	69	T	C	50	13	36	T/C	0.26	SNP
Lib10^4 1 ng	TAG_BX_AAATCGATATAC	69	T	C	83	16	65	T/C	0.1928	SNP
Lib10^4 1 ng	TAG_BX_AAATCGATATAC	55	A	C	83	15	63	A/C	0.1807	SNP
Lib10^4 1 ng	TAG_BX_AAATCTTGACTC	55	A	C	51	10	36	A/C	0.1961	SNP
Lib10^4 1 ng	TAG_BX_AAATGGAGGCCG	55	A	C	168	30	130	A/C	0.1786	SNP
Lib10^4 1 ng	TAG_BX_AACAAATCGACA	55	A	C	104	15	81	A/C	0.1442	SNP
Lib10^4 1 ng	TAG_BX_AACACGAGAGTC	55	A	C	132	18	108	A/C	0.1364	SNP
Lib10^4 1 ng	TAG_BX_AACACGTTTACG	69	T	C	142	27	112	T/C	0.1901	SNP
Lib10^4 1 ng	TAG_BX_AACAGTGGGCGA	69	T	C	127	22	99	T/C	0.1732	SNP
Lib10^4 1 ng	TAG_BX_AACATGAGGGGT	69	T	C	139	29	105	T/C	0.2086	SNP
Lib10^4 1 ng	TAG_BX_AACATGGTGCTG	55	A	C	130	17	106	A/C	0.1308	SNP
Lib10^4 1 ng	TAG_BX_AACATGGTGCTG	69	T	C	130	23	102	T/C	0.1769	SNP
Lib10^4 1 ng	TAG_BX_AACCAAGGTGTA	58	T	G	48	6	37	T/G	0.125	SNP
Lib10^4 1 ng	TAG_BX_AACCAAGGTGTA	69	T	C	48	9	36	T/C	0.1875	SNP
Lib10^4 1 ng	TAG_BX_AACCACGGGCGA	69	T	C	189	29	153	T/C	0.1534	SNP
Lib10^4 1 ng	TAG_BX_AACCCCTAGCTA	55	A	C	85	16	63	A/C	0.1882	SNP
Lib10^4 1 ng	TAG_BX_AACCCTTAAAGG	55	A	C	105	16	78	A/C	0.1524	SNP
Lib10^4 1 ng	TAG_BX_AACCGGCGTCCC	69	T	C	124	25	94	T/C	0.2016	SNP
Lib10^4 1 ng	TAG_BX_AACCGGCGTCCC	55	A	C	124	17	99	A/C	0.1371	SNP
Lib10^4 1 ng	TAG_BX_AACCTGTAGTTC	55	A	C	115	17	85	A/C	0.1478	SNP
Lib10^4 1 ng	TAG_BX_AACCTTCTTCAT	55	A	C	257	35	204	A/C	0.1362	SNP
Lib10^4 1 ng	TAG_BX_AACCTTTTAAAG	55	A	C	107	15	84	A/C	0.1402	SNP
Lib10^4 1 ng	TAG_BX_AACGAAGGAATC	55	A	C	151	19	122	A/C	0.1258	SNP
Lib10^4 1 ng	TAG_BX_AACGACAGCTGG	69	T	C	130	22	105	T/C	0.1692	SNP
Lib10^4 1 ng	TAG_BX_AACGCACGCGCT	69	T	C	113	21	87	T/C	0.1858	SNP
Lib10^4 1 ng	TAG_BX_AACGCTGCGCCC	69	T	C	173	46	124	T/C	0.2659	SNP
Lib10^4 1 ng	TAG_BX_AACGGCAGTCTT	69	T	C	142	29	108	T/C	0.2042	SNP
Lib10^4 1 ng	TAG_BX_AACGGCTAACTG	69	T	C	116	16	99	T/C	0.1379	SNP
Lib10^4 1 ng	TAG_BX_AACGGTCCTGTG	55	A	C	163	25	132	A/C	0.1534	SNP
Lib10^4 1 ng	TAG_BX_AACGTTAGGTAA	55	A	C	137	17	111	A/C	0.1241	SNP
Lib10^4 1 ng	TAG_BX_AACGTTAGGTAA	69	T	C	137	28	105	T/C	0.2044	SNP
Lib10^4 1 ng	TAG_BX_AACTAACTCAAT	69	T	C	93	17	71	T/C	0.1828	SNP
Lib10^4 1 ng	TAG_BX_AACTAGATTATG	55	A	C	91	10	77	A/C	0.1099	SNP
Lib10^4 1 ng	TAG_BX_AACTATAATATT	55	A	C	66	12	50	A/C	0.1818	SNP
Lib10^4 1 ng	TAG_BX_AACTATCGTACC	69	T	C	183	36	141	T/C	0.1967	SNP
Lib10^4 1 ng	TAG_BX_AACTATTCTGGT	69	T	C	60	14	39	T/C	0.2333	SNP
Lib10^4 1 ng	TAG_BX_AACTCATGTTAG	69	T	C	131	33	94	T/C	0.2519	SNP
Lib10^4 1 ng	TAG_BX_AACTCTTACTTA	55	A	C	141	26	106	A/C	0.1844	SNP
Lib10^4 1 ng	TAG_BX_AACTGGGATAAC	69	T	C	115	26	83	T/C	0.2261	SNP
Lib10^4 1 ng	TAG_BX_AACTGGTCCACT	55	A	C	180	23	148	A/C	0.1278	SNP
Lib10^4 1 ng	TAG_BX_AACTGTCGTTGC	69	T	C	216	45	163	T/C	0.2083	SNP
Lib10^4 1 ng	TAG_BX_AACTTATACTAG	55	A	C	72	10	58	A/C	0.1389	SNP
Lib10^4 1 ng	TAG_BX_AACTTCGCCTGA	60	T	G	126	15	106	T/G	0.119	SNP
Lib10^4 1 ng	TAG_BX_AACTTGGGGTAT	69	T	C	66	13	52	T/C	0.197	SNP
Lib10^4 1 ng	TAG_BX_AACTTTTGGTGC	69	T	C	192	48	136	T/C	0.25	SNP
Lib10^4 1 ng	TAG_BX_AACTTTTGGTGC	55	A	C	192	31	147	A/C	0.1615	SNP
Lib10^4 1 ng	TAG_BX_AAGACTCTCGGC	55	A	C	95	18	69	A/C	0.1895	SNP
Lib10^4 1 ng	TAG_BX_AAGACTCTCGGC	69	T	C	95	18	69	T/C	0.1895	SNP
Lib10^4 1 ng	TAG_BX_AAGAGCAACGCC	55	A	C	102	11	83	A/C	0.1078	SNP
Lib10^4 1 ng	TAG_BX_AAGATTTCGCTC	55	A	C	172	24	131	A/C	0.1395	SNP
Lib10^4 1 ng	TAG_BX_AAGCAAGACGTA	69	T	C	58	13	41	T/C	0.2241	SNP
Lib10^4 1 ng	TAG_BX_AAGCATGATATG	69	T	C	129	31	94	T/C	0.2403	SNP
Lib10^4 1 ng	TAG_BX_AAGCATTAATTG	55	A	C	110	15	87	A/C	0.1364	SNP
Lib10^4 1 ng	TAG_BX_AAGCATTTTGGC	69	T	C	140	30	106	T/C	0.2143	SNP
Lib10^4 1 ng	TAG_BX_AAGCGGCATAAT	69	T	C	132	28	101	T/C	0.2121	SNP
Lib10^4 1 ng	TAG_BX_AAGCGTATAATT	69	T	C	113	20	88	T/C	0.177	SNP
Lib10^4 1 ng	TAG_BX_AAGCGTATCAGC	69	T	C	141	32	102	T/C	0.227	SNP
Lib10^4 1 ng	TAG_BX_AAGCGTTGTTTT	69	T	C	88	15	69	T/C	0.1705	SNP
Lib10^4 1 ng	TAG_BX_AAGCTTGGACGG	55	A	C	173	21	145	A/C	0.1214	SNP
Lib10^4 1 ng	TAG_BX_AAGGAGACTATA	69	T	C	208	39	160	T/C	0.1875	SNP
Lib10^4 1 ng	TAG_BX_AAGGATCAGAGG	69	T	C	147	26	114	T/C	0.1769	SNP
Lib10^4 1 ng	TAG_BX_AAGGCAAGAGGA	69	T	C	145	29	111	T/C	0.2	SNP
Lib10^4 1 ng	TAG_BX_AAGGCAAGAGGA	55	A	C	145	23	114	A/C	0.1586	SNP
Lib10^4 1 ng	TAG_BX_AAGGCCGTATGG	55	A	C	272	33	219	A/C	0.1213	SNP
Lib10^4 1 ng	TAG_BX_AAGGCGGTGTTT	69	T	C	297	76	212	T/C	0.2559	SNP
Lib10^4 1 ng	TAG_BX_AAGGCTGTTGCT	55	A	C	195	29	158	A/C	0.1487	SNP
Lib10^4 1 ng	TAG_BX_AAGGGCTATCCG	69	T	C	47	10	34	T/C	0.2128	SNP
Lib10^4 1 ng	TAG_BX_AAGGGCTGAGAT	55	A	C	59	8	47	A/C	0.1356	SNP
Lib10^4 1 ng	TAG_BX_AAGGGGCAAGTA	69	T	C	73	12	56	T/C	0.1644	SNP
Lib10^4 1 ng	TAG_BX_AAGGGGTCCGTT	55	A	C	107	12	86	A/C	0.1121	SNP
Lib10^4 1 ng	TAG_BX_AAGGGGTGAGGC	55	A	C	151	18	128	A/C	0.1192	SNP
Lib10^4 1 ng	TAG_BX_AAGGTACTTGGG	55	A	C	78	9	61	A/C	0.1154	SNP
Lib10^4 1 ng	TAG_BX_AAGGTCCTCCTT	50	G	C	103	11	91	G/C	0.1068	SNP
Lib10^4 1 ng	TAG_BX_AAGGTCTATGTA	55	A	C	141	18	116	A/C	0.1277	SNP
Lib10^4 1 ng	TAG_BX_AAGGTGGCCCAT	55	A	C	126	18	101	A/C	0.1429	SNP
Lib10^4 1 ng	TAG_BX_AAGTAGTTTAGT	69	T	C	130	19	101	T/C	0.1462	SNP
Lib10^4 1 ng	TAG_BX_AAGTAGTTTAGT	55	A	C	130	14	110	A/C	0.1077	SNP
Lib10^4 1 ng	TAG_BX_AAGTATCGAGAA	55	A	C	103	13	85	A/C	0.1262	SNP
Lib10^4 1 ng	TAG_BX_AAGTCAATGCAC	69	T	C	148	26	114	T/C	0.1757	SNP
Lib10^4 1 ng	TAG_BX_AAGTCCCCTCTG	69	T	C	193	32	144	T/C	0.1658	SNP
Lib10^4 1 ng	TAG_BX_AAGTGACTGCAT	69	T	C	42	13	28	T/C	0.3095	SNP
Lib10^4 1 ng	TAG_BX_AAGTGACTGCAT	55	A	C	42	7	32	A/C	0.1667	SNP
Lib10^4 1 ng	TAG_BX_AAGTGAGCATGT	55	A	C	131	16	107	A/C	0.1221	SNP
Lib10^4 1 ng	TAG_BX_AAGTGGACAATC	69	T	C	99	17	78	T/C	0.1717	SNP
Lib10^4 1 ng	TAG_BX_AAGTGGTCCAGG	69	T	C	66	10	54	T/C	0.1515	SNP
Lib10^4 1 ng	TAG_BX_AAGTGGTTCATT	69	T	C	142	32	106	T/C	0.2254	SNP
Lib10^4 1 ng	TAG_BX_AAGTGTCCAATT	68	T	C	47	5	38	T/C	0.1064	SNP
Lib10^4 1 ng	TAG_BX_AAGTGTGTTGAG	69	T	C	179	39	132	T/C	0.2179	SNP
Lib10^4 1 ng	TAG_BX_AAGTGTTATTGA	69	T	C	111	25	84	T/C	0.2252	SNP
Lib10^4 1 ng	TAG_BX_AAGTGTTTTGTT	55	A	C	112	20	87	A/C	0.1786	SNP
Lib10^4 1 ng	TAG_BX_AAGTTAAAGTTG	69	T	C	136	24	106	T/C	0.1765	SNP
Lib10^4 1 ng	TAG_BX_AAGTTAGGGCGT	69	T	C	144	37	95	T/C	0.2569	SNP
Lib10^4 1 ng	TAG_BX_AAGTTATATACA	55	A	C	90	12	72	A/C	0.1333	SNP
Lib10^4 1 ng	TAG_BX_AAGTTCCTCGTA	55	A	C	159	26	125	A/C	0.1635	SNP
Lib10^4 1 ng	TAG_BX_AAGTTCCTGGGC	55	A	C	179	23	147	A/C	0.1285	SNP
Lib10^4 1 ng	TAG_BX_AAGTTTGTCCGC	55	A	C	94	17	73	A/C	0.1809	SNP
Lib10^4 1 ng	TAG_BX_AAGTTTGTTGTT	69	T	C	136	33	97	T/C	0.2426	SNP
Lib10^4 1 ng	TAG_BX_AATAAATTGGGC	55	A	C	147	26	110	A/C	0.1769	SNP
Lib10^4 1 ng	TAG_BX_AATAAATTGGTT	55	A	C	107	14	86	A/C	0.1308	SNP
Lib10^4 1 ng	TAG_BX_AATAATGTAGGG	69	T	C	129	35	91	T/C	0.2713	SNP
Lib10^4 1 ng	TAG_BX_AATACACGCCGG	55	A	C	153	26	118	A/C	0.1699	SNP
Lib10^4 1 ng	TAG_BX_AATACCTCACCA	55	A	C	89	11	73	A/C	0.1236	SNP
Lib10^4 1 ng	TAG_BX_AATAGAGGACTT	55	A	C	112	17	84	A/C	0.1518	SNP
Lib10^4 1 ng	TAG_BX_AATAGAGGACTT	69	T	C	112	21	87	T/C	0.1875	SNP
Lib10^4 1 ng	TAG_BX_AATAGCATTTGT	69	T	C	132	31	99	T/C	0.2348	SNP
Lib10^4 1 ng	TAG_BX_AATAGGAACACC	55	A	C	77	14	57	A/C	0.1818	SNP
Lib10^4 1 ng	TAG_BX_AATAGGATAGTG	69	T	C	127	25	98	T/C	0.1969	SNP
Lib10^4 1 ng	TAG_BX_AATAGGCGTGCC	69	T	C	184	42	131	T/C	0.2283	SNP
Lib10^4 1 ng	TAG_BX_AATAGTTCACTG	55	A	C	172	22	135	A/C	0.1279	SNP
Lib10^4 1 ng	TAG_BX_AATATATGTTTG	69	T	C	83	22	58	T/C	0.2651	SNP
Lib10^4 1 ng	TAG_BX_AATATCGTGGGT	55	A	C	109	14	86	A/C	0.1284	SNP
Lib10^4 1 ng	TAG_BX_AATATCTATCTC	55	A	C	86	10	70	A/C	0.1163	SNP
Lib10^4 1 ng	TAG_BX_AATATCTATCTC	69	T	C	86	15	69	T/C	0.1744	SNP
Lib10^4 1 ng	TAG_BX_AATATCTGTCGA	69	T	C	209	34	167	T/C	0.1627	SNP
Lib10^4 1 ng	TAG_BX_AATATGTCACCC	69	T	C	117	29	83	T/C	0.2479	SNP
Lib10^4 1 ng	TAG_BX_AATATTCCGTAT	55	A	C	119	18	86	A/C	0.1513	SNP
Lib10^4 1 ng	TAG_BX_AATCAGATCTTC	60	T	G	132	15	112	T/G	0.1136	SNP
Lib10^4 1 ng	TAG_BX_AATCAGATCTTC	55	A	C	132	16	111	A/C	0.1212	SNP
Lib10^4 1 ng	TAG_BX_AATCCAAGATCG	55	A	C	144	23	110	A/C	0.1597	SNP
Lib10^4 1 ng	TAG_BX_AATCCCTTTTTC	55	A	C	52	6	43	A/C	0.1154	SNP
Lib10^4 1 ng	TAG_BX_AATCCGCGAGTT	69	T	C	71	12	55	T/C	0.169	SNP
Lib10^4 1 ng	TAG_BX_AATCCGGGTGGA	69	T	C	169	26	141	T/C	0.1538	SNP
Lib10^4 1 ng	TAG_BX_AATCCGTGAATT	55	A	C	108	15	84	A/C	0.1389	SNP
Lib10^4 1 ng	TAG_BX_AATCCTGACGTG	69	T	C	72	21	50	T/C	0.2917	SNP
Lib10^4 1 ng	TAG_BX_AATCCTGGATAT	69	T	C	107	24	80	T/C	0.2243	SNP
Lib10^4 1 ng	TAG_BX_AATCGCGAGGGA	55	A	C	53	10	41	A/C	0.1887	SNP
Lib10^4 1 ng	TAG_BX_AATCGCGAGGGA	60	T	G	53	6	46	T/G	0.1132	SNP
Lib10^4 1 ng	TAG_BX_AATCGGATGGCC	69	T	C	170	29	129	T/C	0.1706	SNP
Lib10^4 1 ng	TAG_BX_AATCGGTATATA	55	A	C	122	17	96	A/C	0.1393	SNP
Lib10^4 1 ng	TAG_BX_AATCGTTTGTAG	69	T	C	144	22	116	T/C	0.1528	SNP
Lib10^4 1 ng	TAG_BX_AATCGTTTTTGC	69	T	C	95	22	64	T/C	0.2316	SNP
Lib10^4 1 ng	TAG_BX_AATCTGATTGGA	55	A	C	130	21	101	A/C	0.1615	SNP
Lib10^4 1 ng	TAG_BX_AATCTGATTGGA	69	T	C	130	29	97	T/C	0.2231	SNP
Lib10^4 1 ng	TAG_BX_AATCTGCTGTTC	69	T	C	91	14	73	T/C	0.1538	SNP
Lib10^4 1 ng	TAG_BX_AATCTTTACTTA	69	T	C	162	33	122	T/C	0.2037	SNP
Lib10^4 1 ng	TAG_BX_AATCTTTGTTAT	69	T	C	83	12	71	T/C	0.1446	SNP
Lib10^4 1 ng	TAG_BX_AATGACGTCACT	69	T	C	141	32	105	T/C	0.227	SNP
Lib10^4 1 ng	TAG_BX_AATGAGTGGTCC	69	T	C	166	28	131	T/C	0.1687	SNP
Lib10^4 1 ng	TAG_BX_AATGAGTTCCAT	55	A	C	160	28	122	A/C	0.175	SNP
Lib10^4 1 ng	TAG_BX_AATGATCCTTCA	69	T	C	124	30	91	T/C	0.2419	SNP
Lib10^4 1 ng	TAG_BX_AATGCAATGTGA	69	T	C	190	46	131	T/C	0.2421	SNP
Lib10^4 1 ng	TAG_BX_AATGCGCCCGTC	69	T	C	177	33	133	T/C	0.1864	SNP
Lib10^4 1 ng	TAG_BX_AATGCGCTTTTC	55	A	C	160	18	126	A/C	0.1125	SNP
Lib10^4 1 ng	TAG_BX_AATGGATTTTTG	69	T	C	79	13	61	T/C	0.1646	SNP
Lib10^4 1 ng	TAG_BX_AATGGGGAGGCT	69	T	C	146	29	112	T/C	0.1986	SNP
Lib10^4 1 ng	TAG_BX_AATGTACCTCCA	69	T	C	79	18	59	T/C	0.2278	SNP
Lib10^4 1 ng	TAG_BX_AATGTACTCCTA	69	T	C	115	21	87	T/C	0.1826	SNP
Lib10^4 1 ng	TAG_BX_AATGTCTCGTAT	69	T	C	187	31	149	T/C	0.1658	SNP
Lib10^4 1 ng	TAG_BX_AATGTCTTTGGC	69	T	C	81	13	62	T/C	0.1605	SNP
Lib10^4 1 ng	TAG_BX_AATGTCTTTGGC	55	A	C	81	16	62	A/C	0.1975	SNP
Lib10^4 1 ng	TAG_BX_AATGTGGGCAGA	55	A	C	154	16	120	A/C	0.1039	SNP
Lib10^4 1 ng	TAG_BX_AATGTGGGGCAT	55	A	C	128	19	101	A/C	0.1484	SNP
Lib10^4 1 ng	TAG_BX_AATGTGGGTTCT	55	A	C	57	10	44	A/C	0.1754	SNP
Lib10^4 1 ng	TAG_BX_AATTAAGAGTTA	69	T	C	50	12	35	T/C	0.24	SNP
Lib10^4 1 ng	TAG_BX_AATTAATTCTCA	69	T	C	172	38	127	T/C	0.2209	SNP
Lib10^4 1 ng	TAG_BX_AATTACAAGGTG	69	T	C	100	25	71	T/C	0.25	SNP
Lib10^4 1 ng	TAG_BX_AATTAGATGCGG	69	T	C	88	21	65	T/C	0.2386	SNP
Lib10^4 1 ng	TAG_BX_AATTATGGTATC	69	T	C	136	32	96	T/C	0.2353	SNP
Lib10^4 1 ng	TAG_BX_AATTCATTCTGC	55	A	C	127	21	104	A/C	0.1654	SNP
Lib10^4 1 ng	TAG_BX_AATTCCCGTGCC	69	T	C	103	21	74	T/C	0.2039	SNP
Lib10^4 1 ng	TAG_BX_AATTCCCGTGCC	55	A	C	103	14	83	A/C	0.1359	SNP
Lib10^4 1 ng	TAG_BX_AATTCCGTAACG	69	T	C	121	33	86	T/C	0.2727	SNP
Lib10^4 1 ng	TAG_BX_AATTCGGTCAGT	55	A	C	144	20	112	A/C	0.1389	SNP
Lib10^4 1 ng	TAG_BX_AATTCGTAATCT	69	T	C	120	36	80	T/C	0.3	SNP
Lib10^4 1 ng	TAG_BX_AATTCTCGCGCG	55	A	C	89	12	70	A/C	0.1348	SNP
Lib10^4 1 ng	TAG_BX_AATTGATACACC	69	T	C	124	25	94	T/C	0.2016	SNP
Lib10^4 1 ng	TAG_BX_AATTGCATGATT	55	A	C	141	23	108	A/C	0.1631	SNP
Lib10^4 1 ng	TAG_BX_AATTGCGATGGT	69	T	C	47	13	31	T/C	0.2766	SNP
Lib10^4 1 ng	TAG_BX_AATTGTGTATCA	69	T	C	283	50	219	T/C	0.1767	SNP
Lib10^4 1 ng	TAG_BX_AATTTAGGATGG	69	T	C	99	21	75	T/C	0.2121	SNP
Lib10^4 1 ng	TAG_BX_AATTTCGGTGCT	69	T	C	172	36	130	T/C	0.2093	SNP
Lib10^4 1 ng	TAG_BX_AATTTCGTATCA	69	T	C	98	18	80	T/C	0.1837	SNP
Lib10^4 1 ng	TAG_BX_AATTTCGTGGTC	69	T	C	83	16	65	T/C	0.1928	SNP
Lib10^4 1 ng	TAG_BX_AATTTGTATGGC	55	A	C	110	16	83	A/C	0.1455	SNP
Lib10^4 1 ng	TAG_BX_AATTTGTTATTT	69	T	C	161	36	117	T/C	0.2236	SNP
Lib10^4 1 ng	TAG_BX_AATTTTAATGTC	69	T	C	63	13	47	T/C	0.2063	SNP
Lib10^4 1 ng	TAG_BX_AATTTTTCTAAA	69	T	C	162	32	122	T/C	0.1975	SNP
Lib10^4 1 ng	TAG_BX_ACAAAAATATGC	69	T	C	56	15	40	T/C	0.2679	SNP
Lib10^4 1 ng	TAG_BX_ACAAAGCACGAT	69	T	C	135	25	103	T/C	0.1852	SNP
Lib10^4 1 ng	TAG_BX_ACAACAGAATGA	69	T	C	146	30	106	T/C	0.2055	SNP
Lib10^4 1 ng	TAG_BX_ACAACCCTATAT	60	T	G	54	6	46	T/G	0.1111	SNP
Lib10^4 1 ng	TAG_BX_ACAAGCCTATTT	55	A	C	119	17	98	A/C	0.1429	SNP
Lib10^4 1 ng	TAG_BX_ACAAGTATAGGA	55	A	C	90	13	73	A/C	0.1444	SNP
Lib10^4 1 ng	TAG_BX_ACAATCTTTAAG	69	T	C	65	15	48	T/C	0.2308	SNP
Lib10^4 1 ng	TAG_BX_ACAATTCGTAAG	55	A	C	143	25	107	A/C	0.1748	SNP
Lib10^4 1 ng	TAG_BX_ACAATTTCGCTG	69	T	C	80	17	60	T/C	0.2125	SNP
Lib10^4 1 ng	TAG_BX_ACACACTCTTAT	55	A	C	76	10	58	A/C	0.1316	SNP
Lib10^4 1 ng	TAG_BX_ACACATATGGGA	55	A	C	171	29	131	A/C	0.1696	SNP
Lib10^4 1 ng	TAG_BX_ACACCAGCGTAT	55	A	C	107	13	84	A/C	0.1215	SNP
Lib10^4 1 ng	TAG_BX_ACACCCTGGTCG	69	T	C	134	32	97	T/C	0.2388	SNP
Lib10^4 1 ng	TAG_BX_ACACCTCACGCG	69	T	C	129	27	96	T/C	0.2093	SNP
Lib10^4 1 ng	TAG_BX_ACACGCCCCTTT	55	A	C	139	17	115	A/C	0.1223	SNP
Lib10^4 1 ng	TAG_BX_ACACGCCCCTTT	69	T	C	139	24	106	T/C	0.1727	SNP
Lib10^4 1 ng	TAG_BX_ACACGTTATATT	55	A	C	55	10	39	A/C	0.1818	SNP
Lib10^4 1 ng	TAG_BX_ACACGTTATATT	69	T	C	55	10	45	T/C	0.1818	SNP
Lib10^4 1 ng	TAG_BX_ACACTAATCCCA	60	T	G	68	7	61	T/G	0.1029	SNP
Lib10^4 1 ng	TAG_BX_ACACTACGAGCC	69	T	C	71	14	52	T/C	0.1972	SNP
Lib10^4 1 ng	TAG_BX_ACACTAGGTCAT	69	T	C	51	9	42	T/C	0.1765	SNP
Lib10^4 1 ng	TAG_BX_ACACTGAATTTT	69	T	C	54	13	39	T/C	0.2407	SNP
Lib10^4 1 ng	TAG_BX_ACACTTAAAGGA	55	A	C	194	21	158	A/C	0.1082	SNP
Lib10^4 1 ng	TAG_BX_ACACTTATGCAC	69	T	C	125	33	89	T/C	0.264	SNP
Lib10^4 1 ng	TAG_BX_ACAGCATTGATA	55	A	C	91	11	73	A/C	0.1209	SNP
Lib10^4 1 ng	TAG_BX_ACAGGCGGGCAA	58	T	G	53	7	44	T/G	0.1321	SNP
Lib10^4 1 ng	TAG_BX_ACAGGGGTTAGC	69	T	C	225	49	168	T/C	0.2178	SNP
Lib10^4 1 ng	TAG_BX_ACAGGGTCTGTG	69	T	C	68	15	49	T/C	0.2206	SNP
Lib10^4 1 ng	TAG_BX_ACAGGTGTAGTT	69	T	C	122	29	90	T/C	0.2377	SNP
Lib10^4 1 ng	TAG_BX_ACAGTTCGTGTA	55	A	C	85	9	69	A/C	0.1059	SNP
Lib10^4 1 ng	TAG_BX_ACAGTTTGGATG	55	A	C	214	30	169	A/C	0.1402	SNP
Lib10^4 1 ng	TAG_BX_ACATACCTGTCA	52	A	C	88	9	75	A/C	0.1023	SNP
Lib10^4 1 ng	TAG_BX_ACATACCTGTCA	69	T	C	88	24	62	T/C	0.2727	SNP
Lib10^4 1 ng	TAG_BX_ACATACCTGTCA	63	T	G	88	13	74	T/G	0.1477	SNP
Lib10^4 1 ng	TAG_BX_ACATACGTTGGT	69	T	C	58	10	46	T/C	0.1724	SNP
Lib10^4 1 ng	TAG_BX_ACATAGGTTCTA	55	A	C	111	22	82	A/C	0.1982	SNP
Lib10^4 1 ng	TAG_BX_ACATATAGCCCT	55	A	C	130	17	105	A/C	0.1308	SNP
Lib10^4 1 ng	TAG_BX_ACATCCTCGCAG	69	T	C	88	21	62	T/C	0.2386	SNP
Lib10^4 1 ng	TAG_BX_ACATCCTCGCAG	55	A	C	88	12	70	A/C	0.1364	SNP
Lib10^4 1 ng	TAG_BX_ACATCGTCGGTA	69	T	C	93	21	71	T/C	0.2258	SNP
Lib10^4 1 ng	TAG_BX_ACATCTACAACT	69	T	C	74	18	55	T/C	0.2432	SNP
Lib10^4 1 ng	TAG_BX_ACATGTCACGGC	55	A	C	148	27	115	A/C	0.1824	SNP
Lib10^4 1 ng	TAG_BX_ACATTATTAGGT	55	A	C	97	11	80	A/C	0.1134	SNP
Lib10^4 1 ng	TAG_BX_ACATTCGCGTCT	55	A	C	86	16	68	A/C	0.186	SNP
Lib10^4 1 ng	TAG_BX_ACATTCTTAGTT	69	T	C	114	28	84	T/C	0.2456	SNP
Lib10^4 1 ng	TAG_BX_ACATTGGTGACT	69	T	C	124	34	88	T/C	0.2742	SNP
Lib10^4 1 ng	TAG_BX_ACATTTACCACA	69	T	C	124	25	97	T/C	0.2016	SNP
Lib10^4 1 ng	TAG_BX_ACATTTCCAATC	69	T	C	95	20	69	T/C	0.2105	SNP
Lib10^4 1 ng	TAG_BX_ACATTTTATGTA	69	T	C	138	28	102	T/C	0.2029	SNP
Lib10^4 1 ng	TAG_BX_ACCAATGTGTCT	69	T	C	138	25	98	T/C	0.1812	SNP
Lib10^4 1 ng	TAG_BX_ACCACCTGTAGT	69	T	C	97	21	73	T/C	0.2165	SNP
Lib10^4 1 ng	TAG_BX_ACCACTTTAACT	69	T	C	49	16	31	T/C	0.3265	SNP
Lib10^4 1 ng	TAG_BX_ACCATAATAGAA	69	T	C	104	25	76	T/C	0.2404	SNP
Lib10^4 1 ng	TAG_BX_ACCATAATAGAA	55	A	C	104	18	79	A/C	0.1731	SNP
Lib10^4 1 ng	TAG_BX_ACCATCGTGAGA	55	A	C	114	14	91	A/C	0.1228	SNP
Lib10^4 1 ng	TAG_BX_ACCATGGAAGGC	55	A	C	70	11	54	A/C	0.1571	SNP
Lib10^4 1 ng	TAG_BX_ACCATTATCCTA	55	A	C	110	18	83	A/C	0.1636	SNP
Lib10^4 1 ng	TAG_BX_ACCATTGACGCA	69	T	C	145	30	111	T/C	0.2069	SNP
Lib10^4 1 ng	TAG_BX_ACCATTTTGTAA	69	T	C	54	10	41	T/C	0.1852	SNP
Lib10^4 1 ng	TAG_BX_ACCATTTTGTAA	55	A	C	54	7	46	A/C	0.1296	SNP
Lib10^4 1 ng	TAG_BX_ACCCAATTTACT	69	T	C	107	21	81	T/C	0.1963	SNP
Lib10^4 1 ng	TAG_BX_ACCCACCGGCTG	69	T	C	128	28	93	T/C	0.2188	SNP
Lib10^4 1 ng	TAG_BX_ACCCCCAAGGTA	55	A	C	98	12	77	A/C	0.1224	SNP
Lib10^4 1 ng	TAG_BX_ACCCCTTTTTCG	69	T	C	96	20	75	T/C	0.2083	SNP
Lib10^4 1 ng	TAG_BX_ACCCTACCCTGG	69	T	C	101	26	75	T/C	0.2574	SNP
Lib10^4 1 ng	TAG_BX_ACCCTATTGTAA	69	T	C	165	34	126	T/C	0.2061	SNP
Lib10^4 1 ng	TAG_BX_ACCCTCTATCAT	69	T	C	61	11	48	T/C	0.1803	SNP
Lib10^4 1 ng	TAG_BX_ACCGAACTGTCG	55	A	C	88	10	73	A/C	0.1136	SNP
Lib10^4 1 ng	TAG_BX_ACCGAACTGTCG	69	T	C	88	17	67	T/C	0.1932	SNP
Lib10^4 1 ng	TAG_BX_ACCGAAGCCTCG	69	T	C	134	20	106	T/C	0.1493	SNP
Lib10^4 1 ng	TAG_BX_ACCGAAGCGTAC	55	A	C	138	15	118	A/C	0.1087	SNP
Lib10^4 1 ng	TAG_BX_ACCGCTTTAAAT	69	T	C	63	13	47	T/C	0.2063	SNP
Lib10^4 1 ng	TAG_BX_ACCGCTTTAAAT	55	A	C	63	9	48	A/C	0.1429	SNP
Lib10^4 1 ng	TAG_BX_ACCGGATTCATG	50	G	C	39	6	33	G/C	0.1538	SNP
Lib10^4 1 ng	TAG_BX_ACCGGATTCATG	55	A	C	39	6	32	A/C	0.1538	SNP
Lib10^4 1 ng	TAG_BX_ACCGGCGCCACG	55	A	C	135	19	108	A/C	0.1407	SNP
Lib10^4 1 ng	TAG_BX_ACCGGGATAGTG	69	T	C	319	64	242	T/C	0.2006	SNP
Lib10^4 1 ng	TAG_BX_ACCGGTACTATA	69	T	C	159	35	116	T/C	0.2201	SNP
Lib10^4 1 ng	TAG_BX_ACCGTCCGGTCA	69	T	C	48	7	38	T/C	0.1458	SNP
Lib10^4 1 ng	TAG_BX_ACCGTTAGGGGT	55	A	C	142	19	111	A/C	0.1338	SNP
Lib10^4 1 ng	TAG_BX_ACCTACCATTTG	69	T	C	87	25	57	T/C	0.2874	SNP
Lib10^4 1 ng	TAG_BX_ACCTATCGGTGG	55	A	C	133	23	103	A/C	0.1729	SNP
Lib10^4 1 ng	TAG_BX_ACCTCCATGGTT	55	A	C	142	22	111	A/C	0.1549	SNP
Lib10^4 1 ng	TAG_BX_ACCTCGACGTGG	69	T	C	105	17	82	T/C	0.1619	SNP
Lib10^4 1 ng	TAG_BX_ACCTCGCATCGT	55	A	C	291	49	219	A/C	0.1684	SNP
Lib10^4 1 ng	TAG_BX_ACCTCTGGCCTT	69	T	C	124	21	96	T/C	0.1694	SNP
Lib10^4 1 ng	TAG_BX_ACCTCTGTTTCC	69	T	C	104	18	83	T/C	0.1731	SNP
Lib10^4 1 ng	TAG_BX_ACCTCTGTTTCC	63	T	G	104	11	92	T/G	0.1058	SNP
Lib10^4 1 ng	TAG_BX_ACCTGATTCTCT	55	A	C	106	18	82	A/C	0.1698	SNP
Lib10^4 1 ng	TAG_BX_ACCTGCAGAGTG	55	A	C	137	16	112	A/C	0.1168	SNP
Lib10^4 1 ng	TAG_BX_ACCTGGGTCTCA	55	A	C	115	18	93	A/C	0.1565	SNP
Lib10^4 1 ng	TAG_BX_ACCTTAAAGCCA	55	A	C	119	13	101	A/C	0.1092	SNP
Lib10^4 1 ng	TAG_BX_ACCTTCCGGTGT	69	T	C	209	39	163	T/C	0.1866	SNP
Lib10^4 1 ng	TAG_BX_ACCTTCGTGCCT	55	A	C	64	9	48	A/C	0.1406	SNP
Lib10^4 1 ng	TAG_BX_ACCTTCTATGTT	55	A	C	103	18	77	A/C	0.1748	SNP
Lib10^4 1 ng	TAG_BX_ACCTTGCTAGCG	69	T	C	80	21	58	T/C	0.2625	SNP
Lib10^4 1 ng	TAG_BX_ACGAACAGTTAC	69	T	C	129	19	101	T/C	0.1473	SNP
Lib10^4 1 ng	TAG_BX_ACGAACAGTTAC	55	A	C	129	18	105	A/C	0.1395	SNP
Lib10^4 1 ng	TAG_BX_ACGAAGCGGGGT	69	T	C	143	30	107	T/C	0.2098	SNP
Lib10^4 1 ng	TAG_BX_ACGAAGCGGGGT	55	A	C	143	18	114	A/C	0.1259	SNP
Lib10^4 1 ng	TAG_BX_ACGAATTTGCTT	55	A	C	99	15	75	A/C	0.1515	SNP
Lib10^4 1 ng	TAG_BX_ACGACATATTAA	55	A	C	126	16	101	A/C	0.127	SNP
Lib10^4 1 ng	TAG_BX_ACGACGGGCTGT	69	T	C	81	20	59	T/C	0.2469	SNP
Lib10^4 1 ng	TAG_BX_ACGAGGGCAATA	69	T	C	58	13	43	T/C	0.2241	SNP
Lib10^4 1 ng	TAG_BX_ACGATTCTTTGC	38	A	G	128	15	109	A/G	0.1172	SNP
Lib10^4 1 ng	TAG_BX_ACGATTCTTTGC	55	A	C	129	22	99	A/C	0.1705	SNP
Lib10^4 1 ng	TAG_BX_ACGCAAGTCCAG	55	A	C	267	32	215	A/C	0.1199	SNP
Lib10^4 1 ng	TAG_BX_ACGCACTCAGCT	69	T	C	43	8	34	T/C	0.186	SNP
Lib10^4 1 ng	TAG_BX_ACGCACTCAGCT	40	G	C	43	5	37	G/C	0.1163	SNP
Lib10^4 1 ng	TAG_BX_ACGCCCATTCTT	69	T	C	66	18	45	T/C	0.2727	SNP
Lib10^4 1 ng	TAG_BX_ACGCCCTGTTTC	69	T	C	72	18	51	T/C	0.25	SNP
Lib10^4 1 ng	TAG_BX_ACGCGACTTTTA	55	A	C	169	31	130	A/C	0.1834	SNP
Lib10^4 1 ng	TAG_BX_ACGCGATGTTCG	69	T	C	167	36	125	T/C	0.2156	SNP
Lib10^4 1 ng	TAG_BX_ACGCGTGCCAAG	69	T	C	61	15	45	T/C	0.2459	SNP
Lib10^4 1 ng	TAG_BX_ACGCGTGCCAAG	55	A	C	61	8	51	A/C	0.1311	SNP
Lib10^4 1 ng	TAG_BX_ACGCGTTAGTTA	69	T	C	94	23	64	T/C	0.2447	SNP
Lib10^4 1 ng	TAG_BX_ACGCTAGTTCAT	69	T	C	149	30	112	T/C	0.2013	SNP
Lib10^4 1 ng	TAG_BX_ACGGACCCGGAA	69	T	C	158	41	106	T/C	0.2595	SNP
Lib10^4 1 ng	TAG_BX_ACGGACTGTGTG	69	T	C	100	26	70	T/C	0.26	SNP
Lib10^4 1 ng	TAG_BX_ACGGACTGTGTG	55	A	C	102	11	83	A/C	0.1078	SNP
Lib10^4 1 ng	TAG_BX_ACGGAGCTATCG	55	A	C	148	22	118	A/C	0.1486	SNP
Lib10^4 1 ng	TAG_BX_ACGGATTAGTCT	69	T	C	101	19	78	T/C	0.1881	SNP
Lib10^4 1 ng	TAG_BX_ACGGCCGTTGGT	55	A	C	48	5	39	A/C	0.1042	SNP
Lib10^4 1 ng	TAG_BX_ACGGCTCTTATG	69	T	C	138	35	97	T/C	0.2536	SNP
Lib10^4 1 ng	TAG_BX_ACGGCTCTTTTA	69	T	C	62	13	45	T/C	0.2097	SNP
Lib10^4 1 ng	TAG_BX_ACGGCTTATCCC	69	T	C	106	18	82	T/C	0.1698	SNP
Lib10^4 1 ng	TAG_BX_ACGGGAGTCTTA	69	T	C	209	61	139	T/C	0.2919	SNP
Lib10^4 1 ng	TAG_BX_ACGGGAGTGGAC	69	T	C	137	16	117	T/C	0.1168	SNP
Lib10^4 1 ng	TAG_BX_ACGGGGCTTGCC	52	A	C	196	22	165	A/C	0.1122	SNP
Lib10^4 1 ng	TAG_BX_ACGGGGTGTAGC	55	A	C	139	19	105	A/C	0.1367	SNP
Lib10^4 1 ng	TAG_BX_ACGGGGTTGTAA	69	T	C	115	23	86	T/C	0.2	SNP
Lib10^4 1 ng	TAG_BX_ACGGGTGCTCAT	55	A	C	148	25	119	A/C	0.1689	SNP
Lib10^4 1 ng	TAG_BX_ACGGGTGGTGAT	60	T	G	94	11	80	T/G	0.117	SNP
Lib10^4 1 ng	TAG_BX_ACGGGTTTCGTA	69	T	C	70	11	56	T/C	0.1571	SNP
Lib10^4 1 ng	TAG_BX_ACGGGTTTCGTA	55	A	C	70	9	60	A/C	0.1286	SNP
Lib10^4 1 ng	TAG_BX_ACGGTACCCAAT	69	T	C	117	26	85	T/C	0.2222	SNP
Lib10^4 1 ng	TAG_BX_ACGGTCACTCTT	69	T	C	105	28	72	T/C	0.2667	SNP
Lib10^4 1 ng	TAG_BX_ACGGTGTCTTGG	69	T	C	135	35	91	T/C	0.2593	SNP
Lib10^4 1 ng	TAG_BX_ACGGTTGGCCTG	69	T	C	160	30	126	T/C	0.1875	SNP
Lib10^4 1 ng	TAG_BX_ACGGTTGGCCTG	55	A	C	160	31	121	A/C	0.1938	SNP
Lib10^4 1 ng	TAG_BX_ACGTACTTGTAT	55	A	C	104	14	84	A/C	0.1346	SNP
Lib10^4 1 ng	TAG_BX_ACGTATCCTGGG	55	A	C	235	33	186	A/C	0.1404	SNP
Lib10^4 1 ng	TAG_BX_ACGTATGCTCTG	69	T	C	109	25	75	T/C	0.2294	SNP
Lib10^4 1 ng	TAG_BX_ACGTGCCGTGTA	55	A	C	156	19	129	A/C	0.1218	SNP
Lib10^4 1 ng	TAG_BX_ACGTGGTGGTGC	69	T	C	98	17	78	T/C	0.1735	SNP
Lib10^4 1 ng	TAG_BX_ACGTGTGGTTTA	55	A	C	179	28	141	A/C	0.1564	SNP
Lib10^4 1 ng	TAG_BX_ACGTGTTCCCCT	55	A	C	106	19	81	A/C	0.1792	SNP
Lib10^4 1 ng	TAG_BX_ACGTTAAATAGT	52	A	T	49	5	38	A/T	0.102	SNP
Lib10^4 1 ng	TAG_BX_ACGTTCAAATTT	69	T	C	114	23	85	T/C	0.2018	SNP
Lib10^4 1 ng	TAG_BX_ACGTTCAATATC	69	T	C	84	22	57	T/C	0.2619	SNP
Lib10^4 1 ng	TAG_BX_ACGTTCAGGAAG	69	T	C	109	15	89	T/C	0.1376	SNP
Lib10^4 1 ng	TAG_BX_ACGTTCTTTCCA	69	T	C	220	49	164	T/C	0.2227	SNP
Lib10^4 1 ng	TAG_BX_ACGTTTCCTAAG	-58	T	C	61	61	0	T/C	1	SNP
Lib10^4 1 ng	TAG_BX_ACGTTTCCTAAG	69	T	C	62	11	47	T/C	0.1774	SNP
Lib10^4 1 ng	TAG_BX_ACGTTTCCTAAG	68	T	C	62	7	51	T/C	0.1129	SNP
Lib10^4 1 ng	TAG_BX_ACTAACTGCCGC	69	T	C	90	24	59	T/C	0.2667	SNP
Lib10^4 1 ng	TAG_BX_ACTAGTAAGGTG	55	A	C	70	11	57	A/C	0.1571	SNP
Lib10^4 1 ng	TAG_BX_ACTAGTACTTAT	55	A	C	87	14	70	A/C	0.1609	SNP
Lib10^4 1 ng	TAG_BX_ACTAGTACTTAT	69	T	C	87	12	74	T/C	0.1379	SNP
Lib10^4 1 ng	TAG_BX_ACTAGTGCCAGT	55	A	C	104	16	85	A/C	0.1538	SNP
Lib10^4 1 ng	TAG_BX_ACTAGTTCGGAG	55	A	C	127	17	102	A/C	0.1339	SNP
Lib10^4 1 ng	TAG_BX_ACTATAGCGCAT	69	T	C	97	20	73	T/C	0.2062	SNP
Lib10^4 1 ng	TAG_BX_ACTATATTCCTT	69	T	C	198	37	153	T/C	0.1869	SNP
Lib10^4 1 ng	TAG_BX_ACTATGTGTTTT	69	T	C	163	36	117	T/C	0.2209	SNP
Lib10^4 1 ng	TAG_BX_ACTATTCACCGT	69	T	C	105	23	78	T/C	0.219	SNP
Lib10^4 1 ng	TAG_BX_ACTCAGCCGTTA	55	A	C	101	11	86	A/C	0.1089	SNP
Lib10^4 1 ng	TAG_BX_ACTCCAGGGTAC	69	T	C	121	19	96	T/C	0.157	SNP
Lib10^4 1 ng	TAG_BX_ACTCCCTTTACT	69	T	C	98	20	78	T/C	0.2041	SNP
Lib10^4 1 ng	TAG_BX_ACTCCTGGTTTT	55	A	C	149	21	118	A/C	0.1409	SNP
Lib10^4 1 ng	TAG_BX_ACTCGCGAGTAT	69	T	C	226	53	166	T/C	0.2345	SNP
Lib10^4 1 ng	TAG_BX_ACTCGCTAAATT	58	T	G	68	8	55	T/G	0.1176	SNP
Lib10^4 1 ng	TAG_BX_ACTCGGCCACTT	69	T	C	97	18	72	T/C	0.1856	SNP
Lib10^4 1 ng	TAG_BX_ACTCGGGGAGAG	69	T	C	154	38	108	T/C	0.2468	SNP
Lib10^4 1 ng	TAG_BX_ACTCGTTCTTCC	55	A	C	151	19	124	A/C	0.1258	SNP
Lib10^4 1 ng	TAG_BX_ACTCGTTGTACT	69	T	C	83	16	65	T/C	0.1928	SNP
Lib10^4 1 ng	TAG_BX_ACTCGTTGTACT	55	A	C	83	14	67	A/C	0.1687	SNP
Lib10^4 1 ng	TAG_BX_ACTCTACCCTTG	63	T	G	126	13	109	T/G	0.1032	SNP
Lib10^4 1 ng	TAG_BX_ACTCTAGTGCTT	55	A	C	154	25	116	A/C	0.1623	SNP
Lib10^4 1 ng	TAG_BX_ACTCTGTTGAGA	55	A	C	160	22	122	A/C	0.1375	SNP
Lib10^4 1 ng	TAG_BX_ACTCTTACCCCT	55	A	C	85	18	59	A/C	0.2118	SNP
Lib10^4 1 ng	TAG_BX_ACTCTTATCGCG	69	T	C	57	16	41	T/C	0.2807	SNP
Lib10^4 1 ng	TAG_BX_ACTCTTCCTACT	69	T	C	104	19	83	T/C	0.1827	SNP
Lib10^4 1 ng	TAG_BX_ACTCTTGGTAGT	69	T	C	44	11	31	T/C	0.25	SNP
Lib10^4 1 ng	TAG_BX_ACTCTTGTTTCT	55	A	C	99	11	77	A/C	0.1111	SNP
Lib10^4 1 ng	TAG_BX_ACTGAAAGCGGC	55	A	C	133	21	103	A/C	0.1579	SNP
Lib10^4 1 ng	TAG_BX_ACTGAAGGCGTT	69	T	C	126	28	94	T/C	0.2222	SNP
Lib10^4 1 ng	TAG_BX_ACTGCAAGATCA	63	T	G	112	12	98	T/G	0.1071	SNP
Lib10^4 1 ng	TAG_BX_ACTGCCTGAAAT	55	A	C	98	11	82	A/C	0.1122	SNP
Lib10^4 1 ng	TAG_BX_ACTGCGTCTATG	55	A	C	132	16	107	A/C	0.1212	SNP
Lib10^4 1 ng	TAG_BX_ACTGCGTTCTCT	69	T	C	126	36	90	T/C	0.2857	SNP
Lib10^4 1 ng	TAG_BX_ACTGCGTTCTCT	55	A	C	126	20	96	A/C	0.1587	SNP
Lib10^4 1 ng	TAG_BX_ACTGCTATTGTA	55	A	C	148	26	110	A/C	0.1757	SNP
Lib10^4 1 ng	TAG_BX_ACTGCTATTGTA	69	T	C	148	39	104	T/C	0.2635	SNP
Lib10^4 1 ng	TAG_BX_ACTGCTCCCAAG	55	A	C	191	20	148	A/C	0.1047	SNP
Lib10^4 1 ng	TAG_BX_ACTGGCGGTTCA	55	A	C	331	45	276	A/C	0.136	SNP
Lib10^4 1 ng	TAG_BX_ACTGGGATTGTT	55	A	C	66	8	55	A/C	0.1212	SNP
Lib10^4 1 ng	TAG_BX_ACTGGGTAGTAT	55	A	C	94	16	72	A/C	0.1702	SNP
Lib10^4 1 ng	TAG_BX_ACTGGGTAGTAT	69	T	C	94	13	78	T/C	0.1383	SNP
Lib10^4 1 ng	TAG_BX_ACTGGTGAGGAT	69	T	C	260	51	204	T/C	0.1962	SNP
Lib10^4 1 ng	TAG_BX_ACTGTACTTCTG	55	A	C	186	24	148	A/C	0.129	SNP
Lib10^4 1 ng	TAG_BX_ACTGTCCTCATT	55	A	C	128	19	98	A/C	0.1484	SNP
Lib10^4 1 ng	TAG_BX_ACTGTCTTGATT	69	T	C	130	35	90	T/C	0.2692	SNP
Lib10^4 1 ng	TAG_BX_ACTGTGCCTTCC	55	A	C	45	8	35	A/C	0.1778	SNP
Lib10^4 1 ng	TAG_BX_ACTGTGGTTAGG	69	T	C	203	38	157	T/C	0.1872	SNP
Lib10^4 1 ng	TAG_BX_ACTGTTTGGTGC	60	T	G	88	9	77	T/G	0.1023	SNP
Lib10^4 1 ng	TAG_BX_ACTGTTTTCCCA	69	T	C	115	30	80	T/C	0.2609	SNP
Lib10^4 1 ng	TAG_BX_ACTTAACGTTTT	69	T	C	261	54	194	T/C	0.2069	SNP
Lib10^4 1 ng	TAG_BX_ACTTAATTCAAC	55	A	C	45	6	36	A/C	0.1333	SNP
Lib10^4 1 ng	TAG_BX_ACTTATCTCGTC	55	A	C	124	19	100	A/C	0.1532	SNP
Lib10^4 1 ng	TAG_BX_ACTTATGTGGGT	55	A	C	177	25	137	A/C	0.1412	SNP
Lib10^4 1 ng	TAG_BX_ACTTCGTTTCCG	69	T	C	115	26	83	T/C	0.2261	SNP
Lib10^4 1 ng	TAG_BX_ACTTCTATCCTC	69	T	C	132	25	97	T/C	0.1894	SNP
Lib10^4 1 ng	TAG_BX_ACTTCTTGACCG	50	G	C	68	7	59	G/C	0.1029	SNP
Lib10^4 1 ng	TAG_BX_ACTTCTTGACCG	52	A	T	68	7	57	A/T	0.1029	SNP
Lib10^4 1 ng	TAG_BX_ACTTGCAGATCA	69	T	C	117	28	86	T/C	0.2393	SNP
Lib10^4 1 ng	TAG_BX_ACTTGCTGATTA	55	A	C	137	25	101	A/C	0.1825	SNP
Lib10^4 1 ng	TAG_BX_ACTTGCTGATTA	69	T	C	137	28	107	T/C	0.2044	SNP
Lib10^4 1 ng	TAG_BX_ACTTGGAGTTCG	55	A	C	113	20	85	A/C	0.177	SNP
Lib10^4 1 ng	TAG_BX_ACTTGGTACTGG	55	A	C	121	18	94	A/C	0.1488	SNP
Lib10^4 1 ng	TAG_BX_ACTTGTCATGTG	55	A	C	170	20	133	A/C	0.1176	SNP
Lib10^4 1 ng	TAG_BX_ACTTGTCTTGCG	69	T	C	174	32	135	T/C	0.1839	SNP
Lib10^4 1 ng	TAG_BX_ACTTTCCTTTCC	55	A	C	92	16	69	A/C	0.1739	SNP
Lib10^4 1 ng	TAG_BX_ACTTTCGTGTTT	45	T	A	88	10	68	T/A	0.1136	SNP
Lib10^4 1 ng	TAG_BX_ACTTTGATAACA	55	A	C	104	12	85	A/C	0.1154	SNP
Lib10^4 1 ng	TAG_BX_ACTTTGCTTCCC	69	T	C	187	38	143	T/C	0.2032	SNP
Lib10^4 1 ng	TAG_BX_ACTTTGGATGTG	35	A	G	146	16	119	A/G	0.1096	SNP
Lib10^4 1 ng	TAG_BX_ACTTTGGCGGCC	55	A	C	163	23	129	A/C	0.1411	SNP
Lib10^4 1 ng	TAG_BX_ACTTTTACTACC	69	T	C	88	17	66	T/C	0.1932	SNP
Lib10^4 1 ng	TAG_BX_ACTTTTAGTTTT	69	T	C	156	38	110	T/C	0.2436	SNP
Lib10^4 1 ng	TAG_BX_ACTTTTCTGGGC	55	A	C	144	21	112	A/C	0.1458	SNP
Lib10^4 1 ng	TAG_BX_ACTTTTTCGCTC	69	T	C	135	32	96	T/C	0.237	SNP
Lib10^4 1 ng	TAG_BX_ACTTTTTCTGTC	55	A	C	137	18	111	A/C	0.1314	SNP
Lib10^4 1 ng	TAG_BX_ACTTTTTTGGCT	69	T	C	135	26	103	T/C	0.1926	SNP
Lib10^4 1 ng	TAG_BX_AGAACGTGAAGT	69	T	C	214	47	154	T/C	0.2196	SNP
Lib10^4 1 ng	TAG_BX_AGAACTTCTTCG	55	A	C	177	23	144	A/C	0.1299	SNP
Lib10^4 1 ng	TAG_BX_AGAAGAAGGTGA	69	T	C	111	25	82	T/C	0.2252	SNP
Lib10^4 1 ng	TAG_BX_AGAAGAGTCGGG	69	T	C	88	21	65	T/C	0.2386	SNP
Lib10^4 1 ng	TAG_BX_AGAAGCTTATCG	69	T	C	90	20	67	T/C	0.2222	SNP
Lib10^4 1 ng	TAG_BX_AGAAGGTTTGGG	55	A	C	69	13	54	A/C	0.1884	SNP
Lib10^4 1 ng	TAG_BX_AGAAGGTTTGGG	69	T	C	69	16	49	T/C	0.2319	SNP
Lib10^4 1 ng	TAG_BX_AGAATGCCAGCC	55	A	C	114	17	95	A/C	0.1491	SNP
Lib10^4 1 ng	TAG_BX_AGAATGGTTGTC	55	A	C	138	25	104	A/C	0.1812	SNP
Lib10^4 1 ng	TAG_BX_AGAATTTGGCTT	69	T	C	142	27	106	T/C	0.1901	SNP
Lib10^4 1 ng	TAG_BX_AGACAAGCCAAG	55	A	C	106	18	85	A/C	0.1698	SNP
Lib10^4 1 ng	TAG_BX_AGACAAGCCAAG	69	T	C	106	22	82	T/C	0.2075	SNP
Lib10^4 1 ng	TAG_BX_AGACATTGTGGG	69	T	C	130	24	99	T/C	0.1846	SNP
Lib10^4 1 ng	TAG_BX_AGACCAATACCA	69	T	C	121	23	89	T/C	0.1901	SNP
Lib10^4 1 ng	TAG_BX_AGACCGGGGAGT	55	A	C	113	16	87	A/C	0.1416	SNP
Lib10^4 1 ng	TAG_BX_AGACGAGTGTGC	69	T	C	197	47	146	T/C	0.2386	SNP
Lib10^4 1 ng	TAG_BX_AGACGCTAGTAT	69	T	C	92	23	65	T/C	0.25	SNP
Lib10^4 1 ng	TAG_BX_AGACGTTTGCGG	69	T	C	197	43	150	T/C	0.2183	SNP
Lib10^4 1 ng	TAG_BX_AGACTAGCAATT	55	A	C	103	11	87	A/C	0.1068	SNP
Lib10^4 1 ng	TAG_BX_AGACTAGCAATT	69	T	C	103	12	87	T/C	0.1165	SNP
Lib10^4 1 ng	TAG_BX_AGACTATATTTA	69	T	C	111	20	82	T/C	0.1802	SNP
Lib10^4 1 ng	TAG_BX_AGACTCTCGGCA	55	A	C	95	10	72	A/C	0.1053	SNP
Lib10^4 1 ng	TAG_BX_AGAGCGATAGAA	55	A	C	114	13	90	A/C	0.114	SNP
Lib10^4 1 ng	TAG_BX_AGAGCGATAGAA	69	T	C	114	26	87	T/C	0.2281	SNP
Lib10^4 1 ng	TAG_BX_AGAGGCGAGGTA	69	T	C	99	18	76	T/C	0.1818	SNP
Lib10^4 1 ng	TAG_BX_AGAGGGTCGTGA	69	T	C	213	49	158	T/C	0.23	SNP
Lib10^4 1 ng	TAG_BX_AGAGGGTGAACC	55	A	C	167	23	136	A/C	0.1377	SNP
Lib10^4 1 ng	TAG_BX_AGAGGGTGAACC	69	T	C	167	42	118	T/C	0.2515	SNP
Lib10^4 1 ng	TAG_BX_AGAGGTGTGTGG	55	A	C	146	15	117	A/C	0.1027	SNP
Lib10^4 1 ng	TAG_BX_AGAGGTTTGACG	55	A	C	164	27	126	A/C	0.1646	SNP
Lib10^4 1 ng	TAG_BX_AGAGTCTTATCG	69	T	C	166	39	120	T/C	0.2349	SNP
Lib10^4 1 ng	TAG_BX_AGAGTGAATCGC	55	A	C	150	18	120	A/C	0.12	SNP
Lib10^4 1 ng	TAG_BX_AGAGTGGCTCTG	69	T	C	44	9	32	T/C	0.2045	SNP
Lib10^4 1 ng	TAG_BX_AGAGTTTCTTAG	55	A	C	94	11	81	A/C	0.117	SNP
Lib10^4 1 ng	TAG_BX_AGAGTTTGTAAA	69	T	C	132	23	101	T/C	0.1742	SNP
Lib10^4 1 ng	TAG_BX_AGATCCGCTATT	69	T	C	198	36	155	T/C	0.1818	SNP
Lib10^4 1 ng	TAG_BX_AGATCCGCTATT	55	A	C	198	25	165	A/C	0.1263	SNP
Lib10^4 1 ng	TAG_BX_AGATCGAAAGCC	55	A	C	54	8	42	A/C	0.1481	SNP
Lib10^4 1 ng	TAG_BX_AGATCGTTGGCT	69	T	C	45	10	33	T/C	0.2222	SNP
Lib10^4 1 ng	TAG_BX_AGATCTGTAACT	55	A	C	71	14	52	A/C	0.1972	SNP
Lib10^4 1 ng	TAG_BX_AGATGATTCGGG	69	T	C	139	30	103	T/C	0.2158	SNP
Lib10^4 1 ng	TAG_BX_AGATTAGAAGAA	55	A	C	134	24	101	A/C	0.1791	SNP
Lib10^4 1 ng	TAG_BX_AGATTAGAAGAA	69	T	C	133	31	99	T/C	0.2331	SNP
Lib10^4 1 ng	TAG_BX_AGATTAGACGTG	55	A	C	132	19	95	A/C	0.1439	SNP
Lib10^4 1 ng	TAG_BX_AGATTCAGGTCT	58	T	G	53	7	43	T/G	0.1321	SNP
Lib10^4 1 ng	TAG_BX_AGATTCAGGTCT	54	T	C	53	7	45	T/C	0.1321	SNP
Lib10^4 1 ng	TAG_BX_AGATTGCATTCG	55	A	C	147	18	120	A/C	0.1224	SNP
Lib10^4 1 ng	TAG_BX_AGCAACTGACTG	69	T	C	106	25	79	T/C	0.2358	SNP
Lib10^4 1 ng	TAG_BX_AGCAACTGACTG	55	A	C	106	13	82	A/C	0.1226	SNP
Lib10^4 1 ng	TAG_BX_AGCAAGACGTGT	69	T	C	124	27	90	T/C	0.2177	SNP
Lib10^4 1 ng	TAG_BX_AGCAGATGTACT	55	A	C	175	29	135	A/C	0.1657	SNP
Lib10^4 1 ng	TAG_BX_AGCAGGATTGAA	55	A	C	89	11	69	A/C	0.1236	SNP
Lib10^4 1 ng	TAG_BX_AGCAGTGGTGGT	69	T	C	147	22	121	T/C	0.1497	SNP
Lib10^4 1 ng	TAG_BX_AGCATGATACTG	69	T	C	110	21	86	T/C	0.1909	SNP
Lib10^4 1 ng	TAG_BX_AGCATGATACTG	55	A	C	110	12	87	A/C	0.1091	SNP
Lib10^4 1 ng	TAG_BX_AGCATTAGTCTT	55	A	C	100	12	81	A/C	0.12	SNP
Lib10^4 1 ng	TAG_BX_AGCATTCCTTTC	69	T	C	91	17	72	T/C	0.1868	SNP
Lib10^4 1 ng	TAG_BX_AGCATTTCTGGG	55	A	C	145	17	112	A/C	0.1172	SNP
Lib10^4 1 ng	TAG_BX_AGCCACAGCTTA	69	T	C	162	35	123	T/C	0.216	SNP
Lib10^4 1 ng	TAG_BX_AGCCACGCATCA	69	T	C	157	35	119	T/C	0.2229	SNP
Lib10^4 1 ng	TAG_BX_AGCCAGGATCTC	69	T	C	174	44	125	T/C	0.2529	SNP
Lib10^4 1 ng	TAG_BX_AGCCAGGTCTTG	69	T	C	131	32	96	T/C	0.2443	SNP
Lib10^4 1 ng	TAG_BX_AGCCGACTGCTG	69	T	C	160	34	120	T/C	0.2125	SNP
Lib10^4 1 ng	TAG_BX_AGCCGTATGTGG	69	T	C	147	34	112	T/C	0.2313	SNP
Lib10^4 1 ng	TAG_BX_AGCCTGACTCCG	35	A	G	47	6	36	A/G	0.1277	SNP
Lib10^4 1 ng	TAG_BX_AGCCTGCGATGT	55	A	C	82	18	62	A/C	0.2195	SNP
Lib10^4 1 ng	TAG_BX_AGCCTGCGGGAT	69	T	C	150	39	106	T/C	0.26	SNP
Lib10^4 1 ng	TAG_BX_AGCCTGGTTCTC	69	T	C	233	51	174	T/C	0.2189	SNP
Lib10^4 1 ng	TAG_BX_AGCCTTAATACA	55	A	C	81	11	66	A/C	0.1358	SNP
Lib10^4 1 ng	TAG_BX_AGCCTTTATCTG	69	T	C	124	21	97	T/C	0.1694	SNP
Lib10^4 1 ng	TAG_BX_AGCGAAATTTTC	69	T	C	72	15	56	T/C	0.2083	SNP
Lib10^4 1 ng	TAG_BX_AGCGAACGGTAC	69	T	C	268	65	189	T/C	0.2425	SNP
Lib10^4 1 ng	TAG_BX_AGCGACACTGTC	69	T	C	119	32	84	T/C	0.2689	SNP
Lib10^4 1 ng	TAG_BX_AGCGAGGCGAGA	69	T	C	179	44	130	T/C	0.2458	SNP
Lib10^4 1 ng	TAG_BX_AGCGATTTGTAC	69	T	C	309	69	230	T/C	0.2233	SNP
Lib10^4 1 ng	TAG_BX_AGCGATTTTTTG	55	A	C	94	16	70	A/C	0.1702	SNP
Lib10^4 1 ng	TAG_BX_AGCGCCCTTTTT	69	T	C	146	33	110	T/C	0.226	SNP
Lib10^4 1 ng	TAG_BX_AGCGTATGTAAA	69	T	C	105	16	85	T/C	0.1524	SNP
Lib10^4 1 ng	TAG_BX_AGCGTATTTGGG	69	T	C	133	21	109	T/C	0.1579	SNP
Lib10^4 1 ng	TAG_BX_AGCGTCTCGATT	55	A	C	137	18	107	A/C	0.1314	SNP
Lib10^4 1 ng	TAG_BX_AGCTACTTGACC	69	T	C	127	25	98	T/C	0.1969	SNP
Lib10^4 1 ng	TAG_BX_AGCTAGCTACGA	69	T	C	175	34	135	T/C	0.1943	SNP
Lib10^4 1 ng	TAG_BX_AGCTGACGGTAC	69	T	C	161	33	122	T/C	0.205	SNP
Lib10^4 1 ng	TAG_BX_AGCTGGATTTTT	55	A	C	101	16	79	A/C	0.1584	SNP
Lib10^4 1 ng	TAG_BX_AGCTGGTGCTGG	69	T	C	105	26	74	T/C	0.2476	SNP
Lib10^4 1 ng	TAG_BX_AGCTGTAGCGAT	55	A	C	147	24	105	A/C	0.1633	SNP
Lib10^4 1 ng	TAG_BX_AGCTGTTTGCTG	55	A	C	167	28	128	A/C	0.1677	SNP
Lib10^4 1 ng	TAG_BX_AGCTGTTTGCTG	69	T	C	167	39	118	T/C	0.2335	SNP
Lib10^4 1 ng	TAG_BX_AGCTTACGACAG	55	A	C	81	15	61	A/C	0.1852	SNP
Lib10^4 1 ng	TAG_BX_AGCTTCATGCTG	69	T	C	129	33	91	T/C	0.2558	SNP
Lib10^4 1 ng	TAG_BX_AGCTTGATGGAT	69	T	C	177	45	124	T/C	0.2542	SNP
Lib10^4 1 ng	TAG_BX_AGGACACGGGTT	69	T	C	175	31	140	T/C	0.1771	SNP
Lib10^4 1 ng	TAG_BX_AGGACCCAGGTG	55	A	C	44	5	35	A/C	0.1136	SNP
Lib10^4 1 ng	TAG_BX_AGGACCGGATGA	69	T	C	95	23	67	T/C	0.2421	SNP
Lib10^4 1 ng	TAG_BX_AGGACTAGCTAT	69	T	C	122	25	92	T/C	0.2049	SNP
Lib10^4 1 ng	TAG_BX_AGGAGCTCGTGT	55	A	C	131	21	102	A/C	0.1603	SNP
Lib10^4 1 ng	TAG_BX_AGGAGGCACGTG	69	T	C	137	33	99	T/C	0.2409	SNP
Lib10^4 1 ng	TAG_BX_AGGAGGTACTCT	69	T	C	90	16	70	T/C	0.1778	SNP
Lib10^4 1 ng	TAG_BX_AGGAGGTACTCT	55	A	C	90	13	70	A/C	0.1444	SNP
Lib10^4 1 ng	TAG_BX_AGGAGGTTAATG	69	T	C	183	26	146	T/C	0.1421	SNP
Lib10^4 1 ng	TAG_BX_AGGATCTACTTA	69	T	C	148	28	118	T/C	0.1892	SNP
Lib10^4 1 ng	TAG_BX_AGGATGGTGGAT	69	T	C	84	15	62	T/C	0.1786	SNP
Lib10^4 1 ng	TAG_BX_AGGATTTGATAT	69	T	C	110	28	76	T/C	0.2545	SNP
Lib10^4 1 ng	TAG_BX_AGGATTTGGGTA	55	A	C	167	23	128	A/C	0.1377	SNP
Lib10^4 1 ng	TAG_BX_AGGCAATTGGTG	35	A	G	55	6	43	A/G	0.1091	SNP
Lib10^4 1 ng	TAG_BX_AGGCACACGAGG	55	A	C	178	18	147	A/C	0.1011	SNP
Lib10^4 1 ng	TAG_BX_AGGCACCGGACC	69	T	C	137	35	97	T/C	0.2555	SNP
Lib10^4 1 ng	TAG_BX_AGGCATTGTTGT	55	A	C	156	17	130	A/C	0.109	SNP
Lib10^4 1 ng	TAG_BX_AGGCCACTCACT	69	T	C	63	10	52	T/C	0.1587	SNP
Lib10^4 1 ng	TAG_BX_AGGCGGGTTTCG	55	A	C	92	13	73	A/C	0.1413	SNP
Lib10^4 1 ng	TAG_BX_AGGCGGTGCTCG	55	A	C	125	16	96	A/C	0.128	SNP
Lib10^4 1 ng	TAG_BX_AGGCGGTGTTTT	69	T	C	66	15	48	T/C	0.2273	SNP
Lib10^4 1 ng	TAG_BX_AGGCGTATAACG	69	T	C	133	28	104	T/C	0.2105	SNP
Lib10^4 1 ng	TAG_BX_AGGCGTATAACG	55	A	C	133	18	106	A/C	0.1353	SNP
Lib10^4 1 ng	TAG_BX_AGGCGTTCTCTG	69	T	C	114	28	78	T/C	0.2456	SNP
Lib10^4 1 ng	TAG_BX_AGGCTCTACCTA	55	A	C	56	8	43	A/C	0.1429	SNP
Lib10^4 1 ng	TAG_BX_AGGCTTAAAGGT	69	T	C	93	22	68	T/C	0.2366	SNP
Lib10^4 1 ng	TAG_BX_AGGCTTAATTTC	69	T	C	56	14	41	T/C	0.25	SNP
Lib10^4 1 ng	TAG_BX_AGGCTTACGAAT	55	A	C	85	20	61	A/C	0.2353	SNP
Lib10^4 1 ng	TAG_BX_AGGCTTTATTAA	50	G	C	48	5	41	G/C	0.1042	SNP
Lib10^4 1 ng	TAG_BX_AGGCTTTTAACA	69	T	C	160	39	115	T/C	0.2437	SNP
Lib10^4 1 ng	TAG_BX_AGGGAAATTAGG	69	T	C	91	10	77	T/C	0.1099	SNP
Lib10^4 1 ng	TAG_BX_AGGGAAGTCACA	69	T	C	42	11	31	T/C	0.2619	SNP
Lib10^4 1 ng	TAG_BX_AGGGAATATAGG	55	A	C	127	24	93	A/C	0.189	SNP
Lib10^4 1 ng	TAG_BX_AGGGACCCGACA	35	A	G	65	7	55	A/G	0.1077	SNP
Lib10^4 1 ng	TAG_BX_AGGGACTACATG	69	T	C	127	32	88	T/C	0.252	SNP
Lib10^4 1 ng	TAG_BX_AGGGAGGGGGTG	55	A	C	131	15	108	A/C	0.1145	SNP
Lib10^4 1 ng	TAG_BX_AGGGAGGGGGTG	69	T	C	131	28	99	T/C	0.2137	SNP
Lib10^4 1 ng	TAG_BX_AGGGAGTCATCA	69	T	C	121	32	87	T/C	0.2645	SNP
Lib10^4 1 ng	TAG_BX_AGGGATAAACAT	69	T	C	128	26	97	T/C	0.2031	SNP
Lib10^4 1 ng	TAG_BX_AGGGCTTGACCG	69	T	C	186	38	140	T/C	0.2043	SNP
Lib10^4 1 ng	TAG_BX_AGGGGAAGATTG	55	A	C	117	16	93	A/C	0.1368	SNP
Lib10^4 1 ng	TAG_BX_AGGGGATGGTAG	55	A	C	170	29	130	A/C	0.1706	SNP
Lib10^4 1 ng	TAG_BX_AGGGGATTCAAT	55	A	C	183	24	143	A/C	0.1311	SNP
Lib10^4 1 ng	TAG_BX_AGGGGATTCAAT	69	T	C	183	37	137	T/C	0.2022	SNP
Lib10^4 1 ng	TAG_BX_AGGGGCATTCTT	55	A	C	44	5	33	A/C	0.1136	SNP
Lib10^4 1 ng	TAG_BX_AGGGGCATTCTT	69	T	C	44	10	31	T/C	0.2273	SNP
Lib10^4 1 ng	TAG_BX_AGGGGCCTCTTA	55	A	C	174	20	140	A/C	0.1149	SNP
Lib10^4 1 ng	TAG_BX_AGGGGCTTCCTC	55	A	C	131	23	105	A/C	0.1756	SNP
Lib10^4 1 ng	TAG_BX_AGGGGGATGACT	55	A	C	247	40	192	A/C	0.1619	SNP
Lib10^4 1 ng	TAG_BX_AGGGGGCATTGC	69	T	C	126	15	102	T/C	0.119	SNP
Lib10^4 1 ng	TAG_BX_AGGGGGGATTGG	69	T	C	152	46	98	T/C	0.3026	SNP
Lib10^4 1 ng	TAG_BX_AGGGGTCCTTCC	69	T	C	74	18	53	T/C	0.2432	SNP
Lib10^4 1 ng	TAG_BX_AGGGGTCTGAGT	55	A	C	152	27	116	A/C	0.1776	SNP
Lib10^4 1 ng	TAG_BX_AGGGTATTCGGC	69	T	C	104	28	74	T/C	0.2692	SNP
Lib10^4 1 ng	TAG_BX_AGGGTGAGGGGA	69	T	C	94	18	74	T/C	0.1915	SNP
Lib10^4 1 ng	TAG_BX_AGGGTGTCCTGC	55	A	C	120	13	98	A/C	0.1083	SNP
Lib10^4 1 ng	TAG_BX_AGGTAGAGTGTT	-63	G	T	382	370	11	G/T	0.9686	SNP
Lib10^4 1 ng	TAG_BX_AGGTAGCAGCAA	55	A	C	189	22	151	A/C	0.1164	SNP
Lib10^4 1 ng	TAG_BX_AGGTAGCTGTGA	55	A	C	114	18	89	A/C	0.1579	SNP
Lib10^4 1 ng	TAG_BX_AGGTATCAGGGA	55	A	C	89	14	70	A/C	0.1573	SNP
Lib10^4 1 ng	TAG_BX_AGGTATCGTGTG	55	A	C	303	43	242	A/C	0.1419	SNP
Lib10^4 1 ng	TAG_BX_AGGTATGGTCTC	55	A	C	121	20	93	A/C	0.1653	SNP
Lib10^4 1 ng	TAG_BX_AGGTCAGCCGTC	69	T	C	85	15	68	T/C	0.1765	SNP
Lib10^4 1 ng	TAG_BX_AGGTCAGCCGTC	55	A	C	85	14	68	A/C	0.1647	SNP
Lib10^4 1 ng	TAG_BX_AGGTCCTGGTGA	69	T	C	77	19	58	T/C	0.2468	SNP
Lib10^4 1 ng	TAG_BX_AGGTCGTCTGTG	69	T	C	81	16	61	T/C	0.1975	SNP
Lib10^4 1 ng	TAG_BX_AGGTCGTTAGAT	69	T	C	76	20	54	T/C	0.2632	SNP
Lib10^4 1 ng	TAG_BX_AGGTCTATCTAT	63	T	G	43	6	36	T/G	0.1395	SNP
Lib10^4 1 ng	TAG_BX_AGGTCTCTATTA	55	A	C	81	20	58	A/C	0.2469	SNP
Lib10^4 1 ng	TAG_BX_AGGTCTCTATTA	69	T	C	81	19	62	T/C	0.2346	SNP
Lib10^4 1 ng	TAG_BX_AGGTGCAATTGG	63	T	G	139	16	122	T/G	0.1151	SNP
Lib10^4 1 ng	TAG_BX_AGGTGCGATGTG	69	T	C	106	23	81	T/C	0.217	SNP
Lib10^4 1 ng	TAG_BX_AGGTGTGATCAA	69	T	C	162	37	119	T/C	0.2284	SNP
Lib10^4 1 ng	TAG_BX_AGGTTCATGGAT	55	A	C	142	25	106	A/C	0.1761	SNP
Lib10^4 1 ng	TAG_BX_AGGTTCGGTGTG	69	T	C	180	41	132	T/C	0.2278	SNP
Lib10^4 1 ng	TAG_BX_AGGTTCTTATCG	69	T	C	120	39	74	T/C	0.325	SNP
Lib10^4 1 ng	TAG_BX_AGGTTGGCAATT	55	A	C	153	25	120	A/C	0.1634	SNP
Lib10^4 1 ng	TAG_BX_AGGTTTGGTGTT	69	T	C	121	15	95	T/C	0.124	SNP
Lib10^4 1 ng	TAG_BX_AGGTTTTATTAT	55	A	C	59	14	44	A/C	0.2373	SNP
Lib10^4 1 ng	TAG_BX_AGGTTTTATTAT	52	A	T	59	6	52	A/T	0.1017	SNP
Lib10^4 1 ng	TAG_BX_AGTAAGATTCTT	55	A	C	94	15	74	A/C	0.1596	SNP
Lib10^4 1 ng	TAG_BX_AGTAATTGATTC	69	T	C	126	25	97	T/C	0.1984	SNP
Lib10^4 1 ng	TAG_BX_AGTACCACTAGT	69	T	C	109	29	76	T/C	0.2661	SNP
Lib10^4 1 ng	TAG_BX_AGTACCACTAGT	55	A	C	109	21	82	A/C	0.1927	SNP
Lib10^4 1 ng	TAG_BX_AGTACGGCTAAG	55	A	C	166	29	125	A/C	0.1747	SNP
Lib10^4 1 ng	TAG_BX_AGTACTCAGTCG	60	T	G	78	10	65	T/G	0.1282	SNP
Lib10^4 1 ng	TAG_BX_AGTACTCTTAGG	69	T	C	145	28	108	T/C	0.1931	SNP
Lib10^4 1 ng	TAG_BX_AGTAGAGTAATT	69	T	C	173	40	125	T/C	0.2312	SNP
Lib10^4 1 ng	TAG_BX_AGTAGGATAGGA	69	T	C	88	20	60	T/C	0.2273	SNP
Lib10^4 1 ng	TAG_BX_AGTAGGGTTGTT	69	T	C	117	27	84	T/C	0.2308	SNP
Lib10^4 1 ng	TAG_BX_AGTAGGGTTGTT	55	A	C	117	16	91	A/C	0.1368	SNP
Lib10^4 1 ng	TAG_BX_AGTAGGTCTTTA	69	T	C	122	19	100	T/C	0.1557	SNP
Lib10^4 1 ng	TAG_BX_AGTAGGTGGGAG	55	A	C	120	17	95	A/C	0.1417	SNP
Lib10^4 1 ng	TAG_BX_AGTAGTTCATTT	69	T	C	157	38	115	T/C	0.242	SNP
Lib10^4 1 ng	TAG_BX_AGTAGTTTATGG	55	A	C	103	13	81	A/C	0.1262	SNP
Lib10^4 1 ng	TAG_BX_AGTATATGGGAT	63	T	G	59	11	46	T/G	0.1864	SNP
Lib10^4 1 ng	TAG_BX_AGTATATGGGAT	69	T	C	59	10	47	T/C	0.1695	SNP
Lib10^4 1 ng	TAG_BX_AGTATCCGTACC	69	T	C	108	27	75	T/C	0.25	SNP
Lib10^4 1 ng	TAG_BX_AGTATCCTGTGT	55	A	C	261	31	213	A/C	0.1188	SNP
Lib10^4 1 ng	TAG_BX_AGTATGATGCTA	55	A	C	86	11	72	A/C	0.1279	SNP
Lib10^4 1 ng	TAG_BX_AGTATGCTTCAG	69	T	C	75	13	59	T/C	0.1733	SNP
Lib10^4 1 ng	TAG_BX_AGTATTCACTAG	52	A	C	44	5	37	A/C	0.1136	SNP
Lib10^4 1 ng	TAG_BX_AGTATTGTATCG	69	T	C	118	26	85	T/C	0.2203	SNP
Lib10^4 1 ng	TAG_BX_AGTCAAACTGCT	55	A	C	193	25	157	A/C	0.1295	SNP
Lib10^4 1 ng	TAG_BX_AGTCCAATATAT	69	T	C	92	26	62	T/C	0.2826	SNP
Lib10^4 1 ng	TAG_BX_AGTCCCGCATTC	69	T	C	99	27	66	T/C	0.2727	SNP
Lib10^4 1 ng	TAG_BX_AGTCCGCTGAGC	69	T	C	110	24	82	T/C	0.2182	SNP
Lib10^4 1 ng	TAG_BX_AGTCCGGAAATA	69	T	C	146	24	118	T/C	0.1644	SNP
Lib10^4 1 ng	TAG_BX_AGTCCGTGTTTG	69	T	C	122	30	85	T/C	0.2459	SNP
Lib10^4 1 ng	TAG_BX_AGTCGGCCTAGC	69	T	C	95	28	61	T/C	0.2947	SNP
Lib10^4 1 ng	TAG_BX_AGTCGTTGAGGA	69	T	C	75	19	54	T/C	0.2533	SNP
Lib10^4 1 ng	TAG_BX_AGTCTATTTGTA	55	A	C	123	21	91	A/C	0.1707	SNP
Lib10^4 1 ng	TAG_BX_AGTCTCTTTCTT	69	T	C	106	24	77	T/C	0.2264	SNP
Lib10^4 1 ng	TAG_BX_AGTCTGACGATC	69	T	C	158	36	115	T/C	0.2278	SNP
Lib10^4 1 ng	TAG_BX_AGTCTGCGTGGT	55	A	C	159	20	131	A/C	0.1258	SNP
Lib10^4 1 ng	TAG_BX_AGTCTTGGGTCG	69	T	C	183	36	136	T/C	0.1967	SNP
Lib10^4 1 ng	TAG_BX_AGTCTTTCGTTC	58	T	G	84	10	72	T/G	0.119	SNP
Lib10^4 1 ng	TAG_BX_AGTGACTCTTGA	69	T	C	150	30	114	T/C	0.2	SNP
Lib10^4 1 ng	TAG_BX_AGTGAGGAATCC	55	A	C	65	8	53	A/C	0.1231	SNP
Lib10^4 1 ng	TAG_BX_AGTGCCTCCGCT	63	T	G	54	7	45	T/G	0.1296	SNP
Lib10^4 1 ng	TAG_BX_AGTGCTCTCCAA	55	A	C	179	20	143	A/C	0.1117	SNP
Lib10^4 1 ng	TAG_BX_AGTGCTCTTTTA	38	A	G	86	9	74	A/G	0.1047	SNP
Lib10^4 1 ng	TAG_BX_AGTGCTTGAGGT	55	A	C	59	6	50	A/C	0.1017	SNP
Lib10^4 1 ng	TAG_BX_AGTGGCTGTCGT	69	T	C	139	36	92	T/C	0.259	SNP
Lib10^4 1 ng	TAG_BX_AGTGGGATACTC	69	T	C	125	30	92	T/C	0.24	SNP
Lib10^4 1 ng	TAG_BX_AGTGGGATTCTT	69	T	C	45	11	32	T/C	0.2444	SNP
Lib10^4 1 ng	TAG_BX_AGTGGGCAGTTG	55	A	C	153	17	125	A/C	0.1111	SNP
Lib10^4 1 ng	TAG_BX_AGTGGGCTAGAC	69	T	C	96	18	73	T/C	0.1875	SNP
Lib10^4 1 ng	TAG_BX_AGTGGGGATTTG	55	A	C	48	5	42	A/C	0.1042	SNP
Lib10^4 1 ng	TAG_BX_AGTGGGGATTTG	69	T	C	48	10	36	T/C	0.2083	SNP
Lib10^4 1 ng	TAG_BX_AGTGGTCGATTT	69	T	C	81	10	68	T/C	0.1235	SNP
Lib10^4 1 ng	TAG_BX_AGTGGTTTTTCG	38	A	G	109	12	93	A/G	0.1101	SNP
Lib10^4 1 ng	TAG_BX_AGTGTGGCGATA	55	A	C	119	15	97	A/C	0.1261	SNP
Lib10^4 1 ng	TAG_BX_AGTGTTTGATTT	69	T	C	136	41	89	T/C	0.3015	SNP
Lib10^4 1 ng	TAG_BX_AGTTAAATGTAG	69	T	C	150	34	110	T/C	0.2267	SNP
Lib10^4 1 ng	TAG_BX_AGTTACCTGGAG	35	A	G	77	8	64	A/G	0.1039	SNP
Lib10^4 1 ng	TAG_BX_AGTTACCTGGAG	55	A	C	77	11	64	A/C	0.1429	SNP
Lib10^4 1 ng	TAG_BX_AGTTACCTGGAG	69	T	C	77	20	55	T/C	0.2597	SNP
Lib10^4 1 ng	TAG_BX_AGTTACTATAAT	55	A	C	81	12	60	A/C	0.1481	SNP
Lib10^4 1 ng	TAG_BX_AGTTACTATAAT	69	T	C	81	19	59	T/C	0.2346	SNP
Lib10^4 1 ng	TAG_BX_AGTTAGAGAAAA	55	A	C	57	11	42	A/C	0.193	SNP
Lib10^4 1 ng	TAG_BX_AGTTAGAGAAAA	69	T	C	57	14	39	T/C	0.2456	SNP
Lib10^4 1 ng	TAG_BX_AGTTAGCAGCGT	69	T	C	169	39	125	T/C	0.2308	SNP
Lib10^4 1 ng	TAG_BX_AGTTATATTGGA	69	T	C	67	14	51	T/C	0.209	SNP
Lib10^4 1 ng	TAG_BX_AGTTATTGATGA	69	T	C	131	26	98	T/C	0.1985	SNP
Lib10^4 1 ng	TAG_BX_AGTTATTTGGTT	69	T	C	174	28	135	T/C	0.1609	SNP
Lib10^4 1 ng	TAG_BX_AGTTCACATACA	55	A	C	155	21	128	A/C	0.1355	SNP
Lib10^4 1 ng	TAG_BX_AGTTCGATTGTT	69	T	C	90	19	64	T/C	0.2111	SNP
Lib10^4 1 ng	TAG_BX_AGTTCGGATGAT	69	T	C	144	27	108	T/C	0.1875	SNP
Lib10^4 1 ng	TAG_BX_AGTTCTCCCTAT	69	T	C	208	43	158	T/C	0.2067	SNP
Lib10^4 1 ng	TAG_BX_AGTTGAGGAGGT	52	A	C	90	10	75	A/C	0.1111	SNP
Lib10^4 1 ng	TAG_BX_AGTTGAGGAGGT	55	A	C	90	17	68	A/C	0.1889	SNP
Lib10^4 1 ng	TAG_BX_AGTTGAGGAGGT	69	T	C	90	21	62	T/C	0.2333	SNP
Lib10^4 1 ng	TAG_BX_AGTTGCGATAAT	69	T	C	174	30	136	T/C	0.1724	SNP
Lib10^4 1 ng	TAG_BX_AGTTGCGCCTTG	55	A	C	128	13	107	A/C	0.1016	SNP
Lib10^4 1 ng	TAG_BX_AGTTGCGCCTTG	69	T	C	128	26	100	T/C	0.2031	SNP
Lib10^4 1 ng	TAG_BX_AGTTGCGTCCTG	69	T	C	59	12	44	T/C	0.2034	SNP
Lib10^4 1 ng	TAG_BX_AGTTGGTGGGTG	69	T	C	84	19	61	T/C	0.2262	SNP
Lib10^4 1 ng	TAG_BX_AGTTGTCCTGGT	69	T	C	132	22	104	T/C	0.1667	SNP
Lib10^4 1 ng	TAG_BX_AGTTGTCTGGTG	133	T	C	47	5	41	T/C	0.1064	SNP
Lib10^4 1 ng	TAG_BX_AGTTGTTCGAGT	55	A	C	186	22	155	A/C	0.1183	SNP
Lib10^4 1 ng	TAG_BX_AGTTGTTTCGTG	69	T	C	154	40	110	T/C	0.2597	SNP
Lib10^4 1 ng	TAG_BX_AGTTTAAGTCGG	55	A	C	141	20	112	A/C	0.1418	SNP
Lib10^4 1 ng	TAG_BX_AGTTTAGGCCTG	69	T	C	116	29	82	T/C	0.25	SNP
Lib10^4 1 ng	TAG_BX_AGTTTAGGCCTG	55	A	C	116	18	90	A/C	0.1552	SNP
Lib10^4 1 ng	TAG_BX_AGTTTCCCGTTA	69	T	C	129	21	105	T/C	0.1628	SNP
Lib10^4 1 ng	TAG_BX_AGTTTCTGTTTA	55	A	C	106	21	82	A/C	0.1981	SNP
Lib10^4 1 ng	TAG_BX_AGTTTGAACGGC	55	A	C	135	26	102	A/C	0.1926	SNP
Lib10^4 1 ng	TAG_BX_AGTTTGGTCGAT	36	G	C	53	8	44	G/C	0.1509	SNP
Lib10^4 1 ng	TAG_BX_AGTTTGTGCATC	69	T	C	160	35	117	T/C	0.2188	SNP
Lib10^4 1 ng	TAG_BX_AGTTTGTGTGGC	55	A	C	110	13	91	A/C	0.1182	SNP
Lib10^4 1 ng	TAG_BX_AGTTTTCACGTG	55	A	C	85	12	63	A/C	0.1412	SNP
Lib10^4 1 ng	TAG_BX_AGTTTTGCTCGG	55	A	C	194	25	156	A/C	0.1289	SNP
Lib10^4 1 ng	TAG_BX_AGTTTTTCTTTT	55	A	C	94	11	75	A/C	0.117	SNP
Lib10^4 1 ng	TAG_BX_AGTTTTTTTCTC	69	T	C	123	23	93	T/C	0.187	SNP
Lib10^4 1 ng	TAG_BX_ATAACCACCATG	69	T	C	157	31	116	T/C	0.1975	SNP
Lib10^4 1 ng	TAG_BX_ATAACCCAAGGC	69	T	C	137	31	98	T/C	0.2263	SNP
Lib10^4 1 ng	TAG_BX_ATAACCCAAGGC	55	A	C	137	20	107	A/C	0.146	SNP
Lib10^4 1 ng	TAG_BX_ATAACTAGATTC	55	A	C	165	21	134	A/C	0.1273	SNP
Lib10^4 1 ng	TAG_BX_ATAACTTTATGC	69	T	C	86	20	64	T/C	0.2326	SNP
Lib10^4 1 ng	TAG_BX_ATAAGCAGTTGT	69	T	C	110	30	76	T/C	0.2727	SNP
Lib10^4 1 ng	TAG_BX_ATAAGGCGGAAT	69	T	C	161	31	122	T/C	0.1925	SNP
Lib10^4 1 ng	TAG_BX_ATAAGGTTTAGT	69	T	C	62	13	49	T/C	0.2097	SNP
Lib10^4 1 ng	TAG_BX_ATAATGATTAGT	69	T	C	122	19	99	T/C	0.1557	SNP
Lib10^4 1 ng	TAG_BX_ATAATGTATTTA	69	T	C	49	6	40	T/C	0.1224	SNP
Lib10^4 1 ng	TAG_BX_ATAATTATACTG	69	T	C	111	24	84	T/C	0.2162	SNP
Lib10^4 1 ng	TAG_BX_ATAATTGTATCT	69	T	C	115	29	78	T/C	0.2522	SNP
Lib10^4 1 ng	TAG_BX_ATAATTGTCGGG	69	T	C	110	21	85	T/C	0.1909	SNP
Lib10^4 1 ng	TAG_BX_ATACAATCGGAT	35	A	G	72	8	63	A/G	0.1111	SNP
Lib10^4 1 ng	TAG_BX_ATACAATCGGAT	69	T	C	73	21	50	T/C	0.2877	SNP
Lib10^4 1 ng	TAG_BX_ATACAATGTATG	60	T	G	59	6	49	T/G	0.1017	SNP
Lib10^4 1 ng	TAG_BX_ATACAATTTGTG	69	T	C	96	14	76	T/C	0.1458	SNP
Lib10^4 1 ng	TAG_BX_ATACAGAGTATT	69	T	C	213	48	151	T/C	0.2254	SNP
Lib10^4 1 ng	TAG_BX_ATACCAGGCGTT	69	T	C	138	30	100	T/C	0.2174	SNP
Lib10^4 1 ng	TAG_BX_ATACCGGGTTCG	69	T	C	189	33	150	T/C	0.1746	SNP
Lib10^4 1 ng	TAG_BX_ATACCGGTGAAA	69	T	C	108	22	81	T/C	0.2037	SNP
Lib10^4 1 ng	TAG_BX_ATACCTTACGCA	69	T	C	156	29	123	T/C	0.1859	SNP
Lib10^4 1 ng	TAG_BX_ATACCTTACGCA	55	A	C	156	20	132	A/C	0.1282	SNP
Lib10^4 1 ng	TAG_BX_ATACGACGTTCC	55	A	C	154	21	123	A/C	0.1364	SNP
Lib10^4 1 ng	TAG_BX_ATACGACGTTCC	69	T	C	154	30	115	T/C	0.1948	SNP
Lib10^4 1 ng	TAG_BX_ATACGGTTTTCG	69	T	C	143	25	104	T/C	0.1748	SNP
Lib10^4 1 ng	TAG_BX_ATACGTCGGAAG	55	A	C	76	11	55	A/C	0.1447	SNP
Lib10^4 1 ng	TAG_BX_ATACGTGATCTG	55	A	C	57	8	44	A/C	0.1404	SNP
Lib10^4 1 ng	TAG_BX_ATACGTGATCTG	69	T	C	57	12	42	T/C	0.2105	SNP
Lib10^4 1 ng	TAG_BX_ATACGTTATCTC	69	T	C	84	15	64	T/C	0.1786	SNP
Lib10^4 1 ng	TAG_BX_ATACGTTATCTC	55	A	C	84	14	66	A/C	0.1667	SNP
Lib10^4 1 ng	TAG_BX_ATACTCATCATG	69	T	C	86	20	62	T/C	0.2326	SNP
Lib10^4 1 ng	TAG_BX_ATACTGCACATA	69	T	C	125	31	91	T/C	0.248	SNP
Lib10^4 1 ng	TAG_BX_ATACTGTGACCG	69	T	C	146	33	104	T/C	0.226	SNP
Lib10^4 1 ng	TAG_BX_ATAGACATCGGG	69	T	C	166	32	130	T/C	0.1928	SNP
Lib10^4 1 ng	TAG_BX_ATAGCCTAGATT	69	T	C	127	28	93	T/C	0.2205	SNP
Lib10^4 1 ng	TAG_BX_ATAGGGAAAGCG	55	A	C	81	18	57	A/C	0.2222	SNP
Lib10^4 1 ng	TAG_BX_ATAGGGAAAGCG	60	T	G	81	11	69	T/G	0.1358	SNP
Lib10^4 1 ng	TAG_BX_ATAGGGGTGATT	52	A	C	57	6	48	A/C	0.1053	SNP
Lib10^4 1 ng	TAG_BX_ATAGGTCACGGT	69	T	C	113	25	84	T/C	0.2212	SNP
Lib10^4 1 ng	TAG_BX_ATAGTAAGGGGA	68	T	C	55	6	39	T/C	0.1091	SNP
Lib10^4 1 ng	TAG_BX_ATAGTAAGGGGA	55	A	C	55	8	44	A/C	0.1455	SNP
Lib10^4 1 ng	TAG_BX_ATAGTAGATGAA	55	A	C	93	14	74	A/C	0.1505	SNP
Lib10^4 1 ng	TAG_BX_ATAGTAGTGATG	55	A	C	223	41	164	A/C	0.1839	SNP
Lib10^4 1 ng	TAG_BX_ATAGTAGTGATG	69	T	C	223	39	178	T/C	0.1749	SNP
Lib10^4 1 ng	TAG_BX_ATAGTATACCAT	69	T	C	109	27	76	T/C	0.2477	SNP
Lib10^4 1 ng	TAG_BX_ATAGTATGGAGA	69	T	C	160	37	114	T/C	0.2313	SNP
Lib10^4 1 ng	TAG_BX_ATAGTATGGAGA	55	A	C	160	19	131	A/C	0.1187	SNP
Lib10^4 1 ng	TAG_BX_ATAGTGAACCTC	69	T	C	114	22	85	T/C	0.193	SNP
Lib10^4 1 ng	TAG_BX_ATAGTTACAAGA	69	T	C	154	27	123	T/C	0.1753	SNP
Lib10^4 1 ng	TAG_BX_ATAGTTGTTTCT	69	T	C	169	36	130	T/C	0.213	SNP
Lib10^4 1 ng	TAG_BX_ATATAATTAGTA	55	A	C	159	18	133	A/C	0.1132	SNP
Lib10^4 1 ng	TAG_BX_ATATAGGATATG	69	T	C	143	33	107	T/C	0.2308	SNP
Lib10^4 1 ng	TAG_BX_ATATAGGTGGGC	60	T	G	95	16	75	T/G	0.1684	SNP
Lib10^4 1 ng	TAG_BX_ATATATACTTAT	69	T	C	110	23	82	T/C	0.2091	SNP
Lib10^4 1 ng	TAG_BX_ATATATACTTAT	63	T	G	110	14	94	T/G	0.1273	SNP
Lib10^4 1 ng	TAG_BX_ATATATCGTTGG	69	T	C	100	21	74	T/C	0.21	SNP
Lib10^4 1 ng	TAG_BX_ATATCGCTCTGC	69	T	C	113	26	83	T/C	0.2301	SNP
Lib10^4 1 ng	TAG_BX_ATATCTGTGGGC	55	A	C	198	31	158	A/C	0.1566	SNP
Lib10^4 1 ng	TAG_BX_ATATGAATAACG	69	T	C	41	6	33	T/C	0.1463	SNP
Lib10^4 1 ng	TAG_BX_ATATGGCGCTTT	35	A	G	62	8	50	A/G	0.129	SNP
Lib10^4 1 ng	TAG_BX_ATATGGCTGTGT	69	T	C	191	41	140	T/C	0.2147	SNP
Lib10^4 1 ng	TAG_BX_ATATGTGTCCAA	55	A	C	79	11	65	A/C	0.1392	SNP
Lib10^4 1 ng	TAG_BX_ATATGTGTCCAA	60	T	G	79	8	71	T/G	0.1013	SNP
Lib10^4 1 ng	TAG_BX_ATATGTTTCCTG	69	T	C	54	8	44	T/C	0.1481	SNP
Lib10^4 1 ng	TAG_BX_ATATGTTTCCTG	60	T	G	54	9	45	T/G	0.1667	SNP
Lib10^4 1 ng	TAG_BX_ATATTAACTATA	69	T	C	64	18	41	T/C	0.2812	SNP
Lib10^4 1 ng	TAG_BX_ATATTAGTATTT	55	A	C	116	17	91	A/C	0.1466	SNP
Lib10^4 1 ng	TAG_BX_ATATTCATTCAC	55	A	C	104	14	82	A/C	0.1346	SNP
Lib10^4 1 ng	TAG_BX_ATATTCTACAGA	55	A	C	112	17	87	A/C	0.1518	SNP
Lib10^4 1 ng	TAG_BX_ATATTGGTCGAA	69	T	C	117	28	85	T/C	0.2393	SNP
Lib10^4 1 ng	TAG_BX_ATATTGTAGTCT	55	A	C	92	10	77	A/C	0.1087	SNP
Lib10^4 1 ng	TAG_BX_ATATTGTTGTGT	69	T	C	76	14	60	T/C	0.1842	SNP
Lib10^4 1 ng	TAG_BX_ATATTTGAAGGT	69	T	C	89	18	67	T/C	0.2022	SNP
Lib10^4 1 ng	TAG_BX_ATATTTTCATGA	52	A	T	109	12	92	A/T	0.1101	SNP
Lib10^4 1 ng	TAG_BX_ATATTTTCATGA	69	T	C	109	19	85	T/C	0.1743	SNP
Lib10^4 1 ng	TAG_BX_ATATTTTGGTTA	69	T	C	46	12	33	T/C	0.2609	SNP
Lib10^4 1 ng	TAG_BX_ATCAAAACCGCC	55	A	C	84	11	68	A/C	0.131	SNP
Lib10^4 1 ng	TAG_BX_ATCAAATGTGCG	69	T	C	184	31	149	T/C	0.1685	SNP
Lib10^4 1 ng	TAG_BX_ATCAAATGTGCG	55	A	C	184	23	146	A/C	0.125	SNP
Lib10^4 1 ng	TAG_BX_ATCAACGTCCAG	55	A	C	134	16	112	A/C	0.1194	SNP
Lib10^4 1 ng	TAG_BX_ATCAACGTCCAG	69	T	C	134	35	96	T/C	0.2612	SNP
Lib10^4 1 ng	TAG_BX_ATCAATCAATCT	55	A	C	104	16	77	A/C	0.1538	SNP
Lib10^4 1 ng	TAG_BX_ATCACGCCCAAA	69	T	C	53	16	37	T/C	0.3019	SNP
Lib10^4 1 ng	TAG_BX_ATCACGTCGAGC	69	T	C	85	17	64	T/C	0.2	SNP
Lib10^4 1 ng	TAG_BX_ATCACTACTATC	69	T	C	117	15	96	T/C	0.1282	SNP
Lib10^4 1 ng	TAG_BX_ATCACTCATTAG	69	T	C	103	21	75	T/C	0.2039	SNP
Lib10^4 1 ng	TAG_BX_ATCAGCGTAATT	69	T	C	61	9	52	T/C	0.1475	SNP
Lib10^4 1 ng	TAG_BX_ATCAGCTTCCTT	55	A	C	143	19	114	A/C	0.1329	SNP
Lib10^4 1 ng	TAG_BX_ATCAGTTATTTG	69	T	C	153	27	120	T/C	0.1765	SNP
Lib10^4 1 ng	TAG_BX_ATCAGTTTAGTA	69	T	C	132	25	103	T/C	0.1894	SNP
Lib10^4 1 ng	TAG_BX_ATCATATCATCT	55	A	C	98	17	76	A/C	0.1735	SNP
Lib10^4 1 ng	TAG_BX_ATCATATCTTCC	69	T	C	115	24	83	T/C	0.2087	SNP
Lib10^4 1 ng	TAG_BX_ATCATCGTCCAT	69	T	C	184	50	128	T/C	0.2717	SNP
Lib10^4 1 ng	TAG_BX_ATCATGCGATGC	69	T	C	155	33	116	T/C	0.2129	SNP
Lib10^4 1 ng	TAG_BX_ATCATGCTTAAA	55	A	C	166	19	138	A/C	0.1145	SNP
Lib10^4 1 ng	TAG_BX_ATCATTATTGGA	69	T	C	120	27	91	T/C	0.225	SNP
Lib10^4 1 ng	TAG_BX_ATCATTCTGCGT	55	A	C	112	14	93	A/C	0.125	SNP
Lib10^4 1 ng	TAG_BX_ATCCAACCGCGC	69	T	C	90	15	70	T/C	0.1667	SNP
Lib10^4 1 ng	TAG_BX_ATCCACGAGTCC	69	T	C	133	31	97	T/C	0.2331	SNP
Lib10^4 1 ng	TAG_BX_ATCCACTTAGGA	69	T	C	89	22	65	T/C	0.2472	SNP
Lib10^4 1 ng	TAG_BX_ATCCATTCCTCA	69	T	C	139	25	108	T/C	0.1799	SNP
Lib10^4 1 ng	TAG_BX_ATCCATTCCTCA	55	A	C	139	19	107	A/C	0.1367	SNP
Lib10^4 1 ng	TAG_BX_ATCCATTCCTCA	60	T	G	139	14	119	T/G	0.1007	SNP
Lib10^4 1 ng	TAG_BX_ATCCATTGGGAT	55	A	C	87	19	61	A/C	0.2184	SNP
Lib10^4 1 ng	TAG_BX_ATCCCCTTGTAT	55	A	C	114	21	84	A/C	0.1842	SNP
Lib10^4 1 ng	TAG_BX_ATCCCGATATCG	69	T	C	75	23	51	T/C	0.3067	SNP
Lib10^4 1 ng	TAG_BX_ATCCCGATATCG	55	A	C	75	8	58	A/C	0.1067	SNP
Lib10^4 1 ng	TAG_BX_ATCCCTCTTGCC	69	T	C	72	12	57	T/C	0.1667	SNP
Lib10^4 1 ng	TAG_BX_ATCCGGCTAGTC	69	T	C	117	23	87	T/C	0.1966	SNP
Lib10^4 1 ng	TAG_BX_ATCCGGCTAGTC	55	A	C	117	16	94	A/C	0.1368	SNP
Lib10^4 1 ng	TAG_BX_ATCCGGCTCGTA	69	T	C	201	38	158	T/C	0.1891	SNP
Lib10^4 1 ng	TAG_BX_ATCCTGTTTGTG	55	A	C	162	29	125	A/C	0.179	SNP
Lib10^4 1 ng	TAG_BX_ATCCTTGTACTC	55	A	C	114	13	99	A/C	0.114	SNP
Lib10^4 1 ng	TAG_BX_ATCCTTTATTTC	69	T	C	91	18	70	T/C	0.1978	SNP
Lib10^4 1 ng	TAG_BX_ATCGACCTTGGT	55	A	C	181	33	133	A/C	0.1823	SNP
Lib10^4 1 ng	TAG_BX_ATCGAGATATAA	55	A	C	118	19	95	A/C	0.161	SNP
Lib10^4 1 ng	TAG_BX_ATCGCGCAGGCA	69	T	C	174	40	124	T/C	0.2299	SNP
Lib10^4 1 ng	TAG_BX_ATCGCTTGGCTC	55	A	C	143	22	106	A/C	0.1538	SNP
Lib10^4 1 ng	TAG_BX_ATCGGCCCGAGG	69	T	C	130	39	85	T/C	0.3	SNP
Lib10^4 1 ng	TAG_BX_ATCGGTAATCGT	55	A	C	119	16	93	A/C	0.1345	SNP
Lib10^4 1 ng	TAG_BX_ATCGGTCCCGCC	55	A	C	104	14	77	A/C	0.1346	SNP
Lib10^4 1 ng	TAG_BX_ATCGGTTAATTT	69	T	C	158	31	126	T/C	0.1962	SNP
Lib10^4 1 ng	TAG_BX_ATCGTAACTCGT	69	T	C	137	34	95	T/C	0.2482	SNP
Lib10^4 1 ng	TAG_BX_ATCGTAGCCTGT	69	T	C	166	39	121	T/C	0.2349	SNP
Lib10^4 1 ng	TAG_BX_ATCGTCCCTTAG	69	T	C	170	30	133	T/C	0.1765	SNP
Lib10^4 1 ng	TAG_BX_ATCGTCTATATT	69	T	C	69	14	52	T/C	0.2029	SNP
Lib10^4 1 ng	TAG_BX_ATCGTCTTGCTA	63	T	G	57	7	49	T/G	0.1228	SNP
Lib10^4 1 ng	TAG_BX_ATCGTCTTGCTA	75	G	C	57	7	48	G/C	0.1228	SNP
Lib10^4 1 ng	TAG_BX_ATCGTGGCACAG	69	T	C	174	34	131	T/C	0.1954	SNP
Lib10^4 1 ng	TAG_BX_ATCGTGTGATCG	53	T	C	99	10	85	T/C	0.101	SNP
Lib10^4 1 ng	TAG_BX_ATCGTGTGTTAA	55	A	C	116	12	100	A/C	0.1034	SNP
Lib10^4 1 ng	TAG_BX_ATCGTTAAAGCC	38	A	G	56	6	45	A/G	0.1071	SNP
Lib10^4 1 ng	TAG_BX_ATCGTTAAAGCC	69	T	C	56	6	48	T/C	0.1071	SNP
Lib10^4 1 ng	TAG_BX_ATCGTTAAAGCC	63	T	G	56	8	47	T/G	0.1429	SNP
Lib10^4 1 ng	TAG_BX_ATCTAAACGTTT	55	A	C	146	15	122	A/C	0.1027	SNP
Lib10^4 1 ng	TAG_BX_ATCTAAACGTTT	69	T	C	147	33	106	T/C	0.2245	SNP
Lib10^4 1 ng	TAG_BX_ATCTAAGTACAT	55	A	C	99	15	81	A/C	0.1515	SNP
Lib10^4 1 ng	TAG_BX_ATCTAATTAAGG	69	T	C	110	18	91	T/C	0.1636	SNP
Lib10^4 1 ng	TAG_BX_ATCTACTTTCTA	69	T	C	83	13	67	T/C	0.1566	SNP
Lib10^4 1 ng	TAG_BX_ATCTAGATGTAT	55	A	C	50	5	35	A/C	0.1	SNP
Lib10^4 1 ng	TAG_BX_ATCTCCGTGCCC	55	A	C	68	12	52	A/C	0.1765	SNP
Lib10^4 1 ng	TAG_BX_ATCTCCGTGCCC	69	T	C	68	16	48	T/C	0.2353	SNP
Lib10^4 1 ng	TAG_BX_ATCTCGCACACA	55	A	C	57	12	40	A/C	0.2105	SNP
Lib10^4 1 ng	TAG_BX_ATCTCGCCGGTA	69	T	C	156	34	117	T/C	0.2179	SNP
Lib10^4 1 ng	TAG_BX_ATCTCGCCGGTA	68	T	C	157	17	130	T/C	0.1083	SNP
Lib10^4 1 ng	TAG_BX_ATCTCTACAGCT	69	T	C	93	20	68	T/C	0.2151	SNP
Lib10^4 1 ng	TAG_BX_ATCTGAAGGGTG	69	T	C	150	43	97	T/C	0.2867	SNP
Lib10^4 1 ng	TAG_BX_ATCTGCGCTTTT	69	T	C	120	28	89	T/C	0.2333	SNP
Lib10^4 1 ng	TAG_BX_ATCTTACGACAT	55	A	C	130	14	105	A/C	0.1077	SNP
Lib10^4 1 ng	TAG_BX_ATCTTCCTCCTA	55	A	C	108	15	87	A/C	0.1389	SNP
Lib10^4 1 ng	TAG_BX_ATCTTGATCTGG	55	A	C	125	25	92	A/C	0.2	SNP
Lib10^4 1 ng	TAG_BX_ATCTTGGGTTCA	69	T	C	160	36	113	T/C	0.225	SNP
Lib10^4 1 ng	TAG_BX_ATCTTTTAATAG	69	T	C	61	16	41	T/C	0.2623	SNP
Lib10^4 1 ng	TAG_BX_ATCTTTTCCCTG	69	T	C	114	25	88	T/C	0.2193	SNP
Lib10^4 1 ng	TAG_BX_ATCTTTTGCGTT	55	A	C	125	20	98	A/C	0.16	SNP
Lib10^4 1 ng	TAG_BX_ATCTTTTGTCTC	69	T	C	62	12	48	T/C	0.1935	SNP
Lib10^4 1 ng	TAG_BX_ATCTTTTTATCG	55	A	C	104	24	73	A/C	0.2308	SNP
Lib10^4 1 ng	TAG_BX_ATGAAAGCTTCG	69	T	C	124	26	93	T/C	0.2097	SNP
Lib10^4 1 ng	TAG_BX_ATGAAAGCTTCG	55	A	C	124	16	100	A/C	0.129	SNP
Lib10^4 1 ng	TAG_BX_ATGAACATATTT	69	T	C	114	18	91	T/C	0.1579	SNP
Lib10^4 1 ng	TAG_BX_ATGAACTCTTTG	55	A	C	131	20	108	A/C	0.1527	SNP
Lib10^4 1 ng	TAG_BX_ATGAATGAAATT	69	T	C	155	28	123	T/C	0.1806	SNP
Lib10^4 1 ng	TAG_BX_ATGACATCAAAT	55	A	C	147	20	120	A/C	0.1361	SNP
Lib10^4 1 ng	TAG_BX_ATGACGCGACGA	69	T	C	155	38	111	T/C	0.2452	SNP
Lib10^4 1 ng	TAG_BX_ATGACGCTGGAC	69	T	C	172	28	139	T/C	0.1628	SNP
Lib10^4 1 ng	TAG_BX_ATGACTTCTCGT	55	A	C	54	6	41	A/C	0.1111	SNP
Lib10^4 1 ng	TAG_BX_ATGACTTCTCGT	69	T	C	52	11	39	T/C	0.2115	SNP
Lib10^4 1 ng	TAG_BX_ATGAGCGATGAT	69	T	C	214	49	154	T/C	0.229	SNP
Lib10^4 1 ng	TAG_BX_ATGAGCTATGGT	69	T	C	176	33	137	T/C	0.1875	SNP
Lib10^4 1 ng	TAG_BX_ATGAGCTCTGAG	69	T	C	189	41	143	T/C	0.2169	SNP
Lib10^4 1 ng	TAG_BX_ATGAGGATTTAA	69	T	C	196	39	151	T/C	0.199	SNP
Lib10^4 1 ng	TAG_BX_ATGATATGGATT	55	A	C	177	22	140	A/C	0.1243	SNP
Lib10^4 1 ng	TAG_BX_ATGATGTGGAAT	69	T	C	71	15	55	T/C	0.2113	SNP
Lib10^4 1 ng	TAG_BX_ATGATGTGGAAT	55	A	C	71	8	54	A/C	0.1127	SNP
Lib10^4 1 ng	TAG_BX_ATGCAGGACAAG	55	A	C	78	9	63	A/C	0.1154	SNP
Lib10^4 1 ng	TAG_BX_ATGCAGTTCCCA	69	T	C	60	15	42	T/C	0.25	SNP
Lib10^4 1 ng	TAG_BX_ATGCCTAAAACC	55	A	C	59	8	49	A/C	0.1356	SNP
Lib10^4 1 ng	TAG_BX_ATGCCTAAAACC	69	T	C	59	15	41	T/C	0.2542	SNP
Lib10^4 1 ng	TAG_BX_ATGCCTCTACTA	69	T	C	99	18	76	T/C	0.1818	SNP
Lib10^4 1 ng	TAG_BX_ATGCCTGCGTTA	69	T	C	176	33	135	T/C	0.1875	SNP
Lib10^4 1 ng	TAG_BX_ATGCCTGCGTTA	55	A	C	176	29	135	A/C	0.1648	SNP
Lib10^4 1 ng	TAG_BX_ATGCGAGTTCGT	55	A	C	257	34	196	A/C	0.1323	SNP
Lib10^4 1 ng	TAG_BX_ATGCGCCAATTC	55	A	C	147	21	119	A/C	0.1429	SNP
Lib10^4 1 ng	TAG_BX_ATGCGCCACATG	69	T	C	83	13	68	T/C	0.1566	SNP
Lib10^4 1 ng	TAG_BX_ATGCGCGGAGCT	69	T	C	176	35	133	T/C	0.1989	SNP
Lib10^4 1 ng	TAG_BX_ATGCGGTGCTGC	55	A	C	121	18	94	A/C	0.1488	SNP
Lib10^4 1 ng	TAG_BX_ATGCTCTATCGT	69	T	C	135	26	102	T/C	0.1926	SNP
Lib10^4 1 ng	TAG_BX_ATGGAAATTGCC	69	T	C	111	30	78	T/C	0.2703	SNP
Lib10^4 1 ng	TAG_BX_ATGGAACTGTTG	69	T	C	164	40	120	T/C	0.2439	SNP
Lib10^4 1 ng	TAG_BX_ATGGAACTGTTG	55	A	C	163	28	123	A/C	0.1718	SNP
Lib10^4 1 ng	TAG_BX_ATGGAGGTCCGT	69	T	C	345	89	244	T/C	0.258	SNP
Lib10^4 1 ng	TAG_BX_ATGGATGAGTCT	69	T	C	136	35	94	T/C	0.2574	SNP
Lib10^4 1 ng	TAG_BX_ATGGATTTTCTT	69	T	C	73	14	56	T/C	0.1918	SNP
Lib10^4 1 ng	TAG_BX_ATGGCCGATGCC	69	T	C	118	30	84	T/C	0.2542	SNP
Lib10^4 1 ng	TAG_BX_ATGGCGATCATA	69	T	C	93	25	65	T/C	0.2688	SNP
Lib10^4 1 ng	TAG_BX_ATGGCGATCATA	55	A	C	93	14	76	A/C	0.1505	SNP
Lib10^4 1 ng	TAG_BX_ATGGCGATCATA	52	A	T	93	10	76	A/T	0.1075	SNP
Lib10^4 1 ng	TAG_BX_ATGGCTTACATG	55	A	C	91	13	74	A/C	0.1429	SNP
Lib10^4 1 ng	TAG_BX_ATGGGATCTGGT	55	A	C	165	25	124	A/C	0.1515	SNP
Lib10^4 1 ng	TAG_BX_ATGGGATTTTTA	69	T	C	155	29	125	T/C	0.1871	SNP
Lib10^4 1 ng	TAG_BX_ATGGGGTTTTGG	52	A	C	116	12	90	A/C	0.1034	SNP
Lib10^4 1 ng	TAG_BX_ATGGGTATTTTA	69	T	C	111	26	84	T/C	0.2342	SNP
Lib10^4 1 ng	TAG_BX_ATGGGTGTTATA	55	A	C	144	19	113	A/C	0.1319	SNP
Lib10^4 1 ng	TAG_BX_ATGGGTTGAATA	69	T	C	58	11	45	T/C	0.1897	SNP
Lib10^4 1 ng	TAG_BX_ATGGTAACGTTA	55	A	C	75	9	63	A/C	0.12	SNP
Lib10^4 1 ng	TAG_BX_ATGGTATGGCAC	55	A	C	125	23	93	A/C	0.184	SNP
Lib10^4 1 ng	TAG_BX_ATGGTCAAAGGT	69	T	C	198	34	154	T/C	0.1717	SNP
Lib10^4 1 ng	TAG_BX_ATGGTCAAAGGT	55	A	C	198	29	157	A/C	0.1465	SNP
Lib10^4 1 ng	TAG_BX_ATGGTGAGCGGG	55	A	C	292	39	242	A/C	0.1336	SNP
Lib10^4 1 ng	TAG_BX_ATGGTTCGATAA	55	A	C	111	19	86	A/C	0.1712	SNP
Lib10^4 1 ng	TAG_BX_ATGGTTCTTGGG	55	A	C	151	20	123	A/C	0.1325	SNP
Lib10^4 1 ng	TAG_BX_ATGGTTTCGTAC	69	T	C	140	25	109	T/C	0.1786	SNP
Lib10^4 1 ng	TAG_BX_ATGGTTTGGGTC	69	T	C	113	26	79	T/C	0.2301	SNP
Lib10^4 1 ng	TAG_BX_ATGGTTTTGAAT	55	A	C	120	21	92	A/C	0.175	SNP
Lib10^4 1 ng	TAG_BX_ATGTACCCTCGG	63	T	G	65	9	52	T/G	0.1385	SNP
Lib10^4 1 ng	TAG_BX_ATGTACCCTCGG	40	G	C	65	8	56	G/C	0.1231	SNP
Lib10^4 1 ng	TAG_BX_ATGTCACATTTT	49	A	G	44	5	36	A/G	0.1136	SNP
Lib10^4 1 ng	TAG_BX_ATGTCCGGTTGA	69	T	C	76	9	62	T/C	0.1184	SNP
Lib10^4 1 ng	TAG_BX_ATGTCGACGTGG	69	T	C	121	15	99	T/C	0.124	SNP
Lib10^4 1 ng	TAG_BX_ATGTCGTGTCTC	55	A	C	132	31	95	A/C	0.2348	SNP
Lib10^4 1 ng	TAG_BX_ATGTCGTGTCTC	69	T	C	132	26	97	T/C	0.197	SNP
Lib10^4 1 ng	TAG_BX_ATGTCGTTCGTT	55	A	C	64	10	49	A/C	0.1562	SNP
Lib10^4 1 ng	TAG_BX_ATGTCGTTTTAT	55	A	C	116	17	92	A/C	0.1466	SNP
Lib10^4 1 ng	TAG_BX_ATGTCTTCGTCG	69	T	C	149	29	115	T/C	0.1946	SNP
Lib10^4 1 ng	TAG_BX_ATGTCTTCGTCG	55	A	C	149	29	114	A/C	0.1946	SNP
Lib10^4 1 ng	TAG_BX_ATGTGAAACATG	69	T	C	186	39	140	T/C	0.2097	SNP
Lib10^4 1 ng	TAG_BX_ATGTGATCTCGG	55	A	C	163	27	125	A/C	0.1656	SNP
Lib10^4 1 ng	TAG_BX_ATGTGCAGATCA	69	T	C	179	36	137	T/C	0.2011	SNP
Lib10^4 1 ng	TAG_BX_ATGTGCCAGCTT	52	A	T	129	13	110	A/T	0.1008	SNP
Lib10^4 1 ng	TAG_BX_ATGTGGCGTGTG	69	T	C	270	54	202	T/C	0.2	SNP
Lib10^4 1 ng	TAG_BX_ATGTTACACGGG	63	T	G	136	15	115	T/G	0.1103	SNP
Lib10^4 1 ng	TAG_BX_ATGTTAGTGGTT	69	T	C	130	25	100	T/C	0.1923	SNP
Lib10^4 1 ng	TAG_BX_ATGTTCTTGTGA	55	A	C	128	13	106	A/C	0.1016	SNP
Lib10^4 1 ng	TAG_BX_ATGTTTGAGGTG	69	T	C	100	25	75	T/C	0.25	SNP
Lib10^4 1 ng	TAG_BX_ATGTTTTCGCGA	69	T	C	42	11	29	T/C	0.2619	SNP
Lib10^4 1 ng	TAG_BX_ATGTTTTGGTGC	69	T	C	180	38	140	T/C	0.2111	SNP
Lib10^4 1 ng	TAG_BX_ATTAAATCATTA	55	A	C	114	18	87	A/C	0.1579	SNP
Lib10^4 1 ng	TAG_BX_ATTAAGATGACT	69	T	C	163	38	122	T/C	0.2331	SNP
Lib10^4 1 ng	TAG_BX_ATTAAGGGCGTC	55	A	C	116	16	93	A/C	0.1379	SNP
Lib10^4 1 ng	TAG_BX_ATTAATATTAAC	69	T	C	82	18	59	T/C	0.2195	SNP
Lib10^4 1 ng	TAG_BX_ATTAATTCTTGA	69	T	C	96	14	80	T/C	0.1458	SNP
Lib10^4 1 ng	TAG_BX_ATTAATTCTTGA	55	A	C	96	14	77	A/C	0.1458	SNP
Lib10^4 1 ng	TAG_BX_ATTACCGACAAA	69	T	C	151	35	113	T/C	0.2318	SNP
Lib10^4 1 ng	TAG_BX_ATTACGGCGCTG	55	A	C	123	19	96	A/C	0.1545	SNP
Lib10^4 1 ng	TAG_BX_ATTACGGTACAG	55	A	C	87	16	66	A/C	0.1839	SNP
Lib10^4 1 ng	TAG_BX_ATTACGGTTCAA	69	T	C	180	43	133	T/C	0.2389	SNP
Lib10^4 1 ng	TAG_BX_ATTACGGTTGGC	69	T	C	135	29	102	T/C	0.2148	SNP
Lib10^4 1 ng	TAG_BX_ATTACGGTTGGC	55	A	C	135	18	108	A/C	0.1333	SNP
Lib10^4 1 ng	TAG_BX_ATTACGTCGCCG	69	T	C	157	23	127	T/C	0.1465	SNP
Lib10^4 1 ng	TAG_BX_ATTACTAGTGTA	69	T	C	169	35	125	T/C	0.2071	SNP
Lib10^4 1 ng	TAG_BX_ATTACTAGTGTA	55	A	C	169	21	139	A/C	0.1243	SNP
Lib10^4 1 ng	TAG_BX_ATTACTGCTTGA	55	A	C	262	39	201	A/C	0.1489	SNP
Lib10^4 1 ng	TAG_BX_ATTAGAATCTAT	35	A	G	81	10	67	A/G	0.1235	SNP
Lib10^4 1 ng	TAG_BX_ATTAGAATCTAT	69	T	C	81	13	66	T/C	0.1605	SNP
Lib10^4 1 ng	TAG_BX_ATTAGATATTGT	55	A	C	120	20	91	A/C	0.1667	SNP
Lib10^4 1 ng	TAG_BX_ATTAGATATTGT	69	T	C	120	24	89	T/C	0.2	SNP
Lib10^4 1 ng	TAG_BX_ATTAGGGATAAG	69	T	C	124	30	92	T/C	0.2419	SNP
Lib10^4 1 ng	TAG_BX_ATTAGGTAATTT	55	A	C	168	25	136	A/C	0.1488	SNP
Lib10^4 1 ng	TAG_BX_ATTAGGTCCCTG	55	A	C	175	22	138	A/C	0.1257	SNP
Lib10^4 1 ng	TAG_BX_ATTAGTAACCTG	55	A	C	64	9	53	A/C	0.1406	SNP
Lib10^4 1 ng	TAG_BX_ATTAGTACGTGT	55	A	C	151	20	123	A/C	0.1325	SNP
Lib10^4 1 ng	TAG_BX_ATTAGTACGTGT	69	T	C	151	39	106	T/C	0.2583	SNP
Lib10^4 1 ng	TAG_BX_ATTAGTATGTGC	55	A	C	119	18	91	A/C	0.1513	SNP
Lib10^4 1 ng	TAG_BX_ATTAGTATGTGC	69	T	C	119	27	88	T/C	0.2269	SNP
Lib10^4 1 ng	TAG_BX_ATTATAACGGAG	69	T	C	102	20	76	T/C	0.1961	SNP
Lib10^4 1 ng	TAG_BX_ATTATAATGGCG	69	T	C	96	19	75	T/C	0.1979	SNP
Lib10^4 1 ng	TAG_BX_ATTATACCAGTT	69	T	C	61	12	44	T/C	0.1967	SNP
Lib10^4 1 ng	TAG_BX_ATTATCTGTGTT	55	A	C	142	19	114	A/C	0.1338	SNP
Lib10^4 1 ng	TAG_BX_ATTATGATTTAC	55	A	C	117	18	94	A/C	0.1538	SNP
Lib10^4 1 ng	TAG_BX_ATTATTCGATCG	69	T	C	137	36	99	T/C	0.2628	SNP
Lib10^4 1 ng	TAG_BX_ATTATTGCTCAG	55	A	C	159	23	127	A/C	0.1447	SNP
Lib10^4 1 ng	TAG_BX_ATTATTTGGGGA	69	T	C	95	20	72	T/C	0.2105	SNP
Lib10^4 1 ng	TAG_BX_ATTCACGGTTTC	69	T	C	113	24	85	T/C	0.2124	SNP
Lib10^4 1 ng	TAG_BX_ATTCCCGTCCTA	55	A	C	99	18	77	A/C	0.1818	SNP
Lib10^4 1 ng	TAG_BX_ATTCCGGAACTC	69	T	C	87	15	70	T/C	0.1724	SNP
Lib10^4 1 ng	TAG_BX_ATTCCTATTTTC	55	A	C	132	16	111	A/C	0.1212	SNP
Lib10^4 1 ng	TAG_BX_ATTCCTGGTGCC	69	T	C	153	35	108	T/C	0.2288	SNP
Lib10^4 1 ng	TAG_BX_ATTCGAATTTAT	55	A	C	153	30	116	A/C	0.1961	SNP
Lib10^4 1 ng	TAG_BX_ATTCGACAACGA	69	T	C	148	40	98	T/C	0.2703	SNP
Lib10^4 1 ng	TAG_BX_ATTCGTCAGGTG	69	T	C	162	25	131	T/C	0.1543	SNP
Lib10^4 1 ng	TAG_BX_ATTCGTGGTGAC	69	T	C	46	8	38	T/C	0.1739	SNP
Lib10^4 1 ng	TAG_BX_ATTCGTGGTGAC	50	G	C	46	5	40	G/C	0.1087	SNP
Lib10^4 1 ng	TAG_BX_ATTCGTTTGAAA	55	A	C	201	24	166	A/C	0.1194	SNP
Lib10^4 1 ng	TAG_BX_ATTCGTTTGAAA	69	T	C	201	36	155	T/C	0.1791	SNP
Lib10^4 1 ng	TAG_BX_ATTCTGCAACTA	55	A	C	114	14	95	A/C	0.1228	SNP
Lib10^4 1 ng	TAG_BX_ATTCTGGGTCTG	55	A	C	141	23	115	A/C	0.1631	SNP
Lib10^4 1 ng	TAG_BX_ATTCTGTCCACC	69	T	C	87	19	66	T/C	0.2184	SNP
Lib10^4 1 ng	TAG_BX_ATTCTTCCTATG	69	T	C	181	35	138	T/C	0.1934	SNP
Lib10^4 1 ng	TAG_BX_ATTGAACATGTG	55	A	C	68	11	53	A/C	0.1618	SNP
Lib10^4 1 ng	TAG_BX_ATTGACGGAGCG	69	T	C	121	17	97	T/C	0.1405	SNP
Lib10^4 1 ng	TAG_BX_ATTGACGTCCGT	55	A	C	131	16	102	A/C	0.1221	SNP
Lib10^4 1 ng	TAG_BX_ATTGAGGTAGCG	69	T	C	156	30	117	T/C	0.1923	SNP
Lib10^4 1 ng	TAG_BX_ATTGATGCTTAT	60	T	G	107	11	94	T/G	0.1028	SNP
Lib10^4 1 ng	TAG_BX_ATTGATTAGTAT	69	T	C	128	31	94	T/C	0.2422	SNP
Lib10^4 1 ng	TAG_BX_ATTGATTCCTAC	69	T	C	126	35	87	T/C	0.2778	SNP
Lib10^4 1 ng	TAG_BX_ATTGCAAGAAGA	55	A	C	176	23	139	A/C	0.1307	SNP
Lib10^4 1 ng	TAG_BX_ATTGCTCGCCTT	55	A	C	153	24	116	A/C	0.1569	SNP
Lib10^4 1 ng	TAG_BX_ATTGGATCATTA	69	T	C	110	23	85	T/C	0.2091	SNP
Lib10^4 1 ng	TAG_BX_ATTGGGATTTTG	55	A	C	92	18	66	A/C	0.1957	SNP
Lib10^4 1 ng	TAG_BX_ATTGGGGCATTT	69	T	C	107	23	80	T/C	0.215	SNP
Lib10^4 1 ng	TAG_BX_ATTGGGTCCATG	55	A	C	53	9	40	A/C	0.1698	SNP
Lib10^4 1 ng	TAG_BX_ATTGGTAACCCA	69	T	C	77	18	55	T/C	0.2338	SNP
Lib10^4 1 ng	TAG_BX_ATTGGTCCAAGT	55	A	C	163	26	129	A/C	0.1595	SNP
Lib10^4 1 ng	TAG_BX_ATTGGTGCTCTT	55	A	C	156	24	122	A/C	0.1538	SNP
Lib10^4 1 ng	TAG_BX_ATTGGTTCGATT	69	T	C	110	20	86	T/C	0.1818	SNP
Lib10^4 1 ng	TAG_BX_ATTGGTTGTAAT	69	T	C	150	30	113	T/C	0.2	SNP
Lib10^4 1 ng	TAG_BX_ATTGGTTTATGT	69	T	C	122	24	96	T/C	0.1967	SNP
Lib10^4 1 ng	TAG_BX_ATTGGTTTTTAA	69	T	C	64	10	52	T/C	0.1562	SNP
Lib10^4 1 ng	TAG_BX_ATTGTAAGTCGA	55	A	C	119	26	87	A/C	0.2185	SNP
Lib10^4 1 ng	TAG_BX_ATTGTAATGGGT	55	A	C	44	8	34	A/C	0.1818	SNP
Lib10^4 1 ng	TAG_BX_ATTGTAATGGGT	69	T	C	44	8	33	T/C	0.1818	SNP
Lib10^4 1 ng	TAG_BX_ATTGTCGGTACT	69	T	C	79	17	54	T/C	0.2152	SNP
Lib10^4 1 ng	TAG_BX_ATTGTGCTTTGC	55	A	C	103	12	87	A/C	0.1165	SNP
Lib10^4 1 ng	TAG_BX_ATTGTGTTTTTC	55	A	C	131	20	100	A/C	0.1527	SNP
Lib10^4 1 ng	TAG_BX_ATTGTTCAGCCC	69	T	C	87	9	71	T/C	0.1034	SNP
Lib10^4 1 ng	TAG_BX_ATTGTTCCACTA	55	A	C	145	26	112	A/C	0.1793	SNP
Lib10^4 1 ng	TAG_BX_ATTGTTGAGGCC	55	A	C	158	23	127	A/C	0.1456	SNP
Lib10^4 1 ng	TAG_BX_ATTGTTTCTGAA	69	T	C	67	11	55	T/C	0.1642	SNP
Lib10^4 1 ng	TAG_BX_ATTTAATATTAG	63	T	G	91	10	78	T/G	0.1099	SNP
Lib10^4 1 ng	TAG_BX_ATTTACACCGAA	69	T	C	105	22	78	T/C	0.2095	SNP
Lib10^4 1 ng	TAG_BX_ATTTACACCGAA	55	A	C	105	11	89	A/C	0.1048	SNP
Lib10^4 1 ng	TAG_BX_ATTTACTAGGGG	69	T	C	147	33	102	T/C	0.2245	SNP
Lib10^4 1 ng	TAG_BX_ATTTAGAGGGTA	69	T	C	208	50	150	T/C	0.2404	SNP
Lib10^4 1 ng	TAG_BX_ATTTAGAGGGTA	55	A	C	208	21	176	A/C	0.101	SNP
Lib10^4 1 ng	TAG_BX_ATTTAGCAGAGG	69	T	C	146	25	115	T/C	0.1712	SNP
Lib10^4 1 ng	TAG_BX_ATTTATCTCCAA	55	A	C	143	22	113	A/C	0.1538	SNP
Lib10^4 1 ng	TAG_BX_ATTTATTGAACG	69	T	C	97	18	76	T/C	0.1856	SNP
Lib10^4 1 ng	TAG_BX_ATTTATTGTCTG	69	T	C	60	14	40	T/C	0.2333	SNP
Lib10^4 1 ng	TAG_BX_ATTTATTGTCTG	55	A	C	60	10	47	A/C	0.1667	SNP
Lib10^4 1 ng	TAG_BX_ATTTCAAACAAG	55	A	C	126	18	98	A/C	0.1429	SNP
Lib10^4 1 ng	TAG_BX_ATTTCGCAATCT	69	T	C	143	39	98	T/C	0.2727	SNP
Lib10^4 1 ng	TAG_BX_ATTTCGCAATCT	55	A	C	143	16	115	A/C	0.1119	SNP
Lib10^4 1 ng	TAG_BX_ATTTCGTCGTGG	69	T	C	85	21	61	T/C	0.2471	SNP
Lib10^4 1 ng	TAG_BX_ATTTCTCTGGCC	69	T	C	191	41	144	T/C	0.2147	SNP
Lib10^4 1 ng	TAG_BX_ATTTCTGTCCGC	35	A	G	83	12	65	A/G	0.1446	SNP
Lib10^4 1 ng	TAG_BX_ATTTCTTTTTCT	69	T	C	104	22	81	T/C	0.2115	SNP
Lib10^4 1 ng	TAG_BX_ATTTGCTGCATA	55	A	C	131	20	101	A/C	0.1527	SNP
Lib10^4 1 ng	TAG_BX_ATTTGCTTAGGA	69	T	C	166	38	118	T/C	0.2289	SNP
Lib10^4 1 ng	TAG_BX_ATTTGCTTTCCC	69	T	C	141	35	101	T/C	0.2482	SNP
Lib10^4 1 ng	TAG_BX_ATTTGGACTAGT	69	T	C	49	10	37	T/C	0.2041	SNP
Lib10^4 1 ng	TAG_BX_ATTTGGACTAGT	55	A	C	49	11	38	A/C	0.2245	SNP
Lib10^4 1 ng	TAG_BX_ATTTGGAGTTTC	55	A	C	149	21	118	A/C	0.1409	SNP
Lib10^4 1 ng	TAG_BX_ATTTGGGAACCA	55	A	C	134	15	110	A/C	0.1119	SNP
Lib10^4 1 ng	TAG_BX_ATTTGTATTCCT	69	T	C	103	26	73	T/C	0.2524	SNP
Lib10^4 1 ng	TAG_BX_ATTTGTCCGAAA	69	T	C	115	19	90	T/C	0.1652	SNP
Lib10^4 1 ng	TAG_BX_ATTTGTGGGGGA	69	T	C	72	15	54	T/C	0.2083	SNP
Lib10^4 1 ng	TAG_BX_ATTTGTGTCTAC	69	T	C	145	30	110	T/C	0.2069	SNP
Lib10^4 1 ng	TAG_BX_ATTTGTTGTATA	55	A	C	108	16	85	A/C	0.1481	SNP
Lib10^4 1 ng	TAG_BX_ATTTTAGCACTG	55	A	C	146	22	111	A/C	0.1507	SNP
Lib10^4 1 ng	TAG_BX_ATTTTATGGGAT	55	A	C	140	21	109	A/C	0.15	SNP
Lib10^4 1 ng	TAG_BX_ATTTTATTTCGT	69	T	C	81	22	55	T/C	0.2716	SNP
Lib10^4 1 ng	TAG_BX_ATTTTCGCTTAC	52	A	C	98	10	82	A/C	0.102	SNP
Lib10^4 1 ng	TAG_BX_ATTTTCTTAGAT	69	T	C	50	11	37	T/C	0.22	SNP
Lib10^4 1 ng	TAG_BX_ATTTTCTTAGAT	55	A	C	50	11	33	A/C	0.22	SNP
Lib10^4 1 ng	TAG_BX_ATTTTGCACACG	55	A	C	90	15	70	A/C	0.1667	SNP
Lib10^4 1 ng	TAG_BX_ATTTTGCGCTCT	69	T	C	179	51	123	T/C	0.2849	SNP
Lib10^4 1 ng	TAG_BX_ATTTTGGCTCTA	69	T	C	141	30	105	T/C	0.2128	SNP
Lib10^4 1 ng	TAG_BX_ATTTTGTCTCTG	69	T	C	115	24	88	T/C	0.2087	SNP
Lib10^4 1 ng	TAG_BX_ATTTTTACGTCG	55	A	C	97	12	80	A/C	0.1237	SNP
Lib10^4 1 ng	TAG_BX_ATTTTTATGGTC	55	A	C	131	23	100	A/C	0.1756	SNP
Lib10^4 1 ng	TAG_BX_ATTTTTATTTCA	55	A	C	263	48	195	A/C	0.1825	SNP
Lib10^4 1 ng	TAG_BX_ATTTTTCGTGTG	55	A	C	189	27	152	A/C	0.1429	SNP
Lib10^4 1 ng	TAG_BX_ATTTTTCGTTAC	69	T	C	101	20	75	T/C	0.198	SNP
Lib10^4 1 ng	TAG_BX_ATTTTTCTCCCC	69	T	C	196	31	157	T/C	0.1582	SNP
Lib10^4 1 ng	TAG_BX_CAAAAGGCTTTT	69	T	C	134	36	92	T/C	0.2687	SNP
Lib10^4 1 ng	TAG_BX_CAAAAGGCTTTT	55	A	C	134	15	104	A/C	0.1119	SNP
Lib10^4 1 ng	TAG_BX_CAAAAGTGTGCC	69	T	C	80	24	54	T/C	0.3	SNP
Lib10^4 1 ng	TAG_BX_CAAAATGACCAG	69	T	C	188	46	133	T/C	0.2447	SNP
Lib10^4 1 ng	TAG_BX_CAAACCTCTCGT	69	T	C	84	18	63	T/C	0.2143	SNP
Lib10^4 1 ng	TAG_BX_CAAACTCATCTA	60	T	G	151	16	132	T/G	0.106	SNP
Lib10^4 1 ng	TAG_BX_CAAAGCACATTG	55	A	C	96	10	80	A/C	0.1042	SNP
Lib10^4 1 ng	TAG_BX_CAAAGGCGTCAG	69	T	C	129	23	103	T/C	0.1783	SNP
Lib10^4 1 ng	TAG_BX_CAAAGTTGAAAT	69	T	C	196	36	152	T/C	0.1837	SNP
Lib10^4 1 ng	TAG_BX_CAAATCAGTAAG	69	T	C	145	37	102	T/C	0.2552	SNP
Lib10^4 1 ng	TAG_BX_CAAATCAGTAAG	55	A	C	145	20	115	A/C	0.1379	SNP
Lib10^4 1 ng	TAG_BX_CAAATTGGGACT	55	A	C	171	22	136	A/C	0.1287	SNP
Lib10^4 1 ng	TAG_BX_CAACAGGTCCAA	69	T	C	115	19	94	T/C	0.1652	SNP
Lib10^4 1 ng	TAG_BX_CAACATCGTTGT	69	T	C	159	33	120	T/C	0.2075	SNP
Lib10^4 1 ng	TAG_BX_CAACATGAATTG	69	T	C	83	26	51	T/C	0.3133	SNP
Lib10^4 1 ng	TAG_BX_CAACCAGAGCTT	69	T	C	146	31	108	T/C	0.2123	SNP
Lib10^4 1 ng	TAG_BX_CAACCCTAAGAA	55	A	C	156	24	118	A/C	0.1538	SNP
Lib10^4 1 ng	TAG_BX_CAACCTATCTTT	69	T	C	77	18	56	T/C	0.2338	SNP
Lib10^4 1 ng	TAG_BX_CAACGTACTGGG	55	A	C	55	10	42	A/C	0.1818	SNP
Lib10^4 1 ng	TAG_BX_CAACTTTTGGTA	69	T	C	126	26	97	T/C	0.2063	SNP
Lib10^4 1 ng	TAG_BX_CAAGAACTGGGG	69	T	C	120	24	92	T/C	0.2	SNP
Lib10^4 1 ng	TAG_BX_CAAGAATGTTGT	69	T	C	91	18	68	T/C	0.1978	SNP
Lib10^4 1 ng	TAG_BX_CAAGAGCGTAGG	55	A	C	83	14	65	A/C	0.1687	SNP
Lib10^4 1 ng	TAG_BX_CAAGATAGGTAC	69	T	C	52	9	42	T/C	0.1731	SNP
Lib10^4 1 ng	TAG_BX_CAAGATAGGTAC	52	A	T	52	6	41	A/T	0.1154	SNP
Lib10^4 1 ng	TAG_BX_CAAGATATATCG	69	T	C	126	25	100	T/C	0.1984	SNP
Lib10^4 1 ng	TAG_BX_CAAGCATTACGC	69	T	C	175	28	137	T/C	0.16	SNP
Lib10^4 1 ng	TAG_BX_CAAGGGGGGGGC	55	A	C	109	17	83	A/C	0.156	SNP
Lib10^4 1 ng	TAG_BX_CAAGGGTTCCTC	69	T	C	171	40	124	T/C	0.2339	SNP
Lib10^4 1 ng	TAG_BX_CAAGGGTTTAAT	55	A	C	142	20	111	A/C	0.1408	SNP
Lib10^4 1 ng	TAG_BX_CAAGGTCTCTAG	69	T	C	67	14	52	T/C	0.209	SNP
Lib10^4 1 ng	TAG_BX_CAAGGTCTCTAG	58	T	G	67	7	59	T/G	0.1045	SNP
Lib10^4 1 ng	TAG_BX_CAAGTATACGAG	69	T	C	87	18	65	T/C	0.2069	SNP
Lib10^4 1 ng	TAG_BX_CAAGTCAACAGT	69	T	C	149	25	120	T/C	0.1678	SNP
Lib10^4 1 ng	TAG_BX_CAAGTGGTAAGA	55	A	C	106	20	78	A/C	0.1887	SNP
Lib10^4 1 ng	TAG_BX_CAAGTGGTAAGA	69	T	C	106	26	77	T/C	0.2453	SNP
Lib10^4 1 ng	TAG_BX_CAAGTTGATGGG	69	T	C	127	33	92	T/C	0.2598	SNP
Lib10^4 1 ng	TAG_BX_CAAGTTTCTACG	55	A	C	109	17	86	A/C	0.156	SNP
Lib10^4 1 ng	TAG_BX_CAATACCCGGGA	69	T	C	103	25	74	T/C	0.2427	SNP
Lib10^4 1 ng	TAG_BX_CAATCCCCTGTA	69	T	C	63	12	49	T/C	0.1905	SNP
Lib10^4 1 ng	TAG_BX_CAATCCCCTGTA	55	A	C	63	11	49	A/C	0.1746	SNP
Lib10^4 1 ng	TAG_BX_CAATCCGGGGTG	69	T	C	77	14	61	T/C	0.1818	SNP
Lib10^4 1 ng	TAG_BX_CAATCGTTAGCA	69	T	C	201	41	149	T/C	0.204	SNP
Lib10^4 1 ng	TAG_BX_CAATCTGCTATG	69	T	C	157	37	116	T/C	0.2357	SNP
Lib10^4 1 ng	TAG_BX_CAATGAATTGCT	55	A	C	153	27	119	A/C	0.1765	SNP
Lib10^4 1 ng	TAG_BX_CAATGATCCAGA	69	T	C	58	6	48	T/C	0.1034	SNP
Lib10^4 1 ng	TAG_BX_CAATGCTACTTT	69	T	C	128	28	97	T/C	0.2188	SNP
Lib10^4 1 ng	TAG_BX_CAATGGACCTAG	55	A	C	64	13	48	A/C	0.2031	SNP
Lib10^4 1 ng	TAG_BX_CAATGGACCTAG	69	T	C	65	16	47	T/C	0.2462	SNP
Lib10^4 1 ng	TAG_BX_CAATTAGTAAGC	55	A	C	100	17	81	A/C	0.17	SNP
Lib10^4 1 ng	TAG_BX_CAATTAGTCCAA	55	A	C	173	22	137	A/C	0.1272	SNP
Lib10^4 1 ng	TAG_BX_CACAACCCTGGG	55	A	C	196	33	152	A/C	0.1684	SNP
Lib10^4 1 ng	TAG_BX_CACAACTAAATG	55	A	C	100	15	81	A/C	0.15	SNP
Lib10^4 1 ng	TAG_BX_CACAGGTGGGAG	55	A	C	103	21	80	A/C	0.2039	SNP
Lib10^4 1 ng	TAG_BX_CACAGGTGGGAG	69	T	C	103	33	68	T/C	0.3204	SNP
Lib10^4 1 ng	TAG_BX_CACATGGTTTCT	55	A	C	118	16	97	A/C	0.1356	SNP
Lib10^4 1 ng	TAG_BX_CACATTTGCCCC	69	T	C	51	19	31	T/C	0.3725	SNP
Lib10^4 1 ng	TAG_BX_CACCCCTATTTC	69	T	C	68	18	49	T/C	0.2647	SNP
Lib10^4 1 ng	TAG_BX_CACCCGCAGTTC	55	A	C	122	14	99	A/C	0.1148	SNP
Lib10^4 1 ng	TAG_BX_CACCCTGGGGTT	69	T	C	78	15	63	T/C	0.1923	SNP
Lib10^4 1 ng	TAG_BX_CACCCTTGGGCT	55	A	C	85	14	67	A/C	0.1647	SNP
Lib10^4 1 ng	TAG_BX_CACCGTACCGCG	55	A	C	165	22	135	A/C	0.1333	SNP
Lib10^4 1 ng	TAG_BX_CACCGTGAATTT	55	A	C	111	18	89	A/C	0.1622	SNP
Lib10^4 1 ng	TAG_BX_CACCTCATATAA	69	T	C	49	12	33	T/C	0.2449	SNP
Lib10^4 1 ng	TAG_BX_CACCTGCCGGTT	69	T	C	48	9	35	T/C	0.1875	SNP
Lib10^4 1 ng	TAG_BX_CACCTGCCGGTT	55	A	C	48	5	39	A/C	0.1042	SNP
Lib10^4 1 ng	TAG_BX_CACCTGTCTGTT	69	T	C	139	33	99	T/C	0.2374	SNP
Lib10^4 1 ng	TAG_BX_CACCTGTCTGTT	55	A	C	139	15	112	A/C	0.1079	SNP
Lib10^4 1 ng	TAG_BX_CACGAACTGTAG	55	A	C	186	25	149	A/C	0.1344	SNP
Lib10^4 1 ng	TAG_BX_CACGAATTCAGT	55	A	C	118	20	89	A/C	0.1695	SNP
Lib10^4 1 ng	TAG_BX_CACGATATTGCC	69	T	C	49	10	37	T/C	0.2041	SNP
Lib10^4 1 ng	TAG_BX_CACGCGGGTGGT	69	T	C	149	36	105	T/C	0.2416	SNP
Lib10^4 1 ng	TAG_BX_CACGCTTTTCGC	69	T	C	88	22	62	T/C	0.25	SNP
Lib10^4 1 ng	TAG_BX_CACGGAAGTTGT	69	T	C	103	28	72	T/C	0.2718	SNP
Lib10^4 1 ng	TAG_BX_CACGGGATCGTA	69	T	C	213	40	167	T/C	0.1878	SNP
Lib10^4 1 ng	TAG_BX_CACGTAACCAGC	69	T	C	45	9	34	T/C	0.2	SNP
Lib10^4 1 ng	TAG_BX_CACGTTTATTAA	69	T	C	118	28	86	T/C	0.2373	SNP
Lib10^4 1 ng	TAG_BX_CACTAAGTAGGC	69	T	C	53	13	39	T/C	0.2453	SNP
Lib10^4 1 ng	TAG_BX_CACTAGCGCAGT	69	T	C	192	48	138	T/C	0.25	SNP
Lib10^4 1 ng	TAG_BX_CACTCATGCTGA	69	T	C	105	23	82	T/C	0.219	SNP
Lib10^4 1 ng	TAG_BX_CACTCGGGGGGC	69	T	C	132	30	96	T/C	0.2273	SNP
Lib10^4 1 ng	TAG_BX_CACTCTCTCAGA	69	T	C	109	22	83	T/C	0.2018	SNP
Lib10^4 1 ng	TAG_BX_CACTGTGGTGCG	55	A	C	133	18	108	A/C	0.1353	SNP
Lib10^4 1 ng	TAG_BX_CACTTGATAGTT	69	T	C	154	31	116	T/C	0.2013	SNP
Lib10^4 1 ng	TAG_BX_CACTTGATGGGC	69	T	C	178	40	129	T/C	0.2247	SNP
Lib10^4 1 ng	TAG_BX_CACTTGATGGGC	55	A	C	178	23	145	A/C	0.1292	SNP
Lib10^4 1 ng	TAG_BX_CACTTGGCCTGG	69	T	C	92	12	75	T/C	0.1304	SNP
Lib10^4 1 ng	TAG_BX_CACTTTGGATAC	55	A	C	144	18	118	A/C	0.125	SNP
Lib10^4 1 ng	TAG_BX_CACTTTGGATAC	69	T	C	144	32	102	T/C	0.2222	SNP
Lib10^4 1 ng	TAG_BX_CAGAACGTGTGC	55	A	C	144	21	111	A/C	0.1458	SNP
Lib10^4 1 ng	TAG_BX_CAGACATCTGAT	69	T	C	130	19	106	T/C	0.1462	SNP
Lib10^4 1 ng	TAG_BX_CAGACATCTGAT	55	A	C	130	20	99	A/C	0.1538	SNP
Lib10^4 1 ng	TAG_BX_CAGAGCAAAGCA	69	T	C	143	29	111	T/C	0.2028	SNP
Lib10^4 1 ng	TAG_BX_CAGAGCAAAGCA	55	A	C	143	20	112	A/C	0.1399	SNP
Lib10^4 1 ng	TAG_BX_CAGAGCATCCAC	55	A	C	133	19	107	A/C	0.1429	SNP
Lib10^4 1 ng	TAG_BX_CAGAGCCGGTTC	69	T	C	138	46	91	T/C	0.3333	SNP
Lib10^4 1 ng	TAG_BX_CAGAGTGTCCTA	55	A	C	135	18	111	A/C	0.1333	SNP
Lib10^4 1 ng	TAG_BX_CAGATTTGGTCT	69	T	C	132	34	93	T/C	0.2576	SNP
Lib10^4 1 ng	TAG_BX_CAGATTTGGTCT	58	T	G	132	16	110	T/G	0.1212	SNP
Lib10^4 1 ng	TAG_BX_CAGATTTGTGCA	55	A	C	181	27	142	A/C	0.1492	SNP
Lib10^4 1 ng	TAG_BX_CAGCCGGGTATA	69	T	C	135	23	107	T/C	0.1704	SNP
Lib10^4 1 ng	TAG_BX_CAGCCGTTGATG	69	T	C	118	23	87	T/C	0.1949	SNP
Lib10^4 1 ng	TAG_BX_CAGCGACAAACG	69	T	C	228	46	177	T/C	0.2018	SNP
Lib10^4 1 ng	TAG_BX_CAGCGCCTCGTA	69	T	C	222	56	154	T/C	0.2523	SNP
Lib10^4 1 ng	TAG_BX_CAGCGTTCAGAA	55	A	C	80	9	63	A/C	0.1125	SNP
Lib10^4 1 ng	TAG_BX_CAGCGTTCAGAA	69	T	C	80	10	66	T/C	0.125	SNP
Lib10^4 1 ng	TAG_BX_CAGCTAAGTCAT	69	T	C	122	24	90	T/C	0.1967	SNP
Lib10^4 1 ng	TAG_BX_CAGCTAAGTCAT	55	A	C	122	27	87	A/C	0.2213	SNP
Lib10^4 1 ng	TAG_BX_CAGCTCCTGTGG	69	T	C	95	23	67	T/C	0.2421	SNP
Lib10^4 1 ng	TAG_BX_CAGCTGGGGTAT	58	T	G	97	13	78	T/G	0.134	SNP
Lib10^4 1 ng	TAG_BX_CAGCTGGTGTTT	69	T	C	74	11	60	T/C	0.1486	SNP
Lib10^4 1 ng	TAG_BX_CAGCTTAGGGTC	60	T	G	66	7	57	T/G	0.1061	SNP
Lib10^4 1 ng	TAG_BX_CAGCTTCTGTTC	69	T	C	77	18	57	T/C	0.2338	SNP
Lib10^4 1 ng	TAG_BX_CAGCTTTTATTT	52	A	T	126	15	106	A/T	0.119	SNP
Lib10^4 1 ng	TAG_BX_CAGGATGATACT	69	T	C	116	16	92	T/C	0.1379	SNP
Lib10^4 1 ng	TAG_BX_CAGGATTGATCC	55	A	C	160	26	119	A/C	0.1625	SNP
Lib10^4 1 ng	TAG_BX_CAGGGCATTTGG	55	A	C	146	25	108	A/C	0.1712	SNP
Lib10^4 1 ng	TAG_BX_CAGGGCATTTGG	69	T	C	146	30	107	T/C	0.2055	SNP
Lib10^4 1 ng	TAG_BX_CAGGGCTGGGGG	69	T	C	74	15	55	T/C	0.2027	SNP
Lib10^4 1 ng	TAG_BX_CAGGGGGAGCTG	69	T	C	162	39	115	T/C	0.2407	SNP
Lib10^4 1 ng	TAG_BX_CAGGGGGATTCT	55	A	C	77	11	59	A/C	0.1429	SNP
Lib10^4 1 ng	TAG_BX_CAGGGTTAACAT	55	A	C	142	18	115	A/C	0.1268	SNP
Lib10^4 1 ng	TAG_BX_CAGGGTTATTGG	69	T	C	180	39	133	T/C	0.2167	SNP
Lib10^4 1 ng	TAG_BX_CAGGGTTGGTTT	69	T	C	167	31	128	T/C	0.1856	SNP
Lib10^4 1 ng	TAG_BX_CAGGTAAGGTGT	69	T	C	59	14	39	T/C	0.2373	SNP
Lib10^4 1 ng	TAG_BX_CAGGTAAGGTGT	55	A	C	59	6	52	A/C	0.1017	SNP
Lib10^4 1 ng	TAG_BX_CAGGTATAGAGA	55	A	C	149	17	123	A/C	0.1141	SNP
Lib10^4 1 ng	TAG_BX_CAGGTATAGAGA	69	T	C	149	32	108	T/C	0.2148	SNP
Lib10^4 1 ng	TAG_BX_CAGGTCATTACT	55	A	C	63	7	51	A/C	0.1111	SNP
Lib10^4 1 ng	TAG_BX_CAGGTCTTTAGG	69	T	C	185	30	146	T/C	0.1622	SNP
Lib10^4 1 ng	TAG_BX_CAGGTGTCTCAT	69	T	C	125	24	98	T/C	0.192	SNP
Lib10^4 1 ng	TAG_BX_CAGGTTAAATTT	69	T	C	135	25	103	T/C	0.1852	SNP
Lib10^4 1 ng	TAG_BX_CAGGTTCTAGTC	55	A	C	152	19	124	A/C	0.125	SNP
Lib10^4 1 ng	TAG_BX_CAGGTTTGGGAT	55	A	C	98	15	70	A/C	0.1531	SNP
Lib10^4 1 ng	TAG_BX_CAGTACTTTGAC	69	T	C	126	29	90	T/C	0.2302	SNP
Lib10^4 1 ng	TAG_BX_CAGTAGTTTTGC	55	A	C	91	10	72	A/C	0.1099	SNP
Lib10^4 1 ng	TAG_BX_CAGTAGTTTTGC	69	T	C	91	25	62	T/C	0.2747	SNP
Lib10^4 1 ng	TAG_BX_CAGTATGATAGT	55	A	C	121	18	95	A/C	0.1488	SNP
Lib10^4 1 ng	TAG_BX_CAGTATTTACAA	55	A	C	109	18	84	A/C	0.1651	SNP
Lib10^4 1 ng	TAG_BX_CAGTCTACCATT	55	A	C	95	17	68	A/C	0.1789	SNP
Lib10^4 1 ng	TAG_BX_CAGTCTACCATT	69	T	C	95	23	71	T/C	0.2421	SNP
Lib10^4 1 ng	TAG_BX_CAGTCTCCATAC	69	T	C	82	17	63	T/C	0.2073	SNP
Lib10^4 1 ng	TAG_BX_CAGTCTCCATAC	55	A	C	82	10	66	A/C	0.122	SNP
Lib10^4 1 ng	TAG_BX_CAGTCTTGATGA	55	A	C	174	20	142	A/C	0.1149	SNP
Lib10^4 1 ng	TAG_BX_CAGTGGTGGACC	69	T	C	99	23	75	T/C	0.2323	SNP
Lib10^4 1 ng	TAG_BX_CAGTGGTGGACC	55	A	C	99	15	77	A/C	0.1515	SNP
Lib10^4 1 ng	TAG_BX_CAGTGTCTGAAT	55	A	C	183	33	140	A/C	0.1803	SNP
Lib10^4 1 ng	TAG_BX_CAGTTGAATACT	69	T	C	123	26	89	T/C	0.2114	SNP
Lib10^4 1 ng	TAG_BX_CAGTTGCTGGAC	69	T	C	299	62	223	T/C	0.2074	SNP
Lib10^4 1 ng	TAG_BX_CAGTTTTTGTGG	69	T	C	126	24	95	T/C	0.1905	SNP
Lib10^4 1 ng	TAG_BX_CATAAATCTACC	55	A	C	50	7	41	A/C	0.14	SNP
Lib10^4 1 ng	TAG_BX_CATAAATCTACC	60	T	G	50	8	39	T/G	0.16	SNP
Lib10^4 1 ng	TAG_BX_CATAATTGCAAC	69	T	C	98	20	72	T/C	0.2041	SNP
Lib10^4 1 ng	TAG_BX_CATAGTCACTAT	55	A	C	87	13	71	A/C	0.1494	SNP
Lib10^4 1 ng	TAG_BX_CATAGTGCTTTT	52	A	T	95	10	77	A/T	0.1053	SNP
Lib10^4 1 ng	TAG_BX_CATAGTGCTTTT	69	T	C	95	17	75	T/C	0.1789	SNP
Lib10^4 1 ng	TAG_BX_CATATAGACCTG	69	T	C	89	27	61	T/C	0.3034	SNP
Lib10^4 1 ng	TAG_BX_CATATATGGACC	69	T	C	121	25	91	T/C	0.2066	SNP
Lib10^4 1 ng	TAG_BX_CATATATGGACC	55	A	C	121	23	87	A/C	0.1901	SNP
Lib10^4 1 ng	TAG_BX_CATATTCCAGGT	55	A	C	113	14	93	A/C	0.1239	SNP
Lib10^4 1 ng	TAG_BX_CATATTGTTCGT	55	A	C	241	30	195	A/C	0.1245	SNP
Lib10^4 1 ng	TAG_BX_CATATTTCGTTT	69	T	C	82	17	59	T/C	0.2073	SNP
Lib10^4 1 ng	TAG_BX_CATCATAACTTG	58	T	G	97	11	84	T/G	0.1134	SNP
Lib10^4 1 ng	TAG_BX_CATCATTCAGAA	69	T	C	107	19	81	T/C	0.1776	SNP
Lib10^4 1 ng	TAG_BX_CATCCTGTATGG	55	A	C	115	23	90	A/C	0.2	SNP
Lib10^4 1 ng	TAG_BX_CATCCTGTATGG	69	T	C	115	16	94	T/C	0.1391	SNP
Lib10^4 1 ng	TAG_BX_CATCCTTAGGTA	55	A	C	131	20	103	A/C	0.1527	SNP
Lib10^4 1 ng	TAG_BX_CATCGCGGCCGT	69	T	C	111	26	81	T/C	0.2342	SNP
Lib10^4 1 ng	TAG_BX_CATCGGTGTCGT	69	T	C	154	35	117	T/C	0.2273	SNP
Lib10^4 1 ng	TAG_BX_CATCGTTCCTTA	69	T	C	201	39	152	T/C	0.194	SNP
Lib10^4 1 ng	TAG_BX_CATCTCAGGGCA	55	A	C	307	44	241	A/C	0.1433	SNP
Lib10^4 1 ng	TAG_BX_CATCTGGGTATG	69	T	C	197	35	156	T/C	0.1777	SNP
Lib10^4 1 ng	TAG_BX_CATCTGTAAAGA	-58	T	C	190	190	0	T/C	1	SNP
Lib10^4 1 ng	TAG_BX_CATCTTTACTGA	55	A	C	317	46	250	A/C	0.1451	SNP
Lib10^4 1 ng	TAG_BX_CATCTTTATTTT	69	T	C	104	30	69	T/C	0.2885	SNP
Lib10^4 1 ng	TAG_BX_CATCTTTTGGGG	55	A	C	144	22	114	A/C	0.1528	SNP
Lib10^4 1 ng	TAG_BX_CATGACCCAGTC	55	A	C	106	15	85	A/C	0.1415	SNP
Lib10^4 1 ng	TAG_BX_CATGACTCTTAT	55	A	C	104	21	78	A/C	0.2019	SNP
Lib10^4 1 ng	TAG_BX_CATGACTTCTTG	69	T	C	174	42	126	T/C	0.2414	SNP
Lib10^4 1 ng	TAG_BX_CATGAGACTGAG	69	T	C	179	43	129	T/C	0.2402	SNP
Lib10^4 1 ng	TAG_BX_CATGAGACTGAG	55	A	C	179	20	146	A/C	0.1117	SNP
Lib10^4 1 ng	TAG_BX_CATGAGCCTACC	69	T	C	173	39	127	T/C	0.2254	SNP
Lib10^4 1 ng	TAG_BX_CATGCACAATCA	69	T	C	129	28	96	T/C	0.2171	SNP
Lib10^4 1 ng	TAG_BX_CATGCATTACGG	69	T	C	64	8	55	T/C	0.125	SNP
Lib10^4 1 ng	TAG_BX_CATGCGGTAGCA	69	T	C	296	65	219	T/C	0.2196	SNP
Lib10^4 1 ng	TAG_BX_CATGCTCAGGTC	69	T	C	225	59	159	T/C	0.2622	SNP
Lib10^4 1 ng	TAG_BX_CATGCTCGATTT	69	T	C	61	9	52	T/C	0.1475	SNP
Lib10^4 1 ng	TAG_BX_CATGCTGGACTT	69	T	C	61	17	42	T/C	0.2787	SNP
Lib10^4 1 ng	TAG_BX_CATGCTGGTACG	69	T	C	282	69	198	T/C	0.2447	SNP
Lib10^4 1 ng	TAG_BX_CATGCTTCTTTA	68	T	C	116	12	100	T/C	0.1034	SNP
Lib10^4 1 ng	TAG_BX_CATGGATCGGGT	69	T	C	159	38	114	T/C	0.239	SNP
Lib10^4 1 ng	TAG_BX_CATGGATGATCC	69	T	C	113	25	83	T/C	0.2212	SNP
Lib10^4 1 ng	TAG_BX_CATGGGTTACGT	55	A	C	96	19	70	A/C	0.1979	SNP
Lib10^4 1 ng	TAG_BX_CATGGTCAATCT	69	T	C	94	22	69	T/C	0.234	SNP
Lib10^4 1 ng	TAG_BX_CATGGTCAATCT	49	A	C	94	10	80	A/C	0.1064	SNP
Lib10^4 1 ng	TAG_BX_CATGGTCAATCT	55	A	C	94	16	69	A/C	0.1702	SNP
Lib10^4 1 ng	TAG_BX_CATGGTGTGTAG	69	T	C	74	15	54	T/C	0.2027	SNP
Lib10^4 1 ng	TAG_BX_CATGTAATGCAG	69	T	C	119	31	85	T/C	0.2605	SNP
Lib10^4 1 ng	TAG_BX_CATGTATGTTGT	55	A	C	116	20	89	A/C	0.1724	SNP
Lib10^4 1 ng	TAG_BX_CATGTCAATCAC	55	A	C	108	21	82	A/C	0.1944	SNP
Lib10^4 1 ng	TAG_BX_CATGTTATGATT	55	A	C	91	12	70	A/C	0.1319	SNP
Lib10^4 1 ng	TAG_BX_CATGTTCCTGGG	55	A	C	90	16	67	A/C	0.1778	SNP
Lib10^4 1 ng	TAG_BX_CATGTTCCTGGG	69	T	C	90	25	63	T/C	0.2778	SNP
Lib10^4 1 ng	TAG_BX_CATGTTTCCCTG	55	A	C	45	8	37	A/C	0.1778	SNP
Lib10^4 1 ng	TAG_BX_CATGTTTTGTTT	69	T	C	101	14	83	T/C	0.1386	SNP
Lib10^4 1 ng	TAG_BX_CATGTTTTGTTT	55	A	C	101	15	82	A/C	0.1485	SNP
Lib10^4 1 ng	TAG_BX_CATTAATTTCGA	69	T	C	156	33	116	T/C	0.2115	SNP
Lib10^4 1 ng	TAG_BX_CATTACTTTGCT	69	T	C	172	35	124	T/C	0.2035	SNP
Lib10^4 1 ng	TAG_BX_CATTAGAATAAC	55	A	C	43	5	35	A/C	0.1163	SNP
Lib10^4 1 ng	TAG_BX_CATTAGTTATTC	55	A	C	45	9	33	A/C	0.2	SNP
Lib10^4 1 ng	TAG_BX_CATTATGCCGGG	69	T	C	152	35	108	T/C	0.2303	SNP
Lib10^4 1 ng	TAG_BX_CATTCACCATAG	69	T	C	124	30	88	T/C	0.2419	SNP
Lib10^4 1 ng	TAG_BX_CATTCCATTGCT	55	A	C	101	13	85	A/C	0.1287	SNP
Lib10^4 1 ng	TAG_BX_CATTCGGGGTAT	69	T	C	106	20	80	T/C	0.1887	SNP
Lib10^4 1 ng	TAG_BX_CATTCTCGCTCT	69	T	C	98	28	69	T/C	0.2857	SNP
Lib10^4 1 ng	TAG_BX_CATTCTGGGGCT	69	T	C	187	46	135	T/C	0.246	SNP
Lib10^4 1 ng	TAG_BX_CATTGGCTACGT	35	A	G	53	6	46	A/G	0.1132	SNP
Lib10^4 1 ng	TAG_BX_CATTGTCGGTTC	55	A	C	151	23	119	A/C	0.1523	SNP
Lib10^4 1 ng	TAG_BX_CATTGTCGGTTC	69	T	C	151	31	115	T/C	0.2053	SNP
Lib10^4 1 ng	TAG_BX_CATTGTCTGCTA	55	A	C	191	24	158	A/C	0.1257	SNP
Lib10^4 1 ng	TAG_BX_CATTGTTAGACT	69	T	C	97	20	76	T/C	0.2062	SNP
Lib10^4 1 ng	TAG_BX_CATTGTTCGTTG	69	T	C	93	29	60	T/C	0.3118	SNP
Lib10^4 1 ng	TAG_BX_CATTGTTGAATT	55	A	C	59	10	46	A/C	0.1695	SNP
Lib10^4 1 ng	TAG_BX_CATTGTTTTACT	69	T	C	144	25	111	T/C	0.1736	SNP
Lib10^4 1 ng	TAG_BX_CATTTACATGCA	55	A	C	107	11	89	A/C	0.1028	SNP
Lib10^4 1 ng	TAG_BX_CATTTATGCTCC	55	A	C	128	24	98	A/C	0.1875	SNP
Lib10^4 1 ng	TAG_BX_CATTTGGAGGGG	55	A	C	207	29	165	A/C	0.1401	SNP
Lib10^4 1 ng	TAG_BX_CATTTGGAGGGG	69	T	C	207	42	157	T/C	0.2029	SNP
Lib10^4 1 ng	TAG_BX_CATTTTAGTGTT	69	T	C	126	31	90	T/C	0.246	SNP
Lib10^4 1 ng	TAG_BX_CATTTTAGTGTT	55	A	C	126	24	100	A/C	0.1905	SNP
Lib10^4 1 ng	TAG_BX_CATTTTGGACAG	69	T	C	132	21	99	T/C	0.1591	SNP
Lib10^4 1 ng	TAG_BX_CATTTTGGACAG	55	A	C	132	16	107	A/C	0.1212	SNP
Lib10^4 1 ng	TAG_BX_CATTTTGGCGCT	69	T	C	127	27	93	T/C	0.2126	SNP
Lib10^4 1 ng	TAG_BX_CATTTTTCTTTG	55	A	C	101	21	73	A/C	0.2079	SNP
Lib10^4 1 ng	TAG_BX_CATTTTTCTTTG	69	T	C	101	13	78	T/C	0.1287	SNP
Lib10^4 1 ng	TAG_BX_CCAAATGATATG	69	T	C	169	39	126	T/C	0.2308	SNP
Lib10^4 1 ng	TAG_BX_CCAAGTTTTGTT	55	A	C	151	27	116	A/C	0.1788	SNP
Lib10^4 1 ng	TAG_BX_CCAATTTAGCAA	69	T	C	77	25	49	T/C	0.3247	SNP
Lib10^4 1 ng	TAG_BX_CCACACTTAACC	55	A	C	124	13	104	A/C	0.1048	SNP
Lib10^4 1 ng	TAG_BX_CCACACTTAACC	69	T	C	124	26	91	T/C	0.2097	SNP
Lib10^4 1 ng	TAG_BX_CCACCCATGAGG	55	A	C	72	10	59	A/C	0.1389	SNP
Lib10^4 1 ng	TAG_BX_CCACTAATTTAT	38	A	G	78	8	66	A/G	0.1026	SNP
Lib10^4 1 ng	TAG_BX_CCACTATCATGT	69	T	C	110	17	88	T/C	0.1545	SNP
Lib10^4 1 ng	TAG_BX_CCACTATCATGT	55	A	C	110	14	89	A/C	0.1273	SNP
Lib10^4 1 ng	TAG_BX_CCACTGATCCGT	74	A	G	109	11	92	A/G	0.1009	SNP
Lib10^4 1 ng	TAG_BX_CCACTTTTCTAA	69	T	C	127	23	98	T/C	0.1811	SNP
Lib10^4 1 ng	TAG_BX_CCAGAGTCCGTA	55	A	C	64	8	50	A/C	0.125	SNP
Lib10^4 1 ng	TAG_BX_CCAGATCCCAGG	55	A	C	86	16	67	A/C	0.186	SNP
Lib10^4 1 ng	TAG_BX_CCAGATCCCAGG	69	T	C	86	17	65	T/C	0.1977	SNP
Lib10^4 1 ng	TAG_BX_CCAGCGGTCAAC	69	T	C	247	38	194	T/C	0.1538	SNP
Lib10^4 1 ng	TAG_BX_CCAGCTCTCCGG	69	T	C	192	37	150	T/C	0.1927	SNP
Lib10^4 1 ng	TAG_BX_CCAGGCGTTTCG	55	A	C	180	37	132	A/C	0.2056	SNP
Lib10^4 1 ng	TAG_BX_CCAGGCTTATGT	69	T	C	98	16	81	T/C	0.1633	SNP
Lib10^4 1 ng	TAG_BX_CCAGGGTGCAAG	55	A	C	114	16	91	A/C	0.1404	SNP
Lib10^4 1 ng	TAG_BX_CCAGGTCGAGCA	69	T	C	115	32	81	T/C	0.2783	SNP
Lib10^4 1 ng	TAG_BX_CCAGGTGACGTA	69	T	C	72	15	53	T/C	0.2083	SNP
Lib10^4 1 ng	TAG_BX_CCAGTCCCTGGG	69	T	C	182	41	134	T/C	0.2253	SNP
Lib10^4 1 ng	TAG_BX_CCAGTTTCGGAT	55	A	C	92	15	73	A/C	0.163	SNP
Lib10^4 1 ng	TAG_BX_CCATACAGGGAT	69	T	C	104	23	77	T/C	0.2212	SNP
Lib10^4 1 ng	TAG_BX_CCATAGATCGAT	55	A	C	98	15	76	A/C	0.1531	SNP
Lib10^4 1 ng	TAG_BX_CCATAGGCGGTT	55	A	C	151	16	122	A/C	0.106	SNP
Lib10^4 1 ng	TAG_BX_CCATCAGTACGA	68	T	C	81	9	62	T/C	0.1111	SNP
Lib10^4 1 ng	TAG_BX_CCATCAGTACGA	69	T	C	81	23	57	T/C	0.284	SNP
Lib10^4 1 ng	TAG_BX_CCATCCCTGCTA	55	A	C	91	17	70	A/C	0.1868	SNP
Lib10^4 1 ng	TAG_BX_CCATCCCTGCTA	69	T	C	91	13	74	T/C	0.1429	SNP
Lib10^4 1 ng	TAG_BX_CCATCCGCGGTC	60	T	G	69	8	60	T/G	0.1159	SNP
Lib10^4 1 ng	TAG_BX_CCATCCGCGGTC	55	A	C	69	16	46	A/C	0.2319	SNP
Lib10^4 1 ng	TAG_BX_CCATCTTTAGCT	69	T	C	115	31	80	T/C	0.2696	SNP
Lib10^4 1 ng	TAG_BX_CCATGACTGTAA	55	A	C	174	20	139	A/C	0.1149	SNP
Lib10^4 1 ng	TAG_BX_CCATGATATGTT	55	A	C	128	27	96	A/C	0.2109	SNP
Lib10^4 1 ng	TAG_BX_CCATGCAATCTT	69	T	C	137	28	105	T/C	0.2044	SNP
Lib10^4 1 ng	TAG_BX_CCATGCCCGGCT	55	A	C	133	15	110	A/C	0.1128	SNP
Lib10^4 1 ng	TAG_BX_CCATGCTATCAG	69	T	C	136	26	102	T/C	0.1912	SNP
Lib10^4 1 ng	TAG_BX_CCATGGGAAATC	69	T	C	127	30	90	T/C	0.2362	SNP
Lib10^4 1 ng	TAG_BX_CCATGTAGTATA	69	T	C	113	28	80	T/C	0.2478	SNP
Lib10^4 1 ng	TAG_BX_CCATGTTAGCAA	69	T	C	115	24	84	T/C	0.2087	SNP
Lib10^4 1 ng	TAG_BX_CCATTATCTAAG	69	T	C	71	16	53	T/C	0.2254	SNP
Lib10^4 1 ng	TAG_BX_CCATTCATCACG	55	A	C	103	13	87	A/C	0.1262	SNP
Lib10^4 1 ng	TAG_BX_CCATTCCTCAGT	69	T	C	118	20	95	T/C	0.1695	SNP
Lib10^4 1 ng	TAG_BX_CCATTCGTCATT	55	A	C	81	12	62	A/C	0.1481	SNP
Lib10^4 1 ng	TAG_BX_CCATTGGCGGTG	55	A	C	198	21	163	A/C	0.1061	SNP
Lib10^4 1 ng	TAG_BX_CCATTGGCGGTG	69	T	C	198	36	157	T/C	0.1818	SNP
Lib10^4 1 ng	TAG_BX_CCATTTTAGATG	55	A	C	52	7	40	A/C	0.1346	SNP
Lib10^4 1 ng	TAG_BX_CCCAACAGCATC	69	T	C	187	44	133	T/C	0.2353	SNP
Lib10^4 1 ng	TAG_BX_CCCAACATCACA	69	T	C	69	17	50	T/C	0.2464	SNP
Lib10^4 1 ng	TAG_BX_CCCACATACATG	55	A	C	112	17	90	A/C	0.1518	SNP
Lib10^4 1 ng	TAG_BX_CCCAGCGCTTCC	69	T	C	46	9	35	T/C	0.1957	SNP
Lib10^4 1 ng	TAG_BX_CCCAGGAGTAAT	69	T	C	170	37	127	T/C	0.2176	SNP
Lib10^4 1 ng	TAG_BX_CCCAGGTCATAG	69	T	C	107	25	80	T/C	0.2336	SNP
Lib10^4 1 ng	TAG_BX_CCCAGGTTCTTA	55	A	C	129	14	109	A/C	0.1085	SNP
Lib10^4 1 ng	TAG_BX_CCCAGGTTCTTA	63	T	G	129	14	111	T/G	0.1085	SNP
Lib10^4 1 ng	TAG_BX_CCCAGTTGGTGG	69	T	C	144	29	112	T/C	0.2014	SNP
Lib10^4 1 ng	TAG_BX_CCCATGATGGTT	55	A	C	204	31	157	A/C	0.152	SNP
Lib10^4 1 ng	TAG_BX_CCCCCATTTGCG	69	T	C	115	24	83	T/C	0.2087	SNP
Lib10^4 1 ng	TAG_BX_CCCCCCGAATGT	38	A	G	70	9	59	A/G	0.1286	SNP
Lib10^4 1 ng	TAG_BX_CCCCCGAGAAAG	55	A	C	124	16	100	A/C	0.129	SNP
Lib10^4 1 ng	TAG_BX_CCCCCGAGAAAG	69	T	C	124	24	94	T/C	0.1935	SNP
Lib10^4 1 ng	TAG_BX_CCCCCGCGCATC	55	A	C	105	17	84	A/C	0.1619	SNP
Lib10^4 1 ng	TAG_BX_CCCCCGCGCATC	69	T	C	105	19	81	T/C	0.181	SNP
Lib10^4 1 ng	TAG_BX_CCCCGGAGCCTT	69	T	C	160	37	118	T/C	0.2313	SNP
Lib10^4 1 ng	TAG_BX_CCCCGGATAGCA	55	A	C	153	20	126	A/C	0.1307	SNP
Lib10^4 1 ng	TAG_BX_CCCCTTATTTTT	60	T	G	89	11	77	T/G	0.1236	SNP
Lib10^4 1 ng	TAG_BX_CCCCTTCCTTCT	55	A	C	127	13	108	A/C	0.1024	SNP
Lib10^4 1 ng	TAG_BX_CCCCTTGTGAGC	69	T	C	83	13	69	T/C	0.1566	SNP
Lib10^4 1 ng	TAG_BX_CCCCTTTTTGGA	69	T	C	158	29	120	T/C	0.1835	SNP
Lib10^4 1 ng	TAG_BX_CCCGAACGTCTT	55	A	C	98	11	76	A/C	0.1122	SNP
Lib10^4 1 ng	TAG_BX_CCCGACGGGTGC	69	T	C	137	31	100	T/C	0.2263	SNP
Lib10^4 1 ng	TAG_BX_CCCGAGTGACTT	69	T	C	126	23	101	T/C	0.1825	SNP
Lib10^4 1 ng	TAG_BX_CCCGAGTGCAGG	69	T	C	186	47	133	T/C	0.2527	SNP
Lib10^4 1 ng	TAG_BX_CCCGATACGCGG	69	T	C	108	22	84	T/C	0.2037	SNP
Lib10^4 1 ng	TAG_BX_CCCGATGTCTTG	69	T	C	82	20	56	T/C	0.2439	SNP
Lib10^4 1 ng	TAG_BX_CCCGATTAGTTG	69	T	C	200	34	163	T/C	0.17	SNP
Lib10^4 1 ng	TAG_BX_CCCGCCTCAATA	69	T	C	138	28	103	T/C	0.2029	SNP
Lib10^4 1 ng	TAG_BX_CCCGCCTCAATA	55	A	C	138	19	106	A/C	0.1377	SNP
Lib10^4 1 ng	TAG_BX_CCCGCCTCTCCC	69	T	C	54	16	37	T/C	0.2963	SNP
Lib10^4 1 ng	TAG_BX_CCCGCTCGAGTT	69	T	C	152	31	115	T/C	0.2039	SNP
Lib10^4 1 ng	TAG_BX_CCCGCTTCAATG	55	A	C	98	16	80	A/C	0.1633	SNP
Lib10^4 1 ng	TAG_BX_CCCGCTTTTTCC	69	T	C	101	20	76	T/C	0.198	SNP
Lib10^4 1 ng	TAG_BX_CCCGGAAATCGC	55	A	C	298	38	246	A/C	0.1275	SNP
Lib10^4 1 ng	TAG_BX_CCCGGTGATCGA	69	T	C	214	47	157	T/C	0.2196	SNP
Lib10^4 1 ng	TAG_BX_CCCGTCATATTC	69	T	C	61	13	43	T/C	0.2131	SNP
Lib10^4 1 ng	TAG_BX_CCCGTGTTATCT	69	T	C	151	28	112	T/C	0.1854	SNP
Lib10^4 1 ng	TAG_BX_CCCTACAGTGCC	69	T	C	138	32	102	T/C	0.2319	SNP
Lib10^4 1 ng	TAG_BX_CCCTACTTTCGC	69	T	C	108	26	77	T/C	0.2407	SNP
Lib10^4 1 ng	TAG_BX_CCCTATGTCGGT	69	T	C	115	31	83	T/C	0.2696	SNP
Lib10^4 1 ng	TAG_BX_CCCTCATGGAGC	55	A	C	117	16	96	A/C	0.1368	SNP
Lib10^4 1 ng	TAG_BX_CCCTGTCGAGTC	69	T	C	107	26	77	T/C	0.243	SNP
Lib10^4 1 ng	TAG_BX_CCCTGTCGAGTC	55	A	C	106	13	87	A/C	0.1226	SNP
Lib10^4 1 ng	TAG_BX_CCCTGTGTGATT	69	T	C	111	27	79	T/C	0.2432	SNP
Lib10^4 1 ng	TAG_BX_CCCTGTTTTCCT	55	A	C	108	15	86	A/C	0.1389	SNP
Lib10^4 1 ng	TAG_BX_CCCTTATTGTCG	69	T	C	164	28	131	T/C	0.1707	SNP
Lib10^4 1 ng	TAG_BX_CCCTTCTCCAGT	69	T	C	134	26	104	T/C	0.194	SNP
Lib10^4 1 ng	TAG_BX_CCCTTGGTCGTG	69	T	C	144	28	112	T/C	0.1944	SNP
Lib10^4 1 ng	TAG_BX_CCGACCCCGCCT	69	T	C	181	40	131	T/C	0.221	SNP
Lib10^4 1 ng	TAG_BX_CCGACCCCGCCT	55	A	C	181	31	136	A/C	0.1713	SNP
Lib10^4 1 ng	TAG_BX_CCGACTATTTGC	69	T	C	83	21	57	T/C	0.253	SNP
Lib10^4 1 ng	TAG_BX_CCGACTTGACGC	60	T	G	92	11	77	T/G	0.1196	SNP
Lib10^4 1 ng	TAG_BX_CCGACTTGACGC	55	A	C	92	16	66	A/C	0.1739	SNP
Lib10^4 1 ng	TAG_BX_CCGAGAAGTGTT	35	A	G	104	11	84	A/G	0.1058	SNP
Lib10^4 1 ng	TAG_BX_CCGAGAAGTGTT	69	T	C	104	14	87	T/C	0.1346	SNP
Lib10^4 1 ng	TAG_BX_CCGAGATGCTCG	55	A	C	183	28	142	A/C	0.153	SNP
Lib10^4 1 ng	TAG_BX_CCGAGTACTTAC	69	T	C	95	23	71	T/C	0.2421	SNP
Lib10^4 1 ng	TAG_BX_CCGAGTATGTAC	55	A	C	145	25	113	A/C	0.1724	SNP
Lib10^4 1 ng	TAG_BX_CCGATATTAACT	69	T	C	140	29	106	T/C	0.2071	SNP
Lib10^4 1 ng	TAG_BX_CCGATCGTGGTG	69	T	C	156	30	122	T/C	0.1923	SNP
Lib10^4 1 ng	TAG_BX_CCGATGGGTAGT	69	T	C	88	20	65	T/C	0.2273	SNP
Lib10^4 1 ng	TAG_BX_CCGATGGGTAGT	55	A	C	88	15	59	A/C	0.1705	SNP
Lib10^4 1 ng	TAG_BX_CCGATGTGGCTT	69	T	C	83	19	60	T/C	0.2289	SNP
Lib10^4 1 ng	TAG_BX_CCGATTTTTGCA	69	T	C	91	22	69	T/C	0.2418	SNP
Lib10^4 1 ng	TAG_BX_CCGCATTTGCGT	69	T	C	79	18	54	T/C	0.2278	SNP
[truncated: 29,145 more rows]
