# Supplementary material for: Development of a versatile high-throughput mutagenesis assay with multiplexed short-read NGS using DNA-barcoded supF shuttle vector library amplified in E. coli
Source: eLife journal article supplement (doi:10.7554/elife.83780), 2022-10-10
Supplement: supp [file elife-83780-supp-v1.zip › elife_poa_e83780_Supplementary_file_7.xlsx]

## Sheet: 7A
	Sample name	# of mutations/BC	1-Del	Del	Del-In	DNS	Ins	SNS		SNS; A>	SNS; C>	SNS; G>	SNS; T>
Lib104_#1	0 J/m2	1	1	11	-	-	-	51		-	29	18	4
		2	-	-	3	1	-	24		-	13	11	-
		3	-	-	2	-	-	22		-	5	14	3
		4	-	-	-	-	-	8		-	8	-	-
		5	-	-	-	1	-	9		-	9	-	-
	50 J/m2	1	7	9	22	36	1	315		10	135	162	8
		2	-	2	3	6	1	78		4	38	32	4
		3	-	-	1	4	1	24		1	14	9	-
		4	-	-	-	-	-	20		-	20	-	-
		5	-	-	-	-	-	5		-	5	-	-
		6	-	-	-	-	-	12		-	12	-	-
	100 J/m2	1	6	7	42	68	1	459		22	111	314	12
		2	3	1	11	17	-	156		9	80	61	6
		3	1	1	3	4	-	36		-	21	14	1
		4	-	-	1	1	-	30		-	25	5	-
		5	-	-	1	-	-	9		1	7	-	1
		6	-	-	-	2	-	4		-	4	-	-
	200 J/m2	1	6	5	64	49	1	500		34	121	332	13
		2	5	-	11	26	1	223		21	112	74	16
		3	1	-	1	7	-	63		6	41	14	2
		4	-	-	-	-	-	20		1	9	7	3
Lib104_#2	0 J/m2	1	1	7	-	3	-	56		1	28	25	2
		2	-	-	1	-	-	41		-	27	14	-
		3	-	-	5	-	-	19		-	6	8	5
		4	-	1	1	-	1	5		-	-	5	-
	50 J/m2	1	2	13	13	40	1	328		16	111	180	21
		2	2	-	7	8	-	93		4	44	42	3
		3	-	-	1	1	-	25		-	12	12	1
		4	-	1	-	1	-	10		-	9	1	-
		6	-	-	-	-	-	12		-	6	6	-
	100 J/m2	1	2	3	28	55	1	470		30	114	311	15
		2	2	-	8	9	-	137		13	71	40	13
		3	2	-	2	2	-	39		2	21	14	2
		4	1	-	-	3	-	20		-	10	10	-
		5	-	-	2	-	-	13		-	9	4	-
	200 J/m2	1	8	10	67	79	2	481		34	118	314	15
		2	3	2	26	28	3	226		25	102	86	13
		3	-	1	2	7	1	73		5	43	19	6
		4	-	-	-	-	-	20		-	15	5	-
		6	-	-	-	1	-	5		-	5	-	-

## Sheet: 7B
Sample name	# of mutations/BC		>A	>C	>G	>T
0 J/m2	1	A>	-	-	1	-
		C>	20	-	32	5
		G>	14	29	-	-
		T>	1	5	-	-
	2	C>	7	-	15	18
		G>	8	15	-	2
	3	C>	3	-	3	5
		G>	17	1	-	4
		T>	1	7	-	-
	4	C>	3	-	2	3
		G>	4	1	-	-
	5	C>	2	-	1	6
50 J/m2	1	A>	-	1	15	10
		C>	28	-	22	196
		G>	296	32	-	14
		T>	15	13	1	-
	2	A>	-	2	4	2
		C>	21	-	9	52
		G>	35	29	-	10
		T>	1	6	-	-
	3	A>	-	-	1	-
		C>	4	-	6	16
		G>	9	9	-	3
		T>	-	1	-	-
	4	C>	9	-	3	17
		G>	-	-	-	1
	5	C>	-	-	1	4
	6	C>	1	-	5	12
		G>	6	-	-	-
100 J/m2	1	A>	-	1	24	27
		C>	52	-	15	158
		G>	562	29	-	34
		T>	11	15	1	-
	2	A>	-	-	12	10
		C>	29	-	16	106
		G>	79	10	-	12
		T>	9	10	-	-
	3	A>	-	-	2	-
		C>	9	-	6	27
		G>	20	3	-	5
		T>	-	1	2	-
	4	C>	6	-	6	23
		G>	10	2	-	3
	5	A>	-	-	-	1
		C>	5	-	1	10
		G>	4	-	-	-
		T>	1	-	-	-
	6	C>	-	-	2	2
200 J/m2	1	A>	-	3	40	25
		C>	70	-	16	153
		G>	574	22	-	50
		T>	14	12	2	-
	2	A>	-	4	18	24
		C>	39	-	8	167
		G>	134	10	-	16
		T>	14	12	3	-
	3	A>	-	2	2	7
		C>	19	-	6	59
		G>	28	1	-	4
		T>	3	3	2	-
	4	A>	-	-	-	1
		C>	3	-	-	21
		G>	9	1	-	2
		T>	1	2	-	-
	6	C>	-	-	-	5

## Sheet: 7C
Sample name	# of mutations/BC	1-Del	Del	Del-In	DNS	Ins	SNS
0 J/m2	1	2	18	-	3	-	107
	2	-	-	4	1	-	65
	3	-	-	7	-	-	41
	4	-	1	1	-	1	13
	5	-	-	-	1	-	9
50 J/m2	1	9	22	35	76	2	643
	2	2	2	10	14	1	171
	3	-	-	2	5	1	49
	4	-	1	-	1	-	30
	5	-	-	-	-	-	5
	6	-	-	-	-	-	24
100 J/m2	1	8	10	70	123	2	929
	2	5	1	19	26	-	293
	3	3	1	5	6	-	75
	4	1	-	1	4	-	50
	5	-	-	3	-	-	22
	6	-	-	-	2	-	4
200 J/m2	1	14	15	131	128	3	981
	2	8	2	37	54	4	449
	3	1	1	3	14	1	136
	4	-	-	-	-	-	40
	6	-	-	-	1	-	5

## Sheet: 7D
Sample name	# of mutations/BC		>AA	>AC	>AG	>AT	>CA	>CG	>CT	>GA	>GG	>GT	>TA	>TC	>TG	>TT
0 J/m2	1	CC>	-	-	-	-	-	-	-	-	-	-	1	-	-	1
		GA>	-	-	-	1	-	-	-	-	-	-	-	-	-	-
	2	CC>	-	-	-	-	-	-	-	-	-	-	-	-	-	1
	4	CC>	-	-	-	-	-	-	-	-	-	-	1	-	-	-
50 J/m2	1	AG>	-	-	-	-	-	-	-	2	-	-	5	-	-	1
		AT>	-	-	-	-	-	-	-	1	-	-	4	1	-	-
		CA>	-	-	-	1	-	-	-	-	-	-	-	-	-	-
		CC>	-	-	-	5	-	-	-	-	-	-	1	-	-	15
		CG>	1	-	-	-	-	-	-	-	-	-	-	-	-	-
		CT>	-	-	-	-	-	-	-	-	-	-	1	1	-	-
		GA>	-	1	-	1	-	-	-	-	-	-	-	-	-	-
		GG>	18	-	-	9	-	-	-	-	-	-	2	-	-	-
		GT>	2	-	-	-	-	-	-	-	-	-	-	-	-	-
		TC>	-	-	-	2	1	-	-	-	-	1	-	-	-	-
	2	AA>	-	-	-	-	-	-	-	-	-	-	-	1	-	-
		CC>	-	-	-	1	-	-	-	-	-	-	-	-	-	5
		GA>	-	-	-	1	-	-	-	-	-	-	-	-	-	-
		GG>	3	-	-	1	-	-	-	-	-	-	-	-	-	-
		TC>	-	-	-	1	-	-	-	-	1	-	-	-	-	-
	3	AC>	-	-	-	-	-	-	-	-	-	-	-	-	-	1
		CC>	-	-	-	1	-	-	-	-	-	-	1	-	-	1
		GG>	1	-	-	-	-	-	-	-	-	-	-	-	-	-
	4	CC>	-	-	-	-	-	-	-	-	-	-	-	-	-	1
100 J/m2	1	AA>	-	-	-	-	-	-	-	-	-	-	-	1	-	6
		AC>	-	-	-	-	-	-	-	-	2	-	-	-	-	1
		AG>	-	-	-	-	1	-	-	3	-	-	13	-	-	-
		AT>	-	-	-	-	-	-	-	-	-	-	5	-	1	-
		CC>	2	-	-	4	-	-	-	-	-	3	2	-	-	13
		CT>	1	-	-	-	-	-	-	1	-	-	3	1	-	-
		GA>	-	1	2	-	-	-	-	-	-	-	-	-	-	-
		GG>	40	1	-	3	-	-	-	-	-	-	1	-	-	2
		GT>	2	-	-	-	-	-	-	-	-	-	1	-	-	-
		TA>	-	-	-	1	-	-	1	-	-	-	-	-	-	-
		TC>	-	-	-	2	-	-	-	-	-	-	-	-	-	-
		TG>	1	1	-	-	-	-	-	-	-	-	-	-	-	-
		TT>	1	-	-	-	-	-	-	-	-	-	-	-	-	-
	2	AG>	-	-	-	-	-	-	-	1	-	-	-	-	-	1
		CC>	-	-	-	3	-	-	-	-	-	-	1	-	-	5
		CG>	1	-	-	-	-	-	-	-	-	-	-	-	-	-
		CT>	-	-	-	-	-	-	-	-	-	-	3	-	-	-
		GA>	-	-	-	1	-	-	-	-	-	-	-	-	-	-
		GG>	5	-	-	2	-	-	-	-	-	-	1	-	-	-
		TC>	-	-	-	1	-	-	-	-	-	-	-	-	-	-
		TG>	1	-	-	-	-	-	-	-	-	-	-	-	-	-
	3	CC>	-	-	-	-	-	-	-	-	-	-	-	-	-	3
		GG>	2	-	-	1	-	-	-	-	-	-	-	-	-	-
	4	AT>	-	-	-	-	-	-	-	1	-	-	-	-	-	-
		CC>	-	-	-	-	-	-	-	-	-	-	-	-	-	2
		GA>	-	-	-	1	-	-	-	-	-	-	-	-	-	-
	6	CC>	-	-	-	-	-	-	-	-	-	-	-	-	-	2
200 J/m2	1	AA>	-	-	-	-	-	-	-	-	-	-	-	-	-	1
		AC>	-	-	-	-	-	-	-	-	-	1	-	-	-	2
		AG>	-	-	-	-	1	-	-	1	-	-	15	-	-	1
		AT>	-	-	-	-	-	-	-	-	-	-	9	-	-	-
		CC>	-	-	-	11	-	-	-	-	-	3	-	-	1	17
		CT>	2	-	-	-	-	-	-	1	-	-	3	2	1	-
		GA>	-	1	-	1	-	-	-	-	-	-	-	-	-	3
		GG>	31	-	-	6	1	-	-	-	-	-	4	-	-	1
		GT>	2	-	-	-	-	-	-	-	-	-	-	-	-	-
		TA>	-	-	-	1	-	-	-	-	-	-	-	-	-	-
		TC>	1	-	-	3	1	-	-	-	-	-	-	-	-	-
	2	AA>	-	-	-	-	-	-	-	-	-	-	-	-	1	-
		AC>	-	-	-	-	-	1	-	-	-	-	-	-	-	1
		AG>	-	-	-	-	-	-	-	-	-	-	3	-	-	-
		AT>	-	-	-	-	-	-	-	-	-	-	2	-	-	-
		CC>	-	-	-	1	-	-	-	-	-	1	2	-	-	14
		CG>	-	-	-	1	-	-	-	-	-	-	-	-	-	-
		CT>	1	-	-	-	-	-	-	-	-	-	1	-	-	-
		GA>	-	-	1	-	-	-	-	-	-	-	-	-	-	-
		GG>	12	-	-	1	-	-	-	-	-	-	3	-	-	-
		GT>	-	1	-	-	-	-	-	-	-	-	-	-	-	-
		TC>	-	-	2	3	1	-	-	-	-	1	-	-	-	-
	3	AG>	-	-	-	-	-	-	-	-	-	-	1	-	-	-
		AT>	-	-	-	-	-	-	-	1	-	-	1	-	1	-
		CC>	-	-	-	1	-	-	-	-	-	-	2	-	-	2
		GG>	1	-	-	-	-	-	-	-	-	-	-	-	-	-
		TC>	-	-	-	3	-	-	1	-	-	-	-	-	-	-
	6	CC>	-	-	-	-	-	-	-	-	-	-	-	-	-	1

## Sheet: 7E
Sample name	# of mutations/BC		>AAA	>AAAA	>AAAAA	>AAC	>AAG	>AAGT	>AAT	>AATG	>AATT	>ACAA	>ACT	>ACTA	>ACTT	>AG	>AGA	>AGC	>AGCATTACCCC	>AGG	>AGGGTTAGGGTTAGGGTTAGGGTTAGGGTTAGGGTTAGGGTTAGGGTTAGGGTTAGGGTTAGGGTTAGGGTTAGGGTTAGGGTTAGGGTTAGGGTTAGGGTTAGGGTTAGGGTTAGGGTTAGGGTTAGGGTTAGGGTTAGGGTTAGGGTTAGGGTTAGGGTTAGGGTTAGGGTTAGGGTTA	>AGT	>AT	>ATA	>ATCAA	ATCAAATGACGCATACAGGCTTCAAGATATCAAATGACATATCAAGATGCGTCAAGATATGTGGGG>	>ATG	>ATT	>ATTA	>ATTT	>CAA	>CACAGGTAAT	>CAGAA	>CAT	>CATA	>CCA	>CCAAAC	>CCT	>CCTT	>CCTTTT	>CGT	>CT	>CTA	>CTCT	>CTGAT	>CTT	>CTTT	>GA	>GAA
0 J/m2	2	GCATTACCT>	-	-	-	-	-	-	-	-	-	-	-	-	-	-	-	-	1	-	-	-	-	-	-	-	-	-	-	-	-	-	-	-	-	-	-	-	-	-	-	-	-	-	-	-	-	-	-
		TTGAT>	-	-	-	-	-	-	-	-	-	-	-	-	-	-	-	-	-	-	-	-	-	-	1	-	-	-	-	-	-	-	-	-	-	-	-	-	-	-	-	-	-	-	-	-	-	-	-
		TTGATATGATGCGCCCCGCTTCCCGATAAGGGAGCAGGCCAGTAAAAGCATTACCTGTGGTGGGGTTCCCGAGCGGCCAAAGGGAGCAGACTCTAAATCTGCCGTC>	-	-	-	-	-	-	-	-	-	-	-	-	-	-	-	-	-	-	-	-	-	-	1	-	-	-	-	-	-	-	-	-	-	-	-	-	-	-	-	-	-	-	-	-	-	-	-
		TTGATATGATGCGCCCCGCTTCCCGATAAGGGAGCAGGCCAGTAAAAGCATTACCTGTGGTGGGGTTCCCGAGCGGCCAAAGGGAGCAGACTCTAAATCTGCCGTCATCGACTTC>	-	-	-	-	-	-	-	-	-	-	-	-	-	-	-	-	-	-	-	-	-	-	-	1	-	-	-	-	-	-	-	-	-	-	-	-	-	-	-	-	-	-	-	-	-	-	-
	3	TTGAT>	-	-	-	-	-	-	-	-	-	-	-	-	-	-	-	-	-	-	-	-	-	-	7	-	-	-	-	-	-	-	-	-	-	-	-	-	-	-	-	-	-	-	-	-	-	-	-
	4	TTGAT>	-	-	-	-	-	-	-	-	-	-	-	-	-	-	-	-	-	-	-	-	-	-	1	-	-	-	-	-	-	-	-	-	-	-	-	-	-	-	-	-	-	-	-	-	-	-	-
50 J/m2	1	AAG>	-	-	-	-	-	-	-	-	-	-	-	-	-	-	-	-	-	-	-	-	-	-	-	-	-	-	-	-	-	-	-	-	-	-	-	-	-	-	-	-	-	-	-	-	-	-	-
		AAGG>	-	-	-	-	-	-	-	-	-	-	-	-	-	-	-	-	-	-	-	-	-	-	-	-	-	-	-	-	-	-	-	-	-	-	-	-	-	-	-	-	-	-	-	-	-	-	-
		AAT>	-	-	-	-	-	-	-	-	-	-	-	-	-	-	-	-	-	-	-	-	-	-	-	-	-	-	-	-	-	-	-	-	-	-	-	-	-	-	-	-	-	-	-	-	-	-	-
		ATTTGATATGATG>	-	-	-	-	-	-	-	-	-	-	-	-	-	-	-	-	-	-	-	-	-	-	-	-	-	-	-	-	-	-	-	-	-	-	-	-	-	-	-	-	-	-	-	-	-	-	-
		ATTTGATATGATGCGCCCCGCTTCCCGATAAGGGAGCAGGCCAGTAAAAGCATTACCTGTG>	-	-	-	-	-	-	-	-	-	-	-	-	-	-	-	-	-	-	-	-	-	-	-	-	-	-	-	-	-	1	-	-	-	-	-	-	-	-	-	-	-	-	-	-	-	-	-
		CCC>	-	-	-	-	-	-	-	-	-	-	-	-	-	-	-	-	-	-	-	-	1	-	-	-	-	-	-	-	-	-	-	-	-	-	-	-	-	-	-	-	-	-	-	-	-	-	-
		CCCCC>	-	-	-	-	-	-	-	-	-	-	-	-	-	-	-	-	-	-	-	-	-	-	-	-	-	-	-	-	-	-	-	-	-	-	-	-	-	-	-	-	-	-	-	-	-	-	-
		CCTT>	-	-	-	-	-	-	-	-	-	-	-	-	-	-	-	-	-	-	-	-	-	-	-	-	-	-	-	-	-	-	-	-	-	-	-	-	-	-	-	-	-	-	-	-	-	-	-
		CCTTC>	-	-	-	-	-	-	-	-	-	-	-	-	-	-	-	-	-	-	-	-	-	-	-	-	-	-	-	-	-	-	-	-	-	-	-	-	-	-	-	-	-	-	-	-	-	-	-
		CTTC>	-	-	-	-	-	-	-	-	-	-	-	-	-	-	-	-	-	-	-	-	-	-	-	-	-	-	-	-	-	-	-	-	-	-	-	-	-	-	-	-	-	-	-	-	-	-	-
		GAA>	-	-	-	-	1	-	-	-	-	-	-	-	-	-	-	-	-	-	-	-	-	-	-	-	-	-	-	-	-	-	-	-	-	-	-	-	-	-	-	-	-	-	-	-	-	-	-
		GAAG>	-	2	-	-	-	-	-	-	-	-	-	-	-	-	-	-	-	-	-	-	-	-	-	-	-	-	-	-	-	-	-	-	-	-	-	-	-	-	-	-	-	-	-	-	-	-	-
		GAC>	3	-	-	-	-	-	-	-	-	-	-	-	-	-	-	-	-	-	-	-	-	-	-	-	-	-	-	-	-	-	-	-	-	-	-	-	-	-	-	-	-	-	-	-	-	-	-
		GAG>	3	-	-	-	-	-	-	-	-	-	-	-	-	-	-	-	-	-	-	-	-	-	-	-	-	-	-	-	-	-	-	-	-	-	-	-	-	-	-	-	-	-	-	-	-	-	-
		GAT>	2	-	-	-	-	-	-	-	-	-	-	-	-	-	-	-	-	-	-	-	-	-	-	-	-	-	-	-	-	-	-	-	-	-	-	-	-	-	-	-	-	-	-	-	-	-	-
		GATA>	-	-	-	-	-	-	-	1	-	-	-	-	-	-	-	-	-	-	-	-	-	-	-	-	-	-	-	-	-	-	-	-	-	-	-	-	-	-	-	-	-	-	-	-	-	-	-
		GCAG>	-	-	-	-	-	-	-	-	-	1	-	-	-	-	-	-	-	-	-	-	-	-	-	-	-	-	-	-	-	-	-	-	-	-	-	-	-	-	-	-	-	-	-	-	-	-	-
		GGC>	1	-	-	-	-	-	-	-	-	-	-	-	-	-	-	-	-	-	-	-	-	-	-	-	-	-	-	-	-	-	-	-	-	-	-	-	-	-	-	-	-	-	-	-	-	-	-
		TCC>	-	-	-	-	-	-	-	-	-	-	-	-	-	-	-	-	-	-	-	-	-	-	-	-	-	-	-	-	-	-	-	-	-	1	-	-	-	-	-	-	-	-	-	1	-	-	-
		TTC>	-	-	-	-	-	-	-	-	-	-	-	-	-	-	-	-	-	-	-	-	-	1	-	-	-	2	-	-	-	-	-	-	-	-	-	-	-	-	-	-	-	-	-	1	-	-	-
	2	ATCGAC>	-	-	-	-	-	-	-	-	-	-	-	-	-	-	-	-	-	-	-	-	-	-	-	-	-	-	-	-	-	-	-	-	-	-	-	-	-	-	-	-	-	-	1	-	-	-	-
		CATC>	-	-	-	-	-	-	-	-	-	-	-	-	-	-	-	-	-	-	-	-	-	-	-	-	-	-	-	-	-	-	-	-	-	-	-	-	-	-	-	-	-	-	-	-	-	-	-
		CATCC>	-	-	-	-	-	-	-	-	-	-	-	-	-	-	-	-	-	-	-	-	-	-	-	-	-	-	-	-	-	-	-	-	-	-	-	-	-	-	-	-	-	-	-	-	-	-	-
		CCCCC>	-	-	-	-	-	-	-	-	-	-	-	-	-	-	-	-	-	-	-	-	-	-	-	-	-	-	-	-	-	-	-	-	-	-	-	-	-	-	-	-	-	-	-	-	-	-	-
		GAC>	1	-	-	-	-	-	-	-	-	-	-	-	-	-	-	-	-	-	-	-	-	-	-	-	-	-	-	-	-	-	-	-	-	-	-	-	-	-	-	-	-	-	-	-	-	-	-
		GAG>	1	-	-	-	-	-	-	-	-	-	-	-	-	-	-	-	-	-	-	-	-	-	-	-	-	-	-	-	-	-	-	-	-	-	-	-	-	-	-	-	-	-	-	-	-	-	-
		GGA>	-	-	-	-	-	-	-	-	-	-	-	-	-	-	-	-	-	-	-	-	-	-	-	-	1	-	-	-	-	-	-	-	-	-	-	-	-	-	-	-	-	-	-	-	-	-	-
		GGG>	-	-	-	-	-	-	1	-	-	-	-	-	-	-	-	-	-	-	-	-	-	-	-	-	-	-	-	-	-	-	-	-	-	-	-	-	-	-	-	-	-	-	-	-	-	-	-
		TCC>	-	-	-	-	-	-	-	-	-	-	1	-	-	-	-	-	-	-	-	-	-	-	-	-	-	-	-	-	-	-	-	-	-	-	-	-	-	-	-	-	-	-	-	-	-	-	-
		TTGAT>	-	-	-	-	-	-	-	-	-	-	-	-	-	-	-	-	-	-	-	-	-	-	1	-	-	-	-	-	-	-	-	-	-	-	-	-	-	-	-	-	-	-	-	-	-	-	-
	3	CCTTCC>	-	-	-	-	-	-	-	-	-	-	-	-	-	-	-	-	-	-	-	-	-	-	-	-	-	-	-	-	-	-	-	-	-	-	-	-	-	-	-	-	-	-	-	-	-	-	-
		GTTC>	-	-	-	-	-	-	1	-	-	-	-	-	-	-	-	-	-	-	-	-	-	-	-	-	-	-	-	-	-	-	-	-	-	-	-	-	-	-	-	-	-	-	-	-	-	-	-
100 J/m2	1	AAG>	-	-	-	-	-	-	-	-	-	-	-	-	-	-	-	-	-	-	-	-	-	-	-	-	-	-	-	-	-	-	-	-	-	-	-	-	-	-	-	-	-	-	-	-	-	-	2
		AAGG>	-	-	-	-	-	-	-	-	-	-	-	-	-	-	-	-	-	-	-	-	-	-	-	-	-	-	-	-	-	-	-	-	-	-	-	-	-	-	-	-	-	-	-	-	-	-	-
		AAGGG>	-	-	-	-	-	-	-	-	-	-	-	-	-	-	-	-	-	-	-	-	-	-	-	-	-	-	-	-	-	-	-	-	-	-	-	-	-	-	-	-	-	-	-	-	-	-	-
		CAC>	1	-	-	-	-	-	-	-	-	-	-	-	-	-	-	-	-	-	-	-	-	-	-	-	-	-	-	-	-	-	-	-	-	-	-	-	-	-	-	-	-	-	-	-	-	-	-
		CCC>	-	-	-	-	-	-	-	-	-	-	-	-	-	-	-	-	-	-	-	-	-	-	-	-	-	-	-	-	-	-	-	-	-	-	-	-	-	-	-	-	-	-	-	-	-	-	-
		CCCC>	-	-	-	-	-	-	-	-	-	-	-	-	-	-	-	-	-	-	-	-	-	-	-	-	-	-	-	-	-	-	-	-	-	-	-	-	-	-	-	-	-	-	-	-	-	-	-
		CCTT>	-	-	-	-	-	-	-	-	-	-	-	1	-	-	-	-	-	-	-	-	-	-	-	-	-	-	-	-	-	-	-	-	-	-	-	-	-	-	-	-	-	-	-	-	-	-	-
		CCTTC>	-	-	-	-	-	-	-	-	-	-	-	-	-	-	-	-	-	-	-	-	-	-	-	-	-	-	-	-	-	-	-	-	-	-	-	-	-	-	-	-	-	-	-	-	-	-	-
		CGAA>	-	-	-	-	-	-	-	-	-	-	-	-	-	-	-	-	-	-	-	-	-	-	-	-	-	-	-	-	-	-	-	-	-	-	-	-	-	-	-	-	-	-	-	-	-	-	-
		CTTC>	-	-	-	-	-	-	-	-	-	-	-	-	-	-	-	-	-	-	-	-	-	-	-	-	-	-	-	-	-	-	-	-	-	-	-	-	-	-	-	-	-	-	-	-	-	-	-
		GAC>	6	-	-	-	-	-	-	-	-	-	-	-	-	-	-	-	-	-	-	-	-	-	-	-	-	-	-	-	-	-	-	-	-	-	-	-	-	-	-	-	-	-	-	-	-	-	-
		GAG>	20	-	-	-	-	-	-	-	-	-	-	-	-	-	-	-	-	-	-	-	-	-	-	-	-	-	-	-	-	-	-	-	-	-	-	-	-	-	-	-	-	-	-	-	-	-	-
		GAT>	4	-	-	-	-	-	-	-	-	-	-	-	-	-	-	-	-	-	-	-	-	-	-	-	-	-	-	-	-	-	-	-	-	-	-	-	-	-	-	-	-	-	-	-	-	-	-
		GATA>	-	-	-	-	-	-	-	-	-	-	-	-	-	-	-	-	-	-	-	-	-	-	-	-	-	-	-	-	-	-	-	-	-	-	-	-	-	-	-	-	-	-	-	-	-	-	-
		GGA>	-	-	-	-	-	-	-	-	-	-	-	-	-	-	-	-	-	1	-	-	-	-	-	-	-	-	-	-	-	-	-	-	-	-	-	-	-	-	-	-	-	-	-	-	-	-	-
		GGG>	-	-	-	-	-	-	-	-	-	-	-	-	-	-	-	-	-	-	-	1	-	1	-	-	-	-	-	-	-	-	-	-	-	-	-	-	-	-	-	-	-	-	-	-	-	-	-
		TCC>	-	-	-	-	-	-	-	-	-	-	-	-	-	-	-	-	-	-	-	-	-	-	-	-	-	-	-	-	-	-	-	-	-	-	-	-	-	-	-	-	-	-	-	-	-	-	-
		TTC>	-	-	-	-	-	-	-	-	-	-	-	-	-	-	-	-	-	-	-	-	-	1	-	-	-	1	-	-	-	-	-	1	-	-	-	-	-	-	-	-	-	-	-	3	-	-	-
	2	AAGGG>	-	-	-	-	-	-	-	-	-	-	-	-	-	-	-	-	-	-	-	-	-	-	-	-	-	-	-	-	-	-	1	-	-	-	-	-	-	-	-	-	-	-	-	-	-	-	-
		CATC>	-	-	-	-	-	-	-	-	-	-	-	-	-	-	-	-	-	-	-	-	-	-	-	-	-	-	-	-	-	-	-	-	-	-	-	-	-	-	-	-	-	-	-	-	-	-	-
		CT>	-	-	-	-	-	-	-	-	-	-	-	-	-	-	-	-	-	-	-	-	-	-	-	-	-	-	-	-	-	-	-	-	-	-	-	-	-	-	-	-	-	-	-	-	-	-	-
		CTC>	-	-	-	-	-	-	-	-	-	-	-	-	-	-	-	-	-	-	-	-	-	-	-	-	-	-	-	-	-	-	-	-	-	-	-	-	-	-	-	-	-	-	-	-	-	-	-
		CTTC>	-	-	-	-	-	-	-	-	-	-	-	-	-	-	-	-	-	-	-	-	-	-	-	-	-	-	-	-	-	-	-	-	-	-	-	-	-	-	-	-	-	-	-	-	-	-	-
		GAAG>	-	-	-	-	-	-	-	-	-	-	-	-	-	-	-	-	-	-	-	-	-	1	-	-	-	-	-	-	-	-	-	-	-	-	-	-	-	-	-	-	-	-	-	-	-	-	-
		GAC>	2	-	-	-	-	-	-	-	-	-	-	-	-	-	-	-	-	-	-	-	-	-	-	-	-	-	-	-	-	-	-	-	-	-	-	-	-	-	-	-	-	-	-	-	-	-	-
		GAG>	4	-	-	-	-	-	-	-	-	-	-	-	-	-	-	-	-	-	-	-	-	-	-	-	-	-	-	-	-	-	-	-	-	-	-	-	-	-	-	-	-	-	-	-	-	-	-
		GGA>	-	-	-	-	-	-	1	-	-	-	-	-	-	-	-	-	-	1	-	-	-	-	-	-	-	-	-	-	-	-	-	-	-	-	-	-	-	-	-	-	-	-	-	-	-	-	-
		GGG>	-	-	-	-	-	-	-	-	-	-	-	-	-	-	-	-	-	-	-	1	-	-	-	-	-	-	-	-	-	-	-	-	-	-	-	-	-	-	-	-	-	-	-	-	-	-	-
		GTTC>	-	-	-	-	-	-	-	-	-	-	-	-	-	-	-	-	-	-	-	-	-	-	-	-	-	-	1	-	-	-	-	-	-	-	-	-	-	-	-	-	-	-	-	-	-	-	-
		TCGAAT>	-	-	-	-	-	-	-	-	-	-	-	-	-	-	-	-	-	-	-	-	-	-	-	-	-	-	-	-	-	-	-	-	-	-	1	-	-	-	-	-	-	-	-	-	-	-	-
		TTC>	-	-	-	-	-	-	-	-	-	-	-	-	-	-	-	-	-	-	-	-	-	-	-	-	-	1	-	-	-	-	-	-	-	-	-	-	-	-	-	-	-	-	-	-	-	-	-
	3	CATC>	-	-	-	-	-	-	-	-	-	-	-	-	-	-	-	-	-	-	-	-	-	-	-	-	-	-	-	-	-	-	-	-	-	-	-	-	-	-	-	-	-	-	-	-	-	-	-
		GAG>	1	-	-	-	-	-	-	-	-	-	-	-	-	-	-	-	-	-	-	-	-	-	-	-	-	-	-	-	-	-	-	-	-	-	-	-	-	-	-	-	-	-	-	-	-	-	-
		GTCC>	-	-	-	-	-	-	-	-	-	-	-	-	-	-	-	-	-	-	-	-	-	-	-	-	-	-	-	-	-	-	-	-	-	-	-	-	-	-	-	-	-	1	-	-	-	-	-
		TCCTTC>	-	-	-	-	-	-	-	-	-	-	-	-	-	-	-	-	-	-	-	-	-	-	-	-	-	-	-	-	-	-	-	-	-	-	-	-	-	1	-	-	-	-	-	-	-	-	-
	4	CATC>	-	-	-	-	-	-	-	-	1	-	-	-	-	-	-	-	-	-	-	-	-	-	-	-	-	-	-	-	-	-	-	-	-	-	-	-	-	-	-	-	-	-	-	-	-	-	-
	5	CATC>	-	-	-	-	-	-	-	-	-	-	-	-	-	-	-	-	-	-	-	-	-	-	-	-	-	-	-	-	-	-	-	-	-	-	-	-	-	-	-	-	-	-	-	-	-	-	-
		GCAG>	-	-	-	-	-	-	-	-	-	1	-	-	-	-	-	-	-	-	-	-	-	-	-	-	-	-	-	-	-	-	-	-	-	-	-	-	-	-	-	-	-	-	-	-	-	-	-
		GTCA>	-	-	-	-	-	-	-	-	-	-	-	-	-	-	-	-	-	-	-	-	-	-	-	-	-	-	-	-	-	-	-	-	-	-	-	-	-	-	-	-	-	-	-	-	1	-	-
200 J/m2	1	AA>	-	-	-	-	-	-	-	-	-	-	-	-	-	-	-	-	-	-	-	-	-	-	-	-	-	-	-	-	-	-	-	-	-	-	-	-	-	-	-	-	-	-	-	-	-	-	-
		AAG>	-	-	-	-	-	-	-	-	-	-	-	-	-	-	-	-	-	-	-	-	-	-	-	-	-	-	-	-	-	-	-	1	-	-	-	-	-	-	-	-	-	-	-	-	-	-	2
		AAGG>	-	-	-	-	-	-	-	-	-	-	-	-	-	-	-	-	-	-	-	-	-	-	-	-	-	-	-	-	-	-	-	-	-	-	-	-	-	-	-	-	-	-	-	-	-	-	-
		AGC>	-	-	-	-	-	-	-	-	-	-	-	-	-	-	-	-	-	-	-	-	-	-	-	-	-	-	-	-	-	-	-	-	-	-	-	-	-	-	-	-	-	-	-	-	-	1	-
		CAA>	-	-	-	-	-	-	1	-	-	-	-	-	-	-	-	-	-	-	-	-	-	-	-	-	-	-	-	-	-	-	-	-	-	-	-	-	-	-	-	-	-	-	-	-	-	-	-
		CAG>	-	-	-	1	-	-	-	-	-	-	-	-	-	-	-	-	-	-	-	-	-	-	-	-	-	-	-	-	-	-	-	-	-	-	-	-	-	-	-	-	-	-	-	-	-	-	-
		CCC>	-	-	-	-	-	-	-	-	-	-	1	-	-	-	-	-	-	-	-	-	-	-	-	-	-	-	-	-	-	-	-	-	-	-	-	-	-	-	-	-	-	-	-	-	-	-	-
		CCCC>	-	-	-	-	-	-	-	-	-	-	-	-	-	-	-	-	-	-	-	-	-	-	-	-	-	-	-	-	-	-	-	-	-	-	-	-	-	-	-	-	-	-	-	-	-	-	-
		CCTT>	-	-	-	-	-	-	-	-	-	-	-	-	-	-	-	-	-	-	-	-	-	-	-	-	-	-	-	-	-	-	-	-	-	-	-	-	-	-	-	-	-	-	-	-	-	-	-
		CGA>	-	-	-	-	-	-	-	-	-	-	-	-	-	-	-	-	-	-	-	-	-	-	-	-	-	-	-	-	-	-	-	-	-	-	-	-	-	-	-	-	-	-	-	-	-	-	-
		CTGC>	-	-	-	-	-	-	-	-	-	-	-	-	-	-	-	-	-	-	-	-	-	-	-	-	-	-	-	-	-	-	-	-	-	-	-	-	-	-	-	-	-	-	-	-	-	-	-
		CTTC>	-	-	-	-	-	-	-	-	-	-	-	-	-	-	-	-	-	-	-	-	-	-	-	-	-	-	-	-	-	-	-	-	-	-	-	-	-	-	-	-	-	-	-	-	-	-	-
		GAA>	-	-	-	-	1	-	-	-	-	-	-	-	-	-	-	-	-	-	-	-	1	-	-	-	-	-	-	-	-	-	-	-	-	-	-	-	-	-	-	-	-	-	-	-	-	-	-
		GAAG>	-	3	-	-	-	-	-	-	-	1	-	-	-	-	-	-	-	-	-	-	-	-	-	-	-	-	-	-	-	-	-	-	-	-	-	-	-	-	-	-	-	-	-	-	-	-	-
		GAAGG>	-	-	1	-	-	-	-	-	-	-	-	-	-	-	-	-	-	-	-	-	-	-	-	-	-	-	-	-	-	-	-	-	-	-	-	-	-	-	-	-	-	-	-	-	-	-	-
		GAC>	13	-	-	-	-	-	-	-	-	-	-	-	-	-	-	-	-	-	-	-	-	-	-	-	-	-	-	-	-	-	-	-	-	-	-	-	-	-	-	-	-	-	-	-	-	-	-
		GAG>	38	-	-	-	-	-	-	-	-	-	-	-	-	-	-	-	-	-	-	-	-	-	-	-	-	-	-	-	-	-	-	-	-	-	-	-	-	-	-	-	-	-	-	-	-	-	-
		GAGC>	-	-	-	-	-	1	-	-	-	-	-	-	-	-	-	-	-	-	-	-	-	-	-	-	-	-	-	-	-	-	-	-	-	-	-	-	-	-	-	-	-	-	-	-	-	-	-
		GAT>	11	-	-	-	-	-	-	-	-	-	-	-	-	-	-	-	-	-	-	-	-	-	-	-	-	-	-	-	-	-	-	-	-	-	-	-	-	-	-	-	-	-	-	-	-	-	-
		GCA>	-	-	-	-	-	-	-	-	-	-	-	-	-	-	-	-	-	-	-	-	-	-	-	-	-	-	-	-	-	-	-	-	-	-	-	-	-	-	-	1	-	-	-	-	-	-	-
		GCCA>	-	-	-	-	-	-	-	-	-	-	-	-	-	-	-	-	-	-	-	-	-	-	-	-	-	-	-	-	-	-	-	-	-	-	-	-	1	-	-	-	-	-	-	-	-	-	-
		GGA>	-	-	-	-	1	-	-	-	-	-	-	-	-	-	-	-	-	-	-	-	-	-	-	-	-	-	-	-	-	-	-	-	-	-	-	-	-	-	-	-	-	-	-	-	-	-	-
		GGAG>	-	-	-	-	-	-	-	-	-	-	-	-	-	-	-	-	-	-	-	-	-	-	-	-	-	-	-	-	-	-	-	-	1	-	-	-	-	-	-	-	-	-	-	-	-	-	-
		GGG>	3	-	-	-	-	-	-	-	-	-	-	-	-	-	-	-	-	-	-	-	-	-	-	-	-	-	-	-	-	-	-	-	-	-	-	-	-	-	-	-	-	-	-	-	-	-	-
		GTCATC>	-	-	-	-	-	-	-	-	-	-	-	-	-	-	-	-	-	-	-	-	-	-	-	-	-	-	-	-	-	-	-	-	-	-	-	-	-	-	-	-	-	-	-	-	-	-	-
		TCC>	-	-	-	-	-	-	2	-	-	-	-	-	-	-	-	-	-	-	-	-	-	-	-	-	-	-	-	-	1	-	-	-	-	-	-	1	-	-	-	1	-	-	-	-	-	-	-
		TCTA>	-	-	-	-	-	-	-	-	-	-	-	-	1	-	-	-	-	-	-	-	-	-	-	-	-	-	-	-	-	-	-	-	-	-	-	-	1	-	-	-	-	-	-	-	-	-	-
		TTACAGCGGCGCGTCATTTGATATGATGCGCCCCGCTTCCCGATAAGGGAGCAGGCCAGTAAAAGCATTACCTGTGGTGGGGTTCCCGAGCGGCCAAAGGGAGCAGACTCTAAATCTGCCGTCATCGACTTCGAAGGTTCGAATCCTTCCCCCACCACCATCACTTTCAAAAGTCCGAAAAGATCCGGCGGCGCAGCACCTCATCCTCAGCGATATGGCAGCTTATAAT>	-	-	-	-	-	-	-	-	-	-	-	-	-	-	-	-	-	-	1	-	-	-	-	-	-	-	-	-	-	-	-	-	-	-	-	-	-	-	-	-	-	-	-	-	-	-	-
		TTACCTGTGGTGGGGTTCCCGAGCGGCCAAAGGGAGCAGACTCTAAATCTGCCGTCATCGACTTCGAAGGTTCGAATCCTTCCCCCACCACCATCACTTTCAAAAGTCCGAAAAGATCC>	-	-	-	-	-	-	-	-	-	-	-	-	-	-	-	-	-	-	-	-	-	-	-	-	-	-	-	-	-	-	-	-	-	-	-	1	-	-	-	-	-	-	-	-	-	-	-
		TTC>	-	-	-	-	-	-	1	-	-	-	-	-	-	-	-	-	-	-	-	-	-	-	-	-	-	-	-	1	-	-	-	-	-	-	-	-	-	-	-	-	1	-	-	1	-	-	-
	2	AAG>	-	-	-	-	-	-	-	-	-	-	-	-	-	-	-	-	-	-	-	-	-	-	-	-	-	-	-	-	-	-	-	-	-	-	-	-	-	-	-	-	-	-	-	-	-	-	-
		AGGG>	-	-	-	-	-	-	-	-	-	-	-	-	-	-	-	-	-	-	-	-	-	-	-	-	-	-	-	-	-	-	-	-	-	-	-	-	-	-	-	-	-	-	-	-	-	-	-
		CCA>	-	-	-	-	-	-	-	-	-	-	-	-	-	-	-	-	-	-	-	-	-	-	-	-	-	-	-	-	-	-	-	-	-	-	-	-	-	-	-	-	-	-	-	-	-	-	-
		CCC>	-	-	-	-	-	-	-	-	-	-	-	-	-	-	-	-	-	-	-	-	-	-	-	-	-	-	-	-	-	-	-	-	-	-	-	-	-	-	-	-	-	-	-	-	-	-	-
		CCTT>	-	-	-	-	-	-	-	-	-	-	-	-	-	-	-	-	-	-	-	-	-	-	-	-	-	-	-	-	-	-	-	-	-	-	-	-	-	-	-	-	-	-	-	-	-	-	-
		CGTCATTTGATATGATGCGCCCCGCTTCCCGATAAGGGAGCAGGCCAGTAAAAGCATTACCTGTGGTGGGGTTCCCGAGCGGCCAAAGGGAGCAGACTCT>	-	-	-	-	-	-	-	-	-	-	-	-	-	-	-	-	-	-	-	-	-	-	-	-	-	-	-	-	-	-	-	-	-	-	-	-	-	-	-	-	-	-	-	-	-	-	-
		CTT>	-	-	-	-	-	-	-	-	-	-	-	-	-	-	-	-	-	-	-	-	-	-	-	-	-	-	-	-	-	-	-	-	-	-	-	-	-	-	-	-	-	-	-	-	-	-	-
		CTTC>	-	-	-	-	-	-	-	-	-	-	-	-	-	-	-	-	-	-	-	-	-	-	-	-	-	-	-	-	-	-	-	-	-	-	-	-	-	-	-	-	-	-	-	-	-	-	-
		GAA>	-	-	-	-	-	-	1	-	-	-	-	-	-	-	-	-	-	-	-	-	-	-	-	-	-	-	-	-	-	-	-	-	-	-	-	-	-	-	-	-	-	-	-	-	-	-	-
		GAAG>	-	-	-	-	-	-	-	-	-	-	-	-	-	-	-	-	-	-	-	-	-	-	-	-	-	-	-	-	-	-	-	-	-	-	-	-	-	-	-	-	-	-	-	-	-	-	-
		GAG>	10	-	-	-	-	-	-	-	-	-	-	-	-	-	-	-	-	-	-	-	-	-	-	-	-	-	-	-	-	-	-	-	-	-	-	-	-	-	-	-	-	-	-	-	-	-	-
		GAT>	3	-	-	-	-	-	-	-	-	-	-	-	-	-	-	-	-	-	-	-	-	-	-	-	-	-	-	-	-	-	-	-	-	-	-	-	-	-	-	-	-	-	-	-	-	-	-
		GATA>	-	-	-	-	-	-	-	-	-	-	-	-	-	-	-	-	-	-	-	-	-	-	-	-	-	-	-	-	-	-	-	-	-	-	-	-	-	-	-	-	-	-	-	-	-	-	-
		GGA>	-	-	-	-	-	-	-	-	-	-	-	-	-	-	-	1	-	-	-	-	-	-	-	-	-	-	-	-	-	-	-	-	-	-	-	-	-	-	-	-	-	-	-	-	-	-	-
		GGG>	-	-	-	-	-	-	-	-	-	-	-	-	-	-	1	-	-	-	-	-	-	-	-	-	-	-	-	-	-	-	-	-	-	-	-	-	-	-	-	-	-	-	-	-	-	-	-
		GGT>	-	-	-	-	-	-	-	-	-	-	-	-	-	1	-	-	-	-	-	-	-	-	-	-	-	-	-	-	-	-	-	-	-	-	-	-	-	-	-	-	-	-	-	-	-	-	-
		TAA>	-	-	-	-	-	-	1	-	-	-	-	-	-	-	-	-	-	-	-	-	-	-	-	-	-	-	-	-	-	-	-	-	-	-	-	-	-	-	-	-	-	-	-	-	-	-	-
		TCTA>	-	-	-	-	-	-	-	-	-	-	-	-	-	-	-	-	-	-	-	-	-	-	-	-	-	-	-	-	-	-	-	-	-	-	-	-	1	-	-	-	-	-	-	-	-	-	-
		TTC>	-	-	-	-	-	-	-	-	-	-	-	-	-	-	-	-	-	-	-	-	-	-	-	-	-	2	-	-	-	-	-	-	-	-	-	-	-	-	-	-	1	-	-	-	-	-	-
	3	CACC>	-	-	-	-	-	-	-	-	-	-	-	-	-	-	-	-	-	-	-	-	-	-	-	-	-	-	-	-	-	-	-	-	-	-	-	-	-	-	-	-	-	-	-	-	-	-	-
		CATC>	-	-	-	-	-	-	-	-	1	-	-	-	-	-	-	-	-	-	-	-	-	-	-	-	-	-	-	-	-	-	-	-	-	-	-	-	-	-	-	-	-	-	-	-	-	-	-
		TCC>	-	-	-	-	-	-	-	-	-	-	-	-	-	-	-	-	-	-	-	-	-	-	-	-	-	-	-	-	-	-	-	-	-	-	-	-	-	-	1	-	-	-	-	-	-	-	-
[truncated: 34 more columns]
