# Supplementary material for: Development of a versatile high-throughput mutagenesis assay with multiplexed short-read NGS using DNA-barcoded supF shuttle vector library amplified in E. coli
Source: eLife. 2022 Oct 10;11:e83780. doi: 10.7554/eLife.83780 (PMC9584611; doi:10.7554/eLife.83780)
Supplement: Supplementary file 4. [file elife-83780-supp4.xlsx]

## Sheet: 4A
Sample name	BC	Position	Reference sequence	Alt variant sequence	Depth - total coverage	AltDepth - variant coverage	RefFwdReads - reference forward strand coverage	Genotype - genotype description string	AF - allele frequency	Genotype
Lib10^4_#1 0_Jm^2 Selection	TAG_BX_ATTATGCGTTTC	77	G	GGCC	246	189	49	G/GGCC	0.7683	Ins
Lib10^4_#1 0_Jm^2 Selection	TAG_BX_AGGAGTGGCTGG	130	C	G	701	587	110	C/G	0.8374	SNP
Lib10^4_#1 0_Jm^2 Selection	TAG_BX_CATACGTTCACT	134	C	A	45	36	7	C/A	0.8	SNP
Lib10^4_#1 0_Jm^2 Selection	TAG_BX_CGAATTATATGG	12	T	G	2059	1926	120	T/G	0.9354	SNP
Lib10^4_#1 0_Jm^2 Selection	TAG_BX_CTACTCATGATC	103	G	C	1926	1501	396	G/C	0.7793	SNP
Lib10^4_#1 0_Jm^2 Selection	TAG_BX_GCCGATGCATAT	95	C	G	2583	2164	397	C/G	0.8378	SNP
Lib10^4_#1 0_Jm^2 Selection	TAG_BX_GCCGGGTAGAGG	106	G	C	89	9	80	G/C	0.1011	SNP
Lib10^4_#1 0_Jm^2 Selection	TAG_BX_GCCGGGTAGAGG	12	T	G	89	18	69	T/G	0.2022	SNP
Lib10^4_#1 0_Jm^2 Selection	TAG_BX_GCGTTTTGTTGT	5	G	A	52	49	3	G/A	0.9423	SNP
Lib10^4_#1 0_Jm^2 Selection	TAG_BX_GTGTGCTTGCGT	74	A	T	1414	1168	206	A/T	0.826	SNP
Lib10^4_#1 0_Jm^2 Selection	TAG_BX_TAAAAGGGTGAC	12	T	G	1547	1454	83	T/G	0.9399	SNP
Lib10^4_#1 0_Jm^2 Selection	TAG_BX_TCCTTGCAGCCT	134	C	A	368	276	79	C/A	0.75	SNP
Lib10^4_#1 0_Jm^2 Selection	TAG_BX_TGGAGGGATTAG	12	T	G	3428	3233	174	T/G	0.9431	SNP
Lib10^4_#1 0_Jm^2 Selection	TAG_BX_TGTGCCTTGTGT	106	G	C	2008	1646	334	G/C	0.8197	SNP
Lib10^4_#1 0_Jm^2 Selection	TAG_BX_TTTCATAGCTGG	130	C	G	3618	2914	686	C/G	0.8054	SNP
Lib10^4_#1 0_Jm^2 Selection	TAG_BX_TTTTCGTGTGGT	85	G	T	1762	1486	258	G/T	0.8434	SNP
Lib10^4_#1 0_Jm^2 Selection	TAG_BX_GAGCGACTGGTG	30	AAGGGAGCAGGCCAGTAAAAGCATTACCTGTGGTGGGGTTCCCGAGCGGCCA		5768	5186	509	AAGGGAGCAGGCCAGTAAAAGCATTACCTGTGGTGGGGTTCCCGAGCGGCCA/	0.8991	Del
Lib10^4_#1 0_Jm^2 Selection	TAG_BX_GAGTTTCGTGTC	134	C		2617	2015	563	C/	0.77	1Del
Lib10^4_#1 0_Jm^2 Selection	TAG_BX_GCCGGGTAGAGG	30	AAGGGAGCAGGCCAGTAAAAGCATTACCTGTGGTGGGGTTCCCGAGCGGCCA		89	24	64	AAGGGAGCAGGCCAGTAAAAGCATTACCTGTGGTGGGGTTCCCGAGCGGCCA/	0.2697	Del
Lib10^4_#1 0_Jm^2 Selection	TAG_BX_GCCGGGTAGAGG	-55	A		90	88	2	A/	0.9778	1Del
Lib10^4_#2 0_Jm^2 Selection	TAG_BX_AGCTTTGCTGTG	75	G	C	466	393	67	G/C	0.8433	SNP
Lib10^4_#2 0_Jm^2 Selection	TAG_BX_CAAAATGTGGCA	68	T	G	252	219	28	T/G	0.869	SNP
Lib10^4_#2 0_Jm^2 Selection	TAG_BX_CATAGTGCAGCG	124	T	G	422	316	100	T/G	0.7488	SNP
Lib10^4_#2 0_Jm^2 Selection	TAG_BX_CGACAGGTCCTA	68	T	G	4122	3622	410	T/G	0.8787	SNP
Lib10^4_#2 0_Jm^2 Selection	TAG_BX_CGAGTGTGCCCC	123	T	G	2445	2039	395	T/G	0.8339	SNP
Lib10^4_#2 0_Jm^2 Selection	TAG_BX_GATATTCGTCTC	12	T	G	1270	1189	76	T/G	0.9362	SNP
Lib10^4_#2 0_Jm^2 Selection	TAG_BX_GCATACTGGGTG	123	T	G	1715	1427	276	T/G	0.8321	SNP
Lib10^4_#2 0_Jm^2 Selection	TAG_BX_GCCTTGGACTTA	123	T	G	3364	2836	504	T/G	0.843	SNP
Lib10^4_#2 0_Jm^2 Selection	TAG_BX_GCTCGCGAAGTC	123	T	G	101	24	75	T/G	0.2376	SNP
Lib10^4_#2 0_Jm^2 Selection	TAG_BX_GCTCGCGAAGTC	68	T	G	101	25	75	T/G	0.2475	SNP
Lib10^4_#2 0_Jm^2 Selection	TAG_BX_GCTCGCGAAGTC	134	C	G	101	12	59	C/G	0.1188	SNP
Lib10^4_#2 0_Jm^2 Selection	TAG_BX_GGCCTGGAGCCG	123	T	G	2599	2191	386	T/G	0.843	SNP
Lib10^4_#2 0_Jm^2 Selection	TAG_BX_GGGTTAGCTTGT	123	T	G	117	96	21	T/G	0.8205	SNP
Lib10^4_#2 0_Jm^2 Selection	TAG_BX_TCCTGATCGGGG	68	T	G	1390	1234	129	T/G	0.8878	SNP
Lib10^4_#2 0_Jm^2 Selection	TAG_BX_TCGGCTATGACT	101	C	A	4055	3374	647	C/A	0.8321	SNP
Lib10^4_#2 0_Jm^2 Selection	TAG_BX_TCGTCGTCTGGA	74	A	T	954	808	142	A/T	0.847	SNP
Lib10^4_#2 0_Jm^2 Selection	TAG_BX_TCTTGTCAAGGT	68	T	G	174	33	136	T/G	0.1897	SNP
Lib10^4_#2 0_Jm^2 Selection	TAG_BX_TCTTGTCAAGGT	123	T	G	174	41	131	T/G	0.2356	SNP
Lib10^4_#2 0_Jm^2 Selection	TAG_BX_TCTTTAGTGGGA	85	G	A	272	226	46	G/A	0.8309	SNP
Lib10^4_#2 0_Jm^2 Selection	TAG_BX_TGCGTTGGGCGA	-12	C	G	1984	1923	59	C/G	0.9693	SNP
Lib10^4_#2 0_Jm^2 Selection	TAG_BX_TGTCGCTCCTTA	68	T	G	3288	2882	326	T/G	0.8765	SNP
Lib10^4_#2 0_Jm^2 Selection	TAG_BX_CATTATCACTTG	134	C		3163	2503	563	C/	0.7913	1Del
Lib10^4_#2 0_Jm^2 Selection	TAG_BX_CTTATAATATTG	134	C		1006	783	199	C/	0.7783	1Del
Lib10^4_#2 0_Jm^2 Selection	TAG_BX_GCTCGCGAAGTC	134	C		101	28	59	C/	0.2772	1Del
Lib10^4_#2 0_Jm^2 Selection	TAG_BX_GTTAAGTACGAT	134	C		4260	3443	699	C/	0.8082	1Del
Lib10^4_#2 0_Jm^2 Selection	TAG_BX_TATTGTGGGTAG	134	C		2493	2033	390	C/	0.8155	1Del
Lib10^4_#2 0_Jm^2 Selection	TAG_BX_TCGGTGACCGAA	90	A		1375	1141	216	A/	0.8298	1Del
Lib10^4_#2 0_Jm^2 Selection	TAG_BX_TCTTGTCAAGGT	134	C		174	43	117	C/	0.2471	1Del
Lib10^4_#1 50_Jm^2 Selection	TAG_BX_CGGTATTAATTT	123	TTC	CTT	56	37	8	TTC/CTT	0.6607	Del-In
Lib10^4_#1 50_Jm^2 Selection	TAG_BX_GGATTTTCCCTT	123	TTC	GTT	60	36	14	TTC/GTT	0.6	Del-In
Lib10^4_#1 50_Jm^2 Selection	TAG_BX_GTTTTGTTTGTG	84	GGGAG	AAGAA	84	61	16	GGGAG/AAGAA	0.7262	Del-In
Lib10^4_#1 50_Jm^2 Selection	TAG_BX_AAAGCGTTAGAG	84	GG	AA	106	81	23	GG/AA	0.7642	DNP
Lib10^4_#1 50_Jm^2 Selection	TAG_BX_AAATTTCTTTCG	65	GG	AA	39	30	8	GG/AA	0.7692	DNP
Lib10^4_#1 50_Jm^2 Selection	TAG_BX_AACGGCTCTAGG	130	CC	TT	80	63	11	CC/TT	0.7875	DNP
Lib10^4_#1 50_Jm^2 Selection	TAG_BX_AATGGTTTCGCT	65	GG	AA	58	50	6	GG/AA	0.8621	DNP
Lib10^4_#1 50_Jm^2 Selection	TAG_BX_AATTGGCTTGCC	84	GG	AA	89	73	15	GG/AA	0.8202	DNP
Lib10^4_#1 50_Jm^2 Selection	TAG_BX_ACAGGCTTCCTC	61	GG	AA	49	37	9	GG/AA	0.7551	DNP
Lib10^4_#1 50_Jm^2 Selection	TAG_BX_ACATAACCGGCT	84	GG	AA	42	33	8	GG/AA	0.7857	DNP
Lib10^4_#1 50_Jm^2 Selection	TAG_BX_ACTGTTCTGGCT	130	CC	TT	65	45	15	CC/TT	0.6923	DNP
Lib10^4_#1 50_Jm^2 Selection	TAG_BX_AGAATCTAGTGG	70	CC	TT	51	37	9	CC/TT	0.7255	DNP
Lib10^4_#1 50_Jm^2 Selection	TAG_BX_AGCTCCAGTTTT	61	GG	AA	83	71	9	GG/AA	0.8554	DNP
Lib10^4_#1 50_Jm^2 Selection	TAG_BX_AGCTGTTATCTT	130	CC	TT	114	78	20	CC/TT	0.6842	DNP
Lib10^4_#1 50_Jm^2 Selection	TAG_BX_AGCTTCTGAGTC	61	GG	AA	101	83	14	GG/AA	0.8218	DNP
Lib10^4_#1 50_Jm^2 Selection	TAG_BX_AGGTCTTTAGCT	85	GG	AA	73	66	3	GG/AA	0.9041	DNP
Lib10^4_#1 50_Jm^2 Selection	TAG_BX_AGTTATTCGGGT	61	GG	AA	31	26	4	GG/AA	0.8387	DNP
Lib10^4_#1 50_Jm^2 Selection	TAG_BX_AGTTTCGCTGTT	65	GG	AA	84	63	15	GG/AA	0.75	DNP
Lib10^4_#1 50_Jm^2 Selection	TAG_BX_ATATATGGCATA	65	GG	AA	17	14	2	GG/AA	0.8235	DNP
Lib10^4_#1 50_Jm^2 Selection	TAG_BX_ATATGTGCAACT	130	CC	TT	115	41	66	CC/TT	0.3565	DNP
Lib10^4_#1 50_Jm^2 Selection	TAG_BX_ATATTACTGCTC	85	GG	AA	103	82	15	GG/AA	0.7961	DNP
Lib10^4_#1 50_Jm^2 Selection	TAG_BX_ATATTGGGTTCC	85	GG	AA	72	60	9	GG/AA	0.8333	DNP
Lib10^4_#1 50_Jm^2 Selection	TAG_BX_ATATTTCAATAA	65	GG	AA	18	11	7	GG/AA	0.6111	DNP
Lib10^4_#1 50_Jm^2 Selection	TAG_BX_ATCGACTTGCTT	65	GG	AA	17	2	15	GG/AA	0.1176	DNP
Lib10^4_#1 50_Jm^2 Selection	TAG_BX_ATCGGACATCTT	61	GG	AA	133	29	102	GG/AA	0.218	DNP
Lib10^4_#1 50_Jm^2 Selection	TAG_BX_ATCTGCTGGTGT	61	GG	AA	61	47	10	GG/AA	0.7705	DNP
Lib10^4_#1 50_Jm^2 Selection	TAG_BX_ATCTTTTTGGAC	65	GG	AA	102	82	15	GG/AA	0.8039	DNP
Lib10^4_#1 50_Jm^2 Selection	TAG_BX_ATGTGTGCACCG	66	GG	AA	132	63	65	GG/AA	0.4773	DNP
Lib10^4_#1 50_Jm^2 Selection	TAG_BX_ATTACAGGGCAT	121	GG	AA	87	61	11	GG/AA	0.7011	DNP
Lib10^4_#1 50_Jm^2 Selection	TAG_BX_ATTCTAAATTTT	130	CC	TT	91	66	13	CC/TT	0.7253	DNP
Lib10^4_#1 50_Jm^2 Selection	TAG_BX_ATTGGCTCCCTT	84	GG	AA	92	75	17	GG/AA	0.8152	DNP
Lib10^4_#1 50_Jm^2 Selection	TAG_BX_ATTGTTCGCTGA	64	GG	AA	96	45	49	GG/AA	0.4688	DNP
Lib10^4_#1 50_Jm^2 Selection	TAG_BX_ATTTCCTCATTA	84	GG	AA	59	50	7	GG/AA	0.8475	DNP
Lib10^4_#1 50_Jm^2 Selection	TAG_BX_ATTTGTGATTGT	130	CC	TT	199	137	36	CC/TT	0.6884	DNP
Lib10^4_#1 50_Jm^2 Selection	TAG_BX_ATTTTACGTTAA	64	GG	AA	49	40	7	GG/AA	0.8163	DNP
Lib10^4_#1 50_Jm^2 Selection	TAG_BX_CAATTCCCCAGG	66	GG	AA	70	58	10	GG/AA	0.8286	DNP
Lib10^4_#1 50_Jm^2 Selection	TAG_BX_CACAAATTTCGG	85	GG	AA	252	210	26	GG/AA	0.8333	DNP
Lib10^4_#1 50_Jm^2 Selection	TAG_BX_CACCCTTTGGTC	84	GG	AA	136	49	83	GG/AA	0.3603	DNP
Lib10^4_#1 50_Jm^2 Selection	TAG_BX_CACCGGTCCAAT	66	GG	AA	49	38	8	GG/AA	0.7755	DNP
Lib10^4_#1 50_Jm^2 Selection	TAG_BX_CAGCTGGCACTC	84	GG	AA	48	36	11	GG/AA	0.75	DNP
Lib10^4_#1 50_Jm^2 Selection	TAG_BX_CCACAATAGTTG	130	CC	TT	123	78	24	CC/TT	0.6341	DNP
Lib10^4_#1 50_Jm^2 Selection	TAG_BX_CCAGTACTTGAA	64	GG	AA	20	17	2	GG/AA	0.85	DNP
Lib10^4_#1 50_Jm^2 Selection	TAG_BX_CCCACGGTCATG	65	GG	AA	85	63	16	GG/AA	0.7412	DNP
Lib10^4_#1 50_Jm^2 Selection	TAG_BX_CCCGTAGGGGCA	61	GG	AA	55	42	7	GG/AA	0.7636	DNP
Lib10^4_#1 50_Jm^2 Selection	TAG_BX_CCCTGCCGTTGA	85	GG	AA	104	74	26	GG/AA	0.7115	DNP
Lib10^4_#1 50_Jm^2 Selection	TAG_BX_CCGATATAGCCT	85	GG	AA	51	40	9	GG/AA	0.7843	DNP
Lib10^4_#1 50_Jm^2 Selection	TAG_BX_CCGATTATTCAT	85	GG	AA	40	30	9	GG/AA	0.75	DNP
Lib10^4_#1 50_Jm^2 Selection	TAG_BX_CGAGGGGCGATA	85	GG	AA	145	118	18	GG/AA	0.8138	DNP
Lib10^4_#1 50_Jm^2 Selection	TAG_BX_CGATTTAGAGTG	65	GG	AA	120	99	12	GG/AA	0.825	DNP
Lib10^4_#1 50_Jm^2 Selection	TAG_BX_CGCCACGCTCAT	66	GG	AA	110	85	15	GG/AA	0.7727	DNP
Lib10^4_#1 50_Jm^2 Selection	TAG_BX_CGCGTCAATGAC	65	GG	AA	71	55	13	GG/AA	0.7746	DNP
Lib10^4_#1 50_Jm^2 Selection	TAG_BX_CGCTAATTAGAT	61	GG	AA	117	89	18	GG/AA	0.7607	DNP
Lib10^4_#1 50_Jm^2 Selection	TAG_BX_CGGCGTTGTTTG	84	GG	AA	71	55	13	GG/AA	0.7746	DNP
Lib10^4_#1 50_Jm^2 Selection	TAG_BX_CGGGTAAACTAT	116	TC	AA	88	63	17	TC/AA	0.7159	DNP
Lib10^4_#1 50_Jm^2 Selection	TAG_BX_CGTGGCAATGTG	61	GG	AA	69	50	15	GG/AA	0.7246	DNP
Lib10^4_#1 50_Jm^2 Selection	TAG_BX_CTACCGAGGTTT	84	GG	AA	52	40	11	GG/AA	0.7692	DNP
Lib10^4_#1 50_Jm^2 Selection	TAG_BX_CTCGCTCGTAAA	130	CC	TT	84	58	10	CC/TT	0.6905	DNP
Lib10^4_#1 50_Jm^2 Selection	TAG_BX_CTCTCGTTGATC	84	GG	AA	154	118	33	GG/AA	0.7662	DNP
Lib10^4_#1 50_Jm^2 Selection	TAG_BX_CTCTCTTGTCCC	85	GG	AA	117	82	24	GG/AA	0.7009	DNP
Lib10^4_#1 50_Jm^2 Selection	TAG_BX_CTGGTGCGGTTA	85	GG	AA	42	30	9	GG/AA	0.7143	DNP
Lib10^4_#1 50_Jm^2 Selection	TAG_BX_CTGTAGTTACCG	84	GG	AA	109	83	26	GG/AA	0.7615	DNP
Lib10^4_#1 50_Jm^2 Selection	TAG_BX_CTTCCATGGGTT	65	GG	AA	71	56	9	GG/AA	0.7887	DNP
Lib10^4_#1 50_Jm^2 Selection	TAG_BX_CTTCGTCAGTCT	65	GG	AA	69	53	11	GG/AA	0.7681	DNP
Lib10^4_#1 50_Jm^2 Selection	TAG_BX_CTTGTATCACTA	85	GG	AA	91	76	10	GG/AA	0.8352	DNP
Lib10^4_#1 50_Jm^2 Selection	TAG_BX_CTTGTCGTCAGC	65	GG	AA	237	136	85	GG/AA	0.5738	DNP
Lib10^4_#1 50_Jm^2 Selection	TAG_BX_GAAAGTAAGACC	65	GG	AA	75	64	6	GG/AA	0.8533	DNP
Lib10^4_#1 50_Jm^2 Selection	TAG_BX_GAACTATTTATC	70	CC	TT	52	39	10	CC/TT	0.75	DNP
Lib10^4_#1 50_Jm^2 Selection	TAG_BX_GAAGGAGGGGTT	66	GG	AA	66	53	10	GG/AA	0.803	DNP
Lib10^4_#1 50_Jm^2 Selection	TAG_BX_GAAGTCACATTT	65	GG	AA	58	44	11	GG/AA	0.7586	DNP
Lib10^4_#1 50_Jm^2 Selection	TAG_BX_GACGGTCTGGAT	121	GG	AA	67	45	15	GG/AA	0.6716	DNP
Lib10^4_#1 50_Jm^2 Selection	TAG_BX_GAGCGCCTTGCA	85	GG	AA	96	78	11	GG/AA	0.8125	DNP
Lib10^4_#1 50_Jm^2 Selection	TAG_BX_GAGCTATTCCCA	65	GG	AA	65	52	9	GG/AA	0.8	DNP
Lib10^4_#1 50_Jm^2 Selection	TAG_BX_GAGGTATGGTTT	121	GG	AA	93	63	17	GG/AA	0.6774	DNP
Lib10^4_#1 50_Jm^2 Selection	TAG_BX_GATATTGCGAGG	121	GG	AA	79	50	17	GG/AA	0.6329	DNP
Lib10^4_#1 50_Jm^2 Selection	TAG_BX_GATCAGGTGCTT	61	GG	AA	41	33	7	GG/AA	0.8049	DNP
Lib10^4_#1 50_Jm^2 Selection	TAG_BX_GATGGATTTTTG	85	GG	AA	59	46	10	GG/AA	0.7797	DNP
Lib10^4_#1 50_Jm^2 Selection	TAG_BX_GATTCCATGTTT	65	GG	AA	130	106	13	GG/AA	0.8154	DNP
Lib10^4_#1 50_Jm^2 Selection	TAG_BX_GCACACTTCCAG	66	GG	AA	131	108	15	GG/AA	0.8244	DNP
Lib10^4_#1 50_Jm^2 Selection	TAG_BX_GCACTTTCAGAT	65	GG	AA	37	32	2	GG/AA	0.8649	DNP
Lib10^4_#1 50_Jm^2 Selection	TAG_BX_GCCTGGTTTCGG	130	CC	TT	46	38	4	CC/TT	0.8261	DNP
Lib10^4_#1 50_Jm^2 Selection	TAG_BX_GCGGGGGAAATG	130	CC	TT	238	160	54	CC/TT	0.6723	DNP
Lib10^4_#1 50_Jm^2 Selection	TAG_BX_GCGTCGTTAGCT	130	CC	TT	97	63	15	CC/TT	0.6495	DNP
Lib10^4_#1 50_Jm^2 Selection	TAG_BX_GCTAACGCGCTT	65	GG	AA	38	30	5	GG/AA	0.7895	DNP
Lib10^4_#1 50_Jm^2 Selection	TAG_BX_GCTAGAGTCGTA	121	GG	AA	100	69	19	GG/AA	0.69	DNP
Lib10^4_#1 50_Jm^2 Selection	TAG_BX_GCTTAAAGACAA	61	GG	AA	78	66	10	GG/AA	0.8462	DNP
Lib10^4_#1 50_Jm^2 Selection	TAG_BX_GGACAGTACGTT	121	GG	AA	45	29	9	GG/AA	0.6444	DNP
Lib10^4_#1 50_Jm^2 Selection	TAG_BX_GGACCATTCTGG	65	GG	AA	109	86	13	GG/AA	0.789	DNP
Lib10^4_#1 50_Jm^2 Selection	TAG_BX_GGCGCTCATATG	121	GG	AA	111	75	15	GG/AA	0.6757	DNP
Lib10^4_#1 50_Jm^2 Selection	TAG_BX_GGCGGGCTCATG	121	GG	AA	79	56	10	GG/AA	0.7089	DNP
Lib10^4_#1 50_Jm^2 Selection	TAG_BX_GGCTGTCATCGG	121	GG	AA	66	51	6	GG/AA	0.7727	DNP
Lib10^4_#1 50_Jm^2 Selection	TAG_BX_GGCTTACAGTTC	77	GG	AA	88	68	15	GG/AA	0.7727	DNP
Lib10^4_#1 50_Jm^2 Selection	TAG_BX_GGGCACAGTACT	85	GG	AA	74	55	15	GG/AA	0.7432	DNP
Lib10^4_#1 50_Jm^2 Selection	TAG_BX_GGGCCTGAATGG	130	CC	TT	46	28	11	CC/TT	0.6087	DNP
Lib10^4_#1 50_Jm^2 Selection	TAG_BX_GGGCTTTCGGTT	68	TT	CC	67	9	11	TT/CC	0.1343	DNP
Lib10^4_#1 50_Jm^2 Selection	TAG_BX_GGGGCTAGGCGC	66	GG	AA	82	26	55	GG/AA	0.3171	DNP
Lib10^4_#1 50_Jm^2 Selection	TAG_BX_GGTAAGAAGCTA	66	GG	AA	144	111	23	GG/AA	0.7708	DNP
Lib10^4_#1 50_Jm^2 Selection	TAG_BX_GGTAGGTTTCAG	84	GG	AA	42	34	8	GG/AA	0.8095	DNP
Lib10^4_#1 50_Jm^2 Selection	TAG_BX_GGTGGGTATTAA	77	GG	AA	130	81	46	GG/AA	0.6231	DNP
Lib10^4_#1 50_Jm^2 Selection	TAG_BX_GGTGGTCATTGC	84	GG	AA	41	32	8	GG/AA	0.7805	DNP
Lib10^4_#1 50_Jm^2 Selection	TAG_BX_GGTTAGATGATT	130	CC	TT	45	35	7	CC/TT	0.7778	DNP
Lib10^4_#1 50_Jm^2 Selection	TAG_BX_GGTTTGACTTCT	66	GG	AA	165	101	49	GG/AA	0.6121	DNP
Lib10^4_#1 50_Jm^2 Selection	TAG_BX_GGTTTGTTTTGG	66	GG	AA	127	106	16	GG/AA	0.8346	DNP
Lib10^4_#1 50_Jm^2 Selection	TAG_BX_GTAAGAGTTTTA	130	CC	TT	37	22	6	CC/TT	0.5946	DNP
Lib10^4_#1 50_Jm^2 Selection	TAG_BX_GTAAGATCTTGT	65	GG	AA	105	79	20	GG/AA	0.7524	DNP
Lib10^4_#1 50_Jm^2 Selection	TAG_BX_GTACGCCGGGTT	130	CC	TT	65	51	7	CC/TT	0.7846	DNP
Lib10^4_#1 50_Jm^2 Selection	TAG_BX_GTACTACCTGTA	77	GG	AA	74	57	15	GG/AA	0.7703	DNP
Lib10^4_#1 50_Jm^2 Selection	TAG_BX_GTATGTGTGTTT	65	GG	AA	191	149	35	GG/AA	0.7801	DNP
Lib10^4_#1 50_Jm^2 Selection	TAG_BX_GTATGTTCTAGC	130	CC	TT	90	61	15	CC/TT	0.6778	DNP
Lib10^4_#1 50_Jm^2 Selection	TAG_BX_GTCATGGTTCTC	85	GG	AA	68	55	11	GG/AA	0.8088	DNP
Lib10^4_#1 50_Jm^2 Selection	TAG_BX_GTCGCAATCGGT	85	GG	AA	53	43	8	GG/AA	0.8113	DNP
Lib10^4_#1 50_Jm^2 Selection	TAG_BX_GTCGGTACGTGT	85	GG	AA	36	30	5	GG/AA	0.8333	DNP
Lib10^4_#1 50_Jm^2 Selection	TAG_BX_GTCTCGTCTAGG	130	CC	TT	38	29	3	CC/TT	0.7632	DNP
Lib10^4_#1 50_Jm^2 Selection	TAG_BX_GTGCGGTTCTCC	65	GG	AA	68	50	15	GG/AA	0.7353	DNP
Lib10^4_#1 50_Jm^2 Selection	TAG_BX_GTGCTCCCAACA	121	GG	AA	30	18	8	GG/AA	0.6	DNP
Lib10^4_#1 50_Jm^2 Selection	TAG_BX_GTGGATTTTTTT	65	GG	AA	111	89	19	GG/AA	0.8018	DNP
Lib10^4_#1 50_Jm^2 Selection	TAG_BX_GTGGCCTGTTGC	77	GG	AA	113	90	17	GG/AA	0.7965	DNP
Lib10^4_#1 50_Jm^2 Selection	TAG_BX_GTGGGATAACCG	121	GG	AA	225	39	176	GG/AA	0.1733	DNP
Lib10^4_#1 50_Jm^2 Selection	TAG_BX_GTTACTGTGCTT	130	CC	TT	84	53	12	CC/TT	0.631	DNP
Lib10^4_#1 50_Jm^2 Selection	TAG_BX_GTTCTTGGTGGT	61	GG	AA	85	68	12	GG/AA	0.8	DNP
Lib10^4_#1 50_Jm^2 Selection	TAG_BX_GTTTAAGAGGTG	64	GG	AA	42	33	7	GG/AA	0.7857	DNP
Lib10^4_#1 50_Jm^2 Selection	TAG_BX_TACTTCTGATGT	84	GG	AA	160	122	30	GG/AA	0.7625	DNP
Lib10^4_#1 50_Jm^2 Selection	TAG_BX_TACTTTTTGAGT	121	GG	AA	135	80	32	GG/AA	0.5926	DNP
Lib10^4_#1 50_Jm^2 Selection	TAG_BX_TAGAGACGTATG	85	GG	AA	213	170	33	GG/AA	0.7981	DNP
Lib10^4_#1 50_Jm^2 Selection	TAG_BX_TAGGGAAGTGTT	65	GG	AA	155	112	31	GG/AA	0.7226	DNP
Lib10^4_#1 50_Jm^2 Selection	TAG_BX_TAGGTTACTAAT	61	GG	AA	60	49	8	GG/AA	0.8167	DNP
Lib10^4_#1 50_Jm^2 Selection	TAG_BX_TAGTTTTCAGGT	65	GG	AA	73	62	7	GG/AA	0.8493	DNP
Lib10^4_#1 50_Jm^2 Selection	TAG_BX_TATGACTCAGGG	121	GG	AA	134	84	24	GG/AA	0.6269	DNP
Lib10^4_#1 50_Jm^2 Selection	TAG_BX_TATGAGAGAGAT	121	GG	AA	141	69	56	GG/AA	0.4894	DNP
Lib10^4_#1 50_Jm^2 Selection	TAG_BX_TATTGCGAATTG	121	GG	AA	60	40	13	GG/AA	0.6667	DNP
Lib10^4_#1 50_Jm^2 Selection	TAG_BX_TCAATAGGGAAT	130	CC	TT	85	57	16	CC/TT	0.6706	DNP
Lib10^4_#1 50_Jm^2 Selection	TAG_BX_TCACCGAGTTTG	85	GG	AA	62	48	13	GG/AA	0.7742	DNP
Lib10^4_#1 50_Jm^2 Selection	TAG_BX_TCACGGCTCTAT	121	GG	AA	230	157	41	GG/AA	0.6826	DNP
Lib10^4_#1 50_Jm^2 Selection	TAG_BX_TCCGCCTGGCCC	85	GG	AA	41	32	8	GG/AA	0.7805	DNP
Lib10^4_#1 50_Jm^2 Selection	TAG_BX_TCCGGCGATCTG	130	CC	TT	165	122	21	CC/TT	0.7394	DNP
Lib10^4_#1 50_Jm^2 Selection	TAG_BX_TCCTTAAACTGG	84	GG	AA	45	37	8	GG/AA	0.8222	DNP
Lib10^4_#1 50_Jm^2 Selection	TAG_BX_TCCTTACATACG	65	GG	AA	59	46	11	GG/AA	0.7797	DNP
Lib10^4_#1 50_Jm^2 Selection	TAG_BX_TCCTTGCAGCCT	81	AA	CT	24	18	6	AA/CT	0.75	DNP
Lib10^4_#1 50_Jm^2 Selection	TAG_BX_TCGAGGCCGTCA	85	GG	AA	42	31	9	GG/AA	0.7381	DNP
Lib10^4_#1 50_Jm^2 Selection	TAG_BX_TCGCATGGGATG	85	GG	AA	76	35	36	GG/AA	0.4605	DNP
Lib10^4_#1 50_Jm^2 Selection	TAG_BX_TCTGTCCCGGTT	65	GG	AA	157	130	16	GG/AA	0.828	DNP
Lib10^4_#1 50_Jm^2 Selection	TAG_BX_TCTTATATAGGG	85	GG	AA	22	15	5	GG/AA	0.6818	DNP
Lib10^4_#1 50_Jm^2 Selection	TAG_BX_TCTTATCCGAAC	121	GG	AA	87	55	21	GG/AA	0.6322	DNP
Lib10^4_#1 50_Jm^2 Selection	TAG_BX_TCTTTTACGGGA	70	CC	TT	23	14	6	CC/TT	0.6087	DNP
Lib10^4_#1 50_Jm^2 Selection	TAG_BX_TGATCTTCGGGG	65	GG	AA	79	61	14	GG/AA	0.7722	DNP
Lib10^4_#1 50_Jm^2 Selection	TAG_BX_TGATTCCCTCCG	130	CC	TT	110	75	19	CC/TT	0.6818	DNP
Lib10^4_#1 50_Jm^2 Selection	TAG_BX_TGCACGACGTAT	121	GG	AA	235	147	49	GG/AA	0.6255	DNP
Lib10^4_#1 50_Jm^2 Selection	TAG_BX_TGGCGAATATGG	84	GG	AA	47	35	10	GG/AA	0.7447	DNP
Lib10^4_#1 50_Jm^2 Selection	TAG_BX_TGGCTTAAACTG	65	GG	AA	75	56	11	GG/AA	0.7467	DNP
Lib10^4_#1 50_Jm^2 Selection	TAG_BX_TGGGGCCGACGA	65	GG	AA	117	95	15	GG/AA	0.812	DNP
Lib10^4_#1 50_Jm^2 Selection	TAG_BX_TGGTTGTATATC	85	GG	AA	63	46	13	GG/AA	0.7302	DNP
Lib10^4_#1 50_Jm^2 Selection	TAG_BX_TGTCACGTCCGG	64	GG	AA	45	36	6	GG/AA	0.8	DNP
Lib10^4_#1 50_Jm^2 Selection	TAG_BX_TGTCGATGAGTT	61	GG	AA	78	55	14	GG/AA	0.7051	DNP
Lib10^4_#1 50_Jm^2 Selection	TAG_BX_TGTTCGAGTTGG	121	GG	AA	47	30	10	GG/AA	0.6383	DNP
Lib10^4_#1 50_Jm^2 Selection	TAG_BX_TGTTGCCATCCG	130	CC	TT	57	39	12	CC/TT	0.6842	DNP
Lib10^4_#1 50_Jm^2 Selection	TAG_BX_TGTTGTTATTTG	65	GG	AA	73	66	4	GG/AA	0.9041	DNP
Lib10^4_#1 50_Jm^2 Selection	TAG_BX_TGTTTATCTATG	130	CC	TT	88	65	12	CC/TT	0.7386	DNP
Lib10^4_#1 50_Jm^2 Selection	TAG_BX_TTATCACAGTGT	65	GG	AA	105	45	59	GG/AA	0.4286	DNP
Lib10^4_#1 50_Jm^2 Selection	TAG_BX_TTCAATACGCTC	65	GG	AA	45	36	6	GG/AA	0.8	DNP
Lib10^4_#1 50_Jm^2 Selection	TAG_BX_TTGACCCGGCGG	61	GG	AA	113	85	19	GG/AA	0.7522	DNP
Lib10^4_#1 50_Jm^2 Selection	TAG_BX_TTGCCGTGCTAT	61	GG	AA	54	45	8	GG/AA	0.8333	DNP
Lib10^4_#1 50_Jm^2 Selection	TAG_BX_TTGGACGCTTGA	85	GG	AA	88	66	17	GG/AA	0.75	DNP
Lib10^4_#1 50_Jm^2 Selection	TAG_BX_TTGGCCGCGGGG	130	CC	TT	171	110	31	CC/TT	0.6433	DNP
Lib10^4_#1 50_Jm^2 Selection	TAG_BX_TTGGGGATTTTT	84	GG	AA	41	35	3	GG/AA	0.8537	DNP
Lib10^4_#1 50_Jm^2 Selection	TAG_BX_TTGGTAGCCAGG	77	GG	AA	58	48	7	GG/AA	0.8276	DNP
Lib10^4_#1 50_Jm^2 Selection	TAG_BX_TTGGTTATGTAT	84	GG	AA	168	53	114	GG/AA	0.3155	DNP
Lib10^4_#1 50_Jm^2 Selection	TAG_BX_TTGTCTATGACC	130	CC	TT	149	107	23	CC/TT	0.7181	DNP
Lib10^4_#1 50_Jm^2 Selection	TAG_BX_TTGTTATTGGCT	65	GG	AA	108	88	13	GG/AA	0.8148	DNP
Lib10^4_#1 50_Jm^2 Selection	TAG_BX_TTTACAACATTG	130	CC	TT	100	65	21	CC/TT	0.65	DNP
Lib10^4_#1 50_Jm^2 Selection	TAG_BX_TTTACAATATGG	130	CC	TT	262	177	54	CC/TT	0.6756	DNP
Lib10^4_#1 50_Jm^2 Selection	TAG_BX_TTTAGCAGAGTA	61	GG	AA	68	55	12	GG/AA	0.8088	DNP
Lib10^4_#1 50_Jm^2 Selection	TAG_BX_TTTCGTTTGAGA	77	GG	AA	19	14	4	GG/AA	0.7368	DNP
Lib10^4_#1 50_Jm^2 Selection	TAG_BX_TTTGTCCGGGGC	121	GG	AA	79	53	16	GG/AA	0.6709	DNP
Lib10^4_#1 50_Jm^2 Selection	TAG_BX_TTTTAGAACATT	121	GG	AA	90	59	18	GG/AA	0.6556	DNP
Lib10^4_#1 50_Jm^2 Selection	TAG_BX_TTTTATCTTGAT	130	CC	TT	81	61	8	CC/TT	0.7531	DNP
Lib10^4_#1 50_Jm^2 Selection	TAG_BX_TTTTCACTCCTA	85	GG	AA	77	59	14	GG/AA	0.7662	DNP
Lib10^4_#1 50_Jm^2 Selection	TAG_BX_TTTTGAACCTAA	64	GG	AA	123	102	18	GG/AA	0.8293	DNP
Lib10^4_#1 50_Jm^2 Selection	TAG_BX_TTTTTATTTCTT	130	CC	TT	50	31	7	CC/TT	0.62	DNP
Lib10^4_#1 50_Jm^2 Selection	TAG_BX_CATTAGTAGATC	129	T	CC	26	20	5	T/CC	0.7692	Ins
Lib10^4_#1 50_Jm^2 Selection	TAG_BX_AAAAGCCGAGAG	134	C	G	152	67	84	C/G	0.4408	SNP
Lib10^4_#1 50_Jm^2 Selection	TAG_BX_AAAAGCCGAGAG	118	G	A	152	51	98	G/A	0.3355	SNP
Lib10^4_#1 50_Jm^2 Selection	TAG_BX_AAAGTGGATCGT	5	G	A	20	20	0	G/A	1	SNP
Lib10^4_#1 50_Jm^2 Selection	TAG_BX_AAATGCCCGTTT	121	G	A	59	51	8	G/A	0.8644	SNP
Lib10^4_#1 50_Jm^2 Selection	TAG_BX_AACCCTGACTTT	85	G	A	17	2	15	G/A	0.1176	SNP
Lib10^4_#1 50_Jm^2 Selection	TAG_BX_AACCCTGACTTT	121	G	A	17	2	15	G/A	0.1176	SNP
Lib10^4_#1 50_Jm^2 Selection	TAG_BX_AACGGGTGTGTA	130	C	T	87	70	15	C/T	0.8046	SNP
Lib10^4_#1 50_Jm^2 Selection	TAG_BX_AACGGTAGTAGC	130	C	T	91	66	21	C/T	0.7253	SNP
Lib10^4_#1 50_Jm^2 Selection	TAG_BX_AACGTCGTGGCG	118	G	A	41	29	12	G/A	0.7073	SNP
Lib10^4_#1 50_Jm^2 Selection	TAG_BX_AACTCATGACCG	5	G	A	17	17	0	G/A	1	SNP
Lib10^4_#1 50_Jm^2 Selection	TAG_BX_AACTTGATTTGT	130	C	T	37	30	6	C/T	0.8108	SNP
Lib10^4_#1 50_Jm^2 Selection	TAG_BX_AAGACGGGATGT	121	G	A	60	49	11	G/A	0.8167	SNP
Lib10^4_#1 50_Jm^2 Selection	TAG_BX_AAGCATTGTTAG	118	G	A	75	65	10	G/A	0.8667	SNP
Lib10^4_#1 50_Jm^2 Selection	TAG_BX_AAGCCGTTCACG	118	G	A	36	27	8	G/A	0.75	SNP
Lib10^4_#1 50_Jm^2 Selection	TAG_BX_AAGTGTTCAGGT	118	G	A	82	16	66	G/A	0.1951	SNP
Lib10^4_#1 50_Jm^2 Selection	TAG_BX_AAGTGTTCAGGT	121	G	A	82	51	31	G/A	0.622	SNP
Lib10^4_#1 50_Jm^2 Selection	TAG_BX_AATAATGACTTT	95	C	G	74	52	22	C/G	0.7027	SNP
Lib10^4_#1 50_Jm^2 Selection	TAG_BX_AATAGCCTCTTT	5	G	A	24	22	2	G/A	0.9167	SNP
Lib10^4_#1 50_Jm^2 Selection	TAG_BX_AATATGCTCTCT	118	G	A	58	48	10	G/A	0.8276	SNP
Lib10^4_#1 50_Jm^2 Selection	TAG_BX_AATCGTATCGTC	131	C	T	77	55	22	C/T	0.7143	SNP
Lib10^4_#1 50_Jm^2 Selection	TAG_BX_AATCTACGCGAC	118	G	A	39	34	5	G/A	0.8718	SNP
Lib10^4_#1 50_Jm^2 Selection	TAG_BX_AATGACGAAATA	131	C	T	111	24	85	C/T	0.2162	SNP
Lib10^4_#1 50_Jm^2 Selection	TAG_BX_AATGACGAAATA	121	G	A	111	63	48	G/A	0.5676	SNP
Lib10^4_#1 50_Jm^2 Selection	TAG_BX_AATGTGTCACGC	131	C	T	22	19	3	C/T	0.8636	SNP
Lib10^4_#1 50_Jm^2 Selection	TAG_BX_AATTGGAGTTGC	95	C	G	38	28	10	C/G	0.7368	SNP
Lib10^4_#1 50_Jm^2 Selection	TAG_BX_ACAACCTATGAT	131	C	T	26	21	5	C/T	0.8077	SNP
Lib10^4_#1 50_Jm^2 Selection	TAG_BX_ACAACCTCATTT	121	G	A	43	35	8	G/A	0.814	SNP
Lib10^4_#1 50_Jm^2 Selection	TAG_BX_ACAGGGCTCATG	118	G	A	154	118	33	G/A	0.7662	SNP
Lib10^4_#1 50_Jm^2 Selection	TAG_BX_ACATAACTTGAC	118	G	A	34	27	7	G/A	0.7941	SNP
Lib10^4_#1 50_Jm^2 Selection	TAG_BX_ACATACTAGGCT	131	C	T	64	47	13	C/T	0.7344	SNP
Lib10^4_#1 50_Jm^2 Selection	TAG_BX_ACATCGTAGGGT	85	G	A	63	50	10	G/A	0.7937	SNP
Lib10^4_#1 50_Jm^2 Selection	TAG_BX_ACATGTAGGGTT	118	G	A	62	49	12	G/A	0.7903	SNP
Lib10^4_#1 50_Jm^2 Selection	TAG_BX_ACATGTTGCGTT	118	G	A	31	17	12	G/A	0.5484	SNP
Lib10^4_#1 50_Jm^2 Selection	TAG_BX_ACATTAGCGCAG	5	G	A	30	26	4	G/A	0.8667	SNP
Lib10^4_#1 50_Jm^2 Selection	TAG_BX_ACATTTGTCTTA	118	G	A	38	33	4	G/A	0.8684	SNP
Lib10^4_#1 50_Jm^2 Selection	TAG_BX_ACCAACATCGTC	121	G	A	98	77	20	G/A	0.7857	SNP
Lib10^4_#1 50_Jm^2 Selection	TAG_BX_ACCATTTATCGC	85	G	A	138	115	22	G/A	0.8333	SNP
Lib10^4_#1 50_Jm^2 Selection	TAG_BX_ACCCAAGTCAGC	85	G	A	76	63	11	G/A	0.8289	SNP
Lib10^4_#1 50_Jm^2 Selection	TAG_BX_ACCGTCGTTACG	130	C	T	62	44	15	C/T	0.7097	SNP
Lib10^4_#1 50_Jm^2 Selection	TAG_BX_ACCTGGGTATAA	121	G	A	64	39	25	G/A	0.6094	SNP
Lib10^4_#1 50_Jm^2 Selection	TAG_BX_ACCTGGGTATAA	131	C	T	64	15	48	C/T	0.2344	SNP
Lib10^4_#1 50_Jm^2 Selection	TAG_BX_ACGAACGATCGT	5	G	A	22	22	0	G/A	1	SNP
Lib10^4_#1 50_Jm^2 Selection	TAG_BX_ACGAGTTCTCTG	121	G	A	52	45	7	G/A	0.8654	SNP
Lib10^4_#1 50_Jm^2 Selection	TAG_BX_ACGATTTTTAAA	85	G	A	90	71	17	G/A	0.7889	SNP
Lib10^4_#1 50_Jm^2 Selection	TAG_BX_ACGCCACCTGCT	118	G	A	21	15	6	G/A	0.7143	SNP
Lib10^4_#1 50_Jm^2 Selection	TAG_BX_ACGCGGGACCGG	5	G	A	27	25	2	G/A	0.9259	SNP
Lib10^4_#1 50_Jm^2 Selection	TAG_BX_ACGGGCGTTTTT	85	G	A	46	36	8	G/A	0.7826	SNP
Lib10^4_#1 50_Jm^2 Selection	TAG_BX_ACGGTTTGTCAT	85	G	A	16	3	13	G/A	0.1875	SNP
Lib10^4_#1 50_Jm^2 Selection	TAG_BX_ACGGTTTGTCAT	5	G	A	16	13	3	G/A	0.8125	SNP
Lib10^4_#1 50_Jm^2 Selection	TAG_BX_ACGTAACACACT	5	G	A	28	24	4	G/A	0.8571	SNP
Lib10^4_#1 50_Jm^2 Selection	TAG_BX_ACGTTGCAGCGT	130	C	T	54	45	8	C/T	0.8333	SNP
Lib10^4_#1 50_Jm^2 Selection	TAG_BX_ACGTTTCTCCAG	122	G	A	65	55	10	G/A	0.8462	SNP
Lib10^4_#1 50_Jm^2 Selection	TAG_BX_ACTAAGTTGTCT	5	G	A	88	14	73	G/A	0.1591	SNP
Lib10^4_#1 50_Jm^2 Selection	TAG_BX_ACTAAGTTGTCT	118	G	A	88	59	28	G/A	0.6705	SNP
Lib10^4_#1 50_Jm^2 Selection	TAG_BX_ACTACCTTTCGG	122	G	A	79	60	19	G/A	0.7595	SNP
Lib10^4_#1 50_Jm^2 Selection	TAG_BX_ACTCGCGTGTTT	121	G	A	74	61	12	G/A	0.8243	SNP
Lib10^4_#1 50_Jm^2 Selection	TAG_BX_ACTCTCTCTGTT	5	G	A	22	21	1	G/A	0.9545	SNP
Lib10^4_#1 50_Jm^2 Selection	TAG_BX_ACTGTCGGTTGT	130	C	T	94	70	18	C/T	0.7447	SNP
Lib10^4_#1 50_Jm^2 Selection	TAG_BX_ACTTATTTCCGG	130	C	T	53	40	13	C/T	0.7547	SNP
Lib10^4_#1 50_Jm^2 Selection	TAG_BX_AGAAGGTGTCGC	5	G	A	25	24	1	G/A	0.96	SNP
Lib10^4_#1 50_Jm^2 Selection	TAG_BX_AGACAAGGTCTT	5	G	A	21	19	2	G/A	0.9048	SNP
Lib10^4_#1 50_Jm^2 Selection	TAG_BX_AGACAAGGTCTT	118	G	A	21	3	18	G/A	0.1429	SNP
Lib10^4_#1 50_Jm^2 Selection	TAG_BX_AGATCAAAGCCT	85	G	A	71	58	11	G/A	0.8169	SNP
Lib10^4_#1 50_Jm^2 Selection	TAG_BX_AGATCCCATTGT	85	G	A	92	80	11	G/A	0.8696	SNP
Lib10^4_#1 50_Jm^2 Selection	TAG_BX_AGATCTTGTTCA	5	G	A	28	23	5	G/A	0.8214	SNP
Lib10^4_#1 50_Jm^2 Selection	TAG_BX_AGATCTTGTTCA	69	T	C	28	3	25	T/C	0.1071	SNP
Lib10^4_#1 50_Jm^2 Selection	TAG_BX_AGATTCCACGGG	85	G	A	32	27	5	G/A	0.8438	SNP
Lib10^4_#1 50_Jm^2 Selection	TAG_BX_AGCAGTTTCATA	121	G	A	79	63	16	G/A	0.7975	SNP
Lib10^4_#1 50_Jm^2 Selection	TAG_BX_AGCCTATGAGTT	85	G	A	58	46	12	G/A	0.7931	SNP
Lib10^4_#1 50_Jm^2 Selection	TAG_BX_AGCGAGGGTTGG	118	G	A	91	73	17	G/A	0.8022	SNP
Lib10^4_#1 50_Jm^2 Selection	TAG_BX_AGCGTCAAACGC	95	C	G	40	35	5	C/G	0.875	SNP
Lib10^4_#1 50_Jm^2 Selection	TAG_BX_AGCGTTGGTGGG	85	G	A	89	76	12	G/A	0.8539	SNP
Lib10^4_#1 50_Jm^2 Selection	TAG_BX_AGCTGAGGATTA	131	C	T	111	85	24	C/T	0.7658	SNP
Lib10^4_#1 50_Jm^2 Selection	TAG_BX_AGCTGAGGATTA	136	C	T	111	80	30	C/T	0.7207	SNP
Lib10^4_#1 50_Jm^2 Selection	TAG_BX_AGCTGTTATCTT	130	C	T	114	16	20	C/T	0.1404	SNP
Lib10^4_#1 50_Jm^2 Selection	TAG_BX_AGGATTATGCAC	131	C	T	46	36	9	C/T	0.7826	SNP
Lib10^4_#1 50_Jm^2 Selection	TAG_BX_AGGCTGCCACAT	130	C	T	32	19	13	C/T	0.5938	SNP
Lib10^4_#1 50_Jm^2 Selection	TAG_BX_AGGCTGCCACAT	121	G	A	32	5	27	G/A	0.1562	SNP
Lib10^4_#1 50_Jm^2 Selection	TAG_BX_AGGGCCGGGTTA	122	G	A	117	86	29	G/A	0.735	SNP
Lib10^4_#1 50_Jm^2 Selection	TAG_BX_AGGGGCCGTGGA	118	G	A	74	58	15	G/A	0.7838	SNP
Lib10^4_#1 50_Jm^2 Selection	TAG_BX_AGGGTTAATCGA	85	G	A	65	57	8	G/A	0.8769	SNP
Lib10^4_#1 50_Jm^2 Selection	TAG_BX_AGGGTTGCCGCG	5	G	A	26	25	1	G/A	0.9615	SNP
Lib10^4_#1 50_Jm^2 Selection	TAG_BX_AGGGTTTTGCGA	5	G	A	29	27	2	G/A	0.931	SNP
Lib10^4_#1 50_Jm^2 Selection	TAG_BX_AGGGTTTTGCGA	130	C	T	29	6	23	C/T	0.2069	SNP
Lib10^4_#1 50_Jm^2 Selection	TAG_BX_AGGGTTTTGCGA	69	T	C	29	3	25	T/C	0.1034	SNP
Lib10^4_#1 50_Jm^2 Selection	TAG_BX_AGGTAGTTGCTT	118	G	A	87	69	18	G/A	0.7931	SNP
Lib10^4_#1 50_Jm^2 Selection	TAG_BX_AGGTTGTGCAAT	130	C	T	42	31	10	C/T	0.7381	SNP
Lib10^4_#1 50_Jm^2 Selection	TAG_BX_AGTAATGCAGGT	5	G	A	22	21	1	G/A	0.9545	SNP
Lib10^4_#1 50_Jm^2 Selection	TAG_BX_AGTATGAGATTA	130	C	T	93	69	23	C/T	0.7419	SNP
Lib10^4_#1 50_Jm^2 Selection	TAG_BX_AGTGAGTTGCAT	122	G	A	143	114	29	G/A	0.7972	SNP
Lib10^4_#1 50_Jm^2 Selection	TAG_BX_AGTTCGGTTTTT	121	G	A	87	80	7	G/A	0.9195	SNP
Lib10^4_#1 50_Jm^2 Selection	TAG_BX_AGTTGTTTTGTT	95	C	G	67	55	12	C/G	0.8209	SNP
Lib10^4_#1 50_Jm^2 Selection	TAG_BX_AGTTTCGCACTC	121	G	A	131	105	25	G/A	0.8015	SNP
Lib10^4_#1 50_Jm^2 Selection	TAG_BX_AGTTTGGAGCGT	118	G	A	67	53	13	G/A	0.791	SNP
Lib10^4_#1 50_Jm^2 Selection	TAG_BX_AGTTTTCTTTAT	118	G	A	36	32	4	G/A	0.8889	SNP
Lib10^4_#1 50_Jm^2 Selection	TAG_BX_AGTTTTGAGATA	85	G	A	31	24	6	G/A	0.7742	SNP
Lib10^4_#1 50_Jm^2 Selection	TAG_BX_ATAAGGTACTCC	118	G	A	55	48	7	G/A	0.8727	SNP
Lib10^4_#1 50_Jm^2 Selection	TAG_BX_ATACGAGGGTCG	5	G	A	15	13	2	G/A	0.8667	SNP
Lib10^4_#1 50_Jm^2 Selection	TAG_BX_ATACTTAGCTGG	85	G	A	93	77	13	G/A	0.828	SNP
Lib10^4_#1 50_Jm^2 Selection	TAG_BX_ATACTTCGTTGT	-12	C	G	14	14	0	C/G	1	SNP
Lib10^4_#1 50_Jm^2 Selection	TAG_BX_ATAGAGCTGCCG	5	G	A	27	25	2	G/A	0.9259	SNP
Lib10^4_#1 50_Jm^2 Selection	TAG_BX_ATAGCGTGGGTC	5	G	A	18	15	3	G/A	0.8333	SNP
Lib10^4_#1 50_Jm^2 Selection	TAG_BX_ATAGGAAGTTTC	5	G	A	18	15	3	G/A	0.8333	SNP
Lib10^4_#1 50_Jm^2 Selection	TAG_BX_ATAGGAAGTTTC	131	C	T	18	2	16	C/T	0.1111	SNP
Lib10^4_#1 50_Jm^2 Selection	TAG_BX_ATATATGGCATA	131	C	T	17	2	15	C/T	0.1176	SNP
Lib10^4_#1 50_Jm^2 Selection	TAG_BX_ATATATTAAGTT	118	G	A	85	67	17	G/A	0.7882	SNP
Lib10^4_#1 50_Jm^2 Selection	TAG_BX_ATATATTTAGAG	71	C	G	85	73	9	C/G	0.8588	SNP
Lib10^4_#1 50_Jm^2 Selection	TAG_BX_ATATGTGCAACT	121	G	A	106	48	57	G/A	0.4528	SNP
Lib10^4_#1 50_Jm^2 Selection	TAG_BX_ATATTACTGCTC	118	G	A	101	11	90	G/A	0.1089	SNP
Lib10^4_#1 50_Jm^2 Selection	TAG_BX_ATATTTCAATAA	118	G	A	18	3	15	G/A	0.1667	SNP
Lib10^4_#1 50_Jm^2 Selection	TAG_BX_ATATTTTTGGAA	5	G	A	53	12	41	G/A	0.2264	SNP
Lib10^4_#1 50_Jm^2 Selection	TAG_BX_ATATTTTTGGAA	131	C	T	53	34	19	C/T	0.6415	SNP
Lib10^4_#1 50_Jm^2 Selection	TAG_BX_ATCAACCGATAG	131	C	T	78	60	17	C/T	0.7692	SNP
Lib10^4_#1 50_Jm^2 Selection	TAG_BX_ATCAACCGATAG	69	T	C	78	8	68	T/C	0.1026	SNP
Lib10^4_#1 50_Jm^2 Selection	TAG_BX_ATCAACGCGTCG	126	G	T	33	23	10	G/T	0.697	SNP
Lib10^4_#1 50_Jm^2 Selection	TAG_BX_ATCAGTAAAGGC	121	G	A	56	42	14	G/A	0.75	SNP
Lib10^4_#1 50_Jm^2 Selection	TAG_BX_ATCATATGACCT	85	G	A	33	27	5	G/A	0.8182	SNP
Lib10^4_#1 50_Jm^2 Selection	TAG_BX_ATCCCGCTTCGA	5	G	A	24	24	0	G/A	1	SNP
Lib10^4_#1 50_Jm^2 Selection	TAG_BX_ATCCCTCATAGG	130	C	T	36	26	9	C/T	0.7222	SNP
Lib10^4_#1 50_Jm^2 Selection	TAG_BX_ATCCCTCATAGG	118	G	A	36	5	31	G/A	0.1389	SNP
Lib10^4_#1 50_Jm^2 Selection	TAG_BX_ATCCCTCATAGG	69	T	C	36	4	32	T/C	0.1111	SNP
Lib10^4_#1 50_Jm^2 Selection	TAG_BX_ATCCTCTTTGAT	131	C	T	111	90	20	C/T	0.8108	SNP
Lib10^4_#1 50_Jm^2 Selection	TAG_BX_ATCCTGCTACTC	130	C	T	62	51	10	C/T	0.8226	SNP
Lib10^4_#1 50_Jm^2 Selection	TAG_BX_ATCGACTGTCAT	131	C	T	47	37	9	C/T	0.7872	SNP
Lib10^4_#1 50_Jm^2 Selection	TAG_BX_ATCGACTTGCTT	69	T	C	17	2	15	T/C	0.1176	SNP
Lib10^4_#1 50_Jm^2 Selection	TAG_BX_ATCGACTTGCTT	118	G	A	17	10	7	G/A	0.5882	SNP
Lib10^4_#1 50_Jm^2 Selection	TAG_BX_ATCGCGTAGCTA	5	G	C	49	45	4	G/C	0.9184	SNP
Lib10^4_#1 50_Jm^2 Selection	TAG_BX_ATCGGACATCTT	118	G	A	132	86	45	G/A	0.6515	SNP
Lib10^4_#1 50_Jm^2 Selection	TAG_BX_ATCGGGGCCCTA	85	G	A	54	44	8	G/A	0.8148	SNP
Lib10^4_#1 50_Jm^2 Selection	TAG_BX_ATCTCTCGGATG	130	C	T	81	55	23	C/T	0.679	SNP
Lib10^4_#1 50_Jm^2 Selection	TAG_BX_ATCTCTTGCTTA	121	G	A	54	44	10	G/A	0.8148	SNP
Lib10^4_#1 50_Jm^2 Selection	TAG_BX_ATGAGGGACTTC	5	G	A	13	11	2	G/A	0.8462	SNP
Lib10^4_#1 50_Jm^2 Selection	TAG_BX_ATGAGTACCATG	118	G	A	73	57	16	G/A	0.7808	SNP
Lib10^4_#1 50_Jm^2 Selection	TAG_BX_ATGCCGTAATGG	5	G	A	40	35	4	G/A	0.875	SNP
Lib10^4_#1 50_Jm^2 Selection	TAG_BX_ATGCGCTTGTTT	118	G	A	42	34	8	G/A	0.8095	SNP
Lib10^4_#1 50_Jm^2 Selection	TAG_BX_ATGGATAGCAGT	118	G	A	111	84	26	G/A	0.7568	SNP
Lib10^4_#1 50_Jm^2 Selection	TAG_BX_ATGGATTTTGTA	130	C	T	48	35	12	C/T	0.7292	SNP
Lib10^4_#1 50_Jm^2 Selection	TAG_BX_ATGGGGATAGTG	5	G	A	31	27	3	G/A	0.871	SNP
Lib10^4_#1 50_Jm^2 Selection	TAG_BX_ATGGGGATAGTG	69	T	C	31	4	27	T/C	0.129	SNP
Lib10^4_#1 50_Jm^2 Selection	TAG_BX_ATGGGTCAGTAT	131	C	T	26	22	4	C/T	0.8462	SNP
Lib10^4_#1 50_Jm^2 Selection	TAG_BX_ATGGTTCCTGTT	97	A	G	29	24	5	A/G	0.8276	SNP
Lib10^4_#1 50_Jm^2 Selection	TAG_BX_ATGTATTAGGTA	118	G	A	55	44	10	G/A	0.8	SNP
Lib10^4_#1 50_Jm^2 Selection	TAG_BX_ATGTGTGCACCG	85	G	A	128	40	87	G/A	0.3125	SNP
Lib10^4_#1 50_Jm^2 Selection	TAG_BX_ATGTTCCGTAGT	85	G	A	91	75	15	G/A	0.8242	SNP
Lib10^4_#1 50_Jm^2 Selection	TAG_BX_ATTAACTTCGCT	85	G	A	60	53	4	G/A	0.8833	SNP
Lib10^4_#1 50_Jm^2 Selection	TAG_BX_ATTACAGGGCAT	121	G	A	87	14	11	G/A	0.1609	SNP
Lib10^4_#1 50_Jm^2 Selection	TAG_BX_ATTACCCCGTTG	131	C	T	41	30	8	C/T	0.7317	SNP
Lib10^4_#1 50_Jm^2 Selection	TAG_BX_ATTAGCTATGCA	131	C	T	66	48	17	C/T	0.7273	SNP
Lib10^4_#1 50_Jm^2 Selection	TAG_BX_ATTATGCTTGAA	121	G	A	77	60	17	G/A	0.7792	SNP
Lib10^4_#1 50_Jm^2 Selection	TAG_BX_ATTATTTGTTTA	85	G	A	55	49	5	G/A	0.8909	SNP
Lib10^4_#1 50_Jm^2 Selection	TAG_BX_ATTCCGGTATTA	121	G	A	108	85	21	G/A	0.787	SNP
Lib10^4_#1 50_Jm^2 Selection	TAG_BX_ATTCGTTCTGTA	121	G	A	115	95	20	G/A	0.8261	SNP
Lib10^4_#1 50_Jm^2 Selection	TAG_BX_ATTCTAAATTTT	130	C	T	91	11	13	C/T	0.1209	SNP
Lib10^4_#1 50_Jm^2 Selection	TAG_BX_ATTCTTTGCACG	118	G	A	52	40	12	G/A	0.7692	SNP
Lib10^4_#1 50_Jm^2 Selection	TAG_BX_ATTGCGACTCTG	-12	C	G	31	30	1	C/G	0.9677	SNP
Lib10^4_#1 50_Jm^2 Selection	TAG_BX_ATTGGACTGGTC	85	G	C	80	63	13	G/C	0.7875	SNP
Lib10^4_#1 50_Jm^2 Selection	TAG_BX_ATTGGCTGTTTA	85	G	A	68	55	13	G/A	0.8088	SNP
Lib10^4_#1 50_Jm^2 Selection	TAG_BX_ATTGGTTATTAT	131	C	T	36	30	5	C/T	0.8333	SNP
Lib10^4_#1 50_Jm^2 Selection	TAG_BX_ATTGTAAGACTT	69	T	C	110	13	92	T/C	0.1182	SNP
Lib10^4_#1 50_Jm^2 Selection	TAG_BX_ATTGTAAGACTT	85	G	A	110	60	49	G/A	0.5455	SNP
Lib10^4_#1 50_Jm^2 Selection	TAG_BX_ATTGTTCGCTGA	5	G	C	95	43	52	G/C	0.4526	SNP
Lib10^4_#1 50_Jm^2 Selection	TAG_BX_ATTGTTCGCTGA	69	T	C	95	10	83	T/C	0.1053	SNP
Lib10^4_#1 50_Jm^2 Selection	TAG_BX_ATTTCTGTTGAT	130	C	T	57	45	9	C/T	0.7895	SNP
Lib10^4_#1 50_Jm^2 Selection	TAG_BX_ATTTGTGATTGT	130	C	T	199	24	36	C/T	0.1206	SNP
Lib10^4_#1 50_Jm^2 Selection	TAG_BX_ATTTTACGGTCA	130	C	T	63	51	11	C/T	0.8095	SNP
Lib10^4_#1 50_Jm^2 Selection	TAG_BX_ATTTTGATCACC	131	C	T	91	80	10	C/T	0.8791	SNP
Lib10^4_#1 50_Jm^2 Selection	TAG_BX_CAAAAATCTATC	118	G	A	75	64	8	G/A	0.8533	SNP
Lib10^4_#1 50_Jm^2 Selection	TAG_BX_CAAAAGCGTGTT	5	G	C	40	38	2	G/C	0.95	SNP
Lib10^4_#1 50_Jm^2 Selection	TAG_BX_CAAGGCCATATT	68	T	G	71	63	7	T/G	0.8873	SNP
Lib10^4_#1 50_Jm^2 Selection	TAG_BX_CAATAGGTGCAG	118	G	A	59	47	12	G/A	0.7966	SNP
Lib10^4_#1 50_Jm^2 Selection	TAG_BX_CAATGGATACTA	122	G	A	156	121	34	G/A	0.7756	SNP
Lib10^4_#1 50_Jm^2 Selection	TAG_BX_CAATTTTGTTGT	97	A	G	35	28	7	A/G	0.8	SNP
Lib10^4_#1 50_Jm^2 Selection	TAG_BX_CACATTGCGTGC	130	C	T	121	92	27	C/T	0.7603	SNP
Lib10^4_#1 50_Jm^2 Selection	TAG_BX_CACCAGGGGTGT	121	G	A	55	39	16	G/A	0.7091	SNP
Lib10^4_#1 50_Jm^2 Selection	TAG_BX_CACCCTTTGGTC	130	C	T	131	58	71	C/T	0.4427	SNP
Lib10^4_#1 50_Jm^2 Selection	TAG_BX_CACGCCTGCTTC	118	G	A	48	38	10	G/A	0.7917	SNP
Lib10^4_#1 50_Jm^2 Selection	TAG_BX_CACGTCGTCACC	118	G	A	55	43	12	G/A	0.7818	SNP
Lib10^4_#1 50_Jm^2 Selection	TAG_BX_CACGTGTCGCCC	58	T	G	12	2	10	T/G	0.1667	SNP
Lib10^4_#1 50_Jm^2 Selection	TAG_BX_CACGTGTCGCCC	5	G	A	12	10	2	G/A	0.8333	SNP
Lib10^4_#1 50_Jm^2 Selection	TAG_BX_CACGTGTCGGGC	131	C	T	96	74	20	C/T	0.7708	SNP
Lib10^4_#1 50_Jm^2 Selection	TAG_BX_CACTCTGCACGG	118	G	A	74	54	18	G/A	0.7297	SNP
Lib10^4_#1 50_Jm^2 Selection	TAG_BX_CAGAACCGCTGA	5	G	A	16	14	2	G/A	0.875	SNP
Lib10^4_#1 50_Jm^2 Selection	TAG_BX_CAGCACGCCGTT	118	G	A	73	58	14	G/A	0.7945	SNP
Lib10^4_#1 50_Jm^2 Selection	TAG_BX_CAGCGCCATGGT	-12	C	G	23	22	1	C/G	0.9565	SNP
Lib10^4_#1 50_Jm^2 Selection	TAG_BX_CAGCGCCATGGT	107	T	C	23	3	19	T/C	0.1304	SNP
Lib10^4_#1 50_Jm^2 Selection	TAG_BX_CAGCTTAAGTTT	118	G	A	49	42	7	G/A	0.8571	SNP
Lib10^4_#1 50_Jm^2 Selection	TAG_BX_CAGGACTTGCAT	5	G	A	21	19	2	G/A	0.9048	SNP
Lib10^4_#1 50_Jm^2 Selection	TAG_BX_CAGGACTTGCAT	118	G	A	21	3	18	G/A	0.1429	SNP
Lib10^4_#1 50_Jm^2 Selection	TAG_BX_CAGGATGGCTAG	118	G	A	79	67	11	G/A	0.8481	SNP
Lib10^4_#1 50_Jm^2 Selection	TAG_BX_CAGGTCGTAGTT	118	G	A	32	25	6	G/A	0.7812	SNP
Lib10^4_#1 50_Jm^2 Selection	TAG_BX_CATAGTGCTCGA	5	G	C	22	22	0	G/C	1	SNP
Lib10^4_#1 50_Jm^2 Selection	TAG_BX_CATCTCTGACAC	118	G	A	43	33	10	G/A	0.7674	SNP
Lib10^4_#1 50_Jm^2 Selection	TAG_BX_CATGCTCGAGAG	118	G	A	66	7	58	G/A	0.1061	SNP
Lib10^4_#1 50_Jm^2 Selection	TAG_BX_CATGCTCGAGAG	131	C	T	66	48	18	C/T	0.7273	SNP
Lib10^4_#1 50_Jm^2 Selection	TAG_BX_CATGCTTCGGTA	85	G	A	55	46	9	G/A	0.8364	SNP
Lib10^4_#1 50_Jm^2 Selection	TAG_BX_CATGGACTTAAT	122	G	A	91	78	13	G/A	0.8571	SNP
Lib10^4_#1 50_Jm^2 Selection	TAG_BX_CATGGGGAGATT	5	G	A	14	14	0	G/A	1	SNP
Lib10^4_#1 50_Jm^2 Selection	TAG_BX_CATGGGGAGATT	130	C	T	14	2	12	C/T	0.1429	SNP
Lib10^4_#1 50_Jm^2 Selection	TAG_BX_CATGTTCTTAGT	130	C	T	73	52	20	C/T	0.7123	SNP
Lib10^4_#1 50_Jm^2 Selection	TAG_BX_CATTAGTAGATC	55	A	C	26	3	23	A/C	0.1154	SNP
Lib10^4_#1 50_Jm^2 Selection	TAG_BX_CATTAGTAGATC	131	C	T	26	3	23	C/T	0.1154	SNP
Lib10^4_#1 50_Jm^2 Selection	TAG_BX_CATTCTTCTGTT	131	C	T	70	57	11	C/T	0.8143	SNP
Lib10^4_#1 50_Jm^2 Selection	TAG_BX_CATTGGATCGTC	121	G	A	40	26	14	G/A	0.65	SNP
Lib10^4_#1 50_Jm^2 Selection	TAG_BX_CATTGGCCGGTT	122	G	A	56	52	3	G/A	0.9286	SNP
Lib10^4_#1 50_Jm^2 Selection	TAG_BX_CCAACTTGTTTA	118	G	A	121	94	26	G/A	0.7769	SNP
Lib10^4_#1 50_Jm^2 Selection	TAG_BX_CCAAGTCCAGGT	85	G	A	75	56	19	G/A	0.7467	SNP
Lib10^4_#1 50_Jm^2 Selection	TAG_BX_CCAATCTCGTAT	130	C	T	74	54	20	C/T	0.7297	SNP
Lib10^4_#1 50_Jm^2 Selection	TAG_BX_CCACAATAGTTG	130	C	T	123	21	24	C/T	0.1707	SNP
Lib10^4_#1 50_Jm^2 Selection	TAG_BX_CCACCATTCCCT	118	G	A	26	3	23	G/A	0.1154	SNP
Lib10^4_#1 50_Jm^2 Selection	TAG_BX_CCACCATTCCCT	131	C	T	26	14	12	C/T	0.5385	SNP
Lib10^4_#1 50_Jm^2 Selection	TAG_BX_CCACCATTTCTC	118	G	A	52	44	7	G/A	0.8462	SNP
Lib10^4_#1 50_Jm^2 Selection	TAG_BX_CCAGTACTTGAA	118	G	A	19	2	16	G/A	0.1053	SNP
Lib10^4_#1 50_Jm^2 Selection	TAG_BX_CCAGTATGATTT	131	C	T	55	39	16	C/T	0.7091	SNP
Lib10^4_#1 50_Jm^2 Selection	TAG_BX_CCATAGATTCTT	5	G	A	13	13	0	G/A	1	SNP
Lib10^4_#1 50_Jm^2 Selection	TAG_BX_CCATCCGCAGTT	96	T	A	50	45	5	T/A	0.9	SNP
Lib10^4_#1 50_Jm^2 Selection	TAG_BX_CCATTTTCATGG	118	G	A	35	27	8	G/A	0.7714	SNP
Lib10^4_#1 50_Jm^2 Selection	TAG_BX_CCATTTTCATGG	131	C	T	35	4	31	C/T	0.1143	SNP
Lib10^4_#1 50_Jm^2 Selection	TAG_BX_CCCATCGATATT	122	G	A	46	36	10	G/A	0.7826	SNP
Lib10^4_#1 50_Jm^2 Selection	TAG_BX_CCCATCGATATT	118	G	A	46	5	41	G/A	0.1087	SNP
Lib10^4_#1 50_Jm^2 Selection	TAG_BX_CCCCCTCCGTCC	85	G	A	71	53	17	G/A	0.7465	SNP
Lib10^4_#1 50_Jm^2 Selection	TAG_BX_CCCCTTAACGGT	118	G	A	76	62	14	G/A	0.8158	SNP
Lib10^4_#1 50_Jm^2 Selection	TAG_BX_CCCGACAAAAAT	69	T	C	81	9	70	T/C	0.1111	SNP
Lib10^4_#1 50_Jm^2 Selection	TAG_BX_CCCGACAAAAAT	134	C	G	81	60	21	C/G	0.7407	SNP
Lib10^4_#1 50_Jm^2 Selection	TAG_BX_CCCGGGCTCCTC	131	C	T	103	79	22	C/T	0.767	SNP
Lib10^4_#1 50_Jm^2 Selection	TAG_BX_CCCTGCCGTTGA	5	G	A	102	12	90	G/A	0.1176	SNP
Lib10^4_#1 50_Jm^2 Selection	TAG_BX_CCCTGCTCATGT	130	C	T	133	99	29	C/T	0.7444	SNP
Lib10^4_#1 50_Jm^2 Selection	TAG_BX_CCCTTTTTTGCC	118	G	A	42	27	15	G/A	0.6429	SNP
Lib10^4_#1 50_Jm^2 Selection	TAG_BX_CCGATATAGCCT	118	G	A	50	40	10	G/A	0.8	SNP
Lib10^4_#1 50_Jm^2 Selection	TAG_BX_CCGATCGACTCA	131	C	T	49	38	10	C/T	0.7755	SNP
Lib10^4_#1 50_Jm^2 Selection	TAG_BX_CCGATCGACTCA	118	G	A	49	5	44	G/A	0.102	SNP
Lib10^4_#1 50_Jm^2 Selection	TAG_BX_CCGATGTATGTT	85	G	A	53	47	6	G/A	0.8868	SNP
Lib10^4_#1 50_Jm^2 Selection	TAG_BX_CCGATGTTTTTC	118	G	A	28	22	4	G/A	0.7857	SNP
Lib10^4_#1 50_Jm^2 Selection	TAG_BX_CCGGCAAGGGCG	5	G	A	23	21	2	G/A	0.913	SNP
Lib10^4_#1 50_Jm^2 Selection	TAG_BX_CCGGCTCTACGA	5	G	A	26	21	5	G/A	0.8077	SNP
Lib10^4_#1 50_Jm^2 Selection	TAG_BX_CCGTGATGTTCA	121	G	A	44	34	10	G/A	0.7727	SNP
Lib10^4_#1 50_Jm^2 Selection	TAG_BX_CCTAAGTATTTT	130	C	T	53	36	15	C/T	0.6792	SNP
Lib10^4_#1 50_Jm^2 Selection	TAG_BX_CCTACAGCGAGA	121	G	A	125	101	24	G/A	0.808	SNP
Lib10^4_#1 50_Jm^2 Selection	TAG_BX_CCTATCCGGGCG	121	G	A	65	52	13	G/A	0.8	SNP
Lib10^4_#1 50_Jm^2 Selection	TAG_BX_CCTATGCCTGAA	118	G	A	104	87	13	G/A	0.8365	SNP
Lib10^4_#1 50_Jm^2 Selection	TAG_BX_CCTCAACTATTT	5	G	A	25	24	1	G/A	0.96	SNP
Lib10^4_#1 50_Jm^2 Selection	TAG_BX_CCTGATAATTTC	118	G	A	84	63	19	G/A	0.75	SNP
Lib10^4_#1 50_Jm^2 Selection	TAG_BX_CCTTTATTTTAA	69	T	C	77	10	66	T/C	0.1299	SNP
Lib10^4_#1 50_Jm^2 Selection	TAG_BX_CCTTTATTTTAA	95	C	G	77	69	6	C/G	0.8961	SNP
Lib10^4_#1 50_Jm^2 Selection	TAG_BX_CGAAGGGATTCA	130	C	T	78	59	16	C/T	0.7564	SNP
Lib10^4_#1 50_Jm^2 Selection	TAG_BX_CGAATGGCCGAC	131	C	T	166	63	103	C/T	0.3795	SNP
Lib10^4_#1 50_Jm^2 Selection	TAG_BX_CGAATGGCCGAC	130	C	T	166	75	91	C/T	0.4518	SNP
Lib10^4_#1 50_Jm^2 Selection	TAG_BX_CGACTCGATGGG	131	C	T	87	69	17	C/T	0.7931	SNP
Lib10^4_#1 50_Jm^2 Selection	TAG_BX_CGAGACTGTCGT	131	C	T	90	71	19	C/T	0.7889	SNP
Lib10^4_#1 50_Jm^2 Selection	TAG_BX_CGAGAGCGCATG	85	G	A	59	8	51	G/A	0.1356	SNP
Lib10^4_#1 50_Jm^2 Selection	TAG_BX_CGAGAGCGCATG	95	C	G	59	40	19	C/G	0.678	SNP
Lib10^4_#1 50_Jm^2 Selection	TAG_BX_CGAGTGTCTATC	130	C	T	72	56	13	C/T	0.7778	SNP
Lib10^4_#1 50_Jm^2 Selection	TAG_BX_CGAGTTAATTGG	130	C	T	69	56	10	C/T	0.8116	SNP
Lib10^4_#1 50_Jm^2 Selection	TAG_BX_CGATCATTAATC	118	G	A	96	71	25	G/A	0.7396	SNP
Lib10^4_#1 50_Jm^2 Selection	TAG_BX_CGATCATTAATC	69	T	C	96	13	81	T/C	0.1354	SNP
Lib10^4_#1 50_Jm^2 Selection	TAG_BX_CGATCGAGATGG	91	G	A	20	16	4	G/A	0.8	SNP
Lib10^4_#1 50_Jm^2 Selection	TAG_BX_CGATGAGGTGTG	118	G	A	46	33	13	G/A	0.7174	SNP
Lib10^4_#1 50_Jm^2 Selection	TAG_BX_CGATGCTGGTAT	130	C	T	67	50	17	C/T	0.7463	SNP
Lib10^4_#1 50_Jm^2 Selection	TAG_BX_CGATGTCGTTAA	131	C	T	49	37	12	C/T	0.7551	SNP
Lib10^4_#1 50_Jm^2 Selection	TAG_BX_CGATGTCGTTAA	69	T	C	49	5	44	T/C	0.102	SNP
Lib10^4_#1 50_Jm^2 Selection	TAG_BX_CGATTCTGTATG	85	G	A	151	128	18	G/A	0.8477	SNP
Lib10^4_#1 50_Jm^2 Selection	TAG_BX_CGCACGCGTGAT	121	G	A	108	83	25	G/A	0.7685	SNP
Lib10^4_#1 50_Jm^2 Selection	TAG_BX_CGCACTGCCCCC	131	C	T	38	27	8	C/T	0.7105	SNP
Lib10^4_#1 50_Jm^2 Selection	TAG_BX_CGCGCGCCTGGA	69	T	C	27	3	23	T/C	0.1111	SNP
Lib10^4_#1 50_Jm^2 Selection	TAG_BX_CGCGCGCCTGGA	131	C	T	27	19	8	C/T	0.7037	SNP
Lib10^4_#1 50_Jm^2 Selection	TAG_BX_CGCGCGCCTGGA	55	A	C	27	3	24	A/C	0.1111	SNP
Lib10^4_#1 50_Jm^2 Selection	TAG_BX_CGCGTCAATGAC	131	C	T	69	7	62	C/T	0.1014	SNP
Lib10^4_#1 50_Jm^2 Selection	TAG_BX_CGCGTCACGGGG	131	C	T	33	26	7	C/T	0.7879	SNP
Lib10^4_#1 50_Jm^2 Selection	TAG_BX_CGCTCCTTGTTT	118	G	A	49	38	10	G/A	0.7755	SNP
Lib10^4_#1 50_Jm^2 Selection	TAG_BX_CGCTGTGCGGAT	5	G	A	25	21	4	G/A	0.84	SNP
Lib10^4_#1 50_Jm^2 Selection	TAG_BX_CGCTTCCTCTAC	5	G	A	17	16	1	G/A	0.9412	SNP
Lib10^4_#1 50_Jm^2 Selection	TAG_BX_CGCTTCCTCTAC	69	T	C	17	2	14	T/C	0.1176	SNP
Lib10^4_#1 50_Jm^2 Selection	TAG_BX_CGGAACTAATTA	85	G	A	53	43	9	G/A	0.8113	SNP
Lib10^4_#1 50_Jm^2 Selection	TAG_BX_CGGACCTGCTAT	121	G	A	55	45	10	G/A	0.8182	SNP
Lib10^4_#1 50_Jm^2 Selection	TAG_BX_CGGAGGTCTTCT	121	G	A	63	54	8	G/A	0.8571	SNP
Lib10^4_#1 50_Jm^2 Selection	TAG_BX_CGGATTCGATTC	69	T	C	86	9	75	T/C	0.1047	SNP
Lib10^4_#1 50_Jm^2 Selection	TAG_BX_CGGATTCGATTC	131	C	T	86	69	14	C/T	0.8023	SNP
Lib10^4_#1 50_Jm^2 Selection	TAG_BX_CGGGCGCGCTCA	130	C	T	34	22	8	C/T	0.6471	SNP
Lib10^4_#1 50_Jm^2 Selection	TAG_BX_CGGGCGTGTTTT	118	G	A	75	58	16	G/A	0.7733	SNP
Lib10^4_#1 50_Jm^2 Selection	TAG_BX_CGGGTATTAAGA	118	G	A	45	37	7	G/A	0.8222	SNP
Lib10^4_#1 50_Jm^2 Selection	TAG_BX_CGGGTGCAGTCC	121	G	A	98	80	17	G/A	0.8163	SNP
Lib10^4_#1 50_Jm^2 Selection	TAG_BX_CGGTATAATCCG	131	C	T	39	30	9	C/T	0.7692	SNP
Lib10^4_#1 50_Jm^2 Selection	TAG_BX_CGGTATTAATTT	123	T	C	56	11	8	T/C	0.1964	SNP
Lib10^4_#1 50_Jm^2 Selection	TAG_BX_CGGTGAAAGTCG	69	T	C	96	10	84	T/C	0.1042	SNP
Lib10^4_#1 50_Jm^2 Selection	TAG_BX_CGGTGAAAGTCG	130	C	T	96	64	32	C/T	0.6667	SNP
Lib10^4_#1 50_Jm^2 Selection	TAG_BX_CGGTGTCATCTG	5	G	A	16	14	2	G/A	0.875	SNP
Lib10^4_#1 50_Jm^2 Selection	TAG_BX_CGGTTTTCAGTT	118	G	A	119	90	27	G/A	0.7563	SNP
Lib10^4_#1 50_Jm^2 Selection	TAG_BX_CGTATGGCTCCT	130	C	T	25	3	22	C/T	0.12	SNP
Lib10^4_#1 50_Jm^2 Selection	TAG_BX_CGTATGGCTCCT	121	G	A	25	19	6	G/A	0.76	SNP
Lib10^4_#1 50_Jm^2 Selection	TAG_BX_CGTCAGTTCTAC	122	G	A	45	33	12	G/A	0.7333	SNP
Lib10^4_#1 50_Jm^2 Selection	TAG_BX_CGTCCCGGATAC	118	G	A	31	25	6	G/A	0.8065	SNP
Lib10^4_#1 50_Jm^2 Selection	TAG_BX_CGTCCGCGATAA	118	G	A	69	52	15	G/A	0.7536	SNP
Lib10^4_#1 50_Jm^2 Selection	TAG_BX_CGTGAAAGTGGG	85	G	A	47	37	10	G/A	0.7872	SNP
Lib10^4_#1 50_Jm^2 Selection	TAG_BX_CGTGACCGTCTC	131	C	T	51	38	11	C/T	0.7451	SNP
Lib10^4_#1 50_Jm^2 Selection	TAG_BX_CGTGAGAGATTA	5	G	A	28	27	1	G/A	0.9643	SNP
Lib10^4_#1 50_Jm^2 Selection	TAG_BX_CGTGCGCCACTG	131	C	T	124	95	25	C/T	0.7661	SNP
Lib10^4_#1 50_Jm^2 Selection	TAG_BX_CGTGCTTCCCCT	130	C	T	38	27	10	C/T	0.7105	SNP
Lib10^4_#1 50_Jm^2 Selection	TAG_BX_CGTGCTTCCCCT	118	G	A	38	4	34	G/A	0.1053	SNP
Lib10^4_#1 50_Jm^2 Selection	TAG_BX_CGTGGGGGGTGG	130	C	T	80	30	50	C/T	0.375	SNP
Lib10^4_#1 50_Jm^2 Selection	TAG_BX_CGTGGGGGGTGG	118	G	A	80	38	42	G/A	0.475	SNP
Lib10^4_#1 50_Jm^2 Selection	TAG_BX_CGTGGTCGAGAA	130	C	T	45	32	11	C/T	0.7111	SNP
Lib10^4_#1 50_Jm^2 Selection	TAG_BX_CGTGGTGCGAGC	5	G	A	20	20	0	G/A	1	SNP
Lib10^4_#1 50_Jm^2 Selection	TAG_BX_CGTGGTGTCCCT	130	C	T	118	87	28	C/T	0.7373	SNP
Lib10^4_#1 50_Jm^2 Selection	TAG_BX_CGTGTTACTGTT	85	G	A	86	74	12	G/A	0.8605	SNP
Lib10^4_#1 50_Jm^2 Selection	TAG_BX_CGTGTTCTGATC	118	G	A	131	109	22	G/A	0.8321	SNP
Lib10^4_#1 50_Jm^2 Selection	TAG_BX_CGTTACAGGCCT	118	G	A	14	13	1	G/A	0.9286	SNP
Lib10^4_#1 50_Jm^2 Selection	TAG_BX_CGTTAGTATAGA	85	G	A	94	72	19	G/A	0.766	SNP
Lib10^4_#1 50_Jm^2 Selection	TAG_BX_CGTTCATTTTTG	118	G	A	52	44	8	G/A	0.8462	SNP
Lib10^4_#1 50_Jm^2 Selection	TAG_BX_CGTTCTGTGTAA	5	G	A	20	19	1	G/A	0.95	SNP
Lib10^4_#1 50_Jm^2 Selection	TAG_BX_CGTTGAGACAGT	85	G	A	61	47	12	G/A	0.7705	SNP
Lib10^4_#1 50_Jm^2 Selection	TAG_BX_CGTTGGAACTAC	131	C	T	54	40	14	C/T	0.7407	SNP
Lib10^4_#1 50_Jm^2 Selection	TAG_BX_CGTTGGACAGGT	121	G	A	84	64	18	G/A	0.7619	SNP
Lib10^4_#1 50_Jm^2 Selection	TAG_BX_CGTTGGGTGCAC	85	G	A	73	57	14	G/A	0.7808	SNP
Lib10^4_#1 50_Jm^2 Selection	TAG_BX_CGTTGTCAAACT	121	G	A	59	51	8	G/A	0.8644	SNP
Lib10^4_#1 50_Jm^2 Selection	TAG_BX_CGTTGTTCCACA	118	G	A	55	42	13	G/A	0.7636	SNP
Lib10^4_#1 50_Jm^2 Selection	TAG_BX_CGTTTTGTGGTA	85	G	A	34	29	3	G/A	0.8529	SNP
Lib10^4_#1 50_Jm^2 Selection	TAG_BX_CGTTTTGTTCTT	118	G	A	47	37	10	G/A	0.7872	SNP
Lib10^4_#1 50_Jm^2 Selection	TAG_BX_CTACCGGGCCGG	5	G	A	44	43	1	G/A	0.9773	SNP
Lib10^4_#1 50_Jm^2 Selection	TAG_BX_CTACCGGGCCGG	121	G	A	43	5	37	G/A	0.1163	SNP
Lib10^4_#1 50_Jm^2 Selection	TAG_BX_CTAGTTCTGGGA	69	T	C	34	4	30	T/C	0.1176	SNP
Lib10^4_#1 50_Jm^2 Selection	TAG_BX_CTAGTTCTGGGA	118	G	A	34	32	2	G/A	0.9412	SNP
Lib10^4_#1 50_Jm^2 Selection	TAG_BX_CTAGTTTCTATC	85	G	A	99	81	15	G/A	0.8182	SNP
Lib10^4_#1 50_Jm^2 Selection	TAG_BX_CTATATGTTAGT	122	G	A	98	66	29	G/A	0.6735	SNP
Lib10^4_#1 50_Jm^2 Selection	TAG_BX_CTATATGTTAGT	69	T	C	98	10	87	T/C	0.102	SNP
Lib10^4_#1 50_Jm^2 Selection	TAG_BX_CTATGAGCGGAA	118	G	A	27	3	24	G/A	0.1111	SNP
Lib10^4_#1 50_Jm^2 Selection	TAG_BX_CTATGAGCGGAA	85	G	A	27	24	3	G/A	0.8889	SNP
Lib10^4_#1 50_Jm^2 Selection	TAG_BX_CTATGTCTGGAG	55	A	C	32	4	27	A/C	0.125	SNP
Lib10^4_#1 50_Jm^2 Selection	TAG_BX_CTATGTCTGGAG	118	G	A	32	4	28	G/A	0.125	SNP
Lib10^4_#1 50_Jm^2 Selection	TAG_BX_CTATGTCTGGAG	5	G	A	32	31	1	G/A	0.9688	SNP
Lib10^4_#1 50_Jm^2 Selection	TAG_BX_CTATTCCCCGTT	118	G	A	35	5	30	G/A	0.1429	SNP
Lib10^4_#1 50_Jm^2 Selection	TAG_BX_CTATTCCCCGTT	122	G	A	35	25	9	G/A	0.7143	SNP
Lib10^4_#1 50_Jm^2 Selection	TAG_BX_CTCCGCCCTGGT	5	G	C	50	49	1	G/C	0.98	SNP
Lib10^4_#1 50_Jm^2 Selection	TAG_BX_CTCGCGCTTTGT	85	G	A	96	86	9	G/A	0.8958	SNP
Lib10^4_#1 50_Jm^2 Selection	TAG_BX_CTCGCTCGTAAA	130	C	T	84	16	10	C/T	0.1905	SNP
Lib10^4_#1 50_Jm^2 Selection	TAG_BX_CTCGGGAGATTT	118	G	A	49	5	44	G/A	0.102	SNP
Lib10^4_#1 50_Jm^2 Selection	TAG_BX_CTCGGGAGATTT	131	C	T	49	35	12	C/T	0.7143	SNP
Lib10^4_#1 50_Jm^2 Selection	TAG_BX_CTCGGTTGTTTC	121	G	A	65	50	14	G/A	0.7692	SNP
Lib10^4_#1 50_Jm^2 Selection	TAG_BX_CTCGTGGTGATC	85	G	A	51	38	9	G/A	0.7451	SNP
Lib10^4_#1 50_Jm^2 Selection	TAG_BX_CTCTCGTGAGTA	85	G	A	77	61	14	G/A	0.7922	SNP
Lib10^4_#1 50_Jm^2 Selection	TAG_BX_CTCTCGTGAGTA	118	G	A	77	8	69	G/A	0.1039	SNP
Lib10^4_#1 50_Jm^2 Selection	TAG_BX_CTCTCTTATATG	69	T	C	38	4	34	T/C	0.1053	SNP
Lib10^4_#1 50_Jm^2 Selection	TAG_BX_CTCTCTTATATG	5	G	A	38	36	2	G/A	0.9474	SNP
Lib10^4_#1 50_Jm^2 Selection	TAG_BX_CTCTGTGTGCCT	121	G	A	93	75	18	G/A	0.8065	SNP
Lib10^4_#1 50_Jm^2 Selection	TAG_BX_CTGATATGGGCG	131	C	T	77	62	15	C/T	0.8052	SNP
Lib10^4_#1 50_Jm^2 Selection	TAG_BX_CTGCGGTGAGAC	118	G	A	27	3	24	G/A	0.1111	SNP
Lib10^4_#1 50_Jm^2 Selection	TAG_BX_CTGCGGTGAGAC	5	G	A	27	22	5	G/A	0.8148	SNP
Lib10^4_#1 50_Jm^2 Selection	TAG_BX_CTGCTACAGGAA	121	G	A	40	31	8	G/A	0.775	SNP
Lib10^4_#1 50_Jm^2 Selection	TAG_BX_CTGCTTTGTACG	5	G	A	22	20	2	G/A	0.9091	SNP
Lib10^4_#1 50_Jm^2 Selection	TAG_BX_CTGGAGGTTAAC	118	G	A	36	25	10	G/A	0.6944	SNP
Lib10^4_#1 50_Jm^2 Selection	TAG_BX_CTGGAGGTTAAC	131	C	T	36	4	32	C/T	0.1111	SNP
Lib10^4_#1 50_Jm^2 Selection	TAG_BX_CTGGATTTCACA	5	G	C	48	46	2	G/C	0.9583	SNP
Lib10^4_#1 50_Jm^2 Selection	TAG_BX_CTGGGCGTGTCC	5	G	C	20	20	0	G/C	1	SNP
Lib10^4_#1 50_Jm^2 Selection	TAG_BX_CTGGGGATTTCA	118	G	A	88	72	15	G/A	0.8182	SNP
Lib10^4_#1 50_Jm^2 Selection	TAG_BX_CTGGTGCCTTAT	130	C	T	70	55	14	C/T	0.7857	SNP
Lib10^4_#1 50_Jm^2 Selection	TAG_BX_CTGGTTTCTGCT	121	G	A	111	88	22	G/A	0.7928	SNP
Lib10^4_#1 50_Jm^2 Selection	TAG_BX_CTGTCATGAAAC	118	G	A	84	68	15	G/A	0.8095	SNP
Lib10^4_#1 50_Jm^2 Selection	TAG_BX_CTGTCCCTTAAC	121	G	A	23	19	4	G/A	0.8261	SNP
Lib10^4_#1 50_Jm^2 Selection	TAG_BX_CTGTTTTTCATT	118	G	A	64	51	13	G/A	0.7969	SNP
Lib10^4_#1 50_Jm^2 Selection	TAG_BX_CTTAAGGACTAT	130	C	T	53	39	14	C/T	0.7358	SNP
Lib10^4_#1 50_Jm^2 Selection	TAG_BX_CTTAGTGCGATG	85	G	A	80	67	13	G/A	0.8375	SNP
Lib10^4_#1 50_Jm^2 Selection	TAG_BX_CTTATGTGACTA	118	G	A	47	39	7	G/A	0.8298	SNP
Lib10^4_#1 50_Jm^2 Selection	TAG_BX_CTTCCTGTCGGA	130	C	T	58	44	13	C/T	0.7586	SNP
Lib10^4_#1 50_Jm^2 Selection	TAG_BX_CTTCGGCCTCCG	118	G	A	39	29	10	G/A	0.7436	SNP
Lib10^4_#1 50_Jm^2 Selection	TAG_BX_CTTCTACGAAAC	130	C	T	98	73	23	C/T	0.7449	SNP
Lib10^4_#1 50_Jm^2 Selection	TAG_BX_CTTCTCGGTCAA	130	C	T	178	138	39	C/T	0.7753	SNP
Lib10^4_#1 50_Jm^2 Selection	TAG_BX_CTTGGTTGACTG	118	G	A	18	12	6	G/A	0.6667	SNP
Lib10^4_#1 50_Jm^2 Selection	TAG_BX_CTTGTCGTCAGC	118	G	A	226	56	170	G/A	0.2478	SNP
Lib10^4_#1 50_Jm^2 Selection	TAG_BX_CTTGTTTGCTTT	5	G	A	16	12	4	G/A	0.75	SNP
Lib10^4_#1 50_Jm^2 Selection	TAG_BX_CTTTACTCGATT	91	G	C	36	26	10	G/C	0.7222	SNP
Lib10^4_#1 50_Jm^2 Selection	TAG_BX_CTTTACTCGATT	118	G	A	36	4	31	G/A	0.1111	SNP
Lib10^4_#1 50_Jm^2 Selection	TAG_BX_CTTTAGTATTCA	85	G	A	78	69	9	G/A	0.8846	SNP
Lib10^4_#1 50_Jm^2 Selection	TAG_BX_CTTTATCTGACT	85	G	A	85	72	12	G/A	0.8471	SNP
Lib10^4_#1 50_Jm^2 Selection	TAG_BX_CTTTCATGAATT	121	G	A	46	39	6	G/A	0.8478	SNP
Lib10^4_#1 50_Jm^2 Selection	TAG_BX_CTTTCCATGCTG	122	G	A	134	95	36	G/A	0.709	SNP
Lib10^4_#1 50_Jm^2 Selection	TAG_BX_CTTTGACCAGTT	130	C	T	76	63	13	C/T	0.8289	SNP
Lib10^4_#1 50_Jm^2 Selection	TAG_BX_CTTTGAGGATTA	118	G	A	55	43	11	G/A	0.7818	SNP
Lib10^4_#1 50_Jm^2 Selection	TAG_BX_CTTTTATTTGGA	5	G	C	32	29	3	G/C	0.9062	SNP
Lib10^4_#1 50_Jm^2 Selection	TAG_BX_CTTTTCATGTTT	118	G	A	49	40	8	G/A	0.8163	SNP
Lib10^4_#1 50_Jm^2 Selection	TAG_BX_CTTTTCGTTCAC	5	G	C	23	22	1	G/C	0.9565	SNP
Lib10^4_#1 50_Jm^2 Selection	TAG_BX_CTTTTGGCTTGA	131	C	T	59	48	10	C/T	0.8136	SNP
Lib10^4_#1 50_Jm^2 Selection	TAG_BX_CTTTTGTCAGGT	131	C	T	75	59	14	C/T	0.7867	SNP
Lib10^4_#1 50_Jm^2 Selection	TAG_BX_CTTTTGTTGATG	85	G	A	61	52	9	G/A	0.8525	SNP
Lib10^4_#1 50_Jm^2 Selection	TAG_BX_CTTTTTAATGCC	130	C	T	95	83	11	C/T	0.8737	SNP
Lib10^4_#1 50_Jm^2 Selection	TAG_BX_GAAAGTGCGCCC	5	G	C	61	55	6	G/C	0.9016	SNP
Lib10^4_#1 50_Jm^2 Selection	TAG_BX_GAACGGACCACT	121	G	A	43	35	8	G/A	0.814	SNP
Lib10^4_#1 50_Jm^2 Selection	TAG_BX_GAAGTCAGGCTA	69	T	C	40	5	34	T/C	0.125	SNP
Lib10^4_#1 50_Jm^2 Selection	TAG_BX_GAAGTTAAATGT	130	C	T	80	62	18	C/T	0.775	SNP
Lib10^4_#1 50_Jm^2 Selection	TAG_BX_GAATTCATAGTG	131	C	T	25	20	4	C/T	0.8	SNP
Lib10^4_#1 50_Jm^2 Selection	TAG_BX_GAATTGTTGATG	123	T	C	39	29	10	T/C	0.7436	SNP
Lib10^4_#1 50_Jm^2 Selection	TAG_BX_GACATATCATTG	5	G	A	12	12	0	G/A	1	SNP
Lib10^4_#1 50_Jm^2 Selection	TAG_BX_GACATTTATCCT	118	G	A	41	31	10	G/A	0.7561	SNP
Lib10^4_#1 50_Jm^2 Selection	TAG_BX_GACGCGCTGTTG	5	G	A	23	20	3	G/A	0.8696	SNP
Lib10^4_#1 50_Jm^2 Selection	TAG_BX_GACGCTGTTTAT	121	G	A	49	44	5	G/A	0.898	SNP
Lib10^4_#1 50_Jm^2 Selection	TAG_BX_GACGGTCTGGAT	69	T	C	60	8	49	T/C	0.1333	SNP
Lib10^4_#1 50_Jm^2 Selection	TAG_BX_GACGTTTATCGT	130	C	T	75	57	16	C/T	0.76	SNP
Lib10^4_#1 50_Jm^2 Selection	TAG_BX_GACTCGTCATTT	121	G	A	109	88	20	G/A	0.8073	SNP
Lib10^4_#1 50_Jm^2 Selection	TAG_BX_GACTTTGGGTGT	130	C	T	60	44	16	C/T	0.7333	SNP
Lib10^4_#1 50_Jm^2 Selection	TAG_BX_GACTTTTGGTCC	121	G	A	205	130	71	G/A	0.6341	SNP
Lib10^4_#1 50_Jm^2 Selection	TAG_BX_GACTTTTGGTCC	95	C	G	204	34	164	C/G	0.1667	SNP
Lib10^4_#1 50_Jm^2 Selection	TAG_BX_GAGAATTCCGGT	130	C	T	43	35	8	C/T	0.814	SNP
Lib10^4_#1 50_Jm^2 Selection	TAG_BX_GAGATTAGCGAG	134	C	G	107	84	22	C/G	0.785	SNP
Lib10^4_#1 50_Jm^2 Selection	TAG_BX_GAGATTGTTCTT	118	G	A	48	36	12	G/A	0.75	SNP
Lib10^4_#1 50_Jm^2 Selection	TAG_BX_GAGATTTCTTTT	85	G	A	25	22	3	G/A	0.88	SNP
Lib10^4_#1 50_Jm^2 Selection	TAG_BX_GAGCATCGATGA	118	G	A	27	22	5	G/A	0.8148	SNP
Lib10^4_#1 50_Jm^2 Selection	TAG_BX_GAGCGCAGTACT	131	C	T	41	34	7	C/T	0.8293	SNP
Lib10^4_#1 50_Jm^2 Selection	TAG_BX_GAGCTGGTCTGA	5	G	A	15	15	0	G/A	1	SNP
Lib10^4_#1 50_Jm^2 Selection	TAG_BX_GAGGAAAAACTT	118	G	A	38	4	33	G/A	0.1053	SNP
Lib10^4_#1 50_Jm^2 Selection	TAG_BX_GAGGAAAAACTT	121	G	A	38	32	6	G/A	0.8421	SNP
Lib10^4_#1 50_Jm^2 Selection	TAG_BX_GAGGACTGACTT	118	G	A	95	63	32	G/A	0.6632	SNP
Lib10^4_#1 50_Jm^2 Selection	TAG_BX_GAGGCATCAATG	85	G	A	115	97	15	G/A	0.8435	SNP
Lib10^4_#1 50_Jm^2 Selection	TAG_BX_GAGGTATGGTTT	121	G	A	93	13	17	G/A	0.1398	SNP
Lib10^4_#1 50_Jm^2 Selection	TAG_BX_GAGGTCCAGATA	118	G	A	28	20	8	G/A	0.7143	SNP
Lib10^4_#1 50_Jm^2 Selection	TAG_BX_GAGTACTACTTC	131	C	T	52	34	18	C/T	0.6538	SNP
Lib10^4_#1 50_Jm^2 Selection	TAG_BX_GAGTACTACTTC	118	G	A	52	6	45	G/A	0.1154	SNP
Lib10^4_#1 50_Jm^2 Selection	TAG_BX_GAGTGGCTTGAA	118	G	A	182	144	37	G/A	0.7912	SNP
Lib10^4_#1 50_Jm^2 Selection	TAG_BX_GAGTGGTGGCGT	130	C	T	51	39	12	C/T	0.7647	SNP
Lib10^4_#1 50_Jm^2 Selection	TAG_BX_GAGTGGTGGCGT	69	T	C	51	7	44	T/C	0.1373	SNP
Lib10^4_#1 50_Jm^2 Selection	TAG_BX_GAGTGGTGTTGG	95	C	G	54	47	6	C/G	0.8704	SNP
Lib10^4_#1 50_Jm^2 Selection	TAG_BX_GAGTTTCAGTGA	118	G	A	49	37	10	G/A	0.7551	SNP
Lib10^4_#1 50_Jm^2 Selection	TAG_BX_GATAGGGTTCTT	69	T	C	41	6	34	T/C	0.1463	SNP
Lib10^4_#1 50_Jm^2 Selection	TAG_BX_GATAGGGTTCTT	85	G	A	41	37	3	G/A	0.9024	SNP
Lib10^4_#1 50_Jm^2 Selection	TAG_BX_GATATGATCTCA	130	C	T	72	55	15	C/T	0.7639	SNP
Lib10^4_#1 50_Jm^2 Selection	TAG_BX_GATATTGCGAGG	121	G	A	79	12	17	G/A	0.1519	SNP
Lib10^4_#1 50_Jm^2 Selection	TAG_BX_GATATTGCGAGG	118	G	A	68	7	61	G/A	0.1029	SNP
Lib10^4_#1 50_Jm^2 Selection	TAG_BX_GATCCAGTTTGG	118	G	A	107	87	18	G/A	0.8131	SNP
Lib10^4_#1 50_Jm^2 Selection	TAG_BX_GATCGCTTACTA	118	G	A	98	83	15	G/A	0.8469	SNP
Lib10^4_#1 50_Jm^2 Selection	TAG_BX_GATCTTCTTTGG	95	C	G	57	36	17	C/G	0.6316	SNP
Lib10^4_#1 50_Jm^2 Selection	TAG_BX_GATGACATACCT	118	G	A	79	68	11	G/A	0.8608	SNP
Lib10^4_#1 50_Jm^2 Selection	TAG_BX_GATGCCTTATTG	118	G	A	36	30	6	G/A	0.8333	SNP
Lib10^4_#1 50_Jm^2 Selection	TAG_BX_GATGGGGCCAGT	118	G	A	40	36	4	G/A	0.9	SNP
Lib10^4_#1 50_Jm^2 Selection	TAG_BX_GATGTGGTTCGC	118	G	A	82	64	17	G/A	0.7805	SNP
Lib10^4_#1 50_Jm^2 Selection	TAG_BX_GATGTGTAGGGA	69	T	C	45	6	39	T/C	0.1333	SNP
Lib10^4_#1 50_Jm^2 Selection	TAG_BX_GATGTGTAGGGA	131	C	T	45	36	8	C/T	0.8	SNP
Lib10^4_#1 50_Jm^2 Selection	TAG_BX_GATTGCACATTC	130	C	T	69	51	17	C/T	0.7391	SNP
Lib10^4_#1 50_Jm^2 Selection	TAG_BX_GATTGGCAAGTT	131	C	T	97	74	21	C/T	0.7629	SNP
Lib10^4_#1 50_Jm^2 Selection	TAG_BX_GATTGTCTTGAT	131	C	T	102	80	17	C/T	0.7843	SNP
Lib10^4_#1 50_Jm^2 Selection	TAG_BX_GATTTTTGTTTC	118	G	A	86	70	16	G/A	0.814	SNP
Lib10^4_#1 50_Jm^2 Selection	TAG_BX_GCACACGGTATG	130	C	T	82	55	26	C/T	0.6707	SNP
Lib10^4_#1 50_Jm^2 Selection	TAG_BX_GCACTGAATATC	95	C	G	42	32	10	C/G	0.7619	SNP
Lib10^4_#1 50_Jm^2 Selection	TAG_BX_GCAGATGGAACT	118	G	A	88	75	12	G/A	0.8523	SNP
Lib10^4_#1 50_Jm^2 Selection	TAG_BX_GCAGGCTATAGA	118	G	A	72	64	8	G/A	0.8889	SNP
Lib10^4_#1 50_Jm^2 Selection	TAG_BX_GCAGGGTGCATC	118	G	A	17	2	15	G/A	0.1176	SNP
Lib10^4_#1 50_Jm^2 Selection	TAG_BX_GCAGGGTGCATC	5	G	A	17	14	3	G/A	0.8235	SNP
Lib10^4_#1 50_Jm^2 Selection	TAG_BX_GCAGGTTTCGGG	118	G	A	63	47	14	G/A	0.746	SNP
Lib10^4_#1 50_Jm^2 Selection	TAG_BX_GCAGGTTTCGGG	130	C	T	63	7	56	C/T	0.1111	SNP
Lib10^4_#1 50_Jm^2 Selection	TAG_BX_GCAGTGTGTGGT	121	G	A	70	56	13	G/A	0.8	SNP
Lib10^4_#1 50_Jm^2 Selection	TAG_BX_GCAGTGTGTGGT	118	G	A	70	8	61	G/A	0.1143	SNP
Lib10^4_#1 50_Jm^2 Selection	TAG_BX_GCATAATATTTA	118	G	A	79	62	15	G/A	0.7848	SNP
Lib10^4_#1 50_Jm^2 Selection	TAG_BX_GCATTCCGGTCG	118	G	A	29	4	25	G/A	0.1379	SNP
Lib10^4_#1 50_Jm^2 Selection	TAG_BX_GCATTCCGGTCG	5	G	A	29	22	7	G/A	0.7586	SNP
Lib10^4_#1 50_Jm^2 Selection	TAG_BX_GCCATCTATAAG	130	C	T	61	49	12	C/T	0.8033	SNP
Lib10^4_#1 50_Jm^2 Selection	TAG_BX_GCCCCTCTTGAG	5	G	A	28	26	2	G/A	0.9286	SNP
Lib10^4_#1 50_Jm^2 Selection	TAG_BX_GCCCCTCTTGAG	55	A	C	28	3	25	A/C	0.1071	SNP
Lib10^4_#1 50_Jm^2 Selection	TAG_BX_GCCGTTTGAGTA	121	G	A	31	26	5	G/A	0.8387	SNP
Lib10^4_#1 50_Jm^2 Selection	TAG_BX_GCCTTATTAGTA	131	C	T	50	39	11	C/T	0.78	SNP
Lib10^4_#1 50_Jm^2 Selection	TAG_BX_GCCTTCCTTTCT	5	G	A	19	18	1	G/A	0.9474	SNP
Lib10^4_#1 50_Jm^2 Selection	TAG_BX_GCGAATCTTCCA	130	C	T	38	32	6	C/T	0.8421	SNP
Lib10^4_#1 50_Jm^2 Selection	TAG_BX_GCGAGAGCTGAG	121	G	A	61	50	11	G/A	0.8197	SNP
Lib10^4_#1 50_Jm^2 Selection	TAG_BX_GCGAGTTTTTAC	131	C	T	40	35	5	C/T	0.875	SNP
Lib10^4_#1 50_Jm^2 Selection	TAG_BX_GCGCGCGATGAA	118	G	A	65	48	17	G/A	0.7385	SNP
Lib10^4_#1 50_Jm^2 Selection	TAG_BX_GCGGATTTAAGG	131	C	T	95	65	30	C/T	0.6842	SNP
Lib10^4_#1 50_Jm^2 Selection	TAG_BX_GCGGGGAGAGTT	121	G	A	55	45	10	G/A	0.8182	SNP
Lib10^4_#1 50_Jm^2 Selection	TAG_BX_GCGGGGGAAATG	130	C	T	238	24	54	C/T	0.1008	SNP
Lib10^4_#1 50_Jm^2 Selection	TAG_BX_GCGGGGTGCCTG	121	G	A	64	41	23	G/A	0.6406	SNP
Lib10^4_#1 50_Jm^2 Selection	TAG_BX_GCGGGTGTTAGG	121	G	A	39	29	10	G/A	0.7436	SNP
Lib10^4_#1 50_Jm^2 Selection	TAG_BX_GCGGTCTTCCAG	118	G	A	65	51	12	G/A	0.7846	SNP
Lib10^4_#1 50_Jm^2 Selection	TAG_BX_GCGTATGGAGCG	5	G	A	13	12	1	G/A	0.9231	SNP
Lib10^4_#1 50_Jm^2 Selection	TAG_BX_GCGTCGTTAGCT	130	C	T	97	18	15	C/T	0.1856	SNP
Lib10^4_#1 50_Jm^2 Selection	TAG_BX_GCGTGGTATTTC	101	C	G	18	13	4	C/G	0.7222	SNP
Lib10^4_#1 50_Jm^2 Selection	TAG_BX_GCGTTGGCCCAA	121	G	A	16	12	4	G/A	0.75	SNP
Lib10^4_#1 50_Jm^2 Selection	TAG_BX_GCGTTGGCCCAA	118	G	A	16	2	14	G/A	0.125	SNP
Lib10^4_#1 50_Jm^2 Selection	TAG_BX_GCGTTGGTTAGG	131	C	T	62	47	14	C/T	0.7581	SNP
Lib10^4_#1 50_Jm^2 Selection	TAG_BX_GCGTTGGTTCTT	118	G	A	66	55	11	G/A	0.8333	SNP
Lib10^4_#1 50_Jm^2 Selection	TAG_BX_GCTAGTGATTGT	85	G	A	54	47	6	G/A	0.8704	SNP
Lib10^4_#1 50_Jm^2 Selection	TAG_BX_GCTATTGTTTTA	130	C	T	87	70	16	C/T	0.8046	SNP
Lib10^4_#1 50_Jm^2 Selection	TAG_BX_GCTATTGTTTTA	69	T	C	87	11	75	T/C	0.1264	SNP
Lib10^4_#1 50_Jm^2 Selection	TAG_BX_GCTCATTGGAGA	118	G	A	18	2	16	G/A	0.1111	SNP
Lib10^4_#1 50_Jm^2 Selection	TAG_BX_GCTCATTGGAGA	5	G	A	18	15	3	G/A	0.8333	SNP
Lib10^4_#1 50_Jm^2 Selection	TAG_BX_GCTCTGATGTAC	118	G	A	179	139	35	G/A	0.7765	SNP
Lib10^4_#1 50_Jm^2 Selection	TAG_BX_GCTGCTTTTAGA	85	G	A	38	35	3	G/A	0.9211	SNP
Lib10^4_#1 50_Jm^2 Selection	TAG_BX_GCTGGCAGGCAA	130	C	T	26	23	3	C/T	0.8846	SNP
Lib10^4_#1 50_Jm^2 Selection	TAG_BX_GCTGTATACGGA	121	G	A	65	50	15	G/A	0.7692	SNP
Lib10^4_#1 50_Jm^2 Selection	TAG_BX_GCTTACGTATCT	95	C	A	70	60	10	C/A	0.8571	SNP
Lib10^4_#1 50_Jm^2 Selection	TAG_BX_GCTTAGGTTGAC	85	G	A	13	2	11	G/A	0.1538	SNP
Lib10^4_#1 50_Jm^2 Selection	TAG_BX_GCTTAGGTTGAC	5	G	A	13	12	1	G/A	0.9231	SNP
Lib10^4_#1 50_Jm^2 Selection	TAG_BX_GCTTCTCGTTCC	5	G	A	20	20	0	G/A	1	SNP
Lib10^4_#1 50_Jm^2 Selection	TAG_BX_GCTTTTTTGTTC	5	G	A	15	13	2	G/A	0.8667	SNP
Lib10^4_#1 50_Jm^2 Selection	TAG_BX_GCTTTTTTGTTC	118	G	A	15	3	12	G/A	0.2	SNP
Lib10^4_#1 50_Jm^2 Selection	TAG_BX_GGAAAATACTAT	85	G	A	117	101	14	G/A	0.8632	SNP
Lib10^4_#1 50_Jm^2 Selection	TAG_BX_GGACAGTACGTT	121	G	A	45	7	9	G/A	0.1556	SNP
Lib10^4_#1 50_Jm^2 Selection	TAG_BX_GGACATCGGTTG	131	C	T	49	35	12	C/T	0.7143	SNP
Lib10^4_#1 50_Jm^2 Selection	TAG_BX_GGAGGGCTTATT	121	G	A	199	152	46	G/A	0.7638	SNP
Lib10^4_#1 50_Jm^2 Selection	TAG_BX_GGATCCCCTACG	118	G	A	109	24	85	G/A	0.2202	SNP
Lib10^4_#1 50_Jm^2 Selection	TAG_BX_GGATCCCCTACG	130	C	T	109	53	56	C/T	0.4862	SNP
Lib10^4_#1 50_Jm^2 Selection	TAG_BX_GGATGACAGTCC	85	G	C	95	80	13	G/C	0.8421	SNP
Lib10^4_#1 50_Jm^2 Selection	TAG_BX_GGATTCTGAGGT	121	G	A	45	37	8	G/A	0.8222	SNP
Lib10^4_#1 50_Jm^2 Selection	TAG_BX_GGATTTTCCCTT	123	T	G	60	10	14	T/G	0.1667	SNP
Lib10^4_#1 50_Jm^2 Selection	TAG_BX_GGCAAACCATGT	85	G	A	79	65	12	G/A	0.8228	SNP
Lib10^4_#1 50_Jm^2 Selection	TAG_BX_GGCAAACGTCGG	131	C	T	40	30	8	C/T	0.75	SNP
Lib10^4_#1 50_Jm^2 Selection	TAG_BX_GGCATATGGTTC	118	G	A	83	69	13	G/A	0.8313	SNP
Lib10^4_#1 50_Jm^2 Selection	TAG_BX_GGCCAGTCGGTA	121	G	A	44	32	12	G/A	0.7273	SNP
Lib10^4_#1 50_Jm^2 Selection	TAG_BX_GGCCGTTTAATG	5	G	A	28	26	2	G/A	0.9286	SNP
Lib10^4_#1 50_Jm^2 Selection	TAG_BX_GGCCTCGCCGAG	5	G	A	17	17	0	G/A	1	SNP
Lib10^4_#1 50_Jm^2 Selection	TAG_BX_GGCGCTCATATG	121	G	A	111	20	15	G/A	0.1802	SNP
Lib10^4_#1 50_Jm^2 Selection	TAG_BX_GGCGGGCTCATG	121	G	A	79	12	10	G/A	0.1519	SNP
Lib10^4_#1 50_Jm^2 Selection	TAG_BX_GGCTAGCGTTGT	5	G	C	89	81	8	G/C	0.9101	SNP
Lib10^4_#1 50_Jm^2 Selection	TAG_BX_GGCTATAGCGTT	85	G	A	75	60	13	G/A	0.8	SNP
Lib10^4_#1 50_Jm^2 Selection	TAG_BX_GGCTATAGCGTT	118	G	A	75	8	67	G/A	0.1067	SNP
Lib10^4_#1 50_Jm^2 Selection	TAG_BX_GGCTCAATGCGA	118	G	A	49	36	11	G/A	0.7347	SNP
Lib10^4_#1 50_Jm^2 Selection	TAG_BX_GGCTCGCACGTA	118	G	A	54	46	8	G/A	0.8519	SNP
Lib10^4_#1 50_Jm^2 Selection	TAG_BX_GGCTGTCATCGG	121	G	A	66	8	6	G/A	0.1212	SNP
Lib10^4_#1 50_Jm^2 Selection	TAG_BX_GGCTTTTGTTCT	130	C	T	56	44	12	C/T	0.7857	SNP
Lib10^4_#1 50_Jm^2 Selection	TAG_BX_GGGAATCTTTTC	121	G	A	28	4	24	G/A	0.1429	SNP
Lib10^4_#1 50_Jm^2 Selection	TAG_BX_GGGAATCTTTTC	85	G	A	28	21	7	G/A	0.75	SNP
Lib10^4_#1 50_Jm^2 Selection	TAG_BX_GGGATCGTTAAT	118	G	A	67	54	13	G/A	0.806	SNP
Lib10^4_#1 50_Jm^2 Selection	TAG_BX_GGGCACAGTACT	118	G	A	72	8	62	G/A	0.1111	SNP
Lib10^4_#1 50_Jm^2 Selection	TAG_BX_GGGCCCTTTTCT	5	G	A	13	12	1	G/A	0.9231	SNP
Lib10^4_#1 50_Jm^2 Selection	TAG_BX_GGGCCGTAGCTG	118	G	A	45	32	12	G/A	0.7111	SNP
Lib10^4_#1 50_Jm^2 Selection	TAG_BX_GGGCGTTATGGA	131	C	T	47	33	14	C/T	0.7021	SNP
Lib10^4_#1 50_Jm^2 Selection	TAG_BX_GGGCTCCCCTTA	118	G	A	51	33	17	G/A	0.6471	SNP
Lib10^4_#1 50_Jm^2 Selection	TAG_BX_GGGCTCTCGTTT	131	C	T	71	57	12	C/T	0.8028	SNP
Lib10^4_#1 50_Jm^2 Selection	TAG_BX_GGGCTCTTTGAA	121	G	A	90	70	19	G/A	0.7778	SNP
Lib10^4_#1 50_Jm^2 Selection	TAG_BX_GGGCTGATTGGG	130	C	T	38	29	9	C/T	0.7632	SNP
Lib10^4_#1 50_Jm^2 Selection	TAG_BX_GGGCTTTCGGTT	68	T	C	67	46	11	T/C	0.6866	SNP
Lib10^4_#1 50_Jm^2 Selection	TAG_BX_GGGGCTAGGCGC	131	C	T	81	37	43	C/T	0.4568	SNP
Lib10^4_#1 50_Jm^2 Selection	TAG_BX_GGGGTGTACCTT	69	T	C	57	9	48	T/C	0.1579	SNP
Lib10^4_#1 50_Jm^2 Selection	TAG_BX_GGGGTGTACCTT	131	C	T	57	42	15	C/T	0.7368	SNP
Lib10^4_#1 50_Jm^2 Selection	TAG_BX_GGGGTTATTTGG	124	T	G	71	51	17	T/G	0.7183	SNP
Lib10^4_#1 50_Jm^2 Selection	TAG_BX_GGGTATGGGGGT	131	C	T	22	19	3	C/T	0.8636	SNP
Lib10^4_#1 50_Jm^2 Selection	TAG_BX_GGGTCCTTCCCG	118	G	A	75	66	9	G/A	0.88	SNP
Lib10^4_#1 50_Jm^2 Selection	TAG_BX_GGGTTATCGTGG	122	G	A	127	93	33	G/A	0.7323	SNP
Lib10^4_#1 50_Jm^2 Selection	TAG_BX_GGGTTGGCCGTT	130	C	T	138	109	28	C/T	0.7899	SNP
Lib10^4_#1 50_Jm^2 Selection	TAG_BX_GGGTTTTTTTTT	118	G	A	71	65	5	G/A	0.9155	SNP
Lib10^4_#1 50_Jm^2 Selection	TAG_BX_GGTAAGGATGGG	68	T	G	84	68	14	T/G	0.8095	SNP
Lib10^4_#1 50_Jm^2 Selection	TAG_BX_GGTACCACCGTG	5	G	A	54	47	7	G/A	0.8704	SNP
Lib10^4_#1 50_Jm^2 Selection	TAG_BX_GGTAGGCTCGGA	130	C	T	101	76	24	C/T	0.7525	SNP
Lib10^4_#1 50_Jm^2 Selection	TAG_BX_GGTATTTTTTAG	130	C	T	120	97	23	C/T	0.8083	SNP
Lib10^4_#1 50_Jm^2 Selection	TAG_BX_GGTCCAGTATGA	95	C	G	105	78	26	C/G	0.7429	SNP
Lib10^4_#1 50_Jm^2 Selection	TAG_BX_GGTCGCTGTTCA	118	G	A	88	73	15	G/A	0.8295	SNP
Lib10^4_#1 50_Jm^2 Selection	TAG_BX_GGTCGGGAGTAT	85	G	A	133	59	73	G/A	0.4436	SNP
Lib10^4_#1 50_Jm^2 Selection	TAG_BX_GGTCGGGAGTAT	118	G	A	133	52	80	G/A	0.391	SNP
Lib10^4_#1 50_Jm^2 Selection	TAG_BX_GGTCTAAGTGCT	118	G	A	102	85	14	G/A	0.8333	SNP
Lib10^4_#1 50_Jm^2 Selection	TAG_BX_GGTCTATCAGCC	130	C	T	77	55	17	C/T	0.7143	SNP
Lib10^4_#1 50_Jm^2 Selection	TAG_BX_GGTCTCTTTATT	121	G	A	85	67	18	G/A	0.7882	SNP
Lib10^4_#1 50_Jm^2 Selection	TAG_BX_GGTCTTTTTTGA	130	C	T	121	90	31	C/T	0.7438	SNP
Lib10^4_#1 50_Jm^2 Selection	TAG_BX_GGTGCGTTTGAT	122	G	A	51	37	13	G/A	0.7255	SNP
Lib10^4_#1 50_Jm^2 Selection	TAG_BX_GGTGGGTATTAA	5	G	A	128	23	104	G/A	0.1797	SNP
Lib10^4_#1 50_Jm^2 Selection	TAG_BX_GGTGTACGGCTT	121	G	A	114	85	28	G/A	0.7456	SNP
Lib10^4_#1 50_Jm^2 Selection	TAG_BX_GGTTATAGGGGT	118	G	A	59	48	10	G/A	0.8136	SNP
Lib10^4_#1 50_Jm^2 Selection	TAG_BX_GGTTGGGGTGCC	85	G	C	93	75	16	G/C	0.8065	SNP
Lib10^4_#1 50_Jm^2 Selection	TAG_BX_GGTTGGGTCCTA	5	G	A	25	21	4	G/A	0.84	SNP
Lib10^4_#1 50_Jm^2 Selection	TAG_BX_GGTTGGGTCCTA	131	C	T	25	3	21	C/T	0.12	SNP
Lib10^4_#1 50_Jm^2 Selection	TAG_BX_GGTTGTTTTCGA	130	C	G	71	55	14	C/G	0.7746	SNP
Lib10^4_#1 50_Jm^2 Selection	TAG_BX_GGTTTCTTCGAT	118	G	A	157	45	111	G/A	0.2866	SNP
Lib10^4_#1 50_Jm^2 Selection	TAG_BX_GGTTTCTTCGAT	130	C	T	157	80	75	C/T	0.5096	SNP
Lib10^4_#1 50_Jm^2 Selection	TAG_BX_GGTTTGACTTCT	121	G	A	155	24	131	G/A	0.1548	SNP
Lib10^4_#1 50_Jm^2 Selection	TAG_BX_GGTTTTACCTAA	85	G	A	66	58	8	G/A	0.8788	SNP
Lib10^4_#1 50_Jm^2 Selection	TAG_BX_GGTTTTCTCTAG	97	A	G	73	64	9	A/G	0.8767	SNP
Lib10^4_#1 50_Jm^2 Selection	TAG_BX_GTAACCACTGTT	85	G	A	104	80	20	G/A	0.7692	SNP
Lib10^4_#1 50_Jm^2 Selection	TAG_BX_GTAACGCCTCAC	118	G	A	43	32	10	G/A	0.7442	SNP
Lib10^4_#1 50_Jm^2 Selection	TAG_BX_GTAAGAGTTTTA	130	C	T	37	9	6	C/T	0.2432	SNP
Lib10^4_#1 50_Jm^2 Selection	TAG_BX_GTAATCATCAAA	85	G	A	61	54	7	G/A	0.8852	SNP
Lib10^4_#1 50_Jm^2 Selection	TAG_BX_GTACCGTCTTGT	85	G	A	55	45	10	G/A	0.8182	SNP
Lib10^4_#1 50_Jm^2 Selection	TAG_BX_GTACGCCGGGTT	130	C	T	65	7	7	C/T	0.1077	SNP
Lib10^4_#1 50_Jm^2 Selection	TAG_BX_GTACGTTCTCAA	5	G	C	91	83	4	G/C	0.9121	SNP
Lib10^4_#1 50_Jm^2 Selection	TAG_BX_GTAGATGAGGAT	131	C	T	37	31	6	C/T	0.8378	SNP
Lib10^4_#1 50_Jm^2 Selection	TAG_BX_GTAGATTTTTAG	131	C	T	32	29	3	C/T	0.9062	SNP
Lib10^4_#1 50_Jm^2 Selection	TAG_BX_GTAGCGCCCATG	121	G	A	84	64	20	G/A	0.7619	SNP
Lib10^4_#1 50_Jm^2 Selection	TAG_BX_GTAGGACCCCTA	118	G	A	17	3	14	G/A	0.1765	SNP
Lib10^4_#1 50_Jm^2 Selection	TAG_BX_GTAGGACCCCTA	5	G	A	17	15	2	G/A	0.8824	SNP
Lib10^4_#1 50_Jm^2 Selection	TAG_BX_GTAGGGGTATGT	118	G	A	69	51	17	G/A	0.7391	SNP
Lib10^4_#1 50_Jm^2 Selection	TAG_BX_GTAGTCGCCTAA	-12	C	G	31	31	0	C/G	1	SNP
Lib10^4_#1 50_Jm^2 Selection	TAG_BX_GTAGTGCTAGTT	118	G	A	41	32	9	G/A	0.7805	SNP
Lib10^4_#1 50_Jm^2 Selection	TAG_BX_GTATAGGCTCTT	5	G	C	38	35	3	G/C	0.9211	SNP
Lib10^4_#1 50_Jm^2 Selection	TAG_BX_GTATATATTTGG	95	C	G	53	43	10	C/G	0.8113	SNP
Lib10^4_#1 50_Jm^2 Selection	TAG_BX_GTATCGAAGCCT	95	C	G	50	44	5	C/G	0.88	SNP
Lib10^4_#1 50_Jm^2 Selection	TAG_BX_GTATCTTGAGGT	131	C	T	38	31	7	C/T	0.8158	SNP
Lib10^4_#1 50_Jm^2 Selection	TAG_BX_GTATTCGGGACC	85	G	A	107	91	15	G/A	0.8505	SNP
Lib10^4_#1 50_Jm^2 Selection	TAG_BX_GTATTGTTACTG	121	G	A	33	28	4	G/A	0.8485	SNP
Lib10^4_#1 50_Jm^2 Selection	TAG_BX_GTCAACTAGGCA	131	C	T	62	21	39	C/T	0.3387	SNP
Lib10^4_#1 50_Jm^2 Selection	TAG_BX_GTCAACTAGGCA	118	G	A	62	32	29	G/A	0.5161	SNP
Lib10^4_#1 50_Jm^2 Selection	TAG_BX_GTCAATAAGTCC	118	G	A	119	100	18	G/A	0.8403	SNP
Lib10^4_#1 50_Jm^2 Selection	TAG_BX_GTCAGCATTTGG	122	G	A	54	42	11	G/A	0.7778	SNP
Lib10^4_#1 50_Jm^2 Selection	TAG_BX_GTCATAAGGTTG	122	G	A	53	45	7	G/A	0.8491	SNP
Lib10^4_#1 50_Jm^2 Selection	TAG_BX_GTCATGGTAGTT	121	G	A	113	87	25	G/A	0.7699	SNP
Lib10^4_#1 50_Jm^2 Selection	TAG_BX_GTCCCATACGAG	122	G	A	47	35	12	G/A	0.7447	SNP
Lib10^4_#1 50_Jm^2 Selection	TAG_BX_GTCGATATCTTC	121	G	A	100	77	22	G/A	0.77	SNP
Lib10^4_#1 50_Jm^2 Selection	TAG_BX_GTCGCAGAGCTG	117	C	T	13	8	5	C/T	0.6154	SNP
Lib10^4_#1 50_Jm^2 Selection	TAG_BX_GTCGCTTGGGGT	5	G	A	13	12	1	G/A	0.9231	SNP
Lib10^4_#1 50_Jm^2 Selection	TAG_BX_GTCGCTTGGGGT	118	G	A	13	2	11	G/A	0.1538	SNP
Lib10^4_#1 50_Jm^2 Selection	TAG_BX_GTCGCTTGGGGT	55	A	C	13	2	11	A/C	0.1538	SNP
Lib10^4_#1 50_Jm^2 Selection	TAG_BX_GTCGTCTGTTTA	121	G	A	81	64	17	G/A	0.7901	SNP
Lib10^4_#1 50_Jm^2 Selection	TAG_BX_GTCGTTCTTGCG	130	C	T	34	27	6	C/T	0.7941	SNP
Lib10^4_#1 50_Jm^2 Selection	TAG_BX_GTCTCGTCTAGG	69	T	C	31	5	26	T/C	0.1613	SNP
Lib10^4_#1 50_Jm^2 Selection	TAG_BX_GTCTCGTCTAGG	130	C	T	38	6	3	C/T	0.1579	SNP
Lib10^4_#1 50_Jm^2 Selection	TAG_BX_GTCTGCTGTGGC	130	C	T	46	35	9	C/T	0.7609	SNP
Lib10^4_#1 50_Jm^2 Selection	TAG_BX_GTCTTTACACTG	130	C	T	29	3	26	C/T	0.1034	SNP
Lib10^4_#1 50_Jm^2 Selection	TAG_BX_GTCTTTACACTG	118	G	A	29	24	5	G/A	0.8276	SNP
Lib10^4_#1 50_Jm^2 Selection	TAG_BX_GTGACCACACTC	52	A	T	17	2	15	A/T	0.1176	SNP
Lib10^4_#1 50_Jm^2 Selection	TAG_BX_GTGACCACACTC	5	G	A	17	14	3	G/A	0.8235	SNP
Lib10^4_#1 50_Jm^2 Selection	TAG_BX_GTGACCACACTC	69	T	C	17	3	13	T/C	0.1765	SNP
Lib10^4_#1 50_Jm^2 Selection	TAG_BX_GTGACCACACTC	121	G	A	17	3	14	G/A	0.1765	SNP
Lib10^4_#1 50_Jm^2 Selection	TAG_BX_GTGACCATCTGT	131	C	T	93	69	23	C/T	0.7419	SNP
Lib10^4_#1 50_Jm^2 Selection	TAG_BX_GTGAGGAGTGTG	131	C	T	54	40	13	C/T	0.7407	SNP
Lib10^4_#1 50_Jm^2 Selection	TAG_BX_GTGCCTTGTATT	130	C	T	30	25	5	C/T	0.8333	SNP
Lib10^4_#1 50_Jm^2 Selection	TAG_BX_GTGCGGTTCGGC	5	G	A	12	11	1	G/A	0.9167	SNP
Lib10^4_#1 50_Jm^2 Selection	TAG_BX_GTGCGGTTCGGC	121	G	A	12	2	10	G/A	0.1667	SNP
Lib10^4_#1 50_Jm^2 Selection	TAG_BX_GTGCTCCCAACA	121	G	A	30	4	8	G/A	0.1333	SNP
Lib10^4_#1 50_Jm^2 Selection	TAG_BX_GTGCTCCCTGTG	130	C	T	129	93	31	C/T	0.7209	SNP
Lib10^4_#1 50_Jm^2 Selection	TAG_BX_GTGCTGTGTGAG	118	G	A	46	6	40	G/A	0.1304	SNP
Lib10^4_#1 50_Jm^2 Selection	TAG_BX_GTGCTGTGTGAG	131	C	T	46	28	17	C/T	0.6087	SNP
Lib10^4_#1 50_Jm^2 Selection	TAG_BX_GTGGCGTGAGGT	118	G	A	107	83	24	G/A	0.7757	SNP
Lib10^4_#1 50_Jm^2 Selection	TAG_BX_GTGGGAATGTGT	118	G	A	54	45	9	G/A	0.8333	SNP
Lib10^4_#1 50_Jm^2 Selection	TAG_BX_GTGGGATAACCG	95	C	G	214	107	107	C/G	0.5	SNP
Lib10^4_#1 50_Jm^2 Selection	TAG_BX_GTGGGATAACCG	131	C	T	214	36	176	C/T	0.1682	SNP
Lib10^4_#1 50_Jm^2 Selection	TAG_BX_GTGTACAGACTT	118	G	A	53	40	12	G/A	0.7547	SNP
Lib10^4_#1 50_Jm^2 Selection	TAG_BX_GTGTAGGGTAAC	131	C	T	27	22	5	C/T	0.8148	SNP
Lib10^4_#1 50_Jm^2 Selection	TAG_BX_GTGTCTCGCCGG	5	G	A	27	26	1	G/A	0.963	SNP
Lib10^4_#1 50_Jm^2 Selection	TAG_BX_GTGTCTGTCATT	130	C	T	180	139	40	C/T	0.7722	SNP
Lib10^4_#1 50_Jm^2 Selection	TAG_BX_GTGTGGCTGTGT	121	G	A	124	98	25	G/A	0.7903	SNP
Lib10^4_#1 50_Jm^2 Selection	TAG_BX_GTGTGGTAGGTC	5	G	A	36	30	5	G/A	0.8333	SNP
Lib10^4_#1 50_Jm^2 Selection	TAG_BX_GTGTTAGTCTTT	85	G	A	77	70	7	G/A	0.9091	SNP
Lib10^4_#1 50_Jm^2 Selection	TAG_BX_GTGTTATGCCAT	85	G	A	92	81	9	G/A	0.8804	SNP
Lib10^4_#1 50_Jm^2 Selection	TAG_BX_GTGTTTGCCGGA	118	G	A	71	55	16	G/A	0.7746	SNP
Lib10^4_#1 50_Jm^2 Selection	TAG_BX_GTGTTTGTGTCT	126	G	C	54	37	17	G/C	0.6852	SNP
Lib10^4_#1 50_Jm^2 Selection	TAG_BX_GTGTTTTTGGGT	74	A	C	75	58	16	A/C	0.7733	SNP
Lib10^4_#1 50_Jm^2 Selection	TAG_BX_GTTAAGGGTGAG	118	G	A	45	36	9	G/A	0.8	SNP
Lib10^4_#1 50_Jm^2 Selection	TAG_BX_GTTACTGTGCTT	130	C	T	84	19	12	C/T	0.2262	SNP
Lib10^4_#1 50_Jm^2 Selection	TAG_BX_GTTATGTCTGCA	5	G	A	22	21	1	G/A	0.9545	SNP
Lib10^4_#1 50_Jm^2 Selection	TAG_BX_GTTCCATGCGCC	5	G	A	39	35	4	G/A	0.8974	SNP
Lib10^4_#1 50_Jm^2 Selection	TAG_BX_GTTCGGACTAGA	130	C	T	77	58	18	C/T	0.7532	SNP
Lib10^4_#1 50_Jm^2 Selection	TAG_BX_GTTCGTATCACT	12	T	C	43	34	8	T/C	0.7907	SNP
Lib10^4_#1 50_Jm^2 Selection	TAG_BX_GTTCGTATTGAT	121	G	A	80	63	17	G/A	0.7875	SNP
Lib10^4_#1 50_Jm^2 Selection	TAG_BX_GTTCTTCATCCC	85	G	A	32	27	5	G/A	0.8438	SNP
Lib10^4_#1 50_Jm^2 Selection	TAG_BX_GTTCTTTGGCCA	118	G	A	35	28	7	G/A	0.8	SNP
Lib10^4_#1 50_Jm^2 Selection	TAG_BX_GTTGCCACCTGT	5	G	A	17	17	0	G/A	1	SNP
Lib10^4_#1 50_Jm^2 Selection	TAG_BX_GTTGGCTCGGAT	130	C	T	109	79	30	C/T	0.7248	SNP
Lib10^4_#1 50_Jm^2 Selection	TAG_BX_GTTGGTATCGGG	5	G	A	17	15	2	G/A	0.8824	SNP
Lib10^4_#1 50_Jm^2 Selection	TAG_BX_GTTGTAAGGTTT	5	G	A	23	21	2	G/A	0.913	SNP
Lib10^4_#1 50_Jm^2 Selection	TAG_BX_GTTGTAAGGTTT	121	G	A	23	4	19	G/A	0.1739	SNP
Lib10^4_#1 50_Jm^2 Selection	TAG_BX_GTTGTTCTTTGG	118	G	A	125	26	99	G/A	0.208	SNP
Lib10^4_#1 50_Jm^2 Selection	TAG_BX_GTTGTTCTTTGG	85	G	A	125	86	37	G/A	0.688	SNP
Lib10^4_#1 50_Jm^2 Selection	TAG_BX_GTTTAAGAGGTG	118	G	A	40	5	35	G/A	0.125	SNP
Lib10^4_#1 50_Jm^2 Selection	TAG_BX_GTTTAGCAACTT	85	G	A	49	43	5	G/A	0.8776	SNP
Lib10^4_#1 50_Jm^2 Selection	TAG_BX_GTTTAGCAACTT	69	T	C	49	6	40	T/C	0.1224	SNP
Lib10^4_#1 50_Jm^2 Selection	TAG_BX_GTTTAGCTAAAG	130	C	T	107	84	23	C/T	0.785	SNP
Lib10^4_#1 50_Jm^2 Selection	TAG_BX_GTTTATTCCGCG	121	G	A	13	3	10	G/A	0.2308	SNP
Lib10^4_#1 50_Jm^2 Selection	TAG_BX_GTTTATTCCGCG	5	G	A	13	12	1	G/A	0.9231	SNP
Lib10^4_#1 50_Jm^2 Selection	TAG_BX_GTTTCAATATAA	118	G	A	41	35	6	G/A	0.8537	SNP
Lib10^4_#1 50_Jm^2 Selection	TAG_BX_GTTTCATCTTTT	5	G	A	27	23	4	G/A	0.8519	SNP
Lib10^4_#1 50_Jm^2 Selection	TAG_BX_GTTTCCACTCGT	5	G	C	41	38	3	G/C	0.9268	SNP
Lib10^4_#1 50_Jm^2 Selection	TAG_BX_GTTTCGTTTTCC	85	G	A	101	84	16	G/A	0.8317	SNP
Lib10^4_#1 50_Jm^2 Selection	TAG_BX_GTTTGAGTGAAT	130	C	T	59	42	17	C/T	0.7119	SNP
Lib10^4_#1 50_Jm^2 Selection	TAG_BX_GTTTTCAGGCTT	85	G	A	31	23	7	G/A	0.7419	SNP
Lib10^4_#1 50_Jm^2 Selection	TAG_BX_TAAAGAAGCGCC	85	G	A	26	20	5	G/A	0.7692	SNP
Lib10^4_#1 50_Jm^2 Selection	TAG_BX_TAACGCCAGAGA	86	G	C	64	52	11	G/C	0.8125	SNP
Lib10^4_#1 50_Jm^2 Selection	TAG_BX_TAACGTTTTTTG	118	G	A	58	44	12	G/A	0.7586	SNP
Lib10^4_#1 50_Jm^2 Selection	TAG_BX_TAATACTATTTA	85	G	A	41	28	13	G/A	0.6829	SNP
Lib10^4_#1 50_Jm^2 Selection	TAG_BX_TAATTCTATCAG	118	G	A	30	24	6	G/A	0.8	SNP
Lib10^4_#1 50_Jm^2 Selection	TAG_BX_TACACGATTTCG	5	G	A	37	32	5	G/A	0.8649	SNP
Lib10^4_#1 50_Jm^2 Selection	TAG_BX_TACACGTCAGTG	131	C	T	130	97	31	C/T	0.7462	SNP
Lib10^4_#1 50_Jm^2 Selection	TAG_BX_TACCCTAGTTAC	121	G	A	99	80	17	G/A	0.8081	SNP
Lib10^4_#1 50_Jm^2 Selection	TAG_BX_TACCCTGGGCTA	118	G	A	69	50	19	G/A	0.7246	SNP
Lib10^4_#1 50_Jm^2 Selection	TAG_BX_TACCTTTGTTTT	131	C	T	74	57	15	C/T	0.7703	SNP
Lib10^4_#1 50_Jm^2 Selection	TAG_BX_TACCTTTGTTTT	69	T	C	74	8	65	T/C	0.1081	SNP
Lib10^4_#1 50_Jm^2 Selection	TAG_BX_TACGAGCCTTGT	130	C	T	84	66	18	C/T	0.7857	SNP
Lib10^4_#1 50_Jm^2 Selection	TAG_BX_TACGGTGCATGA	55	A	C	44	5	38	A/C	0.1136	SNP
Lib10^4_#1 50_Jm^2 Selection	TAG_BX_TACGGTGCATGA	118	G	A	44	34	9	G/A	0.7727	SNP
Lib10^4_#1 50_Jm^2 Selection	TAG_BX_TACGTCAGCGCC	101	C	A	22	18	4	C/A	0.8182	SNP
Lib10^4_#1 50_Jm^2 Selection	TAG_BX_TACTGTGTATAA	85	G	A	71	59	10	G/A	0.831	SNP
Lib10^4_#1 50_Jm^2 Selection	TAG_BX_TACTGTTGCTTG	118	G	A	20	16	4	G/A	0.8	SNP
Lib10^4_#1 50_Jm^2 Selection	TAG_BX_TACTTACAAGTT	118	G	A	53	45	7	G/A	0.8491	SNP
Lib10^4_#1 50_Jm^2 Selection	TAG_BX_TACTTGCATTAT	118	G	A	55	46	8	G/A	0.8364	SNP
Lib10^4_#1 50_Jm^2 Selection	TAG_BX_TACTTGTTGGTC	118	G	A	114	98	15	G/A	0.8596	SNP
Lib10^4_#1 50_Jm^2 Selection	TAG_BX_TACTTTTTGAGT	121	G	A	135	23	32	G/A	0.1704	SNP
Lib10^4_#1 50_Jm^2 Selection	TAG_BX_TAGAACTTCTAT	131	C	T	77	58	19	C/T	0.7532	SNP
Lib10^4_#1 50_Jm^2 Selection	TAG_BX_TAGGAAATGTGC	118	G	A	77	58	18	G/A	0.7532	SNP
Lib10^4_#1 50_Jm^2 Selection	TAG_BX_TAGGGAAGTGTT	118	G	A	146	15	131	G/A	0.1027	SNP
Lib10^4_#1 50_Jm^2 Selection	TAG_BX_TAGTACAAGCGA	122	G	A	24	17	6	G/A	0.7083	SNP
Lib10^4_#1 50_Jm^2 Selection	TAG_BX_TAGTACAAGCGA	118	G	A	24	3	21	G/A	0.125	SNP
Lib10^4_#1 50_Jm^2 Selection	TAG_BX_TAGTCAAGCATC	85	G	A	30	27	3	G/A	0.9	SNP
Lib10^4_#1 50_Jm^2 Selection	TAG_BX_TAGTCGGCGGTA	118	G	A	12	9	3	G/A	0.75	SNP
Lib10^4_#1 50_Jm^2 Selection	TAG_BX_TAGTCTGCAGGG	118	G	A	116	89	27	G/A	0.7672	SNP
Lib10^4_#1 50_Jm^2 Selection	TAG_BX_TAGTGGTTTGGA	134	C	A	28	19	9	C/A	0.6786	SNP
Lib10^4_#1 50_Jm^2 Selection	TAG_BX_TAGTGGTTTGGA	130	C	T	28	3	25	C/T	0.1071	SNP
Lib10^4_#1 50_Jm^2 Selection	TAG_BX_TAGTGTATTTGG	95	C	G	40	33	7	C/G	0.825	SNP
Lib10^4_#1 50_Jm^2 Selection	TAG_BX_TAGTTCCCGGGC	118	G	A	26	25	1	G/A	0.9615	SNP
Lib10^4_#1 50_Jm^2 Selection	TAG_BX_TAGTTTATCTTG	121	G	A	30	23	7	G/A	0.7667	SNP
Lib10^4_#1 50_Jm^2 Selection	TAG_BX_TATACCCAGTAA	131	C	T	59	41	18	C/T	0.6949	SNP
Lib10^4_#1 50_Jm^2 Selection	TAG_BX_TATAGCTGCTAT	130	C	T	18	11	6	C/T	0.6111	SNP
Lib10^4_#1 50_Jm^2 Selection	TAG_BX_TATAGCTGCTAT	118	G	A	18	3	15	G/A	0.1667	SNP
Lib10^4_#1 50_Jm^2 Selection	TAG_BX_TATATCTTGTAA	5	G	A	48	17	31	G/A	0.3542	SNP
Lib10^4_#1 50_Jm^2 Selection	TAG_BX_TATATCTTGTAA	130	C	T	48	24	24	C/T	0.5	SNP
Lib10^4_#1 50_Jm^2 Selection	TAG_BX_TATATGAACTAA	121	G	A	57	35	21	G/A	0.614	SNP
Lib10^4_#1 50_Jm^2 Selection	TAG_BX_TATATGAACTAA	118	G	A	57	7	49	G/A	0.1228	SNP
Lib10^4_#1 50_Jm^2 Selection	TAG_BX_TATCACCGTTAA	130	C	T	46	6	39	C/T	0.1304	SNP
Lib10^4_#1 50_Jm^2 Selection	TAG_BX_TATCACCGTTAA	5	G	C	46	42	4	G/C	0.913	SNP
Lib10^4_#1 50_Jm^2 Selection	TAG_BX_TATCCATTCATA	131	C	T	135	102	31	C/T	0.7556	SNP
Lib10^4_#1 50_Jm^2 Selection	TAG_BX_TATCCCATGCCT	5	G	A	37	32	5	G/A	0.8649	SNP
Lib10^4_#1 50_Jm^2 Selection	TAG_BX_TATCCCGTGTAT	121	G	A	106	85	20	G/A	0.8019	SNP
Lib10^4_#1 50_Jm^2 Selection	TAG_BX_TATCCTAACACT	121	G	A	67	55	12	G/A	0.8209	SNP
Lib10^4_#1 50_Jm^2 Selection	TAG_BX_TATCTATGTTTT	118	G	A	66	50	16	G/A	0.7576	SNP
Lib10^4_#1 50_Jm^2 Selection	TAG_BX_TATCTGGTTATT	95	C	G	42	34	8	C/G	0.8095	SNP
Lib10^4_#1 50_Jm^2 Selection	TAG_BX_TATGACTCAGGG	121	G	A	134	24	24	G/A	0.1791	SNP
Lib10^4_#1 50_Jm^2 Selection	TAG_BX_TATGAGAGAGAT	130	C	T	126	29	96	C/T	0.2302	SNP
Lib10^4_#1 50_Jm^2 Selection	TAG_BX_TATGGAAGTGCT	130	C	T	38	27	10	C/T	0.7105	SNP
Lib10^4_#1 50_Jm^2 Selection	TAG_BX_TATGGGTCAGTT	5	G	A	63	12	51	G/A	0.1905	SNP
Lib10^4_#1 50_Jm^2 Selection	TAG_BX_TATGGGTCAGTT	118	G	A	63	38	25	G/A	0.6032	SNP
Lib10^4_#1 50_Jm^2 Selection	TAG_BX_TATGTTATACTT	85	G	A	75	64	10	G/A	0.8533	SNP
Lib10^4_#1 50_Jm^2 Selection	TAG_BX_TATGTTGAAAGA	69	T	C	48	5	43	T/C	0.1042	SNP
Lib10^4_#1 50_Jm^2 Selection	TAG_BX_TATGTTGAAAGA	95	C	G	48	35	13	C/G	0.7292	SNP
Lib10^4_#1 50_Jm^2 Selection	TAG_BX_TATTACTATGTT	118	G	A	31	25	6	G/A	0.8065	SNP
Lib10^4_#1 50_Jm^2 Selection	TAG_BX_TATTATCCTTAC	130	C	T	31	27	4	C/T	0.871	SNP
Lib10^4_#1 50_Jm^2 Selection	TAG_BX_TATTATGATATC	131	C	T	55	44	11	C/T	0.8	SNP
Lib10^4_#1 50_Jm^2 Selection	TAG_BX_TATTCAAATGGA	122	G	A	66	46	20	G/A	0.697	SNP
Lib10^4_#1 50_Jm^2 Selection	TAG_BX_TATTGCGAATTG	121	G	A	60	6	13	G/A	0.1	SNP
Lib10^4_#1 50_Jm^2 Selection	TAG_BX_TATTGCTTGCTG	5	G	A	58	53	4	G/A	0.9138	SNP
Lib10^4_#1 50_Jm^2 Selection	TAG_BX_TATTGGGTGGAC	5	G	C	53	47	6	G/C	0.8868	SNP
Lib10^4_#1 50_Jm^2 Selection	TAG_BX_TATTTGCCAGGC	121	G	A	47	36	10	G/A	0.766	SNP
Lib10^4_#1 50_Jm^2 Selection	TAG_BX_TATTTTGTTTCG	118	G	A	70	61	9	G/A	0.8714	SNP
Lib10^4_#1 50_Jm^2 Selection	TAG_BX_TCAATACGGTTT	95	C	G	36	32	4	C/G	0.8889	SNP
Lib10^4_#1 50_Jm^2 Selection	TAG_BX_TCAATAGGGAAT	130	C	T	85	12	16	C/T	0.1412	SNP
Lib10^4_#1 50_Jm^2 Selection	TAG_BX_TCAATCGGTGAA	131	C	T	79	58	20	C/T	0.7342	SNP
Lib10^4_#1 50_Jm^2 Selection	TAG_BX_TCACGGCTCTAT	121	G	A	230	31	41	G/A	0.1348	SNP
Lib10^4_#1 50_Jm^2 Selection	TAG_BX_TCACGTTCAGCT	121	G	A	107	84	21	G/A	0.785	SNP
Lib10^4_#1 50_Jm^2 Selection	TAG_BX_TCAGTTTGCATG	118	G	A	88	71	16	G/A	0.8068	SNP
Lib10^4_#1 50_Jm^2 Selection	TAG_BX_TCATAGTCATCT	131	C	T	149	39	108	C/T	0.2617	SNP
Lib10^4_#1 50_Jm^2 Selection	TAG_BX_TCATAGTCATCT	118	G	A	149	85	64	G/A	0.5705	SNP
Lib10^4_#1 50_Jm^2 Selection	TAG_BX_TCATCCTTCAGA	131	C	T	38	27	10	C/T	0.7105	SNP
Lib10^4_#1 50_Jm^2 Selection	TAG_BX_TCATCGTCGCGG	130	C	T	97	77	18	C/T	0.7938	SNP
Lib10^4_#1 50_Jm^2 Selection	TAG_BX_TCATTTACGGTA	131	C	T	82	63	17	C/T	0.7683	SNP
Lib10^4_#1 50_Jm^2 Selection	TAG_BX_TCATTTTTATCA	-12	C	G	12	11	1	C/G	0.9167	SNP
Lib10^4_#1 50_Jm^2 Selection	TAG_BX_TCCATCTACCAA	85	G	A	68	59	9	G/A	0.8676	SNP
Lib10^4_#1 50_Jm^2 Selection	TAG_BX_TCCATGGGGAGC	118	G	A	76	62	12	G/A	0.8158	SNP
Lib10^4_#1 50_Jm^2 Selection	TAG_BX_TCCATGTCATAG	130	C	T	216	143	71	C/T	0.662	SNP
Lib10^4_#1 50_Jm^2 Selection	TAG_BX_TCCCTGCACAAC	95	C	G	38	32	6	C/G	0.8421	SNP
Lib10^4_#1 50_Jm^2 Selection	TAG_BX_TCCCTTCCCACT	131	C	T	60	50	10	C/T	0.8333	SNP
Lib10^4_#1 50_Jm^2 Selection	TAG_BX_TCCCTTTGTTGT	121	G	A	51	38	12	G/A	0.7451	SNP
Lib10^4_#1 50_Jm^2 Selection	TAG_BX_TCCGATCATCGC	131	C	T	44	36	8	C/T	0.8182	SNP
Lib10^4_#1 50_Jm^2 Selection	TAG_BX_TCCGCGCTTACC	118	G	A	43	34	7	G/A	0.7907	SNP
Lib10^4_#1 50_Jm^2 Selection	TAG_BX_TCCGGCGATCTG	130	C	T	165	22	21	C/T	0.1333	SNP
Lib10^4_#1 50_Jm^2 Selection	TAG_BX_TCCGGTCCTTAC	131	C	T	30	26	2	C/T	0.8667	SNP
Lib10^4_#1 50_Jm^2 Selection	TAG_BX_TCCGTGCGCTGT	130	C	T	67	57	10	C/T	0.8507	SNP
Lib10^4_#1 50_Jm^2 Selection	TAG_BX_TCCGTTTTTGCT	118	G	A	44	37	6	G/A	0.8409	SNP
Lib10^4_#1 50_Jm^2 Selection	TAG_BX_TCCTACTGGCAT	118	G	A	23	19	4	G/A	0.8261	SNP
Lib10^4_#1 50_Jm^2 Selection	TAG_BX_TCCTATCTGTGC	130	C	T	47	34	11	C/T	0.7234	SNP
Lib10^4_#1 50_Jm^2 Selection	TAG_BX_TCCTCAATTCGA	5	G	C	95	88	7	G/C	0.9263	SNP
Lib10^4_#1 50_Jm^2 Selection	TAG_BX_TCCTCGTCCTCT	85	G	A	51	44	7	G/A	0.8627	SNP
Lib10^4_#1 50_Jm^2 Selection	TAG_BX_TCCTGCACTTGG	118	G	A	183	147	34	G/A	0.8033	SNP
Lib10^4_#1 50_Jm^2 Selection	TAG_BX_TCCTGCGATGTA	118	G	A	69	51	18	G/A	0.7391	SNP
Lib10^4_#1 50_Jm^2 Selection	TAG_BX_TCCTGGGCGACT	131	C	T	83	60	23	C/T	0.7229	SNP
Lib10^4_#1 50_Jm^2 Selection	TAG_BX_TCCTGTGTGCTC	121	G	A	113	89	22	G/A	0.7876	SNP
Lib10^4_#1 50_Jm^2 Selection	TAG_BX_TCCTTCTACTTC	85	G	A	47	36	9	G/A	0.766	SNP
Lib10^4_#1 50_Jm^2 Selection	TAG_BX_TCCTTGCAGCCT	118	G	A	24	4	20	G/A	0.1667	SNP
Lib10^4_#1 50_Jm^2 Selection	TAG_BX_TCCTTTGGCCCT	5	G	A	37	34	3	G/A	0.9189	SNP
Lib10^4_#1 50_Jm^2 Selection	TAG_BX_TCGACACCTTTA	118	G	A	34	27	7	G/A	0.7941	SNP
Lib10^4_#1 50_Jm^2 Selection	TAG_BX_TCGACGTTTTGT	118	G	A	78	64	14	G/A	0.8205	SNP
Lib10^4_#1 50_Jm^2 Selection	TAG_BX_TCGATGCAGTCA	5	G	A	62	60	2	G/A	0.9677	SNP
Lib10^4_#1 50_Jm^2 Selection	TAG_BX_TCGATGCCGGGC	122	G	A	62	46	16	G/A	0.7419	SNP
Lib10^4_#1 50_Jm^2 Selection	TAG_BX_TCGATTCCGACG	5	G	A	15	14	1	G/A	0.9333	SNP
Lib10^4_#1 50_Jm^2 Selection	TAG_BX_TCGATTCTGCGT	5	G	C	63	57	6	G/C	0.9048	SNP
Lib10^4_#1 50_Jm^2 Selection	TAG_BX_TCGCATGGGATG	5	G	C	75	29	46	G/C	0.3867	SNP
Lib10^4_#1 50_Jm^2 Selection	TAG_BX_TCGCCGGGCATG	85	G	A	82	67	13	G/A	0.8171	SNP
Lib10^4_#1 50_Jm^2 Selection	TAG_BX_TCGGATCGTAGT	5	G	A	18	15	3	G/A	0.8333	SNP
Lib10^4_#1 50_Jm^2 Selection	TAG_BX_TCGGATTCGAGG	85	G	A	50	43	5	G/A	0.86	SNP
Lib10^4_#1 50_Jm^2 Selection	TAG_BX_TCGGCCTTCCGG	121	G	T	25	21	4	G/T	0.84	SNP
Lib10^4_#1 50_Jm^2 Selection	TAG_BX_TCGGGGTTCAGA	131	C	T	99	76	20	C/T	0.7677	SNP
Lib10^4_#1 50_Jm^2 Selection	TAG_BX_TCGGTAGTGCCT	85	G	A	80	74	6	G/A	0.925	SNP
Lib10^4_#1 50_Jm^2 Selection	TAG_BX_TCGTACCTTGGT	5	G	A	31	30	1	G/A	0.9677	SNP
Lib10^4_#1 50_Jm^2 Selection	TAG_BX_TCGTATAAGACC	69	T	C	15	2	13	T/C	0.1333	SNP
Lib10^4_#1 50_Jm^2 Selection	TAG_BX_TCGTATAAGACC	55	A	C	15	2	13	A/C	0.1333	SNP
Lib10^4_#1 50_Jm^2 Selection	TAG_BX_TCGTATAAGACC	5	G	A	15	14	1	G/A	0.9333	SNP
Lib10^4_#1 50_Jm^2 Selection	TAG_BX_TCGTGGGGGGCT	130	C	T	152	109	43	C/T	0.7171	SNP
Lib10^4_#1 50_Jm^2 Selection	TAG_BX_TCGTGTCGGTAT	118	G	A	49	37	12	G/A	0.7551	SNP
Lib10^4_#1 50_Jm^2 Selection	TAG_BX_TCGTTAGTCCAT	5	G	A	28	25	3	G/A	0.8929	SNP
Lib10^4_#1 50_Jm^2 Selection	TAG_BX_TCGTTCTGTGGC	118	G	A	137	102	34	G/A	0.7445	SNP
Lib10^4_#1 50_Jm^2 Selection	TAG_BX_TCGTTGGTCTGC	5	G	A	53	48	4	G/A	0.9057	SNP
Lib10^4_#1 50_Jm^2 Selection	TAG_BX_TCGTTGGTTGCC	85	G	A	13	2	11	G/A	0.1538	SNP
Lib10^4_#1 50_Jm^2 Selection	TAG_BX_TCGTTGGTTGCC	5	G	A	13	12	1	G/A	0.9231	SNP
Lib10^4_#1 50_Jm^2 Selection	TAG_BX_TCGTTTGTGGGG	85	G	A	86	72	12	G/A	0.8372	SNP
Lib10^4_#1 50_Jm^2 Selection	TAG_BX_TCTACGACGCCT	5	G	A	17	16	1	G/A	0.9412	SNP
Lib10^4_#1 50_Jm^2 Selection	TAG_BX_TCTATCCTTTAT	118	G	C	31	22	7	G/C	0.7097	SNP
Lib10^4_#1 50_Jm^2 Selection	TAG_BX_TCTATCTGTCTT	118	G	A	58	42	15	G/A	0.7241	SNP
Lib10^4_#1 50_Jm^2 Selection	TAG_BX_TCTCAACATCTG	118	G	A	50	39	10	G/A	0.78	SNP
Lib10^4_#1 50_Jm^2 Selection	TAG_BX_TCTCACGATTCG	118	G	A	51	40	11	G/A	0.7843	SNP
Lib10^4_#1 50_Jm^2 Selection	TAG_BX_TCTCTGCAACTT	131	C	T	105	37	66	C/T	0.3524	SNP
Lib10^4_#1 50_Jm^2 Selection	TAG_BX_TCTCTGCAACTT	85	G	A	105	45	60	G/A	0.4286	SNP
Lib10^4_#1 50_Jm^2 Selection	TAG_BX_TCTCTTCATTCT	5	G	A	19	16	3	G/A	0.8421	SNP
Lib10^4_#1 50_Jm^2 Selection	TAG_BX_TCTGCATCGGTT	5	G	A	13	12	1	G/A	0.9231	SNP
Lib10^4_#1 50_Jm^2 Selection	TAG_BX_TCTGGAGTACGA	130	C	G	59	48	8	C/G	0.8136	SNP
Lib10^4_#1 50_Jm^2 Selection	TAG_BX_TCTTATCCGAAC	121	G	A	87	11	21	G/A	0.1264	SNP
Lib10^4_#1 50_Jm^2 Selection	TAG_BX_TCTTCTTTCGGG	5	G	A	51	49	2	G/A	0.9608	SNP
Lib10^4_#1 50_Jm^2 Selection	TAG_BX_TCTTGGCCTTGA	122	G	A	51	34	16	G/A	0.6667	SNP
Lib10^4_#1 50_Jm^2 Selection	TAG_BX_TCTTGGTCGGTT	131	C	T	113	90	20	C/T	0.7965	SNP
Lib10^4_#1 50_Jm^2 Selection	TAG_BX_TCTTTCGCAACG	118	G	A	81	66	14	G/A	0.8148	SNP
Lib10^4_#1 50_Jm^2 Selection	TAG_BX_TCTTTTACGGGA	70	C	T	23	3	6	C/T	0.1304	SNP
Lib10^4_#1 50_Jm^2 Selection	TAG_BX_TCTTTTGTTGGA	85	G	A	47	42	5	G/A	0.8936	SNP
Lib10^4_#1 50_Jm^2 Selection	TAG_BX_TCTTTTTTATTC	118	G	A	55	46	8	G/A	0.8364	SNP
Lib10^4_#1 50_Jm^2 Selection	TAG_BX_TGACATACTTTG	131	C	T	67	54	13	C/T	0.806	SNP
Lib10^4_#1 50_Jm^2 Selection	TAG_BX_TGACTCATAGCG	5	G	A	18	17	1	G/A	0.9444	SNP
Lib10^4_#1 50_Jm^2 Selection	TAG_BX_TGACTTAAGGAG	121	G	A	58	44	14	G/A	0.7586	SNP
Lib10^4_#1 50_Jm^2 Selection	TAG_BX_TGAGCTCTTCCT	122	G	A	143	114	28	G/A	0.7972	SNP
Lib10^4_#1 50_Jm^2 Selection	TAG_BX_TGAGCTGTCCCA	118	G	A	27	23	3	G/A	0.8519	SNP
Lib10^4_#1 50_Jm^2 Selection	TAG_BX_TGAGTCAAGACG	5	G	A	25	23	2	G/A	0.92	SNP
Lib10^4_#1 50_Jm^2 Selection	TAG_BX_TGAGTTTTTCGG	118	G	A	81	65	15	G/A	0.8025	SNP
Lib10^4_#1 50_Jm^2 Selection	TAG_BX_TGATAGTTGATG	85	G	A	127	85	42	G/A	0.6693	SNP
Lib10^4_#1 50_Jm^2 Selection	TAG_BX_TGATAGTTGATG	131	C	T	127	25	101	C/T	0.1969	SNP
Lib10^4_#1 50_Jm^2 Selection	TAG_BX_TGATCAGTCGTT	5	G	A	23	21	2	G/A	0.913	SNP
Lib10^4_#1 50_Jm^2 Selection	TAG_BX_TGATCAGTGTGG	5	G	A	51	48	3	G/A	0.9412	SNP
Lib10^4_#1 50_Jm^2 Selection	TAG_BX_TGATGGACGCTG	5	G	A	22	21	1	G/A	0.9545	SNP
Lib10^4_#1 50_Jm^2 Selection	TAG_BX_TGATGGCAGTTG	85	G	A	87	76	10	G/A	0.8736	SNP
Lib10^4_#1 50_Jm^2 Selection	TAG_BX_TGATTCCCTCCG	130	C	T	110	14	19	C/T	0.1273	SNP
Lib10^4_#1 50_Jm^2 Selection	TAG_BX_TGATTGCATCTG	118	G	A	133	96	37	G/A	0.7218	SNP
Lib10^4_#1 50_Jm^2 Selection	TAG_BX_TGCAGTCTTCAT	131	C	T	53	41	12	C/T	0.7736	SNP
Lib10^4_#1 50_Jm^2 Selection	TAG_BX_TGCCAGTTTGCA	121	G	A	113	91	21	G/A	0.8053	SNP
Lib10^4_#1 50_Jm^2 Selection	TAG_BX_TGCCGGCATTTT	85	G	A	76	60	16	G/A	0.7895	SNP
Lib10^4_#1 50_Jm^2 Selection	TAG_BX_TGCCGGGGTCCT	12	T	A	53	48	5	T/A	0.9057	SNP
Lib10^4_#1 50_Jm^2 Selection	TAG_BX_TGCCGGGTACGT	97	A	C	38	27	10	A/C	0.7105	SNP
Lib10^4_#1 50_Jm^2 Selection	TAG_BX_TGCCTTCTGTGC	85	G	A	48	39	9	G/A	0.8125	SNP
Lib10^4_#1 50_Jm^2 Selection	TAG_BX_TGCGCCTTTTGG	131	C	T	39	28	10	C/T	0.7179	SNP
Lib10^4_#1 50_Jm^2 Selection	TAG_BX_TGCGCTTGGTTG	118	G	A	69	53	15	G/A	0.7681	SNP
Lib10^4_#1 50_Jm^2 Selection	TAG_BX_TGCGCTTGGTTG	55	A	C	69	7	62	A/C	0.1014	SNP
Lib10^4_#1 50_Jm^2 Selection	TAG_BX_TGCGGTCGGGAA	40	G	C	18	2	16	G/C	0.1111	SNP
Lib10^4_#1 50_Jm^2 Selection	TAG_BX_TGCGGTCGGGAA	95	C	G	18	15	2	C/G	0.8333	SNP
Lib10^4_#1 50_Jm^2 Selection	TAG_BX_TGCGGTGAGGCA	97	A	G	14	14	0	A/G	1	SNP
Lib10^4_#1 50_Jm^2 Selection	TAG_BX_TGCGTCCATATA	131	C	T	73	59	12	C/T	0.8082	SNP
Lib10^4_#1 50_Jm^2 Selection	TAG_BX_TGCGTGCGTAAG	85	G	A	156	136	18	G/A	0.8718	SNP
Lib10^4_#1 50_Jm^2 Selection	TAG_BX_TGCGTTTTCCGT	118	G	A	33	28	5	G/A	0.8485	SNP
Lib10^4_#1 50_Jm^2 Selection	TAG_BX_TGCTCGTCCGTG	85	G	A	116	90	21	G/A	0.7759	SNP
Lib10^4_#1 50_Jm^2 Selection	TAG_BX_TGCTTCAGGGCG	131	C	T	39	23	15	C/T	0.5897	SNP
Lib10^4_#1 50_Jm^2 Selection	TAG_BX_TGCTTCAGGGCG	118	G	A	39	6	33	G/A	0.1538	SNP
Lib10^4_#1 50_Jm^2 Selection	TAG_BX_TGCTTTTTTCCG	85	G	A	60	51	8	G/A	0.85	SNP
Lib10^4_#1 50_Jm^2 Selection	TAG_BX_TGGAGCGTGAGT	130	C	T	59	46	12	C/T	0.7797	SNP
Lib10^4_#1 50_Jm^2 Selection	TAG_BX_TGGATGCCCGCT	5	G	A	106	23	83	G/A	0.217	SNP
Lib10^4_#1 50_Jm^2 Selection	TAG_BX_TGGATGCCCGCT	131	C	T	106	65	40	C/T	0.6132	SNP
Lib10^4_#1 50_Jm^2 Selection	TAG_BX_TGGATTATGTTA	121	G	A	80	62	17	G/A	0.775	SNP
Lib10^4_#1 50_Jm^2 Selection	TAG_BX_TGGCCGGGATTA	121	G	A	147	112	34	G/A	0.7619	SNP
Lib10^4_#1 50_Jm^2 Selection	TAG_BX_TGGCGAATATGG	69	T	C	45	5	40	T/C	0.1111	SNP
Lib10^4_#1 50_Jm^2 Selection	TAG_BX_TGGCGTCTTTCT	131	C	T	96	75	19	C/T	0.7812	SNP
Lib10^4_#1 50_Jm^2 Selection	TAG_BX_TGGCTGGGTTCT	118	G	A	21	16	5	G/A	0.7619	SNP
Lib10^4_#1 50_Jm^2 Selection	TAG_BX_TGGGCTGTTCCC	118	G	A	45	38	7	G/A	0.8444	SNP
Lib10^4_#1 50_Jm^2 Selection	TAG_BX_TGGGCTTCTCAT	118	G	A	77	65	10	G/A	0.8442	SNP
Lib10^4_#1 50_Jm^2 Selection	TAG_BX_TGGGTCCTACCT	118	G	A	116	101	15	G/A	0.8707	SNP
Lib10^4_#1 50_Jm^2 Selection	TAG_BX_TGGGTGCCATAC	130	C	T	64	49	11	C/T	0.7656	SNP
Lib10^4_#1 50_Jm^2 Selection	TAG_BX_TGGGTTCTTGTC	130	C	T	55	39	15	C/T	0.7091	SNP
Lib10^4_#1 50_Jm^2 Selection	TAG_BX_TGGTATGGATAC	131	C	T	65	50	14	C/T	0.7692	SNP
Lib10^4_#1 50_Jm^2 Selection	TAG_BX_TGGTCTAGTCTT	118	G	A	44	33	9	G/A	0.75	SNP
Lib10^4_#1 50_Jm^2 Selection	TAG_BX_TGGTGTCAATTT	118	G	A	73	57	15	G/A	0.7808	SNP
Lib10^4_#1 50_Jm^2 Selection	TAG_BX_TGGTTAGACATT	5	G	A	20	20	0	G/A	1	SNP
Lib10^4_#1 50_Jm^2 Selection	TAG_BX_TGGTTTCTTCCT	118	G	A	86	69	15	G/A	0.8023	SNP
Lib10^4_#1 50_Jm^2 Selection	TAG_BX_TGGTTTTTAGTA	121	G	A	73	59	13	G/A	0.8082	SNP
Lib10^4_#1 50_Jm^2 Selection	TAG_BX_TGGTTTTTGAGG	5	G	A	63	21	42	G/A	0.3333	SNP
Lib10^4_#1 50_Jm^2 Selection	TAG_BX_TGGTTTTTGAGG	131	C	T	63	34	27	C/T	0.5397	SNP
Lib10^4_#1 50_Jm^2 Selection	TAG_BX_TGTACTCATCTC	130	C	T	64	48	16	C/T	0.75	SNP
Lib10^4_#1 50_Jm^2 Selection	TAG_BX_TGTAGCTCGGAC	130	C	T	25	21	4	C/T	0.84	SNP
Lib10^4_#1 50_Jm^2 Selection	TAG_BX_TGTATCTAGCAG	121	G	A	45	31	13	G/A	0.6889	SNP
Lib10^4_#1 50_Jm^2 Selection	TAG_BX_TGTCATACGGGC	118	G	A	65	55	9	G/A	0.8462	SNP
Lib10^4_#1 50_Jm^2 Selection	TAG_BX_TGTCATGTTTGC	130	C	T	91	71	18	C/T	0.7802	SNP
Lib10^4_#1 50_Jm^2 Selection	TAG_BX_TGTCCGGTAATC	130	C	T	29	22	7	C/T	0.7586	SNP
Lib10^4_#1 50_Jm^2 Selection	TAG_BX_TGTCCTGACGTC	121	G	A	146	109	34	G/A	0.7466	SNP
Lib10^4_#1 50_Jm^2 Selection	TAG_BX_TGTCTTGTATGA	131	C	T	28	23	5	C/T	0.8214	SNP
Lib10^4_#1 50_Jm^2 Selection	TAG_BX_TGTCTTTCTGTC	5	G	C	17	17	0	G/C	1	SNP
Lib10^4_#1 50_Jm^2 Selection	TAG_BX_TGTGCACACGGA	130	C	T	114	83	28	C/T	0.7281	SNP
Lib10^4_#1 50_Jm^2 Selection	TAG_BX_TGTGCAGCTCGG	5	G	A	24	19	5	G/A	0.7917	SNP
Lib10^4_#1 50_Jm^2 Selection	TAG_BX_TGTGCCTTGTGT	134	C	G	66	26	40	C/G	0.3939	SNP
Lib10^4_#1 50_Jm^2 Selection	TAG_BX_TGTGCCTTGTGT	118	G	A	66	23	43	G/A	0.3485	SNP
Lib10^4_#1 50_Jm^2 Selection	TAG_BX_TGTGGGTCACGT	95	C	G	15	11	4	C/G	0.7333	SNP
Lib10^4_#1 50_Jm^2 Selection	TAG_BX_TGTGTGCGCAGT	118	G	A	75	63	12	G/A	0.84	SNP
Lib10^4_#1 50_Jm^2 Selection	TAG_BX_TGTGTGGGAGTG	91	G	A	20	16	4	G/A	0.8	SNP
Lib10^4_#1 50_Jm^2 Selection	TAG_BX_TGTGTTTATTCT	121	G	A	108	89	19	G/A	0.8241	SNP
Lib10^4_#1 50_Jm^2 Selection	TAG_BX_TGTTAGTGCTAG	118	G	A	35	29	6	G/A	0.8286	SNP
Lib10^4_#1 50_Jm^2 Selection	TAG_BX_TGTTGCCATCCG	130	C	T	57	6	12	C/T	0.1053	SNP
Lib10^4_#1 50_Jm^2 Selection	TAG_BX_TGTTGGCGTGTC	130	C	T	115	89	26	C/T	0.7739	SNP
Lib10^4_#1 50_Jm^2 Selection	TAG_BX_TGTTTATCTATG	130	C	T	88	11	12	C/T	0.125	SNP
Lib10^4_#1 50_Jm^2 Selection	TAG_BX_TGTTTGGTCGAT	5	G	A	21	20	1	G/A	0.9524	SNP
Lib10^4_#1 50_Jm^2 Selection	TAG_BX_TGTTTTAAGGTG	118	G	A	44	32	10	G/A	0.7273	SNP
Lib10^4_#1 50_Jm^2 Selection	TAG_BX_TGTTTTCATCTT	122	G	A	49	37	11	G/A	0.7551	SNP
Lib10^4_#1 50_Jm^2 Selection	TAG_BX_TTAACTAGTTTT	5	G	A	28	26	2	G/A	0.9286	SNP
Lib10^4_#1 50_Jm^2 Selection	TAG_BX_TTAAGTAATTTG	118	G	A	53	45	8	G/A	0.8491	SNP
Lib10^4_#1 50_Jm^2 Selection	TAG_BX_TTAATTTATACA	121	G	A	134	110	23	G/A	0.8209	SNP
Lib10^4_#1 50_Jm^2 Selection	TAG_BX_TTAATTTTTTCG	121	G	A	51	39	12	G/A	0.7647	SNP
Lib10^4_#1 50_Jm^2 Selection	TAG_BX_TTACCCGATTTT	118	G	A	84	66	17	G/A	0.7857	SNP
Lib10^4_#1 50_Jm^2 Selection	TAG_BX_TTACGCTATTTT	118	G	A	85	66	19	G/A	0.7765	SNP
Lib10^4_#1 50_Jm^2 Selection	TAG_BX_TTACGGTGAACT	118	G	A	39	32	7	G/A	0.8205	SNP
Lib10^4_#1 50_Jm^2 Selection	TAG_BX_TTACTGTATATT	85	G	A	82	73	9	G/A	0.8902	SNP
Lib10^4_#1 50_Jm^2 Selection	TAG_BX_TTAGACGCTTCG	131	C	T	40	33	7	C/T	0.825	SNP
Lib10^4_#1 50_Jm^2 Selection	TAG_BX_TTAGATATAGTT	69	T	C	143	15	126	T/C	0.1049	SNP
Lib10^4_#1 50_Jm^2 Selection	TAG_BX_TTAGATATAGTT	130	C	T	143	108	32	C/T	0.7552	SNP
Lib10^4_#1 50_Jm^2 Selection	TAG_BX_TTAGATATTGGG	118	G	A	41	27	14	G/A	0.6585	SNP
Lib10^4_#1 50_Jm^2 Selection	TAG_BX_TTAGTGAACGCT	121	G	A	58	50	8	G/A	0.8621	SNP
Lib10^4_#1 50_Jm^2 Selection	TAG_BX_TTAGTGGTTGTG	131	C	T	47	35	11	C/T	0.7447	SNP
Lib10^4_#1 50_Jm^2 Selection	TAG_BX_TTATACATGTGG	97	A	G	18	15	2	A/G	0.8333	SNP
Lib10^4_#1 50_Jm^2 Selection	TAG_BX_TTATCACAGTGT	130	C	T	104	35	66	C/T	0.3365	SNP
Lib10^4_#1 50_Jm^2 Selection	TAG_BX_TTATCTACCCCG	130	C	T	72	51	21	C/T	0.7083	SNP
Lib10^4_#1 50_Jm^2 Selection	TAG_BX_TTATGATGGATG	95	C	G	19	16	3	C/G	0.8421	SNP
Lib10^4_#1 50_Jm^2 Selection	TAG_BX_TTCAAGTAACGT	5	G	A	57	15	42	G/A	0.2632	SNP
Lib10^4_#1 50_Jm^2 Selection	TAG_BX_TTCAAGTAACGT	130	C	T	57	27	30	C/T	0.4737	SNP
Lib10^4_#1 50_Jm^2 Selection	TAG_BX_TTCAAGTTCTAT	95	C	G	71	57	13	C/G	0.8028	SNP
Lib10^4_#1 50_Jm^2 Selection	TAG_BX_TTCAGACTGTCA	118	G	A	43	6	37	G/A	0.1395	SNP
Lib10^4_#1 50_Jm^2 Selection	TAG_BX_TTCAGACTGTCA	68	T	G	43	39	4	T/G	0.907	SNP
Lib10^4_#1 50_Jm^2 Selection	TAG_BX_TTCAGATTAATA	121	G	A	56	43	11	G/A	0.7679	SNP
Lib10^4_#1 50_Jm^2 Selection	TAG_BX_TTCAGGCCGTCG	5	G	A	31	31	0	G/A	1	SNP
Lib10^4_#1 50_Jm^2 Selection	TAG_BX_TTCATAGGTAGG	85	G	A	64	51	13	G/A	0.7969	SNP
Lib10^4_#1 50_Jm^2 Selection	TAG_BX_TTCATCATGTCC	130	C	T	34	24	9	C/T	0.7059	SNP
Lib10^4_#1 50_Jm^2 Selection	TAG_BX_TTCCCTCCGCCA	85	G	A	71	59	12	G/A	0.831	SNP
Lib10^4_#1 50_Jm^2 Selection	TAG_BX_TTCCTACGTTTC	118	G	A	50	38	11	G/A	0.76	SNP
Lib10^4_#1 50_Jm^2 Selection	TAG_BX_TTCCTCAGGGGT	130	C	T	43	30	13	C/T	0.6977	SNP
Lib10^4_#1 50_Jm^2 Selection	TAG_BX_TTCCTTAGCGAT	118	G	A	261	210	48	G/A	0.8046	SNP
Lib10^4_#1 50_Jm^2 Selection	TAG_BX_TTCGATCTTTGA	85	G	A	94	79	13	G/A	0.8404	SNP
Lib10^4_#1 50_Jm^2 Selection	TAG_BX_TTCGATCTTTGA	118	G	A	94	10	84	G/A	0.1064	SNP
Lib10^4_#1 50_Jm^2 Selection	TAG_BX_TTCGTCTGCCGG	118	G	A	62	50	12	G/A	0.8065	SNP
Lib10^4_#1 50_Jm^2 Selection	TAG_BX_TTCTACTCCTCT	5	G	C	17	16	1	G/C	0.9412	SNP
Lib10^4_#1 50_Jm^2 Selection	TAG_BX_TTCTACTCCTCT	130	C	T	17	2	15	C/T	0.1176	SNP
Lib10^4_#1 50_Jm^2 Selection	TAG_BX_TTCTGCTTGCGG	131	C	T	53	41	12	C/T	0.7736	SNP
Lib10^4_#1 50_Jm^2 Selection	TAG_BX_TTCTTGACGTAT	118	G	A	31	22	9	G/A	0.7097	SNP
Lib10^4_#1 50_Jm^2 Selection	TAG_BX_TTCTTTCAGCTG	85	G	A	67	59	8	G/A	0.8806	SNP
Lib10^4_#1 50_Jm^2 Selection	TAG_BX_TTCTTTCATAGG	95	C	G	70	62	8	C/G	0.8857	SNP
Lib10^4_#1 50_Jm^2 Selection	TAG_BX_TTCTTTCGTTCT	95	C	G	30	24	4	C/G	0.8	SNP
Lib10^4_#1 50_Jm^2 Selection	TAG_BX_TTCTTTTTGGGA	85	G	A	56	43	11	G/A	0.7679	SNP
Lib10^4_#1 50_Jm^2 Selection	TAG_BX_TTGAAGCTTCGC	130	C	T	79	61	16	C/T	0.7722	SNP
Lib10^4_#1 50_Jm^2 Selection	TAG_BX_TTGACAACTGGA	131	C	T	35	4	31	C/T	0.1143	SNP
Lib10^4_#1 50_Jm^2 Selection	TAG_BX_TTGACAACTGGA	118	G	A	35	29	6	G/A	0.8286	SNP
Lib10^4_#1 50_Jm^2 Selection	TAG_BX_TTGATGGTGAGT	130	C	T	74	56	18	C/T	0.7568	SNP
Lib10^4_#1 50_Jm^2 Selection	TAG_BX_TTGATTATCGTA	131	C	T	95	76	17	C/T	0.8	SNP
Lib10^4_#1 50_Jm^2 Selection	TAG_BX_TTGATTCTTTGG	5	G	A	16	11	5	G/A	0.6875	SNP
Lib10^4_#1 50_Jm^2 Selection	TAG_BX_TTGATTCTTTGG	91	G	A	16	5	11	G/A	0.3125	SNP
Lib10^4_#1 50_Jm^2 Selection	TAG_BX_TTGCGCTGCCCT	131	C	T	82	58	24	C/T	0.7073	SNP
Lib10^4_#1 50_Jm^2 Selection	TAG_BX_TTGCTGATTCAT	85	G	A	81	64	16	G/A	0.7901	SNP
Lib10^4_#1 50_Jm^2 Selection	TAG_BX_TTGCTGGGTTTT	95	C	G	44	37	7	C/G	0.8409	SNP
Lib10^4_#1 50_Jm^2 Selection	TAG_BX_TTGCTTGCCTTT	95	C	G	64	48	15	C/G	0.75	SNP
Lib10^4_#1 50_Jm^2 Selection	TAG_BX_TTGGAGCTCAGT	5	G	A	20	18	2	G/A	0.9	SNP
Lib10^4_#1 50_Jm^2 Selection	TAG_BX_TTGGAGCTCAGT	130	C	T	20	3	17	C/T	0.15	SNP
Lib10^4_#1 50_Jm^2 Selection	TAG_BX_TTGGATCATTTT	118	G	A	37	25	12	G/A	0.6757	SNP
Lib10^4_#1 50_Jm^2 Selection	TAG_BX_TTGGCAAGGGAA	131	C	T	63	46	16	C/T	0.7302	SNP
Lib10^4_#1 50_Jm^2 Selection	TAG_BX_TTGGCCCAGTTT	118	G	A	96	72	24	G/A	0.75	SNP
Lib10^4_#1 50_Jm^2 Selection	TAG_BX_TTGGCCGCGGGG	130	C	T	171	28	31	C/T	0.1637	SNP
Lib10^4_#1 50_Jm^2 Selection	TAG_BX_TTGGCTGGCAAT	95	C	G	161	141	20	C/G	0.8758	SNP
Lib10^4_#1 50_Jm^2 Selection	TAG_BX_TTGGCTTTTCTG	118	G	A	30	22	8	G/A	0.7333	SNP
Lib10^4_#1 50_Jm^2 Selection	TAG_BX_TTGGGTACTCTC	118	G	A	53	42	11	G/A	0.7925	SNP
Lib10^4_#1 50_Jm^2 Selection	TAG_BX_TTGGGTTTTATT	130	C	T	99	63	34	C/T	0.6364	SNP
Lib10^4_#1 50_Jm^2 Selection	TAG_BX_TTGGGTTTTATT	131	C	T	99	20	78	C/T	0.202	SNP
Lib10^4_#1 50_Jm^2 Selection	TAG_BX_TTGGTGGTGTAC	118	G	A	45	30	15	G/A	0.6667	SNP
Lib10^4_#1 50_Jm^2 Selection	TAG_BX_TTGGTGGTGTAC	130	C	T	45	5	40	C/T	0.1111	SNP
Lib10^4_#1 50_Jm^2 Selection	TAG_BX_TTGGTTATGTAT	118	G	A	165	90	75	G/A	0.5455	SNP
Lib10^4_#1 50_Jm^2 Selection	TAG_BX_TTGGTTGTACCC	5	G	A	31	28	3	G/A	0.9032	SNP
Lib10^4_#1 50_Jm^2 Selection	TAG_BX_TTGGTTTGTATT	85	G	A	67	62	5	G/A	0.9254	SNP
Lib10^4_#1 50_Jm^2 Selection	TAG_BX_TTGTAACGCGTA	97	A	G	39	31	8	A/G	0.7949	SNP
Lib10^4_#1 50_Jm^2 Selection	TAG_BX_TTGTACTGGCTT	5	G	A	13	11	2	G/A	0.8462	SNP
Lib10^4_#1 50_Jm^2 Selection	TAG_BX_TTGTACTGGGTA	5	G	A	25	25	0	G/A	1	SNP
Lib10^4_#1 50_Jm^2 Selection	TAG_BX_TTGTACTGTGAG	118	G	A	69	53	16	G/A	0.7681	SNP
Lib10^4_#1 50_Jm^2 Selection	TAG_BX_TTGTAGCGGAAC	95	C	G	93	77	16	C/G	0.828	SNP
Lib10^4_#1 50_Jm^2 Selection	TAG_BX_TTGTAGTAATCT	118	G	A	44	37	7	G/A	0.8409	SNP
Lib10^4_#1 50_Jm^2 Selection	TAG_BX_TTGTATAGTTGG	131	C	T	35	30	4	C/T	0.8571	SNP
Lib10^4_#1 50_Jm^2 Selection	TAG_BX_TTGTATTCTTCT	130	C	T	39	29	10	C/T	0.7436	SNP
Lib10^4_#1 50_Jm^2 Selection	TAG_BX_TTGTCGCCCTCG	121	G	A	77	52	22	G/A	0.6753	SNP
Lib10^4_#1 50_Jm^2 Selection	TAG_BX_TTGTCTATGACC	130	C	T	149	19	23	C/T	0.1275	SNP
Lib10^4_#1 50_Jm^2 Selection	TAG_BX_TTGTCTTATGTG	5	G	A	34	32	2	G/A	0.9412	SNP
Lib10^4_#1 50_Jm^2 Selection	TAG_BX_TTGTGGGGAGTG	5	G	A	21	20	1	G/A	0.9524	SNP
Lib10^4_#1 50_Jm^2 Selection	TAG_BX_TTGTGTGGCTAT	118	G	A	117	98	18	G/A	0.8376	SNP
Lib10^4_#1 50_Jm^2 Selection	TAG_BX_TTGTTATGCGTT	121	G	A	78	53	25	G/A	0.6795	SNP
Lib10^4_#1 50_Jm^2 Selection	TAG_BX_TTGTTTCGTGAT	5	G	A	14	12	2	G/A	0.8571	SNP
Lib10^4_#1 50_Jm^2 Selection	TAG_BX_TTGTTTCGTGAT	55	A	C	14	2	12	A/C	0.1429	SNP
Lib10^4_#1 50_Jm^2 Selection	TAG_BX_TTGTTTGGTTGC	131	C	T	39	33	6	C/T	0.8462	SNP
Lib10^4_#1 50_Jm^2 Selection	TAG_BX_TTGTTTTCTTTG	131	C	T	29	25	4	C/T	0.8621	SNP
Lib10^4_#1 50_Jm^2 Selection	TAG_BX_TTTAACCCGCAA	95	C	G	75	61	14	C/G	0.8133	SNP
Lib10^4_#1 50_Jm^2 Selection	TAG_BX_TTTAAGTCGTTC	131	C	T	39	31	8	C/T	0.7949	SNP
Lib10^4_#1 50_Jm^2 Selection	TAG_BX_TTTACAACATTG	130	C	T	100	14	21	C/T	0.14	SNP
Lib10^4_#1 50_Jm^2 Selection	TAG_BX_TTTACAATATGG	130	C	T	262	31	54	C/T	0.1183	SNP
Lib10^4_#1 50_Jm^2 Selection	TAG_BX_TTTACGTGGCGT	131	C	T	81	60	20	C/T	0.7407	SNP
Lib10^4_#1 50_Jm^2 Selection	TAG_BX_TTTAGTTGTCCT	85	G	A	121	99	20	G/A	0.8182	SNP
Lib10^4_#1 50_Jm^2 Selection	TAG_BX_TTTCATTCATCG	121	G	A	68	52	16	G/A	0.7647	SNP
Lib10^4_#1 50_Jm^2 Selection	TAG_BX_TTTCGGCTGGCT	5	G	A	38	35	3	G/A	0.9211	SNP
Lib10^4_#1 50_Jm^2 Selection	TAG_BX_TTTCGTTACCAC	118	G	A	55	38	16	G/A	0.6909	SNP
Lib10^4_#1 50_Jm^2 Selection	TAG_BX_TTTCTATTTTGG	85	G	A	58	51	7	G/A	0.8793	SNP
Lib10^4_#1 50_Jm^2 Selection	TAG_BX_TTTCTTGGTGTG	85	G	A	42	35	6	G/A	0.8333	SNP
Lib10^4_#1 50_Jm^2 Selection	TAG_BX_TTTGAAGATATC	118	G	A	29	24	5	G/A	0.8276	SNP
Lib10^4_#1 50_Jm^2 Selection	TAG_BX_TTTGCTCTAGCT	85	G	A	44	35	8	G/A	0.7955	SNP
Lib10^4_#1 50_Jm^2 Selection	TAG_BX_TTTGGACTATGG	5	G	A	49	41	8	G/A	0.8367	SNP
Lib10^4_#1 50_Jm^2 Selection	TAG_BX_TTTGGGCTAGAG	118	G	A	58	46	11	G/A	0.7931	SNP
Lib10^4_#1 50_Jm^2 Selection	TAG_BX_TTTGTATGTTCG	118	G	A	54	43	11	G/A	0.7963	SNP
Lib10^4_#1 50_Jm^2 Selection	TAG_BX_TTTGTCAGATTG	131	C	T	32	24	7	C/T	0.75	SNP
Lib10^4_#1 50_Jm^2 Selection	TAG_BX_TTTGTCGAACGG	69	T	C	24	5	18	T/C	0.2083	SNP
Lib10^4_#1 50_Jm^2 Selection	TAG_BX_TTTGTCGAACGG	5	G	A	24	21	3	G/A	0.875	SNP
Lib10^4_#1 50_Jm^2 Selection	TAG_BX_TTTGTCGTGGCG	131	C	T	106	88	17	C/T	0.8302	SNP
Lib10^4_#1 50_Jm^2 Selection	TAG_BX_TTTGTTGCATAG	118	G	A	69	56	13	G/A	0.8116	SNP
Lib10^4_#1 50_Jm^2 Selection	TAG_BX_TTTTACGTTGAA	5	G	A	40	38	2	G/A	0.95	SNP
Lib10^4_#1 50_Jm^2 Selection	TAG_BX_TTTTAGAACATT	121	G	A	90	12	18	G/A	0.1333	SNP
Lib10^4_#1 50_Jm^2 Selection	TAG_BX_TTTTAGAACATT	118	G	A	79	10	68	G/A	0.1266	SNP
Lib10^4_#1 50_Jm^2 Selection	TAG_BX_TTTTAGACTACT	130	C	T	30	25	5	C/T	0.8333	SNP
Lib10^4_#1 50_Jm^2 Selection	TAG_BX_TTTTAGGGCAAA	121	G	A	97	72	25	G/A	0.7423	SNP
Lib10^4_#1 50_Jm^2 Selection	TAG_BX_TTTTATCTTGAT	130	C	T	81	12	8	C/T	0.1481	SNP
Lib10^4_#1 50_Jm^2 Selection	TAG_BX_TTTTATTGAGCA	85	G	A	164	135	26	G/A	0.8232	SNP
Lib10^4_#1 50_Jm^2 Selection	TAG_BX_TTTTCCCTCTTC	5	G	A	28	24	4	G/A	0.8571	SNP
Lib10^4_#1 50_Jm^2 Selection	TAG_BX_TTTTCCGTTGTT	130	C	T	89	70	18	C/T	0.7865	SNP
Lib10^4_#1 50_Jm^2 Selection	TAG_BX_TTTTCGTGCCTA	5	G	A	19	19	0	G/A	1	SNP
Lib10^4_#1 50_Jm^2 Selection	TAG_BX_TTTTGAATAACG	130	C	T	58	44	14	C/T	0.7586	SNP
Lib10^4_#1 50_Jm^2 Selection	TAG_BX_TTTTGGCTGCTA	121	G	A	121	62	58	G/A	0.5124	SNP
Lib10^4_#1 50_Jm^2 Selection	TAG_BX_TTTTGGCTGCTA	130	C	T	121	37	84	C/T	0.3058	SNP
Lib10^4_#1 50_Jm^2 Selection	TAG_BX_TTTTGGGAATAT	131	C	T	19	13	6	C/T	0.6842	SNP
Lib10^4_#1 50_Jm^2 Selection	TAG_BX_TTTTGGGAATAT	130	C	T	19	2	17	C/T	0.1053	SNP
Lib10^4_#1 50_Jm^2 Selection	TAG_BX_TTTTTAGAGGCG	121	G	A	68	53	15	G/A	0.7794	SNP
Lib10^4_#1 50_Jm^2 Selection	TAG_BX_TTTTTATCGGGT	5	G	A	27	24	3	G/A	0.8889	SNP
Lib10^4_#1 50_Jm^2 Selection	TAG_BX_TTTTTATTTCTT	130	C	T	50	12	7	C/T	0.24	SNP
Lib10^4_#1 50_Jm^2 Selection	TAG_BX_TTTTTCAGCGTG	118	G	A	118	95	23	G/A	0.8051	SNP
Lib10^4_#1 50_Jm^2 Selection	TAG_BX_TTTTTGATATCC	130	C	T	48	37	10	C/T	0.7708	SNP
Lib10^4_#1 50_Jm^2 Selection	TAG_BX_TTTTTGATTTTT	130	C	T	51	39	11	C/T	0.7647	SNP
Lib10^4_#1 50_Jm^2 Selection	TAG_BX_TTTTTTCGTTCA	5	G	A	21	19	2	G/A	0.9048	SNP
Lib10^4_#1 50_Jm^2 Selection	TAG_BX_TTTTTTGCGCTT	130	C	T	34	26	7	C/T	0.7647	SNP
Lib10^4_#1 50_Jm^2 Selection	TAG_BX_AACCCTGACTTT	30	AAGGGAGCAGGCCAGTAAAAGCATTACCTGTGGTGGGGTTCCCGAGCGGCCA		17	10	7	AAGGGAGCAGGCCAGTAAAAGCATTACCTGTGGTGGGGTTCCCGAGCGGCCA/	0.5882	Del
Lib10^4_#1 50_Jm^2 Selection	TAG_BX_AGCCTATGAGTT	-63	GCTTCTAG		58	57	1	GCTTCTAG/	0.9828	Del
Lib10^4_#1 50_Jm^2 Selection	TAG_BX_AGTCTGCGGGTG	63	TGGGGTTCCCGAGCGGCCAAAGGGAGCAGACTCTAAAT		45	34	10	TGGGGTTCCCGAGCGGCCAAAGGGAGCAGACTCTAAAT/	0.7556	Del
Lib10^4_#1 50_Jm^2 Selection	TAG_BX_ATTGTAAGACTT	-41	TT		110	109	1	TT/	0.9909	Del
Lib10^4_#1 50_Jm^2 Selection	TAG_BX_ATTGTAAGACTT	134	C		110	27	82	C/	0.2455	1Del
Lib10^4_#1 50_Jm^2 Selection	TAG_BX_CATGTGGCCCTT	77	GGCCAAA		12	8	4	GGCCAAA/	0.6667	Del
Lib10^4_#1 50_Jm^2 Selection	TAG_BX_GAAGTCAGGCTA	64	G		40	36	4	G/	0.9	1Del
Lib10^4_#1 50_Jm^2 Selection	TAG_BX_GAGCGACTGGTG	30	AAGGGAGCAGGCCAGTAAAAGCATTACCTGTGGTGGGGTTCCCGAGCGGCCA		76	54	22	AAGGGAGCAGGCCAGTAAAAGCATTACCTGTGGTGGGGTTCCCGAGCGGCCA/	0.7105	Del
Lib10^4_#1 50_Jm^2 Selection	TAG_BX_GAGGCATCAATG	-59	C		115	114	0	C/	0.9913	1Del
Lib10^4_#1 50_Jm^2 Selection	TAG_BX_GCGCGAGTGTTA	64	G		78	59	19	G/	0.7564	1Del
Lib10^4_#1 50_Jm^2 Selection	TAG_BX_GTTTCGAATTCC	139	A		88	71	15	A/	0.8068	1Del
Lib10^4_#1 50_Jm^2 Selection	TAG_BX_TCATCCTTCAGA	-65	A		38	37	1	A/	0.9737	1Del
Lib10^4_#1 50_Jm^2 Selection	TAG_BX_TCCATGTCATAG	90	A		216	31	184	A/	0.1435	1Del
Lib10^4_#1 50_Jm^2 Selection	TAG_BX_TCGTTTGTGGGG	-32	T		86	82	4	T/	0.9535	1Del
Lib10^4_#1 50_Jm^2 Selection	TAG_BX_TGCATGATGTCC	-5	G		48	45	3	G/	0.9375	1Del
Lib10^4_#1 50_Jm^2 Selection	TAG_BX_TGGATTATGTTA	-62	CTT		80	80	0	CTT/	1	Del
Lib10^4_#1 50_Jm^2 Selection	TAG_BX_TTATACGTGGAG	90	A		56	40	16	A/	0.7143	1Del
Lib10^4_#1 50_Jm^2 Selection	TAG_BX_TTTAGTGGGCTC	65	GGGTTCCCGA		13	11	2	GGGTTCCCGA/	0.8462	Del
Lib10^4_#2 50_Jm^2 Selection	TAG_BX_AGCCGATTTTTA	50	GCATTACCT	AGCATTACCCC	41	29	7	GCATTACCT/AGCATTACCCC	0.7073	Del-In
Lib10^4_#2 50_Jm^2 Selection	TAG_BX_AACCGGACTCCA	84	GG	AA	91	27	64	GG/AA	0.2967	DNP
Lib10^4_#2 50_Jm^2 Selection	TAG_BX_AACGGCTTGTGG	61	GG	AA	16	13	2	GG/AA	0.8125	DNP
Lib10^4_#2 50_Jm^2 Selection	TAG_BX_AAGCGTAAGAAA	130	CC	TT	72	57	8	CC/TT	0.7917	DNP
Lib10^4_#2 50_Jm^2 Selection	TAG_BX_AAGGTTCCACGG	130	CC	TT	47	35	6	CC/TT	0.7447	DNP
Lib10^4_#2 50_Jm^2 Selection	TAG_BX_ACAAGTTCGCTC	65	GG	AA	56	50	4	GG/AA	0.8929	DNP
Lib10^4_#2 50_Jm^2 Selection	TAG_BX_ACCGTAGAGGCG	130	CC	TT	74	53	10	CC/TT	0.7162	DNP
Lib10^4_#2 50_Jm^2 Selection	TAG_BX_ACGACGATGCTA	130	CC	TT	76	56	13	CC/TT	0.7368	DNP
Lib10^4_#2 50_Jm^2 Selection	TAG_BX_ACGGTAGGGTGT	121	GG	AA	25	16	3	GG/AA	0.64	DNP
Lib10^4_#2 50_Jm^2 Selection	TAG_BX_ACTCCCGTCTGC	65	GG	AA	55	43	6	GG/AA	0.7818	DNP
Lib10^4_#2 50_Jm^2 Selection	TAG_BX_AGAGGGGATGTT	130	CC	TT	117	50	48	CC/TT	0.4274	DNP
Lib10^4_#2 50_Jm^2 Selection	TAG_BX_AGCGGGGCTATT	130	CC	TT	18	14	2	CC/TT	0.7778	DNP
Lib10^4_#2 50_Jm^2 Selection	TAG_BX_AGGTTTATTGGG	84	GG	AA	50	39	8	GG/AA	0.78	DNP
Lib10^4_#2 50_Jm^2 Selection	TAG_BX_AGTGGGTTCTCT	65	GG	AA	15	10	4	GG/AA	0.6667	DNP
Lib10^4_#2 50_Jm^2 Selection	TAG_BX_AGTTAAGCTAGC	121	GG	AA	51	37	10	GG/AA	0.7255	DNP
Lib10^4_#2 50_Jm^2 Selection	TAG_BX_ATATGCTTGGAT	65	GG	AA	28	22	5	GG/AA	0.7857	DNP
Lib10^4_#2 50_Jm^2 Selection	TAG_BX_ATCGGTGGGATT	130	CC	TT	73	51	6	CC/TT	0.6986	DNP
Lib10^4_#2 50_Jm^2 Selection	TAG_BX_ATGACTACGGGT	65	GG	AA	68	52	12	GG/AA	0.7647	DNP
Lib10^4_#2 50_Jm^2 Selection	TAG_BX_ATGGTTGTGATT	130	CC	TT	37	27	4	CC/TT	0.7297	DNP
Lib10^4_#2 50_Jm^2 Selection	TAG_BX_ATGTGGGGGGTG	130	CC	TT	30	23	4	CC/TT	0.7667	DNP
Lib10^4_#2 50_Jm^2 Selection	TAG_BX_ATTAGGTTCCGC	85	GG	AA	18	16	1	GG/AA	0.8889	DNP
Lib10^4_#2 50_Jm^2 Selection	TAG_BX_ATTATTGTTATC	64	GG	AA	36	27	8	GG/AA	0.75	DNP
Lib10^4_#2 50_Jm^2 Selection	TAG_BX_ATTCTCTGATCT	65	GG	AA	41	34	7	GG/AA	0.8293	DNP
Lib10^4_#2 50_Jm^2 Selection	TAG_BX_ATTTTTAATTTC	130	CC	TT	78	58	9	CC/TT	0.7436	DNP
Lib10^4_#2 50_Jm^2 Selection	TAG_BX_CAACAATTGTAG	130	CC	TT	94	66	10	CC/TT	0.7021	DNP
Lib10^4_#2 50_Jm^2 Selection	TAG_BX_CAAGACTTGTAC	121	GG	AA	26	17	2	GG/AA	0.6538	DNP
Lib10^4_#2 50_Jm^2 Selection	TAG_BX_CAGCAGTACGTT	65	GG	AA	90	25	61	GG/AA	0.2778	DNP
Lib10^4_#2 50_Jm^2 Selection	TAG_BX_CAGCCACCGCGA	64	GG	AA	14	13	1	GG/AA	0.9286	DNP
Lib10^4_#2 50_Jm^2 Selection	TAG_BX_CCGGGTTCCCTG	61	GG	AA	63	56	3	GG/AA	0.8889	DNP
Lib10^4_#2 50_Jm^2 Selection	TAG_BX_CCGGTTTCGGGG	77	GG	AA	32	23	7	GG/AA	0.7188	DNP
Lib10^4_#2 50_Jm^2 Selection	TAG_BX_CCTTTTTGGTGC	84	GG	AA	21	17	4	GG/AA	0.8095	DNP
Lib10^4_#2 50_Jm^2 Selection	TAG_BX_CGAGGGCCGTCT	70	CC	TT	55	42	8	CC/TT	0.7636	DNP
Lib10^4_#2 50_Jm^2 Selection	TAG_BX_CGATGCTCTCTT	85	GG	AA	39	29	7	GG/AA	0.7436	DNP
Lib10^4_#2 50_Jm^2 Selection	TAG_BX_CGCAGGCCTTTT	130	CC	TT	182	136	16	CC/TT	0.7473	DNP
Lib10^4_#2 50_Jm^2 Selection	TAG_BX_CGCCTAAGCGAG	85	GG	AA	97	80	9	GG/AA	0.8247	DNP
Lib10^4_#2 50_Jm^2 Selection	TAG_BX_CGGATCTTTCAG	66	GG	AA	41	31	6	GG/AA	0.7561	DNP
Lib10^4_#2 50_Jm^2 Selection	TAG_BX_CGGCGAGGTAGT	65	GG	AA	57	44	6	GG/AA	0.7719	DNP
Lib10^4_#2 50_Jm^2 Selection	TAG_BX_CGGGATTATCTC	61	GG	AA	56	50	3	GG/AA	0.8929	DNP
Lib10^4_#2 50_Jm^2 Selection	TAG_BX_CGTATTAGATCC	84	GG	AA	38	30	8	GG/AA	0.7895	DNP
Lib10^4_#2 50_Jm^2 Selection	TAG_BX_CGTCGCTTTATC	85	GG	AA	72	58	9	GG/AA	0.8056	DNP
Lib10^4_#2 50_Jm^2 Selection	TAG_BX_CGTTGCTTGTGT	70	CC	TT	74	25	45	CC/TT	0.3378	DNP
Lib10^4_#2 50_Jm^2 Selection	TAG_BX_CTCACCATTCGG	121	GG	AA	80	57	8	GG/AA	0.7125	DNP
Lib10^4_#2 50_Jm^2 Selection	TAG_BX_CTGCAGGTCATT	117	CG	TT	59	42	8	CG/TT	0.7119	DNP
Lib10^4_#2 50_Jm^2 Selection	TAG_BX_CTGGGACTCCGG	121	GG	AA	24	20	2	GG/AA	0.8333	DNP
Lib10^4_#2 50_Jm^2 Selection	TAG_BX_CTTAGGCTAAGT	80	CA	AC	12	11	1	CA/AC	0.9167	DNP
Lib10^4_#2 50_Jm^2 Selection	TAG_BX_CTTGAGTCTTGG	61	GG	AA	32	25	5	GG/AA	0.7812	DNP
Lib10^4_#2 50_Jm^2 Selection	TAG_BX_CTTTTTCGTGCT	70	CC	TT	93	32	59	CC/TT	0.3441	DNP
Lib10^4_#2 50_Jm^2 Selection	TAG_BX_GAATTTTGATCT	84	GG	AA	44	38	6	GG/AA	0.8636	DNP
Lib10^4_#2 50_Jm^2 Selection	TAG_BX_GACTCAGGTGCA	121	GG	AA	36	29	2	GG/AA	0.8056	DNP
Lib10^4_#2 50_Jm^2 Selection	TAG_BX_GAGAGCCATATC	84	GG	AA	60	52	7	GG/AA	0.8667	DNP
Lib10^4_#2 50_Jm^2 Selection	TAG_BX_GAGGGCCCAGTA	61	GG	AA	26	22	4	GG/AA	0.8462	DNP
Lib10^4_#2 50_Jm^2 Selection	TAG_BX_GAGGGTGCTTAA	65	GG	AA	73	58	7	GG/AA	0.7945	DNP
Lib10^4_#2 50_Jm^2 Selection	TAG_BX_GAGTGTCAGAAG	64	GG	AA	50	45	5	GG/AA	0.9	DNP
Lib10^4_#2 50_Jm^2 Selection	TAG_BX_GATAAACCCAGG	65	GG	AA	59	50	6	GG/AA	0.8475	DNP
Lib10^4_#2 50_Jm^2 Selection	TAG_BX_GATTTGCGGTCT	130	CC	TT	124	48	15	CC/TT	0.3871	DNP
Lib10^4_#2 50_Jm^2 Selection	TAG_BX_GCCTCGTTCCGG	121	GG	AA	55	38	8	GG/AA	0.6909	DNP
Lib10^4_#2 50_Jm^2 Selection	TAG_BX_GCCTTATAATTC	65	GG	AA	38	30	8	GG/AA	0.7895	DNP
Lib10^4_#2 50_Jm^2 Selection	TAG_BX_GCGATTATTGTA	84	GG	AA	34	27	5	GG/AA	0.7941	DNP
Lib10^4_#2 50_Jm^2 Selection	TAG_BX_GCGGAAGCGGGA	85	GG	AA	78	60	11	GG/AA	0.7692	DNP
Lib10^4_#2 50_Jm^2 Selection	TAG_BX_GCGGCCACAAAG	130	CC	TT	48	35	6	CC/TT	0.7292	DNP
Lib10^4_#2 50_Jm^2 Selection	TAG_BX_GCTCTGTCGCGG	85	GG	AA	99	81	13	GG/AA	0.8182	DNP
Lib10^4_#2 50_Jm^2 Selection	TAG_BX_GGACGAATCCTA	106	GT	AA	61	40	8	GT/AA	0.6557	DNP
Lib10^4_#2 50_Jm^2 Selection	TAG_BX_GGATCTGTTTGA	65	GG	AA	28	21	6	GG/AA	0.75	DNP
Lib10^4_#2 50_Jm^2 Selection	TAG_BX_GGATCTTCTTAC	85	GG	AA	41	32	5	GG/AA	0.7805	DNP
Lib10^4_#2 50_Jm^2 Selection	TAG_BX_GGCATGACGCGT	65	GG	AA	66	49	7	GG/AA	0.7424	DNP
Lib10^4_#2 50_Jm^2 Selection	TAG_BX_GGCTCACGTGTT	61	GG	AA	57	43	7	GG/AA	0.7544	DNP
Lib10^4_#2 50_Jm^2 Selection	TAG_BX_GGGGAGCGTGTG	121	GG	AA	79	60	7	GG/AA	0.7595	DNP
Lib10^4_#2 50_Jm^2 Selection	TAG_BX_GGTACACTTGTT	130	CC	TT	118	37	71	CC/TT	0.3136	DNP
Lib10^4_#2 50_Jm^2 Selection	TAG_BX_GGTATGTAATGG	130	CC	TT	55	37	9	CC/TT	0.6727	DNP
Lib10^4_#2 50_Jm^2 Selection	TAG_BX_GGTGACGGTTCC	77	GG	AA	38	30	3	GG/AA	0.7895	DNP
Lib10^4_#2 50_Jm^2 Selection	TAG_BX_GGTTGCGGTTAA	130	CC	TT	137	97	20	CC/TT	0.708	DNP
Lib10^4_#2 50_Jm^2 Selection	TAG_BX_GTAATCTTACCG	85	GG	AA	25	20	2	GG/AA	0.8	DNP
Lib10^4_#2 50_Jm^2 Selection	TAG_BX_GTACCATCCTCA	65	GG	AA	18	12	2	GG/AA	0.6667	DNP
Lib10^4_#2 50_Jm^2 Selection	TAG_BX_GTAGGCCAAGCC	61	GG	AA	28	21	4	GG/AA	0.75	DNP
Lib10^4_#2 50_Jm^2 Selection	TAG_BX_GTCAATATTATA	130	CC	TT	31	24	3	CC/TT	0.7742	DNP
Lib10^4_#2 50_Jm^2 Selection	TAG_BX_GTCAGTACGTGA	130	CC	TT	46	38	2	CC/TT	0.8261	DNP
Lib10^4_#2 50_Jm^2 Selection	TAG_BX_GTCTGACCAAGT	61	GG	AA	62	57	4	GG/AA	0.9194	DNP
Lib10^4_#2 50_Jm^2 Selection	TAG_BX_GTGCTATTTGGG	84	GG	AA	32	26	5	GG/AA	0.8125	DNP
Lib10^4_#2 50_Jm^2 Selection	TAG_BX_GTTCACTTTGTG	84	GG	AA	110	26	84	GG/AA	0.2364	DNP
Lib10^4_#2 50_Jm^2 Selection	TAG_BX_GTTCCCTCTGGT	130	CC	TT	98	72	11	CC/TT	0.7347	DNP
Lib10^4_#2 50_Jm^2 Selection	TAG_BX_GTTTAGCGTCTT	84	GG	AA	44	36	8	GG/AA	0.8182	DNP
Lib10^4_#2 50_Jm^2 Selection	TAG_BX_GTTTCCCATTTT	65	GG	AA	152	135	11	GG/AA	0.8882	DNP
Lib10^4_#2 50_Jm^2 Selection	TAG_BX_GTTTCGGTGTCG	66	GG	AA	79	66	9	GG/AA	0.8354	DNP
Lib10^4_#2 50_Jm^2 Selection	TAG_BX_GTTTGGTTATTG	130	CC	TT	41	30	6	CC/TT	0.7317	DNP
Lib10^4_#2 50_Jm^2 Selection	TAG_BX_GTTTTGTTTGGG	85	GG	AA	59	46	11	GG/AA	0.7797	DNP
Lib10^4_#2 50_Jm^2 Selection	TAG_BX_GTTTTTTGGCAT	64	GG	AA	39	34	5	GG/AA	0.8718	DNP
Lib10^4_#2 50_Jm^2 Selection	TAG_BX_TAATTTGGTCCC	121	GG	AA	66	46	10	GG/AA	0.697	DNP
Lib10^4_#2 50_Jm^2 Selection	TAG_BX_TACATGTGGGTT	65	GG	AA	36	30	3	GG/AA	0.8333	DNP
Lib10^4_#2 50_Jm^2 Selection	TAG_BX_TACTCATTAGGT	130	CC	TT	21	17	1	CC/TT	0.8095	DNP
Lib10^4_#2 50_Jm^2 Selection	TAG_BX_TACTTGCAGTGG	61	GG	AA	94	47	43	GG/AA	0.5	DNP
Lib10^4_#2 50_Jm^2 Selection	TAG_BX_TAGGGTGGAGTT	64	GG	AA	38	28	6	GG/AA	0.7368	DNP
Lib10^4_#2 50_Jm^2 Selection	TAG_BX_TAGGTTTCGAAT	65	GG	AA	28	23	4	GG/AA	0.8214	DNP
Lib10^4_#2 50_Jm^2 Selection	TAG_BX_TAGTGGGTATGT	65	GG	AA	83	62	15	GG/AA	0.747	DNP
Lib10^4_#2 50_Jm^2 Selection	TAG_BX_TATATGTGGAAT	130	CC	TT	81	59	10	CC/TT	0.7284	DNP
Lib10^4_#2 50_Jm^2 Selection	TAG_BX_TATTGGATGGGG	65	GG	AA	61	53	5	GG/AA	0.8689	DNP
Lib10^4_#2 50_Jm^2 Selection	TAG_BX_TCAGGTAAGTTT	61	GG	AA	43	40	1	GG/AA	0.9302	DNP
Lib10^4_#2 50_Jm^2 Selection	TAG_BX_TCATGGAATTCT	130	CC	TT	46	29	10	CC/TT	0.6304	DNP
Lib10^4_#2 50_Jm^2 Selection	TAG_BX_TCATTATGTTCG	65	GG	AA	34	30	1	GG/AA	0.8824	DNP
Lib10^4_#2 50_Jm^2 Selection	TAG_BX_TCCGAGTATTCA	121	GG	AA	55	40	7	GG/AA	0.7273	DNP
Lib10^4_#2 50_Jm^2 Selection	TAG_BX_TCCGGTTGTTCG	85	GG	AA	64	57	5	GG/AA	0.8906	DNP
Lib10^4_#2 50_Jm^2 Selection	TAG_BX_TCCTTGCTCATG	130	CC	TT	138	109	15	CC/TT	0.7899	DNP
Lib10^4_#2 50_Jm^2 Selection	TAG_BX_TCGGGGAACTCG	61	GG	AA	37	30	5	GG/AA	0.8108	DNP
Lib10^4_#2 50_Jm^2 Selection	TAG_BX_TCGGGGTCCTTT	130	CC	TT	111	43	63	CC/TT	0.3874	DNP
Lib10^4_#2 50_Jm^2 Selection	TAG_BX_TCGGGGTGTGGA	130	CC	TT	61	47	10	CC/TT	0.7705	DNP
Lib10^4_#2 50_Jm^2 Selection	TAG_BX_TCGTCAAGACTT	61	GG	AA	27	23	3	GG/AA	0.8519	DNP
Lib10^4_#2 50_Jm^2 Selection	TAG_BX_TCTAATCTCAGC	65	GG	AA	23	17	4	GG/AA	0.7391	DNP
Lib10^4_#2 50_Jm^2 Selection	TAG_BX_TGAGCATTCATT	121	GG	AA	71	51	10	GG/AA	0.7183	DNP
Lib10^4_#2 50_Jm^2 Selection	TAG_BX_TGATATGTGTGC	65	GG	AA	44	38	5	GG/AA	0.8636	DNP
Lib10^4_#2 50_Jm^2 Selection	TAG_BX_TGATTCTTGCCG	121	GG	AA	63	39	20	GG/AA	0.619	DNP
Lib10^4_#2 50_Jm^2 Selection	TAG_BX_TGCCCATTTATA	130	CC	TT	109	47	53	CC/TT	0.4312	DNP
Lib10^4_#2 50_Jm^2 Selection	TAG_BX_TGGGTGGCTGAA	65	GG	AA	64	50	12	GG/AA	0.7812	DNP
Lib10^4_#2 50_Jm^2 Selection	TAG_BX_TGTAGCTTAATC	130	CC	TT	44	34	6	CC/TT	0.7727	DNP
Lib10^4_#2 50_Jm^2 Selection	TAG_BX_TGTTGATTCTGT	130	CC	TT	40	28	9	CC/TT	0.7	DNP
Lib10^4_#2 50_Jm^2 Selection	TAG_BX_TGTTGTGTGGTC	130	CC	TT	47	34	7	CC/TT	0.7234	DNP
Lib10^4_#2 50_Jm^2 Selection	TAG_BX_TTAGGTAGGTTC	121	GG	AA	52	39	5	GG/AA	0.75	DNP
Lib10^4_#2 50_Jm^2 Selection	TAG_BX_TTATCGCTCTGG	85	GG	AA	61	53	5	GG/AA	0.8689	DNP
Lib10^4_#2 50_Jm^2 Selection	TAG_BX_TTCCACTTTCTT	70	CC	TT	31	23	5	CC/TT	0.7419	DNP
Lib10^4_#2 50_Jm^2 Selection	TAG_BX_TTCCGACTTTGC	121	GG	AA	35	30	1	GG/AA	0.8571	DNP
Lib10^4_#2 50_Jm^2 Selection	TAG_BX_TTCGATGAGCTC	66	GG	AA	18	16	1	GG/AA	0.8889	DNP
Lib10^4_#2 50_Jm^2 Selection	TAG_BX_TTCGCCCTTGAC	61	GG	AA	16	4	12	GG/AA	0.25	DNP
Lib10^4_#2 50_Jm^2 Selection	TAG_BX_TTCTAGGATGCG	130	CC	TT	64	47	8	CC/TT	0.7344	DNP
Lib10^4_#2 50_Jm^2 Selection	TAG_BX_TTCTCTCGGAAT	65	GG	AA	50	41	6	GG/AA	0.82	DNP
Lib10^4_#2 50_Jm^2 Selection	TAG_BX_TTGGAGTTCGGA	85	GG	AA	53	44	6	GG/AA	0.8302	DNP
Lib10^4_#2 50_Jm^2 Selection	TAG_BX_TTGGAGTTTTCT	64	GG	AA	36	30	6	GG/AA	0.8333	DNP
Lib10^4_#2 50_Jm^2 Selection	TAG_BX_TTGGCAGTTTGG	61	GG	AA	54	43	9	GG/AA	0.7963	DNP
Lib10^4_#2 50_Jm^2 Selection	TAG_BX_TTGGGTTTGTGG	130	CC	TT	23	17	4	CC/TT	0.7391	DNP
Lib10^4_#2 50_Jm^2 Selection	TAG_BX_TTGTAAATAACG	85	GG	AA	108	34	71	GG/AA	0.3148	DNP
Lib10^4_#2 50_Jm^2 Selection	TAG_BX_TTGTTTTAGTTT	119	AA	GT	67	46	14	AA/GT	0.6866	DNP
Lib10^4_#2 50_Jm^2 Selection	TAG_BX_TTGTTTTATCTC	121	GG	AA	39	28	8	GG/AA	0.7179	DNP
Lib10^4_#2 50_Jm^2 Selection	TAG_BX_TTTGACTAAGCA	65	GG	AA	92	79	6	GG/AA	0.8587	DNP
Lib10^4_#2 50_Jm^2 Selection	TAG_BX_TTTGCTTCGTCT	85	GG	AA	44	34	5	GG/AA	0.7727	DNP
Lib10^4_#2 50_Jm^2 Selection	TAG_BX_TTTGGCGTGCCT	121	GG	AA	59	41	8	GG/AA	0.6949	DNP
Lib10^4_#2 50_Jm^2 Selection	TAG_BX_TTTGTGGAGGCG	84	GG	AA	49	37	12	GG/AA	0.7551	DNP
Lib10^4_#2 50_Jm^2 Selection	TAG_BX_TTTTGATTTTGA	130	CC	TT	73	51	16	CC/TT	0.6986	DNP
Lib10^4_#2 50_Jm^2 Selection	TAG_BX_AAAAACCCTATG	130	C	T	54	38	16	C/T	0.7037	SNP
Lib10^4_#2 50_Jm^2 Selection	TAG_BX_AAACCTAGAATT	5	G	A	17	16	1	G/A	0.9412	SNP
Lib10^4_#2 50_Jm^2 Selection	TAG_BX_AAACGGTATTAA	130	C	T	135	107	22	C/T	0.7926	SNP
Lib10^4_#2 50_Jm^2 Selection	TAG_BX_AAAGCCATGTCC	131	C	T	64	17	46	C/T	0.2656	SNP
Lib10^4_#2 50_Jm^2 Selection	TAG_BX_AAAGCCATGTCC	118	G	A	64	42	22	G/A	0.6562	SNP
Lib10^4_#2 50_Jm^2 Selection	TAG_BX_AAAGCTTCACTC	131	C	T	26	23	3	C/T	0.8846	SNP
Lib10^4_#2 50_Jm^2 Selection	TAG_BX_AAATGGCAAGTT	131	C	T	68	55	13	C/T	0.8088	SNP
Lib10^4_#2 50_Jm^2 Selection	TAG_BX_AAATGTGCCGTG	5	G	A	14	14	0	G/A	1	SNP
Lib10^4_#2 50_Jm^2 Selection	TAG_BX_AACCGGACTCCA	130	C	A	91	49	38	C/A	0.5385	SNP
Lib10^4_#2 50_Jm^2 Selection	TAG_BX_AACGAAAGAGCT	118	G	A	24	20	3	G/A	0.8333	SNP
Lib10^4_#2 50_Jm^2 Selection	TAG_BX_AACGCCCCTAGT	121	G	A	46	36	10	G/A	0.7826	SNP
Lib10^4_#2 50_Jm^2 Selection	TAG_BX_AACTTGCGCGTG	130	C	T	73	62	10	C/T	0.8493	SNP
Lib10^4_#2 50_Jm^2 Selection	TAG_BX_AAGAGTTCCTGA	118	G	A	42	35	6	G/A	0.8333	SNP
Lib10^4_#2 50_Jm^2 Selection	TAG_BX_AAGCTTTATCGT	121	G	A	67	53	14	G/A	0.791	SNP
Lib10^4_#2 50_Jm^2 Selection	TAG_BX_AAGGTTCCACGG	130	C	T	47	6	6	C/T	0.1277	SNP
Lib10^4_#2 50_Jm^2 Selection	TAG_BX_AAGTAGGCCTTG	131	C	T	39	31	8	C/T	0.7949	SNP
Lib10^4_#2 50_Jm^2 Selection	TAG_BX_AAGTGTATGGCC	71	C	G	55	46	7	C/G	0.8364	SNP
Lib10^4_#2 50_Jm^2 Selection	TAG_BX_AATAAAGTCTGT	95	C	G	38	31	5	C/G	0.8158	SNP
Lib10^4_#2 50_Jm^2 Selection	TAG_BX_AATGGAACTCGC	5	G	C	27	23	4	G/C	0.8519	SNP
Lib10^4_#2 50_Jm^2 Selection	TAG_BX_AATGGAACTCGC	118	G	A	27	3	23	G/A	0.1111	SNP
Lib10^4_#2 50_Jm^2 Selection	TAG_BX_AATGGGGCCGCA	5	G	A	84	12	70	G/A	0.1429	SNP
Lib10^4_#2 50_Jm^2 Selection	TAG_BX_AATGGGGCCGCA	118	G	A	84	58	25	G/A	0.6905	SNP
Lib10^4_#2 50_Jm^2 Selection	TAG_BX_AATGTATTCGTG	131	C	T	38	35	3	C/T	0.9211	SNP
Lib10^4_#2 50_Jm^2 Selection	TAG_BX_AATTAGTGTACC	130	C	G	34	27	7	C/G	0.7941	SNP
Lib10^4_#2 50_Jm^2 Selection	TAG_BX_AATTCCACCGGA	5	G	C	18	17	1	G/C	0.9444	SNP
Lib10^4_#2 50_Jm^2 Selection	TAG_BX_AATTTTATAGTT	118	G	A	31	26	5	G/A	0.8387	SNP
Lib10^4_#2 50_Jm^2 Selection	TAG_BX_AATTTTGTAATG	85	G	A	41	28	12	G/A	0.6829	SNP
Lib10^4_#2 50_Jm^2 Selection	TAG_BX_AATTTTGTAATG	118	G	A	41	5	36	G/A	0.122	SNP
Lib10^4_#2 50_Jm^2 Selection	TAG_BX_ACACCGATCGAT	85	G	T	77	67	9	G/T	0.8701	SNP
Lib10^4_#2 50_Jm^2 Selection	TAG_BX_ACACTATAGAAT	131	C	T	32	29	3	C/T	0.9062	SNP
Lib10^4_#2 50_Jm^2 Selection	TAG_BX_ACAGAAACTTGT	5	G	A	92	15	77	G/A	0.163	SNP
Lib10^4_#2 50_Jm^2 Selection	TAG_BX_ACAGAAACTTGT	130	C	T	92	62	27	C/T	0.6739	SNP
Lib10^4_#2 50_Jm^2 Selection	TAG_BX_ACAGATGAGCTC	131	C	T	81	66	15	C/T	0.8148	SNP
Lib10^4_#2 50_Jm^2 Selection	TAG_BX_ACAGATGGGCAT	5	G	C	88	28	59	G/C	0.3182	SNP
Lib10^4_#2 50_Jm^2 Selection	TAG_BX_ACAGATGGGCAT	130	C	G	88	42	41	C/G	0.4773	SNP
Lib10^4_#2 50_Jm^2 Selection	TAG_BX_ACAGTGTTCTCC	118	G	A	56	43	11	G/A	0.7679	SNP
Lib10^4_#2 50_Jm^2 Selection	TAG_BX_ACATGAGCCGTT	118	G	A	86	68	18	G/A	0.7907	SNP
Lib10^4_#2 50_Jm^2 Selection	TAG_BX_ACCACTGCCTTA	131	C	T	70	61	8	C/T	0.8714	SNP
Lib10^4_#2 50_Jm^2 Selection	TAG_BX_ACCCATATGTCT	118	G	A	79	8	70	G/A	0.1013	SNP
Lib10^4_#2 50_Jm^2 Selection	TAG_BX_ACCCATATGTCT	131	C	T	79	62	15	C/T	0.7848	SNP
Lib10^4_#2 50_Jm^2 Selection	TAG_BX_ACCCATTTTTGT	131	C	T	29	26	3	C/T	0.8966	SNP
Lib10^4_#2 50_Jm^2 Selection	TAG_BX_ACCCCTGGTCTC	118	G	A	37	29	7	G/A	0.7838	SNP
Lib10^4_#2 50_Jm^2 Selection	TAG_BX_ACCGGATGATTG	122	G	A	33	25	7	G/A	0.7576	SNP
Lib10^4_#2 50_Jm^2 Selection	TAG_BX_ACCGGATGATTG	118	G	A	33	4	29	G/A	0.1212	SNP
Lib10^4_#2 50_Jm^2 Selection	TAG_BX_ACCGTAGAGGCG	130	C	T	74	10	10	C/T	0.1351	SNP
Lib10^4_#2 50_Jm^2 Selection	TAG_BX_ACCTACGGCTAG	121	G	A	26	22	4	G/A	0.8462	SNP
Lib10^4_#2 50_Jm^2 Selection	TAG_BX_ACGATTTGTTTC	71	C	G	45	34	7	C/G	0.7556	SNP
Lib10^4_#2 50_Jm^2 Selection	TAG_BX_ACGCGAGGAGTT	130	C	T	46	40	5	C/T	0.8696	SNP
Lib10^4_#2 50_Jm^2 Selection	TAG_BX_ACGGCGTCTATT	130	C	T	74	60	12	C/T	0.8108	SNP
Lib10^4_#2 50_Jm^2 Selection	TAG_BX_ACGGGGTTGCGT	118	G	A	49	41	7	G/A	0.8367	SNP
Lib10^4_#2 50_Jm^2 Selection	TAG_BX_ACGGGTTCGTTG	130	C	T	47	41	6	C/T	0.8723	SNP
Lib10^4_#2 50_Jm^2 Selection	TAG_BX_ACGGTAGGGTGT	121	G	A	25	5	3	G/A	0.2	SNP
Lib10^4_#2 50_Jm^2 Selection	TAG_BX_ACGTAATGACTG	131	C	T	77	66	11	C/T	0.8571	SNP
Lib10^4_#2 50_Jm^2 Selection	TAG_BX_ACGTCCATGCCC	71	C	G	23	20	3	C/G	0.8696	SNP
Lib10^4_#2 50_Jm^2 Selection	TAG_BX_ACTATGTGATGT	118	G	A	26	23	3	G/A	0.8846	SNP
Lib10^4_#2 50_Jm^2 Selection	TAG_BX_ACTCGTTCACTG	121	G	A	23	19	4	G/A	0.8261	SNP
Lib10^4_#2 50_Jm^2 Selection	TAG_BX_ACTCGTTTTTTG	122	G	A	38	36	2	G/A	0.9474	SNP
Lib10^4_#2 50_Jm^2 Selection	TAG_BX_ACTCGTTTTTTG	69	T	C	38	4	32	T/C	0.1053	SNP
Lib10^4_#2 50_Jm^2 Selection	TAG_BX_ACTCTCTATCGC	118	G	A	23	22	1	G/A	0.9565	SNP
Lib10^4_#2 50_Jm^2 Selection	TAG_BX_ACTGAAACGCCG	118	G	A	75	59	16	G/A	0.7867	SNP
Lib10^4_#2 50_Jm^2 Selection	TAG_BX_ACTGTACACCGC	121	G	A	76	60	15	G/A	0.7895	SNP
Lib10^4_#2 50_Jm^2 Selection	TAG_BX_ACTGTATGGGGG	131	C	T	63	52	11	C/T	0.8254	SNP
Lib10^4_#2 50_Jm^2 Selection	TAG_BX_ACTTATGCTGAT	85	G	T	55	46	8	G/T	0.8364	SNP
Lib10^4_#2 50_Jm^2 Selection	TAG_BX_ACTTGACTCTCT	131	C	T	53	39	12	C/T	0.7358	SNP
Lib10^4_#2 50_Jm^2 Selection	TAG_BX_ACTTTATCACTT	71	C	G	46	39	5	C/G	0.8478	SNP
Lib10^4_#2 50_Jm^2 Selection	TAG_BX_ACTTTTGGTATT	130	C	G	45	35	8	C/G	0.7778	SNP
Lib10^4_#2 50_Jm^2 Selection	TAG_BX_AGAAACTCTATG	131	C	T	16	15	1	C/T	0.9375	SNP
Lib10^4_#2 50_Jm^2 Selection	TAG_BX_AGAATTGATTGT	5	G	C	34	32	2	G/C	0.9412	SNP
Lib10^4_#2 50_Jm^2 Selection	TAG_BX_AGAATTTAAAGA	5	G	A	12	11	1	G/A	0.9167	SNP
Lib10^4_#2 50_Jm^2 Selection	TAG_BX_AGAATTTAAAGA	-6	C	T	12	10	1	C/T	0.8333	SNP
Lib10^4_#2 50_Jm^2 Selection	TAG_BX_AGAATTTAAAGA	69	T	C	12	3	9	T/C	0.25	SNP
Lib10^4_#2 50_Jm^2 Selection	TAG_BX_AGAGGGGATGTT	130	C	T	117	16	48	C/T	0.1368	SNP
Lib10^4_#2 50_Jm^2 Selection	TAG_BX_AGATGTTTTTCC	122	G	A	37	30	7	G/A	0.8108	SNP
Lib10^4_#2 50_Jm^2 Selection	TAG_BX_AGATTTTGAGCG	131	C	T	52	43	8	C/T	0.8269	SNP
Lib10^4_#2 50_Jm^2 Selection	TAG_BX_AGATTTTGAGCG	69	T	C	52	6	46	T/C	0.1154	SNP
Lib10^4_#2 50_Jm^2 Selection	TAG_BX_AGCCGATTTTTA	95	C	G	41	35	5	C/G	0.8537	SNP
Lib10^4_#2 50_Jm^2 Selection	TAG_BX_AGCGAGTTTATG	122	G	A	46	37	8	G/A	0.8043	SNP
Lib10^4_#2 50_Jm^2 Selection	TAG_BX_AGCGCCAGGTGT	121	G	A	30	25	5	G/A	0.8333	SNP
Lib10^4_#2 50_Jm^2 Selection	TAG_BX_AGCGTTATATTT	131	C	G	90	64	24	C/G	0.7111	SNP
Lib10^4_#2 50_Jm^2 Selection	TAG_BX_AGCTCTTTAGGT	101	C	G	23	22	1	C/G	0.9565	SNP
Lib10^4_#2 50_Jm^2 Selection	TAG_BX_AGCTTAGATGGT	5	G	A	12	11	1	G/A	0.9167	SNP
Lib10^4_#2 50_Jm^2 Selection	TAG_BX_AGGAAGATGCTC	131	C	T	68	54	14	C/T	0.7941	SNP
Lib10^4_#2 50_Jm^2 Selection	TAG_BX_AGGAGGTTTTGC	121	G	A	55	46	8	G/A	0.8364	SNP
Lib10^4_#2 50_Jm^2 Selection	TAG_BX_AGGCCGGCGCAC	85	G	A	25	19	5	G/A	0.76	SNP
Lib10^4_#2 50_Jm^2 Selection	TAG_BX_AGGCTTTATGTC	118	G	A	89	27	62	G/A	0.3034	SNP
Lib10^4_#2 50_Jm^2 Selection	TAG_BX_AGGCTTTATGTC	130	C	T	89	52	35	C/T	0.5843	SNP
Lib10^4_#2 50_Jm^2 Selection	TAG_BX_AGGGTTGTAATT	131	C	T	55	49	6	C/T	0.8909	SNP
Lib10^4_#2 50_Jm^2 Selection	TAG_BX_AGGTAGGTGAAT	126	G	T	33	22	11	G/T	0.6667	SNP
Lib10^4_#2 50_Jm^2 Selection	TAG_BX_AGGTGTGCGATC	131	C	T	58	49	9	C/T	0.8448	SNP
Lib10^4_#2 50_Jm^2 Selection	TAG_BX_AGGTTTGGAATT	130	C	T	51	40	10	C/T	0.7843	SNP
Lib10^4_#2 50_Jm^2 Selection	TAG_BX_AGGTTTTGGATG	130	C	T	18	16	2	C/T	0.8889	SNP
Lib10^4_#2 50_Jm^2 Selection	TAG_BX_AGTAATGTGTGA	85	G	A	56	51	5	G/A	0.9107	SNP
Lib10^4_#2 50_Jm^2 Selection	TAG_BX_AGTACGACCTAT	5	G	A	14	14	0	G/A	1	SNP
Lib10^4_#2 50_Jm^2 Selection	TAG_BX_AGTAGATTTGTT	86	G	C	36	34	2	G/C	0.9444	SNP
Lib10^4_#2 50_Jm^2 Selection	TAG_BX_AGTCGTCTTCAC	85	G	A	46	38	7	G/A	0.8261	SNP
Lib10^4_#2 50_Jm^2 Selection	TAG_BX_AGTCTAACGGTC	5	G	C	31	29	2	G/C	0.9355	SNP
Lib10^4_#2 50_Jm^2 Selection	TAG_BX_AGTCTCATCTGA	130	C	G	83	63	17	C/G	0.759	SNP
Lib10^4_#2 50_Jm^2 Selection	TAG_BX_AGTGAGATTAAT	118	G	A	35	27	8	G/A	0.7714	SNP
Lib10^4_#2 50_Jm^2 Selection	TAG_BX_AGTGCTACCATG	126	G	C	45	38	7	G/C	0.8444	SNP
Lib10^4_#2 50_Jm^2 Selection	TAG_BX_AGTGGGTTCTCT	118	G	A	15	2	13	G/A	0.1333	SNP
Lib10^4_#2 50_Jm^2 Selection	TAG_BX_AGTGTGGCCTCT	118	G	A	21	17	4	G/A	0.8095	SNP
Lib10^4_#2 50_Jm^2 Selection	TAG_BX_AGTTACAGTTAT	5	G	C	32	30	1	G/C	0.9375	SNP
Lib10^4_#2 50_Jm^2 Selection	TAG_BX_AGTTAGTGCCTG	121	G	A	25	18	7	G/A	0.72	SNP
Lib10^4_#2 50_Jm^2 Selection	TAG_BX_AGTTATATGGGA	131	C	T	30	26	4	C/T	0.8667	SNP
Lib10^4_#2 50_Jm^2 Selection	TAG_BX_AGTTATTGATTC	131	C	T	98	83	15	C/T	0.8469	SNP
Lib10^4_#2 50_Jm^2 Selection	TAG_BX_AGTTCAGAGCGG	130	C	T	49	39	10	C/T	0.7959	SNP
Lib10^4_#2 50_Jm^2 Selection	TAG_BX_AGTTCAGAGCGG	131	C	T	49	5	44	C/T	0.102	SNP
Lib10^4_#2 50_Jm^2 Selection	TAG_BX_AGTTCGATACGG	71	C	G	30	24	4	C/G	0.8	SNP
Lib10^4_#2 50_Jm^2 Selection	TAG_BX_AGTTCGGTACCT	134	C	G	51	36	15	C/G	0.7059	SNP
Lib10^4_#2 50_Jm^2 Selection	TAG_BX_AGTTGCACCTAG	71	C	G	70	64	5	C/G	0.9143	SNP
Lib10^4_#2 50_Jm^2 Selection	TAG_BX_AGTTGGCCGGAT	85	G	A	31	26	4	G/A	0.8387	SNP
Lib10^4_#2 50_Jm^2 Selection	TAG_BX_AGTTTAGCGGAG	95	C	G	31	27	4	C/G	0.871	SNP
Lib10^4_#2 50_Jm^2 Selection	TAG_BX_AGTTTATAGGAA	130	C	T	23	21	2	C/T	0.913	SNP
Lib10^4_#2 50_Jm^2 Selection	TAG_BX_ATAAAAATCAGA	118	G	A	22	18	4	G/A	0.8182	SNP
Lib10^4_#2 50_Jm^2 Selection	TAG_BX_ATAAATCGCCGG	130	C	T	29	21	8	C/T	0.7241	SNP
Lib10^4_#2 50_Jm^2 Selection	TAG_BX_ATAAATGTACTT	118	G	A	39	35	4	G/A	0.8974	SNP
Lib10^4_#2 50_Jm^2 Selection	TAG_BX_ATAAATTGGTGC	131	C	T	27	22	5	C/T	0.8148	SNP
Lib10^4_#2 50_Jm^2 Selection	TAG_BX_ATAAGTCGTTTA	131	C	T	12	10	2	C/T	0.8333	SNP
Lib10^4_#2 50_Jm^2 Selection	TAG_BX_ATAATGGCTTTC	121	G	A	50	43	6	G/A	0.86	SNP
Lib10^4_#2 50_Jm^2 Selection	TAG_BX_ATACTAGGTGCA	121	G	A	60	27	32	G/A	0.45	SNP
Lib10^4_#2 50_Jm^2 Selection	TAG_BX_ATACTAGGTGCA	126	G	T	60	21	39	G/T	0.35	SNP
Lib10^4_#2 50_Jm^2 Selection	TAG_BX_ATACTCCTTCCC	5	G	A	12	12	0	G/A	1	SNP
Lib10^4_#2 50_Jm^2 Selection	TAG_BX_ATAGACTAAACG	130	C	T	48	40	7	C/T	0.8333	SNP
Lib10^4_#2 50_Jm^2 Selection	TAG_BX_ATAGCAAAGAAT	131	C	T	25	23	2	C/T	0.92	SNP
Lib10^4_#2 50_Jm^2 Selection	TAG_BX_ATAGCGAGTGAT	118	G	A	33	30	3	G/A	0.9091	SNP
Lib10^4_#2 50_Jm^2 Selection	TAG_BX_ATAGGAAAACTG	118	G	A	35	28	6	G/A	0.8	SNP
Lib10^4_#2 50_Jm^2 Selection	TAG_BX_ATAGGAGATTGG	5	G	A	42	37	5	G/A	0.881	SNP
Lib10^4_#2 50_Jm^2 Selection	TAG_BX_ATATAAATGGAT	118	G	A	73	65	7	G/A	0.8904	SNP
Lib10^4_#2 50_Jm^2 Selection	TAG_BX_ATATATTTATTG	131	C	T	24	20	4	C/T	0.8333	SNP
Lib10^4_#2 50_Jm^2 Selection	TAG_BX_ATATCGGAATTA	5	G	A	15	14	1	G/A	0.9333	SNP
Lib10^4_#2 50_Jm^2 Selection	TAG_BX_ATATGGTGTTAC	131	C	T	80	69	10	C/T	0.8625	SNP
Lib10^4_#2 50_Jm^2 Selection	TAG_BX_ATATGTTGTGGA	118	G	A	24	21	3	G/A	0.875	SNP
Lib10^4_#2 50_Jm^2 Selection	TAG_BX_ATATTTGTGCGG	5	G	T	19	16	3	G/T	0.8421	SNP
Lib10^4_#2 50_Jm^2 Selection	TAG_BX_ATATTTGTGCGG	118	G	A	19	2	17	G/A	0.1053	SNP
Lib10^4_#2 50_Jm^2 Selection	TAG_BX_ATATTTGTGCGG	91	G	A	19	3	16	G/A	0.1579	SNP
Lib10^4_#2 50_Jm^2 Selection	TAG_BX_ATCAAACCGGTG	131	C	T	45	39	5	C/T	0.8667	SNP
Lib10^4_#2 50_Jm^2 Selection	TAG_BX_ATCAAGGGATTA	118	G	A	36	32	4	G/A	0.8889	SNP
Lib10^4_#2 50_Jm^2 Selection	TAG_BX_ATCATTGATGGT	130	C	A	43	34	7	C/A	0.7907	SNP
Lib10^4_#2 50_Jm^2 Selection	TAG_BX_ATCCGGTATCGA	118	G	A	37	32	4	G/A	0.8649	SNP
Lib10^4_#2 50_Jm^2 Selection	TAG_BX_ATCCGGTATCGA	69	T	C	37	5	32	T/C	0.1351	SNP
Lib10^4_#2 50_Jm^2 Selection	TAG_BX_ATCGGTGGGATT	130	C	T	73	16	6	C/T	0.2192	SNP
Lib10^4_#2 50_Jm^2 Selection	TAG_BX_ATCGTACAAGAT	5	G	C	86	60	26	G/C	0.6977	SNP
Lib10^4_#2 50_Jm^2 Selection	TAG_BX_ATCGTACAAGAT	85	G	A	86	19	67	G/A	0.2209	SNP
Lib10^4_#2 50_Jm^2 Selection	TAG_BX_ATCTAAGTGCCT	85	G	A	17	16	1	G/A	0.9412	SNP
Lib10^4_#2 50_Jm^2 Selection	TAG_BX_ATCTACCTTGGT	85	G	A	20	14	6	G/A	0.7	SNP
Lib10^4_#2 50_Jm^2 Selection	TAG_BX_ATCTTGAGGGGC	118	G	A	74	63	10	G/A	0.8514	SNP
Lib10^4_#2 50_Jm^2 Selection	TAG_BX_ATGATCGTTTTC	131	C	T	29	21	8	C/T	0.7241	SNP
Lib10^4_#2 50_Jm^2 Selection	TAG_BX_ATGATCGTTTTC	118	G	A	29	3	26	G/A	0.1034	SNP
Lib10^4_#2 50_Jm^2 Selection	TAG_BX_ATGATTATGGTC	130	C	T	56	46	10	C/T	0.8214	SNP
Lib10^4_#2 50_Jm^2 Selection	TAG_BX_ATGATTGGTGAT	118	G	A	22	4	18	G/A	0.1818	SNP
Lib10^4_#2 50_Jm^2 Selection	TAG_BX_ATGATTGGTGAT	130	C	A	22	16	6	C/A	0.7273	SNP
Lib10^4_#2 50_Jm^2 Selection	TAG_BX_ATGCAACCACGA	118	G	A	55	50	3	G/A	0.9091	SNP
Lib10^4_#2 50_Jm^2 Selection	TAG_BX_ATGCGGTTGGTA	121	G	A	30	23	7	G/A	0.7667	SNP
Lib10^4_#2 50_Jm^2 Selection	TAG_BX_ATGCTCGTGGCG	95	C	G	21	20	1	C/G	0.9524	SNP
Lib10^4_#2 50_Jm^2 Selection	TAG_BX_ATGGGAGTGATG	91	G	C	31	27	3	G/C	0.871	SNP
Lib10^4_#2 50_Jm^2 Selection	TAG_BX_ATGGGGGGGATC	118	G	A	43	36	7	G/A	0.8372	SNP
Lib10^4_#2 50_Jm^2 Selection	TAG_BX_ATGGTCTTTATG	130	C	T	170	54	114	C/T	0.3176	SNP
Lib10^4_#2 50_Jm^2 Selection	TAG_BX_ATGGTCTTTATG	121	G	T	170	53	83	G/T	0.3118	SNP
Lib10^4_#2 50_Jm^2 Selection	TAG_BX_ATGGTCTTTATG	121	G	A	170	34	83	G/A	0.2	SNP
Lib10^4_#2 50_Jm^2 Selection	TAG_BX_ATGGTTATGCCT	101	C	A	43	37	6	C/A	0.8605	SNP
Lib10^4_#2 50_Jm^2 Selection	TAG_BX_ATGGTTGTGATT	130	C	T	37	6	4	C/T	0.1622	SNP
Lib10^4_#2 50_Jm^2 Selection	TAG_BX_ATGTCACTGGAC	131	C	T	45	36	9	C/T	0.8	SNP
Lib10^4_#2 50_Jm^2 Selection	TAG_BX_ATGTCATAGGGC	131	C	G	14	11	2	C/G	0.7857	SNP
Lib10^4_#2 50_Jm^2 Selection	TAG_BX_ATGTGGGGGGTG	130	C	T	30	3	4	C/T	0.1	SNP
Lib10^4_#2 50_Jm^2 Selection	TAG_BX_ATGTGTAATGTA	130	C	T	46	39	6	C/T	0.8478	SNP
Lib10^4_#2 50_Jm^2 Selection	TAG_BX_ATGTTACGTTCA	85	G	A	66	62	4	G/A	0.9394	SNP
Lib10^4_#2 50_Jm^2 Selection	TAG_BX_ATGTTTTTTAGC	122	G	A	49	43	6	G/A	0.8776	SNP
Lib10^4_#2 50_Jm^2 Selection	TAG_BX_ATTACTCGTCCC	5	G	A	32	30	1	G/A	0.9375	SNP
Lib10^4_#2 50_Jm^2 Selection	TAG_BX_ATTAGTGCTTTG	123	T	C	67	25	41	T/C	0.3731	SNP
Lib10^4_#2 50_Jm^2 Selection	TAG_BX_ATTAGTGCTTTG	131	C	T	67	29	36	C/T	0.4328	SNP
Lib10^4_#2 50_Jm^2 Selection	TAG_BX_ATTATTATAGTG	121	G	A	34	28	6	G/A	0.8235	SNP
Lib10^4_#2 50_Jm^2 Selection	TAG_BX_ATTATTGTTATC	130	C	T	35	5	30	C/T	0.1429	SNP
Lib10^4_#2 50_Jm^2 Selection	TAG_BX_ATTATTTTCCTC	130	C	G	28	27	1	C/G	0.9643	SNP
Lib10^4_#2 50_Jm^2 Selection	TAG_BX_ATTCATGACGTG	130	C	T	57	46	9	C/T	0.807	SNP
Lib10^4_#2 50_Jm^2 Selection	TAG_BX_ATTCCATGCCTG	85	G	A	50	41	9	G/A	0.82	SNP
Lib10^4_#2 50_Jm^2 Selection	TAG_BX_ATTCTGCATAGC	69	T	C	32	6	25	T/C	0.1875	SNP
Lib10^4_#2 50_Jm^2 Selection	TAG_BX_ATTCTGCATAGC	118	G	A	32	27	5	G/A	0.8438	SNP
Lib10^4_#2 50_Jm^2 Selection	TAG_BX_ATTGATCCTTAC	130	C	T	25	22	3	C/T	0.88	SNP
Lib10^4_#2 50_Jm^2 Selection	TAG_BX_ATTGATGCGTAC	-12	C	G	20	20	0	C/G	1	SNP
Lib10^4_#2 50_Jm^2 Selection	TAG_BX_ATTGCTGCTAGG	121	G	A	37	29	8	G/A	0.7838	SNP
Lib10^4_#2 50_Jm^2 Selection	TAG_BX_ATTGTGAGCTTT	118	G	A	60	50	10	G/A	0.8333	SNP
Lib10^4_#2 50_Jm^2 Selection	TAG_BX_ATTGTTCTCCTG	5	G	C	47	41	5	G/C	0.8723	SNP
Lib10^4_#2 50_Jm^2 Selection	TAG_BX_ATTGTTGCAAGT	5	G	A	13	12	1	G/A	0.9231	SNP
Lib10^4_#2 50_Jm^2 Selection	TAG_BX_ATTGTTTTGGAT	95	C	G	34	30	3	C/G	0.8824	SNP
Lib10^4_#2 50_Jm^2 Selection	TAG_BX_ATTTAACGGACT	130	C	T	21	16	4	C/T	0.7619	SNP
Lib10^4_#2 50_Jm^2 Selection	TAG_BX_ATTTCCATTTGA	118	G	A	32	28	4	G/A	0.875	SNP
Lib10^4_#2 50_Jm^2 Selection	TAG_BX_ATTTCTCATTGA	131	C	T	64	58	5	C/T	0.9062	SNP
Lib10^4_#2 50_Jm^2 Selection	TAG_BX_ATTTCTTCGCCC	130	C	T	66	55	7	C/T	0.8333	SNP
Lib10^4_#2 50_Jm^2 Selection	TAG_BX_ATTTGTTCTCTG	5	G	A	36	35	1	G/A	0.9722	SNP
Lib10^4_#2 50_Jm^2 Selection	TAG_BX_ATTTTCACTAAT	5	G	A	18	16	2	G/A	0.8889	SNP
Lib10^4_#2 50_Jm^2 Selection	TAG_BX_ATTTTTAATTTC	130	C	T	78	11	9	C/T	0.141	SNP
Lib10^4_#2 50_Jm^2 Selection	TAG_BX_CAAATCTCCATA	130	C	T	21	19	2	C/T	0.9048	SNP
Lib10^4_#2 50_Jm^2 Selection	TAG_BX_CAACAATTGTAG	130	C	T	94	16	10	C/T	0.1702	SNP
Lib10^4_#2 50_Jm^2 Selection	TAG_BX_CAACCATGTTCG	-12	C	G	30	28	2	C/G	0.9333	SNP
Lib10^4_#2 50_Jm^2 Selection	TAG_BX_CAACGGTGATGT	131	C	T	17	13	3	C/T	0.7647	SNP
Lib10^4_#2 50_Jm^2 Selection	TAG_BX_CAACGGTGATGT	58	T	G	17	2	14	T/G	0.1176	SNP
Lib10^4_#2 50_Jm^2 Selection	TAG_BX_CAAGAAAGTTTC	118	G	A	42	37	4	G/A	0.881	SNP
Lib10^4_#2 50_Jm^2 Selection	TAG_BX_CAAGGTTCTTCA	121	G	A	54	41	13	G/A	0.7593	SNP
Lib10^4_#2 50_Jm^2 Selection	TAG_BX_CAAGTATTCTCA	-12	C	G	16	16	0	C/G	1	SNP
Lib10^4_#2 50_Jm^2 Selection	TAG_BX_CAAGTTGAAGAC	131	C	T	22	17	5	C/T	0.7727	SNP
Lib10^4_#2 50_Jm^2 Selection	TAG_BX_CAAGTTGAAGAC	55	A	C	22	3	19	A/C	0.1364	SNP
Lib10^4_#2 50_Jm^2 Selection	TAG_BX_CAATAGGAAGTT	123	T	C	26	22	4	T/C	0.8462	SNP
Lib10^4_#2 50_Jm^2 Selection	TAG_BX_CAATGCTTCCGA	130	C	T	37	32	4	C/T	0.8649	SNP
Lib10^4_#2 50_Jm^2 Selection	TAG_BX_CAATGTTTATGT	5	G	A	28	27	1	G/A	0.9643	SNP
Lib10^4_#2 50_Jm^2 Selection	TAG_BX_CAATTCAGTACT	118	G	A	25	21	4	G/A	0.84	SNP
Lib10^4_#2 50_Jm^2 Selection	TAG_BX_CAATTCTATAGA	-12	C	G	19	19	0	C/G	1	SNP
Lib10^4_#2 50_Jm^2 Selection	TAG_BX_CAATTTACCTGG	82	A	G	94	26	68	A/G	0.2766	SNP
Lib10^4_#2 50_Jm^2 Selection	TAG_BX_CAATTTACCTGG	118	G	A	94	17	77	G/A	0.1809	SNP
Lib10^4_#2 50_Jm^2 Selection	TAG_BX_CAATTTACCTGG	130	C	T	94	42	51	C/T	0.4468	SNP
Lib10^4_#2 50_Jm^2 Selection	TAG_BX_CACATCTAGTGG	85	G	A	66	58	8	G/A	0.8788	SNP
Lib10^4_#2 50_Jm^2 Selection	TAG_BX_CACATGCTCCTT	118	G	A	30	24	6	G/A	0.8	SNP
Lib10^4_#2 50_Jm^2 Selection	TAG_BX_CACGCTTAGGGC	131	C	G	53	50	2	C/G	0.9434	SNP
Lib10^4_#2 50_Jm^2 Selection	TAG_BX_CACGTCATTATT	131	C	T	67	57	10	C/T	0.8507	SNP
Lib10^4_#2 50_Jm^2 Selection	TAG_BX_CACGTCATTATT	-59	C	T	67	67	0	C/T	1	SNP
Lib10^4_#2 50_Jm^2 Selection	TAG_BX_CAGAACTGTCTG	117	C	T	13	12	1	C/T	0.9231	SNP
Lib10^4_#2 50_Jm^2 Selection	TAG_BX_CAGACCATATAC	5	G	C	26	25	1	G/C	0.9615	SNP
Lib10^4_#2 50_Jm^2 Selection	TAG_BX_CAGCAGTACGTT	95	C	G	87	52	35	C/G	0.5977	SNP
Lib10^4_#2 50_Jm^2 Selection	TAG_BX_CAGCCACCGCGA	118	G	A	14	3	11	G/A	0.2143	SNP
Lib10^4_#2 50_Jm^2 Selection	TAG_BX_CAGCCGGAGTAG	131	C	T	22	19	3	C/T	0.8636	SNP
Lib10^4_#2 50_Jm^2 Selection	TAG_BX_CAGCCGTGTTGA	5	G	C	13	11	2	G/C	0.8462	SNP
Lib10^4_#2 50_Jm^2 Selection	TAG_BX_CAGCCGTGTTGA	55	A	C	13	2	11	A/C	0.1538	SNP
Lib10^4_#2 50_Jm^2 Selection	TAG_BX_CAGCCTTATTTG	118	G	A	65	55	10	G/A	0.8462	SNP
Lib10^4_#2 50_Jm^2 Selection	TAG_BX_CAGCGGAGGTCG	121	G	A	25	24	1	G/A	0.96	SNP
Lib10^4_#2 50_Jm^2 Selection	TAG_BX_CAGGCATCTATT	77	G	C	41	33	7	G/C	0.8049	SNP
Lib10^4_#2 50_Jm^2 Selection	TAG_BX_CAGGCTGATACT	118	G	A	40	36	4	G/A	0.9	SNP
Lib10^4_#2 50_Jm^2 Selection	TAG_BX_CAGGGCCAGTCG	130	C	T	31	26	5	C/T	0.8387	SNP
Lib10^4_#2 50_Jm^2 Selection	TAG_BX_CAGGGCTGTCAT	126	G	T	80	62	18	G/T	0.775	SNP
Lib10^4_#2 50_Jm^2 Selection	TAG_BX_CAGTGGGTTCTC	131	C	T	21	16	5	C/T	0.7619	SNP
Lib10^4_#2 50_Jm^2 Selection	TAG_BX_CAGTGTTTCTTT	118	G	A	65	50	14	G/A	0.7692	SNP
Lib10^4_#2 50_Jm^2 Selection	TAG_BX_CAGTTTTTCGAT	131	C	G	38	27	7	C/G	0.7105	SNP
Lib10^4_#2 50_Jm^2 Selection	TAG_BX_CATACATTGAAT	131	C	T	60	53	6	C/T	0.8833	SNP
Lib10^4_#2 50_Jm^2 Selection	TAG_BX_CATCCTGTTGTC	131	C	T	53	40	12	C/T	0.7547	SNP
Lib10^4_#2 50_Jm^2 Selection	TAG_BX_CATGCTCGTTAC	118	G	A	55	45	10	G/A	0.8182	SNP
Lib10^4_#2 50_Jm^2 Selection	TAG_BX_CATGGTTTGCCG	134	C	G	65	50	15	C/G	0.7692	SNP
Lib10^4_#2 50_Jm^2 Selection	TAG_BX_CATGTGCACGTT	118	G	A	12	10	2	G/A	0.8333	SNP
Lib10^4_#2 50_Jm^2 Selection	TAG_BX_CATGTGTATAGA	118	G	A	53	41	12	G/A	0.7736	SNP
Lib10^4_#2 50_Jm^2 Selection	TAG_BX_CATTATCTTTCG	118	G	T	17	15	2	G/T	0.8824	SNP
Lib10^4_#2 50_Jm^2 Selection	TAG_BX_CATTGTCTTTGC	118	G	A	63	48	15	G/A	0.7619	SNP
Lib10^4_#2 50_Jm^2 Selection	TAG_BX_CATTTTCGTGTA	5	G	C	36	36	0	G/C	1	SNP
Lib10^4_#2 50_Jm^2 Selection	TAG_BX_CCAAGTACACAT	85	G	A	31	29	2	G/A	0.9355	SNP
Lib10^4_#2 50_Jm^2 Selection	TAG_BX_CCACTTTGATTG	118	G	A	58	50	8	G/A	0.8621	SNP
Lib10^4_#2 50_Jm^2 Selection	TAG_BX_CCAGACTTACTT	85	G	A	36	34	2	G/A	0.9444	SNP
Lib10^4_#2 50_Jm^2 Selection	TAG_BX_CCAGCGGTCATG	118	G	A	54	42	11	G/A	0.7778	SNP
Lib10^4_#2 50_Jm^2 Selection	TAG_BX_CCAGTGCTCCTT	85	G	A	51	44	7	G/A	0.8627	SNP
Lib10^4_#2 50_Jm^2 Selection	TAG_BX_CCATGGTCGATC	121	G	A	84	70	14	G/A	0.8333	SNP
Lib10^4_#2 50_Jm^2 Selection	TAG_BX_CCATTATTTCTT	85	G	A	40	35	4	G/A	0.875	SNP
Lib10^4_#2 50_Jm^2 Selection	TAG_BX_CCCGCCTGTCAT	117	C	T	15	9	6	C/T	0.6	SNP
Lib10^4_#2 50_Jm^2 Selection	TAG_BX_CCCGCGTCCAGG	122	G	A	65	52	13	G/A	0.8	SNP
Lib10^4_#2 50_Jm^2 Selection	TAG_BX_CCCGCTAAGCCA	95	C	G	77	68	9	C/G	0.8831	SNP
Lib10^4_#2 50_Jm^2 Selection	TAG_BX_CCCGGCGAGTCA	5	G	C	51	48	3	G/C	0.9412	SNP
Lib10^4_#2 50_Jm^2 Selection	TAG_BX_CCGCACATGGCT	118	G	A	38	33	4	G/A	0.8684	SNP
Lib10^4_#2 50_Jm^2 Selection	TAG_BX_CCGGCATAGTAG	131	C	T	81	71	10	C/T	0.8765	SNP
Lib10^4_#2 50_Jm^2 Selection	TAG_BX_CCGGGTGGTACT	86	G	C	116	42	72	G/C	0.3621	SNP
Lib10^4_#2 50_Jm^2 Selection	TAG_BX_CCGGGTGGTACT	118	G	A	116	55	60	G/A	0.4741	SNP
Lib10^4_#2 50_Jm^2 Selection	TAG_BX_CCGGGTTGGGAA	118	G	A	39	36	3	G/A	0.9231	SNP
Lib10^4_#2 50_Jm^2 Selection	TAG_BX_CCGGTCGTGGTT	130	C	T	40	35	5	C/T	0.875	SNP
Lib10^4_#2 50_Jm^2 Selection	TAG_BX_CCGGTTGGCTGC	131	C	T	136	117	18	C/T	0.8603	SNP
Lib10^4_#2 50_Jm^2 Selection	TAG_BX_CCGTACCTTGGA	118	G	A	24	18	6	G/A	0.75	SNP
Lib10^4_#2 50_Jm^2 Selection	TAG_BX_CCGTTGGGACGG	5	G	A	25	23	2	G/A	0.92	SNP
Lib10^4_#2 50_Jm^2 Selection	TAG_BX_CCTACCAGGGCA	118	G	A	51	47	4	G/A	0.9216	SNP
Lib10^4_#2 50_Jm^2 Selection	TAG_BX_CCTATTCATCAG	96	T	G	51	15	35	T/G	0.2941	SNP
Lib10^4_#2 50_Jm^2 Selection	TAG_BX_CCTATTCATCAG	118	G	A	51	27	24	G/A	0.5294	SNP
Lib10^4_#2 50_Jm^2 Selection	TAG_BX_CCTATTTCAGTT	130	C	T	40	32	8	C/T	0.8	SNP
Lib10^4_#2 50_Jm^2 Selection	TAG_BX_CCTCAGTGTGTG	5	G	A	20	20	0	G/A	1	SNP
Lib10^4_#2 50_Jm^2 Selection	TAG_BX_CCTCCTTTTGGT	130	C	T	46	38	8	C/T	0.8261	SNP
Lib10^4_#2 50_Jm^2 Selection	TAG_BX_CCTCGGTTTGAT	71	C	A	40	28	9	C/A	0.7	SNP
Lib10^4_#2 50_Jm^2 Selection	TAG_BX_CCTCTGTTTGTT	118	G	A	24	18	6	G/A	0.75	SNP
Lib10^4_#2 50_Jm^2 Selection	TAG_BX_CCTGAGGGCTGT	85	G	A	118	55	62	G/A	0.4661	SNP
Lib10^4_#2 50_Jm^2 Selection	TAG_BX_CCTGAGGGCTGT	130	C	T	118	47	68	C/T	0.3983	SNP
Lib10^4_#2 50_Jm^2 Selection	TAG_BX_CCTGCTCCTTTG	5	G	A	16	14	2	G/A	0.875	SNP
Lib10^4_#2 50_Jm^2 Selection	TAG_BX_CCTGCTGTTCGC	130	C	T	48	37	10	C/T	0.7708	SNP
Lib10^4_#2 50_Jm^2 Selection	TAG_BX_CCTGTTAGTTTG	118	G	A	116	96	20	G/A	0.8276	SNP
Lib10^4_#2 50_Jm^2 Selection	TAG_BX_CCTTAAACGGAG	118	G	A	51	43	7	G/A	0.8431	SNP
Lib10^4_#2 50_Jm^2 Selection	TAG_BX_CCTTATGAGTGC	130	C	T	18	15	3	C/T	0.8333	SNP
Lib10^4_#2 50_Jm^2 Selection	TAG_BX_CGAAAACGCGCC	-12	C	G	25	25	0	C/G	1	SNP
Lib10^4_#2 50_Jm^2 Selection	TAG_BX_CGAAATGCCTGA	118	G	A	53	42	9	G/A	0.7925	SNP
Lib10^4_#2 50_Jm^2 Selection	TAG_BX_CGACATCCCTCT	121	G	A	33	28	5	G/A	0.8485	SNP
Lib10^4_#2 50_Jm^2 Selection	TAG_BX_CGACGGAGATTT	5	G	C	29	29	0	G/C	1	SNP
Lib10^4_#2 50_Jm^2 Selection	TAG_BX_CGACGGAGATTT	55	A	C	29	3	26	A/C	0.1034	SNP
Lib10^4_#2 50_Jm^2 Selection	TAG_BX_CGAGCGAAGATC	130	C	T	49	44	4	C/T	0.898	SNP
Lib10^4_#2 50_Jm^2 Selection	TAG_BX_CGAGGTCTTGTG	118	G	A	31	25	5	G/A	0.8065	SNP
Lib10^4_#2 50_Jm^2 Selection	TAG_BX_CGAGTTGTAGAT	71	C	A	88	72	14	C/A	0.8182	SNP
Lib10^4_#2 50_Jm^2 Selection	TAG_BX_CGATCAAGGCTA	5	G	T	19	17	2	G/T	0.8947	SNP
Lib10^4_#2 50_Jm^2 Selection	TAG_BX_CGATCAAGTGCG	126	G	C	81	60	21	G/C	0.7407	SNP
Lib10^4_#2 50_Jm^2 Selection	TAG_BX_CGCAATGGCGTC	118	G	A	52	43	9	G/A	0.8269	SNP
Lib10^4_#2 50_Jm^2 Selection	TAG_BX_CGCAGGCCTTTT	130	C	T	182	30	16	C/T	0.1648	SNP
Lib10^4_#2 50_Jm^2 Selection	TAG_BX_CGCCCCAAATCA	86	G	C	83	75	8	G/C	0.9036	SNP
Lib10^4_#2 50_Jm^2 Selection	TAG_BX_CGCCCCACCAGG	130	C	T	105	41	63	C/T	0.3905	SNP
Lib10^4_#2 50_Jm^2 Selection	TAG_BX_CGCCCCACCAGG	121	G	A	105	43	62	G/A	0.4095	SNP
Lib10^4_#2 50_Jm^2 Selection	TAG_BX_CGCGGCTCCGCT	118	G	A	44	38	6	G/A	0.8636	SNP
Lib10^4_#2 50_Jm^2 Selection	TAG_BX_CGCTAATAGTTT	131	C	T	15	11	4	C/T	0.7333	SNP
Lib10^4_#2 50_Jm^2 Selection	TAG_BX_CGCTCCACTAAG	130	C	T	42	29	9	C/T	0.6905	SNP
Lib10^4_#2 50_Jm^2 Selection	TAG_BX_CGCTCCCATTGC	131	C	T	56	47	7	C/T	0.8393	SNP
Lib10^4_#2 50_Jm^2 Selection	TAG_BX_CGCTCTCCTGGC	118	G	A	75	61	13	G/A	0.8133	SNP
Lib10^4_#2 50_Jm^2 Selection	TAG_BX_CGCTCTGGTAGA	85	G	A	47	39	8	G/A	0.8298	SNP
Lib10^4_#2 50_Jm^2 Selection	TAG_BX_CGCTGGGGGGTC	118	G	A	51	42	9	G/A	0.8235	SNP
Lib10^4_#2 50_Jm^2 Selection	TAG_BX_CGCTGGTTCACG	118	G	A	48	41	4	G/A	0.8542	SNP
Lib10^4_#2 50_Jm^2 Selection	TAG_BX_CGGACGTCATGT	91	G	C	33	24	9	G/C	0.7273	SNP
Lib10^4_#2 50_Jm^2 Selection	TAG_BX_CGGAGCACATAA	118	G	A	52	41	10	G/A	0.7885	SNP
Lib10^4_#2 50_Jm^2 Selection	TAG_BX_CGGATCTTTGGT	118	G	A	61	52	8	G/A	0.8525	SNP
Lib10^4_#2 50_Jm^2 Selection	TAG_BX_CGGCCATTGCCC	118	G	A	34	28	5	G/A	0.8235	SNP
Lib10^4_#2 50_Jm^2 Selection	TAG_BX_CGGGACCTTAGA	85	G	A	53	47	3	G/A	0.8868	SNP
Lib10^4_#2 50_Jm^2 Selection	TAG_BX_CGGGACCTTAGA	181	G	A	53	47	6	G/A	0.8868	SNP
Lib10^4_#2 50_Jm^2 Selection	TAG_BX_CGGGATTCTCAA	12	T	C	57	53	4	T/C	0.9298	SNP
Lib10^4_#2 50_Jm^2 Selection	TAG_BX_CGGGCTTTGTCA	5	G	C	26	24	2	G/C	0.9231	SNP
Lib10^4_#2 50_Jm^2 Selection	TAG_BX_CGGGGGGCCACA	5	G	A	15	14	1	G/A	0.9333	SNP
Lib10^4_#2 50_Jm^2 Selection	TAG_BX_CGGGGTTTTGAA	5	G	C	60	56	4	G/C	0.9333	SNP
Lib10^4_#2 50_Jm^2 Selection	TAG_BX_CGGGTTTGCGCT	85	G	A	77	68	9	G/A	0.8831	SNP
Lib10^4_#2 50_Jm^2 Selection	TAG_BX_CGGTAAAATGTC	5	G	A	51	7	44	G/A	0.1373	SNP
Lib10^4_#2 50_Jm^2 Selection	TAG_BX_CGGTAAAATGTC	118	G	A	51	35	15	G/A	0.6863	SNP
Lib10^4_#2 50_Jm^2 Selection	TAG_BX_CGGTCTATCTAG	95	C	G	22	17	5	C/G	0.7727	SNP
Lib10^4_#2 50_Jm^2 Selection	TAG_BX_CGGTGTCGTGTG	5	G	C	32	30	2	G/C	0.9375	SNP
Lib10^4_#2 50_Jm^2 Selection	TAG_BX_CGTAGTGATGAC	131	C	T	48	43	5	C/T	0.8958	SNP
Lib10^4_#2 50_Jm^2 Selection	TAG_BX_CGTATTTTGTGT	131	C	T	62	56	6	C/T	0.9032	SNP
Lib10^4_#2 50_Jm^2 Selection	TAG_BX_CGTATTTTGTGT	69	T	C	62	7	55	T/C	0.1129	SNP
Lib10^4_#2 50_Jm^2 Selection	TAG_BX_CGTCACATCTGC	130	C	T	58	43	14	C/T	0.7414	SNP
Lib10^4_#2 50_Jm^2 Selection	TAG_BX_CGTCCGCCGATG	5	G	C	30	29	1	G/C	0.9667	SNP
Lib10^4_#2 50_Jm^2 Selection	TAG_BX_CGTCCGGGCAAC	97	A	G	19	14	5	A/G	0.7368	SNP
Lib10^4_#2 50_Jm^2 Selection	TAG_BX_CGTCCGGGCAAC	131	C	T	19	2	17	C/T	0.1053	SNP
Lib10^4_#2 50_Jm^2 Selection	TAG_BX_CGTCTTACTGCA	131	C	A	22	17	5	C/A	0.7727	SNP
Lib10^4_#2 50_Jm^2 Selection	TAG_BX_CGTGATGTTGAT	118	G	A	26	23	2	G/A	0.8846	SNP
Lib10^4_#2 50_Jm^2 Selection	TAG_BX_CGTGGTGTATTG	118	G	A	83	67	15	G/A	0.8072	SNP
Lib10^4_#2 50_Jm^2 Selection	TAG_BX_CGTGTTGGATTG	118	G	A	35	28	7	G/A	0.8	SNP
Lib10^4_#2 50_Jm^2 Selection	TAG_BX_CGTTCATACTAC	5	G	A	49	47	2	G/A	0.9592	SNP
Lib10^4_#2 50_Jm^2 Selection	TAG_BX_CGTTCTACTCGT	5	G	A	16	15	1	G/A	0.9375	SNP
Lib10^4_#2 50_Jm^2 Selection	TAG_BX_CGTTGCTAGGTA	86	G	C	78	63	13	G/C	0.8077	SNP
Lib10^4_#2 50_Jm^2 Selection	TAG_BX_CGTTGCTTGTGT	130	C	T	72	37	35	C/T	0.5139	SNP
Lib10^4_#2 50_Jm^2 Selection	TAG_BX_CGTTGGTGCCTT	118	G	A	31	26	5	G/A	0.8387	SNP
Lib10^4_#2 50_Jm^2 Selection	TAG_BX_CGTTGGTTGCGT	5	G	C	32	30	2	G/C	0.9375	SNP
Lib10^4_#2 50_Jm^2 Selection	TAG_BX_CGTTTTGGCCGT	69	T	C	19	2	17	T/C	0.1053	SNP
Lib10^4_#2 50_Jm^2 Selection	TAG_BX_CGTTTTGGCCGT	5	G	A	19	19	0	G/A	1	SNP
Lib10^4_#2 50_Jm^2 Selection	TAG_BX_CGTTTTGGGCTG	130	C	T	23	3	20	C/T	0.1304	SNP
Lib10^4_#2 50_Jm^2 Selection	TAG_BX_CGTTTTGGGCTG	85	G	A	23	18	5	G/A	0.7826	SNP
Lib10^4_#2 50_Jm^2 Selection	TAG_BX_CTAACCAGATGA	121	G	A	52	42	10	G/A	0.8077	SNP
Lib10^4_#2 50_Jm^2 Selection	TAG_BX_CTAATACATCTA	131	C	T	57	45	8	C/T	0.7895	SNP
Lib10^4_#2 50_Jm^2 Selection	TAG_BX_CTACTTCCGAGT	118	G	A	38	33	4	G/A	0.8684	SNP
Lib10^4_#2 50_Jm^2 Selection	TAG_BX_CTAGAAGCCCTC	85	G	T	61	50	10	G/T	0.8197	SNP
Lib10^4_#2 50_Jm^2 Selection	TAG_BX_CTAGAATTCTTT	122	G	A	32	27	5	G/A	0.8438	SNP
Lib10^4_#2 50_Jm^2 Selection	TAG_BX_CTAGGAGAGGAC	71	C	G	50	42	6	C/G	0.84	SNP
Lib10^4_#2 50_Jm^2 Selection	TAG_BX_CTATAGCACAAC	130	C	T	68	50	17	C/T	0.7353	SNP
Lib10^4_#2 50_Jm^2 Selection	TAG_BX_CTATCTGGACTT	5	G	A	17	16	1	G/A	0.9412	SNP
Lib10^4_#2 50_Jm^2 Selection	TAG_BX_CTATCTTATACA	131	C	T	40	34	5	C/T	0.85	SNP
Lib10^4_#2 50_Jm^2 Selection	TAG_BX_CTATGCTCTGTC	131	C	A	25	22	3	C/A	0.88	SNP
Lib10^4_#2 50_Jm^2 Selection	TAG_BX_CTATTTTCTACT	121	G	A	150	45	105	G/A	0.3	SNP
Lib10^4_#2 50_Jm^2 Selection	TAG_BX_CTATTTTCTACT	71	C	A	150	74	69	C/A	0.4933	SNP
Lib10^4_#2 50_Jm^2 Selection	TAG_BX_CTCACCATTCGG	121	G	A	80	14	8	G/A	0.175	SNP
Lib10^4_#2 50_Jm^2 Selection	TAG_BX_CTCATGTACCTA	121	G	A	48	40	8	G/A	0.8333	SNP
Lib10^4_#2 50_Jm^2 Selection	TAG_BX_CTCCGGCGTCAC	118	G	A	48	39	7	G/A	0.8125	SNP
Lib10^4_#2 50_Jm^2 Selection	TAG_BX_CTCCTTTTATCT	85	G	A	81	71	10	G/A	0.8765	SNP
Lib10^4_#2 50_Jm^2 Selection	TAG_BX_CTCGCGTTCTTT	131	C	T	86	71	15	C/T	0.8256	SNP
Lib10^4_#2 50_Jm^2 Selection	TAG_BX_CTCGTTCAGTGT	121	G	A	59	46	13	G/A	0.7797	SNP
Lib10^4_#2 50_Jm^2 Selection	TAG_BX_CTCTAGAGAACA	118	G	A	46	38	8	G/A	0.8261	SNP
Lib10^4_#2 50_Jm^2 Selection	TAG_BX_CTCTGCTATCAG	89	C	G	82	68	13	C/G	0.8293	SNP
Lib10^4_#2 50_Jm^2 Selection	TAG_BX_CTCTTCAACTAC	134	C	G	80	67	12	C/G	0.8375	SNP
Lib10^4_#2 50_Jm^2 Selection	TAG_BX_CTCTTGATCTAA	130	C	T	115	89	25	C/T	0.7739	SNP
Lib10^4_#2 50_Jm^2 Selection	TAG_BX_CTGAATAGGTCT	130	C	T	74	60	12	C/T	0.8108	SNP
Lib10^4_#2 50_Jm^2 Selection	TAG_BX_CTGAGGGTGTGT	71	C	G	111	94	12	C/G	0.8468	SNP
Lib10^4_#2 50_Jm^2 Selection	TAG_BX_CTGAGTTGCTAA	118	G	A	19	12	7	G/A	0.6316	SNP
Lib10^4_#2 50_Jm^2 Selection	TAG_BX_CTGAGTTGCTAA	5	G	A	19	5	14	G/A	0.2632	SNP
Lib10^4_#2 50_Jm^2 Selection	TAG_BX_CTGATATTGCTG	121	G	T	47	36	11	G/T	0.766	SNP
Lib10^4_#2 50_Jm^2 Selection	TAG_BX_CTGATTTTTTGG	118	G	A	95	75	20	G/A	0.7895	SNP
Lib10^4_#2 50_Jm^2 Selection	TAG_BX_CTGCATTTTGGT	118	G	A	26	19	5	G/A	0.7308	SNP
Lib10^4_#2 50_Jm^2 Selection	TAG_BX_CTGCATTTTGGT	131	C	T	26	3	23	C/T	0.1154	SNP
Lib10^4_#2 50_Jm^2 Selection	TAG_BX_CTGCCTAACCAT	91	G	C	31	27	4	G/C	0.871	SNP
Lib10^4_#2 50_Jm^2 Selection	TAG_BX_CTGCGGTCGATC	85	G	A	43	35	8	G/A	0.814	SNP
Lib10^4_#2 50_Jm^2 Selection	TAG_BX_CTGCTTAGTTAG	118	G	A	16	16	0	G/A	1	SNP
Lib10^4_#2 50_Jm^2 Selection	TAG_BX_CTGCTTGGTTGG	130	C	T	35	32	2	C/T	0.9143	SNP
Lib10^4_#2 50_Jm^2 Selection	TAG_BX_CTGGCGGTCTTC	118	G	A	51	44	7	G/A	0.8627	SNP
Lib10^4_#2 50_Jm^2 Selection	TAG_BX_CTGGGTGTTTTC	130	C	T	11	9	2	C/T	0.8182	SNP
Lib10^4_#2 50_Jm^2 Selection	TAG_BX_CTGGTCGTTGCT	5	G	A	32	17	5	G/A	0.5312	SNP
Lib10^4_#2 50_Jm^2 Selection	TAG_BX_CTGGTCGTTGCT	5	G	C	32	10	5	G/C	0.3125	SNP
Lib10^4_#2 50_Jm^2 Selection	TAG_BX_CTGGTTGGCCAT	131	C	T	61	50	10	C/T	0.8197	SNP
Lib10^4_#2 50_Jm^2 Selection	TAG_BX_CTGTAGCTTTGT	134	C	G	38	33	5	C/G	0.8684	SNP
Lib10^4_#2 50_Jm^2 Selection	TAG_BX_CTGTAGGCGGGT	131	C	T	67	57	10	C/T	0.8507	SNP
Lib10^4_#2 50_Jm^2 Selection	TAG_BX_CTGTGATGTGTG	118	G	A	36	32	4	G/A	0.8889	SNP
Lib10^4_#2 50_Jm^2 Selection	TAG_BX_CTGTGGGTTGGT	130	C	T	49	40	8	C/T	0.8163	SNP
Lib10^4_#2 50_Jm^2 Selection	TAG_BX_CTGTGTGGTCGG	118	G	A	52	44	8	G/A	0.8462	SNP
Lib10^4_#2 50_Jm^2 Selection	TAG_BX_CTGTTTGTGTGT	95	C	G	34	28	6	C/G	0.8235	SNP
Lib10^4_#2 50_Jm^2 Selection	TAG_BX_CTGTTTTAGGTC	71	C	A	21	17	4	C/A	0.8095	SNP
Lib10^4_#2 50_Jm^2 Selection	TAG_BX_CTTACATTTCTG	85	G	A	58	50	8	G/A	0.8621	SNP
Lib10^4_#2 50_Jm^2 Selection	TAG_BX_CTTACCACGTGC	118	G	A	40	30	10	G/A	0.75	SNP
Lib10^4_#2 50_Jm^2 Selection	TAG_BX_CTTAGGGCCAAC	121	G	A	54	48	6	G/A	0.8889	SNP
Lib10^4_#2 50_Jm^2 Selection	TAG_BX_CTTCCATTGGCG	130	C	G	49	42	6	C/G	0.8571	SNP
Lib10^4_#2 50_Jm^2 Selection	TAG_BX_CTTCCTCGGCGG	85	G	T	84	70	13	G/T	0.8333	SNP
Lib10^4_#2 50_Jm^2 Selection	TAG_BX_CTTCTGTCTTGT	118	G	A	40	35	5	G/A	0.875	SNP
Lib10^4_#2 50_Jm^2 Selection	TAG_BX_CTTGCCAATCCC	85	G	A	79	72	7	G/A	0.9114	SNP
Lib10^4_#2 50_Jm^2 Selection	TAG_BX_CTTGCCTGATCC	118	G	A	43	39	4	G/A	0.907	SNP
Lib10^4_#2 50_Jm^2 Selection	TAG_BX_CTTGCGGGCTCT	85	G	A	31	27	4	G/A	0.871	SNP
Lib10^4_#2 50_Jm^2 Selection	TAG_BX_CTTGCGGTTCCT	97	A	G	17	16	1	A/G	0.9412	SNP
Lib10^4_#2 50_Jm^2 Selection	TAG_BX_CTTGGCAGTACG	131	C	T	41	27	14	C/T	0.6585	SNP
Lib10^4_#2 50_Jm^2 Selection	TAG_BX_CTTGTTACCATT	118	G	A	34	30	4	G/A	0.8824	SNP
Lib10^4_#2 50_Jm^2 Selection	TAG_BX_CTTTCTCCTTTC	121	G	A	31	29	2	G/A	0.9355	SNP
Lib10^4_#2 50_Jm^2 Selection	TAG_BX_CTTTCTCTCTTC	121	G	A	35	31	4	G/A	0.8857	SNP
Lib10^4_#2 50_Jm^2 Selection	TAG_BX_CTTTGGAGATAG	131	C	T	44	40	4	C/T	0.9091	SNP
Lib10^4_#2 50_Jm^2 Selection	TAG_BX_CTTTTCCTGTTA	122	G	A	57	47	10	G/A	0.8246	SNP
Lib10^4_#2 50_Jm^2 Selection	TAG_BX_CTTTTCCTGTTA	118	G	A	57	6	51	G/A	0.1053	SNP
Lib10^4_#2 50_Jm^2 Selection	TAG_BX_CTTTTTATTCGA	97	A	G	45	42	3	A/G	0.9333	SNP
Lib10^4_#2 50_Jm^2 Selection	TAG_BX_CTTTTTCGTGCT	130	C	T	92	52	40	C/T	0.5652	SNP
Lib10^4_#2 50_Jm^2 Selection	TAG_BX_GAAAGTAGATGA	131	C	T	41	33	8	C/T	0.8049	SNP
Lib10^4_#2 50_Jm^2 Selection	TAG_BX_GAAATTTTCGTA	118	G	A	70	64	6	G/A	0.9143	SNP
Lib10^4_#2 50_Jm^2 Selection	TAG_BX_GAACACACAGCT	118	G	A	98	81	14	G/A	0.8265	SNP
Lib10^4_#2 50_Jm^2 Selection	TAG_BX_GAACTTTTTCTG	118	G	A	26	23	3	G/A	0.8846	SNP
Lib10^4_#2 50_Jm^2 Selection	TAG_BX_GAAGACTGGATC	85	G	A	33	30	3	G/A	0.9091	SNP
Lib10^4_#2 50_Jm^2 Selection	TAG_BX_GAATAGGGGTTA	118	G	A	29	26	3	G/A	0.8966	SNP
Lib10^4_#2 50_Jm^2 Selection	TAG_BX_GAATGCTTGTCT	70	C	T	30	26	3	C/T	0.8667	SNP
Lib10^4_#2 50_Jm^2 Selection	TAG_BX_GACCTTATGCTT	5	G	C	25	24	1	G/C	0.96	SNP
Lib10^4_#2 50_Jm^2 Selection	TAG_BX_GACCTTATGCTT	69	T	C	25	5	20	T/C	0.2	SNP
Lib10^4_#2 50_Jm^2 Selection	TAG_BX_GACCTTATGCTT	118	G	A	25	3	21	G/A	0.12	SNP
Lib10^4_#2 50_Jm^2 Selection	TAG_BX_GACGACCAGTTG	118	G	A	107	91	16	G/A	0.8505	SNP
Lib10^4_#2 50_Jm^2 Selection	TAG_BX_GACTGATATCAT	5	G	A	14	14	0	G/A	1	SNP
Lib10^4_#2 50_Jm^2 Selection	TAG_BX_GACTGATATCAT	118	G	A	14	3	11	G/A	0.2143	SNP
Lib10^4_#2 50_Jm^2 Selection	TAG_BX_GAGACTTGATGA	95	C	G	48	35	11	C/G	0.7292	SNP
Lib10^4_#2 50_Jm^2 Selection	TAG_BX_GAGATGATGGCG	95	C	G	33	29	4	C/G	0.8788	SNP
Lib10^4_#2 50_Jm^2 Selection	TAG_BX_GAGATGTGGTGT	5	G	A	32	30	1	G/A	0.9375	SNP
Lib10^4_#2 50_Jm^2 Selection	TAG_BX_GAGATTCTCCAG	134	C	G	33	26	7	C/G	0.7879	SNP
Lib10^4_#2 50_Jm^2 Selection	TAG_BX_GAGATTCTCCAG	69	T	C	33	5	28	T/C	0.1515	SNP
Lib10^4_#2 50_Jm^2 Selection	TAG_BX_GAGGCATCGTGA	118	G	A	45	40	4	G/A	0.8889	SNP
Lib10^4_#2 50_Jm^2 Selection	TAG_BX_GAGGGATCAGTC	5	G	A	21	19	2	G/A	0.9048	SNP
Lib10^4_#2 50_Jm^2 Selection	TAG_BX_GAGGGTGAATTA	131	C	T	40	35	5	C/T	0.875	SNP
Lib10^4_#2 50_Jm^2 Selection	TAG_BX_GAGGGTGCTTAA	65	G	A	73	8	7	G/A	0.1096	SNP
Lib10^4_#2 50_Jm^2 Selection	TAG_BX_GAGGGTTTCAGT	118	G	A	36	29	7	G/A	0.8056	SNP
Lib10^4_#2 50_Jm^2 Selection	TAG_BX_GAGTAGCTGTTG	5	G	C	13	12	1	G/C	0.9231	SNP
Lib10^4_#2 50_Jm^2 Selection	TAG_BX_GAGTGCACATAG	118	G	A	28	24	4	G/A	0.8571	SNP
Lib10^4_#2 50_Jm^2 Selection	TAG_BX_GAGTGTTTGTGT	130	C	T	43	34	9	C/T	0.7907	SNP
Lib10^4_#2 50_Jm^2 Selection	TAG_BX_GAGTTCGAGCCT	130	C	A	42	33	7	C/A	0.7857	SNP
Lib10^4_#2 50_Jm^2 Selection	TAG_BX_GAGTTCGAGTTT	130	C	G	47	39	4	C/G	0.8298	SNP
Lib10^4_#2 50_Jm^2 Selection	TAG_BX_GATACTCCTTAC	130	C	G	51	40	10	C/G	0.7843	SNP
Lib10^4_#2 50_Jm^2 Selection	TAG_BX_GATCGGGCTTGG	130	C	T	44	33	11	C/T	0.75	SNP
Lib10^4_#2 50_Jm^2 Selection	TAG_BX_GATCTTCGCTGC	118	G	A	53	49	4	G/A	0.9245	SNP
Lib10^4_#2 50_Jm^2 Selection	TAG_BX_GATCTTGTCTCT	118	G	A	38	32	5	G/A	0.8421	SNP
Lib10^4_#2 50_Jm^2 Selection	TAG_BX_GATGCGGTGCGT	118	G	A	27	3	24	G/A	0.1111	SNP
Lib10^4_#2 50_Jm^2 Selection	TAG_BX_GATGCGGTGCGT	5	G	A	27	25	2	G/A	0.9259	SNP
Lib10^4_#2 50_Jm^2 Selection	TAG_BX_GATGTCAAGCCT	122	G	A	63	51	12	G/A	0.8095	SNP
Lib10^4_#2 50_Jm^2 Selection	TAG_BX_GATTGCACATCA	131	C	T	33	27	6	C/T	0.8182	SNP
Lib10^4_#2 50_Jm^2 Selection	TAG_BX_GATTTGCGGTCT	130	C	T	124	57	15	C/T	0.4597	SNP
Lib10^4_#2 50_Jm^2 Selection	TAG_BX_GATTTTTTATTG	95	C	G	46	39	7	C/G	0.8478	SNP
Lib10^4_#2 50_Jm^2 Selection	TAG_BX_GCACACGCAGTT	85	G	A	60	54	6	G/A	0.9	SNP
Lib10^4_#2 50_Jm^2 Selection	TAG_BX_GCACTGTTTCAC	85	G	C	51	42	8	G/C	0.8235	SNP
Lib10^4_#2 50_Jm^2 Selection	TAG_BX_GCATGTCAGGCT	130	C	T	61	54	6	C/T	0.8852	SNP
Lib10^4_#2 50_Jm^2 Selection	TAG_BX_GCCAGTCGATAT	130	C	A	45	34	7	C/A	0.7556	SNP
Lib10^4_#2 50_Jm^2 Selection	TAG_BX_GCCCATTGCTCG	5	G	A	29	28	1	G/A	0.9655	SNP
Lib10^4_#2 50_Jm^2 Selection	TAG_BX_GCCGGCTTGACC	130	C	T	59	40	16	C/T	0.678	SNP
Lib10^4_#2 50_Jm^2 Selection	TAG_BX_GCCTAGGTCGCG	-62	C	T	70	69	1	C/T	0.9857	SNP
Lib10^4_#2 50_Jm^2 Selection	TAG_BX_GCCTAGGTCGCG	130	C	T	70	52	17	C/T	0.7429	SNP
Lib10^4_#2 50_Jm^2 Selection	TAG_BX_GCCTATCAGCCG	131	C	A	24	18	5	C/A	0.75	SNP
Lib10^4_#2 50_Jm^2 Selection	TAG_BX_GCCTATGGTCTC	121	G	A	19	16	3	G/A	0.8421	SNP
Lib10^4_#2 50_Jm^2 Selection	TAG_BX_GCCTCGTTCCGG	121	G	A	55	9	8	G/A	0.1636	SNP
Lib10^4_#2 50_Jm^2 Selection	TAG_BX_GCCTGTTGATGG	82	A	G	65	59	6	A/G	0.9077	SNP
Lib10^4_#2 50_Jm^2 Selection	TAG_BX_GCCTGTTGATTA	118	G	A	42	31	10	G/A	0.7381	SNP
Lib10^4_#2 50_Jm^2 Selection	TAG_BX_GCGATAGGATTG	85	G	A	24	22	2	G/A	0.9167	SNP
Lib10^4_#2 50_Jm^2 Selection	TAG_BX_GCGATATCCAAC	118	G	A	43	35	8	G/A	0.814	SNP
Lib10^4_#2 50_Jm^2 Selection	TAG_BX_GCGCAGATTGGT	118	G	A	34	29	4	G/A	0.8529	SNP
Lib10^4_#2 50_Jm^2 Selection	TAG_BX_GCGCGTAGTGCC	130	C	T	61	53	8	C/T	0.8689	SNP
Lib10^4_#2 50_Jm^2 Selection	TAG_BX_GCGCGTCTTTCT	131	C	T	43	38	4	C/T	0.8837	SNP
Lib10^4_#2 50_Jm^2 Selection	TAG_BX_GCGGAATACCCT	69	T	C	48	5	41	T/C	0.1042	SNP
Lib10^4_#2 50_Jm^2 Selection	TAG_BX_GCGGAATACCCT	85	G	A	48	45	3	G/A	0.9375	SNP
Lib10^4_#2 50_Jm^2 Selection	TAG_BX_GCGGCCACAAAG	130	C	T	48	7	6	C/T	0.1458	SNP
Lib10^4_#2 50_Jm^2 Selection	TAG_BX_GCGGCGGATGGG	118	G	A	112	95	16	G/A	0.8482	SNP
Lib10^4_#2 50_Jm^2 Selection	TAG_BX_GCGTCATGCGAT	131	C	T	56	45	9	C/T	0.8036	SNP
Lib10^4_#2 50_Jm^2 Selection	TAG_BX_GCGTCTGTTCCG	130	C	T	23	18	5	C/T	0.7826	SNP
Lib10^4_#2 50_Jm^2 Selection	TAG_BX_GCGTGGACACAG	118	G	A	50	41	9	G/A	0.82	SNP
Lib10^4_#2 50_Jm^2 Selection	TAG_BX_GCGTGGTCTTGT	118	G	A	31	26	5	G/A	0.8387	SNP
Lib10^4_#2 50_Jm^2 Selection	TAG_BX_GCGTTTCCTTAT	118	G	A	33	28	4	G/A	0.8485	SNP
Lib10^4_#2 50_Jm^2 Selection	TAG_BX_GCTATAGCGCTC	5	G	A	18	18	0	G/A	1	SNP
Lib10^4_#2 50_Jm^2 Selection	TAG_BX_GCTCGCACGAAA	131	C	T	46	37	8	C/T	0.8043	SNP
Lib10^4_#2 50_Jm^2 Selection	TAG_BX_GCTCTGGCCTAA	131	C	T	29	26	2	C/T	0.8966	SNP
Lib10^4_#2 50_Jm^2 Selection	TAG_BX_GCTCTGGCGGGA	74	A	G	38	30	8	A/G	0.7895	SNP
Lib10^4_#2 50_Jm^2 Selection	TAG_BX_GCTCTGTTGAAA	85	G	A	25	22	3	G/A	0.88	SNP
Lib10^4_#2 50_Jm^2 Selection	TAG_BX_GCTCTTGGCCGT	131	C	T	39	33	5	C/T	0.8462	SNP
Lib10^4_#2 50_Jm^2 Selection	TAG_BX_GCTCTTGGCCGT	118	G	A	39	4	35	G/A	0.1026	SNP
Lib10^4_#2 50_Jm^2 Selection	TAG_BX_GCTCTTTCTTTT	5	G	C	20	17	2	G/C	0.85	SNP
Lib10^4_#2 50_Jm^2 Selection	TAG_BX_GCTGTTCTTTGT	131	C	T	83	66	16	C/T	0.7952	SNP
Lib10^4_#2 50_Jm^2 Selection	TAG_BX_GCTTAGGGAGCT	121	G	A	77	66	11	G/A	0.8571	SNP
Lib10^4_#2 50_Jm^2 Selection	TAG_BX_GCTTCTACCTTA	130	C	T	54	43	10	C/T	0.7963	SNP
Lib10^4_#2 50_Jm^2 Selection	TAG_BX_GCTTCTATCATT	5	G	A	20	20	0	G/A	1	SNP
Lib10^4_#2 50_Jm^2 Selection	TAG_BX_GCTTTGTTTACA	-12	C	G	17	16	1	C/G	0.9412	SNP
Lib10^4_#2 50_Jm^2 Selection	TAG_BX_GCTTTTGTTCTA	71	C	G	56	49	7	C/G	0.875	SNP
Lib10^4_#2 50_Jm^2 Selection	TAG_BX_GGAAGCCGTGTC	95	C	G	26	23	2	C/G	0.8846	SNP
Lib10^4_#2 50_Jm^2 Selection	TAG_BX_GGACGAATCCTA	106	G	A	61	13	8	G/A	0.2131	SNP
Lib10^4_#2 50_Jm^2 Selection	TAG_BX_GGAGAAAGCCCG	71	C	A	13	9	3	C/A	0.6923	SNP
Lib10^4_#2 50_Jm^2 Selection	TAG_BX_GGAGGTGACCTT	121	G	T	44	34	7	G/T	0.7727	SNP
Lib10^4_#2 50_Jm^2 Selection	TAG_BX_GGAGGTGGTTTA	131	C	T	65	54	10	C/T	0.8308	SNP
Lib10^4_#2 50_Jm^2 Selection	TAG_BX_GGAGTACGTTGG	85	G	A	62	53	9	G/A	0.8548	SNP
Lib10^4_#2 50_Jm^2 Selection	TAG_BX_GGAGTTCCTTTG	123	T	C	33	25	8	T/C	0.7576	SNP
Lib10^4_#2 50_Jm^2 Selection	TAG_BX_GGAGTTGTGATA	131	C	T	12	11	1	C/T	0.9167	SNP
Lib10^4_#2 50_Jm^2 Selection	TAG_BX_GGATACTTCTCT	118	G	A	33	25	7	G/A	0.7576	SNP
Lib10^4_#2 50_Jm^2 Selection	TAG_BX_GGATCACCTAAC	130	C	T	57	40	17	C/T	0.7018	SNP
Lib10^4_#2 50_Jm^2 Selection	TAG_BX_GGATCGAATTGT	95	C	G	91	81	10	C/G	0.8901	SNP
Lib10^4_#2 50_Jm^2 Selection	TAG_BX_GGATCGCTGGGT	95	C	G	68	51	16	C/G	0.75	SNP
Lib10^4_#2 50_Jm^2 Selection	TAG_BX_GGATCTGTTTGA	118	G	A	27	3	24	G/A	0.1111	SNP
Lib10^4_#2 50_Jm^2 Selection	TAG_BX_GGATCTTTTCGA	121	G	A	25	23	2	G/A	0.92	SNP
Lib10^4_#2 50_Jm^2 Selection	TAG_BX_GGATTACTCCTT	131	C	T	21	17	4	C/T	0.8095	SNP
Lib10^4_#2 50_Jm^2 Selection	TAG_BX_GGATTCTGTATA	131	C	T	33	27	6	C/T	0.8182	SNP
Lib10^4_#2 50_Jm^2 Selection	TAG_BX_GGCAACTAGATG	55	A	C	23	3	20	A/C	0.1304	SNP
Lib10^4_#2 50_Jm^2 Selection	TAG_BX_GGCAACTAGATG	5	G	A	23	23	0	G/A	1	SNP
Lib10^4_#2 50_Jm^2 Selection	TAG_BX_GGCATACCTTTT	130	C	G	61	51	10	C/G	0.8361	SNP
Lib10^4_#2 50_Jm^2 Selection	TAG_BX_GGCATCCATTTC	5	G	A	17	16	1	G/A	0.9412	SNP
Lib10^4_#2 50_Jm^2 Selection	TAG_BX_GGCCTTTTTGAT	118	G	A	65	51	13	G/A	0.7846	SNP
Lib10^4_#2 50_Jm^2 Selection	TAG_BX_GGCGACTATCCA	65	G	C	18	14	3	G/C	0.7778	SNP
Lib10^4_#2 50_Jm^2 Selection	TAG_BX_GGCGCTTCCGCA	85	G	A	47	40	6	G/A	0.8511	SNP
Lib10^4_#2 50_Jm^2 Selection	TAG_BX_GGCGGACTTTGA	131	C	T	53	42	10	C/T	0.7925	SNP
Lib10^4_#2 50_Jm^2 Selection	TAG_BX_GGCGTTTGCACT	130	C	T	16	2	14	C/T	0.125	SNP
Lib10^4_#2 50_Jm^2 Selection	TAG_BX_GGCGTTTGCACT	86	G	C	16	15	1	G/C	0.9375	SNP
Lib10^4_#2 50_Jm^2 Selection	TAG_BX_GGCGTTTGTCTA	122	G	A	64	54	10	G/A	0.8438	SNP
Lib10^4_#2 50_Jm^2 Selection	TAG_BX_GGCTACATAAAT	122	G	A	50	43	7	G/A	0.86	SNP
Lib10^4_#2 50_Jm^2 Selection	TAG_BX_GGCTCACGTGTT	61	G	A	57	7	7	G/A	0.1228	SNP
Lib10^4_#2 50_Jm^2 Selection	TAG_BX_GGCTCATATTTA	130	C	T	33	27	5	C/T	0.8182	SNP
Lib10^4_#2 50_Jm^2 Selection	TAG_BX_GGCTGTACGTGC	118	G	A	81	71	8	G/A	0.8765	SNP
Lib10^4_#2 50_Jm^2 Selection	TAG_BX_GGCTTAGACTGT	131	C	G	46	40	4	C/G	0.8696	SNP
Lib10^4_#2 50_Jm^2 Selection	TAG_BX_GGCTTCCCGCGT	121	G	C	29	21	5	G/C	0.7241	SNP
Lib10^4_#2 50_Jm^2 Selection	TAG_BX_GGCTTCCCGCGT	121	G	A	29	3	5	G/A	0.1034	SNP
Lib10^4_#2 50_Jm^2 Selection	TAG_BX_GGCTTCGTTGAG	5	G	A	20	18	2	G/A	0.9	SNP
Lib10^4_#2 50_Jm^2 Selection	TAG_BX_GGGACATTTGCA	130	C	T	49	37	10	C/T	0.7551	SNP
Lib10^4_#2 50_Jm^2 Selection	TAG_BX_GGGATTCAAAAT	118	G	A	25	17	8	G/A	0.68	SNP
Lib10^4_#2 50_Jm^2 Selection	TAG_BX_GGGATTTATTGG	121	G	A	18	17	1	G/A	0.9444	SNP
Lib10^4_#2 50_Jm^2 Selection	TAG_BX_GGGCAATTATTG	118	G	A	55	54	1	G/A	0.9818	SNP
Lib10^4_#2 50_Jm^2 Selection	TAG_BX_GGGCTCCTCACT	130	C	G	62	50	10	C/G	0.8065	SNP
Lib10^4_#2 50_Jm^2 Selection	TAG_BX_GGGGAACGTTCA	121	G	A	29	3	26	G/A	0.1034	SNP
Lib10^4_#2 50_Jm^2 Selection	TAG_BX_GGGGAACGTTCA	118	G	A	29	23	6	G/A	0.7931	SNP
Lib10^4_#2 50_Jm^2 Selection	TAG_BX_GGGGACGTAGCA	95	C	G	37	31	5	C/G	0.8378	SNP
Lib10^4_#2 50_Jm^2 Selection	TAG_BX_GGGGAGCGTGTG	121	G	A	79	12	7	G/A	0.1519	SNP
Lib10^4_#2 50_Jm^2 Selection	TAG_BX_GGGGAGTCCGGG	118	G	A	58	16	42	G/A	0.2759	SNP
Lib10^4_#2 50_Jm^2 Selection	TAG_BX_GGGGAGTCCGGG	131	C	T	58	35	21	C/T	0.6034	SNP
Lib10^4_#2 50_Jm^2 Selection	TAG_BX_GGGGATTCAGTG	95	C	G	52	42	10	C/G	0.8077	SNP
Lib10^4_#2 50_Jm^2 Selection	TAG_BX_GGGGATTCTCTG	121	G	T	39	31	8	G/T	0.7949	SNP
Lib10^4_#2 50_Jm^2 Selection	TAG_BX_GGGGATTCTCTG	118	G	A	39	4	35	G/A	0.1026	SNP
Lib10^4_#2 50_Jm^2 Selection	TAG_BX_GGGGGCTTCGCA	131	C	T	53	44	8	C/T	0.8302	SNP
Lib10^4_#2 50_Jm^2 Selection	TAG_BX_GGGGGTGCTTGT	118	G	A	72	57	14	G/A	0.7917	SNP
Lib10^4_#2 50_Jm^2 Selection	TAG_BX_GGGGTGCTAGGT	5	G	A	32	32	0	G/A	1	SNP
Lib10^4_#2 50_Jm^2 Selection	TAG_BX_GGGTAGGCCTCG	5	G	A	22	21	1	G/A	0.9545	SNP
Lib10^4_#2 50_Jm^2 Selection	TAG_BX_GGGTGTGATTTA	118	G	A	12	8	3	G/A	0.6667	SNP
Lib10^4_#2 50_Jm^2 Selection	TAG_BX_GGGTTATATTTC	85	G	T	65	54	11	G/T	0.8308	SNP
Lib10^4_#2 50_Jm^2 Selection	TAG_BX_GGTACACTTGTT	121	G	A	108	49	58	G/A	0.4537	SNP
Lib10^4_#2 50_Jm^2 Selection	TAG_BX_GGTACGAGTTTT	-63	G	T	50	49	1	G/T	0.98	SNP
Lib10^4_#2 50_Jm^2 Selection	TAG_BX_GGTACGAGTTTT	130	C	A	50	39	10	C/A	0.78	SNP
Lib10^4_#2 50_Jm^2 Selection	TAG_BX_GGTAGTTTTGAG	130	C	T	23	20	3	C/T	0.8696	SNP
Lib10^4_#2 50_Jm^2 Selection	TAG_BX_GGTATGTAATGG	130	C	T	55	8	9	C/T	0.1455	SNP
Lib10^4_#2 50_Jm^2 Selection	TAG_BX_GGTCAGTTATGT	118	G	A	38	30	8	G/A	0.7895	SNP
Lib10^4_#2 50_Jm^2 Selection	TAG_BX_GGTCCAGTGCAA	130	C	T	41	34	6	C/T	0.8293	SNP
Lib10^4_#2 50_Jm^2 Selection	TAG_BX_GGTCGTGTAGCG	131	C	T	66	55	10	C/T	0.8333	SNP
Lib10^4_#2 50_Jm^2 Selection	TAG_BX_GGTCTCAAACAA	130	C	T	53	45	7	C/T	0.8491	SNP
Lib10^4_#2 50_Jm^2 Selection	TAG_BX_GGTGAAGTAGGC	118	G	A	50	42	8	G/A	0.84	SNP
Lib10^4_#2 50_Jm^2 Selection	TAG_BX_GGTGACGGTTCC	77	G	A	38	5	3	G/A	0.1316	SNP
Lib10^4_#2 50_Jm^2 Selection	TAG_BX_GGTGATTTTAAA	131	C	T	51	47	3	C/T	0.9216	SNP
Lib10^4_#2 50_Jm^2 Selection	TAG_BX_GGTGCCCGGGAT	118	G	A	18	2	16	G/A	0.1111	SNP
Lib10^4_#2 50_Jm^2 Selection	TAG_BX_GGTGCCCGGGAT	131	C	T	18	16	2	C/T	0.8889	SNP
Lib10^4_#2 50_Jm^2 Selection	TAG_BX_GGTGCGGTATCA	134	C	G	31	24	7	C/G	0.7742	SNP
Lib10^4_#2 50_Jm^2 Selection	TAG_BX_GGTGTGGCGCGA	5	G	A	19	18	1	G/A	0.9474	SNP
Lib10^4_#2 50_Jm^2 Selection	TAG_BX_GGTTATGTGTAT	130	C	T	19	16	3	C/T	0.8421	SNP
Lib10^4_#2 50_Jm^2 Selection	TAG_BX_GGTTGATTTGCG	130	C	T	49	41	8	C/T	0.8367	SNP
Lib10^4_#2 50_Jm^2 Selection	TAG_BX_GGTTGCGGTTAA	130	C	T	137	19	20	C/T	0.1387	SNP
Lib10^4_#2 50_Jm^2 Selection	TAG_BX_GGTTGCGTTCTC	118	G	A	30	29	1	G/A	0.9667	SNP
Lib10^4_#2 50_Jm^2 Selection	TAG_BX_GGTTTCTTGCGT	121	G	A	86	74	12	G/A	0.8605	SNP
Lib10^4_#2 50_Jm^2 Selection	TAG_BX_GTAACTTGTATA	121	G	T	64	46	17	G/T	0.7188	SNP
Lib10^4_#2 50_Jm^2 Selection	TAG_BX_GTAATCCCGTTG	85	G	T	44	38	6	G/T	0.8636	SNP
Lib10^4_#2 50_Jm^2 Selection	TAG_BX_GTACAAACTTCG	121	G	A	42	35	7	G/A	0.8333	SNP
Lib10^4_#2 50_Jm^2 Selection	TAG_BX_GTACAAACTTCG	69	T	C	42	7	35	T/C	0.1667	SNP
Lib10^4_#2 50_Jm^2 Selection	TAG_BX_GTACCATCCTCA	55	A	C	15	3	12	A/C	0.2	SNP
Lib10^4_#2 50_Jm^2 Selection	TAG_BX_GTACCGCGTGCT	122	G	A	68	51	15	G/A	0.75	SNP
Lib10^4_#2 50_Jm^2 Selection	TAG_BX_GTACTGTGGAAG	122	G	A	37	30	7	G/A	0.8108	SNP
Lib10^4_#2 50_Jm^2 Selection	TAG_BX_GTAGCGCGATCC	5	G	A	18	16	2	G/A	0.8889	SNP
Lib10^4_#2 50_Jm^2 Selection	TAG_BX_GTAGTTCATCCT	118	G	A	127	104	22	G/A	0.8189	SNP
Lib10^4_#2 50_Jm^2 Selection	TAG_BX_GTCAATGTTTTA	130	C	T	110	91	18	C/T	0.8273	SNP
Lib10^4_#2 50_Jm^2 Selection	TAG_BX_GTCAGGCCGGTG	5	G	A	14	14	0	G/A	1	SNP
Lib10^4_#2 50_Jm^2 Selection	TAG_BX_GTCAGTACGTGA	130	C	T	46	6	2	C/T	0.1304	SNP
Lib10^4_#2 50_Jm^2 Selection	TAG_BX_GTCATGCGGGTG	5	G	C	23	22	1	G/C	0.9565	SNP
Lib10^4_#2 50_Jm^2 Selection	TAG_BX_GTCATTAGACTT	118	G	A	15	11	4	G/A	0.7333	SNP
Lib10^4_#2 50_Jm^2 Selection	TAG_BX_GTCATTAGACTT	130	C	T	15	2	13	C/T	0.1333	SNP
Lib10^4_#2 50_Jm^2 Selection	TAG_BX_GTCATTCATGTA	118	G	A	65	24	41	G/A	0.3692	SNP
Lib10^4_#2 50_Jm^2 Selection	TAG_BX_GTCATTCATGTA	130	C	T	65	25	40	C/T	0.3846	SNP
Lib10^4_#2 50_Jm^2 Selection	TAG_BX_GTCATTTTGTAC	5	G	A	17	17	0	G/A	1	SNP
Lib10^4_#2 50_Jm^2 Selection	TAG_BX_GTCATTTTGTAC	69	T	C	17	3	14	T/C	0.1765	SNP
Lib10^4_#2 50_Jm^2 Selection	TAG_BX_GTCCCATAGGTG	130	C	T	37	33	3	C/T	0.8919	SNP
Lib10^4_#2 50_Jm^2 Selection	TAG_BX_GTCCGGGAAGCT	131	C	T	74	62	12	C/T	0.8378	SNP
Lib10^4_#2 50_Jm^2 Selection	TAG_BX_GTCCTCGGTGTT	5	G	A	22	20	2	G/A	0.9091	SNP
Lib10^4_#2 50_Jm^2 Selection	TAG_BX_GTCGCTCTAGCG	121	G	A	34	25	8	G/A	0.7353	SNP
Lib10^4_#2 50_Jm^2 Selection	TAG_BX_GTCGCTCTAGCG	118	G	A	34	4	30	G/A	0.1176	SNP
Lib10^4_#2 50_Jm^2 Selection	TAG_BX_GTCGGTGTTTTT	118	G	A	22	17	5	G/A	0.7727	SNP
Lib10^4_#2 50_Jm^2 Selection	TAG_BX_GTCGTGATAGGC	130	C	A	48	42	5	C/A	0.875	SNP
Lib10^4_#2 50_Jm^2 Selection	TAG_BX_GTCGTTCTTCGG	5	G	A	30	29	1	G/A	0.9667	SNP
Lib10^4_#2 50_Jm^2 Selection	TAG_BX_GTCGTTTAGGCT	121	G	A	68	57	10	G/A	0.8382	SNP
Lib10^4_#2 50_Jm^2 Selection	TAG_BX_GTCTACTATGCT	-12	C	G	12	11	1	C/G	0.9167	SNP
Lib10^4_#2 50_Jm^2 Selection	TAG_BX_GTCTATAAGGTA	-12	C	G	25	24	1	C/G	0.96	SNP
Lib10^4_#2 50_Jm^2 Selection	TAG_BX_GTCTCAGCGTAC	130	C	T	59	51	6	C/T	0.8644	SNP
Lib10^4_#2 50_Jm^2 Selection	TAG_BX_GTCTTGGTGTTA	118	G	A	38	33	5	G/A	0.8684	SNP
Lib10^4_#2 50_Jm^2 Selection	TAG_BX_GTCTTTGTGGAC	85	G	A	47	42	5	G/A	0.8936	SNP
Lib10^4_#2 50_Jm^2 Selection	TAG_BX_GTGAACTCACCG	71	C	G	96	76	16	C/G	0.7917	SNP
Lib10^4_#2 50_Jm^2 Selection	TAG_BX_GTGAATGTGTCT	85	G	A	52	43	7	G/A	0.8269	SNP
Lib10^4_#2 50_Jm^2 Selection	TAG_BX_GTGAGCGGGAGG	130	C	T	55	45	9	C/T	0.8182	SNP
Lib10^4_#2 50_Jm^2 Selection	TAG_BX_GTGATGGAGGCG	121	G	A	42	37	5	G/A	0.881	SNP
Lib10^4_#2 50_Jm^2 Selection	TAG_BX_GTGCAATTTTGT	118	G	A	34	29	3	G/A	0.8529	SNP
Lib10^4_#2 50_Jm^2 Selection	TAG_BX_GTGCTTATCTTC	118	G	A	70	65	5	G/A	0.9286	SNP
Lib10^4_#2 50_Jm^2 Selection	TAG_BX_GTGGAATACTCC	-12	C	G	17	16	1	C/G	0.9412	SNP
Lib10^4_#2 50_Jm^2 Selection	TAG_BX_GTGGGTCGCGAC	118	G	A	59	47	11	G/A	0.7966	SNP
Lib10^4_#2 50_Jm^2 Selection	TAG_BX_GTGGTATTTTTT	118	G	A	38	30	7	G/A	0.7895	SNP
Lib10^4_#2 50_Jm^2 Selection	TAG_BX_GTGGTTTGAAAG	69	T	C	18	4	14	T/C	0.2222	SNP
Lib10^4_#2 50_Jm^2 Selection	TAG_BX_GTGGTTTGAAAG	118	G	A	18	16	2	G/A	0.8889	SNP
Lib10^4_#2 50_Jm^2 Selection	TAG_BX_GTGTCTGTCGGC	131	C	T	53	37	14	C/T	0.6981	SNP
Lib10^4_#2 50_Jm^2 Selection	TAG_BX_GTGTGCGCAGGC	71	C	G	54	49	5	C/G	0.9074	SNP
Lib10^4_#2 50_Jm^2 Selection	TAG_BX_GTGTGCGGGTTA	5	G	C	21	20	1	G/C	0.9524	SNP
Lib10^4_#2 50_Jm^2 Selection	TAG_BX_GTGTGCGGGTTA	118	G	A	21	3	18	G/A	0.1429	SNP
Lib10^4_#2 50_Jm^2 Selection	TAG_BX_GTGTGGACTAAG	117	C	T	71	54	17	C/T	0.7606	SNP
Lib10^4_#2 50_Jm^2 Selection	TAG_BX_GTGTGGACTAAG	95	C	T	71	56	13	C/T	0.7887	SNP
Lib10^4_#2 50_Jm^2 Selection	TAG_BX_GTGTGGTTATTC	95	C	G	21	19	2	C/G	0.9048	SNP
Lib10^4_#2 50_Jm^2 Selection	TAG_BX_GTGTGTTTGTCG	130	C	T	36	27	9	C/T	0.75	SNP
Lib10^4_#2 50_Jm^2 Selection	TAG_BX_GTGTGTTTTGAG	118	G	A	20	17	3	G/A	0.85	SNP
Lib10^4_#2 50_Jm^2 Selection	TAG_BX_GTTAGAGTAAAA	130	C	T	29	27	2	C/T	0.931	SNP
Lib10^4_#2 50_Jm^2 Selection	TAG_BX_GTTAGCAGTTTT	69	T	C	42	5	36	T/C	0.119	SNP
Lib10^4_#2 50_Jm^2 Selection	TAG_BX_GTTAGCAGTTTT	131	C	T	42	34	8	C/T	0.8095	SNP
Lib10^4_#2 50_Jm^2 Selection	TAG_BX_GTTAGGACATGT	121	G	A	35	29	6	G/A	0.8286	SNP
Lib10^4_#2 50_Jm^2 Selection	TAG_BX_GTTATCACTATC	118	G	A	95	86	9	G/A	0.9053	SNP
Lib10^4_#2 50_Jm^2 Selection	TAG_BX_GTTATTCAAGCC	118	G	A	28	26	2	G/A	0.9286	SNP
Lib10^4_#2 50_Jm^2 Selection	TAG_BX_GTTCACTTTGTG	85	G	A	110	31	53	G/A	0.2818	SNP
Lib10^4_#2 50_Jm^2 Selection	TAG_BX_GTTCACTTTGTG	121	G	A	110	41	69	G/A	0.3727	SNP
[truncated: 4,499 more rows]

## Sheet: 4B
	Lib104_#1				Lib104_#2
	0 J/m2	50 J/m2	100 J/m2	200 J/m2	0 J/m2	50 J/m2	100 J/m2	200 J/m2
1-Del	1 (6.3%)	5 (0.5%)	2 (0.3%)	7 (1.2%)	5 (23.8%)	12 (1.2%)	7 (0.7%)	1 (0.1%)
Del	1 (6.3%)	5 (0.5%)	1 (0.1%)	1 (0.1%)	-	2 (0.2%)	-	1 (0.1%)
DNS	-	116 (12.4%)	123 (16%)	69 (11.5%)	-	123 (12.7%)	133 (13.0%)	164 (15.8%)
Ins	1 (6.3%)	1 (0.1%)	-	-	-	-	-	1 (0.1%)
In-Del	-	-	-	-	-	-	-	-
SNS	13 (81.3%)	810 (86.4%)	642 (83.6%)	522 (87.1%)	16 (76.2%)	835 (85.9%)	883 (86.3%)	872 (83.9%)
Total	16 (100%)	937 (100%)	768 (100%)	599 (100%)	21 (100%)	972 (100%)	1023 (100%)	1039 (100%)

## Sheet: 4C
	Lib104_#1				Lib104_#2
	0 J/m2	50 J/m2	100 J/m2	200 J/m2	0 J/m2	50 J/m2	100 J/m2	200 J/m2
A:T>C:G	3 (23.1%)	6 (0.7%)	2 (0.3%)	1 (0.2%)	11 (68.8%)	2 (0.2%)	2 (0.2%)	-
A:T>G:C	-	9 (1.1%)	6 (0.9%)	6 (1.1%)	-	10 (1.2%)	11 (1.2%)	14 (1.6%)
A:T>T:A	1 (7.7%)	2 (0.2%)	2 (0.3%)	2 (0.4%)	1 (6.3%)	1 (0.1%)	3 (0.3%)	5 (0.6%)
G:C>A:T	1 (7.7%)	720 (88.9%)	590 (91.9%)	433 (83.0%)	1 (6.3%)	623 (74.6%)	699 (79.2%)	801 (91.9%)
G:C>C:G	5 (38.5%)	68 (8.4%)	37 (5.8%)	64 (12.3%)	2 (12.5%)	153 (18.3%)	127 (14.4%)	45 (5.2%)
G:C>T:A	3 (23.1%)	5 (0.6%)	5 (0.8%)	16 (3.1%)	1 (6.3%)	46 (5.5%)	41 (4.6%)	7 (0.8%)
Total	13 (100%)	810 (100%)	642 (100%)	522 (100%)	16 (100%)	835 (100%)	883 (100%)	872 (100%)

## Sheet: 4D
	Lib104_#1							Lib104_#2
	50 J/m2			100 J/m2		200 J/m2		50 J/m2				100 J/m2			200 J/m2
	>AA	>CT	>TT	>AA	>TT	>AA	>TT	>AA	>AC	>GT	>TT	>AA	>GT	>TT	>AA	>AG	>TT
AA>	-	1 (0.9%)	-	-	-	-	-	-	-	1 (0.8%)	-	-	1 (0.8%)	-	-	-	-
AC>	-	-	-	-	-	-	-	-	-	-	-	-	-	-	-	-	1 (0.6%)
CA>	-	-	-	-	-	-	-	-	1 (0.8%)	-	-	-	-	-	-	1 (0.6%)	-
CC>	-	-	23 (19.8%)	-	22 (17.9%)	-	13 (18.8%)	-	-	-	33 (26.8%)	-	-	34 (25.6%)	-	-	48 (29.3%)
CG>	-	-	-	-	-	-	-	-	-	-	1 (0.8%)	-	-	-	-	-	-
GG>	92 (80.1%)	-	-	101 (82.1%)	-	55 (79.7%)	-	86 (69.6%)	-	-	-	98 (73.7%)	-	-	113 (68.9%)	-	-
GT>	-	-	-	-	-	1 (1.4%)	-	1 (0.8%)	-	-	-	-	-	-	1 (0.6%)	-	-
Total	116 (100%)			179 (100%)		69 (100%)		123 (100%)				133 (100%)			164 (100%)

## Sheet: 4E
						Lib104_#1																Lib104_#2
		Reference sequence (positions from -19 to 214)				0 J/m2				50 J/m2				100 J/m2				200 J/m2				0 J/m2				50 J/m2				100 J/m2				200 J/m2
Trinucleotide contexts		>A	>C	>G	>T	>A	>C	>G	>T	>A	>C	>G	>T	>A	>C	>G	>T	>A	>C	>G	>T	>A	>C	>G	>T	>A	>C	>G	>T	>A	>C	>G	>T	>A	>C	>G	>T
AAA	A>	8	-	-	-	-	-	-	-	-	-	-	-	-	-	-	-	-	-	-	-	-	-	-	-	-	-	1	-	-	-	3	-	-	-	3	-
AAC	A>	-	-	-	-	-	-	-	-	-	-	-	-	-	-	-	-	-	-	-	-	-	-	-	-	-	-	-	-	-	-	-	-	-	-	-	-
AAG	A>	6	-	-	-	-	-	-	-	-	-	-	-	-	-	-	-	-	-	-	-	-	-	-	-	-	-	-	-	-	-	-	-	-	-	-	-
AAT	A>	3	-	-	-	-	-	-	-	-	-	-	-	-	-	-	-	-	-	-	-	-	-	-	-	-	-	-	-	-	-	1	-	-	-	-	-
ACA	C>	-	2	-	-	-	-	-	-	-	-	5	-	-	-	1	-	-	-	1	-	-	-	1	-	-	-	11	-	-	-	4	-	-	-	1	-
ACC	C>	-	4	-	-	-	-	-	-	-	-	-	-	-	-	-	-	-	-	-	-	-	-	-	-	-	-	-	-	-	-	-	-	-	-	-	-
ACG	C>	-	-	-	-	-	-	-	-	-	-	-	-	-	-	-	-	-	-	-	-	-	-	-	-	-	-	-	-	-	-	-	-	-	-	-	-
ACT	C>	-	4	-	-	-	-	-	-	-	-	-	-	-	-	-	-	-	-	-	-	-	-	-	-	-	-	-	-	-	-	-	1	-	-	-	-
AGA	G>	-	-	2	-	-	-	-	-	2	1	-	-	1	-	-	-	1	2	-	-	-	-	-	-	2	4	-	-	1	3	-	1	6	-	-	-
AGC	G>	-	-	8	-	-	-	-	-	-	-	-	-	-	-	-	-	-	-	-	1	-	1	-	-	1	-	-	-	-	-	-	-	-	-	-	1
AGG	G>	-	-	4	-	-	-	-	-	89	-	-	1	56	-	-	-	38	-	-	2	-	-	-	-	62	3	-	6	64	-	-	4	107	1	-	1
AGT	G>	-	-	2	-	-	-	-	-	-	-	-	-	-	-	-	-	-	-	-	-	-	-	-	-	-	-	-	-	-	-	-	-	-	-	-	-
ATA	T>	-	-	-	4	-	-	-	-	-	-	-	-	-	1	-	-	-	-	-	-	-	-	-	-	-	1	-	-	-	-	-	-	-	-	-	-
ATC	T>	-	-	-	7	-	-	-	-	-	-	-	-	-	-	-	-	-	-	-	-	-	-	-	-	-	-	-	-	-	-	-	-	-	-	-	-
ATG	T>	-	-	-	3	-	-	3	-	1	1	-	-	2	-	-	-	-	-	-	-	-	-	1	-	-	2	-	-	-	-	-	-	-	-	-	-
ATT	T>	-	-	-	2	-	-	-	-	-	-	-	-	-	-	-	-	-	-	-	-	-	-	-	-	-	-	-	-	-	-	-	-	-	-	-	-
CAA	A>	2	-	-	-	-	-	-	-	-	-	-	-	-	-	-	-	-	-	-	-	-	-	-	-	-	-	-	-	-	-	-	-	-	-	-	-
CAC	A>	5	-	-	-	-	-	-	-	-	-	-	-	-	-	-	-	-	-	-	-	-	-	-	-	-	-	-	-	-	-	-	-	-	-	-	-
CAG	A>	7	-	-	-	-	-	-	-	-	-	-	-	-	-	-	-	-	-	-	-	-	-	-	-	-	-	-	-	-	-	-	-	-	-	-	-
CAT	A>	5	-	-	-	-	-	-	-	-	-	-	-	-	-	-	-	-	-	-	-	-	-	-	-	-	-	-	-	-	-	-	-	-	-	-	-
CCA	C>	-	5	-	-	-	-	-	-	-	-	-	-	-	-	-	-	-	-	-	-	-	-	-	-	-	-	-	-	-	-	-	-	-	-	-	-
CCC	C>	-	7	-	-	-	-	-	-	-	-	1	1	-	-	1	-	4	-	6	-	-	-	-	-	7	-	16	-	5	-	14	1	-	-	2	2
CCG	C>	-	6	-	-	-	-	-	-	-	-	-	-	-	-	-	-	-	-	-	1	-	-	-	-	-	-	-	-	-	-	-	-	-	-	-	-
CCT	C>	-	4	-	-	-	-	-	-	-	-	-	100	1	-	1	108	1	-	3	55	-	-	-	-	5	-	7	105	7	-	6	116	1	-	-	155
CGA	G>	-	-	7	-	-	-	-	-	189	2	-	1	181	-	-	1	131	4	-	3	-	-	-	-	193	4	-	4	225	7	-	4	207	-	-	2
CGC	G>	-	-	4	-	-	-	-	-	-	-	-	-	-	-	-	-	-	-	-	-	-	-	-	-	-	-	-	-	-	-	-	-	-	-	-	-
CGG	G>	-	-	4	-	-	-	-	-	-	-	-	-	-	1	-	-	-	3	-	-	-	-	-	-	-	5	-	-	-	8	-	-	-	-	-	-
CGT	G>	-	-	2	-	-	1	-	-	-	-	-	-	-	1	-	-	-	-	-	-	-	-	-	-	-	-	-	-	-	-	-	-	-	1	-	-
CTA	T>	-	-	-	1	-	-	-	-	1	-	-	-	-	-	-	-	-	-	-	-	-	-	-	-	-	-	1	-	1	1	-	-	-	-	-	-
CTC	T>	-	-	-	3	-	-	-	-	-	-	-	-	-	-	-	-	-	-	-	-	-	-	-	-	-	-	-	-	-	-	-	-	-	-	-	-
CTG	T>	-	-	-	2	-	-	-	-	-	-	-	-	-	-	-	-	-	-	-	-	-	-	-	-	-	-	-	-	-	-	1	-	-	-	-	-
CTT	T>	-	-	-	6	-	-	-	-	-	-	-	-	-	-	-	-	-	-	-	-	-	-	-	-	-	-	-	-	-	1	-	-	-	-	-	-
GAA	A>	3	-	-	-	-	-	-	-	-	-	-	-	-	-	-	-	-	-	-	-	-	-	-	-	-	-	-	-	-	-	-	-	-	-	-	-
GAC	A>	2	-	-	-	-	-	-	-	-	-	-	-	-	-	-	-	-	-	-	-	-	-	-	-	-	-	-	-	-	-	-	-	-	-	1	-
GAG	A>	3	-	-	-	-	-	-	1	-	1	-	-	-	-	1	-	-	-	-	1	-	-	-	1	-	-	1	-	-	1	-	-	-	-	-	4
GAT	A>	5	-	-	-	-	-	-	-	-	-	-	-	-	-	-	-	-	-	-	-	-	-	-	-	-	-	-	-	-	-	-	-	-	-	-	-
GCA	C>	-	6	-	-	-	-	-	-	-	-	-	-	-	-	2	-	-	-	1	-	-	-	-	-	1	-	1	-	1	-	-	-	-	-	1	-
GCC	C>	-	4	-	-	-	-	-	-	-	-	-	-	-	-	-	-	-	-	-	-	-	-	-	-	-	-	-	-	-	-	-	-	-	-	-	-
GCG	C>	-	8	-	-	-	-	-	-	-	-	-	-	-	-	-	-	-	-	-	-	-	-	-	-	-	-	-	1	-	-	-	-	-	-	-	-
GCT	C>	-	2	-	-	-	-	-	-	-	-	-	-	-	-	-	-	-	-	-	-	-	-	-	-	-	-	-	-	-	-	-	-	-	-	-	-
GGA	G>	-	-	2	-	-	-	-	-	-	1	-	-	-	2	-	-	-	-	-	-	-	-	-	-	-	5	-	-	1	4	-	-	4	2	-	-
GGC	G>	-	-	6	-	-	-	-	-	-	-	-	-	-	-	-	-	-	-	-	-	-	-	-	-	-	-	-	-	-	-	-	-	-	-	-	-
GGG	G>	-	-	4	-	-	-	-	1	97	3	-	-	55	3	-	-	30	4	-	3	1	-	-	-	46	3	-	9	48	5	-	11	50	2	-	-
GGT	G>	-	-	3	-	-	-	-	-	23	-	-	-	16	-	-	-	10	1	-	-	-	-	-	-	22	-	-	1	11	-	-	-	16	1	-	-
GTA	T>	-	-	-	1	-	-	-	-	-	-	-	-	-	-	-	-	-	-	-	-	-	-	-	-	-	-	-	-	-	-	-	-	-	-	-	-
GTC	T>	-	-	-	3	-	-	-	-	-	-	-	-	-	-	-	-	-	-	-	-	-	-	-	-	-	-	-	-	-	-	-	-	-	-	-	-
GTG	T>	-	-	-	2	-	-	-	-	-	-	-	-	-	-	-	-	-	-	-	-	-	-	-	-	-	-	-	-	-	-	-	-	-	-	-	-
GTT	T>	-	-	-	2	-	-	-	-	-	2	3	-	-	-	1	-	-	1	1	-	-	-	9	-	-	2	1	-	-	1	-	-	-	-	-	-
TAA	A>	4	-	-	-	-	-	-	-	-	1	6	-	-	1	4	-	-	-	4	-	-	-	-	-	-	-	3	-	-	-	3	2	-	-	9	-
TAC	A>	2	-	-	-	-	-	-	-	-	-	-	-	-	-	-	-	-	-	-	-	-	-	-	-	-	-	-	-	-	-	-	-	-	-	-	-
TAG	A>	-	-	-	-	-	-	-	-	-	-	-	-	-	-	-	-	-	-	-	-	-	-	-	-	-	-	-	-	-	-	-	-	-	-	-	-
TAT	A>	3	-	-	-	-	-	-	-	-	-	-	-	-	-	-	-	-	-	1	-	-	-	-	-	-	-	-	1	-	-	-	-	-	-	1	-
TCA	C>	-	6	-	-	-	-	-	-	-	-	-	-	-	-	-	2	-	-	-	-	-	-	-	-	-	-	-	-	-	-	-	1	-	-	-	2
TCC	C>	-	7	-	-	2	-	2	-	1	-	5	103	-	-	2	97	-	-	11	97	-	-	-	-	8	-	27	108	5	-	15	148	1	-	2	133
TCG	C>	-	3	-	-	-	-	-	-	-	-	-	1	2	-	-	3	1	-	-	4	-	-	-	-	-	-	-	5	1	-	1	5	-	-	-	6
TCT	C>	-	2	-	-	-	-	1	-	2	-	30	-	1	-	14	-	-	-	12	-	1	-	-	-	3	-	28	2	2	-	24	4	1	-	21	2
TGA	G>	-	-	2	-	1	-	-	-	115	20	-	-	71	9	-	-	66	15	-	1	-	-	-	-	76	39	-	2	73	36	-	-	111	10	-	-
TGC	G>	-	-	2	-	-	1	-	-	-	-	-	-	-	-	-	-	-	1	-	-	-	-	-	-	-	-	-	-	-	-	-	-	-	1	-	-
TGG	G>	-	-	3	-	-	-	-	-	-	-	-	-	-	-	-	-	-	-	-	-	-	-	-	-	-	-	-	-	-	-	-	-	-	-	-	-
TGT	G>	-	-	1	-	-	-	-	-	-	-	-	-	-	-	-	-	-	-	-	-	-	-	-	-	-	-	-	-	-	-	-	-	-	-	-	-
TTA	T>	-	-	-	3	-	-	-	-	-	-	-	-	-	-	-	-	-	-	-	-	-	-	-	-	-	-	-	-	-	-	-	-	-	-	-	-
TTC	T>	-	-	-	6	-	-	-	-	-	-	1	-	-	-	-	-	1	-	-	-	-	-	1	-	-	-	-	-	-	1	-	-	1	-	-	-
TTG	T>	-	-	-	1	-	-	-	-	-	-	-	-	-	-	-	-	-	-	-	-	-	-	-	-	-	-	-	-	-	-	-	-	-	-	-	-
TTT	T>	-	-	-	3	-	-	-	-	-	-	-	-	-	-	-	-	-	-	-	-	-	-	-	-	-	-	-	-	-	-	-	-	-	-	-	-
