# Supplementary material for: Development of a versatile high-throughput mutagenesis assay with multiplexed short-read NGS using DNA-barcoded supF shuttle vector library amplified in E. coli
Source: eLife. 2022 Oct 10;11:e83780. doi: 10.7554/eLife.83780 (PMC9584611; doi:10.7554/eLife.83780)
Supplement: Supplementary file 6. [file elife-83780-supp6.xlsx]

## Sheet: 6A
Sample name	BC	Position	Ref - reference sequence	Ref1	Alt variant sequence	Depth - total coverage	AltDepth - variant coverage	RefFwdReads - reference forward strand coverage	Genotype - genotype description string	AF - allele frequency	Genotype
Lib10^4_#1 0_Jm^2 U2OS Sel PCR#1	TAG_BX_AAAAGCTCCCTC	134	C	C	A	101	63	32	C/A	0.6238	SNP
Lib10^4_#1 0_Jm^2 U2OS Sel PCR#1	TAG_BX_AAATGGGGGCCA	95	C	C	A	1038	805	143	C/A	0.7755	SNP
Lib10^4_#1 0_Jm^2 U2OS Sel PCR#1	TAG_BX_ACCCGGGCGAGT	-12	C	C	G	82	78	3	C/G	0.9512	SNP
Lib10^4_#1 0_Jm^2 U2OS Sel PCR#1	TAG_BX_ACTAGGTCCTGA	95	C	C	G	164	130	26	C/G	0.7927	SNP
Lib10^4_#1 0_Jm^2 U2OS Sel PCR#1	TAG_BX_ACTTGGCCAACT	101	C	C	A	140	112	20	C/A	0.8	SNP
Lib10^4_#1 0_Jm^2 U2OS Sel PCR#1	TAG_BX_ACTTGGCCAACT	111	C	C	T	140	114	23	C/T	0.8143	SNP
Lib10^4_#1 0_Jm^2 U2OS Sel PCR#1	TAG_BX_AGAATGCGTCAA	-56	G	GAA	TAG	3152	2854	16	GAA/TAG	0.9055	Del-In
Lib10^4_#1 0_Jm^2 U2OS Sel PCR#1	TAG_BX_AGAATGCGTCAA	-37	G	G	C	2874	2821	48	G/C	0.9816	SNP
Lib10^4_#1 0_Jm^2 U2OS Sel PCR#1	TAG_BX_AGAATGCGTCAA	27	G	G	A	2817	2385	297	G/A	0.8466	SNP
Lib10^4_#1 0_Jm^2 U2OS Sel PCR#1	TAG_BX_AGAATGCGTCAA	118	G	G	T	2817	2121	557	G/T	0.7529	SNP
Lib10^4_#1 0_Jm^2 U2OS Sel PCR#1	TAG_BX_AGAATGCGTCAA	197	G	G	A	2805	1895	906	G/A	0.6756	SNP
Lib10^4_#1 0_Jm^2 U2OS Sel PCR#1	TAG_BX_AGGATTCTCCTG	73	G	G	A	153	121	23	G/A	0.7908	SNP
Lib10^4_#1 0_Jm^2 U2OS Sel PCR#1	TAG_BX_AGGATTCTCCTG	85	G	G	A	153	118	24	G/A	0.7712	SNP
Lib10^4_#1 0_Jm^2 U2OS Sel PCR#1	TAG_BX_AGGATTCTCCTG	91	G	G	A	153	114	24	G/A	0.7451	SNP
Lib10^4_#1 0_Jm^2 U2OS Sel PCR#1	TAG_BX_AGTCTCACCTCT	5	G	G	C	1141	1040	53	G/C	0.9115	SNP
Lib10^4_#1 0_Jm^2 U2OS Sel PCR#1	TAG_BX_AGTTAACGTTCT	108	C	C	T	55	36	14	C/T	0.6545	SNP
Lib10^4_#1 0_Jm^2 U2OS Sel PCR#1	TAG_BX_AGTTAACGTTCT	117	C	C	T	55	37	15	C/T	0.6727	SNP
Lib10^4_#1 0_Jm^2 U2OS Sel PCR#1	TAG_BX_ATATTGGGTTCC	117	C	C	T	108	85	21	C/T	0.787	SNP
Lib10^4_#1 0_Jm^2 U2OS Sel PCR#1	TAG_BX_ATGCGCACTCAA	5	G	G	C	40	37	3	G/C	0.925	SNP
Lib10^4_#1 0_Jm^2 U2OS Sel PCR#1	TAG_BX_ATGCGGCCGGAT	5	G	G	C	845	778	39	G/C	0.9207	SNP
Lib10^4_#1 0_Jm^2 U2OS Sel PCR#1	TAG_BX_ATTTATGGGTAT	131	C	C	T	86	65	19	C/T	0.7558	SNP
Lib10^4_#1 0_Jm^2 U2OS Sel PCR#1	TAG_BX_ATTTTGTAGTTA	95	C	C	A	71	55	9	C/A	0.7746	SNP
Lib10^4_#1 0_Jm^2 U2OS Sel PCR#1	TAG_BX_CAACTAGACTTA	126	G	G	C	127	91	28	G/C	0.7165	SNP
Lib10^4_#1 0_Jm^2 U2OS Sel PCR#1	TAG_BX_CAACTAGACTTA	197	G	G	C	126	81	41	G/C	0.6429	SNP
Lib10^4_#1 0_Jm^2 U2OS Sel PCR#1	TAG_BX_CAGATTCTGGCA	126	G	G	C	661	513	115	G/C	0.7761	SNP
Lib10^4_#1 0_Jm^2 U2OS Sel PCR#1	TAG_BX_CAGGTTGGGGGG	104	C	CCGTCATCGACTTCGAAGGTTCGAATC		59	42	13	CCGTCATCGACTTCGAAGGTTCGAATC/	0.7119	Del
Lib10^4_#1 0_Jm^2 U2OS Sel PCR#1	TAG_BX_CAGTCAACGCGT	5	G	G	C	111	99	6	G/C	0.8919	SNP
Lib10^4_#1 0_Jm^2 U2OS Sel PCR#1	TAG_BX_CATTATGATCCT	86	G	G	C	82	63	14	G/C	0.7683	SNP
Lib10^4_#1 0_Jm^2 U2OS Sel PCR#1	TAG_BX_CCGGAAACATCG	101	C	C	G	456	352	76	C/G	0.7719	SNP
Lib10^4_#1 0_Jm^2 U2OS Sel PCR#1	TAG_BX_CCGGAAACATCG	160	C	C	G	457	330	115	C/G	0.7221	SNP
Lib10^4_#1 0_Jm^2 U2OS Sel PCR#1	TAG_BX_CCGTGATGTTCA	-3	G	G	A	74	70	3	G/A	0.9459	SNP
Lib10^4_#1 0_Jm^2 U2OS Sel PCR#1	TAG_BX_CCGTGATGTTCA	3	T	TTGAT	ATCAA	84	67	3	TTGAT/ATCAA	0.7976	Del-In
Lib10^4_#1 0_Jm^2 U2OS Sel PCR#1	TAG_BX_CCGTGATGTTCA	12	T	T	C	74	68	3	T/C	0.9189	SNP
Lib10^4_#1 0_Jm^2 U2OS Sel PCR#1	TAG_BX_CGCACTGCCCCC	91	G	G	C	85	68	12	G/C	0.8	SNP
Lib10^4_#1 0_Jm^2 U2OS Sel PCR#1	TAG_BX_CGCCGAGCGACT	118	G	G	C	254	203	36	G/C	0.7992	SNP
Lib10^4_#1 0_Jm^2 U2OS Sel PCR#1	TAG_BX_CGGCGTTGTTTG	91	G	G	C	79	61	12	G/C	0.7722	SNP
Lib10^4_#1 0_Jm^2 U2OS Sel PCR#1	TAG_BX_CGGGCGTGTTTT	56	C	CCTGTGGTGGGGTTCCCGAGCGGCCAAAGGGAGCAGACTCTAAATCTGCCGTCATCGACTTCGAAGGTTCGAATCCTT		331	261	45	CCTGTGGTGGGGTTCCCGAGCGGCCAAAGGGAGCAGACTCTAAATCTGCCGTCATCGACTTCGAAGGTTCGAATCCTT/	0.7885	Del
Lib10^4_#1 0_Jm^2 U2OS Sel PCR#1	TAG_BX_CGTCGGTATTGG	12	T	T	C	190	155	13	T/C	0.8158	SNP
Lib10^4_#1 0_Jm^2 U2OS Sel PCR#1	TAG_BX_CGTGTGCTACTA	5	G	G	C	402	372	19	G/C	0.9254	SNP
Lib10^4_#1 0_Jm^2 U2OS Sel PCR#1	TAG_BX_CGTGTGCTACTA	167	G	G	C	398	301	89	G/C	0.7563	SNP
Lib10^4_#1 0_Jm^2 U2OS Sel PCR#1	TAG_BX_CGTTGGTATTGT	-17	C	CTTTACAGCGGCGCGTCATTTGATATGATGCGCCCCGCTTCCCGATAAGGGAGCAGGCCAGTAAAAGCATTACCTGTGGTGGGGTTCCCGAGCGGCCAAAGGGAGCAGACTCTAAATCTGCCGTCATCGACTTCGAAGGTTCGAATCCTTCCCCCACCACCATCACTTTCAAAAGTCCGAAAAGATCCGGCGGCGCAGCACCTCATCCTC		15489	14584	457	CTTTACAGCGGCGCGTCATTTGATATGATGCGCCCCGCTTCCCGATAAGGGAGCAGGCCAGTAAAAGCATTACCTGTGGTGGGGTTCCCGAGCGGCCAAAGGGAGCAGACTCTAAATCTGCCGTCATCGACTTCGAAGGTTCGAATCCTTCCCCCACCACCATCACTTTCAAAAGTCCGAAAAGATCCGGCGGCGCAGCACCTCATCCTC/	0.9416	Del
Lib10^4_#1 0_Jm^2 U2OS Sel PCR#1	TAG_BX_CTTCCTGTCGGA	-19	C	CACTTTACAGCGGCGCGTCATTTGATATGATGCGCCCC		35	28	7	CACTTTACAGCGGCGCGTCATTTGATATGATGCGCCCC/	0.8	Del
Lib10^4_#1 0_Jm^2 U2OS Sel PCR#1	TAG_BX_CTTGAAATGCTC	12	T	T	C	101	90	8	T/C	0.8911	SNP
Lib10^4_#1 0_Jm^2 U2OS Sel PCR#1	TAG_BX_CTTTGTTTACAG	101	C	C	G	170	133	24	C/G	0.7824	SNP
Lib10^4_#1 0_Jm^2 U2OS Sel PCR#1	TAG_BX_GACAGCATTTGA	126	G	G	C	140	106	27	G/C	0.7571	SNP
Lib10^4_#1 0_Jm^2 U2OS Sel PCR#1	TAG_BX_GACGCCGGCCAT	-39	C	C	G	3510	3477	26	C/G	0.9906	SNP
Lib10^4_#1 0_Jm^2 U2OS Sel PCR#1	TAG_BX_GACGCCGGCCAT	-15	T	T	G	3486	896	2558	T/G	0.257	SNP
Lib10^4_#1 0_Jm^2 U2OS Sel PCR#1	TAG_BX_GACGCCGGCCAT	101	C	C	G	3446	2770	518	C/G	0.8038	SNP
Lib10^4_#1 0_Jm^2 U2OS Sel PCR#1	TAG_BX_GACTTGGCGTTG	-3	G	G	A	10434	9900	131	G/A	0.9488	SNP
Lib10^4_#1 0_Jm^2 U2OS Sel PCR#1	TAG_BX_GACTTGGCGTTG	3	T	TTGATATGATGCGCCCCGCTTCCCGATAAGGGAGCAGGCCAGTAAAAGCATTACCTGTGGTGGGGTTCCCGAGCGGCCAAAGGGAGCAGACTCTAAATCTGCCGTC	ATCAA	10426	9757	142	TTGATATGATGCGCCCCGCTTCCCGATAAGGGAGCAGGCCAGTAAAAGCATTACCTGTGGTGGGGTTCCCGAGCGGCCAAAGGGAGCAGACTCTAAATCTGCCGTC/ATCAA	0.9358	Del-In
Lib10^4_#1 0_Jm^2 U2OS Sel PCR#1	TAG_BX_GATACATGACCA	86	G	G	C	72	65	6	G/C	0.9028	SNP
Lib10^4_#1 0_Jm^2 U2OS Sel PCR#1	TAG_BX_GATGATTAGCTC	95	C	C	G	694	566	78	C/G	0.8156	SNP
Lib10^4_#1 0_Jm^2 U2OS Sel PCR#1	TAG_BX_GCCACTTCCTAC	12	T	T	C	672	595	50	T/C	0.8854	SNP
Lib10^4_#1 0_Jm^2 U2OS Sel PCR#1	TAG_BX_GCCGAGAGCAAG	-3	G	G	A	55	51	2	G/A	0.9273	SNP
Lib10^4_#1 0_Jm^2 U2OS Sel PCR#1	TAG_BX_GCCGAGAGCAAG	3	T	TTGAT	ATCAA	62	50	2	TTGAT/ATCAA	0.8065	Del-In
Lib10^4_#1 0_Jm^2 U2OS Sel PCR#1	TAG_BX_GCCGAGAGCAAG	12	T	T	C	55	50	2	T/C	0.9091	SNP
Lib10^4_#1 0_Jm^2 U2OS Sel PCR#1	TAG_BX_GCGAACTAAAAG	95	C	C	G	670	523	109	C/G	0.7806	SNP
Lib10^4_#1 0_Jm^2 U2OS Sel PCR#1	TAG_BX_GCGGTTGTTGCG	12	T	T	C	64	56	7	T/C	0.875	SNP
Lib10^4_#1 0_Jm^2 U2OS Sel PCR#1	TAG_BX_GCTGAGTGCGTA	26	C	C	T	90	87	3	C/T	0.9667	SNP
Lib10^4_#1 0_Jm^2 U2OS Sel PCR#1	TAG_BX_GCTGAGTGCGTA	108	C	C	A	90	79	11	C/A	0.8778	SNP
Lib10^4_#1 0_Jm^2 U2OS Sel PCR#1	TAG_BX_GCTGAGTGCGTA	130	C	CC	TA	101	79	11	CC/TA	0.7822	DNP
Lib10^4_#1 0_Jm^2 U2OS Sel PCR#1	TAG_BX_GCTGAGTGCGTA	153	C	C	T	89	75	14	C/T	0.8427	SNP
Lib10^4_#1 0_Jm^2 U2OS Sel PCR#1	TAG_BX_GCTGAGTGCGTA	160	C	C	T	89	73	15	C/T	0.8202	SNP
Lib10^4_#1 0_Jm^2 U2OS Sel PCR#1	TAG_BX_GGAGTACCGGTA	-3	G	G	A	492	431	8	G/A	0.876	SNP
Lib10^4_#1 0_Jm^2 U2OS Sel PCR#1	TAG_BX_GGAGTACCGGTA	3	T	TTGATATGATGCGCCCCGCTTCCCGATAAGGGAGCAGGCCAGTAAAAGCATTACCTGTGGTGGGGTTCCCGAGCGGCCAAAGGGAGCAGACTCTAAATCTGCCGTCATCGACTTC	ATCAAATGACGCATACAGGCTTCAAGATATCAAATGACATATCAAGATGCGTCAAGATATGTGGGG	491	340	8	TTGATATGATGCGCCCCGCTTCCCGATAAGGGAGCAGGCCAGTAAAAGCATTACCTGTGGTGGGGTTCCCGAGCGGCCAAAGGGAGCAGACTCTAAATCTGCCGTCATCGACTTC/ATCAAATGACGCATACAGGCTTCAAGATATCAAATGACATATCAAGATGCGTCAAGATATGTGGGG	0.6925	Del-In
Lib10^4_#1 0_Jm^2 U2OS Sel PCR#1	TAG_BX_GGAGTGATAAGG	95	C	C	G	77	63	9	C/G	0.8182	SNP
Lib10^4_#1 0_Jm^2 U2OS Sel PCR#1	TAG_BX_GGAGTTCTGCTT	117	C	C	T	139	103	24	C/T	0.741	SNP
Lib10^4_#1 0_Jm^2 U2OS Sel PCR#1	TAG_BX_GGATGCATTGGA	-27	C	C	T	106	104	2	C/T	0.9811	SNP
Lib10^4_#1 0_Jm^2 U2OS Sel PCR#1	TAG_BX_GGATGCATTGGA	95	C	C	G	105	84	15	C/G	0.8	SNP
Lib10^4_#1 0_Jm^2 U2OS Sel PCR#1	TAG_BX_GGATGCATTGGA	130	C	C	A	105	77	22	C/A	0.7333	SNP
Lib10^4_#1 0_Jm^2 U2OS Sel PCR#1	TAG_BX_GGCATATGGTTC	95	C	C	G	287	214	47	C/G	0.7456	SNP
Lib10^4_#1 0_Jm^2 U2OS Sel PCR#1	TAG_BX_GGCCCGCTAGTG	101	C	C	T	97	78	14	C/T	0.8041	SNP
Lib10^4_#1 0_Jm^2 U2OS Sel PCR#1	TAG_BX_GGCCCGCTAGTG	111	C	C	A	97	78	16	C/A	0.8041	SNP
Lib10^4_#1 0_Jm^2 U2OS Sel PCR#1	TAG_BX_GGCCCGCTAGTG	125	C	C	A	97	77	17	C/A	0.7938	SNP
Lib10^4_#1 0_Jm^2 U2OS Sel PCR#1	TAG_BX_GGCCCGCTAGTG	147	C	C	A	97	73	22	C/A	0.7526	SNP
Lib10^4_#1 0_Jm^2 U2OS Sel PCR#1	TAG_BX_GGGCGATTCCAG	95	C	C	A	404	320	52	C/A	0.7921	SNP
Lib10^4_#1 0_Jm^2 U2OS Sel PCR#1	TAG_BX_GGGGTATACTCG	117	C	C	A	120	94	19	C/A	0.7833	SNP
Lib10^4_#1 0_Jm^2 U2OS Sel PCR#1	TAG_BX_GGGTTACATATG	130	C	C	G	136	104	25	C/G	0.7647	SNP
Lib10^4_#1 0_Jm^2 U2OS Sel PCR#1	TAG_BX_GGGTTTACTGTT	118	G	G	A	414	316	74	G/A	0.7633	SNP
Lib10^4_#1 0_Jm^2 U2OS Sel PCR#1	TAG_BX_GGTATGTAAAGT	5	G	G	C	65	60	2	G/C	0.9231	SNP
Lib10^4_#1 0_Jm^2 U2OS Sel PCR#1	TAG_BX_GGTATGTAAAGT	162	G	G	C	65	48	14	G/C	0.7385	SNP
Lib10^4_#1 0_Jm^2 U2OS Sel PCR#1	TAG_BX_GGTTACGATTGA	65	G	G	C	3515	2933	388	G/C	0.8344	SNP
Lib10^4_#1 0_Jm^2 U2OS Sel PCR#1	TAG_BX_GGTTACGATTGA	118	G	G	A	3507	2735	537	G/A	0.7799	SNP
Lib10^4_#1 0_Jm^2 U2OS Sel PCR#1	TAG_BX_GGTTACGATTGA	126	G	G	T	3507	2762	578	G/T	0.7876	SNP
Lib10^4_#1 0_Jm^2 U2OS Sel PCR#1	TAG_BX_GGTTTGTAGTCT	117	C	C	A	106	84	18	C/A	0.7925	SNP
Lib10^4_#1 0_Jm^2 U2OS Sel PCR#1	TAG_BX_GTAAATTGGGTT	95	C	C	G	1030	822	127	C/G	0.7981	SNP
Lib10^4_#1 0_Jm^2 U2OS Sel PCR#1	TAG_BX_GTAAATTGGGTT	111	C	C	T	1031	811	162	C/T	0.7866	SNP
Lib10^4_#1 0_Jm^2 U2OS Sel PCR#1	TAG_BX_GTAAATTGGGTT	130	C	C	G	1031	795	170	C/G	0.7711	SNP
Lib10^4_#1 0_Jm^2 U2OS Sel PCR#1	TAG_BX_GTAAATTGGGTT	160	C	C	T	1030	770	221	C/T	0.7476	SNP
Lib10^4_#1 0_Jm^2 U2OS Sel PCR#1	TAG_BX_GTGATTTGTTTT	125	C	C	A	5054	4085	784	C/A	0.8083	SNP
Lib10^4_#1 0_Jm^2 U2OS Sel PCR#1	TAG_BX_GTGATTTGTTTT	130	C	C	T	5057	3983	839	C/T	0.7876	SNP
Lib10^4_#1 0_Jm^2 U2OS Sel PCR#1	TAG_BX_GTGCGTTAAGTG	-18	A	ACTTTACAGCGGCGCGTCATTTGATATGATGCGCCCCGCTTCCCGATAAGGGAGCAGGCCAGTAAAAGCATTACCTGTGGTGG		83	70	12	ACTTTACAGCGGCGCGTCATTTGATATGATGCGCCCCGCTTCCCGATAAGGGAGCAGGCCAGTAAAAGCATTACCTGTGGTGG/	0.8434	Del
Lib10^4_#1 0_Jm^2 U2OS Sel PCR#1	TAG_BX_GTGGGAAGGCTG	111	C	C	T	915	730	145	C/T	0.7978	SNP
Lib10^4_#1 0_Jm^2 U2OS Sel PCR#1	TAG_BX_GTGGGAAGGCTG	130	C	C	A	913	685	167	C/A	0.7503	SNP
Lib10^4_#1 0_Jm^2 U2OS Sel PCR#1	TAG_BX_GTGGGAAGGCTG	170	C	C	T	912	660	220	C/T	0.7237	SNP
Lib10^4_#1 0_Jm^2 U2OS Sel PCR#1	TAG_BX_GTGTTATGCCAT	-3	G	G	A	141	122	12	G/A	0.8652	SNP
Lib10^4_#1 0_Jm^2 U2OS Sel PCR#1	TAG_BX_GTGTTATGCCAT	3	T	TTGAT	ATCAA	161	116	13	TTGAT/ATCAA	0.7205	Del-In
Lib10^4_#1 0_Jm^2 U2OS Sel PCR#1	TAG_BX_GTGTTGCTAGAT	125	C	C		1853	1453	304	C/	0.7841	1Del
Lib10^4_#1 0_Jm^2 U2OS Sel PCR#1	TAG_BX_GTTCTCGTGTAT	131	C	C	G	393	293	84	C/G	0.7455	SNP
Lib10^4_#1 0_Jm^2 U2OS Sel PCR#1	TAG_BX_GTTTCAGGACTT	130	C	CC	TT	179	117	24	CC/TT	0.6536	DNP
Lib10^4_#1 0_Jm^2 U2OS Sel PCR#1	TAG_BX_GTTTCAGGACTT	130	C	C	T	179	28	24	C/T	0.1564	SNP
Lib10^4_#1 0_Jm^2 U2OS Sel PCR#1	TAG_BX_GTTTCAGGACTT	153	C	C	T	158	116	35	C/T	0.7342	SNP
Lib10^4_#1 0_Jm^2 U2OS Sel PCR#1	TAG_BX_GTTTCGGTCCGG	-19	C	CACTTTACAGCGGCGCGTCATTTGATATGATGCGCCCCGCTTCCCGATAAGGGAGCAGGCCAGTAAAAG		42	37	3	CACTTTACAGCGGCGCGTCATTTGATATGATGCGCCCCGCTTCCCGATAAGGGAGCAGGCCAGTAAAAG/	0.881	Del
Lib10^4_#1 0_Jm^2 U2OS Sel PCR#1	TAG_BX_TAATTCTATCAG	72	C	C	G	312	253	38	C/G	0.8109	SNP
Lib10^4_#1 0_Jm^2 U2OS Sel PCR#1	TAG_BX_TAATTCTATCAG	123	T	T	A	311	244	57	T/A	0.7846	SNP
Lib10^4_#1 0_Jm^2 U2OS Sel PCR#1	TAG_BX_TAATTCTATCAG	147	C	C	T	311	237	69	C/T	0.7621	SNP
Lib10^4_#1 0_Jm^2 U2OS Sel PCR#1	TAG_BX_TAGATAGCTGGT	5	G	G	A	49	44	2	G/A	0.898	SNP
Lib10^4_#1 0_Jm^2 U2OS Sel PCR#1	TAG_BX_TAGCGATGTCGC	126	G	G	C	119	95	18	G/C	0.7983	SNP
Lib10^4_#1 0_Jm^2 U2OS Sel PCR#1	TAG_BX_TAGGGTGCGTTA	-56	G	G	T	174	173	1	G/T	0.9943	SNP
Lib10^4_#1 0_Jm^2 U2OS Sel PCR#1	TAG_BX_TAGGGTGCGTTA	91	G	G	C	173	134	30	G/C	0.7746	SNP
Lib10^4_#1 0_Jm^2 U2OS Sel PCR#1	TAG_BX_TATTAGAGCGCA	5	G	G	C	371	340	11	G/C	0.9164	SNP
Lib10^4_#1 0_Jm^2 U2OS Sel PCR#1	TAG_BX_TCAAAATCTATT	2	T	TTTGATAT		61	52	6	TTTGATAT/	0.8525	Del
Lib10^4_#1 0_Jm^2 U2OS Sel PCR#1	TAG_BX_TCATATATTGTG	95	C	C	G	450	358	62	C/G	0.7956	SNP
Lib10^4_#1 0_Jm^2 U2OS Sel PCR#1	TAG_BX_TCCCGGATGCTT	73	G	G	C	205	163	34	G/C	0.7951	SNP
Lib10^4_#1 0_Jm^2 U2OS Sel PCR#1	TAG_BX_TCCCGGATGCTT	126	G	G	C	205	151	46	G/C	0.7366	SNP
Lib10^4_#1 0_Jm^2 U2OS Sel PCR#1	TAG_BX_TCCGATATTGTC	111	C	C	T	364	288	64	C/T	0.7912	SNP
Lib10^4_#1 0_Jm^2 U2OS Sel PCR#1	TAG_BX_TCCGATATTGTC	117	C	C	A	364	286	67	C/A	0.7857	SNP
Lib10^4_#1 0_Jm^2 U2OS Sel PCR#1	TAG_BX_TCTGTATGATTA	95	C	C	G	80	60	15	C/G	0.75	SNP
Lib10^4_#1 0_Jm^2 U2OS Sel PCR#1	TAG_BX_TCTTATAGTCGG	-17	C	CTTTACAGCGGCGCGTCATTTGATATGATGCGCCCCGCTTCCCGATAAGGGAGCAGGCCAGTAAAAGCATTACCTGTGGTGGGGTTCCCGAGCGGCCAAAGGGAGCAGACTCTAAATCTGCCGTCATCGACTTCGAAGGTTCGAATCCTTCCCCCACCACCATCACTTTCAAAAGTCCGAAAAGATCCGGCGGCGCAGCACCTCATCCTC		1646	760	856	CTTTACAGCGGCGCGTCATTTGATATGATGCGCCCCGCTTCCCGATAAGGGAGCAGGCCAGTAAAAGCATTACCTGTGGTGGGGTTCCCGAGCGGCCAAAGGGAGCAGACTCTAAATCTGCCGTCATCGACTTCGAAGGTTCGAATCCTTCCCCCACCACCATCACTTTCAAAAGTCCGAAAAGATCCGGCGGCGCAGCACCTCATCCTC/	0.4617	Del
Lib10^4_#1 0_Jm^2 U2OS Sel PCR#1	TAG_BX_TCTTATAGTCGG	-4	C	CGTCATTTGATATGATGCGCCCCGCTTCCCGATAAGGGAGCAGGCCAGTAAAAGCATTACCTGTGGTGGGGTTCCCGAGCGGCCAAAGGGAGCAGACTCTAAATCTGCCGTCATCGACTTCGAAGGTTCGAATCCTTCCCC		1637	236	605	CGTCATTTGATATGATGCGCCCCGCTTCCCGATAAGGGAGCAGGCCAGTAAAAGCATTACCTGTGGTGGGGTTCCCGAGCGGCCAAAGGGAGCAGACTCTAAATCTGCCGTCATCGACTTCGAAGGTTCGAATCCTTCCCC/	0.1442	Del
Lib10^4_#1 0_Jm^2 U2OS Sel PCR#1	TAG_BX_TCTTATAGTCGG	-3	G	G	A	1636	279	323	G/A	0.1705	SNP
Lib10^4_#1 0_Jm^2 U2OS Sel PCR#1	TAG_BX_TCTTATAGTCGG	3	T	TTGATATGATGCGCCCCGCTTCCCGATAAGGGAGCAGGCCAGTAAAAGCATTACCTGTGGTGGGGTTCCCGAGCGGCCAAAGGGAGCAGACTCTAAATCTGCCGTC	ATCAA	1629	186	345	TTGATATGATGCGCCCCGCTTCCCGATAAGGGAGCAGGCCAGTAAAAGCATTACCTGTGGTGGGGTTCCCGAGCGGCCAAAGGGAGCAGACTCTAAATCTGCCGTC/ATCAA	0.1142	Del-In
Lib10^4_#1 0_Jm^2 U2OS Sel PCR#1	TAG_BX_TCTTCCATTTGG	95	C	C	G	51	41	7	C/G	0.8039	SNP
Lib10^4_#1 0_Jm^2 U2OS Sel PCR#1	TAG_BX_TCTTTTTACCTG	95	C	C	G	65	51	10	C/G	0.7846	SNP
Lib10^4_#1 0_Jm^2 U2OS Sel PCR#1	TAG_BX_TGAGTTAGTGGA	-39	C	C	G	1945	1916	28	C/G	0.9851	SNP
Lib10^4_#1 0_Jm^2 U2OS Sel PCR#1	TAG_BX_TGAGTTAGTGGA	95	C	C	G	1903	1547	250	C/G	0.8129	SNP
Lib10^4_#1 0_Jm^2 U2OS Sel PCR#1	TAG_BX_TGATCAGTCGTT	85	G	G	A	83	72	6	G/A	0.8675	SNP
Lib10^4_#1 0_Jm^2 U2OS Sel PCR#1	TAG_BX_TGCTGCTGGAGG	-38	G	GGATCCTTTCTCAACGTAACACTTTACAGCGGCGCGTCATTTGATATGAT		201	188	10	GGATCCTTTCTCAACGTAACACTTTACAGCGGCGCGTCATTTGATATGAT/	0.9353	Del
Lib10^4_#1 0_Jm^2 U2OS Sel PCR#1	TAG_BX_TGTACGCGGTTG	-4	C	CGTCATTTGATATGATGCGCCCCGCTTCCCGATAAGGGAGCAGGCCAGTAAAAGCATTACCTGTGGTGGGGTTCCCGAGCGGCCAAAGGGAGCAGACTCTAAATCTGCCGTCATCGACTTCGAAGGTTCGAATCCTTCCCC		9094	8682	214	CGTCATTTGATATGATGCGCCCCGCTTCCCGATAAGGGAGCAGGCCAGTAAAAGCATTACCTGTGGTGGGGTTCCCGAGCGGCCAAAGGGAGCAGACTCTAAATCTGCCGTCATCGACTTCGAAGGTTCGAATCCTTCCCC/	0.9547	Del
Lib10^4_#1 0_Jm^2 U2OS Sel PCR#1	TAG_BX_TGTCCGCTGCAT	35	A	AGCAGGCCAGTAAAAGCATTACCTGTGGTGGGGTTCCCGAGCGGCCAAAGGGAGCAGACTCTAAATCTGCCGTCATCGACTTCGAAGGTTCGAATCCTTCCCCCACCACCATCACTTTCAAAAGTCCGAA		343	303	16	AGCAGGCCAGTAAAAGCATTACCTGTGGTGGGGTTCCCGAGCGGCCAAAGGGAGCAGACTCTAAATCTGCCGTCATCGACTTCGAAGGTTCGAATCCTTCCCCCACCACCATCACTTTCAAAAGTCCGAA/	0.8834	Del
Lib10^4_#1 0_Jm^2 U2OS Sel PCR#1	TAG_BX_TTACTGGATTTT	95	C	C	G	82	66	11	C/G	0.8049	SNP
Lib10^4_#1 0_Jm^2 U2OS Sel PCR#1	TAG_BX_TTACTGGATTTT	130	C	C	A	82	63	12	C/A	0.7683	SNP
Lib10^4_#1 0_Jm^2 U2OS Sel PCR#1	TAG_BX_TTACTGGATTTT	134	C	C	T	82	64	14	C/T	0.7805	SNP
Lib10^4_#1 0_Jm^2 U2OS Sel PCR#1	TAG_BX_TTACTGGATTTT	147	C	C	T	82	64	15	C/T	0.7805	SNP
Lib10^4_#1 0_Jm^2 U2OS Sel PCR#1	TAG_BX_TTACTGGATTTT	170	C	C	T	82	60	18	C/T	0.7317	SNP
Lib10^4_#1 0_Jm^2 U2OS Sel PCR#1	TAG_BX_TTATCTTAGTTG	101	C	C	A	510	362	98	C/A	0.7098	SNP
Lib10^4_#1 0_Jm^2 U2OS Sel PCR#1	TAG_BX_TTATTTGTCGTG	130	C	C	A	48	36	9	C/A	0.75	SNP
Lib10^4_#1 0_Jm^2 U2OS Sel PCR#1	TAG_BX_TTCAATTCGTAC	101	C	C	A	190	152	27	C/A	0.8	SNP
Lib10^4_#1 0_Jm^2 U2OS Sel PCR#1	TAG_BX_TTCACTAAGCCG	101	C	C	A	216	172	30	C/A	0.7963	SNP
Lib10^4_#1 0_Jm^2 U2OS Sel PCR#1	TAG_BX_TTCTATGGGTGT	27	G	G	A	621	533	56	G/A	0.8583	SNP
Lib10^4_#1 0_Jm^2 U2OS Sel PCR#1	TAG_BX_TTCTATGGGTGT	91	G	G	A	621	494	75	G/A	0.7955	SNP
Lib10^4_#1 0_Jm^2 U2OS Sel PCR#1	TAG_BX_TTCTATGGGTGT	112	G	G	T	621	498	96	G/T	0.8019	SNP
Lib10^4_#1 0_Jm^2 U2OS Sel PCR#1	TAG_BX_TTGCTCCCGTTG	-17	C	CTTTACAGCGGCGCGTCATTTGATATGATGCGCCCCGCTTCCCGATAAGGGAGCAGGCCAGTAAAAGCATTACCTGTGGTGGGGTTCCCGAGCGGCCAAAGGGAGCAGACTCTAAATCTGCCGTCATCGACTTCGAAGGTTCGAATCCTTCCCCCACCACCATCACTTTCAAAAGTCCGAAAAGATCCGGCGGCGCAGCACCTCATCCTC		2276	2035	152	CTTTACAGCGGCGCGTCATTTGATATGATGCGCCCCGCTTCCCGATAAGGGAGCAGGCCAGTAAAAGCATTACCTGTGGTGGGGTTCCCGAGCGGCCAAAGGGAGCAGACTCTAAATCTGCCGTCATCGACTTCGAAGGTTCGAATCCTTCCCCCACCACCATCACTTTCAAAAGTCCGAAAAGATCCGGCGGCGCAGCACCTCATCCTC/	0.8941	Del
Lib10^4_#1 0_Jm^2 U2OS Sel PCR#1	TAG_BX_TTGCTCCCGTTG	-4	C	CGTCATTTGATATGATGCGCCCCGCTTCCCGATAAGGGAGCAGGCCAGTAAAAGCATTACCTGTGGTGGGGTTCCCGAGCGGCCAAAGGGAGCAGACTCTAAATCTGCCGTCATCGACTTCGAAGGTTCGAATCCTTCCCC		453	57	94	CGTCATTTGATATGATGCGCCCCGCTTCCCGATAAGGGAGCAGGCCAGTAAAAGCATTACCTGTGGTGGGGTTCCCGAGCGGCCAAAGGGAGCAGACTCTAAATCTGCCGTCATCGACTTCGAAGGTTCGAATCCTTCCCC/	0.1258	Del
Lib10^4_#1 0_Jm^2 U2OS Sel PCR#1	TAG_BX_TTTCCCGTGGTT	117	C	C	A	198	163	29	C/A	0.8232	SNP
Lib10^4_#1 0_Jm^2 U2OS Sel PCR#1	TAG_BX_TTTTGCTTTTGC	5	G	G	C	68	58	6	G/C	0.8529	SNP
Lib10^4_#1 50_Jm^2 U2OS Sel PCR#1	TAG_BX_AAACATGTGGTT	20	G	GCTTCCCGATAAGGGAGCAGGCCAGTAAAAGCATTACCTGTGGTGGGGTTCCCGAGCG		86	75	7	GCTTCCCGATAAGGGAGCAGGCCAGTAAAAGCATTACCTGTGGTGGGGTTCCCGAGCG/	0.8721	Del
Lib10^4_#1 50_Jm^2 U2OS Sel PCR#1	TAG_BX_AAACTTACGGGG	85	G	G	A	280	224	51	G/A	0.8	SNP
Lib10^4_#1 50_Jm^2 U2OS Sel PCR#1	TAG_BX_AAAGGGGACCTA	134	C	C	A	144	105	36	C/A	0.7292	SNP
Lib10^4_#1 50_Jm^2 U2OS Sel PCR#1	TAG_BX_AAAGTAGGGGCT	5	G	G	C	40	39	1	G/C	0.975	SNP
Lib10^4_#1 50_Jm^2 U2OS Sel PCR#1	TAG_BX_AAAGTAGGGGCT	27	G	G	A	40	39	1	G/A	0.975	SNP
Lib10^4_#1 50_Jm^2 U2OS Sel PCR#1	TAG_BX_AAATTGATAGGG	117	C	C	T	16	11	4	C/T	0.6875	SNP
Lib10^4_#1 50_Jm^2 U2OS Sel PCR#1	TAG_BX_AACGGTAGTAGC	89	C	CA	AT	97	69	15	CA/AT	0.7113	DNP
Lib10^4_#1 50_Jm^2 U2OS Sel PCR#1	TAG_BX_AACGGTAGTAGC	89	C	C	A	97	11	15	C/A	0.1134	SNP
Lib10^4_#1 50_Jm^2 U2OS Sel PCR#1	TAG_BX_AACGTAGACGGG	130	C	C	T	152	122	30	C/T	0.8026	SNP
Lib10^4_#1 50_Jm^2 U2OS Sel PCR#1	TAG_BX_AACTTCTGGCGC	118	G	G	A	97	74	22	G/A	0.7629	SNP
Lib10^4_#1 50_Jm^2 U2OS Sel PCR#1	TAG_BX_AAGTGAGCCACT	64	G	GG	AA	103	77	20	GG/AA	0.7476	DNP
Lib10^4_#1 50_Jm^2 U2OS Sel PCR#1	TAG_BX_AATCTACGCGAC	95	C	C	G	47	36	9	C/G	0.766	SNP
Lib10^4_#1 50_Jm^2 U2OS Sel PCR#1	TAG_BX_AATCTACGCGAC	153	C	C	T	47	35	10	C/T	0.7447	SNP
Lib10^4_#1 50_Jm^2 U2OS Sel PCR#1	TAG_BX_AATGGTTATGGC	-16	T	T	C	351	335	14	T/C	0.9544	SNP
Lib10^4_#1 50_Jm^2 U2OS Sel PCR#1	TAG_BX_AATTGGTTTCTG	118	G	G	A	83	68	13	G/A	0.8193	SNP
Lib10^4_#1 50_Jm^2 U2OS Sel PCR#1	TAG_BX_AATTTGTGTGCG	121	G	G	A	130	90	37	G/A	0.6923	SNP
Lib10^4_#1 50_Jm^2 U2OS Sel PCR#1	TAG_BX_ACAACAGACTTC	118	G	GA	AC	186	117	27	GA/AC	0.629	DNP
Lib10^4_#1 50_Jm^2 U2OS Sel PCR#1	TAG_BX_ACACGCTCGGCG	-12	C	C	G	94	90	4	C/G	0.9574	SNP
Lib10^4_#1 50_Jm^2 U2OS Sel PCR#1	TAG_BX_ACACTATGCCTC	117	C	C	T	13	10	2	C/T	0.7692	SNP
Lib10^4_#1 50_Jm^2 U2OS Sel PCR#1	TAG_BX_ACAGATTCGACA	101	C	C	T	206	185	19	C/T	0.8981	SNP
Lib10^4_#1 50_Jm^2 U2OS Sel PCR#1	TAG_BX_ACAGATTCGACA	111	C	C	A	206	184	18	C/A	0.8932	SNP
Lib10^4_#1 50_Jm^2 U2OS Sel PCR#1	TAG_BX_ACAGATTCGACA	125	C	C	A	206	181	23	C/A	0.8786	SNP
Lib10^4_#1 50_Jm^2 U2OS Sel PCR#1	TAG_BX_ACAGATTCGACA	187	C	C	G	205	163	41	C/G	0.7951	SNP
Lib10^4_#1 50_Jm^2 U2OS Sel PCR#1	TAG_BX_ACATGTGTAGAG	131	C	C	T	95	63	30	C/T	0.6632	SNP
Lib10^4_#1 50_Jm^2 U2OS Sel PCR#1	TAG_BX_ACATGTTAAGAA	122	G	G	A	103	84	17	G/A	0.8155	SNP
Lib10^4_#1 50_Jm^2 U2OS Sel PCR#1	TAG_BX_ACATTTTTTGAG	130	C	C	T	41	32	8	C/T	0.7805	SNP
Lib10^4_#1 50_Jm^2 U2OS Sel PCR#1	TAG_BX_ACCATTTATCGC	121	G	G	A	79	60	17	G/A	0.7595	SNP
Lib10^4_#1 50_Jm^2 U2OS Sel PCR#1	TAG_BX_ACCCTTATCGGA	85	G	G	A	40	36	4	G/A	0.9	SNP
Lib10^4_#1 50_Jm^2 U2OS Sel PCR#1	TAG_BX_ACCCTTATCGGA	121	G	G	A	39	34	5	G/A	0.8718	SNP
Lib10^4_#1 50_Jm^2 U2OS Sel PCR#1	TAG_BX_ACCGGTCTCGTA	118	G	G	A	217	178	34	G/A	0.8203	SNP
Lib10^4_#1 50_Jm^2 U2OS Sel PCR#1	TAG_BX_ACCTCGTCCCAG	27	G	G	A	71	61	7	G/A	0.8592	SNP
Lib10^4_#1 50_Jm^2 U2OS Sel PCR#1	TAG_BX_ACCTCGTCCCAG	118	G	G	A	71	52	14	G/A	0.7324	SNP
Lib10^4_#1 50_Jm^2 U2OS Sel PCR#1	TAG_BX_ACGGTAGGTTAT	131	C	C	T	81	60	19	C/T	0.7407	SNP
Lib10^4_#1 50_Jm^2 U2OS Sel PCR#1	TAG_BX_ACGTATAGAGAG	82	A	A	G	91	75	15	A/G	0.8242	SNP
Lib10^4_#1 50_Jm^2 U2OS Sel PCR#1	TAG_BX_ACGTCTGAGCTA	5	G	G	A	36	33	2	G/A	0.9167	SNP
Lib10^4_#1 50_Jm^2 U2OS Sel PCR#1	TAG_BX_ACGTGGGTAGTA	91	G	G	C	89	72	14	G/C	0.809	SNP
Lib10^4_#1 50_Jm^2 U2OS Sel PCR#1	TAG_BX_ACTAGGCCTTGG	140	C	CC	AT	89	64	19	CC/AT	0.7191	DNP
Lib10^4_#1 50_Jm^2 U2OS Sel PCR#1	TAG_BX_ACTATTGGCTTT	118	G	G	A	78	62	14	G/A	0.7949	SNP
Lib10^4_#1 50_Jm^2 U2OS Sel PCR#1	TAG_BX_ACTCTCATGTCT	5	G	G	A	53	50	1	G/A	0.9434	SNP
Lib10^4_#1 50_Jm^2 U2OS Sel PCR#1	TAG_BX_ACTTATCGGTGA	5	G	G	A	22	22	0	G/A	1	SNP
Lib10^4_#1 50_Jm^2 U2OS Sel PCR#1	TAG_BX_ACTTTCTCGGTG	121	G	GG	AA	98	65	16	GG/AA	0.6633	DNP
Lib10^4_#1 50_Jm^2 U2OS Sel PCR#1	TAG_BX_ACTTTCTCGGTG	121	G	G	A	98	15	16	G/A	0.1531	SNP
Lib10^4_#1 50_Jm^2 U2OS Sel PCR#1	TAG_BX_AGACTCCGTTTT	85	G	G	A	72	57	13	G/A	0.7917	SNP
Lib10^4_#1 50_Jm^2 U2OS Sel PCR#1	TAG_BX_AGACTGTGATAG	126	G	G	T	89	69	16	G/T	0.7753	SNP
Lib10^4_#1 50_Jm^2 U2OS Sel PCR#1	TAG_BX_AGAGGTGGTGAT	131	C	C	T	46	33	10	C/T	0.7174	SNP
Lib10^4_#1 50_Jm^2 U2OS Sel PCR#1	TAG_BX_AGCAATTCGGTA	112	G	G	A	27	18	8	G/A	0.6667	SNP
Lib10^4_#1 50_Jm^2 U2OS Sel PCR#1	TAG_BX_AGCAATTCGGTA	118	G	G	A	27	20	7	G/A	0.7407	SNP
Lib10^4_#1 50_Jm^2 U2OS Sel PCR#1	TAG_BX_AGCCAAATAATG	120	A	AG	TA	175	118	37	AG/TA	0.6743	DNP
Lib10^4_#1 50_Jm^2 U2OS Sel PCR#1	TAG_BX_AGCCAGTTACGG	130	C	C	T	48	34	11	C/T	0.7083	SNP
Lib10^4_#1 50_Jm^2 U2OS Sel PCR#1	TAG_BX_AGCCTGAATTTT	84	G	GGG	AAT	585	426	94	GGG/AAT	0.7282	Del-In
Lib10^4_#1 50_Jm^2 U2OS Sel PCR#1	TAG_BX_AGCCTGAATTTT	126	G	G	A	527	400	123	G/A	0.759	SNP
Lib10^4_#1 50_Jm^2 U2OS Sel PCR#1	TAG_BX_AGCCTGCTACCT	-12	C	CAGCGGCGCGTCATTTGATATGATGCGCCCCGCTTCCCGATAAGGGAGCAGGCCAGTAAAAGCATTACCTGTGGTGGGGTTCCCGAG		125	113	8	CAGCGGCGCGTCATTTGATATGATGCGCCCCGCTTCCCGATAAGGGAGCAGGCCAGTAAAAGCATTACCTGTGGTGGGGTTCCCGAG/	0.904	Del
Lib10^4_#1 50_Jm^2 U2OS Sel PCR#1	TAG_BX_AGCGGTTGATAA	130	C	C	T	144	111	29	C/T	0.7708	SNP
Lib10^4_#1 50_Jm^2 U2OS Sel PCR#1	TAG_BX_AGCGTTAGGCTT	121	G	G	C	58	41	14	G/C	0.7069	SNP
Lib10^4_#1 50_Jm^2 U2OS Sel PCR#1	TAG_BX_AGCTTGGCTTCT	85	G	G	A	53	42	11	G/A	0.7925	SNP
Lib10^4_#1 50_Jm^2 U2OS Sel PCR#1	TAG_BX_AGCTTGGTGACG	117	C	C	T	25	19	5	C/T	0.76	SNP
Lib10^4_#1 50_Jm^2 U2OS Sel PCR#1	TAG_BX_AGGCCGCAGGGC	118	G	G	A	116	95	18	G/A	0.819	SNP
Lib10^4_#1 50_Jm^2 U2OS Sel PCR#1	TAG_BX_AGGCGTAATGAA	130	C	C	T	55	38	15	C/T	0.6909	SNP
Lib10^4_#1 50_Jm^2 U2OS Sel PCR#1	TAG_BX_AGGCGTTTATTG	-31	T	T	C	78	78	0	T/C	1	SNP
Lib10^4_#1 50_Jm^2 U2OS Sel PCR#1	TAG_BX_AGGCGTTTATTG	117	C	C	T	76	55	20	C/T	0.7237	SNP
Lib10^4_#1 50_Jm^2 U2OS Sel PCR#1	TAG_BX_AGGCTGCCACAT	131	C	C	T	86	67	17	C/T	0.7791	SNP
Lib10^4_#1 50_Jm^2 U2OS Sel PCR#1	TAG_BX_AGGCTTATATGC	84	G	GG	AA	136	102	27	GG/AA	0.75	DNP
Lib10^4_#1 50_Jm^2 U2OS Sel PCR#1	TAG_BX_AGGGTTTTGAGG	130	C	C	G	131	104	25	C/G	0.7939	SNP
Lib10^4_#1 50_Jm^2 U2OS Sel PCR#1	TAG_BX_AGGTCGTTAGCA	95	C	C	A	2229	1742	401	C/A	0.7815	SNP
Lib10^4_#1 50_Jm^2 U2OS Sel PCR#1	TAG_BX_AGGTCGTTAGCA	117	C	C	T	2226	1756	399	C/T	0.7889	SNP
Lib10^4_#1 50_Jm^2 U2OS Sel PCR#1	TAG_BX_AGGTCGTTAGCA	153	C	C	T	2221	1681	516	C/T	0.7569	SNP
Lib10^4_#1 50_Jm^2 U2OS Sel PCR#1	TAG_BX_AGGTGCGTGTGT	134	C	C		233	165	62	C/	0.7082	1Del
Lib10^4_#1 50_Jm^2 U2OS Sel PCR#1	TAG_BX_AGTAGATCTAGG	5	G	G	A	73	64	6	G/A	0.8767	SNP
Lib10^4_#1 50_Jm^2 U2OS Sel PCR#1	TAG_BX_AGTGAGATTGGT	84	G	GG	AT	89	65	16	GG/AT	0.7303	DNP
Lib10^4_#1 50_Jm^2 U2OS Sel PCR#1	TAG_BX_AGTGTACCGCCC	121	G	G	A	205	155	44	G/A	0.7561	SNP
Lib10^4_#1 50_Jm^2 U2OS Sel PCR#1	TAG_BX_AGTGTGGACTTA	118	G	G	A	143	112	25	G/A	0.7832	SNP
Lib10^4_#1 50_Jm^2 U2OS Sel PCR#1	TAG_BX_AGTTAAGGGTGG	122	G	G	A	259	200	56	G/A	0.7722	SNP
Lib10^4_#1 50_Jm^2 U2OS Sel PCR#1	TAG_BX_AGTTCCTATCCC	118	G	G	A	98	73	19	G/A	0.7449	SNP
Lib10^4_#1 50_Jm^2 U2OS Sel PCR#1	TAG_BX_ATAACGTATTAT	117	C	C	T	19	13	6	C/T	0.6842	SNP
Lib10^4_#1 50_Jm^2 U2OS Sel PCR#1	TAG_BX_ATAACGTATTAT	118	G	G	A	19	2	17	G/A	0.1053	SNP
Lib10^4_#1 50_Jm^2 U2OS Sel PCR#1	TAG_BX_ATAACTGTGATC	130	C	CC	TT	54	30	16	CC/TT	0.5556	DNP
Lib10^4_#1 50_Jm^2 U2OS Sel PCR#1	TAG_BX_ATAACTGTGATC	130	C	C	T	54	7	16	C/T	0.1296	SNP
Lib10^4_#1 50_Jm^2 U2OS Sel PCR#1	TAG_BX_ATACAATATTTC	97	A	AAATCTGCCGTCATCGACTTCGAAGGTTCG		214	168	39	AAATCTGCCGTCATCGACTTCGAAGGTTCG/	0.785	Del
Lib10^4_#1 50_Jm^2 U2OS Sel PCR#1	TAG_BX_ATACCCCTGAAC	66	G	GG	AA	82	54	19	GG/AA	0.6585	DNP
Lib10^4_#1 50_Jm^2 U2OS Sel PCR#1	TAG_BX_ATACGGTTGACG	118	G	G	A	66	57	8	G/A	0.8636	SNP
Lib10^4_#1 50_Jm^2 U2OS Sel PCR#1	TAG_BX_ATATGTATTAAT	122	G	G	A	57	44	11	G/A	0.7719	SNP
Lib10^4_#1 50_Jm^2 U2OS Sel PCR#1	TAG_BX_ATATGTCTTACA	118	G	G	A	75	52	19	G/A	0.6933	SNP
Lib10^4_#1 50_Jm^2 U2OS Sel PCR#1	TAG_BX_ATATTAGTGGGA	118	G	G	A	64	48	11	G/A	0.75	SNP
Lib10^4_#1 50_Jm^2 U2OS Sel PCR#1	TAG_BX_ATATTAGTGGGA	165	A	A	T	63	43	18	A/T	0.6825	SNP
Lib10^4_#1 50_Jm^2 U2OS Sel PCR#1	TAG_BX_ATCACTGTCTGA	130	C	CC	TT	83	56	15	CC/TT	0.6747	DNP
Lib10^4_#1 50_Jm^2 U2OS Sel PCR#1	TAG_BX_ATCACTGTCTGA	130	C	C	T	83	11	15	C/T	0.1325	SNP
Lib10^4_#1 50_Jm^2 U2OS Sel PCR#1	TAG_BX_ATCAGTAAAGGC	137	C	CC	AT	108	74	20	CC/AT	0.6852	DNP
Lib10^4_#1 50_Jm^2 U2OS Sel PCR#1	TAG_BX_ATCCGGCAATAT	5	G	G	A	36	30	6	G/A	0.8333	SNP
Lib10^4_#1 50_Jm^2 U2OS Sel PCR#1	TAG_BX_ATCCTATCCGAC	118	G	G	A	27	19	5	G/A	0.7037	SNP
Lib10^4_#1 50_Jm^2 U2OS Sel PCR#1	TAG_BX_ATCCTGAGTGAT	12	T	T	C	137	122	13	T/C	0.8905	SNP
Lib10^4_#1 50_Jm^2 U2OS Sel PCR#1	TAG_BX_ATCGGAAGCGTG	118	G	G	A	57	38	17	G/A	0.6667	SNP
Lib10^4_#1 50_Jm^2 U2OS Sel PCR#1	TAG_BX_ATCTCCTGCGAC	73	G	GAG	AAA	97	70	12	GAG/AAA	0.7216	Del-In
Lib10^4_#1 50_Jm^2 U2OS Sel PCR#1	TAG_BX_ATCTCCTGCGAC	73	G	G	A	97	13	12	G/A	0.134	SNP
Lib10^4_#1 50_Jm^2 U2OS Sel PCR#1	TAG_BX_ATCTCGTCCGGC	27	G	G	C	174	150	22	G/C	0.8621	SNP
Lib10^4_#1 50_Jm^2 U2OS Sel PCR#1	TAG_BX_ATCTCGTCCGGC	126	G	G	C	174	132	38	G/C	0.7586	SNP
Lib10^4_#1 50_Jm^2 U2OS Sel PCR#1	TAG_BX_ATCTCGTCCGGC	162	G	G	A	173	128	41	G/A	0.7399	SNP
Lib10^4_#1 50_Jm^2 U2OS Sel PCR#1	TAG_BX_ATGACAAGGAGA	70	C	CC	TT	42	32	7	CC/TT	0.7619	DNP
Lib10^4_#1 50_Jm^2 U2OS Sel PCR#1	TAG_BX_ATGACAGCTTAT	118	G	G	A	78	58	19	G/A	0.7436	SNP
Lib10^4_#1 50_Jm^2 U2OS Sel PCR#1	TAG_BX_ATGGAGGTATTC	71	C	CC	TT	446	356	58	CC/TT	0.7982	DNP
Lib10^4_#1 50_Jm^2 U2OS Sel PCR#1	TAG_BX_ATGGAGGTATTC	130	C	CC	TA	471	345	61	CC/TA	0.7325	DNP
Lib10^4_#1 50_Jm^2 U2OS Sel PCR#1	TAG_BX_ATGGAGGTATTC	130	C	C	T	471	53	61	C/T	0.1125	SNP
Lib10^4_#1 50_Jm^2 U2OS Sel PCR#1	TAG_BX_ATGGAGGTATTC	170	C	C	T	425	318	98	C/T	0.7482	SNP
Lib10^4_#1 50_Jm^2 U2OS Sel PCR#1	TAG_BX_ATGGGAAGTATG	96	T	T	C	70	52	13	T/C	0.7429	SNP
Lib10^4_#1 50_Jm^2 U2OS Sel PCR#1	TAG_BX_ATGTATGAACTT	121	G	G	A	175	129	44	G/A	0.7371	SNP
Lib10^4_#1 50_Jm^2 U2OS Sel PCR#1	TAG_BX_ATGTATGGTAAC	130	C	C	T	150	122	24	C/T	0.8133	SNP
Lib10^4_#1 50_Jm^2 U2OS Sel PCR#1	TAG_BX_ATGTATTAGGTA	131	C	C	T	573	432	128	C/T	0.7539	SNP
Lib10^4_#1 50_Jm^2 U2OS Sel PCR#1	TAG_BX_ATGTGAGATTAC	-37	G	G	T	23	23	0	G/T	1	SNP
Lib10^4_#1 50_Jm^2 U2OS Sel PCR#1	TAG_BX_ATGTGAGATTAC	27	G	G	A	23	17	5	G/A	0.7391	SNP
Lib10^4_#1 50_Jm^2 U2OS Sel PCR#1	TAG_BX_ATGTGAGATTAC	85	G	G	T	23	16	6	G/T	0.6957	SNP
Lib10^4_#1 50_Jm^2 U2OS Sel PCR#1	TAG_BX_ATGTTGTCGTGG	117	C	C	T	13	10	3	C/T	0.7692	SNP
Lib10^4_#1 50_Jm^2 U2OS Sel PCR#1	TAG_BX_ATTACACGTCAG	95	C	C	G	81	59	21	C/G	0.7284	SNP
Lib10^4_#1 50_Jm^2 U2OS Sel PCR#1	TAG_BX_ATTACACGTCAG	134	C	C	T	80	55	25	C/T	0.6875	SNP
Lib10^4_#1 50_Jm^2 U2OS Sel PCR#1	TAG_BX_ATTACACGTCAG	153	C	C	G	79	56	23	C/G	0.7089	SNP
Lib10^4_#1 50_Jm^2 U2OS Sel PCR#1	TAG_BX_ATTACATATAGT	130	C	CC	TT	610	398	114	CC/TT	0.6525	DNP
Lib10^4_#1 50_Jm^2 U2OS Sel PCR#1	TAG_BX_ATTACATATAGT	130	C	C	T	610	85	114	C/T	0.1393	SNP
Lib10^4_#1 50_Jm^2 U2OS Sel PCR#1	TAG_BX_ATTCTAGGCACG	118	G	G	A	75	56	16	G/A	0.7467	SNP
Lib10^4_#1 50_Jm^2 U2OS Sel PCR#1	TAG_BX_ATTCTATGAAGC	130	C	C	T	54	41	13	C/T	0.7593	SNP
Lib10^4_#1 50_Jm^2 U2OS Sel PCR#1	TAG_BX_ATTCTGGGTGTT	117	C	C	T	16	11	4	C/T	0.6875	SNP
Lib10^4_#1 50_Jm^2 U2OS Sel PCR#1	TAG_BX_ATTCTTTGCACG	117	C	C	T	92	74	16	C/T	0.8043	SNP
Lib10^4_#1 50_Jm^2 U2OS Sel PCR#1	TAG_BX_ATTGTTTCGTAT	118	G	G	A	42	34	6	G/A	0.8095	SNP
Lib10^4_#1 50_Jm^2 U2OS Sel PCR#1	TAG_BX_ATTTACGCCTCC	-29	C	CTCAACGTAACACTTTACAGCGGCGCGTCATTTGATATGATGCGCCCCGCTTCCCGATAAGGGAGCAGGCCAGTAAAAGCATTACCTGTGGTGGGGTTCCCGAGCGGCCAAAGGGAGCAGACTCTAAATCTGCCGTCATCGACTTCGAAGGTTCGAATCCTTCCCCCACCACCATCACTTTCAAAAGTCCGAAAAGATCCGGCGGCGCAG		4608	4395	159	CTCAACGTAACACTTTACAGCGGCGCGTCATTTGATATGATGCGCCCCGCTTCCCGATAAGGGAGCAGGCCAGTAAAAGCATTACCTGTGGTGGGGTTCCCGAGCGGCCAAAGGGAGCAGACTCTAAATCTGCCGTCATCGACTTCGAAGGTTCGAATCCTTCCCCCACCACCATCACTTTCAAAAGTCCGAAAAGATCCGGCGGCGCAG/	0.9538	Del
Lib10^4_#1 50_Jm^2 U2OS Sel PCR#1	TAG_BX_ATTTAGTGTCCA	53	T	T	C	23	17	5	T/C	0.7391	SNP
Lib10^4_#1 50_Jm^2 U2OS Sel PCR#1	TAG_BX_ATTTAGTGTCCA	117	C	C	T	23	18	5	C/T	0.7826	SNP
Lib10^4_#1 50_Jm^2 U2OS Sel PCR#1	TAG_BX_ATTTCTTTTAAA	130	C	C	T	53	37	13	C/T	0.6981	SNP
Lib10^4_#1 50_Jm^2 U2OS Sel PCR#1	TAG_BX_ATTTGAAGATGG	117	C	C	T	49	38	11	C/T	0.7755	SNP
Lib10^4_#1 50_Jm^2 U2OS Sel PCR#1	TAG_BX_ATTTTCTCTTTG	129	T	TC	AT	140	89	27	TC/AT	0.6357	DNP
Lib10^4_#1 50_Jm^2 U2OS Sel PCR#1	TAG_BX_ATTTTCTCTTTG	129	T	T	A	140	21	27	T/A	0.15	SNP
Lib10^4_#1 50_Jm^2 U2OS Sel PCR#1	TAG_BX_CAAAATGTCTTA	117	C	C	T	22	19	3	C/T	0.8636	SNP
Lib10^4_#1 50_Jm^2 U2OS Sel PCR#1	TAG_BX_CAAAGGGGGGTT	95	C	C	G	66	57	8	C/G	0.8636	SNP
Lib10^4_#1 50_Jm^2 U2OS Sel PCR#1	TAG_BX_CAAAGGGGGGTT	114	C	C	T	66	53	13	C/T	0.803	SNP
Lib10^4_#1 50_Jm^2 U2OS Sel PCR#1	TAG_BX_CAAAGGGGGGTT	125	C	C	G	66	54	12	C/G	0.8182	SNP
Lib10^4_#1 50_Jm^2 U2OS Sel PCR#1	TAG_BX_CAAAGGGGGGTT	170	C	C	A	65	49	16	C/A	0.7538	SNP
Lib10^4_#1 50_Jm^2 U2OS Sel PCR#1	TAG_BX_CAAAGGGGGGTT	187	C	C	T	65	46	19	C/T	0.7077	SNP
Lib10^4_#1 50_Jm^2 U2OS Sel PCR#1	TAG_BX_CAAAGGGGGGTT	193	C	C	T	65	45	20	C/T	0.6923	SNP
Lib10^4_#1 50_Jm^2 U2OS Sel PCR#1	TAG_BX_CAAGCATGCTTG	118	G	G	A	61	45	16	G/A	0.7377	SNP
Lib10^4_#1 50_Jm^2 U2OS Sel PCR#1	TAG_BX_CAAGTTAATTGG	65	G	G		131	107	19	G/	0.8168	1Del
Lib10^4_#1 50_Jm^2 U2OS Sel PCR#1	TAG_BX_CACTCGTGTCGC	5	G	G	A	18	16	2	G/A	0.8889	SNP
Lib10^4_#1 50_Jm^2 U2OS Sel PCR#1	TAG_BX_CACTTGCTTAAT	117	C	C	T	38	29	7	C/T	0.7632	SNP
Lib10^4_#1 50_Jm^2 U2OS Sel PCR#1	TAG_BX_CAGAACCGCTGA	117	C	C	T	74	53	19	C/T	0.7162	SNP
Lib10^4_#1 50_Jm^2 U2OS Sel PCR#1	TAG_BX_CAGAACCGCTGA	125	C	C	T	74	54	19	C/T	0.7297	SNP
Lib10^4_#1 50_Jm^2 U2OS Sel PCR#1	TAG_BX_CAGCTTCCTAGC	5	G	G	A	45	40	5	G/A	0.8889	SNP
Lib10^4_#1 50_Jm^2 U2OS Sel PCR#1	TAG_BX_CAGGACTTGCAT	118	G	G	A	254	207	41	G/A	0.815	SNP
Lib10^4_#1 50_Jm^2 U2OS Sel PCR#1	TAG_BX_CAGTATTTGGTT	121	G	G	C	62	48	12	G/C	0.7742	SNP
Lib10^4_#1 50_Jm^2 U2OS Sel PCR#1	TAG_BX_CAGTGTACTTTA	117	C	C	T	422	336	75	C/T	0.7962	SNP
Lib10^4_#1 50_Jm^2 U2OS Sel PCR#1	TAG_BX_CATCCGGGGGGC	118	G	G	A	1245	978	224	G/A	0.7855	SNP
Lib10^4_#1 50_Jm^2 U2OS Sel PCR#1	TAG_BX_CATCGTCGATGT	118	G	G	A	64	49	14	G/A	0.7656	SNP
Lib10^4_#1 50_Jm^2 U2OS Sel PCR#1	TAG_BX_CATCTCTTTGCG	99	A	A	G	80	60	16	A/G	0.75	SNP
Lib10^4_#1 50_Jm^2 U2OS Sel PCR#1	TAG_BX_CATCTGTCGCGT	130	C	C	T	79	63	14	C/T	0.7975	SNP
Lib10^4_#1 50_Jm^2 U2OS Sel PCR#1	TAG_BX_CATTCTTTAATC	130	C	C	G	86	63	21	C/G	0.7326	SNP
Lib10^4_#1 50_Jm^2 U2OS Sel PCR#1	TAG_BX_CATTGCGTTTAT	117	C	C	T	13	12	1	C/T	0.9231	SNP
Lib10^4_#1 50_Jm^2 U2OS Sel PCR#1	TAG_BX_CATTTCCAGGGT	-56	G	G	A	199	198	1	G/A	0.995	SNP
Lib10^4_#1 50_Jm^2 U2OS Sel PCR#1	TAG_BX_CATTTCCAGGGT	97	A	A	T	190	144	44	A/T	0.7579	SNP
Lib10^4_#1 50_Jm^2 U2OS Sel PCR#1	TAG_BX_CCAACCAATCGT	131	C	C	T	90	71	17	C/T	0.7889	SNP
Lib10^4_#1 50_Jm^2 U2OS Sel PCR#1	TAG_BX_CCAACGAAGTGG	5	G	G	A	84	78	5	G/A	0.9286	SNP
Lib10^4_#1 50_Jm^2 U2OS Sel PCR#1	TAG_BX_CCAACGAAGTGG	84	G	G	A	81	68	10	G/A	0.8395	SNP
Lib10^4_#1 50_Jm^2 U2OS Sel PCR#1	TAG_BX_CCATAGATTGGC	131	C	C	T	69	47	20	C/T	0.6812	SNP
Lib10^4_#1 50_Jm^2 U2OS Sel PCR#1	TAG_BX_CCATGGATAACC	118	G	G	A	43	31	11	G/A	0.7209	SNP
Lib10^4_#1 50_Jm^2 U2OS Sel PCR#1	TAG_BX_CCCATTCCTCTT	80	C	C	CA	333	257	66	C/CA	0.7718	Ins
Lib10^4_#1 50_Jm^2 U2OS Sel PCR#1	TAG_BX_CCCATTCCTCTT	87	A	A	G	333	260	65	A/G	0.7808	SNP
Lib10^4_#1 50_Jm^2 U2OS Sel PCR#1	TAG_BX_CCCCCTCCGTCC	85	G	G	A	86	60	17	G/A	0.6977	SNP
Lib10^4_#1 50_Jm^2 U2OS Sel PCR#1	TAG_BX_CCCGTGAAGCGA	5	G	G	A	22	19	3	G/A	0.8636	SNP
Lib10^4_#1 50_Jm^2 U2OS Sel PCR#1	TAG_BX_CCGATCGACTCA	118	G	G	A	72	54	17	G/A	0.75	SNP
Lib10^4_#1 50_Jm^2 U2OS Sel PCR#1	TAG_BX_CCGCAATAGGCA	130	C	C	G	85	60	22	C/G	0.7059	SNP
Lib10^4_#1 50_Jm^2 U2OS Sel PCR#1	TAG_BX_CCGCTCGGGTTT	121	G	G	A	98	68	27	G/A	0.6939	SNP
Lib10^4_#1 50_Jm^2 U2OS Sel PCR#1	TAG_BX_CCGGCAAGGGCG	130	C	C	T	179	126	48	C/T	0.7039	SNP
Lib10^4_#1 50_Jm^2 U2OS Sel PCR#1	TAG_BX_CCGTACGAGGGT	118	G	G	A	25	16	7	G/A	0.64	SNP
Lib10^4_#1 50_Jm^2 U2OS Sel PCR#1	TAG_BX_CCGTGCACTGGG	69	T	T	C	23	5	18	T/C	0.2174	SNP
Lib10^4_#1 50_Jm^2 U2OS Sel PCR#1	TAG_BX_CCGTGCACTGGG	118	G	G	A	23	19	4	G/A	0.8261	SNP
Lib10^4_#1 50_Jm^2 U2OS Sel PCR#1	TAG_BX_CCGTGCCCGGTA	125	C	C	T	97	75	21	C/T	0.7732	SNP
Lib10^4_#1 50_Jm^2 U2OS Sel PCR#1	TAG_BX_CCGTGCCCGGTA	131	C	C	T	97	72	21	C/T	0.7423	SNP
Lib10^4_#1 50_Jm^2 U2OS Sel PCR#1	TAG_BX_CCGTGCCCGGTA	135	C	C	T	97	69	23	C/T	0.7113	SNP
Lib10^4_#1 50_Jm^2 U2OS Sel PCR#1	TAG_BX_CCGTTGTATCTG	100	T	TC	GT	101	63	19	TC/GT	0.6238	DNP
Lib10^4_#1 50_Jm^2 U2OS Sel PCR#1	TAG_BX_CCTAATTGCTTT	118	G	G	A	272	206	61	G/A	0.7574	SNP
Lib10^4_#1 50_Jm^2 U2OS Sel PCR#1	TAG_BX_CCTATATTAGGG	27	G	G	A	17	16	1	G/A	0.9412	SNP
Lib10^4_#1 50_Jm^2 U2OS Sel PCR#1	TAG_BX_CCTATATTAGGG	118	G	G	A	17	15	2	G/A	0.8824	SNP
Lib10^4_#1 50_Jm^2 U2OS Sel PCR#1	TAG_BX_CCTATATTAGGG	126	G	G	A	17	14	3	G/A	0.8235	SNP
Lib10^4_#1 50_Jm^2 U2OS Sel PCR#1	TAG_BX_CCTCCTCGTGCT	70	C	CC	TT	116	85	18	CC/TT	0.7328	DNP
Lib10^4_#1 50_Jm^2 U2OS Sel PCR#1	TAG_BX_CCTTAGGTTGGT	121	G	G	A	81	63	15	G/A	0.7778	SNP
Lib10^4_#1 50_Jm^2 U2OS Sel PCR#1	TAG_BX_CCTTCCACATTT	117	C	C	T	37	32	3	C/T	0.8649	SNP
Lib10^4_#1 50_Jm^2 U2OS Sel PCR#1	TAG_BX_CCTTGCGGTGTT	130	C	C	T	105	80	21	C/T	0.7619	SNP
Lib10^4_#1 50_Jm^2 U2OS Sel PCR#1	TAG_BX_CCTTGGGTTTAC	131	C	C	T	79	65	13	C/T	0.8228	SNP
Lib10^4_#1 50_Jm^2 U2OS Sel PCR#1	TAG_BX_CCTTTCTACGGG	117	C	C	T	130	44	83	C/T	0.3385	SNP
Lib10^4_#1 50_Jm^2 U2OS Sel PCR#1	TAG_BX_CCTTTCTACGGG	121	G	G	A	130	58	71	G/A	0.4462	SNP
Lib10^4_#1 50_Jm^2 U2OS Sel PCR#1	TAG_BX_CCTTTTTTAGTG	121	G	G	A	14	8	5	G/A	0.5714	SNP
Lib10^4_#1 50_Jm^2 U2OS Sel PCR#1	TAG_BX_CGAATTACGTTT	131	C	C	T	103	82	17	C/T	0.7961	SNP
Lib10^4_#1 50_Jm^2 U2OS Sel PCR#1	TAG_BX_CGAATTATATGG	5	G	G	C	24	19	5	G/C	0.7917	SNP
Lib10^4_#1 50_Jm^2 U2OS Sel PCR#1	TAG_BX_CGAATTATATGG	69	T	T	C	23	4	19	T/C	0.1739	SNP
Lib10^4_#1 50_Jm^2 U2OS Sel PCR#1	TAG_BX_CGAGTGTCTATC	5	G	G	C	179	109	66	G/C	0.6089	SNP
Lib10^4_#1 50_Jm^2 U2OS Sel PCR#1	TAG_BX_CGAGTGTCTATC	84	G	G	A	177	94	79	G/A	0.5311	SNP
Lib10^4_#1 50_Jm^2 U2OS Sel PCR#1	TAG_BX_CGAGTGTCTATC	126	G	GA	AT	180	49	121	GA/AT	0.2722	DNP
Lib10^4_#1 50_Jm^2 U2OS Sel PCR#1	TAG_BX_CGATGCTGGTAT	85	G	G	A	93	75	15	G/A	0.8065	SNP
Lib10^4_#1 50_Jm^2 U2OS Sel PCR#1	TAG_BX_CGATGGCAATTA	118	G	G	A	38	30	8	G/A	0.7895	SNP
Lib10^4_#1 50_Jm^2 U2OS Sel PCR#1	TAG_BX_CGATGTTAGTGG	117	C	C	T	43	39	2	C/T	0.907	SNP
Lib10^4_#1 50_Jm^2 U2OS Sel PCR#1	TAG_BX_CGATTGAAGCAG	5	G	G	A	46	37	7	G/A	0.8043	SNP
Lib10^4_#1 50_Jm^2 U2OS Sel PCR#1	TAG_BX_CGCCTCGTTTCT	117	C	C	T	14	11	2	C/T	0.7857	SNP
Lib10^4_#1 50_Jm^2 U2OS Sel PCR#1	TAG_BX_CGCCTCTCGCTA	130	C	C	T	189	145	36	C/T	0.7672	SNP
Lib10^4_#1 50_Jm^2 U2OS Sel PCR#1	TAG_BX_CGCCTTTAAGTT	118	G	G	A	66	54	10	G/A	0.8182	SNP
Lib10^4_#1 50_Jm^2 U2OS Sel PCR#1	TAG_BX_CGCGCTGTTGGG	5	G	G	A	44	37	4	G/A	0.8409	SNP
Lib10^4_#1 50_Jm^2 U2OS Sel PCR#1	TAG_BX_CGCGGGCCGGTC	130	C	CC	TA	257	166	51	CC/TA	0.6459	DNP
Lib10^4_#1 50_Jm^2 U2OS Sel PCR#1	TAG_BX_CGCGGGCCGGTC	130	C	C	T	257	33	51	C/T	0.1284	SNP
Lib10^4_#1 50_Jm^2 U2OS Sel PCR#1	TAG_BX_CGGATGGTAGAC	-2	T	TCATTTGATATGATGCGCCCCGCTTCCCGATAAGGGAGCAGGCCAGTAAAAGCATTACCTGTG	CCCACAGGTAAT	81	9	63	TCATTTGATATGATGCGCCCCGCTTCCCGATAAGGGAGCAGGCCAGTAAAAGCATTACCTGTG/CCCACAGGTAAT	0.1111	Del-In
Lib10^4_#1 50_Jm^2 U2OS Sel PCR#1	TAG_BX_CGGATGGTAGAC	1	A	ATTTGATATGATGCGCCCCGCTTCCCGATAAGGGAGCAGGCCAGTAAAAGCATTACCTGTG	CACAGGTAAT	81	47	13	ATTTGATATGATGCGCCCCGCTTCCCGATAAGGGAGCAGGCCAGTAAAAGCATTACCTGTG/CACAGGTAAT	0.5802	Del-In
Lib10^4_#1 50_Jm^2 U2OS Sel PCR#1	TAG_BX_CGGTACAAGCAT	118	G	G	A	86	67	16	G/A	0.7791	SNP
Lib10^4_#1 50_Jm^2 U2OS Sel PCR#1	TAG_BX_CGGTAGGGGTTT	-39	C	C	A	404	397	6	C/A	0.9827	SNP
Lib10^4_#1 50_Jm^2 U2OS Sel PCR#1	TAG_BX_CGGTAGGGGTTT	117	C	C	A	398	319	66	C/A	0.8015	SNP
Lib10^4_#1 50_Jm^2 U2OS Sel PCR#1	TAG_BX_CGGTAGGGGTTT	125	C	C	T	398	316	75	C/T	0.794	SNP
Lib10^4_#1 50_Jm^2 U2OS Sel PCR#1	TAG_BX_CGGTGTGTGTCG	117	C	C	T	34	25	9	C/T	0.7353	SNP
Lib10^4_#1 50_Jm^2 U2OS Sel PCR#1	TAG_BX_CGGTTTTGTCGG	121	G	G	A	119	91	25	G/A	0.7647	SNP
Lib10^4_#1 50_Jm^2 U2OS Sel PCR#1	TAG_BX_CGTAAGTGTGCA	85	G	G	A	314	248	56	G/A	0.7898	SNP
Lib10^4_#1 50_Jm^2 U2OS Sel PCR#1	TAG_BX_CGTATGGCTCCT	117	C	C	T	18	14	4	C/T	0.7778	SNP
Lib10^4_#1 50_Jm^2 U2OS Sel PCR#1	TAG_BX_CGTCAGTTCTAC	130	C	C	T	82	60	20	C/T	0.7317	SNP
Lib10^4_#1 50_Jm^2 U2OS Sel PCR#1	TAG_BX_CGTCCAGAGTTA	-27	C	C	G	80	78	1	C/G	0.975	SNP
Lib10^4_#1 50_Jm^2 U2OS Sel PCR#1	TAG_BX_CGTCCAGAGTTA	71	C	C	T	79	58	16	C/T	0.7342	SNP
Lib10^4_#1 50_Jm^2 U2OS Sel PCR#1	TAG_BX_CGTCCAGAGTTA	95	C	C	G	79	61	15	C/G	0.7722	SNP
Lib10^4_#1 50_Jm^2 U2OS Sel PCR#1	TAG_BX_CGTCCAGAGTTA	111	C	C	A	79	61	16	C/A	0.7722	SNP
Lib10^4_#1 50_Jm^2 U2OS Sel PCR#1	TAG_BX_CGTCGAGCGATG	91	G	G	A	81	71	8	G/A	0.8765	SNP
Lib10^4_#1 50_Jm^2 U2OS Sel PCR#1	TAG_BX_CGTCGAGCGATG	112	G	G	T	81	71	9	G/T	0.8765	SNP
Lib10^4_#1 50_Jm^2 U2OS Sel PCR#1	TAG_BX_CGTCGATTGCTT	95	C	C	G	1069	879	162	C/G	0.8223	SNP
Lib10^4_#1 50_Jm^2 U2OS Sel PCR#1	TAG_BX_CGTCGATTGCTT	134	C	C	T	1068	823	222	C/T	0.7706	SNP
Lib10^4_#1 50_Jm^2 U2OS Sel PCR#1	TAG_BX_CGTCTATGGCCC	97	A	A	TT	34	22	8	A/TT	0.6471	Ins
Lib10^4_#1 50_Jm^2 U2OS Sel PCR#1	TAG_BX_CGTGGGAAGGTT	118	G	G	A	56	49	7	G/A	0.875	SNP
Lib10^4_#1 50_Jm^2 U2OS Sel PCR#1	TAG_BX_CGTGGGGCTGAA	12	T	T	C	113	100	10	T/C	0.885	SNP
Lib10^4_#1 50_Jm^2 U2OS Sel PCR#1	TAG_BX_CGTGTGTCGATT	130	C	C	T	361	282	71	C/T	0.7812	SNP
Lib10^4_#1 50_Jm^2 U2OS Sel PCR#1	TAG_BX_CGTGTGTCGATT	134	C	CCC		361	69	74	CCC/	0.1911	Del
Lib10^4_#1 50_Jm^2 U2OS Sel PCR#1	TAG_BX_CGTGTGTCGATT	135	C	CCC		361	203	74	CCC/	0.5623	Del
Lib10^4_#1 50_Jm^2 U2OS Sel PCR#1	TAG_BX_CGTTAGGTCGAT	5	G	G	C	737	689	38	G/C	0.9349	SNP
Lib10^4_#1 50_Jm^2 U2OS Sel PCR#1	TAG_BX_CGTTGCATTGTT	101	C	C	A	41	34	7	C/A	0.8293	SNP
Lib10^4_#1 50_Jm^2 U2OS Sel PCR#1	TAG_BX_CGTTGCATTGTT	147	C	C	T	41	32	8	C/T	0.7805	SNP
Lib10^4_#1 50_Jm^2 U2OS Sel PCR#1	TAG_BX_CGTTGTATAGAT	69	T	T	C	36	5	31	T/C	0.1389	SNP
Lib10^4_#1 50_Jm^2 U2OS Sel PCR#1	TAG_BX_CGTTGTATAGAT	118	G	G	A	36	30	5	G/A	0.8333	SNP
Lib10^4_#1 50_Jm^2 U2OS Sel PCR#1	TAG_BX_CGTTGTCGTCCG	117	C	C	T	43	33	9	C/T	0.7674	SNP
Lib10^4_#1 50_Jm^2 U2OS Sel PCR#1	TAG_BX_CGTTGTTTTCCT	5	G	G	C	43	42	1	G/C	0.9767	SNP
Lib10^4_#1 50_Jm^2 U2OS Sel PCR#1	TAG_BX_CGTTGTTTTCCT	32	G	G	A	41	37	4	G/A	0.9024	SNP
Lib10^4_#1 50_Jm^2 U2OS Sel PCR#1	TAG_BX_CGTTTTGTTCTT	118	G	G	A	218	171	42	G/A	0.7844	SNP
Lib10^4_#1 50_Jm^2 U2OS Sel PCR#1	TAG_BX_CGTTTTTGGTTA	121	G	G	T	79	60	18	G/T	0.7595	SNP
Lib10^4_#1 50_Jm^2 U2OS Sel PCR#1	TAG_BX_CGTTTTTGGTTA	181	G	G	C	79	54	25	G/C	0.6835	SNP
Lib10^4_#1 50_Jm^2 U2OS Sel PCR#1	TAG_BX_CGTTTTTTACCT	-29	C	CTC	TT	135	122	0	CTC/TT	0.9037	Del-In
Lib10^4_#1 50_Jm^2 U2OS Sel PCR#1	TAG_BX_CGTTTTTTACCT	24	C	C	T	134	114	19	C/T	0.8507	SNP
Lib10^4_#1 50_Jm^2 U2OS Sel PCR#1	TAG_BX_CGTTTTTTACCT	101	C	C	T	133	106	25	C/T	0.797	SNP
Lib10^4_#1 50_Jm^2 U2OS Sel PCR#1	TAG_BX_CGTTTTTTACCT	108	C	C	T	133	102	28	C/T	0.7669	SNP
Lib10^4_#1 50_Jm^2 U2OS Sel PCR#1	TAG_BX_CGTTTTTTACCT	117	C	C	T	133	105	26	C/T	0.7895	SNP
Lib10^4_#1 50_Jm^2 U2OS Sel PCR#1	TAG_BX_CGTTTTTTACCT	153	C	C	G	133	100	31	C/G	0.7519	SNP
Lib10^4_#1 50_Jm^2 U2OS Sel PCR#1	TAG_BX_CTACCCTTATAG	118	G	G	A	181	145	25	G/A	0.8011	SNP
Lib10^4_#1 50_Jm^2 U2OS Sel PCR#1	TAG_BX_CTACTCCTGCTT	126	G	G	T	71	48	22	G/T	0.6761	SNP
Lib10^4_#1 50_Jm^2 U2OS Sel PCR#1	TAG_BX_CTAGACTTCATT	118	G	G	A	63	45	17	G/A	0.7143	SNP
Lib10^4_#1 50_Jm^2 U2OS Sel PCR#1	TAG_BX_CTAGCGCGGTGT	122	G	GT	AA	89	62	14	GT/AA	0.6966	DNP
Lib10^4_#1 50_Jm^2 U2OS Sel PCR#1	TAG_BX_CTATTGTTAGCG	132	T	T		64	48	15	T/	0.75	1Del
Lib10^4_#1 50_Jm^2 U2OS Sel PCR#1	TAG_BX_CTCAGAGTCCAT	55	A	ACCTGTGGTGGGGTTCCCGAGCGGCCAAAGGGAGCAGACTCTAAATCTGCCGTCATCGACTTCGAAGGTTCGAATCCTTCCCCCACCACCATCACTTTCAAAAGTCCGAAAAGATCCG		591	511	61	ACCTGTGGTGGGGTTCCCGAGCGGCCAAAGGGAGCAGACTCTAAATCTGCCGTCATCGACTTCGAAGGTTCGAATCCTTCCCCCACCACCATCACTTTCAAAAGTCCGAAAAGATCCG/	0.8646	Del
Lib10^4_#1 50_Jm^2 U2OS Sel PCR#1	TAG_BX_CTCCGCCGTCTT	117	C	C	T	53	35	13	C/T	0.6604	SNP
Lib10^4_#1 50_Jm^2 U2OS Sel PCR#1	TAG_BX_CTCCGTTGGTGG	130	C	C	T	88	57	25	C/T	0.6477	SNP
Lib10^4_#1 50_Jm^2 U2OS Sel PCR#1	TAG_BX_CTCGATGTTTAC	121	G	G	A	44	34	10	G/A	0.7727	SNP
Lib10^4_#1 50_Jm^2 U2OS Sel PCR#1	TAG_BX_CTCGGAATAATA	130	C	C	T	75	52	19	C/T	0.6933	SNP
Lib10^4_#1 50_Jm^2 U2OS Sel PCR#1	TAG_BX_CTCGGGGTTCTG	5	G	G	A	29	27	2	G/A	0.931	SNP
Lib10^4_#1 50_Jm^2 U2OS Sel PCR#1	TAG_BX_CTCGGGGTTCTG	69	T	T	C	28	3	25	T/C	0.1071	SNP
Lib10^4_#1 50_Jm^2 U2OS Sel PCR#1	TAG_BX_CTCGTCTATTCA	130	C	CC	AT	106	68	21	CC/AT	0.6415	DNP
Lib10^4_#1 50_Jm^2 U2OS Sel PCR#1	TAG_BX_CTCGTCTATTCA	130	C	C	A	106	13	21	C/A	0.1226	SNP
Lib10^4_#1 50_Jm^2 U2OS Sel PCR#1	TAG_BX_CTCGTCTATTCA	187	C	C	T	91	64	27	C/T	0.7033	SNP
Lib10^4_#1 50_Jm^2 U2OS Sel PCR#1	TAG_BX_CTCTAGGTTCCA	130	C	C	T	44	31	11	C/T	0.7045	SNP
Lib10^4_#1 50_Jm^2 U2OS Sel PCR#1	TAG_BX_CTCTCGGGGATG	117	C	C	T	14	12	2	C/T	0.8571	SNP
Lib10^4_#1 50_Jm^2 U2OS Sel PCR#1	TAG_BX_CTCTCTCTTAAG	117	C	C	T	13	10	3	C/T	0.7692	SNP
Lib10^4_#1 50_Jm^2 U2OS Sel PCR#1	TAG_BX_CTCTCTGATTTG	117	C	C	T	35	27	8	C/T	0.7714	SNP
Lib10^4_#1 50_Jm^2 U2OS Sel PCR#1	TAG_BX_CTCTTGACTTTC	118	G	G	A	489	367	98	G/A	0.7505	SNP
Lib10^4_#1 50_Jm^2 U2OS Sel PCR#1	TAG_BX_CTGCATTGCTCC	131	C	C	T	140	111	24	C/T	0.7929	SNP
Lib10^4_#1 50_Jm^2 U2OS Sel PCR#1	TAG_BX_CTGCTAATGAAT	134	C	C	A	73	58	12	C/A	0.7945	SNP
Lib10^4_#1 50_Jm^2 U2OS Sel PCR#1	TAG_BX_CTGCTTCTGGTC	116	T	TC	GG	172	136	26	TC/GG	0.7907	DNP
Lib10^4_#1 50_Jm^2 U2OS Sel PCR#1	TAG_BX_CTGCTTCTGGTC	137	C	CC	TT	210	131	36	CC/TT	0.6238	DNP
Lib10^4_#1 50_Jm^2 U2OS Sel PCR#1	TAG_BX_CTGTTCTGTTCT	118	G	G	A	66	49	13	G/A	0.7424	SNP
Lib10^4_#1 50_Jm^2 U2OS Sel PCR#1	TAG_BX_CTTAGAGGCCCC	131	C	C	A	70	53	16	C/A	0.7571	SNP
Lib10^4_#1 50_Jm^2 U2OS Sel PCR#1	TAG_BX_CTTATATGGGGT	106	G	G	T	73	59	12	G/T	0.8082	SNP
Lib10^4_#1 50_Jm^2 U2OS Sel PCR#1	TAG_BX_CTTATATGGGGT	117	C	C	T	73	58	13	C/T	0.7945	SNP
Lib10^4_#1 50_Jm^2 U2OS Sel PCR#1	TAG_BX_CTTCATATCTCA	117	C	C	T	14	9	5	C/T	0.6429	SNP
Lib10^4_#1 50_Jm^2 U2OS Sel PCR#1	TAG_BX_CTTCATATCTCA	118	G	G	A	14	2	12	G/A	0.1429	SNP
Lib10^4_#1 50_Jm^2 U2OS Sel PCR#1	TAG_BX_CTTCCTGTCGGA	85	G	G	A	94	79	13	G/A	0.8404	SNP
Lib10^4_#1 50_Jm^2 U2OS Sel PCR#1	TAG_BX_CTTCTGTCCAGT	118	G	G	A	53	39	11	G/A	0.7358	SNP
Lib10^4_#1 50_Jm^2 U2OS Sel PCR#1	TAG_BX_CTTCTTACTCCG	95	C	C	A	57	44	11	C/A	0.7719	SNP
Lib10^4_#1 50_Jm^2 U2OS Sel PCR#1	TAG_BX_CTTGCCCCCCTT	118	G	G	A	58	43	13	G/A	0.7414	SNP
Lib10^4_#1 50_Jm^2 U2OS Sel PCR#1	TAG_BX_CTTGCGACACAC	118	G	G	A	213	161	40	G/A	0.7559	SNP
Lib10^4_#1 50_Jm^2 U2OS Sel PCR#1	TAG_BX_CTTGGCGGGGGT	118	G	G	A	55	47	8	G/A	0.8545	SNP
Lib10^4_#1 50_Jm^2 U2OS Sel PCR#1	TAG_BX_CTTGGGCTGGGA	111	C	C	T	302	236	59	C/T	0.7815	SNP
Lib10^4_#1 50_Jm^2 U2OS Sel PCR#1	TAG_BX_CTTGGGCTGGGA	117	C	C	A	302	236	55	C/A	0.7815	SNP
Lib10^4_#1 50_Jm^2 U2OS Sel PCR#1	TAG_BX_CTTGGGCTGGGA	134	C	C	T	302	224	67	C/T	0.7417	SNP
Lib10^4_#1 50_Jm^2 U2OS Sel PCR#1	TAG_BX_CTTGGGCTGGGA	147	C	C	G	301	222	74	C/G	0.7375	SNP
Lib10^4_#1 50_Jm^2 U2OS Sel PCR#1	TAG_BX_CTTGTTTGCGCC	85	G	G	A	53	45	7	G/A	0.8491	SNP
Lib10^4_#1 50_Jm^2 U2OS Sel PCR#1	TAG_BX_CTTTAACAGCAC	5	G	G	A	27	25	2	G/A	0.9259	SNP
Lib10^4_#1 50_Jm^2 U2OS Sel PCR#1	TAG_BX_CTTTAGAGGTTC	109	A	ATCGACTTCGAAGGTTCG		109	78	20	ATCGACTTCGAAGGTTCG/	0.7156	Del
Lib10^4_#1 50_Jm^2 U2OS Sel PCR#1	TAG_BX_CTTTCGCCTCGC	117	C	C	T	28	19	8	C/T	0.6786	SNP
Lib10^4_#1 50_Jm^2 U2OS Sel PCR#1	TAG_BX_CTTTCTATTTCA	5	G	G	C	35	33	2	G/C	0.9429	SNP
Lib10^4_#1 50_Jm^2 U2OS Sel PCR#1	TAG_BX_CTTTTATTATAT	130	C	C	T	72	55	15	C/T	0.7639	SNP
Lib10^4_#1 50_Jm^2 U2OS Sel PCR#1	TAG_BX_CTTTTTTACGTT	73	G	GAG	TAA	504	351	69	GAG/TAA	0.6964	Del-In
Lib10^4_#1 50_Jm^2 U2OS Sel PCR#1	TAG_BX_CTTTTTTACGTT	73	G	G	T	504	63	69	G/T	0.125	SNP
Lib10^4_#1 50_Jm^2 U2OS Sel PCR#1	TAG_BX_GAAAGTAAGACC	-56	G	G	A	66	65	1	G/A	0.9848	SNP
Lib10^4_#1 50_Jm^2 U2OS Sel PCR#1	TAG_BX_GAAAGTAAGACC	118	G	G	A	63	46	14	G/A	0.7302	SNP
Lib10^4_#1 50_Jm^2 U2OS Sel PCR#1	TAG_BX_GAACGGACCACT	130	C	C	T	50	38	10	C/T	0.76	SNP
Lib10^4_#1 50_Jm^2 U2OS Sel PCR#1	TAG_BX_GAAGCTCGTTAT	5	G	G	A	50	47	1	G/A	0.94	SNP
Lib10^4_#1 50_Jm^2 U2OS Sel PCR#1	TAG_BX_GAAGGCTAGGCA	91	G	GAC	AAA	14	4	6	GAC/AAA	0.2857	Del-In
Lib10^4_#1 50_Jm^2 U2OS Sel PCR#1	TAG_BX_GAAGGCTAGGCA	91	G	G	A	14	4	6	G/A	0.2857	SNP
Lib10^4_#1 50_Jm^2 U2OS Sel PCR#1	TAG_BX_GACTCGTCATTT	5	G	G	A	53	6	46	G/A	0.1132	SNP
Lib10^4_#1 50_Jm^2 U2OS Sel PCR#1	TAG_BX_GACTCGTCATTT	131	C	C	A	52	33	16	C/A	0.6346	SNP
Lib10^4_#1 50_Jm^2 U2OS Sel PCR#1	TAG_BX_GAGAAAAACGTA	85	G	GG	AT	421	321	64	GG/AT	0.7625	DNP
Lib10^4_#1 50_Jm^2 U2OS Sel PCR#1	TAG_BX_GAGAAGTCTTCA	130	C	C	T	220	154	56	C/T	0.7	SNP
Lib10^4_#1 50_Jm^2 U2OS Sel PCR#1	TAG_BX_GAGATTGTTCTT	-17	C	CT	TC	147	131	6	CT/TC	0.8912	DNP
Lib10^4_#1 50_Jm^2 U2OS Sel PCR#1	TAG_BX_GAGGTAGTATAG	118	G	G	A	60	51	5	G/A	0.85	SNP
Lib10^4_#1 50_Jm^2 U2OS Sel PCR#1	TAG_BX_GAGGTTTCTATT	5	G	G	A	47	42	5	G/A	0.8936	SNP
Lib10^4_#1 50_Jm^2 U2OS Sel PCR#1	TAG_BX_GAGTGCCCCCTC	95	C	C	A	135	108	22	C/A	0.8	SNP
Lib10^4_#1 50_Jm^2 U2OS Sel PCR#1	TAG_BX_GATACTAGGGTA	85	G	GG	TA	33	19	14	GG/TA	0.5758	DNP
Lib10^4_#1 50_Jm^2 U2OS Sel PCR#1	TAG_BX_GATAGTGTTCCC	118	G	G	A	51	40	10	G/A	0.7843	SNP
Lib10^4_#1 50_Jm^2 U2OS Sel PCR#1	TAG_BX_GATCAGGTGCTT	130	C	C	T	70	47	20	C/T	0.6714	SNP
Lib10^4_#1 50_Jm^2 U2OS Sel PCR#1	TAG_BX_GATGATGTTCTG	125	C	C	T	78	64	11	C/T	0.8205	SNP
Lib10^4_#1 50_Jm^2 U2OS Sel PCR#1	TAG_BX_GATGATGTTCTG	134	C	C	T	78	61	15	C/T	0.7821	SNP
Lib10^4_#1 50_Jm^2 U2OS Sel PCR#1	TAG_BX_GATGCCAGTGTG	120	A	AG	TA	70	49	10	AG/TA	0.7	DNP
Lib10^4_#1 50_Jm^2 U2OS Sel PCR#1	TAG_BX_GATGCCAGTGTG	120	A	A	T	70	9	10	A/T	0.1286	SNP
Lib10^4_#1 50_Jm^2 U2OS Sel PCR#1	TAG_BX_GATTGCGGGGTT	118	G	G	A	127	100	23	G/A	0.7874	SNP
Lib10^4_#1 50_Jm^2 U2OS Sel PCR#1	TAG_BX_GATTGGTATGTG	61	G	GG	AA	75	54	15	GG/AA	0.72	DNP
Lib10^4_#1 50_Jm^2 U2OS Sel PCR#1	TAG_BX_GATTGGTATGTG	82	A	A	G	72	56	16	A/G	0.7778	SNP
Lib10^4_#1 50_Jm^2 U2OS Sel PCR#1	TAG_BX_GATTGGTTCTCT	121	G	G	A	193	148	41	G/A	0.7668	SNP
Lib10^4_#1 50_Jm^2 U2OS Sel PCR#1	TAG_BX_GATTTGTCTAGC	118	G	G	A	126	98	22	G/A	0.7778	SNP
Lib10^4_#1 50_Jm^2 U2OS Sel PCR#1	TAG_BX_GATTTTGTATCC	130	C	CC	TT	69	36	17	CC/TT	0.5217	DNP
Lib10^4_#1 50_Jm^2 U2OS Sel PCR#1	TAG_BX_GATTTTGTATCC	130	C	C	T	69	14	17	C/T	0.2029	SNP
Lib10^4_#1 50_Jm^2 U2OS Sel PCR#1	TAG_BX_GCACGTTTTGGA	121	G	G	A	129	101	26	G/A	0.7829	SNP
Lib10^4_#1 50_Jm^2 U2OS Sel PCR#1	TAG_BX_GCCCATTCTACT	101	C	C	T	126	107	18	C/T	0.8492	SNP
Lib10^4_#1 50_Jm^2 U2OS Sel PCR#1	TAG_BX_GCCCATTCTACT	111	C	C	T	126	106	19	C/T	0.8413	SNP
Lib10^4_#1 50_Jm^2 U2OS Sel PCR#1	TAG_BX_GCCCATTCTACT	117	C	C	T	126	106	18	C/T	0.8413	SNP
Lib10^4_#1 50_Jm^2 U2OS Sel PCR#1	TAG_BX_GCCCATTCTACT	135	C	CCC	TCT	126	48	22	CCC/TCT	0.381	Del-In
Lib10^4_#1 50_Jm^2 U2OS Sel PCR#1	TAG_BX_GCCCATTCTACT	161	C	C	T	126	99	25	C/T	0.7857	SNP
Lib10^4_#1 50_Jm^2 U2OS Sel PCR#1	TAG_BX_GCCCCATTCTGT	45	T	TAAAAGCATTACCTGTGGTGGGGTTCCCGAGCGGCCAAAGGGAGCAGACTCTAAATCTGCCGTCATCGACTTCGAAGGTTCGAA		50	40	9	TAAAAGCATTACCTGTGGTGGGGTTCCCGAGCGGCCAAAGGGAGCAGACTCTAAATCTGCCGTCATCGACTTCGAAGGTTCGAA/	0.8	Del
Lib10^4_#1 50_Jm^2 U2OS Sel PCR#1	TAG_BX_GCCGGATAACGT	118	G	GAAG	AAAA	103	67	15	GAAG/AAAA	0.6505	Del-In
Lib10^4_#1 50_Jm^2 U2OS Sel PCR#1	TAG_BX_GCCGGATAACGT	118	G	G	A	103	20	15	G/A	0.1942	SNP
Lib10^4_#1 50_Jm^2 U2OS Sel PCR#1	TAG_BX_GCCTTATTGGGT	133	T	TCC	CTT	90	48	15	TCC/CTT	0.5333	Del-In
Lib10^4_#1 50_Jm^2 U2OS Sel PCR#1	TAG_BX_GCCTTATTGGGT	133	T	TC	CT	90	12	15	TC/CT	0.1333	DNP
Lib10^4_#1 50_Jm^2 U2OS Sel PCR#1	TAG_BX_GCCTTATTGGGT	133	T	T	C	90	12	15	T/C	0.1333	SNP
Lib10^4_#1 50_Jm^2 U2OS Sel PCR#1	TAG_BX_GCGAATGGGTGG	101	C	C	A	140	113	23	C/A	0.8071	SNP
Lib10^4_#1 50_Jm^2 U2OS Sel PCR#1	TAG_BX_GCGATGTATCGG	117	C	C	A	213	173	35	C/A	0.8122	SNP
Lib10^4_#1 50_Jm^2 U2OS Sel PCR#1	TAG_BX_GCGCATTAATTG	118	G	GA	AT	57	37	7	GA/AT	0.6491	DNP
Lib10^4_#1 50_Jm^2 U2OS Sel PCR#1	TAG_BX_GCGCATTAATTG	118	G	G	A	57	12	7	G/A	0.2105	SNP
Lib10^4_#1 50_Jm^2 U2OS Sel PCR#1	TAG_BX_GCGCCTAGAGCG	-65	A	A		37	37	0	A/	1	1Del
Lib10^4_#1 50_Jm^2 U2OS Sel PCR#1	TAG_BX_GCGCCTAGAGCG	69	T	T	C	37	4	32	T/C	0.1081	SNP
Lib10^4_#1 50_Jm^2 U2OS Sel PCR#1	TAG_BX_GCGCCTAGAGCG	128	A	AT	GA	48	28	9	AT/GA	0.5833	DNP
Lib10^4_#1 50_Jm^2 U2OS Sel PCR#1	TAG_BX_GCGCCTAGAGCG	128	A	A	G	48	10	9	A/G	0.2083	SNP
Lib10^4_#1 50_Jm^2 U2OS Sel PCR#1	TAG_BX_GCGCGAGTGTTA	118	G	G	A	56	42	12	G/A	0.75	SNP
Lib10^4_#1 50_Jm^2 U2OS Sel PCR#1	TAG_BX_GCGGTGGGTTCG	130	C	C	T	99	69	29	C/T	0.697	SNP
Lib10^4_#1 50_Jm^2 U2OS Sel PCR#1	TAG_BX_GCGTATGGAGCG	91	G	G	A	12	11	1	G/A	0.9167	SNP
Lib10^4_#1 50_Jm^2 U2OS Sel PCR#1	TAG_BX_GCGTTGGTTAGG	5	G	G	C	27	23	4	G/C	0.8519	SNP
Lib10^4_#1 50_Jm^2 U2OS Sel PCR#1	TAG_BX_GCGTTTGATTCG	115	T	TTC	CTT	244	148	37	TTC/CTT	0.6066	Del-In
Lib10^4_#1 50_Jm^2 U2OS Sel PCR#1	TAG_BX_GCGTTTGATTCG	115	T	T	C	244	53	37	T/C	0.2172	SNP
Lib10^4_#1 50_Jm^2 U2OS Sel PCR#1	TAG_BX_GCTCATCGCGTC	118	G	G	A	70	60	10	G/A	0.8571	SNP
Lib10^4_#1 50_Jm^2 U2OS Sel PCR#1	TAG_BX_GCTCATCGCGTC	187	C	C	A	70	52	18	C/A	0.7429	SNP
Lib10^4_#1 50_Jm^2 U2OS Sel PCR#1	TAG_BX_GCTCTATCCGCT	117	C	C	T	20	18	2	C/T	0.9	SNP
Lib10^4_#1 50_Jm^2 U2OS Sel PCR#1	TAG_BX_GCTCTGATGTAC	118	G	G	A	58	43	11	G/A	0.7414	SNP
Lib10^4_#1 50_Jm^2 U2OS Sel PCR#1	TAG_BX_GCTGTCGGCCTA	118	G	G	A	94	69	21	G/A	0.734	SNP
Lib10^4_#1 50_Jm^2 U2OS Sel PCR#1	TAG_BX_GCTTAGGTTGAC	27	G	G	A	424	374	37	G/A	0.8821	SNP
Lib10^4_#1 50_Jm^2 U2OS Sel PCR#1	TAG_BX_GCTTAGGTTGAC	73	G	GAG	AAA	456	346	46	GAG/AAA	0.7588	Del-In
Lib10^4_#1 50_Jm^2 U2OS Sel PCR#1	TAG_BX_GCTTCTCTTGTC	117	C	C	T	12	8	4	C/T	0.6667	SNP
Lib10^4_#1 50_Jm^2 U2OS Sel PCR#1	TAG_BX_GCTTGTGATAAC	131	C	C	T	74	56	17	C/T	0.7568	SNP
Lib10^4_#1 50_Jm^2 U2OS Sel PCR#1	TAG_BX_GCTTTGGGCCGT	117	C	C	T	16	15	1	C/T	0.9375	SNP
Lib10^4_#1 50_Jm^2 U2OS Sel PCR#1	TAG_BX_GGAAGTAGTTAG	96	T	T	C	23	19	3	T/C	0.8261	SNP
Lib10^4_#1 50_Jm^2 U2OS Sel PCR#1	TAG_BX_GGCATGGGTGTG	117	C	C	A	211	162	42	C/A	0.7678	SNP
Lib10^4_#1 50_Jm^2 U2OS Sel PCR#1	TAG_BX_GGCATGGGTGTG	147	C	C	G	210	155	50	C/G	0.7381	SNP
Lib10^4_#1 50_Jm^2 U2OS Sel PCR#1	TAG_BX_GGCCCACATCAG	-16	T	T		93	89	4	T/	0.957	1Del
Lib10^4_#1 50_Jm^2 U2OS Sel PCR#1	TAG_BX_GGCCCGGCGTTC	118	G	GAA	AAG	71	49	11	GAA/AAG	0.6901	Del-In
Lib10^4_#1 50_Jm^2 U2OS Sel PCR#1	TAG_BX_GGCCCGGCGTTC	118	G	G	A	71	8	11	G/A	0.1127	SNP
Lib10^4_#1 50_Jm^2 U2OS Sel PCR#1	TAG_BX_GGCCCTAATTAT	-3	G	G	A	71	65	6	G/A	0.9155	SNP
Lib10^4_#1 50_Jm^2 U2OS Sel PCR#1	TAG_BX_GGCCCTAATTAT	3	T	TTGATATGATGCGCC		71	64	7	TTGATATGATGCGCC/	0.9014	Del
Lib10^4_#1 50_Jm^2 U2OS Sel PCR#1	TAG_BX_GGCGAGAGAAAG	118	G	G	A	94	78	11	G/A	0.8298	SNP
Lib10^4_#1 50_Jm^2 U2OS Sel PCR#1	TAG_BX_GGCGCATATGGA	119	A	AAG	GCA	24	18	4	AAG/GCA	0.75	Del-In
Lib10^4_#1 50_Jm^2 U2OS Sel PCR#1	TAG_BX_GGCGGCAGTCTT	118	G	G	A	79	57	17	G/A	0.7215	SNP
Lib10^4_#1 50_Jm^2 U2OS Sel PCR#1	TAG_BX_GGCTCGTATATT	97	A	A	G	21	18	3	A/G	0.8571	SNP
Lib10^4_#1 50_Jm^2 U2OS Sel PCR#1	TAG_BX_GGCTGCTTATGT	89	C	C	A	22	21	1	C/A	0.9545	SNP
Lib10^4_#1 50_Jm^2 U2OS Sel PCR#1	TAG_BX_GGCTGGAAGGGG	130	C	C	T	48	36	10	C/T	0.75	SNP
Lib10^4_#1 50_Jm^2 U2OS Sel PCR#1	TAG_BX_GGCTTCGCGTGT	118	G	G	A	42	36	3	G/A	0.8571	SNP
Lib10^4_#1 50_Jm^2 U2OS Sel PCR#1	TAG_BX_GGCTTGTGGGTT	69	T	T	C	34	5	28	T/C	0.1471	SNP
Lib10^4_#1 50_Jm^2 U2OS Sel PCR#1	TAG_BX_GGCTTGTGGGTT	118	G	G	C	34	24	6	G/C	0.7059	SNP
Lib10^4_#1 50_Jm^2 U2OS Sel PCR#1	TAG_BX_GGCTTGTGGGTT	162	G	G	C	34	21	12	G/C	0.6176	SNP
Lib10^4_#1 50_Jm^2 U2OS Sel PCR#1	TAG_BX_GGGACGCAGATT	118	G	G	A	76	57	18	G/A	0.75	SNP
Lib10^4_#1 50_Jm^2 U2OS Sel PCR#1	TAG_BX_GGGAGGAAGCGC	130	C	CC	TT	86	52	14	CC/TT	0.6047	DNP
Lib10^4_#1 50_Jm^2 U2OS Sel PCR#1	TAG_BX_GGGAGGAAGCGC	130	C	C	T	86	17	14	C/T	0.1977	SNP
Lib10^4_#1 50_Jm^2 U2OS Sel PCR#1	TAG_BX_GGGAGGAATTTT	130	C	CCTTC	TTTTT	72	37	16	CCTTC/TTTTT	0.5139	Del-In
Lib10^4_#1 50_Jm^2 U2OS Sel PCR#1	TAG_BX_GGGAGGAATTTT	130	C	CC	TT	72	8	16	CC/TT	0.1111	DNP
Lib10^4_#1 50_Jm^2 U2OS Sel PCR#1	TAG_BX_GGGAGGAATTTT	130	C	C	T	72	10	16	C/T	0.1389	SNP
Lib10^4_#1 50_Jm^2 U2OS Sel PCR#1	TAG_BX_GGGCCCTCCGGG	96	T	T	G	108	91	16	T/G	0.8426	SNP
Lib10^4_#1 50_Jm^2 U2OS Sel PCR#1	TAG_BX_GGGCTCATTGCA	81	A	A	T	74	64	8	A/T	0.8649	SNP
Lib10^4_#1 50_Jm^2 U2OS Sel PCR#1	TAG_BX_GGGCTCATTGCA	85	G	G	A	74	64	8	G/A	0.8649	SNP
Lib10^4_#1 50_Jm^2 U2OS Sel PCR#1	TAG_BX_GGGGATTAAATC	31	A	A	AG	24	20	3	A/AG	0.8333	Ins
Lib10^4_#1 50_Jm^2 U2OS Sel PCR#1	TAG_BX_GGGGATTAAATC	91	G	G	C	24	20	4	G/C	0.8333	SNP
Lib10^4_#1 50_Jm^2 U2OS Sel PCR#1	TAG_BX_GGGGATTAAATC	118	G	G	A	24	3	20	G/A	0.125	SNP
Lib10^4_#1 50_Jm^2 U2OS Sel PCR#1	TAG_BX_GGGGATTAAATC	121	G	GG	AA	28	18	5	GG/AA	0.6429	DNP
Lib10^4_#1 50_Jm^2 U2OS Sel PCR#1	TAG_BX_GGGGCTGCATGT	118	G	G	A	113	90	22	G/A	0.7965	SNP
Lib10^4_#1 50_Jm^2 U2OS Sel PCR#1	TAG_BX_GGGGGGTCCAGG	69	T	T	C	117	12	102	T/C	0.1026	SNP
Lib10^4_#1 50_Jm^2 U2OS Sel PCR#1	TAG_BX_GGGGGGTCCAGG	130	C	C	T	117	90	23	C/T	0.7692	SNP
Lib10^4_#1 50_Jm^2 U2OS Sel PCR#1	TAG_BX_GGGGTTATCCCT	5	G	G	A	29	26	2	G/A	0.8966	SNP
Lib10^4_#1 50_Jm^2 U2OS Sel PCR#1	TAG_BX_GGGGTTATTTGG	118	G	G	A	346	257	72	G/A	0.7428	SNP
Lib10^4_#1 50_Jm^2 U2OS Sel PCR#1	TAG_BX_GGGTAGAGGATC	5	G	G	C	49	47	2	G/C	0.9592	SNP
Lib10^4_#1 50_Jm^2 U2OS Sel PCR#1	TAG_BX_GGGTCTGGGTGT	118	G	G	A	48	40	7	G/A	0.8333	SNP
Lib10^4_#1 50_Jm^2 U2OS Sel PCR#1	TAG_BX_GGTACTTGGTTG	101	C	C	A	54	35	18	C/A	0.6481	SNP
Lib10^4_#1 50_Jm^2 U2OS Sel PCR#1	TAG_BX_GGTACTTGGTTG	130	C	C	T	54	6	48	C/T	0.1111	SNP
Lib10^4_#1 50_Jm^2 U2OS Sel PCR#1	TAG_BX_GGTATGAGTTTG	130	C	C	T	73	51	18	C/T	0.6986	SNP
Lib10^4_#1 50_Jm^2 U2OS Sel PCR#1	TAG_BX_GGTATGCCTGTG	5	G	G	T	123	47	74	G/T	0.3821	SNP
Lib10^4_#1 50_Jm^2 U2OS Sel PCR#1	TAG_BX_GGTATGCCTGTG	77	G	G	A	122	44	75	G/A	0.3607	SNP
Lib10^4_#1 50_Jm^2 U2OS Sel PCR#1	TAG_BX_GGTATGCCTGTG	118	G	G	A	122	62	56	G/A	0.5082	SNP
Lib10^4_#1 50_Jm^2 U2OS Sel PCR#1	TAG_BX_GGTCACGCCGTG	-38	G	GGATCCTTTCTCAACGTAACACTTTACAGCGGCGCGTCATTTGATATGATGCGCCCCGCTTCCCGATAAGGGAGCAGGCCAGTAAAAGCATTACCTGTGGTGGGGTTCCCGAGCGGCCAAAGGGAGCAGACTCTAAATCTGCCGTCATCGACTTCGAAGGTTCGAATCCTTCCCCCACCACCATCACTTTCAAAAGTCCGAAAAGATCCGGCGGCGCAG	AAGATCCTTT	28	4	13	GGATCCTTTCTCAACGTAACACTTTACAGCGGCGCGTCATTTGATATGATGCGCCCCGCTTCCCGATAAGGGAGCAGGCCAGTAAAAGCATTACCTGTGGTGGGGTTCCCGAGCGGCCAAAGGGAGCAGACTCTAAATCTGCCGTCATCGACTTCGAAGGTTCGAATCCTTCCCCCACCACCATCACTTTCAAAAGTCCGAAAAGATCCGGCGGCGCAG/AAGATCCTTT	0.1429	Del-In
Lib10^4_#1 50_Jm^2 U2OS Sel PCR#1	TAG_BX_GGTCACGCCGTG	-38	G	GGATCCTTTCTCAACGTAACACTTTACAGCGGCGCGTCATTTGATATGATGCGCCCCGCTTCCCGATAAGGGAGCAGGCCAGTAAAAGCATTACCTGTGGTGGGGTTCCCGAGCGGCCAAAGGGAGCAGACTCTAAATCTGCCGTCATCGACTTCGAAGGTTCGAATCCTTCCCCCACCACCATCACTTTCAAAAGTCCGAA		28	11	13	GGATCCTTTCTCAACGTAACACTTTACAGCGGCGCGTCATTTGATATGATGCGCCCCGCTTCCCGATAAGGGAGCAGGCCAGTAAAAGCATTACCTGTGGTGGGGTTCCCGAGCGGCCAAAGGGAGCAGACTCTAAATCTGCCGTCATCGACTTCGAAGGTTCGAATCCTTCCCCCACCACCATCACTTTCAAAAGTCCGAA/	0.3929	Del
Lib10^4_#1 50_Jm^2 U2OS Sel PCR#1	TAG_BX_GGTCACGCCGTG	-29	C	CTCAACGTAACACTTTACAGCGGCGCGTCATTTGATATGATGCGCCCCGCTTCCCGATAAGGGAGCAGGCCAGTAAAAGCATTACCTGTGGTGGGGTTCCCGAGCGGCCAAAGGGAGCAGACTCTAAATCTGCCGTCATCGACTTCGAAGGTTCGAATCCTTCCCCCACCACCATCACTTTCAAAAGTCCGAAAAGATCCGGCGGCGCAG		28	9	4	CTCAACGTAACACTTTACAGCGGCGCGTCATTTGATATGATGCGCCCCGCTTCCCGATAAGGGAGCAGGCCAGTAAAAGCATTACCTGTGGTGGGGTTCCCGAGCGGCCAAAGGGAGCAGACTCTAAATCTGCCGTCATCGACTTCGAAGGTTCGAATCCTTCCCCCACCACCATCACTTTCAAAAGTCCGAAAAGATCCGGCGGCGCAG/	0.3214	Del
Lib10^4_#1 50_Jm^2 U2OS Sel PCR#1	TAG_BX_GGTCGCCGCTTT	134	C	C	A	44	32	11	C/A	0.7273	SNP
Lib10^4_#1 50_Jm^2 U2OS Sel PCR#1	TAG_BX_GGTGCTAATGAT	130	C	C	T	99	70	27	C/T	0.7071	SNP
Lib10^4_#1 50_Jm^2 U2OS Sel PCR#1	TAG_BX_GGTGGGTATTAA	118	G	G	A	67	51	14	G/A	0.7612	SNP
Lib10^4_#1 50_Jm^2 U2OS Sel PCR#1	TAG_BX_GGTGGTTCTGGC	130	C	C	T	80	66	11	C/T	0.825	SNP
Lib10^4_#1 50_Jm^2 U2OS Sel PCR#1	TAG_BX_GGTTAAAGATAG	120	A	AG	GA	46	32	9	AG/GA	0.6957	DNP
Lib10^4_#1 50_Jm^2 U2OS Sel PCR#1	TAG_BX_GGTTAAAGATAG	120	A	A	G	46	5	9	A/G	0.1087	SNP
Lib10^4_#1 50_Jm^2 U2OS Sel PCR#1	TAG_BX_GGTTGGGTCCTA	130	C	C	T	32	22	9	C/T	0.6875	SNP
Lib10^4_#1 50_Jm^2 U2OS Sel PCR#1	TAG_BX_GGTTTATGGCAA	117	C	C	T	19	13	6	C/T	0.6842	SNP
Lib10^4_#1 50_Jm^2 U2OS Sel PCR#1	TAG_BX_GGTTTCGATAAT	117	C	C	A	67	50	15	C/A	0.7463	SNP
Lib10^4_#1 50_Jm^2 U2OS Sel PCR#1	TAG_BX_GGTTTCGTCAGT	118	G	G	A	112	89	19	G/A	0.7946	SNP
Lib10^4_#1 50_Jm^2 U2OS Sel PCR#1	TAG_BX_GGTTTGGTTAGT	95	C	C	G	99	80	17	C/G	0.8081	SNP
Lib10^4_#1 50_Jm^2 U2OS Sel PCR#1	TAG_BX_GGTTTTCCTTTT	140	C	CC	AT	248	193	39	CC/AT	0.7782	DNP
Lib10^4_#1 50_Jm^2 U2OS Sel PCR#1	TAG_BX_GGTTTTGTTCCC	131	C	C	T	84	67	14	C/T	0.7976	SNP
Lib10^4_#1 50_Jm^2 U2OS Sel PCR#1	TAG_BX_GTAACGCCTCAC	5	G	G	A	24	19	3	G/A	0.7917	SNP
Lib10^4_#1 50_Jm^2 U2OS Sel PCR#1	TAG_BX_GTACATGTATCT	135	C	CC	AT	52	35	11	CC/AT	0.6731	DNP
Lib10^4_#1 50_Jm^2 U2OS Sel PCR#1	TAG_BX_GTACATGTATCT	135	C	C	A	52	6	11	C/A	0.1154	SNP
Lib10^4_#1 50_Jm^2 U2OS Sel PCR#1	TAG_BX_GTACCTCTGAGG	130	C	C	T	71	55	13	C/T	0.7746	SNP
Lib10^4_#1 50_Jm^2 U2OS Sel PCR#1	TAG_BX_GTACTGATCGAT	97	A	A	G	97	40	54	A/G	0.4124	SNP
Lib10^4_#1 50_Jm^2 U2OS Sel PCR#1	TAG_BX_GTACTGATCGAT	131	C	C	T	97	36	58	C/T	0.3711	SNP
Lib10^4_#1 50_Jm^2 U2OS Sel PCR#1	TAG_BX_GTAGTTTACACG	117	C	C	T	83	69	12	C/T	0.8313	SNP
Lib10^4_#1 50_Jm^2 U2OS Sel PCR#1	TAG_BX_GTATAATGTCTT	103	G	G	C	33	23	9	G/C	0.697	SNP
Lib10^4_#1 50_Jm^2 U2OS Sel PCR#1	TAG_BX_GTATATCCTTAT	-15	T	T	C	84	74	9	T/C	0.881	SNP
Lib10^4_#1 50_Jm^2 U2OS Sel PCR#1	TAG_BX_GTATATCCTTAT	130	C	C	A	83	60	18	C/A	0.7229	SNP
Lib10^4_#1 50_Jm^2 U2OS Sel PCR#1	TAG_BX_GTATTTACCGGT	117	C	C	T	21	14	7	C/T	0.6667	SNP
Lib10^4_#1 50_Jm^2 U2OS Sel PCR#1	TAG_BX_GTATTTACCGGT	118	G	G	A	21	3	18	G/A	0.1429	SNP
Lib10^4_#1 50_Jm^2 U2OS Sel PCR#1	TAG_BX_GTATTTGTAGAC	5	G	G	C	68	57	10	G/C	0.8382	SNP
Lib10^4_#1 50_Jm^2 U2OS Sel PCR#1	TAG_BX_GTATTTGTAGAC	67	G	GTTC	AAT	66	40	15	GTTC/AAT	0.6061	Del-In
Lib10^4_#1 50_Jm^2 U2OS Sel PCR#1	TAG_BX_GTATTTGTAGAC	70	C	C		21	3	15	C/	0.1429	1Del
Lib10^4_#1 50_Jm^2 U2OS Sel PCR#1	TAG_BX_GTATTTGTAGAC	74	A	A	G	66	51	13	A/G	0.7727	SNP
Lib10^4_#1 50_Jm^2 U2OS Sel PCR#1	TAG_BX_GTCACTCGCGCT	117	C	C	T	17	12	5	C/T	0.7059	SNP
Lib10^4_#1 50_Jm^2 U2OS Sel PCR#1	TAG_BX_GTCCTAACTTAT	117	C	C	T	111	90	18	C/T	0.8108	SNP
Lib10^4_#1 50_Jm^2 U2OS Sel PCR#1	TAG_BX_GTCCTAACTTAT	137	C	C	T	111	84	26	C/T	0.7568	SNP
Lib10^4_#1 50_Jm^2 U2OS Sel PCR#1	TAG_BX_GTCCTCCCCCCA	-29	C	C	T	153	148	3	C/T	0.9673	SNP
Lib10^4_#1 50_Jm^2 U2OS Sel PCR#1	TAG_BX_GTCCTCCCCCCA	132	T	TTC	ATA	183	113	33	TTC/ATA	0.6175	Del-In
Lib10^4_#1 50_Jm^2 U2OS Sel PCR#1	TAG_BX_GTCCTCCCCCCA	132	T	T	A	183	35	33	T/A	0.1913	SNP
Lib10^4_#1 50_Jm^2 U2OS Sel PCR#1	TAG_BX_GTCGCTATAGAA	95	C	C	G	66	52	11	C/G	0.7879	SNP
Lib10^4_#1 50_Jm^2 U2OS Sel PCR#1	TAG_BX_GTCGTCTGTTTA	121	G	G	A	43	33	9	G/A	0.7674	SNP
Lib10^4_#1 50_Jm^2 U2OS Sel PCR#1	TAG_BX_GTCTGATTTCGC	117	C	C	T	16	12	4	C/T	0.75	SNP
Lib10^4_#1 50_Jm^2 U2OS Sel PCR#1	TAG_BX_GTCTGGTAGAAG	118	G	G	A	57	42	11	G/A	0.7368	SNP
Lib10^4_#1 50_Jm^2 U2OS Sel PCR#1	TAG_BX_GTGAGATGCACG	118	G	G	A	42	35	6	G/A	0.8333	SNP
Lib10^4_#1 50_Jm^2 U2OS Sel PCR#1	TAG_BX_GTGATTTGTTTT	130	C	C	T	202	154	46	C/T	0.7624	SNP
Lib10^4_#1 50_Jm^2 U2OS Sel PCR#1	TAG_BX_GTGCACTTCCGG	64	G	G		34	31	3	G/	0.9118	1Del
Lib10^4_#1 50_Jm^2 U2OS Sel PCR#1	TAG_BX_GTGCCAACGCTG	76	C	CG	AA	34	29	3	CG/AA	0.8529	DNP
Lib10^4_#1 50_Jm^2 U2OS Sel PCR#1	TAG_BX_GTGCTCCCTGTG	70	C	C	A	7	2	4	C/A	0.2857	SNP
Lib10^4_#1 50_Jm^2 U2OS Sel PCR#1	TAG_BX_GTGCTCCCTGTG	70	C	C		30	23	4	C/	0.7667	1Del
Lib10^4_#1 50_Jm^2 U2OS Sel PCR#1	TAG_BX_GTGGATTTTTTT	118	G	G	A	42	37	5	G/A	0.881	SNP
Lib10^4_#1 50_Jm^2 U2OS Sel PCR#1	TAG_BX_GTGGCGACCTGT	121	G	GG	AA	60	40	7	GG/AA	0.6667	DNP
Lib10^4_#1 50_Jm^2 U2OS Sel PCR#1	TAG_BX_GTGGTATAGCGC	5	G	G	C	185	171	10	G/C	0.9243	SNP
Lib10^4_#1 50_Jm^2 U2OS Sel PCR#1	TAG_BX_GTGGTATAGCGC	167	G	G	T	179	132	45	G/T	0.7374	SNP
Lib10^4_#1 50_Jm^2 U2OS Sel PCR#1	TAG_BX_GTGGTCGCGGCA	118	G	G	A	36	32	3	G/A	0.8889	SNP
Lib10^4_#1 50_Jm^2 U2OS Sel PCR#1	TAG_BX_GTGTCCCGTCGG	95	C	C	G	624	487	110	C/G	0.7804	SNP
Lib10^4_#1 50_Jm^2 U2OS Sel PCR#1	TAG_BX_GTGTCTCTGCCA	118	G	G	A	76	65	9	G/A	0.8553	SNP
Lib10^4_#1 50_Jm^2 U2OS Sel PCR#1	TAG_BX_GTGTCTTATTAT	69	T	T	C	15	2	13	T/C	0.1333	SNP
Lib10^4_#1 50_Jm^2 U2OS Sel PCR#1	TAG_BX_GTGTCTTATTAT	117	C	C	T	15	10	5	C/T	0.6667	SNP
Lib10^4_#1 50_Jm^2 U2OS Sel PCR#1	TAG_BX_GTGTCTTATTAT	118	G	G	A	15	2	13	G/A	0.1333	SNP
Lib10^4_#1 50_Jm^2 U2OS Sel PCR#1	TAG_BX_GTTAACTCGTTT	134	C	CCC	TTT	94	55	16	CCC/TTT	0.5851	Del-In
Lib10^4_#1 50_Jm^2 U2OS Sel PCR#1	TAG_BX_GTTAACTCGTTT	134	C	CC	TT	94	16	16	CC/TT	0.1702	DNP
Lib10^4_#1 50_Jm^2 U2OS Sel PCR#1	TAG_BX_GTTATTCACATA	-34	C	C	T	22	22	0	C/T	1	SNP
Lib10^4_#1 50_Jm^2 U2OS Sel PCR#1	TAG_BX_GTTATTCACATA	130	C	C	G	21	15	6	C/G	0.7143	SNP
Lib10^4_#1 50_Jm^2 U2OS Sel PCR#1	TAG_BX_GTTCCATATGTT	118	G	G	A	105	86	14	G/A	0.819	SNP
Lib10^4_#1 50_Jm^2 U2OS Sel PCR#1	TAG_BX_GTTCTCGTGTAT	118	G	G	A	71	50	18	G/A	0.7042	SNP
Lib10^4_#1 50_Jm^2 U2OS Sel PCR#1	TAG_BX_GTTCTTCTTGAG	-5	G	GCGTCATTTGATATGATGCGCCCCGCTTCCCGATAAGGGAGCAGGCCAGTAAAAGCATTACCTGTGGTGGGGTTCCCGAGCGGCCAAAGGGAGCAGACTCTAAATCTGCCGTCATCGACTTCGAAGGTTCGAA		1151	1085	30	GCGTCATTTGATATGATGCGCCCCGCTTCCCGATAAGGGAGCAGGCCAGTAAAAGCATTACCTGTGGTGGGGTTCCCGAGCGGCCAAAGGGAGCAGACTCTAAATCTGCCGTCATCGACTTCGAAGGTTCGAA/	0.9427	Del
Lib10^4_#1 50_Jm^2 U2OS Sel PCR#1	TAG_BX_GTTGAGGGGAAG	85	G	G	T	70	55	15	G/T	0.7857	SNP
Lib10^4_#1 50_Jm^2 U2OS Sel PCR#1	TAG_BX_GTTGCGTCCCGA	131	C	C	T	114	20	93	C/T	0.1754	SNP
Lib10^4_#1 50_Jm^2 U2OS Sel PCR#1	TAG_BX_GTTGCGTCCCGA	132	T	TTC	ATT	141	67	45	TTC/ATT	0.4752	Del-In
Lib10^4_#1 50_Jm^2 U2OS Sel PCR#1	TAG_BX_GTTGCGTCCCGA	132	T	T	A	141	27	45	T/A	0.1915	SNP
Lib10^4_#1 50_Jm^2 U2OS Sel PCR#1	TAG_BX_GTTGGGTGTAGA	118	G	G	A	74	54	16	G/A	0.7297	SNP
Lib10^4_#1 50_Jm^2 U2OS Sel PCR#1	TAG_BX_GTTGTGGTTTGT	130	C	C	T	57	46	9	C/T	0.807	SNP
Lib10^4_#1 50_Jm^2 U2OS Sel PCR#1	TAG_BX_GTTTCCTGTTGG	130	C	C	T	65	50	13	C/T	0.7692	SNP
Lib10^4_#1 50_Jm^2 U2OS Sel PCR#1	TAG_BX_GTTTTCGGTAAT	118	G	G	A	53	42	8	G/A	0.7925	SNP
Lib10^4_#1 50_Jm^2 U2OS Sel PCR#1	TAG_BX_TAAAGAAGCGCC	85	G	G	A	59	50	7	G/A	0.8475	SNP
Lib10^4_#1 50_Jm^2 U2OS Sel PCR#1	TAG_BX_TAAATTAGCTAG	73	G	GAG	AAA	230	157	35	GAG/AAA	0.6826	Del-In
Lib10^4_#1 50_Jm^2 U2OS Sel PCR#1	TAG_BX_TAAATTAGCTAG	73	G	G	A	230	28	35	G/A	0.1217	SNP
Lib10^4_#1 50_Jm^2 U2OS Sel PCR#1	TAG_BX_TAACCGGGCGCT	67	G	G	C	38	23	15	G/C	0.6053	SNP
Lib10^4_#1 50_Jm^2 U2OS Sel PCR#1	TAG_BX_TAACTTGATCAT	95	C	C	T	61	47	12	C/T	0.7705	SNP
Lib10^4_#1 50_Jm^2 U2OS Sel PCR#1	TAG_BX_TAACTTGATCAT	101	C	C	A	61	47	13	C/A	0.7705	SNP
Lib10^4_#1 50_Jm^2 U2OS Sel PCR#1	TAG_BX_TAACTTGATCAT	111	C	C	A	61	45	14	C/A	0.7377	SNP
Lib10^4_#1 50_Jm^2 U2OS Sel PCR#1	TAG_BX_TAACTTGATCAT	130	C	C	T	61	44	15	C/T	0.7213	SNP
Lib10^4_#1 50_Jm^2 U2OS Sel PCR#1	TAG_BX_TAATGTCACCTT	118	G	G	A	835	672	136	G/A	0.8048	SNP
Lib10^4_#1 50_Jm^2 U2OS Sel PCR#1	TAG_BX_TACCCGAGAGTC	72	C	C	T	147	118	23	C/T	0.8027	SNP
Lib10^4_#1 50_Jm^2 U2OS Sel PCR#1	TAG_BX_TACCCGAGAGTC	125	C	C	T	147	112	32	C/T	0.7619	SNP
Lib10^4_#1 50_Jm^2 U2OS Sel PCR#1	TAG_BX_TACCCGAGAGTC	144	C	C	A	147	110	35	C/A	0.7483	SNP
Lib10^4_#1 50_Jm^2 U2OS Sel PCR#1	TAG_BX_TACCCGAGAGTC	160	C	C	T	147	106	38	C/T	0.7211	SNP
Lib10^4_#1 50_Jm^2 U2OS Sel PCR#1	TAG_BX_TACCCTCCTAGA	61	G	GG	AT	167	137	16	GG/AT	0.8204	DNP
Lib10^4_#1 50_Jm^2 U2OS Sel PCR#1	TAG_BX_TACGGGTTCTTT	130	C	C	T	274	205	59	C/T	0.7482	SNP
Lib10^4_#1 50_Jm^2 U2OS Sel PCR#1	TAG_BX_TACGGTTATAGG	131	C	C	T	189	154	29	C/T	0.8148	SNP
Lib10^4_#1 50_Jm^2 U2OS Sel PCR#1	TAG_BX_TACTCGGTTAGC	130	C	C	T	70	47	21	C/T	0.6714	SNP
Lib10^4_#1 50_Jm^2 U2OS Sel PCR#1	TAG_BX_TACTGGTATTAT	130	C	C	T	68	54	12	C/T	0.7941	SNP
Lib10^4_#1 50_Jm^2 U2OS Sel PCR#1	TAG_BX_TACTGTTGCTTG	118	G	G	A	46	36	9	G/A	0.7826	SNP
Lib10^4_#1 50_Jm^2 U2OS Sel PCR#1	TAG_BX_TACTTGCGACGG	117	C	C	T	13	10	3	C/T	0.7692	SNP
Lib10^4_#1 50_Jm^2 U2OS Sel PCR#1	TAG_BX_TAGCCGTGGGCG	117	C	C	T	43	34	7	C/T	0.7907	SNP
Lib10^4_#1 50_Jm^2 U2OS Sel PCR#1	TAG_BX_TAGCTTGTCGAT	118	G	G	A	72	57	14	G/A	0.7917	SNP
Lib10^4_#1 50_Jm^2 U2OS Sel PCR#1	TAG_BX_TAGGCTATTTAA	130	C	C	T	41	34	5	C/T	0.8293	SNP
Lib10^4_#1 50_Jm^2 U2OS Sel PCR#1	TAG_BX_TAGGTGAGAAGG	127	A	AAT	TAA	66	38	11	AAT/TAA	0.5758	Del-In
Lib10^4_#1 50_Jm^2 U2OS Sel PCR#1	TAG_BX_TAGGTGAGAAGG	127	A	A	T	66	14	11	A/T	0.2121	SNP
Lib10^4_#1 50_Jm^2 U2OS Sel PCR#1	TAG_BX_TAGTAAGATCTT	118	G	G	A	207	166	36	G/A	0.8019	SNP
Lib10^4_#1 50_Jm^2 U2OS Sel PCR#1	TAG_BX_TAGTAGATTTTC	5	G	GAT	TAA	199	162	11	GAT/TAA	0.8141	Del-In
Lib10^4_#1 50_Jm^2 U2OS Sel PCR#1	TAG_BX_TAGTAGATTTTC	5	G	G	T	199	25	11	G/T	0.1256	SNP
Lib10^4_#1 50_Jm^2 U2OS Sel PCR#1	TAG_BX_TAGTCCTTTTTC	5	G	G	A	14	14	0	G/A	1	SNP
Lib10^4_#1 50_Jm^2 U2OS Sel PCR#1	TAG_BX_TAGTTAAGAGCT	134	C	C	A	38	29	9	C/A	0.7632	SNP
Lib10^4_#1 50_Jm^2 U2OS Sel PCR#1	TAG_BX_TATAAGGACAGC	5	G	G	A	33	30	3	G/A	0.9091	SNP
Lib10^4_#1 50_Jm^2 U2OS Sel PCR#1	TAG_BX_TATCTCACCATG	118	G	G	A	48	39	8	G/A	0.8125	SNP
Lib10^4_#1 50_Jm^2 U2OS Sel PCR#1	TAG_BX_TATCTTGGTCTC	5	G	G	A	83	71	12	G/A	0.8554	SNP
Lib10^4_#1 50_Jm^2 U2OS Sel PCR#1	TAG_BX_TATGCTCTTTCC	121	G	G	A	37	27	10	G/A	0.7297	SNP
Lib10^4_#1 50_Jm^2 U2OS Sel PCR#1	TAG_BX_TATGGAACAAAT	130	C	C	T	68	49	17	C/T	0.7206	SNP
Lib10^4_#1 50_Jm^2 U2OS Sel PCR#1	TAG_BX_TATGGGGAAGCT	118	G	G	A	57	43	10	G/A	0.7544	SNP
Lib10^4_#1 50_Jm^2 U2OS Sel PCR#1	TAG_BX_TATGGGTCAGTT	130	C	C	T	65	49	16	C/T	0.7538	SNP
Lib10^4_#1 50_Jm^2 U2OS Sel PCR#1	TAG_BX_TATGTTAAGAGG	134	C	C	A	115	71	42	C/A	0.6174	SNP
Lib10^4_#1 50_Jm^2 U2OS Sel PCR#1	TAG_BX_TATTCAACACTC	130	C	C	T	128	95	28	C/T	0.7422	SNP
Lib10^4_#1 50_Jm^2 U2OS Sel PCR#1	TAG_BX_TATTCCATTTAT	130	C	C	G	99	73	19	C/G	0.7374	SNP
Lib10^4_#1 50_Jm^2 U2OS Sel PCR#1	TAG_BX_TATTGGGACTTC	131	C	C	T	131	98	29	C/T	0.7481	SNP
Lib10^4_#1 50_Jm^2 U2OS Sel PCR#1	TAG_BX_TATTGTGGTTAG	95	C	C	G	149	108	38	C/G	0.7248	SNP
Lib10^4_#1 50_Jm^2 U2OS Sel PCR#1	TAG_BX_TATTTAAGTTGG	117	C	C	T	17	15	2	C/T	0.8824	SNP
Lib10^4_#1 50_Jm^2 U2OS Sel PCR#1	TAG_BX_TCAATAACAGAT	47	A	A	G	53	44	7	A/G	0.8302	SNP
Lib10^4_#1 50_Jm^2 U2OS Sel PCR#1	TAG_BX_TCAATAACAGAT	64	G	GG	AA	53	45	6	GG/AA	0.8491	DNP
Lib10^4_#1 50_Jm^2 U2OS Sel PCR#1	TAG_BX_TCACCCAGGACC	5	G	G	A	72	69	2	G/A	0.9583	SNP
Lib10^4_#1 50_Jm^2 U2OS Sel PCR#1	TAG_BX_TCACGTTTCGGG	5	G	G	C	37	34	2	G/C	0.9189	SNP
Lib10^4_#1 50_Jm^2 U2OS Sel PCR#1	TAG_BX_TCAGTGAATACG	118	G	G	A	215	160	44	G/A	0.7442	SNP
Lib10^4_#1 50_Jm^2 U2OS Sel PCR#1	TAG_BX_TCCACATGACGG	118	G	G	A	119	89	25	G/A	0.7479	SNP
Lib10^4_#1 50_Jm^2 U2OS Sel PCR#1	TAG_BX_TCCCTGTTGGCC	121	G	G	A	203	151	51	G/A	0.7438	SNP
Lib10^4_#1 50_Jm^2 U2OS Sel PCR#1	TAG_BX_TCCGCGTCTGGT	131	C	C	T	80	63	14	C/T	0.7875	SNP
Lib10^4_#1 50_Jm^2 U2OS Sel PCR#1	TAG_BX_TCCGTCTCAGGT	130	C	C	T	72	56	14	C/T	0.7778	SNP
Lib10^4_#1 50_Jm^2 U2OS Sel PCR#1	TAG_BX_TCCTGCTGTAAG	85	G	G	T	214	165	38	G/T	0.771	SNP
Lib10^4_#1 50_Jm^2 U2OS Sel PCR#1	TAG_BX_TCCTTGCAGCCT	118	G	G	A	127	96	25	G/A	0.7559	SNP
Lib10^4_#1 50_Jm^2 U2OS Sel PCR#1	TAG_BX_TCGCGTCAAGTT	118	G	G	A	86	70	12	G/A	0.814	SNP
Lib10^4_#1 50_Jm^2 U2OS Sel PCR#1	TAG_BX_TCGGTCCTTGTT	5	G	G	A	28	23	5	G/A	0.8214	SNP
Lib10^4_#1 50_Jm^2 U2OS Sel PCR#1	TAG_BX_TCGGTCCTTGTT	53	T	T	A	26	19	7	T/A	0.7308	SNP
Lib10^4_#1 50_Jm^2 U2OS Sel PCR#1	TAG_BX_TCGGTCTAGTGT	98	A	A	T	20	17	3	A/T	0.85	SNP
Lib10^4_#1 50_Jm^2 U2OS Sel PCR#1	TAG_BX_TCGTCTTTAGGT	102	T	T	C	108	84	23	T/C	0.7778	SNP
Lib10^4_#1 50_Jm^2 U2OS Sel PCR#1	TAG_BX_TCGTCTTTAGGT	117	C	C	T	108	83	22	C/T	0.7685	SNP
Lib10^4_#1 50_Jm^2 U2OS Sel PCR#1	TAG_BX_TCGTGAGCGTTG	118	G	G	A	19	12	7	G/A	0.6316	SNP
Lib10^4_#1 50_Jm^2 U2OS Sel PCR#1	TAG_BX_TCGTTGTGCCGA	82	A	A	G	83	70	12	A/G	0.8434	SNP
Lib10^4_#1 50_Jm^2 U2OS Sel PCR#1	TAG_BX_TCTAACTTTTTC	85	G	G	A	67	52	14	G/A	0.7761	SNP
Lib10^4_#1 50_Jm^2 U2OS Sel PCR#1	TAG_BX_TCTACTATTGTA	117	C	C	T	62	47	10	C/T	0.7581	SNP
Lib10^4_#1 50_Jm^2 U2OS Sel PCR#1	TAG_BX_TCTATTCACGTC	86	G	G	C	102	79	19	G/C	0.7745	SNP
Lib10^4_#1 50_Jm^2 U2OS Sel PCR#1	TAG_BX_TCTCCTTTCAAA	5	G	G	A	33	33	0	G/A	1	SNP
Lib10^4_#1 50_Jm^2 U2OS Sel PCR#1	TAG_BX_TCTCGAGCTTGC	130	C	C	T	87	64	21	C/T	0.7356	SNP
Lib10^4_#1 50_Jm^2 U2OS Sel PCR#1	TAG_BX_TCTCTGGATATT	118	G	G	A	63	52	11	G/A	0.8254	SNP
Lib10^4_#1 50_Jm^2 U2OS Sel PCR#1	TAG_BX_TCTGTCGTGAGT	112	G	GAC	AAA	50	33	10	GAC/AAA	0.66	Del-In
Lib10^4_#1 50_Jm^2 U2OS Sel PCR#1	TAG_BX_TCTGTGGAGAAT	95	C	C	G	32	23	9	C/G	0.7188	SNP
Lib10^4_#1 50_Jm^2 U2OS Sel PCR#1	TAG_BX_TCTTATGTTGAG	130	C	C	T	23	16	6	C/T	0.6957	SNP
Lib10^4_#1 50_Jm^2 U2OS Sel PCR#1	TAG_BX_TCTTGACCAACA	5	G	G	A	81	46	33	G/A	0.5679	SNP
Lib10^4_#1 50_Jm^2 U2OS Sel PCR#1	TAG_BX_TCTTGACCAACA	117	C	C	T	78	19	57	C/T	0.2436	SNP
Lib10^4_#1 50_Jm^2 U2OS Sel PCR#1	TAG_BX_TCTTGTAACTAT	117	C	C	T	31	23	8	C/T	0.7419	SNP
Lib10^4_#1 50_Jm^2 U2OS Sel PCR#1	TAG_BX_TCTTTCGCCCTT	88	G	GCAG	ACAA	24	15	6	GCAG/ACAA	0.625	Del-In
Lib10^4_#1 50_Jm^2 U2OS Sel PCR#1	TAG_BX_TCTTTCGCCCTT	88	G	G	A	24	3	6	G/A	0.125	SNP
Lib10^4_#1 50_Jm^2 U2OS Sel PCR#1	TAG_BX_TGAACTAATCCT	-29	C	CTCAACGTAACACTTTACAGCGGCGCGTCATTTGATATGATGCGCCCCGCTTCCCGATAAGGGAGCAGGCCAGTAAAAGCATTACCTGTGGTGGGGTTCCCGAGCGGCCAAAGGGAGCAGACTCTAAATCTGCCGTCATCGACTTCGAAGGTTCGAATCCTTCCCCCACCACCATCACTTTCAAAAGTCCGAAAAGATCCGGCGGCGCAG		143	51	91	CTCAACGTAACACTTTACAGCGGCGCGTCATTTGATATGATGCGCCCCGCTTCCCGATAAGGGAGCAGGCCAGTAAAAGCATTACCTGTGGTGGGGTTCCCGAGCGGCCAAAGGGAGCAGACTCTAAATCTGCCGTCATCGACTTCGAAGGTTCGAATCCTTCCCCCACCACCATCACTTTCAAAAGTCCGAAAAGATCCGGCGGCGCAG/	0.3566	Del
Lib10^4_#1 50_Jm^2 U2OS Sel PCR#1	TAG_BX_TGAACTAATCCT	-6	C	C	G	141	18	51	C/G	0.1277	SNP
Lib10^4_#1 50_Jm^2 U2OS Sel PCR#1	TAG_BX_TGACTCATAGCG	131	C	C	T	70	53	15	C/T	0.7571	SNP
Lib10^4_#1 50_Jm^2 U2OS Sel PCR#1	TAG_BX_TGACTTTATATG	117	C	C	T	20	16	3	C/T	0.8	SNP
Lib10^4_#1 50_Jm^2 U2OS Sel PCR#1	TAG_BX_TGAGTTTTTCGG	121	G	G	A	31	25	5	G/A	0.8065	SNP
Lib10^4_#1 50_Jm^2 U2OS Sel PCR#1	TAG_BX_TGATACCGGTGT	130	C	C	A	61	42	18	C/A	0.6885	SNP
Lib10^4_#1 50_Jm^2 U2OS Sel PCR#1	TAG_BX_TGATACCGGTGT	160	C	C	A	61	43	17	C/A	0.7049	SNP
Lib10^4_#1 50_Jm^2 U2OS Sel PCR#1	TAG_BX_TGATGTTTAACC	137	C	CC	AT	92	69	14	CC/AT	0.75	DNP
Lib10^4_#1 50_Jm^2 U2OS Sel PCR#1	TAG_BX_TGATTGGTTCGA	6	A	ATATGATGCGCCCCGCTTCCCGATAAGGGAGCAGGCCAGTAAAAGCATTACCTGTGGTGGGGTTCCCGAGCGGCCAAAGGGAGCAGACTCTAAATCTGCCGTCATCGACTTCGAAGGTTCGAATCCTTCCCCCACCACC		123	110	8	ATATGATGCGCCCCGCTTCCCGATAAGGGAGCAGGCCAGTAAAAGCATTACCTGTGGTGGGGTTCCCGAGCGGCCAAAGGGAGCAGACTCTAAATCTGCCGTCATCGACTTCGAAGGTTCGAATCCTTCCCCCACCACC/	0.8943	Del
Lib10^4_#1 50_Jm^2 U2OS Sel PCR#1	TAG_BX_TGATTTCTGTCG	-6	C	CGCGTCATTTGATATGATGCGCCCCGCTTCCCGATAAGGGAGCAGGCCAGTAAAAGCATTACCTGTGGTGGGGTTCCCGAGCGGCCAAAGGGAGCAGACT		66	64	1	CGCGTCATTTGATATGATGCGCCCCGCTTCCCGATAAGGGAGCAGGCCAGTAAAAGCATTACCTGTGGTGGGGTTCCCGAGCGGCCAAAGGGAGCAGACT/	0.9697	Del
Lib10^4_#1 50_Jm^2 U2OS Sel PCR#1	TAG_BX_TGCGGAGGTTTC	130	C	C	T	35	28	6	C/T	0.8	SNP
Lib10^4_#1 50_Jm^2 U2OS Sel PCR#1	TAG_BX_TGCGGTAGGGCG	130	C	C	T	71	53	16	C/T	0.7465	SNP
Lib10^4_#1 50_Jm^2 U2OS Sel PCR#1	TAG_BX_TGCGGTTCAACC	130	C	C	T	106	79	21	C/T	0.7453	SNP
Lib10^4_#1 50_Jm^2 U2OS Sel PCR#1	TAG_BX_TGCGTGCGTAAG	117	C	C	T	267	227	36	C/T	0.8502	SNP
Lib10^4_#1 50_Jm^2 U2OS Sel PCR#1	TAG_BX_TGCGTGCGTAAG	125	C	C	T	267	218	46	C/T	0.8165	SNP
Lib10^4_#1 50_Jm^2 U2OS Sel PCR#1	TAG_BX_TGCGTGCGTAAG	147	C	C	G	266	216	48	C/G	0.812	SNP
Lib10^4_#1 50_Jm^2 U2OS Sel PCR#1	TAG_BX_TGCGTGCGTAAG	174	C	C	T	265	207	55	C/T	0.7811	SNP
Lib10^4_#1 50_Jm^2 U2OS Sel PCR#1	TAG_BX_TGCGTGCGTAAG	187	C	C	T	264	204	60	C/T	0.7727	SNP
Lib10^4_#1 50_Jm^2 U2OS Sel PCR#1	TAG_BX_TGCGTGCGTAAG	193	C	C	G	264	203	61	C/G	0.7689	SNP
Lib10^4_#1 50_Jm^2 U2OS Sel PCR#1	TAG_BX_TGCTCGGGCTTA	85	G	G	T	114	40	73	G/T	0.3509	SNP
Lib10^4_#1 50_Jm^2 U2OS Sel PCR#1	TAG_BX_TGCTCGGGCTTA	112	G	GAC	AAA	133	55	60	GAC/AAA	0.4135	Del-In
Lib10^4_#1 50_Jm^2 U2OS Sel PCR#1	TAG_BX_TGCTCGGGCTTA	112	G	G	A	133	17	60	G/A	0.1278	SNP
Lib10^4_#1 50_Jm^2 U2OS Sel PCR#1	TAG_BX_TGCTTGGAAGCT	118	G	G	A	60	48	11	G/A	0.8	SNP
Lib10^4_#1 50_Jm^2 U2OS Sel PCR#1	TAG_BX_TGGCCGGGATTA	5	G	G	A	21	18	3	G/A	0.8571	SNP
Lib10^4_#1 50_Jm^2 U2OS Sel PCR#1	TAG_BX_TGGCCTGTAGAG	118	G	G	A	51	35	15	G/A	0.6863	SNP
Lib10^4_#1 50_Jm^2 U2OS Sel PCR#1	TAG_BX_TGGCTACACTTG	117	C	C	T	15	12	2	C/T	0.8	SNP
Lib10^4_#1 50_Jm^2 U2OS Sel PCR#1	TAG_BX_TGGCTAGTGGGG	131	C	C	T	43	28	13	C/T	0.6512	SNP
Lib10^4_#1 50_Jm^2 U2OS Sel PCR#1	TAG_BX_TGGGATGTGTGT	117	C	C	T	81	61	20	C/T	0.7531	SNP
Lib10^4_#1 50_Jm^2 U2OS Sel PCR#1	TAG_BX_TGGGATGTGTGT	131	C	C	T	81	61	20	C/T	0.7531	SNP
Lib10^4_#1 50_Jm^2 U2OS Sel PCR#1	TAG_BX_TGGGCTGTTCCC	5	G	G	A	150	134	12	G/A	0.8933	SNP
Lib10^4_#1 50_Jm^2 U2OS Sel PCR#1	TAG_BX_TGGGGCTTAGGG	12	T	T	C	328	209	114	T/C	0.6372	SNP
Lib10^4_#1 50_Jm^2 U2OS Sel PCR#1	TAG_BX_TGGGGCTTAGGG	61	G	GG	AA	329	73	246	GG/AA	0.2219	DNP
Lib10^4_#1 50_Jm^2 U2OS Sel PCR#1	TAG_BX_TGGGTGACTAGT	96	T	T	C	71	51	20	T/C	0.7183	SNP
Lib10^4_#1 50_Jm^2 U2OS Sel PCR#1	TAG_BX_TGGTGGCGATGG	97	A	A	T	30	23	6	A/T	0.7667	SNP
Lib10^4_#1 50_Jm^2 U2OS Sel PCR#1	TAG_BX_TGGTGGCGGGTA	118	G	G	C	21	15	3	G/C	0.7143	SNP
Lib10^4_#1 50_Jm^2 U2OS Sel PCR#1	TAG_BX_TGTATCGGGTCA	121	G	G	T	83	68	13	G/T	0.8193	SNP
Lib10^4_#1 50_Jm^2 U2OS Sel PCR#1	TAG_BX_TGTCACGTCCGG	122	G	G	A	118	84	31	G/A	0.7119	SNP
Lib10^4_#1 50_Jm^2 U2OS Sel PCR#1	TAG_BX_TGTCACGTTGCG	130	C	CCTT	TCTC	126	72	25	CCTT/TCTC	0.5714	Del-In
Lib10^4_#1 50_Jm^2 U2OS Sel PCR#1	TAG_BX_TGTCCTGGACCC	-34	C	C	T	554	536	17	C/T	0.9675	SNP
Lib10^4_#1 50_Jm^2 U2OS Sel PCR#1	TAG_BX_TGTCCTGGACCC	95	C	C	G	536	424	96	C/G	0.791	SNP
Lib10^4_#1 50_Jm^2 U2OS Sel PCR#1	TAG_BX_TGTCCTGGACCC	108	C	C	T	536	410	115	C/T	0.7649	SNP
Lib10^4_#1 50_Jm^2 U2OS Sel PCR#1	TAG_BX_TGTCTAAGTAGA	5	G	GATA	AATG	15	11	2	GATA/AATG	0.7333	Del-In
Lib10^4_#1 50_Jm^2 U2OS Sel PCR#1	TAG_BX_TGTCTCAACCTT	130	C	C	T	153	120	29	C/T	0.7843	SNP
Lib10^4_#1 50_Jm^2 U2OS Sel PCR#1	TAG_BX_TGTGCAGAGCGG	130	C	C	T	90	67	20	C/T	0.7444	SNP
Lib10^4_#1 50_Jm^2 U2OS Sel PCR#1	TAG_BX_TGTGGATTGACA	130	C	CC	TT	34	22	6	CC/TT	0.6471	DNP
Lib10^4_#1 50_Jm^2 U2OS Sel PCR#1	TAG_BX_TGTGGATTGACA	130	C	C	T	34	6	6	C/T	0.1765	SNP
Lib10^4_#1 50_Jm^2 U2OS Sel PCR#1	TAG_BX_TGTGGGTACATC	130	C	C	T	185	143	38	C/T	0.773	SNP
Lib10^4_#1 50_Jm^2 U2OS Sel PCR#1	TAG_BX_TGTGTGCGCAGT	117	C	C	T	58	50	7	C/T	0.8621	SNP
Lib10^4_#1 50_Jm^2 U2OS Sel PCR#1	TAG_BX_TGTGTGGGCTCG	118	G	G	A	48	42	5	G/A	0.875	SNP
Lib10^4_#1 50_Jm^2 U2OS Sel PCR#1	TAG_BX_TGTGTTTATTCT	5	G	G	A	37	32	5	G/A	0.8649	SNP
Lib10^4_#1 50_Jm^2 U2OS Sel PCR#1	TAG_BX_TGTTGGTCTGCT	5	G	G	A	78	74	4	G/A	0.9487	SNP
Lib10^4_#1 50_Jm^2 U2OS Sel PCR#1	TAG_BX_TGTTTAGACGGG	5	G	G	A	26	24	1	G/A	0.9231	SNP
Lib10^4_#1 50_Jm^2 U2OS Sel PCR#1	TAG_BX_TGTTTCTTTTGC	-25	A	ACGTAACACTTTACAGCGGCGCGTCATTTGATATGATGCGCCCCGCTTCCCGATAAGGGAGCAGGCCAGTAAAAGCATTACCTGTGGTGGGGTTCCCGAGCGGCCAAAGGGAGCAGACT		377	355	8	ACGTAACACTTTACAGCGGCGCGTCATTTGATATGATGCGCCCCGCTTCCCGATAAGGGAGCAGGCCAGTAAAAGCATTACCTGTGGTGGGGTTCCCGAGCGGCCAAAGGGAGCAGACT/	0.9416	Del
Lib10^4_#1 50_Jm^2 U2OS Sel PCR#1	TAG_BX_TGTTTCTTTTGC	94	T	T	G	22	5	4	T/G	0.2273	SNP
Lib10^4_#1 50_Jm^2 U2OS Sel PCR#1	TAG_BX_TGTTTGGTGGTC	134	C	C		92	66	25	C/	0.7174	1Del
Lib10^4_#1 50_Jm^2 U2OS Sel PCR#1	TAG_BX_TTACATTAAAAG	118	G	G	A	81	62	18	G/A	0.7654	SNP
Lib10^4_#1 50_Jm^2 U2OS Sel PCR#1	TAG_BX_TTACTGGGTCGA	101	C	C	A	114	85	25	C/A	0.7456	SNP
Lib10^4_#1 50_Jm^2 U2OS Sel PCR#1	TAG_BX_TTACTGGGTCGA	191	C	C	T	113	83	29	C/T	0.7345	SNP
Lib10^4_#1 50_Jm^2 U2OS Sel PCR#1	TAG_BX_TTAGATATAGTT	85	G	G	A	68	55	12	G/A	0.8088	SNP
Lib10^4_#1 50_Jm^2 U2OS Sel PCR#1	TAG_BX_TTATACTAGCGA	118	G	G	A	226	176	41	G/A	0.7788	SNP
Lib10^4_#1 50_Jm^2 U2OS Sel PCR#1	TAG_BX_TTATGCGGGGTG	121	G	GG	TA	62	38	14	GG/TA	0.6129	DNP
Lib10^4_#1 50_Jm^2 U2OS Sel PCR#1	TAG_BX_TTATGCGGGGTG	121	G	G	T	62	9	14	G/T	0.1452	SNP
Lib10^4_#1 50_Jm^2 U2OS Sel PCR#1	TAG_BX_TTATGGTCGGGC	108	C	CATC	TATT	166	104	30	CATC/TATT	0.6265	Del-In
Lib10^4_#1 50_Jm^2 U2OS Sel PCR#1	TAG_BX_TTATGGTCGGGC	125	C	C	G	135	103	29	C/G	0.763	SNP
Lib10^4_#1 50_Jm^2 U2OS Sel PCR#1	TAG_BX_TTATGTCTGATG	131	C	C	G	21	13	7	C/G	0.619	SNP
Lib10^4_#1 50_Jm^2 U2OS Sel PCR#1	TAG_BX_TTATGTTCTATT	130	C	C	T	64	49	13	C/T	0.7656	SNP
Lib10^4_#1 50_Jm^2 U2OS Sel PCR#1	TAG_BX_TTATTGAGGGCC	131	C	C	T	63	41	19	C/T	0.6508	SNP
Lib10^4_#1 50_Jm^2 U2OS Sel PCR#1	TAG_BX_TTATTTAGCTCT	73	G	GAG	AAA	180	139	20	GAG/AAA	0.7722	Del-In
Lib10^4_#1 50_Jm^2 U2OS Sel PCR#1	TAG_BX_TTATTTATGAAG	5	G	G	A	77	73	3	G/A	0.9481	SNP
Lib10^4_#1 50_Jm^2 U2OS Sel PCR#1	TAG_BX_TTATTTTGTTTA	5	G	G	C	79	74	5	G/C	0.9367	SNP
Lib10^4_#1 50_Jm^2 U2OS Sel PCR#1	TAG_BX_TTATTTTGTTTA	27	G	G	A	78	71	6	G/A	0.9103	SNP
Lib10^4_#1 50_Jm^2 U2OS Sel PCR#1	TAG_BX_TTCAACCGGATT	118	G	G	T	45	35	9	G/T	0.7778	SNP
Lib10^4_#1 50_Jm^2 U2OS Sel PCR#1	TAG_BX_TTCACAGGCTGC	130	C	C	T	42	27	15	C/T	0.6429	SNP
Lib10^4_#1 50_Jm^2 U2OS Sel PCR#1	TAG_BX_TTCATCATGTCC	118	G	G	A	214	173	39	G/A	0.8084	SNP
Lib10^4_#1 50_Jm^2 U2OS Sel PCR#1	TAG_BX_TTCCCTGCCGTT	85	G	G	A	36	25	8	G/A	0.6944	SNP
Lib10^4_#1 50_Jm^2 U2OS Sel PCR#1	TAG_BX_TTCGTTATAACG	5	G	G	A	13	12	0	G/A	0.9231	SNP
Lib10^4_#1 50_Jm^2 U2OS Sel PCR#1	TAG_BX_TTCTAGGTTTGA	121	G	G	A	40	31	7	G/A	0.775	SNP
Lib10^4_#1 50_Jm^2 U2OS Sel PCR#1	TAG_BX_TTCTGTGATTTG	117	C	C	T	16	11	5	C/T	0.6875	SNP
Lib10^4_#1 50_Jm^2 U2OS Sel PCR#1	TAG_BX_TTCTTATGGCTG	85	G	G	A	76	69	7	G/A	0.9079	SNP
Lib10^4_#1 50_Jm^2 U2OS Sel PCR#1	TAG_BX_TTCTTGCTGGTT	137	C	CC	AT	231	165	39	CC/AT	0.7143	DNP
Lib10^4_#1 50_Jm^2 U2OS Sel PCR#1	TAG_BX_TTCTTGCTGGTT	175	G	G	T	205	161	43	G/T	0.7854	SNP
Lib10^4_#1 50_Jm^2 U2OS Sel PCR#1	TAG_BX_TTCTTGCTGGTT	190	C	C	T	205	153	52	C/T	0.7463	SNP
Lib10^4_#1 50_Jm^2 U2OS Sel PCR#1	TAG_BX_TTCTTGTGGTAT	91	G	G	A	21	21	0	G/A	1	SNP
Lib10^4_#1 50_Jm^2 U2OS Sel PCR#1	TAG_BX_TTGAATTGCTGG	130	C	C	T	913	683	207	C/T	0.7481	SNP
Lib10^4_#1 50_Jm^2 U2OS Sel PCR#1	TAG_BX_TTGACCGGGCGT	118	G	G	A	76	65	9	G/A	0.8553	SNP
Lib10^4_#1 50_Jm^2 U2OS Sel PCR#1	TAG_BX_TTGAGCTGTCCT	118	G	G	A	78	57	19	G/A	0.7308	SNP
Lib10^4_#1 50_Jm^2 U2OS Sel PCR#1	TAG_BX_TTGGATCTTCAT	121	G	G	A	160	119	37	G/A	0.7438	SNP
Lib10^4_#1 50_Jm^2 U2OS Sel PCR#1	TAG_BX_TTGGCGATGTTT	131	C	C	T	101	79	19	C/T	0.7822	SNP
Lib10^4_#1 50_Jm^2 U2OS Sel PCR#1	TAG_BX_TTGGTGTGGCAG	131	C	C	T	128	83	39	C/T	0.6484	SNP
Lib10^4_#1 50_Jm^2 U2OS Sel PCR#1	TAG_BX_TTGTGGAGGTAA	8	A	A	G	173	160	10	A/G	0.9249	SNP
Lib10^4_#1 50_Jm^2 U2OS Sel PCR#1	TAG_BX_TTGTTGGCGCTG	130	C	C	T	95	72	19	C/T	0.7579	SNP
Lib10^4_#1 50_Jm^2 U2OS Sel PCR#1	TAG_BX_TTGTTGTGGTTC	118	G	G	A	320	260	44	G/A	0.8125	SNP
Lib10^4_#1 50_Jm^2 U2OS Sel PCR#1	TAG_BX_TTTAACTGACTT	117	C	C	T	25	19	5	C/T	0.76	SNP
Lib10^4_#1 50_Jm^2 U2OS Sel PCR#1	TAG_BX_TTTAATCCCTGT	61	G	GG	TA	85	55	17	GG/TA	0.6471	DNP
Lib10^4_#1 50_Jm^2 U2OS Sel PCR#1	TAG_BX_TTTACGCTGCAA	130	C	C	T	242	192	47	C/T	0.7934	SNP
Lib10^4_#1 50_Jm^2 U2OS Sel PCR#1	TAG_BX_TTTAGGCGCTAG	85	G	G	A	74	61	10	G/A	0.8243	SNP
Lib10^4_#1 50_Jm^2 U2OS Sel PCR#1	TAG_BX_TTTCTCCTTAAG	118	G	G	A	142	116	22	G/A	0.8169	SNP
Lib10^4_#1 50_Jm^2 U2OS Sel PCR#1	TAG_BX_TTTCTGTCAAAC	130	C	C	T	52	38	13	C/T	0.7308	SNP
Lib10^4_#1 50_Jm^2 U2OS Sel PCR#1	TAG_BX_TTTCTTACTGCA	8	A	AT	TC	23	18	5	AT/TC	0.7826	DNP
Lib10^4_#1 50_Jm^2 U2OS Sel PCR#1	TAG_BX_TTTGAAGAAAAC	125	C	C	T	56	41	12	C/T	0.7321	SNP
Lib10^4_#1 50_Jm^2 U2OS Sel PCR#1	TAG_BX_TTTGAAGAAAAC	130	C	C	T	56	43	12	C/T	0.7679	SNP
Lib10^4_#1 50_Jm^2 U2OS Sel PCR#1	TAG_BX_TTTGCCTTTGAG	101	C	C	T	101	74	27	C/T	0.7327	SNP
Lib10^4_#1 50_Jm^2 U2OS Sel PCR#1	TAG_BX_TTTGCCTTTGAG	131	C	C	T	101	75	26	C/T	0.7426	SNP
Lib10^4_#1 50_Jm^2 U2OS Sel PCR#1	TAG_BX_TTTGTCTACTTT	-21	A	A		67	66	0	A/	0.9851	1Del
Lib10^4_#1 50_Jm^2 U2OS Sel PCR#1	TAG_BX_TTTGTCTACTTT	33	G	G	A	65	58	6	G/A	0.8923	SNP
Lib10^4_#1 50_Jm^2 U2OS Sel PCR#1	TAG_BX_TTTGTCTACTTT	77	G	GG	AT	74	48	7	GG/AT	0.6486	DNP
Lib10^4_#1 50_Jm^2 U2OS Sel PCR#1	TAG_BX_TTTGTCTACTTT	77	G	G	A	74	17	7	G/A	0.2297	SNP
Lib10^4_#1 50_Jm^2 U2OS Sel PCR#1	TAG_BX_TTTGTTCGTTTC	118	G	G	A	34	26	8	G/A	0.7647	SNP
Lib10^4_#1 50_Jm^2 U2OS Sel PCR#1	TAG_BX_TTTGTTGGATAG	85	G	G	A	226	161	59	G/A	0.7124	SNP
Lib10^4_#1 50_Jm^2 U2OS Sel PCR#1	TAG_BX_TTTGTTTGTAGA	101	C	C	T	39	35	4	C/T	0.8974	SNP
Lib10^4_#1 50_Jm^2 U2OS Sel PCR#1	TAG_BX_TTTGTTTGTAGA	108	C	C	A	39	36	3	C/A	0.9231	SNP
Lib10^4_#1 50_Jm^2 U2OS Sel PCR#1	TAG_BX_TTTGTTTTTAGG	117	C	C	T	25	21	3	C/T	0.84	SNP
Lib10^4_#1 50_Jm^2 U2OS Sel PCR#1	TAG_BX_TTTTAGAACATT	32	G	G	A	64	58	6	G/A	0.9062	SNP
Lib10^4_#1 50_Jm^2 U2OS Sel PCR#1	TAG_BX_TTTTAGAACATT	118	G	G	A	63	49	14	G/A	0.7778	SNP
Lib10^4_#1 50_Jm^2 U2OS Sel PCR#1	TAG_BX_TTTTGGTTGGGC	73	G	GAG	TAA	138	91	20	GAG/TAA	0.6594	Del-In
Lib10^4_#1 50_Jm^2 U2OS Sel PCR#1	TAG_BX_TTTTGGTTGGGC	73	G	G	T	138	22	20	G/T	0.1594	SNP
Lib10^4_#1 50_Jm^2 U2OS Sel PCR#1	TAG_BX_TTTTTAGAGGCG	27	G	G	C	127	112	12	G/C	0.8819	SNP
Lib10^4_#1 50_Jm^2 U2OS Sel PCR#1	TAG_BX_TTTTTAGAGGCG	85	G	G	A	127	106	17	G/A	0.8346	SNP
Lib10^4_#1 100_Jm^2 U2OS Sel PCR#1	TAG_BX_AAAAGGCCTCTT	118	G	G	A	56	47	7	G/A	0.8393	SNP
Lib10^4_#1 100_Jm^2 U2OS Sel PCR#1	TAG_BX_AAACTTATTTAT	108	C	CATC	TATT	25	15	4	CATC/TATT	0.6	Del-In
Lib10^4_#1 100_Jm^2 U2OS Sel PCR#1	TAG_BX_AAACTTATTTAT	117	C	C	A	19	15	4	C/A	0.7895	SNP
Lib10^4_#1 100_Jm^2 U2OS Sel PCR#1	TAG_BX_AAAGCAGGGTGT	118	G	G	A	37	32	5	G/A	0.8649	SNP
Lib10^4_#1 100_Jm^2 U2OS Sel PCR#1	TAG_BX_AAAGGGGACCTA	96	T	T	C	31	23	7	T/C	0.7419	SNP
Lib10^4_#1 100_Jm^2 U2OS Sel PCR#1	TAG_BX_AAATTTCTTTCG	118	G	G	A	52	6	46	G/A	0.1154	SNP
Lib10^4_#1 100_Jm^2 U2OS Sel PCR#1	TAG_BX_AAATTTCTTTCG	121	G	G	A	52	37	14	G/A	0.7115	SNP
Lib10^4_#1 100_Jm^2 U2OS Sel PCR#1	TAG_BX_AACCATTTAGAC	117	C	C	A	47	33	14	C/A	0.7021	SNP
Lib10^4_#1 100_Jm^2 U2OS Sel PCR#1	TAG_BX_AACCCTACTTGG	103	G	G	A	58	43	14	G/A	0.7414	SNP
Lib10^4_#1 100_Jm^2 U2OS Sel PCR#1	TAG_BX_AACCCTACTTGG	125	C	C	T	59	44	15	C/T	0.7458	SNP
Lib10^4_#1 100_Jm^2 U2OS Sel PCR#1	TAG_BX_AACCGGTCTTCC	130	C	C	T	178	130	44	C/T	0.7303	SNP
Lib10^4_#1 100_Jm^2 U2OS Sel PCR#1	TAG_BX_AACCTTAGCTCC	118	G	G	C	107	85	20	G/C	0.7944	SNP
Lib10^4_#1 100_Jm^2 U2OS Sel PCR#1	TAG_BX_AACGGCTCTAGG	5	G	G	A	13	12	0	G/A	0.9231	SNP
Lib10^4_#1 100_Jm^2 U2OS Sel PCR#1	TAG_BX_AACGTACATTTT	-27	C	C	T	69	47	22	C/T	0.6812	SNP
Lib10^4_#1 100_Jm^2 U2OS Sel PCR#1	TAG_BX_AACGTACATTTT	85	G	G	A	69	19	49	G/A	0.2754	SNP
Lib10^4_#1 100_Jm^2 U2OS Sel PCR#1	TAG_BX_AACGTACATTTT	91	G	G	T	69	18	50	G/T	0.2609	SNP
Lib10^4_#1 100_Jm^2 U2OS Sel PCR#1	TAG_BX_AACGTACATTTT	95	C	C	G	69	34	35	C/G	0.4928	SNP
Lib10^4_#1 100_Jm^2 U2OS Sel PCR#1	TAG_BX_AACGTTGGCTAA	85	G	G	A	54	40	13	G/A	0.7407	SNP
Lib10^4_#1 100_Jm^2 U2OS Sel PCR#1	TAG_BX_AACTTCTGGCGC	85	G	G	A	36	32	4	G/A	0.8889	SNP
Lib10^4_#1 100_Jm^2 U2OS Sel PCR#1	TAG_BX_AAGACGGGATGT	21	C	CT	TA	377	272	43	CT/TA	0.7215	DNP
Lib10^4_#1 100_Jm^2 U2OS Sel PCR#1	TAG_BX_AAGACGGGATGT	121	G	G	A	318	233	82	G/A	0.7327	SNP
Lib10^4_#1 100_Jm^2 U2OS Sel PCR#1	TAG_BX_AAGAGTAGCGCT	83	A	AG	TA	24	17	5	AG/TA	0.7083	DNP
Lib10^4_#1 100_Jm^2 U2OS Sel PCR#1	TAG_BX_AAGGGGCGTGCT	118	G	G	A	290	229	52	G/A	0.7897	SNP
Lib10^4_#1 100_Jm^2 U2OS Sel PCR#1	TAG_BX_AAGTATTAACGT	84	G	GG	AA	169	90	74	GG/AA	0.5325	DNP
Lib10^4_#1 100_Jm^2 U2OS Sel PCR#1	TAG_BX_AAGTATTAACGT	118	G	G	A	163	41	119	G/A	0.2515	SNP
Lib10^4_#1 100_Jm^2 U2OS Sel PCR#1	TAG_BX_AAGTATTAACGT	121	G	G	T	163	83	78	G/T	0.5092	SNP
Lib10^4_#1 100_Jm^2 U2OS Sel PCR#1	TAG_BX_AAGTCCGATGCC	118	G	G	A	40	26	14	G/A	0.65	SNP
Lib10^4_#1 100_Jm^2 U2OS Sel PCR#1	TAG_BX_AAGTTCTAGAGG	5	G	G	A	31	28	3	G/A	0.9032	SNP
Lib10^4_#1 100_Jm^2 U2OS Sel PCR#1	TAG_BX_AAGTTCTAGAGG	108	C	C	T	30	20	10	C/T	0.6667	SNP
Lib10^4_#1 100_Jm^2 U2OS Sel PCR#1	TAG_BX_AATACCCATCAA	55	A	A	C	15	2	13	A/C	0.1333	SNP
Lib10^4_#1 100_Jm^2 U2OS Sel PCR#1	TAG_BX_AATACCCATCAA	118	G	G	A	15	12	3	G/A	0.8	SNP
Lib10^4_#1 100_Jm^2 U2OS Sel PCR#1	TAG_BX_AATAGCCTCTTT	118	G	G	A	44	35	7	G/A	0.7955	SNP
Lib10^4_#1 100_Jm^2 U2OS Sel PCR#1	TAG_BX_AATATGTTTTAA	121	G	G	A	32	25	7	G/A	0.7812	SNP
Lib10^4_#1 100_Jm^2 U2OS Sel PCR#1	TAG_BX_AATATTCAAGGG	122	G	G	A	22	18	4	G/A	0.8182	SNP
Lib10^4_#1 100_Jm^2 U2OS Sel PCR#1	TAG_BX_AATCATGTCTAT	131	C	C	T	124	95	28	C/T	0.7661	SNP
Lib10^4_#1 100_Jm^2 U2OS Sel PCR#1	TAG_BX_AATGAAGTAATC	118	G	G	A	66	49	15	G/A	0.7424	SNP
Lib10^4_#1 100_Jm^2 U2OS Sel PCR#1	TAG_BX_AATTCACAGCCC	118	G	G	A	26	17	8	G/A	0.6538	SNP
Lib10^4_#1 100_Jm^2 U2OS Sel PCR#1	TAG_BX_AATTCTTAACTG	11	A	A	T	37	32	5	A/T	0.8649	SNP
Lib10^4_#1 100_Jm^2 U2OS Sel PCR#1	TAG_BX_AATTGAGTCCCA	39	G	GGCCAGTAAAAGCATTACCTGTGGTGGGGTTCCCGAGCGGCCAAAGGGAGCAGACTCTAAATCTGCCGTCATC		24	20	3	GGCCAGTAAAAGCATTACCTGTGGTGGGGTTCCCGAGCGGCCAAAGGGAGCAGACTCTAAATCTGCCGTCATC/	0.8333	Del
Lib10^4_#1 100_Jm^2 U2OS Sel PCR#1	TAG_BX_AATTGGAGTTGC	118	G	G	A	38	31	6	G/A	0.8158	SNP
Lib10^4_#1 100_Jm^2 U2OS Sel PCR#1	TAG_BX_AATTGTTTCGGT	118	G	G	A	102	87	14	G/A	0.8529	SNP
Lib10^4_#1 100_Jm^2 U2OS Sel PCR#1	TAG_BX_AATTTGGTAATG	85	G	G	A	39	29	9	G/A	0.7436	SNP
Lib10^4_#1 100_Jm^2 U2OS Sel PCR#1	TAG_BX_AATTTTATTACG	5	G	G	A	33	29	4	G/A	0.8788	SNP
Lib10^4_#1 100_Jm^2 U2OS Sel PCR#1	TAG_BX_AATTTTGGATCG	-59	C	C	T	55	55	0	C/T	1	SNP
Lib10^4_#1 100_Jm^2 U2OS Sel PCR#1	TAG_BX_AATTTTGGATCG	130	C	C	T	55	40	15	C/T	0.7273	SNP
Lib10^4_#1 100_Jm^2 U2OS Sel PCR#1	TAG_BX_ACAACTTCGCCT	118	G	G	A	53	43	10	G/A	0.8113	SNP
Lib10^4_#1 100_Jm^2 U2OS Sel PCR#1	TAG_BX_ACATAAGGTAAT	118	G	G	A	87	71	16	G/A	0.8161	SNP
Lib10^4_#1 100_Jm^2 U2OS Sel PCR#1	TAG_BX_ACCAAGGGTCGG	98	A	AA	TT	56	33	14	AA/TT	0.5893	DNP
Lib10^4_#1 100_Jm^2 U2OS Sel PCR#1	TAG_BX_ACCATTTTCAAG	83	A	AG	TA	17	16	1	AG/TA	0.9412	DNP
Lib10^4_#1 100_Jm^2 U2OS Sel PCR#1	TAG_BX_ACCGCTGTGTCG	118	G	G	A	97	72	23	G/A	0.7423	SNP
Lib10^4_#1 100_Jm^2 U2OS Sel PCR#1	TAG_BX_ACCGGTACGATT	-34	C	CCTTTCTCAACGTAACACTTTACAGCGGCGCGTCATTTGATATGATGCGCCCCGCTTCCCGATAAGGGAG		148	138	4	CCTTTCTCAACGTAACACTTTACAGCGGCGCGTCATTTGATATGATGCGCCCCGCTTCCCGATAAGGGAG/	0.9324	Del
Lib10^4_#1 100_Jm^2 U2OS Sel PCR#1	TAG_BX_ACCGTCCTGGTT	118	G	G	A	45	40	4	G/A	0.8889	SNP
Lib10^4_#1 100_Jm^2 U2OS Sel PCR#1	TAG_BX_ACCGTCGCCGTG	97	A	A	G	40	32	8	A/G	0.8	SNP
Lib10^4_#1 100_Jm^2 U2OS Sel PCR#1	TAG_BX_ACCTGGCAGGAT	73	G	GAG	AAA	82	65	7	GAG/AAA	0.7927	Del-In
Lib10^4_#1 100_Jm^2 U2OS Sel PCR#1	TAG_BX_ACCTGGCAGGAT	73	G	G	A	82	10	7	G/A	0.122	SNP
Lib10^4_#1 100_Jm^2 U2OS Sel PCR#1	TAG_BX_ACCTGGGACTGT	118	G	G	A	29	22	7	G/A	0.7586	SNP
Lib10^4_#1 100_Jm^2 U2OS Sel PCR#1	TAG_BX_ACGACTTTAAGC	130	C	C	T	160	121	38	C/T	0.7562	SNP
Lib10^4_#1 100_Jm^2 U2OS Sel PCR#1	TAG_BX_ACGAGCTGTCTT	132	T	TTC	ATA	78	49	13	TTC/ATA	0.6282	Del-In
Lib10^4_#1 100_Jm^2 U2OS Sel PCR#1	TAG_BX_ACGAGCTGTCTT	132	T	T	A	78	15	13	T/A	0.1923	SNP
Lib10^4_#1 100_Jm^2 U2OS Sel PCR#1	TAG_BX_ACGAGCTTCTCG	5	G	G	C	71	64	6	G/C	0.9014	SNP
Lib10^4_#1 100_Jm^2 U2OS Sel PCR#1	TAG_BX_ACGCACATCCGA	118	G	G	A	49	43	6	G/A	0.8776	SNP
Lib10^4_#1 100_Jm^2 U2OS Sel PCR#1	TAG_BX_ACGGATTCGTTA	134	C	C	A	17	12	4	C/A	0.7059	SNP
Lib10^4_#1 100_Jm^2 U2OS Sel PCR#1	TAG_BX_ACGGCTTGTGTG	118	G	G	T	55	35	16	G/T	0.6364	SNP
Lib10^4_#1 100_Jm^2 U2OS Sel PCR#1	TAG_BX_ACGGGCGTTTTT	118	G	G	A	70	57	12	G/A	0.8143	SNP
Lib10^4_#1 100_Jm^2 U2OS Sel PCR#1	TAG_BX_ACGGGGCGACAT	118	G	G	A	59	47	12	G/A	0.7966	SNP
Lib10^4_#1 100_Jm^2 U2OS Sel PCR#1	TAG_BX_ACGTAATGTTCC	5	G	GAT	AAA	157	127	14	GAT/AAA	0.8089	Del-In
Lib10^4_#1 100_Jm^2 U2OS Sel PCR#1	TAG_BX_ACGTACAGCAAG	118	G	G	A	39	29	8	G/A	0.7436	SNP
Lib10^4_#1 100_Jm^2 U2OS Sel PCR#1	TAG_BX_ACGTCTGTTGGC	118	G	G	A	55	47	7	G/A	0.8545	SNP
Lib10^4_#1 100_Jm^2 U2OS Sel PCR#1	TAG_BX_ACGTGCATGCAG	118	G	G	A	48	39	9	G/A	0.8125	SNP
Lib10^4_#1 100_Jm^2 U2OS Sel PCR#1	TAG_BX_ACGTGCATTAAT	-14	T	T	A	43	42	1	T/A	0.9767	SNP
Lib10^4_#1 100_Jm^2 U2OS Sel PCR#1	TAG_BX_ACGTGCATTAAT	130	C	CC	AT	48	30	10	CC/AT	0.625	DNP
Lib10^4_#1 100_Jm^2 U2OS Sel PCR#1	TAG_BX_ACGTGGGTAGTA	130	C	CCTT	ACTA	272	149	49	CCTT/ACTA	0.5478	Del-In
Lib10^4_#1 100_Jm^2 U2OS Sel PCR#1	TAG_BX_ACTATGGTTCAC	83	A	AG	TA	40	30	9	AG/TA	0.75	DNP
Lib10^4_#1 100_Jm^2 U2OS Sel PCR#1	TAG_BX_ACTATGGTTCAC	118	G	G	A	39	4	34	G/A	0.1026	SNP
Lib10^4_#1 100_Jm^2 U2OS Sel PCR#1	TAG_BX_ACTCCCGTAAGT	5	G	G	A	23	21	2	G/A	0.913	SNP
Lib10^4_#1 100_Jm^2 U2OS Sel PCR#1	TAG_BX_ACTGGATGTGAC	134	C	C	G	53	37	14	C/G	0.6981	SNP
Lib10^4_#1 100_Jm^2 U2OS Sel PCR#1	TAG_BX_ACTGTGCCTAAC	120	A	AG	TA	100	72	18	AG/TA	0.72	DNP
Lib10^4_#1 100_Jm^2 U2OS Sel PCR#1	TAG_BX_ACTGTGCCTAAC	120	A	A	T	100	10	18	A/T	0.1	SNP
Lib10^4_#1 100_Jm^2 U2OS Sel PCR#1	TAG_BX_ACTTTCTTGGGA	130	C	C	T	56	39	17	C/T	0.6964	SNP
Lib10^4_#1 100_Jm^2 U2OS Sel PCR#1	TAG_BX_AGACGTGGGTTG	118	G	G	A	25	21	4	G/A	0.84	SNP
Lib10^4_#1 100_Jm^2 U2OS Sel PCR#1	TAG_BX_AGACTTACCGGT	117	C	C	A	29	21	8	C/A	0.7241	SNP
Lib10^4_#1 100_Jm^2 U2OS Sel PCR#1	TAG_BX_AGAGGATGGAAA	55	A	A	C	49	6	43	A/C	0.1224	SNP
Lib10^4_#1 100_Jm^2 U2OS Sel PCR#1	TAG_BX_AGAGGATGGAAA	130	C	C	T	49	34	15	C/T	0.6939	SNP
Lib10^4_#1 100_Jm^2 U2OS Sel PCR#1	TAG_BX_AGATCTTTCCAT	5	G	GATA	TATT	240	189	26	GATA/TATT	0.7875	Del-In
Lib10^4_#1 100_Jm^2 U2OS Sel PCR#1	TAG_BX_AGATGATTAGCC	69	T	T	C	26	3	23	T/C	0.1154	SNP
Lib10^4_#1 100_Jm^2 U2OS Sel PCR#1	TAG_BX_AGATGATTAGCC	130	C	C	T	25	18	5	C/T	0.72	SNP
Lib10^4_#1 100_Jm^2 U2OS Sel PCR#1	TAG_BX_AGCACGGTGGTG	118	G	G	A	139	109	29	G/A	0.7842	SNP
Lib10^4_#1 100_Jm^2 U2OS Sel PCR#1	TAG_BX_AGCCTGAATTTT	5	G	G		36	33	3	G/	0.9167	1Del
Lib10^4_#1 100_Jm^2 U2OS Sel PCR#1	TAG_BX_AGCCTGAATTTT	70	C	C	T	35	29	6	C/T	0.8286	SNP
Lib10^4_#1 100_Jm^2 U2OS Sel PCR#1	TAG_BX_AGCCTGAATTTT	160	C	C	T	35	29	6	C/T	0.8286	SNP
Lib10^4_#1 100_Jm^2 U2OS Sel PCR#1	TAG_BX_AGCGACTTCACG	70	C	C	A	33	24	9	C/A	0.7273	SNP
Lib10^4_#1 100_Jm^2 U2OS Sel PCR#1	TAG_BX_AGCGACTTCACG	131	C	C	T	33	25	8	C/T	0.7576	SNP
Lib10^4_#1 100_Jm^2 U2OS Sel PCR#1	TAG_BX_AGCGGCACATCG	4	T	TG	AA	62	54	3	TG/AA	0.871	DNP
Lib10^4_#1 100_Jm^2 U2OS Sel PCR#1	TAG_BX_AGCTCCAGTTTT	-56	G	G	T	83	83	0	G/T	1	SNP
Lib10^4_#1 100_Jm^2 U2OS Sel PCR#1	TAG_BX_AGCTCCAGTTTT	34	G	G	A	80	64	15	G/A	0.8	SNP
Lib10^4_#1 100_Jm^2 U2OS Sel PCR#1	TAG_BX_AGCTCCAGTTTT	118	G	G	A	80	62	17	G/A	0.775	SNP
Lib10^4_#1 100_Jm^2 U2OS Sel PCR#1	TAG_BX_AGGATTTGACAA	118	G	G	A	63	36	26	G/A	0.5714	SNP
Lib10^4_#1 100_Jm^2 U2OS Sel PCR#1	TAG_BX_AGGATTTGACAA	125	C	C	T	63	17	46	C/T	0.2698	SNP
Lib10^4_#1 100_Jm^2 U2OS Sel PCR#1	TAG_BX_AGGATTTGACAA	130	C	C	T	63	18	44	C/T	0.2857	SNP
Lib10^4_#1 100_Jm^2 U2OS Sel PCR#1	TAG_BX_AGGCCGGCACGT	5	G	G	C	103	91	12	G/C	0.8835	SNP
Lib10^4_#1 100_Jm^2 U2OS Sel PCR#1	TAG_BX_AGGCCGGCACGT	91	G	G	A	101	70	29	G/A	0.6931	SNP
Lib10^4_#1 100_Jm^2 U2OS Sel PCR#1	TAG_BX_AGGCCTTTCCGT	131	C	C	T	71	53	17	C/T	0.7465	SNP
Lib10^4_#1 100_Jm^2 U2OS Sel PCR#1	TAG_BX_AGGCGTTTGTTA	118	G	G	A	38	25	12	G/A	0.6579	SNP
Lib10^4_#1 100_Jm^2 U2OS Sel PCR#1	TAG_BX_AGGGCCTTAATT	5	G	G	A	44	11	33	G/A	0.25	SNP
Lib10^4_#1 100_Jm^2 U2OS Sel PCR#1	TAG_BX_AGGGCCTTAATT	27	G	G	A	43	26	15	G/A	0.6047	SNP
Lib10^4_#1 100_Jm^2 U2OS Sel PCR#1	TAG_BX_AGGGCCTTAATT	66	G	G	A	43	25	17	G/A	0.5814	SNP
Lib10^4_#1 100_Jm^2 U2OS Sel PCR#1	TAG_BX_AGGGCCTTAATT	73	G	G	A	43	26	17	G/A	0.6047	SNP
Lib10^4_#1 100_Jm^2 U2OS Sel PCR#1	TAG_BX_AGGGCCTTAATT	86	G	G	C	43	26	16	G/C	0.6047	SNP
Lib10^4_#1 100_Jm^2 U2OS Sel PCR#1	TAG_BX_AGGTACGTTGAC	101	C	C	A	142	116	26	C/A	0.8169	SNP
Lib10^4_#1 100_Jm^2 U2OS Sel PCR#1	TAG_BX_AGGTACGTTGAC	111	C	C	T	142	115	26	C/T	0.8099	SNP
Lib10^4_#1 100_Jm^2 U2OS Sel PCR#1	TAG_BX_AGGTACGTTGAC	125	C	C	T	142	111	29	C/T	0.7817	SNP
Lib10^4_#1 100_Jm^2 U2OS Sel PCR#1	TAG_BX_AGGTGCGTGTGT	112	G	GAC	AAA	27	11	5	GAC/AAA	0.4074	Del-In
Lib10^4_#1 100_Jm^2 U2OS Sel PCR#1	TAG_BX_AGGTGCGTGTGT	112	G	G	A	27	10	5	G/A	0.3704	SNP
Lib10^4_#1 100_Jm^2 U2OS Sel PCR#1	TAG_BX_AGGTGTCTTCTA	118	G	G	A	58	7	51	G/A	0.1207	SNP
Lib10^4_#1 100_Jm^2 U2OS Sel PCR#1	TAG_BX_AGGTGTCTTCTA	132	T	T		57	36	21	T/	0.6316	1Del
Lib10^4_#1 100_Jm^2 U2OS Sel PCR#1	TAG_BX_AGGTGTCTTCTA	191	C	C	T	57	35	22	C/T	0.614	SNP
Lib10^4_#1 100_Jm^2 U2OS Sel PCR#1	TAG_BX_AGTACATTCCTA	126	G	G	T	26	24	2	G/T	0.9231	SNP
Lib10^4_#1 100_Jm^2 U2OS Sel PCR#1	TAG_BX_AGTATCTGTTTG	-56	G	G	A	37	37	0	G/A	1	SNP
Lib10^4_#1 100_Jm^2 U2OS Sel PCR#1	TAG_BX_AGTATCTGTTTG	5	G	G	A	37	34	3	G/A	0.9189	SNP
Lib10^4_#1 100_Jm^2 U2OS Sel PCR#1	TAG_BX_AGTATCTGTTTG	108	C	C	A	36	28	8	C/A	0.7778	SNP
Lib10^4_#1 100_Jm^2 U2OS Sel PCR#1	TAG_BX_AGTATCTGTTTG	118	G	G	A	36	4	32	G/A	0.1111	SNP
Lib10^4_#1 100_Jm^2 U2OS Sel PCR#1	TAG_BX_AGTATCTGTTTG	126	G	G	C	36	27	9	G/C	0.75	SNP
Lib10^4_#1 100_Jm^2 U2OS Sel PCR#1	TAG_BX_AGTGGTAAGTTA	85	G	G	A	60	48	11	G/A	0.8	SNP
Lib10^4_#1 100_Jm^2 U2OS Sel PCR#1	TAG_BX_AGTTTTGGAGTT	131	C	C	T	76	51	24	C/T	0.6711	SNP
Lib10^4_#1 100_Jm^2 U2OS Sel PCR#1	TAG_BX_AGTTTTGTCAAA	85	G	G	A	56	45	11	G/A	0.8036	SNP
Lib10^4_#1 100_Jm^2 U2OS Sel PCR#1	TAG_BX_AGTTTTTATCTT	118	G	G	A	43	34	9	G/A	0.7907	SNP
Lib10^4_#1 100_Jm^2 U2OS Sel PCR#1	TAG_BX_ATAAGAATGATC	118	G	G	A	47	38	7	G/A	0.8085	SNP
Lib10^4_#1 100_Jm^2 U2OS Sel PCR#1	TAG_BX_ATAATACGGTCG	118	G	G	A	40	33	6	G/A	0.825	SNP
Lib10^4_#1 100_Jm^2 U2OS Sel PCR#1	TAG_BX_ATACTATCCAAT	117	C	C	T	48	31	16	C/T	0.6458	SNP
Lib10^4_#1 100_Jm^2 U2OS Sel PCR#1	TAG_BX_ATACTATCCAAT	131	C	C	T	47	31	16	C/T	0.6596	SNP
Lib10^4_#1 100_Jm^2 U2OS Sel PCR#1	TAG_BX_ATACTCATGATT	97	A	A	C	43	38	5	A/C	0.8837	SNP
Lib10^4_#1 100_Jm^2 U2OS Sel PCR#1	TAG_BX_ATACTGATTGCT	66	G	GG	AA	36	30	4	GG/AA	0.8333	DNP
Lib10^4_#1 100_Jm^2 U2OS Sel PCR#1	TAG_BX_ATAGAGCTGCCG	118	G	G	A	55	41	11	G/A	0.7455	SNP
Lib10^4_#1 100_Jm^2 U2OS Sel PCR#1	TAG_BX_ATAGCTAATCTT	118	G	G	A	13	12	1	G/A	0.9231	SNP
Lib10^4_#1 100_Jm^2 U2OS Sel PCR#1	TAG_BX_ATAGCTTGTTAT	85	G	G	T	96	68	26	G/T	0.7083	SNP
Lib10^4_#1 100_Jm^2 U2OS Sel PCR#1	TAG_BX_ATATATGAATAA	65	G	GG	AA	71	63	7	GG/AA	0.8873	DNP
Lib10^4_#1 100_Jm^2 U2OS Sel PCR#1	TAG_BX_ATATATGAATAA	156	A	A	T	68	53	15	A/T	0.7794	SNP
Lib10^4_#1 100_Jm^2 U2OS Sel PCR#1	TAG_BX_ATATCATTGTAT	118	G	G	A	30	22	8	G/A	0.7333	SNP
Lib10^4_#1 100_Jm^2 U2OS Sel PCR#1	TAG_BX_ATATCGGTGGTA	84	G	GG	AA	73	55	17	GG/AA	0.7534	DNP
Lib10^4_#1 100_Jm^2 U2OS Sel PCR#1	TAG_BX_ATATGCTTAAGT	82	A	A	T	29	23	6	A/T	0.7931	SNP
Lib10^4_#1 100_Jm^2 U2OS Sel PCR#1	TAG_BX_ATATGCTTAAGT	112	G	G	A	29	23	6	G/A	0.7931	SNP
Lib10^4_#1 100_Jm^2 U2OS Sel PCR#1	TAG_BX_ATATGCTTAAGT	118	G	G	A	29	4	25	G/A	0.1379	SNP
Lib10^4_#1 100_Jm^2 U2OS Sel PCR#1	TAG_BX_ATATTATGCTGA	130	C	C	T	62	53	8	C/T	0.8548	SNP
Lib10^4_#1 100_Jm^2 U2OS Sel PCR#1	TAG_BX_ATCAAGTCGCAT	69	T	T	C	29	3	26	T/C	0.1034	SNP
Lib10^4_#1 100_Jm^2 U2OS Sel PCR#1	TAG_BX_ATCAAGTCGCAT	130	C	C	T	29	22	5	C/T	0.7586	SNP
Lib10^4_#1 100_Jm^2 U2OS Sel PCR#1	TAG_BX_ATCAATGTTGCT	77	G	GG	AT	77	60	13	GG/AT	0.7792	DNP
Lib10^4_#1 100_Jm^2 U2OS Sel PCR#1	TAG_BX_ATCAGAGGGAGT	66	G	GG	AA	45	36	5	GG/AA	0.8	DNP
Lib10^4_#1 100_Jm^2 U2OS Sel PCR#1	TAG_BX_ATCAGAGGGAGT	112	G	G	A	42	32	9	G/A	0.7619	SNP
Lib10^4_#1 100_Jm^2 U2OS Sel PCR#1	TAG_BX_ATCCCGCTTCGA	123	T	TTC	GTT	16	10	4	TTC/GTT	0.625	Del-In
Lib10^4_#1 100_Jm^2 U2OS Sel PCR#1	TAG_BX_ATCTCCTGCGAC	118	G	G	A	63	48	15	G/A	0.7619	SNP
Lib10^4_#1 100_Jm^2 U2OS Sel PCR#1	TAG_BX_ATCTGGTGGATA	131	C	C	T	43	32	11	C/T	0.7442	SNP
Lib10^4_#1 100_Jm^2 U2OS Sel PCR#1	TAG_BX_ATGAGAATCGGC	73	G	G	A	45	37	7	G/A	0.8222	SNP
Lib10^4_#1 100_Jm^2 U2OS Sel PCR#1	TAG_BX_ATGAGAATCGGC	117	C	C	T	45	33	12	C/T	0.7333	SNP
Lib10^4_#1 100_Jm^2 U2OS Sel PCR#1	TAG_BX_ATGAGGGCAGCT	120	A	AG	TA	51	31	11	AG/TA	0.6078	DNP
Lib10^4_#1 100_Jm^2 U2OS Sel PCR#1	TAG_BX_ATGAGGGCAGCT	120	A	A	T	51	9	11	A/T	0.1765	SNP
Lib10^4_#1 100_Jm^2 U2OS Sel PCR#1	TAG_BX_ATGAGTTGGGGT	118	G	G	A	96	79	14	G/A	0.8229	SNP
Lib10^4_#1 100_Jm^2 U2OS Sel PCR#1	TAG_BX_ATGATCACTTTT	118	G	G	A	28	3	25	G/A	0.1071	SNP
Lib10^4_#1 100_Jm^2 U2OS Sel PCR#1	TAG_BX_ATGATCACTTTT	130	C	C	G	28	19	8	C/G	0.6786	SNP
Lib10^4_#1 100_Jm^2 U2OS Sel PCR#1	TAG_BX_ATGCCCGGGGTT	121	G	G	A	114	90	23	G/A	0.7895	SNP
Lib10^4_#1 100_Jm^2 U2OS Sel PCR#1	TAG_BX_ATGCTCTTATGT	98	A	AA	TT	20	14	4	AA/TT	0.7	DNP
Lib10^4_#1 100_Jm^2 U2OS Sel PCR#1	TAG_BX_ATGCTCTTATGT	118	G	G	A	19	2	17	G/A	0.1053	SNP
Lib10^4_#1 100_Jm^2 U2OS Sel PCR#1	TAG_BX_ATGCTGGTTCAA	118	G	G	A	13	9	4	G/A	0.6923	SNP
Lib10^4_#1 100_Jm^2 U2OS Sel PCR#1	TAG_BX_ATGGCCCGCGGT	70	C	CC	TT	118	87	20	CC/TT	0.7373	DNP
Lib10^4_#1 100_Jm^2 U2OS Sel PCR#1	TAG_BX_ATGGGTAATAGG	121	G	G	A	38	27	11	G/A	0.7105	SNP
Lib10^4_#1 100_Jm^2 U2OS Sel PCR#1	TAG_BX_ATGGTTACGCTC	11	A	AT	TA	101	67	14	AT/TA	0.6634	DNP
Lib10^4_#1 100_Jm^2 U2OS Sel PCR#1	TAG_BX_ATGGTTACGCTC	11	A	A	T	101	19	14	A/T	0.1881	SNP
Lib10^4_#1 100_Jm^2 U2OS Sel PCR#1	TAG_BX_ATGGTTCTTTCC	70	C	CCC	TTA	49	32	15	CCC/TTA	0.6531	Del-In
Lib10^4_#1 100_Jm^2 U2OS Sel PCR#1	TAG_BX_ATGGTTCTTTCC	118	G	G	A	46	5	41	G/A	0.1087	SNP
Lib10^4_#1 100_Jm^2 U2OS Sel PCR#1	TAG_BX_ATGGTTGGTTGC	117	C	C	A	31	24	6	C/A	0.7742	SNP
Lib10^4_#1 100_Jm^2 U2OS Sel PCR#1	TAG_BX_ATGGTTGGTTGC	134	C	C	T	31	20	11	C/T	0.6452	SNP
Lib10^4_#1 100_Jm^2 U2OS Sel PCR#1	TAG_BX_ATGGTTGGTTGC	187	C	C	A	30	16	14	C/A	0.5333	SNP
Lib10^4_#1 100_Jm^2 U2OS Sel PCR#1	TAG_BX_ATGTAATGGTGT	118	G	G	A	181	138	40	G/A	0.7624	SNP
Lib10^4_#1 100_Jm^2 U2OS Sel PCR#1	TAG_BX_ATGTAGAGTCAG	121	G	G	A	64	52	11	G/A	0.8125	SNP
Lib10^4_#1 100_Jm^2 U2OS Sel PCR#1	TAG_BX_ATGTATTAGGTA	98	A	A	T	38	30	8	A/T	0.7895	SNP
Lib10^4_#1 100_Jm^2 U2OS Sel PCR#1	TAG_BX_ATGTGGTCCTTC	91	G	G	C	24	16	8	G/C	0.6667	SNP
Lib10^4_#1 100_Jm^2 U2OS Sel PCR#1	TAG_BX_ATGTTACAAAAG	130	C	C	A	58	44	12	C/A	0.7586	SNP
Lib10^4_#1 100_Jm^2 U2OS Sel PCR#1	TAG_BX_ATGTTCTGATTG	-27	C	C	A	31	31	0	C/A	1	SNP
Lib10^4_#1 100_Jm^2 U2OS Sel PCR#1	TAG_BX_ATGTTCTGATTG	118	G	G	A	31	25	6	G/A	0.8065	SNP
Lib10^4_#1 100_Jm^2 U2OS Sel PCR#1	TAG_BX_ATGTTTAAGGAT	118	G	GAAG	ATA	57	30	16	GAAG/ATA	0.5263	Del-In
Lib10^4_#1 100_Jm^2 U2OS Sel PCR#1	TAG_BX_ATGTTTAAGGAT	121	G	G	A	26	5	18	G/A	0.1923	SNP
Lib10^4_#1 100_Jm^2 U2OS Sel PCR#1	TAG_BX_ATGTTTAAGGAT	155	A	A	G	57	35	22	A/G	0.614	SNP
Lib10^4_#1 100_Jm^2 U2OS Sel PCR#1	TAG_BX_ATGTTTGGATTT	96	T	T	A	53	39	13	T/A	0.7358	SNP
Lib10^4_#1 100_Jm^2 U2OS Sel PCR#1	TAG_BX_ATTAGTACTGGT	118	G	G	A	63	55	7	G/A	0.873	SNP
Lib10^4_#1 100_Jm^2 U2OS Sel PCR#1	TAG_BX_ATTATTTGTTTA	5	G	G	A	25	22	3	G/A	0.88	SNP
Lib10^4_#1 100_Jm^2 U2OS Sel PCR#1	TAG_BX_ATTCGCGTTTCC	130	C	C	T	45	33	12	C/T	0.7333	SNP
Lib10^4_#1 100_Jm^2 U2OS Sel PCR#1	TAG_BX_ATTGCGAACGGA	130	C	C	T	158	121	36	C/T	0.7658	SNP
Lib10^4_#1 100_Jm^2 U2OS Sel PCR#1	TAG_BX_ATTGCTATGTAT	69	T	TCC	GTA	126	87	17	TCC/GTA	0.6905	Del-In
Lib10^4_#1 100_Jm^2 U2OS Sel PCR#1	TAG_BX_ATTGGACCTAGC	85	G	G	A	21	14	6	G/A	0.6667	SNP
Lib10^4_#1 100_Jm^2 U2OS Sel PCR#1	TAG_BX_ATTGGCTGTTTA	126	G	GA		79	58	21	GA/	0.7342	Del
Lib10^4_#1 100_Jm^2 U2OS Sel PCR#1	TAG_BX_ATTGGGCACGGG	118	G	G	A	69	57	10	G/A	0.8261	SNP
Lib10^4_#1 100_Jm^2 U2OS Sel PCR#1	TAG_BX_ATTGTCCCGTGA	64	G	GG	AA	97	77	17	GG/AA	0.7938	DNP
Lib10^4_#1 100_Jm^2 U2OS Sel PCR#1	TAG_BX_ATTGTTGCGGTT	94	T	TC	CA	17	6	5	TC/CA	0.3529	DNP
Lib10^4_#1 100_Jm^2 U2OS Sel PCR#1	TAG_BX_ATTGTTGCGGTT	94	T	T	C	17	6	5	T/C	0.3529	SNP
Lib10^4_#1 100_Jm^2 U2OS Sel PCR#1	TAG_BX_ATTTCCACGCGC	118	G	G	A	131	98	31	G/A	0.7481	SNP
Lib10^4_#1 100_Jm^2 U2OS Sel PCR#1	TAG_BX_CAAACATTTGGT	64	G	GG	AA	69	61	5	GG/AA	0.8841	DNP
Lib10^4_#1 100_Jm^2 U2OS Sel PCR#1	TAG_BX_CAACGCGATAAT	130	C	C	T	34	23	9	C/T	0.6765	SNP
Lib10^4_#1 100_Jm^2 U2OS Sel PCR#1	TAG_BX_CAACTTGGTCAT	-35	T	T		45	44	1	T/	0.9778	1Del
Lib10^4_#1 100_Jm^2 U2OS Sel PCR#1	TAG_BX_CAACTTGGTCAT	77	G	GG	AT	47	32	6	GG/AT	0.6809	DNP
Lib10^4_#1 100_Jm^2 U2OS Sel PCR#1	TAG_BX_CAACTTGGTCAT	77	G	G	A	47	5	6	G/A	0.1064	SNP
Lib10^4_#1 100_Jm^2 U2OS Sel PCR#1	TAG_BX_CAAGAACATATC	139	A	A		41	30	9	A/	0.7317	1Del
Lib10^4_#1 100_Jm^2 U2OS Sel PCR#1	TAG_BX_CAAGTCGTGGTC	5	G	G	A	74	20	54	G/A	0.2703	SNP
Lib10^4_#1 100_Jm^2 U2OS Sel PCR#1	TAG_BX_CAAGTCGTGGTC	131	C	C	T	74	44	30	C/T	0.5946	SNP
Lib10^4_#1 100_Jm^2 U2OS Sel PCR#1	TAG_BX_CAATCAATTCCA	130	C	CC	TT	63	42	10	CC/TT	0.6667	DNP
Lib10^4_#1 100_Jm^2 U2OS Sel PCR#1	TAG_BX_CAATCAATTCCA	130	C	C	T	63	11	10	C/T	0.1746	SNP
Lib10^4_#1 100_Jm^2 U2OS Sel PCR#1	TAG_BX_CAATGACGGTCT	64	G	GG	AA	72	56	11	GG/AA	0.7778	DNP
Lib10^4_#1 100_Jm^2 U2OS Sel PCR#1	TAG_BX_CACAAATTTCGG	130	C	C	T	101	78	22	C/T	0.7723	SNP
Lib10^4_#1 100_Jm^2 U2OS Sel PCR#1	TAG_BX_CACACTTGACTG	118	G	G	A	51	42	8	G/A	0.8235	SNP
Lib10^4_#1 100_Jm^2 U2OS Sel PCR#1	TAG_BX_CACCGGCGTAAG	130	C	C	T	52	39	12	C/T	0.75	SNP
Lib10^4_#1 100_Jm^2 U2OS Sel PCR#1	TAG_BX_CACCTTGGTCAG	118	G	G	A	334	256	68	G/A	0.7665	SNP
Lib10^4_#1 100_Jm^2 U2OS Sel PCR#1	TAG_BX_CACGATCTTACC	85	G	GG	AA	69	57	12	GG/AA	0.8261	DNP
Lib10^4_#1 100_Jm^2 U2OS Sel PCR#1	TAG_BX_CACGTGTCTCTG	136	C	CC	AT	197	125	28	CC/AT	0.6345	DNP
Lib10^4_#1 100_Jm^2 U2OS Sel PCR#1	TAG_BX_CACGTGTCTCTG	136	C	C	A	197	44	28	C/A	0.2234	SNP
Lib10^4_#1 100_Jm^2 U2OS Sel PCR#1	TAG_BX_CACTATACTTAT	101	C	C	A	140	109	28	C/A	0.7786	SNP
Lib10^4_#1 100_Jm^2 U2OS Sel PCR#1	TAG_BX_CACTATACTTAT	111	C	C	T	140	111	29	C/T	0.7929	SNP
Lib10^4_#1 100_Jm^2 U2OS Sel PCR#1	TAG_BX_CACTATACTTAT	117	C	C	T	140	112	28	C/T	0.8	SNP
Lib10^4_#1 100_Jm^2 U2OS Sel PCR#1	TAG_BX_CACTATACTTAT	130	C	C	T	140	105	32	C/T	0.75	SNP
Lib10^4_#1 100_Jm^2 U2OS Sel PCR#1	TAG_BX_CACTCAATGTGA	5	G	G	C	59	51	7	G/C	0.8644	SNP
Lib10^4_#1 100_Jm^2 U2OS Sel PCR#1	TAG_BX_CACTCGTGTCGC	95	C	C	T	48	41	7	C/T	0.8542	SNP
Lib10^4_#1 100_Jm^2 U2OS Sel PCR#1	TAG_BX_CACTCGTGTCGC	131	C	C	T	47	39	7	C/T	0.8298	SNP
Lib10^4_#1 100_Jm^2 U2OS Sel PCR#1	TAG_BX_CACTCTCCTCTT	121	G	GG	AA	52	32	14	GG/AA	0.6154	DNP
Lib10^4_#1 100_Jm^2 U2OS Sel PCR#1	TAG_BX_CACTCTGGTCCT	95	C	C	G	67	53	13	C/G	0.791	SNP
Lib10^4_#1 100_Jm^2 U2OS Sel PCR#1	TAG_BX_CAGCACGCCGTT	134	C	C	A	67	52	15	C/A	0.7761	SNP
Lib10^4_#1 100_Jm^2 U2OS Sel PCR#1	TAG_BX_CAGGAGAGTGCC	118	G	G	A	49	40	9	G/A	0.8163	SNP
Lib10^4_#1 100_Jm^2 U2OS Sel PCR#1	TAG_BX_CAGGCATAGCTC	85	G	G	A	47	38	9	G/A	0.8085	SNP
Lib10^4_#1 100_Jm^2 U2OS Sel PCR#1	TAG_BX_CAGGGTAAGCGC	117	C	C	A	32	26	6	C/A	0.8125	SNP
Lib10^4_#1 100_Jm^2 U2OS Sel PCR#1	TAG_BX_CAGGTTGCGTTG	121	G	G	A	32	27	5	G/A	0.8438	SNP
Lib10^4_#1 100_Jm^2 U2OS Sel PCR#1	TAG_BX_CAGTATCTAGAT	120	A	AG	CA	85	55	23	AG/CA	0.6471	DNP
Lib10^4_#1 100_Jm^2 U2OS Sel PCR#1	TAG_BX_CAGTATTTGGTT	131	C	C	G	47	29	18	C/G	0.617	SNP
Lib10^4_#1 100_Jm^2 U2OS Sel PCR#1	TAG_BX_CAGTGACAATGC	108	C	C	T	116	89	25	C/T	0.7672	SNP
Lib10^4_#1 100_Jm^2 U2OS Sel PCR#1	TAG_BX_CAGTGACAATGC	130	C	C	T	116	89	26	C/T	0.7672	SNP
Lib10^4_#1 100_Jm^2 U2OS Sel PCR#1	TAG_BX_CATAATTTGAGT	118	G	G	A	40	34	5	G/A	0.85	SNP
Lib10^4_#1 100_Jm^2 U2OS Sel PCR#1	TAG_BX_CATAGGTCGTAG	70	C	CC	TT	20	14	4	CC/TT	0.7	DNP
Lib10^4_#1 100_Jm^2 U2OS Sel PCR#1	TAG_BX_CATAGGTCGTAG	70	C	C	T	20	2	4	C/T	0.1	SNP
Lib10^4_#1 100_Jm^2 U2OS Sel PCR#1	TAG_BX_CATAGGTCGTAG	118	G	G	A	18	3	15	G/A	0.1667	SNP
Lib10^4_#1 100_Jm^2 U2OS Sel PCR#1	TAG_BX_CATAGGTCGTAG	170	C	C	A	18	2	16	C/A	0.1111	SNP
Lib10^4_#1 100_Jm^2 U2OS Sel PCR#1	TAG_BX_CATATAAGCCCT	121	G	G	A	38	29	8	G/A	0.7632	SNP
Lib10^4_#1 100_Jm^2 U2OS Sel PCR#1	TAG_BX_CATCCCTTTTTG	81	A	A	G	73	60	12	A/G	0.8219	SNP
Lib10^4_#1 100_Jm^2 U2OS Sel PCR#1	TAG_BX_CATCCCTTTTTG	88	G	G	A	73	59	11	G/A	0.8082	SNP
Lib10^4_#1 100_Jm^2 U2OS Sel PCR#1	TAG_BX_CATCCGCAGTTT	130	C	C	T	50	36	12	C/T	0.72	SNP
Lib10^4_#1 100_Jm^2 U2OS Sel PCR#1	TAG_BX_CATGCTTCGGTA	97	A	A	G	35	31	4	A/G	0.8857	SNP
Lib10^4_#1 100_Jm^2 U2OS Sel PCR#1	TAG_BX_CATTAAGTATTG	118	G	G	A	37	29	8	G/A	0.7838	SNP
Lib10^4_#1 100_Jm^2 U2OS Sel PCR#1	TAG_BX_CATTCATCGATA	73	G	GAG	AAA	46	35	7	GAG/AAA	0.7609	Del-In
Lib10^4_#1 100_Jm^2 U2OS Sel PCR#1	TAG_BX_CATTCCGTTAGC	85	G	GGA	AAT	21	13	4	GGA/AAT	0.619	Del-In
Lib10^4_#1 100_Jm^2 U2OS Sel PCR#1	TAG_BX_CATTCCGTTAGC	112	G	G	A	19	13	6	G/A	0.6842	SNP
Lib10^4_#1 100_Jm^2 U2OS Sel PCR#1	TAG_BX_CATTGCTTCAGG	120	A	AG	TA	43	34	7	AG/TA	0.7907	DNP
Lib10^4_#1 100_Jm^2 U2OS Sel PCR#1	TAG_BX_CATTGGATCGTC	-29	C	C	T	50	47	3	C/T	0.94	SNP
Lib10^4_#1 100_Jm^2 U2OS Sel PCR#1	TAG_BX_CATTGGATCGTC	130	C	C	T	49	38	10	C/T	0.7755	SNP
Lib10^4_#1 100_Jm^2 U2OS Sel PCR#1	TAG_BX_CATTGGATCGTC	190	C	CC	TT	51	31	18	CC/TT	0.6078	DNP
Lib10^4_#1 100_Jm^2 U2OS Sel PCR#1	TAG_BX_CATTGTCGTTTC	130	C	C	T	60	46	14	C/T	0.7667	SNP
Lib10^4_#1 100_Jm^2 U2OS Sel PCR#1	TAG_BX_CATTGTCGTTTC	153	C	C	T	60	45	15	C/T	0.75	SNP
Lib10^4_#1 100_Jm^2 U2OS Sel PCR#1	TAG_BX_CATTGTCTTGCC	131	C	C	T	64	49	15	C/T	0.7656	SNP
Lib10^4_#1 100_Jm^2 U2OS Sel PCR#1	TAG_BX_CATTTGAAGTTA	75	G	G	A	40	34	5	G/A	0.85	SNP
Lib10^4_#1 100_Jm^2 U2OS Sel PCR#1	TAG_BX_CATTTGAAGTTA	85	G	G	A	40	35	5	G/A	0.875	SNP
Lib10^4_#1 100_Jm^2 U2OS Sel PCR#1	TAG_BX_CCACCATTTCTC	-39	C	C	T	90	89	1	C/T	0.9889	SNP
Lib10^4_#1 100_Jm^2 U2OS Sel PCR#1	TAG_BX_CCACCATTTCTC	24	C	C	T	90	80	10	C/T	0.8889	SNP
Lib10^4_#1 100_Jm^2 U2OS Sel PCR#1	TAG_BX_CCACCATTTCTC	71	C	CC	TT	91	75	12	CC/TT	0.8242	DNP
Lib10^4_#1 100_Jm^2 U2OS Sel PCR#1	TAG_BX_CCACCATTTCTC	134	C	CC	TT	112	65	25	CC/TT	0.5804	DNP
Lib10^4_#1 100_Jm^2 U2OS Sel PCR#1	TAG_BX_CCACCATTTCTC	134	C	C	T	112	21	25	C/T	0.1875	SNP
Lib10^4_#1 100_Jm^2 U2OS Sel PCR#1	TAG_BX_CCATAGACGCGA	55	A	A	T	17	2	15	A/T	0.1176	SNP
Lib10^4_#1 100_Jm^2 U2OS Sel PCR#1	TAG_BX_CCATAGACGCGA	81	A	A	G	17	13	4	A/G	0.7647	SNP
Lib10^4_#1 100_Jm^2 U2OS Sel PCR#1	TAG_BX_CCATAGACGCGA	85	G	G	C	17	13	3	G/C	0.7647	SNP
Lib10^4_#1 100_Jm^2 U2OS Sel PCR#1	TAG_BX_CCATAGACGCGA	118	G	G	A	17	2	15	G/A	0.1176	SNP
Lib10^4_#1 100_Jm^2 U2OS Sel PCR#1	TAG_BX_CCATGAACCTGG	118	G	G	A	35	29	5	G/A	0.8286	SNP
Lib10^4_#1 100_Jm^2 U2OS Sel PCR#1	TAG_BX_CCATGTTCCATC	130	C	C	T	129	90	36	C/T	0.6977	SNP
Lib10^4_#1 100_Jm^2 U2OS Sel PCR#1	TAG_BX_CCATGTTGATTG	118	G	G	A	21	20	1	G/A	0.9524	SNP
Lib10^4_#1 100_Jm^2 U2OS Sel PCR#1	TAG_BX_CCCCGGACTGGT	131	C	C	T	30	24	6	C/T	0.8	SNP
Lib10^4_#1 100_Jm^2 U2OS Sel PCR#1	TAG_BX_CCCCTTAACGGT	8	A	A	T	282	245	37	A/T	0.8688	SNP
Lib10^4_#1 100_Jm^2 U2OS Sel PCR#1	TAG_BX_CCCGCGTCGTTT	118	G	G	A	74	55	18	G/A	0.7432	SNP
Lib10^4_#1 100_Jm^2 U2OS Sel PCR#1	TAG_BX_CCCGCGTGATAA	118	G	G	A	25	20	5	G/A	0.8	SNP
Lib10^4_#1 100_Jm^2 U2OS Sel PCR#1	TAG_BX_CCCGTGAAGCGA	71	C	C	T	124	100	22	C/T	0.8065	SNP
Lib10^4_#1 100_Jm^2 U2OS Sel PCR#1	TAG_BX_CCCGTGAAGCGA	95	C	C	T	124	96	26	C/T	0.7742	SNP
Lib10^4_#1 100_Jm^2 U2OS Sel PCR#1	TAG_BX_CCCGTGAAGCGA	101	C	C	T	124	94	27	C/T	0.7581	SNP
Lib10^4_#1 100_Jm^2 U2OS Sel PCR#1	TAG_BX_CCCGTGAAGCGA	136	C	C	T	123	92	29	C/T	0.748	SNP
Lib10^4_#1 100_Jm^2 U2OS Sel PCR#1	TAG_BX_CCGACTGTATAT	5	G	GAT	TAA	70	38	8	GAT/TAA	0.5429	Del-In
Lib10^4_#1 100_Jm^2 U2OS Sel PCR#1	TAG_BX_CCGATATAGCCT	121	G	G	A	90	67	22	G/A	0.7444	SNP
Lib10^4_#1 100_Jm^2 U2OS Sel PCR#1	TAG_BX_CCGCAGGCGCCT	95	C	C	G	29	23	5	C/G	0.7931	SNP
Lib10^4_#1 100_Jm^2 U2OS Sel PCR#1	TAG_BX_CCGCAGGCGCCT	117	C	C	T	29	24	5	C/T	0.8276	SNP
Lib10^4_#1 100_Jm^2 U2OS Sel PCR#1	TAG_BX_CCGCCTGACCTA	101	C	C	A	231	178	49	C/A	0.7706	SNP
Lib10^4_#1 100_Jm^2 U2OS Sel PCR#1	TAG_BX_CCGCGTTTCGCC	66	G	GG	AA	57	43	11	GG/AA	0.7544	DNP
Lib10^4_#1 100_Jm^2 U2OS Sel PCR#1	TAG_BX_CCGCTGTTTAAG	85	G	G	A	47	38	7	G/A	0.8085	SNP
Lib10^4_#1 100_Jm^2 U2OS Sel PCR#1	TAG_BX_CCGTAGTGGACG	130	C	C	T	28	22	6	C/T	0.7857	SNP
Lib10^4_#1 100_Jm^2 U2OS Sel PCR#1	TAG_BX_CCGTGCGCTTGA	73	G	GAG	AAA	419	303	60	GAG/AAA	0.7232	Del-In
Lib10^4_#1 100_Jm^2 U2OS Sel PCR#1	TAG_BX_CCGTGCGCTTGA	73	G	G	A	419	50	60	G/A	0.1193	SNP
Lib10^4_#1 100_Jm^2 U2OS Sel PCR#1	TAG_BX_CCGTTGGAAGGC	121	G	GG	AA	58	34	15	GG/AA	0.5862	DNP
Lib10^4_#1 100_Jm^2 U2OS Sel PCR#1	TAG_BX_CCGTTGGTTGTT	101	C	CT	GA	24	16	6	CT/GA	0.6667	DNP
Lib10^4_#1 100_Jm^2 U2OS Sel PCR#1	TAG_BX_CCTATTGTTCTT	73	G	GAG	AAA	21	15	2	GAG/AAA	0.7143	Del-In
Lib10^4_#1 100_Jm^2 U2OS Sel PCR#1	TAG_BX_CCTATTGTTCTT	73	G	G	A	21	4	2	G/A	0.1905	SNP
Lib10^4_#1 100_Jm^2 U2OS Sel PCR#1	TAG_BX_CCTCGGTTTTTA	121	G	G	A	36	29	7	G/A	0.8056	SNP
Lib10^4_#1 100_Jm^2 U2OS Sel PCR#1	TAG_BX_CCTGACTGCGCC	131	C	C	A	65	49	16	C/A	0.7538	SNP
Lib10^4_#1 100_Jm^2 U2OS Sel PCR#1	TAG_BX_CCTGCGGCCTGG	-35	T	T		89	84	4	T/	0.9438	1Del
Lib10^4_#1 100_Jm^2 U2OS Sel PCR#1	TAG_BX_CCTGCGGCCTGG	85	G	G	A	86	67	18	G/A	0.7791	SNP
Lib10^4_#1 100_Jm^2 U2OS Sel PCR#1	TAG_BX_CCTGGCCTAGTT	122	G	G	A	134	102	31	G/A	0.7612	SNP
Lib10^4_#1 100_Jm^2 U2OS Sel PCR#1	TAG_BX_CCTGTAACACAG	85	G	G	A	15	12	3	G/A	0.8	SNP
Lib10^4_#1 100_Jm^2 U2OS Sel PCR#1	TAG_BX_CCTGTAACACAG	118	G	G	A	15	2	13	G/A	0.1333	SNP
Lib10^4_#1 100_Jm^2 U2OS Sel PCR#1	TAG_BX_CCTGTCTCGTTC	85	G	GG	AA	65	54	7	GG/AA	0.8308	DNP
Lib10^4_#1 100_Jm^2 U2OS Sel PCR#1	TAG_BX_CCTGTGGCGGGT	46	A	A	T	127	107	20	A/T	0.8425	SNP
Lib10^4_#1 100_Jm^2 U2OS Sel PCR#1	TAG_BX_CCTGTGGCGGGT	82	A	A	G	127	99	25	A/G	0.7795	SNP
Lib10^4_#1 100_Jm^2 U2OS Sel PCR#1	TAG_BX_CCTGTTTTTATG	34	G	G	A	42	33	7	G/A	0.7857	SNP
Lib10^4_#1 100_Jm^2 U2OS Sel PCR#1	TAG_BX_CCTGTTTTTATG	118	G	G	A	42	33	8	G/A	0.7857	SNP
Lib10^4_#1 100_Jm^2 U2OS Sel PCR#1	TAG_BX_CCTGTTTTTATG	197	G	G	T	41	25	16	G/T	0.6098	SNP
Lib10^4_#1 100_Jm^2 U2OS Sel PCR#1	TAG_BX_CCTTGTTCCTAG	97	A	AAA	TAT	44	17	9	AAA/TAT	0.3864	Del-In
Lib10^4_#1 100_Jm^2 U2OS Sel PCR#1	TAG_BX_CCTTGTTCCTAG	97	A	A	T	44	16	9	A/T	0.3636	SNP
Lib10^4_#1 100_Jm^2 U2OS Sel PCR#1	TAG_BX_CCTTGTTCCTAG	99	A	A	T	44	17	9	A/T	0.3864	SNP
Lib10^4_#1 100_Jm^2 U2OS Sel PCR#1	TAG_BX_CCTTGTTCCTAG	118	G	G	A	44	36	7	G/A	0.8182	SNP
Lib10^4_#1 100_Jm^2 U2OS Sel PCR#1	TAG_BX_CCTTTCTACGGG	73	G	GAG	AAA	47	33	8	GAG/AAA	0.7021	Del-In
Lib10^4_#1 100_Jm^2 U2OS Sel PCR#1	TAG_BX_CCTTTCTACGGG	73	G	G	A	47	6	8	G/A	0.1277	SNP
Lib10^4_#1 100_Jm^2 U2OS Sel PCR#1	TAG_BX_CGACTGCTAGGT	118	G	G	A	13	2	11	G/A	0.1538	SNP
Lib10^4_#1 100_Jm^2 U2OS Sel PCR#1	TAG_BX_CGACTGCTAGGT	130	C	C	T	13	7	6	C/T	0.5385	SNP
Lib10^4_#1 100_Jm^2 U2OS Sel PCR#1	TAG_BX_CGAGACTGTCGT	85	G	GG	AA	38	26	10	GG/AA	0.6842	DNP
Lib10^4_#1 100_Jm^2 U2OS Sel PCR#1	TAG_BX_CGAGGGACTGAC	85	G	G	A	275	136	137	G/A	0.4945	SNP
Lib10^4_#1 100_Jm^2 U2OS Sel PCR#1	TAG_BX_CGAGGGACTGAC	118	G	G	A	275	98	176	G/A	0.3564	SNP
Lib10^4_#1 100_Jm^2 U2OS Sel PCR#1	TAG_BX_CGAGTTTGTGCT	91	G	G	C	37	30	6	G/C	0.8108	SNP
Lib10^4_#1 100_Jm^2 U2OS Sel PCR#1	TAG_BX_CGATAATAGTGG	117	C	C	T	12	10	2	C/T	0.8333	SNP
Lib10^4_#1 100_Jm^2 U2OS Sel PCR#1	TAG_BX_CGATGTTAGTGG	101	C	C	T	31	25	6	C/T	0.8065	SNP
Lib10^4_#1 100_Jm^2 U2OS Sel PCR#1	TAG_BX_CGATGTTAGTGG	130	C	C	T	31	25	6	C/T	0.8065	SNP
Lib10^4_#1 100_Jm^2 U2OS Sel PCR#1	TAG_BX_CGCCTCAGTCGG	118	G	G	A	23	15	7	G/A	0.6522	SNP
Lib10^4_#1 100_Jm^2 U2OS Sel PCR#1	TAG_BX_CGCGGACCGATC	125	C	CGAA	TGAT	118	76	25	CGAA/TGAT	0.6441	Del-In
Lib10^4_#1 100_Jm^2 U2OS Sel PCR#1	TAG_BX_CGCGGACCGATC	125	C	C	T	118	16	25	C/T	0.1356	SNP
Lib10^4_#1 100_Jm^2 U2OS Sel PCR#1	TAG_BX_CGCTAGTGTGGT	5	G	G	A	15	13	2	G/A	0.8667	SNP
Lib10^4_#1 100_Jm^2 U2OS Sel PCR#1	TAG_BX_CGCTCTCTGCTC	118	G	G	A	40	36	3	G/A	0.9	SNP
Lib10^4_#1 100_Jm^2 U2OS Sel PCR#1	TAG_BX_CGCTCTGCTGTG	91	G	G	C	31	25	5	G/C	0.8065	SNP
Lib10^4_#1 100_Jm^2 U2OS Sel PCR#1	TAG_BX_CGCTCTGCTGTG	197	G	G	A	31	24	7	G/A	0.7742	SNP
Lib10^4_#1 100_Jm^2 U2OS Sel PCR#1	TAG_BX_CGGAGCTTGGAA	121	G	G	A	62	50	11	G/A	0.8065	SNP
Lib10^4_#1 100_Jm^2 U2OS Sel PCR#1	TAG_BX_CGGATCGGGTCA	118	G	G	A	53	38	12	G/A	0.717	SNP
Lib10^4_#1 100_Jm^2 U2OS Sel PCR#1	TAG_BX_CGGATTCGATTC	118	G	G	A	49	38	11	G/A	0.7755	SNP
Lib10^4_#1 100_Jm^2 U2OS Sel PCR#1	TAG_BX_CGGCATTGATGG	118	G	G	A	24	17	6	G/A	0.7083	SNP
Lib10^4_#1 100_Jm^2 U2OS Sel PCR#1	TAG_BX_CGGCTGAAGTCT	118	G	G	A	44	37	7	G/A	0.8409	SNP
Lib10^4_#1 100_Jm^2 U2OS Sel PCR#1	TAG_BX_CGGGCCCTTCAT	118	G	G	A	67	48	17	G/A	0.7164	SNP
Lib10^4_#1 100_Jm^2 U2OS Sel PCR#1	TAG_BX_CGGGCGGATAGG	8	A	A	G	78	73	5	A/G	0.9359	SNP
Lib10^4_#1 100_Jm^2 U2OS Sel PCR#1	TAG_BX_CGGGCTTGCATC	118	G	G	A	73	58	14	G/A	0.7945	SNP
Lib10^4_#1 100_Jm^2 U2OS Sel PCR#1	TAG_BX_CGGGGGTTCGAT	77	G	GG	AA	36	26	10	GG/AA	0.7222	DNP
Lib10^4_#1 100_Jm^2 U2OS Sel PCR#1	TAG_BX_CGGGTTGAGCGG	121	G	G	A	108	84	23	G/A	0.7778	SNP
Lib10^4_#1 100_Jm^2 U2OS Sel PCR#1	TAG_BX_CGGTAGAGATAT	33	G	G	A	32	31	1	G/A	0.9688	SNP
Lib10^4_#1 100_Jm^2 U2OS Sel PCR#1	TAG_BX_CGGTAGAGATAT	91	G	G	A	32	26	4	G/A	0.8125	SNP
Lib10^4_#1 100_Jm^2 U2OS Sel PCR#1	TAG_BX_CGGTGGCACATT	118	G	G	A	110	38	71	G/A	0.3455	SNP
Lib10^4_#1 100_Jm^2 U2OS Sel PCR#1	TAG_BX_CGGTGGCACATT	130	C	C	T	109	47	62	C/T	0.4312	SNP
Lib10^4_#1 100_Jm^2 U2OS Sel PCR#1	TAG_BX_CGGTGGTCCATC	10	G	G	A	204	189	15	G/A	0.9265	SNP
Lib10^4_#1 100_Jm^2 U2OS Sel PCR#1	TAG_BX_CGGTGGTCCATC	61	G	GG	AT	208	162	36	GG/AT	0.7788	DNP
Lib10^4_#1 100_Jm^2 U2OS Sel PCR#1	TAG_BX_CGGTTTACTTTG	118	G	G	A	55	44	11	G/A	0.8	SNP
Lib10^4_#1 100_Jm^2 U2OS Sel PCR#1	TAG_BX_CGTCTAGGGATG	73	G	GAG	AAA	73	50	12	GAG/AAA	0.6849	Del-In
Lib10^4_#1 100_Jm^2 U2OS Sel PCR#1	TAG_BX_CGTCTAGGGATG	73	G	G	A	73	10	12	G/A	0.137	SNP
Lib10^4_#1 100_Jm^2 U2OS Sel PCR#1	TAG_BX_CGTCTATGTTTA	118	G	G	A	17	2	15	G/A	0.1176	SNP
Lib10^4_#1 100_Jm^2 U2OS Sel PCR#1	TAG_BX_CGTCTATGTTTA	131	C	C	T	17	13	4	C/T	0.7647	SNP
Lib10^4_#1 100_Jm^2 U2OS Sel PCR#1	TAG_BX_CGTCTCCCTGTC	125	C	C	T	88	71	17	C/T	0.8068	SNP
Lib10^4_#1 100_Jm^2 U2OS Sel PCR#1	TAG_BX_CGTCTCCCTGTC	136	C	CC	TT	112	70	17	CC/TT	0.625	DNP
Lib10^4_#1 100_Jm^2 U2OS Sel PCR#1	TAG_BX_CGTCTCCCTGTC	136	C	C	T	112	25	17	C/T	0.2232	SNP
Lib10^4_#1 100_Jm^2 U2OS Sel PCR#1	TAG_BX_CGTCTTGTTCCC	5	G	G	A	20	19	1	G/A	0.95	SNP
Lib10^4_#1 100_Jm^2 U2OS Sel PCR#1	TAG_BX_CGTCTTTTACCG	117	C	C	T	65	44	19	C/T	0.6769	SNP
Lib10^4_#1 100_Jm^2 U2OS Sel PCR#1	TAG_BX_CGTCTTTTACCG	125	C	C	A	65	45	19	C/A	0.6923	SNP
Lib10^4_#1 100_Jm^2 U2OS Sel PCR#1	TAG_BX_CGTGAGTGTGCC	5	G	G	C	27	23	4	G/C	0.8519	SNP
Lib10^4_#1 100_Jm^2 U2OS Sel PCR#1	TAG_BX_CGTGCCGCGATT	98	A	A	T	25	20	5	A/T	0.8	SNP
Lib10^4_#1 100_Jm^2 U2OS Sel PCR#1	TAG_BX_CGTGGTCTACCA	-16	T	TT	AA	157	74	78	TT/AA	0.4713	DNP
Lib10^4_#1 100_Jm^2 U2OS Sel PCR#1	TAG_BX_CGTGGTCTACCA	130	C	C	T	148	58	90	C/T	0.3919	SNP
Lib10^4_#1 100_Jm^2 U2OS Sel PCR#1	TAG_BX_CGTGGTTGGCTG	71	C	C	A	32	23	7	C/A	0.7188	SNP
Lib10^4_#1 100_Jm^2 U2OS Sel PCR#1	TAG_BX_CGTTTGTCTGCG	118	G	G	A	25	18	6	G/A	0.72	SNP
Lib10^4_#1 100_Jm^2 U2OS Sel PCR#1	TAG_BX_CGTTTTGTGGTA	130	C	C	T	95	66	27	C/T	0.6947	SNP
Lib10^4_#1 100_Jm^2 U2OS Sel PCR#1	TAG_BX_CGTTTTTTCACG	5	G	GAT	TAA	50	42	1	GAT/TAA	0.84	Del-In
Lib10^4_#1 100_Jm^2 U2OS Sel PCR#1	TAG_BX_CGTTTTTTCACG	5	G	G	T	50	7	1	G/T	0.14	SNP
Lib10^4_#1 100_Jm^2 U2OS Sel PCR#1	TAG_BX_CTAAAATCCCAT	118	G	G	A	55	37	18	G/A	0.6727	SNP
Lib10^4_#1 100_Jm^2 U2OS Sel PCR#1	TAG_BX_CTACAATTTCTC	118	G	G	A	76	64	12	G/A	0.8421	SNP
Lib10^4_#1 100_Jm^2 U2OS Sel PCR#1	TAG_BX_CTACAGTGCTGA	121	G	G	A	60	51	8	G/A	0.85	SNP
Lib10^4_#1 100_Jm^2 U2OS Sel PCR#1	TAG_BX_CTACGATGGTTT	85	G	G		27	22	5	G/	0.8148	1Del
Lib10^4_#1 100_Jm^2 U2OS Sel PCR#1	TAG_BX_CTACGATGGTTT	91	G	G	A	27	21	5	G/A	0.7778	SNP
Lib10^4_#1 100_Jm^2 U2OS Sel PCR#1	TAG_BX_CTACTCATGATC	118	G	G	A	98	80	15	G/A	0.8163	SNP
Lib10^4_#1 100_Jm^2 U2OS Sel PCR#1	TAG_BX_CTATGGTCCCTA	122	G	GT	AA	87	64	13	GT/AA	0.7356	DNP
Lib10^4_#1 100_Jm^2 U2OS Sel PCR#1	TAG_BX_CTATGGTCCCTA	122	G	G	A	87	10	13	G/A	0.1149	SNP
Lib10^4_#1 100_Jm^2 U2OS Sel PCR#1	TAG_BX_CTCATGTTAATA	121	G	G	A	41	32	9	G/A	0.7805	SNP
Lib10^4_#1 100_Jm^2 U2OS Sel PCR#1	TAG_BX_CTCCCTTACTTT	118	G	G	A	15	14	1	G/A	0.9333	SNP
Lib10^4_#1 100_Jm^2 U2OS Sel PCR#1	TAG_BX_CTCCGCTATTTT	118	G	G	A	30	23	7	G/A	0.7667	SNP
Lib10^4_#1 100_Jm^2 U2OS Sel PCR#1	TAG_BX_CTCGATGTTTAC	130	C	CC	TT	41	32	6	CC/TT	0.7805	DNP
Lib10^4_#1 100_Jm^2 U2OS Sel PCR#1	TAG_BX_CTCGGCCCGCGT	118	G	G	A	64	49	13	G/A	0.7656	SNP
Lib10^4_#1 100_Jm^2 U2OS Sel PCR#1	TAG_BX_CTCGTGATGCGC	95	C	CT	TTA	104	66	100	CT/TTA	0.6346	Del-In
Lib10^4_#1 100_Jm^2 U2OS Sel PCR#1	TAG_BX_CTCGTGATGCGC	101	C	C	A	104	76	28	C/A	0.7308	SNP
Lib10^4_#1 100_Jm^2 U2OS Sel PCR#1	TAG_BX_CTCTCGTTGATC	67	G	GT	AA	214	158	39	GT/AA	0.7383	DNP
Lib10^4_#1 100_Jm^2 U2OS Sel PCR#1	TAG_BX_CTCTTACTTGGA	118	G	G	A	84	65	19	G/A	0.7738	SNP
Lib10^4_#1 100_Jm^2 U2OS Sel PCR#1	TAG_BX_CTCTTTGCCTGT	121	G	G	A	109	84	23	G/A	0.7706	SNP
Lib10^4_#1 100_Jm^2 U2OS Sel PCR#1	TAG_BX_CTGAATGGATTT	118	G	G	A	31	23	8	G/A	0.7419	SNP
Lib10^4_#1 100_Jm^2 U2OS Sel PCR#1	TAG_BX_CTGACCGTGAGA	121	G	G	A	58	45	13	G/A	0.7759	SNP
Lib10^4_#1 100_Jm^2 U2OS Sel PCR#1	TAG_BX_CTGACGTCTTCG	118	G	G	A	229	44	184	G/A	0.1921	SNP
Lib10^4_#1 100_Jm^2 U2OS Sel PCR#1	TAG_BX_CTGACGTCTTCG	123	T	T	C	229	142	86	T/C	0.6201	SNP
Lib10^4_#1 100_Jm^2 U2OS Sel PCR#1	TAG_BX_CTGAGGTATACG	131	C	C	T	58	39	17	C/T	0.6724	SNP
Lib10^4_#1 100_Jm^2 U2OS Sel PCR#1	TAG_BX_CTGCTTTTCTGA	83	A	AG	GA	307	215	76	AG/GA	0.7003	DNP
Lib10^4_#1 100_Jm^2 U2OS Sel PCR#1	TAG_BX_CTGGGTGACTTT	131	C	C	A	42	35	7	C/A	0.8333	SNP
Lib10^4_#1 100_Jm^2 U2OS Sel PCR#1	TAG_BX_CTGGTATCAATT	121	G	G	A	212	162	49	G/A	0.7642	SNP
Lib10^4_#1 100_Jm^2 U2OS Sel PCR#1	TAG_BX_CTGGTATCAATT	197	G	G	A	211	139	70	G/A	0.6588	SNP
Lib10^4_#1 100_Jm^2 U2OS Sel PCR#1	TAG_BX_CTGGTGAGCGCA	118	G	G	A	151	121	28	G/A	0.8013	SNP
Lib10^4_#1 100_Jm^2 U2OS Sel PCR#1	TAG_BX_CTGGTGCCTTAT	26	C	C	T	41	32	9	C/T	0.7805	SNP
Lib10^4_#1 100_Jm^2 U2OS Sel PCR#1	TAG_BX_CTGGTGCCTTAT	56	C	CC	TT	43	29	10	CC/TT	0.6744	DNP
Lib10^4_#1 100_Jm^2 U2OS Sel PCR#1	TAG_BX_CTGGTGCCTTAT	95	C	C	G	41	30	10	C/G	0.7317	SNP
Lib10^4_#1 100_Jm^2 U2OS Sel PCR#1	TAG_BX_CTGGTGCCTTAT	125	C	C	G	41	30	10	C/G	0.7317	SNP
Lib10^4_#1 100_Jm^2 U2OS Sel PCR#1	TAG_BX_CTGGTGCGGGGG	131	C	C	A	66	47	18	C/A	0.7121	SNP
Lib10^4_#1 100_Jm^2 U2OS Sel PCR#1	TAG_BX_CTGGTGTGAATC	130	C	C	T	76	49	24	C/T	0.6447	SNP
Lib10^4_#1 100_Jm^2 U2OS Sel PCR#1	TAG_BX_CTGTCATCTGCT	118	G	G	A	40	26	13	G/A	0.65	SNP
Lib10^4_#1 100_Jm^2 U2OS Sel PCR#1	TAG_BX_CTTATTTGTCCA	118	G	G	A	287	220	65	G/A	0.7666	SNP
Lib10^4_#1 100_Jm^2 U2OS Sel PCR#1	TAG_BX_CTTCGGCCTCCG	126	G	G	T	25	18	7	G/T	0.72	SNP
Lib10^4_#1 100_Jm^2 U2OS Sel PCR#1	TAG_BX_CTTCGTTTTTGC	95	C	C	G	36	32	3	C/G	0.8889	SNP
Lib10^4_#1 100_Jm^2 U2OS Sel PCR#1	TAG_BX_CTTCTGAAACTT	62	G	G	T	98	79	19	G/T	0.8061	SNP
Lib10^4_#1 100_Jm^2 U2OS Sel PCR#1	TAG_BX_CTTCTGAAACTT	84	G	G	A	98	79	18	G/A	0.8061	SNP
Lib10^4_#1 100_Jm^2 U2OS Sel PCR#1	TAG_BX_CTTCTGAAACTT	135	C	C	T	97	72	23	C/T	0.7423	SNP
Lib10^4_#1 100_Jm^2 U2OS Sel PCR#1	TAG_BX_CTTCTGTGTTCC	130	C	C	T	56	37	17	C/T	0.6607	SNP
Lib10^4_#1 100_Jm^2 U2OS Sel PCR#1	TAG_BX_CTTCTTCGTGTT	126	G	G	T	44	35	9	G/T	0.7955	SNP
Lib10^4_#1 100_Jm^2 U2OS Sel PCR#1	TAG_BX_CTTGAAGTGTTA	85	G	G	A	59	51	8	G/A	0.8644	SNP
Lib10^4_#1 100_Jm^2 U2OS Sel PCR#1	TAG_BX_CTTGATTAGTCG	117	C	C	A	20	13	6	C/A	0.65	SNP
Lib10^4_#1 100_Jm^2 U2OS Sel PCR#1	TAG_BX_CTTGCTCAGTGG	118	G	G	A	302	237	58	G/A	0.7848	SNP
Lib10^4_#1 100_Jm^2 U2OS Sel PCR#1	TAG_BX_CTTGGACTATGG	83	A	AG	TA	26	22	4	AG/TA	0.8462	DNP
Lib10^4_#1 100_Jm^2 U2OS Sel PCR#1	TAG_BX_CTTGGCTAGTTT	122	G	G	A	45	39	6	G/A	0.8667	SNP
Lib10^4_#1 100_Jm^2 U2OS Sel PCR#1	TAG_BX_CTTGGGTGGGAC	70	C	C	T	42	36	6	C/T	0.8571	SNP
Lib10^4_#1 100_Jm^2 U2OS Sel PCR#1	TAG_BX_CTTGGGTGGGAC	89	C	C	T	42	35	6	C/T	0.8333	SNP
Lib10^4_#1 100_Jm^2 U2OS Sel PCR#1	TAG_BX_CTTGGGTGGGAC	101	C	C	A	42	35	6	C/A	0.8333	SNP
Lib10^4_#1 100_Jm^2 U2OS Sel PCR#1	TAG_BX_CTTGGGTGGGAC	111	C	C	A	42	36	6	C/A	0.8571	SNP
Lib10^4_#1 100_Jm^2 U2OS Sel PCR#1	TAG_BX_CTTGGTTGTTTT	5	G	G	A	14	12	2	G/A	0.8571	SNP
Lib10^4_#1 100_Jm^2 U2OS Sel PCR#1	TAG_BX_CTTGTCGTCAGC	85	G	G	A	62	53	9	G/A	0.8548	SNP
Lib10^4_#1 100_Jm^2 U2OS Sel PCR#1	TAG_BX_CTTGTGACTTGA	118	G	G	A	78	62	16	G/A	0.7949	SNP
Lib10^4_#1 100_Jm^2 U2OS Sel PCR#1	TAG_BX_CTTGTTGCTTCT	118	G	G	A	32	28	4	G/A	0.875	SNP
Lib10^4_#1 100_Jm^2 U2OS Sel PCR#1	TAG_BX_CTTTCTATTTTT	64	G	GG	TT	43	38	4	GG/TT	0.8837	DNP
Lib10^4_#1 100_Jm^2 U2OS Sel PCR#1	TAG_BX_CTTTTGTAGAAT	130	C	CC	TT	139	95	22	CC/TT	0.6835	DNP
Lib10^4_#1 100_Jm^2 U2OS Sel PCR#1	TAG_BX_CTTTTGTAGAAT	130	C	C	T	139	22	22	C/T	0.1583	SNP
Lib10^4_#1 100_Jm^2 U2OS Sel PCR#1	TAG_BX_GAAATTACATTA	69	T	T	C	37	5	31	T/C	0.1351	SNP
Lib10^4_#1 100_Jm^2 U2OS Sel PCR#1	TAG_BX_GAAATTACATTA	121	G	G	A	37	28	8	G/A	0.7568	SNP
Lib10^4_#1 100_Jm^2 U2OS Sel PCR#1	TAG_BX_GAAATTCAGGTA	131	C	C	T	95	77	15	C/T	0.8105	SNP
Lib10^4_#1 100_Jm^2 U2OS Sel PCR#1	TAG_BX_GAACAATTCGGC	64	G	GGG	ATA	21	19	1	GGG/ATA	0.9048	Del-In
Lib10^4_#1 100_Jm^2 U2OS Sel PCR#1	TAG_BX_GAACCATTTGTC	118	G	G	A	26	3	23	G/A	0.1154	SNP
Lib10^4_#1 100_Jm^2 U2OS Sel PCR#1	TAG_BX_GAACCATTTGTC	121	G	G	A	26	21	5	G/A	0.8077	SNP
Lib10^4_#1 100_Jm^2 U2OS Sel PCR#1	TAG_BX_GAAGTATGTCCC	121	G	G	A	57	46	11	G/A	0.807	SNP
Lib10^4_#1 100_Jm^2 U2OS Sel PCR#1	TAG_BX_GAAGTGTTCGTG	121	G	G	A	23	20	3	G/A	0.8696	SNP
Lib10^4_#1 100_Jm^2 U2OS Sel PCR#1	TAG_BX_GACATATCATTG	118	G	G	A	34	31	3	G/A	0.9118	SNP
Lib10^4_#1 100_Jm^2 U2OS Sel PCR#1	TAG_BX_GACCTTGCTTGT	32	G	G	A	187	21	164	G/A	0.1123	SNP
Lib10^4_#1 100_Jm^2 U2OS Sel PCR#1	TAG_BX_GACCTTGCTTGT	85	G	G	A	187	19	167	G/A	0.1016	SNP
Lib10^4_#1 100_Jm^2 U2OS Sel PCR#1	TAG_BX_GACCTTGCTTGT	118	G	G	A	187	131	53	G/A	0.7005	SNP
Lib10^4_#1 100_Jm^2 U2OS Sel PCR#1	TAG_BX_GACGCTTTGTTG	5	G	G	A	21	19	2	G/A	0.9048	SNP
Lib10^4_#1 100_Jm^2 U2OS Sel PCR#1	TAG_BX_GACGGTCTGGAT	8	A	A	T	290	49	241	A/T	0.169	SNP
Lib10^4_#1 100_Jm^2 U2OS Sel PCR#1	TAG_BX_GACGGTCTGGAT	85	G	G	A	289	200	87	G/A	0.692	SNP
Lib10^4_#1 100_Jm^2 U2OS Sel PCR#1	TAG_BX_GACTAGTGGAGT	131	C	C	T	57	48	9	C/T	0.8421	SNP
Lib10^4_#1 100_Jm^2 U2OS Sel PCR#1	TAG_BX_GACTGCCCAACA	118	G	G	A	44	34	10	G/A	0.7727	SNP
Lib10^4_#1 100_Jm^2 U2OS Sel PCR#1	TAG_BX_GAGAACTAGTTA	73	G	GAG	AAA	57	43	7	GAG/AAA	0.7544	Del-In
Lib10^4_#1 100_Jm^2 U2OS Sel PCR#1	TAG_BX_GAGAACTAGTTA	73	G	G	A	57	6	7	G/A	0.1053	SNP
Lib10^4_#1 100_Jm^2 U2OS Sel PCR#1	TAG_BX_GAGAACTAGTTA	86	G	G	A	51	41	8	G/A	0.8039	SNP
Lib10^4_#1 100_Jm^2 U2OS Sel PCR#1	TAG_BX_GAGAACTAGTTA	118	G	G	A	51	6	45	G/A	0.1176	SNP
Lib10^4_#1 100_Jm^2 U2OS Sel PCR#1	TAG_BX_GAGAGTACACCA	69	T	T	C	26	3	23	T/C	0.1154	SNP
Lib10^4_#1 100_Jm^2 U2OS Sel PCR#1	TAG_BX_GAGAGTACACCA	125	C	C	T	26	17	8	C/T	0.6538	SNP
Lib10^4_#1 100_Jm^2 U2OS Sel PCR#1	TAG_BX_GAGAGTACACCA	130	C	C	T	26	18	8	C/T	0.6923	SNP
Lib10^4_#1 100_Jm^2 U2OS Sel PCR#1	TAG_BX_GAGATAAGAATG	134	C	C	A	60	45	14	C/A	0.75	SNP
Lib10^4_#1 100_Jm^2 U2OS Sel PCR#1	TAG_BX_GAGATGAGTGCT	5	G	G	A	18	13	5	G/A	0.7222	SNP
Lib10^4_#1 100_Jm^2 U2OS Sel PCR#1	TAG_BX_GAGATTTGCGGG	118	G	G	A	79	59	19	G/A	0.7468	SNP
Lib10^4_#1 100_Jm^2 U2OS Sel PCR#1	TAG_BX_GAGCCTGGGTTT	118	G	G	A	87	66	19	G/A	0.7586	SNP
Lib10^4_#1 100_Jm^2 U2OS Sel PCR#1	TAG_BX_GAGGGGTTGGAG	118	G	G	A	77	64	12	G/A	0.8312	SNP
Lib10^4_#1 100_Jm^2 U2OS Sel PCR#1	TAG_BX_GAGGTAGTTTCC	34	G	G	T	38	29	9	G/T	0.7632	SNP
Lib10^4_#1 100_Jm^2 U2OS Sel PCR#1	TAG_BX_GAGGTAGTTTCC	97	A	A	G	38	27	11	A/G	0.7105	SNP
Lib10^4_#1 100_Jm^2 U2OS Sel PCR#1	TAG_BX_GAGGTATGGTTT	5	G	G	C	41	36	5	G/C	0.878	SNP
Lib10^4_#1 100_Jm^2 U2OS Sel PCR#1	TAG_BX_GAGTCATTTTTT	69	T	T	C	25	4	21	T/C	0.16	SNP
Lib10^4_#1 100_Jm^2 U2OS Sel PCR#1	TAG_BX_GAGTCATTTTTT	85	G	G	A	25	20	5	G/A	0.8	SNP
Lib10^4_#1 100_Jm^2 U2OS Sel PCR#1	TAG_BX_GAGTCCTTTTAA	71	C	C		34	29	4	C/	0.8529	1Del
Lib10^4_#1 100_Jm^2 U2OS Sel PCR#1	TAG_BX_GAGTCTCAGACG	-9	C	C	CGGCGCGTCATTTGAT	41	27	14	C/CGGCGCGTCATTTGAT	0.6585	Ins
Lib10^4_#1 100_Jm^2 U2OS Sel PCR#1	TAG_BX_GAGTGCCCGGAT	112	G	GAC	AAA	278	190	43	GAC/AAA	0.6835	Del-In
Lib10^4_#1 100_Jm^2 U2OS Sel PCR#1	TAG_BX_GAGTGCCCGGAT	112	G	G	A	278	43	43	G/A	0.1547	SNP
Lib10^4_#1 100_Jm^2 U2OS Sel PCR#1	TAG_BX_GAGTTGGATGAG	85	G	G	A	102	85	16	G/A	0.8333	SNP
Lib10^4_#1 100_Jm^2 U2OS Sel PCR#1	TAG_BX_GAGTTTCCAGCG	69	T	T	C	42	5	37	T/C	0.119	SNP
Lib10^4_#1 100_Jm^2 U2OS Sel PCR#1	TAG_BX_GAGTTTCCAGCG	118	G	G	A	42	34	7	G/A	0.8095	SNP
Lib10^4_#1 100_Jm^2 U2OS Sel PCR#1	TAG_BX_GATAAGCTTTTG	85	G	G	A	77	63	13	G/A	0.8182	SNP
Lib10^4_#1 100_Jm^2 U2OS Sel PCR#1	TAG_BX_GATAGGTGAGGG	5	G	G	A	36	34	2	G/A	0.9444	SNP
Lib10^4_#1 100_Jm^2 U2OS Sel PCR#1	TAG_BX_GATATGATCTCA	118	G	G	A	93	74	16	G/A	0.7957	SNP
Lib10^4_#1 100_Jm^2 U2OS Sel PCR#1	TAG_BX_GATATTACCGCG	118	G	G	A	67	47	15	G/A	0.7015	SNP
Lib10^4_#1 100_Jm^2 U2OS Sel PCR#1	TAG_BX_GATATTTGGCTG	5	G	G	A	19	17	2	G/A	0.8947	SNP
Lib10^4_#1 100_Jm^2 U2OS Sel PCR#1	TAG_BX_GATCAGGTGCTT	118	G	G	A	47	36	10	G/A	0.766	SNP
Lib10^4_#1 100_Jm^2 U2OS Sel PCR#1	TAG_BX_GATCCCGATTGG	126	G	G	C	22	17	5	G/C	0.7727	SNP
Lib10^4_#1 100_Jm^2 U2OS Sel PCR#1	TAG_BX_GATCGTTCTAAG	55	A	A	C	28	3	25	A/C	0.1071	SNP
Lib10^4_#1 100_Jm^2 U2OS Sel PCR#1	TAG_BX_GATCGTTCTAAG	84	G	GG	AA	29	19	8	GG/AA	0.6552	DNP
Lib10^4_#1 100_Jm^2 U2OS Sel PCR#1	TAG_BX_GATCTTCTTTGG	117	C	C	T	16	11	5	C/T	0.6875	SNP
Lib10^4_#1 100_Jm^2 U2OS Sel PCR#1	TAG_BX_GATCTTCTTTGG	118	G	G	A	16	4	12	G/A	0.25	SNP
Lib10^4_#1 100_Jm^2 U2OS Sel PCR#1	TAG_BX_GATGAGATCGTT	101	C	C	G	51	38	12	C/G	0.7451	SNP
Lib10^4_#1 100_Jm^2 U2OS Sel PCR#1	TAG_BX_GATGAGATCGTT	153	C	C	T	51	36	14	C/T	0.7059	SNP
Lib10^4_#1 100_Jm^2 U2OS Sel PCR#1	TAG_BX_GATGAGCTAAAT	118	G	G	A	417	335	74	G/A	0.8034	SNP
Lib10^4_#1 100_Jm^2 U2OS Sel PCR#1	TAG_BX_GATGAGCTAAAT	167	G	G	A	416	294	122	G/A	0.7067	SNP
Lib10^4_#1 100_Jm^2 U2OS Sel PCR#1	TAG_BX_GATGCTTGGGTT	112	G	GAC	AAA	460	301	86	GAC/AAA	0.6543	Del-In
Lib10^4_#1 100_Jm^2 U2OS Sel PCR#1	TAG_BX_GATGCTTGGGTT	112	G	G	A	460	69	86	G/A	0.15	SNP
Lib10^4_#1 100_Jm^2 U2OS Sel PCR#1	TAG_BX_GATGTGATAAGT	130	C	C	T	98	72	25	C/T	0.7347	SNP
Lib10^4_#1 100_Jm^2 U2OS Sel PCR#1	TAG_BX_GATGTGTAGGGA	-17	C	CT	TA	261	239	10	CT/TA	0.9157	DNP
Lib10^4_#1 100_Jm^2 U2OS Sel PCR#1	TAG_BX_GATGTGTAGGGA	95	C	C	G	246	192	51	C/G	0.7805	SNP
Lib10^4_#1 100_Jm^2 U2OS Sel PCR#1	TAG_BX_GATTATTCACTT	130	C	C	T	63	47	15	C/T	0.746	SNP
Lib10^4_#1 100_Jm^2 U2OS Sel PCR#1	TAG_BX_GATTCGAGGAGG	70	C	CCC	TTT	126	94	24	CCC/TTT	0.746	Del-In
Lib10^4_#1 100_Jm^2 U2OS Sel PCR#1	TAG_BX_GATTCGTCCACC	122	G	G	A	94	74	20	G/A	0.7872	SNP
Lib10^4_#1 100_Jm^2 U2OS Sel PCR#1	TAG_BX_GATTTCTGATGT	-27	C	C	T	21	17	4	C/T	0.8095	SNP
Lib10^4_#1 100_Jm^2 U2OS Sel PCR#1	TAG_BX_GATTTCTGATGT	5	G	G	A	21	15	6	G/A	0.7143	SNP
Lib10^4_#1 100_Jm^2 U2OS Sel PCR#1	TAG_BX_GATTTCTGATGT	117	C	C	T	21	4	17	C/T	0.1905	SNP
Lib10^4_#1 100_Jm^2 U2OS Sel PCR#1	TAG_BX_GATTTGTTCATA	130	C	C	T	69	46	23	C/T	0.6667	SNP
Lib10^4_#1 100_Jm^2 U2OS Sel PCR#1	TAG_BX_GCACATATCCGT	70	C	C	T	154	121	32	C/T	0.7857	SNP
Lib10^4_#1 100_Jm^2 U2OS Sel PCR#1	TAG_BX_GCACATATCCGT	89	C	C	T	154	118	33	C/T	0.7662	SNP
Lib10^4_#1 100_Jm^2 U2OS Sel PCR#1	TAG_BX_GCACATCGTCTA	72	C	C	T	270	211	56	C/T	0.7815	SNP
Lib10^4_#1 100_Jm^2 U2OS Sel PCR#1	TAG_BX_GCACATCGTCTA	117	C	C	T	270	199	69	C/T	0.737	SNP
Lib10^4_#1 100_Jm^2 U2OS Sel PCR#1	TAG_BX_GCACGTTTTGGA	5	G	G	A	17	16	1	G/A	0.9412	SNP
Lib10^4_#1 100_Jm^2 U2OS Sel PCR#1	TAG_BX_GCAGCTCGCATT	118	G	G	A	36	32	4	G/A	0.8889	SNP
Lib10^4_#1 100_Jm^2 U2OS Sel PCR#1	TAG_BX_GCAGGCTATAGA	121	G	G	A	471	367	103	G/A	0.7792	SNP
Lib10^4_#1 100_Jm^2 U2OS Sel PCR#1	TAG_BX_GCAGGGGTATGT	115	T	TTC	CTT	41	25	9	TTC/CTT	0.6098	Del-In
Lib10^4_#1 100_Jm^2 U2OS Sel PCR#1	TAG_BX_GCAGGGGTATGT	115	T	T	C	41	7	9	T/C	0.1707	SNP
Lib10^4_#1 100_Jm^2 U2OS Sel PCR#1	TAG_BX_GCAGGGGTATGT	118	G	G	A	33	4	29	G/A	0.1212	SNP
Lib10^4_#1 100_Jm^2 U2OS Sel PCR#1	TAG_BX_GCAGTTGGATTG	131	C	C	T	76	58	16	C/T	0.7632	SNP
Lib10^4_#1 100_Jm^2 U2OS Sel PCR#1	TAG_BX_GCAGTTTCATCG	5	G	G	A	17	16	1	G/A	0.9412	SNP
Lib10^4_#1 100_Jm^2 U2OS Sel PCR#1	TAG_BX_GCATAATATTTA	76	C	C	G	148	123	23	C/G	0.8311	SNP
Lib10^4_#1 100_Jm^2 U2OS Sel PCR#1	TAG_BX_GCATAATATTTA	122	G	GTTC	ATTA	162	113	31	GTTC/ATTA	0.6975	Del-In
Lib10^4_#1 100_Jm^2 U2OS Sel PCR#1	TAG_BX_GCATAATATTTA	122	G	G	A	162	17	31	G/A	0.1049	SNP
Lib10^4_#1 100_Jm^2 U2OS Sel PCR#1	TAG_BX_GCATAGTGATTC	85	G	G	A	36	30	5	G/A	0.8333	SNP
Lib10^4_#1 100_Jm^2 U2OS Sel PCR#1	TAG_BX_GCATTGGAACGC	130	C	C	T	23	16	7	C/T	0.6957	SNP
Lib10^4_#1 100_Jm^2 U2OS Sel PCR#1	TAG_BX_GCATTGGAACGC	153	C	C	T	23	18	5	C/T	0.7826	SNP
Lib10^4_#1 100_Jm^2 U2OS Sel PCR#1	TAG_BX_GCATTTTGTTGT	95	C	C	G	33	26	7	C/G	0.7879	SNP
Lib10^4_#1 100_Jm^2 U2OS Sel PCR#1	TAG_BX_GCCACCCGGATC	134	C	C	G	71	55	16	C/G	0.7746	SNP
Lib10^4_#1 100_Jm^2 U2OS Sel PCR#1	TAG_BX_GCCCCAACCCGA	129	T	TC	AT	85	46	22	TC/AT	0.5412	DNP
Lib10^4_#1 100_Jm^2 U2OS Sel PCR#1	TAG_BX_GCCCCAACCCGA	129	T	T	A	85	13	22	T/A	0.1529	SNP
Lib10^4_#1 100_Jm^2 U2OS Sel PCR#1	TAG_BX_GCCCCAACCCGA	134	C	C	T	71	46	23	C/T	0.6479	SNP
Lib10^4_#1 100_Jm^2 U2OS Sel PCR#1	TAG_BX_GCCCGTATTTAT	121	G	G	A	35	27	8	G/A	0.7714	SNP
Lib10^4_#1 100_Jm^2 U2OS Sel PCR#1	TAG_BX_GCCGGGTAGAGG	-55	A	A		38	37	0	A/	0.9737	1Del
Lib10^4_#1 100_Jm^2 U2OS Sel PCR#1	TAG_BX_GCCGGGTAGAGG	131	C	C	A	38	24	11	C/A	0.6316	SNP
Lib10^4_#1 100_Jm^2 U2OS Sel PCR#1	TAG_BX_GCGACATGGGTG	130	C	C	T	145	105	40	C/T	0.7241	SNP
Lib10^4_#1 100_Jm^2 U2OS Sel PCR#1	TAG_BX_GCGACGTTCATA	118	G	G	A	24	23	1	G/A	0.9583	SNP
Lib10^4_#1 100_Jm^2 U2OS Sel PCR#1	TAG_BX_GCGAGCCGATAT	130	C	C	T	50	37	13	C/T	0.74	SNP
Lib10^4_#1 100_Jm^2 U2OS Sel PCR#1	TAG_BX_GCGAGTGGGTTC	64	G	GG	TT	109	87	20	GG/TT	0.7982	DNP
Lib10^4_#1 100_Jm^2 U2OS Sel PCR#1	TAG_BX_GCGGGGAGAGTT	130	C	C	T	83	71	12	C/T	0.8554	SNP
Lib10^4_#1 100_Jm^2 U2OS Sel PCR#1	TAG_BX_GCGGGGGAAATG	118	G	G	A	36	25	11	G/A	0.6944	SNP
Lib10^4_#1 100_Jm^2 U2OS Sel PCR#1	TAG_BX_GCGGGTTGGCTG	130	C	C	T	46	34	12	C/T	0.7391	SNP
Lib10^4_#1 100_Jm^2 U2OS Sel PCR#1	TAG_BX_GCGGTATGGCGT	131	C	C	T	12	4	8	C/T	0.3333	SNP
Lib10^4_#1 100_Jm^2 U2OS Sel PCR#1	TAG_BX_GCGTACGCAATT	121	G	GG	AA	130	84	24	GG/AA	0.6462	DNP
Lib10^4_#1 100_Jm^2 U2OS Sel PCR#1	TAG_BX_GCGTTGAGGGAG	121	G	G	A	149	118	29	G/A	0.7919	SNP
Lib10^4_#1 100_Jm^2 U2OS Sel PCR#1	TAG_BX_GCGTTGGTTCTT	85	G	G	A	150	119	27	G/A	0.7933	SNP
Lib10^4_#1 100_Jm^2 U2OS Sel PCR#1	TAG_BX_GCGTTTTTGCGG	118	G	G	A	56	45	11	G/A	0.8036	SNP
Lib10^4_#1 100_Jm^2 U2OS Sel PCR#1	TAG_BX_GCTAAACTGATG	118	G	G	A	104	81	20	G/A	0.7788	SNP
Lib10^4_#1 100_Jm^2 U2OS Sel PCR#1	TAG_BX_GCTAATAGAGTA	5	G	G	A	53	51	2	G/A	0.9623	SNP
Lib10^4_#1 100_Jm^2 U2OS Sel PCR#1	TAG_BX_GCTACTCCTCCT	7	T	T	C	47	40	5	T/C	0.8511	SNP
Lib10^4_#1 100_Jm^2 U2OS Sel PCR#1	TAG_BX_GCTAGGCTCGCC	73	G	GAG	TAA	93	61	21	GAG/TAA	0.6559	Del-In
Lib10^4_#1 100_Jm^2 U2OS Sel PCR#1	TAG_BX_GCTAGGCTCGCC	73	G	G	T	93	10	21	G/T	0.1075	SNP
Lib10^4_#1 100_Jm^2 U2OS Sel PCR#1	TAG_BX_GCTAGGCTCGCC	118	G	G	A	84	12	72	G/A	0.1429	SNP
Lib10^4_#1 100_Jm^2 U2OS Sel PCR#1	TAG_BX_GCTCCACTCACT	70	C	C	T	58	49	9	C/T	0.8448	SNP
Lib10^4_#1 100_Jm^2 U2OS Sel PCR#1	TAG_BX_GCTCCACTCACT	85	G	G	A	58	49	9	G/A	0.8448	SNP
Lib10^4_#1 100_Jm^2 U2OS Sel PCR#1	TAG_BX_GCTCGCCGGTTC	85	G	GG	AA	43	34	7	GG/AA	0.7907	DNP
Lib10^4_#1 100_Jm^2 U2OS Sel PCR#1	TAG_BX_GCTCGCTGGGAG	121	G	G	A	36	24	12	G/A	0.6667	SNP
Lib10^4_#1 100_Jm^2 U2OS Sel PCR#1	TAG_BX_GCTGAAGCTTAC	82	A	A	G	15	12	2	A/G	0.8	SNP
Lib10^4_#1 100_Jm^2 U2OS Sel PCR#1	TAG_BX_GCTGAGATTCCT	118	G	G	A	50	38	12	G/A	0.76	SNP
Lib10^4_#1 100_Jm^2 U2OS Sel PCR#1	TAG_BX_GCTGAGATTCCT	157	A	AG	TT	53	35	15	AG/TT	0.6604	DNP
Lib10^4_#1 100_Jm^2 U2OS Sel PCR#1	TAG_BX_GCTGATTCTTCC	5	G	G	A	14	14	0	G/A	1	SNP
Lib10^4_#1 100_Jm^2 U2OS Sel PCR#1	TAG_BX_GCTGCCCACGTT	82	A	A	G	59	48	11	A/G	0.8136	SNP
Lib10^4_#1 100_Jm^2 U2OS Sel PCR#1	TAG_BX_GCTGCTGGATAT	124	T	TC	AT	113	82	23	TC/AT	0.7257	DNP
Lib10^4_#1 100_Jm^2 U2OS Sel PCR#1	TAG_BX_GCTTCCCTGCTG	-3	G	G	A	36	13	21	G/A	0.3611	SNP
Lib10^4_#1 100_Jm^2 U2OS Sel PCR#1	TAG_BX_GCTTCCCTGCTG	1	A	ATTTGATATGATGCGCCCCGCTTCCCGATAAGGGAGCAGGCCAGTAAAAGCATTACCTGTGGTGGGGTTCCCGAGCGGCCAAAGGGAGCAGACTCTAAATCTGCCGTCATCGACTTCGAAGGTTCGAATCCTTCCCCCACCACCATCACTTT		36	13	21	ATTTGATATGATGCGCCCCGCTTCCCGATAAGGGAGCAGGCCAGTAAAAGCATTACCTGTGGTGGGGTTCCCGAGCGGCCAAAGGGAGCAGACTCTAAATCTGCCGTCATCGACTTCGAAGGTTCGAATCCTTCCCCCACCACCATCACTTT/	0.3611	Del
Lib10^4_#1 100_Jm^2 U2OS Sel PCR#1	TAG_BX_GCTTCCCTGCTG	118	G	G	A	35	5	13	G/A	0.1429	SNP
Lib10^4_#1 100_Jm^2 U2OS Sel PCR#1	TAG_BX_GCTTGCCGTAGT	121	G	G	A	51	41	9	G/A	0.8039	SNP
Lib10^4_#1 100_Jm^2 U2OS Sel PCR#1	TAG_BX_GCTTGGGGCCAG	85	G	G	A	83	69	14	G/A	0.8313	SNP
Lib10^4_#1 100_Jm^2 U2OS Sel PCR#1	TAG_BX_GCTTGTCGACGG	-31	T	T	C	41	39	2	T/C	0.9512	SNP
Lib10^4_#1 100_Jm^2 U2OS Sel PCR#1	TAG_BX_GCTTGTCGACGG	118	G	G	A	41	32	8	G/A	0.7805	SNP
Lib10^4_#1 100_Jm^2 U2OS Sel PCR#1	TAG_BX_GCTTTTGTTTGG	69	T	T	C	14	3	11	T/C	0.2143	SNP
Lib10^4_#1 100_Jm^2 U2OS Sel PCR#1	TAG_BX_GCTTTTGTTTGG	118	G	G	A	14	11	3	G/A	0.7857	SNP
Lib10^4_#1 100_Jm^2 U2OS Sel PCR#1	TAG_BX_GGAAATACACCT	118	G	G	A	56	43	12	G/A	0.7679	SNP
Lib10^4_#1 100_Jm^2 U2OS Sel PCR#1	TAG_BX_GGAACTACCTCG	93	C	CTC	TTT	36	19	7	CTC/TTT	0.5278	Del-In
Lib10^4_#1 100_Jm^2 U2OS Sel PCR#1	TAG_BX_GGAACTACCTCG	93	C	C	T	36	9	7	C/T	0.25	SNP
Lib10^4_#1 100_Jm^2 U2OS Sel PCR#1	TAG_BX_GGAACTACCTCG	101	C	C	T	27	20	7	C/T	0.7407	SNP
Lib10^4_#1 100_Jm^2 U2OS Sel PCR#1	TAG_BX_GGACATTTCCGT	121	G	G	A	46	31	14	G/A	0.6739	SNP
Lib10^4_#1 100_Jm^2 U2OS Sel PCR#1	TAG_BX_GGACCATTCTGG	118	G	G	A	56	46	9	G/A	0.8214	SNP
Lib10^4_#1 100_Jm^2 U2OS Sel PCR#1	TAG_BX_GGAGCTTTACTC	130	C	C	A	65	47	17	C/A	0.7231	SNP
Lib10^4_#1 100_Jm^2 U2OS Sel PCR#1	TAG_BX_GGAGGACCAGCA	91	G	G	C	29	25	4	G/C	0.8621	SNP
Lib10^4_#1 100_Jm^2 U2OS Sel PCR#1	TAG_BX_GGAGGTTTGCGT	5	G	G	A	18	17	1	G/A	0.9444	SNP
Lib10^4_#1 100_Jm^2 U2OS Sel PCR#1	TAG_BX_GGAGGTTTGCGT	118	G	G	A	18	2	16	G/A	0.1111	SNP
Lib10^4_#1 100_Jm^2 U2OS Sel PCR#1	TAG_BX_GGAGTTTCCTCG	130	C	C	T	45	31	14	C/T	0.6889	SNP
Lib10^4_#1 100_Jm^2 U2OS Sel PCR#1	TAG_BX_GGATAGATAGCC	118	G	G	A	69	44	19	G/A	0.6377	SNP
Lib10^4_#1 100_Jm^2 U2OS Sel PCR#1	TAG_BX_GGATGCGTGGCA	118	G	G	A	33	25	8	G/A	0.7576	SNP
Lib10^4_#1 100_Jm^2 U2OS Sel PCR#1	TAG_BX_GGCATCAGAGGG	131	C	C	T	31	19	12	C/T	0.6129	SNP
Lib10^4_#1 100_Jm^2 U2OS Sel PCR#1	TAG_BX_GGCATGCTTGGT	98	A	A	T	19	16	3	A/T	0.8421	SNP
Lib10^4_#1 100_Jm^2 U2OS Sel PCR#1	TAG_BX_GGCCCGTACTTT	118	G	G	A	27	3	24	G/A	0.1111	SNP
Lib10^4_#1 100_Jm^2 U2OS Sel PCR#1	TAG_BX_GGCCCGTACTTT	130	C	C	T	27	22	4	C/T	0.8148	SNP
Lib10^4_#1 100_Jm^2 U2OS Sel PCR#1	TAG_BX_GGCCTGTCTACT	82	A	AAGGG	TAGAA	78	50	21	AAGGG/TAGAA	0.641	Del-In
Lib10^4_#1 100_Jm^2 U2OS Sel PCR#1	TAG_BX_GGCCTTGATTTT	118	G	G	A	18	17	0	G/A	0.9444	SNP
Lib10^4_#1 100_Jm^2 U2OS Sel PCR#1	TAG_BX_GGCCTTTGGGGT	124	T	TCGAAT	CCAAAC	401	224	77	TCGAAT/CCAAAC	0.5586	Del-In
Lib10^4_#1 100_Jm^2 U2OS Sel PCR#1	TAG_BX_GGCCTTTGGGGT	124	T	TCG	CCA	401	58	77	TCG/CCA	0.1446	Del-In
Lib10^4_#1 100_Jm^2 U2OS Sel PCR#1	TAG_BX_GGCCTTTGGGGT	134	C	C		305	218	81	C/	0.7148	1Del
Lib10^4_#1 100_Jm^2 U2OS Sel PCR#1	TAG_BX_GGCGACGCCTCT	118	G	G	A	54	47	7	G/A	0.8704	SNP
Lib10^4_#1 100_Jm^2 U2OS Sel PCR#1	TAG_BX_GGCGCGGATACG	134	C	C	A	38	30	8	C/A	0.7895	SNP
Lib10^4_#1 100_Jm^2 U2OS Sel PCR#1	TAG_BX_GGCTATTAAAGG	95	C	C	G	33	24	8	C/G	0.7273	SNP
Lib10^4_#1 100_Jm^2 U2OS Sel PCR#1	TAG_BX_GGCTATTAAAGG	117	C	C	A	33	24	9	C/A	0.7273	SNP
Lib10^4_#1 100_Jm^2 U2OS Sel PCR#1	TAG_BX_GGCTCGTATATT	118	G	G	A	27	23	4	G/A	0.8519	SNP
Lib10^4_#1 100_Jm^2 U2OS Sel PCR#1	TAG_BX_GGCTTAACGATT	95	C	C	G	104	83	21	C/G	0.7981	SNP
Lib10^4_#1 100_Jm^2 U2OS Sel PCR#1	TAG_BX_GGCTTAACGATT	105	C	C	T	104	81	21	C/T	0.7788	SNP
Lib10^4_#1 100_Jm^2 U2OS Sel PCR#1	TAG_BX_GGGCACCTTTAG	102	T	TG	AA	90	53	16	TG/AA	0.5889	DNP
Lib10^4_#1 100_Jm^2 U2OS Sel PCR#1	TAG_BX_GGGCACCTTTAG	102	T	T	A	90	20	16	T/A	0.2222	SNP
Lib10^4_#1 100_Jm^2 U2OS Sel PCR#1	TAG_BX_GGGCACCTTTAG	126	G	G	A	71	55	14	G/A	0.7746	SNP
Lib10^4_#1 100_Jm^2 U2OS Sel PCR#1	TAG_BX_GGGCGATTCCAG	118	G	G	A	277	203	70	G/A	0.7329	SNP
Lib10^4_#1 100_Jm^2 U2OS Sel PCR#1	TAG_BX_GGGCGATTGCCG	130	C	CC	TT	57	39	8	CC/TT	0.6842	DNP
Lib10^4_#1 100_Jm^2 U2OS Sel PCR#1	TAG_BX_GGGCGATTGCCG	130	C	C	T	57	9	8	C/T	0.1579	SNP
Lib10^4_#1 100_Jm^2 U2OS Sel PCR#1	TAG_BX_GGGGGCGTGATC	121	G	G	A	199	155	43	G/A	0.7789	SNP
Lib10^4_#1 100_Jm^2 U2OS Sel PCR#1	TAG_BX_GGGGGGCTAATG	131	C	C	T	50	33	16	C/T	0.66	SNP
Lib10^4_#1 100_Jm^2 U2OS Sel PCR#1	TAG_BX_GGGGGGCTAATG	162	G	G	A	49	30	19	G/A	0.6122	SNP
Lib10^4_#1 100_Jm^2 U2OS Sel PCR#1	TAG_BX_GGGGGTCATTTC	130	C	C	T	61	46	15	C/T	0.7541	SNP
Lib10^4_#1 100_Jm^2 U2OS Sel PCR#1	TAG_BX_GGGGGTCCGAGT	118	G	G	A	24	18	5	G/A	0.75	SNP
Lib10^4_#1 100_Jm^2 U2OS Sel PCR#1	TAG_BX_GGGGTTATTTGG	118	G	G	A	25	18	7	G/A	0.72	SNP
Lib10^4_#1 100_Jm^2 U2OS Sel PCR#1	TAG_BX_GGGTCCTAGGCG	126	G	G	T	38	30	8	G/T	0.7895	SNP
Lib10^4_#1 100_Jm^2 U2OS Sel PCR#1	TAG_BX_GGGTCCTGGGGT	7	T	T	A	35	30	5	T/A	0.8571	SNP
Lib10^4_#1 100_Jm^2 U2OS Sel PCR#1	TAG_BX_GGGTGTGAGGCA	-60	T	TC		76	75	1	TC/	0.9868	Del
Lib10^4_#1 100_Jm^2 U2OS Sel PCR#1	TAG_BX_GGGTGTGAGGCA	118	G	G	A	73	56	17	G/A	0.7671	SNP
Lib10^4_#1 100_Jm^2 U2OS Sel PCR#1	TAG_BX_GGGTGTTAAGGA	118	G	G	A	45	35	9	G/A	0.7778	SNP
Lib10^4_#1 100_Jm^2 U2OS Sel PCR#1	TAG_BX_GGGTTGATTGGT	131	C	C	T	111	73	38	C/T	0.6577	SNP
Lib10^4_#1 100_Jm^2 U2OS Sel PCR#1	TAG_BX_GGGTTTACTGTT	1	A	A		44	37	7	A/	0.8409	1Del
Lib10^4_#1 100_Jm^2 U2OS Sel PCR#1	TAG_BX_GGTACCTCCTAA	118	G	G	A	136	106	28	G/A	0.7794	SNP
Lib10^4_#1 100_Jm^2 U2OS Sel PCR#1	TAG_BX_GGTATCGTTTCT	118	G	G	A	52	38	14	G/A	0.7308	SNP
Lib10^4_#1 100_Jm^2 U2OS Sel PCR#1	TAG_BX_GGTCAGTTTGTG	130	C	CC	AA	55	36	11	CC/AA	0.6545	DNP
Lib10^4_#1 100_Jm^2 U2OS Sel PCR#1	TAG_BX_GGTCCCTTGTCT	130	C	C	T	40	30	10	C/T	0.75	SNP
Lib10^4_#1 100_Jm^2 U2OS Sel PCR#1	TAG_BX_GGTCCCTTTGCC	130	C	C	T	96	70	26	C/T	0.7292	SNP
Lib10^4_#1 100_Jm^2 U2OS Sel PCR#1	TAG_BX_GGTCCTAGATGG	118	G	G	A	88	72	16	G/A	0.8182	SNP
Lib10^4_#1 100_Jm^2 U2OS Sel PCR#1	TAG_BX_GGTCGCCGCTTT	97	A	A	G	45	31	14	A/G	0.6889	SNP
Lib10^4_#1 100_Jm^2 U2OS Sel PCR#1	TAG_BX_GGTCGGGCTAAA	130	C	C	G	121	92	28	C/G	0.7603	SNP
Lib10^4_#1 100_Jm^2 U2OS Sel PCR#1	TAG_BX_GGTCTACACGTG	131	C	C	T	21	13	8	C/T	0.619	SNP
Lib10^4_#1 100_Jm^2 U2OS Sel PCR#1	TAG_BX_GGTCTATCCCTG	5	G	G	A	12	12	0	G/A	1	SNP
Lib10^4_#1 100_Jm^2 U2OS Sel PCR#1	TAG_BX_GGTCTATCCCTG	91	G	G	A	12	12	0	G/A	1	SNP
Lib10^4_#1 100_Jm^2 U2OS Sel PCR#1	TAG_BX_GGTGGGTATTAA	118	G	G	A	30	22	7	G/A	0.7333	SNP
Lib10^4_#1 100_Jm^2 U2OS Sel PCR#1	TAG_BX_GGTGTGTGTGTC	118	G	G	A	74	60	10	G/A	0.8108	SNP
Lib10^4_#1 100_Jm^2 U2OS Sel PCR#1	TAG_BX_GGTTGGAGTTGG	118	G	G	T	17	8	9	G/T	0.4706	SNP
Lib10^4_#1 100_Jm^2 U2OS Sel PCR#1	TAG_BX_GGTTTAGAGGGG	121	G	G	A	38	31	7	G/A	0.8158	SNP
Lib10^4_#1 100_Jm^2 U2OS Sel PCR#1	TAG_BX_GGTTTATGAAGT	34	G	G	T	78	64	14	G/T	0.8205	SNP
Lib10^4_#1 100_Jm^2 U2OS Sel PCR#1	TAG_BX_GGTTTATGAAGT	89	C	C	A	78	59	18	C/A	0.7564	SNP
Lib10^4_#1 100_Jm^2 U2OS Sel PCR#1	TAG_BX_GGTTTCTTTTGC	74	A	A	G	44	38	5	A/G	0.8636	SNP
Lib10^4_#1 100_Jm^2 U2OS Sel PCR#1	TAG_BX_GTAAGAGTTGTA	118	G	G	A	50	41	9	G/A	0.82	SNP
Lib10^4_#1 100_Jm^2 U2OS Sel PCR#1	TAG_BX_GTACACATGATT	111	C	C	A	46	36	10	C/A	0.7826	SNP
Lib10^4_#1 100_Jm^2 U2OS Sel PCR#1	TAG_BX_GTACACATGATT	117	C	C	T	46	36	10	C/T	0.7826	SNP
Lib10^4_#1 100_Jm^2 U2OS Sel PCR#1	TAG_BX_GTACACATGATT	134	C	C	T	46	34	11	C/T	0.7391	SNP
Lib10^4_#1 100_Jm^2 U2OS Sel PCR#1	TAG_BX_GTACGCCGGGTT	118	G	G	A	43	36	7	G/A	0.8372	SNP
Lib10^4_#1 100_Jm^2 U2OS Sel PCR#1	TAG_BX_GTACGGTACTCC	82	A	AA	TT	13	8	5	AA/TT	0.6154	DNP
Lib10^4_#1 100_Jm^2 U2OS Sel PCR#1	TAG_BX_GTAGACGGAGTC	99	A	A	G	97	78	18	A/G	0.8041	SNP
Lib10^4_#1 100_Jm^2 U2OS Sel PCR#1	TAG_BX_GTAGTCGCCTAA	130	C	C	T	123	88	31	C/T	0.7154	SNP
Lib10^4_#1 100_Jm^2 U2OS Sel PCR#1	TAG_BX_GTATGTATTGCA	112	G	GAC	TAA	23	13	4	GAC/TAA	0.5652	Del-In
Lib10^4_#1 100_Jm^2 U2OS Sel PCR#1	TAG_BX_GTATGTATTGCA	112	G	G	T	23	6	4	G/T	0.2609	SNP
Lib10^4_#1 100_Jm^2 U2OS Sel PCR#1	TAG_BX_GTATGTGTCGGT	5	G	G	C	29	28	1	G/C	0.9655	SNP
Lib10^4_#1 100_Jm^2 U2OS Sel PCR#1	TAG_BX_GTATGTGTCGGT	118	G	G	A	29	3	26	G/A	0.1034	SNP
Lib10^4_#1 100_Jm^2 U2OS Sel PCR#1	TAG_BX_GTATTGTTACTG	121	G	G	A	44	32	12	G/A	0.7273	SNP
Lib10^4_#1 100_Jm^2 U2OS Sel PCR#1	TAG_BX_GTCAGAAACCGG	130	C	CC	AA	47	28	9	CC/AA	0.5957	DNP
Lib10^4_#1 100_Jm^2 U2OS Sel PCR#1	TAG_BX_GTCAGAAACCGG	130	C	C	A	47	9	9	C/A	0.1915	SNP
Lib10^4_#1 100_Jm^2 U2OS Sel PCR#1	TAG_BX_GTCCAGCCCCGT	118	G	G	A	95	21	74	G/A	0.2211	SNP
Lib10^4_#1 100_Jm^2 U2OS Sel PCR#1	TAG_BX_GTCCAGCCCCGT	130	C	C	T	95	58	35	C/T	0.6105	SNP
Lib10^4_#1 100_Jm^2 U2OS Sel PCR#1	TAG_BX_GTCGATATCTTC	101	C	C	G	192	150	36	C/G	0.7812	SNP
Lib10^4_#1 100_Jm^2 U2OS Sel PCR#1	TAG_BX_GTCGCCGCTCTT	5	G	G	A	15	10	4	G/A	0.6667	SNP
Lib10^4_#1 100_Jm^2 U2OS Sel PCR#1	TAG_BX_GTCGCGTAACCT	131	C	C	A	56	42	13	C/A	0.75	SNP
Lib10^4_#1 100_Jm^2 U2OS Sel PCR#1	TAG_BX_GTCGCGTTCCCT	24	C	C	T	145	131	14	C/T	0.9034	SNP
Lib10^4_#1 100_Jm^2 U2OS Sel PCR#1	TAG_BX_GTCGCGTTCCCT	131	C	C	T	145	113	29	C/T	0.7793	SNP
Lib10^4_#1 100_Jm^2 U2OS Sel PCR#1	TAG_BX_GTCGCGTTCCCT	137	C	C	T	144	108	33	C/T	0.75	SNP
Lib10^4_#1 100_Jm^2 U2OS Sel PCR#1	TAG_BX_GTCGTCTGTTTA	73	G	GAG	AAA	26	16	5	GAG/AAA	0.6154	Del-In
Lib10^4_#1 100_Jm^2 U2OS Sel PCR#1	TAG_BX_GTCGTCTGTTTA	73	G	G	A	26	4	5	G/A	0.1538	SNP
Lib10^4_#1 100_Jm^2 U2OS Sel PCR#1	TAG_BX_GTCTGCTGTGGC	95	C	C	G	122	91	29	C/G	0.7459	SNP
Lib10^4_#1 100_Jm^2 U2OS Sel PCR#1	TAG_BX_GTCTGCTGTGGC	111	C	C	T	122	89	32	C/T	0.7295	SNP
Lib10^4_#1 100_Jm^2 U2OS Sel PCR#1	TAG_BX_GTCTGGTAGAAG	118	G	G	A	52	42	9	G/A	0.8077	SNP
Lib10^4_#1 100_Jm^2 U2OS Sel PCR#1	TAG_BX_GTCTTTACACTA	96	T	T	G	94	34	59	T/G	0.3617	SNP
Lib10^4_#1 100_Jm^2 U2OS Sel PCR#1	TAG_BX_GTCTTTACACTA	118	G	G	A	94	42	51	G/A	0.4468	SNP
Lib10^4_#1 100_Jm^2 U2OS Sel PCR#1	TAG_BX_GTCTTTTTTATT	117	C	C	T	104	71	32	C/T	0.6827	SNP
Lib10^4_#1 100_Jm^2 U2OS Sel PCR#1	TAG_BX_GTCTTTTTTATT	125	C	C	G	104	72	31	C/G	0.6923	SNP
Lib10^4_#1 100_Jm^2 U2OS Sel PCR#1	TAG_BX_GTCTTTTTTATT	153	C	C	T	104	69	35	C/T	0.6635	SNP
Lib10^4_#1 100_Jm^2 U2OS Sel PCR#1	TAG_BX_GTCTTTTTTATT	187	C	CATC	AATT	114	61	42	CATC/AATT	0.5351	Del-In
Lib10^4_#1 100_Jm^2 U2OS Sel PCR#1	TAG_BX_GTGAAATCATAG	118	G	G	T	36	27	7	G/T	0.75	SNP
Lib10^4_#1 100_Jm^2 U2OS Sel PCR#1	TAG_BX_GTGCGCTTGTCC	-34	C	CC	TT	138	86	50	CC/TT	0.6232	DNP
Lib10^4_#1 100_Jm^2 U2OS Sel PCR#1	TAG_BX_GTGCGCTTGTCC	24	C	C	A	135	70	21	C/A	0.5185	SNP
Lib10^4_#1 100_Jm^2 U2OS Sel PCR#1	TAG_BX_GTGCGCTTGTCC	24	C	C	T	135	44	21	C/T	0.3259	SNP
Lib10^4_#1 100_Jm^2 U2OS Sel PCR#1	TAG_BX_GTGCGCTTGTCC	95	C	C	G	135	68	67	C/G	0.5037	SNP
Lib10^4_#1 100_Jm^2 U2OS Sel PCR#1	TAG_BX_GTGCGCTTGTCC	96	T	T	C	135	37	98	T/C	0.2741	SNP
Lib10^4_#1 100_Jm^2 U2OS Sel PCR#1	TAG_BX_GTGCGCTTTTGC	85	G	G	A	77	59	18	G/A	0.7662	SNP
Lib10^4_#1 100_Jm^2 U2OS Sel PCR#1	TAG_BX_GTGCGCTTTTGC	118	G	G	A	77	9	68	G/A	0.1169	SNP
Lib10^4_#1 100_Jm^2 U2OS Sel PCR#1	TAG_BX_GTGCGGCTTGCG	11	A	A	T	14	14	0	A/T	1	SNP
Lib10^4_#1 100_Jm^2 U2OS Sel PCR#1	TAG_BX_GTGCTAATCCCG	1	A	A		64	54	5	A/	0.8438	1Del
Lib10^4_#1 100_Jm^2 U2OS Sel PCR#1	TAG_BX_GTGCTCATAGGT	85	G	G	A	191	146	43	G/A	0.7644	SNP
Lib10^4_#1 100_Jm^2 U2OS Sel PCR#1	TAG_BX_GTGCTTTGATCT	118	G	G	A	61	42	17	G/A	0.6885	SNP
Lib10^4_#1 100_Jm^2 U2OS Sel PCR#1	TAG_BX_GTGGCACCGTTG	-21	A	A	T	101	96	3	A/T	0.9505	SNP
Lib10^4_#1 100_Jm^2 U2OS Sel PCR#1	TAG_BX_GTGGCACCGTTG	9	T	T		101	94	7	T/	0.9307	1Del
Lib10^4_#1 100_Jm^2 U2OS Sel PCR#1	TAG_BX_GTGGGAAATTTG	118	G	G	A	33	26	6	G/A	0.7879	SNP
Lib10^4_#1 100_Jm^2 U2OS Sel PCR#1	TAG_BX_GTGGGTTTTCAT	112	G	GAC	AAA	55	36	9	GAC/AAA	0.6545	Del-In
Lib10^4_#1 100_Jm^2 U2OS Sel PCR#1	TAG_BX_GTGGGTTTTCAT	112	G	G	A	55	10	9	G/A	0.1818	SNP
Lib10^4_#1 100_Jm^2 U2OS Sel PCR#1	TAG_BX_GTGTATTGTAGT	63	T	T		26	17	7	T/	0.6538	1Del
Lib10^4_#1 100_Jm^2 U2OS Sel PCR#1	TAG_BX_GTGTATTTCATA	118	G	G	A	40	32	7	G/A	0.8	SNP
Lib10^4_#1 100_Jm^2 U2OS Sel PCR#1	TAG_BX_GTGTCTAGTAGC	118	G	G	A	49	35	13	G/A	0.7143	SNP
Lib10^4_#1 100_Jm^2 U2OS Sel PCR#1	TAG_BX_GTGTGAGATGCT	71	C	CC	AT	125	63	56	CC/AT	0.504	DNP
Lib10^4_#1 100_Jm^2 U2OS Sel PCR#1	TAG_BX_GTGTGAGATGCT	117	C	C	T	121	58	62	C/T	0.4793	SNP
Lib10^4_#1 100_Jm^2 U2OS Sel PCR#1	TAG_BX_GTGTGAGATGCT	131	C	C	T	120	37	81	C/T	0.3083	SNP
Lib10^4_#1 100_Jm^2 U2OS Sel PCR#1	TAG_BX_GTGTTATAACCA	82	A	AAG	GAA	219	158	46	AAG/GAA	0.7215	Del-In
Lib10^4_#1 100_Jm^2 U2OS Sel PCR#1	TAG_BX_GTGTTTGGCGTT	5	G	G	A	20	19	1	G/A	0.95	SNP
Lib10^4_#1 100_Jm^2 U2OS Sel PCR#1	TAG_BX_GTTAATTCTATC	118	G	G	A	66	48	18	G/A	0.7273	SNP
Lib10^4_#1 100_Jm^2 U2OS Sel PCR#1	TAG_BX_GTTATTGTCCGG	95	C	C	G	33	29	4	C/G	0.8788	SNP
Lib10^4_#1 100_Jm^2 U2OS Sel PCR#1	TAG_BX_GTTATTGTCCGG	111	C	C	T	33	29	4	C/T	0.8788	SNP
Lib10^4_#1 100_Jm^2 U2OS Sel PCR#1	TAG_BX_GTTCGATGTGTA	-63	G	G	A	62	59	3	G/A	0.9516	SNP
Lib10^4_#1 100_Jm^2 U2OS Sel PCR#1	TAG_BX_GTTCGATGTGTA	85	G	GGA	AGG	64	47	13	GGA/AGG	0.7344	Del-In
Lib10^4_#1 100_Jm^2 U2OS Sel PCR#1	TAG_BX_GTTCGATGTGTA	158	G	G	A	62	46	15	G/A	0.7419	SNP
Lib10^4_#1 100_Jm^2 U2OS Sel PCR#1	TAG_BX_GTTCGCTACGAG	136	C	CC	AT	465	293	72	CC/AT	0.6301	DNP
Lib10^4_#1 100_Jm^2 U2OS Sel PCR#1	TAG_BX_GTTCGCTACGAG	136	C	C	A	465	99	72	C/A	0.2129	SNP
Lib10^4_#1 100_Jm^2 U2OS Sel PCR#1	TAG_BX_GTTGCTCACATA	-56	G	G	A	104	103	1	G/A	0.9904	SNP
Lib10^4_#1 100_Jm^2 U2OS Sel PCR#1	TAG_BX_GTTGCTCACATA	84	G	GG	AA	106	76	27	GG/AA	0.717	DNP
Lib10^4_#1 100_Jm^2 U2OS Sel PCR#1	TAG_BX_GTTGGGGCTATG	130	C	C	T	38	29	9	C/T	0.7632	SNP
Lib10^4_#1 100_Jm^2 U2OS Sel PCR#1	TAG_BX_GTTGTTCCTTGT	118	G	G	A	26	20	6	G/A	0.7692	SNP
Lib10^4_#1 100_Jm^2 U2OS Sel PCR#1	TAG_BX_GTTTGCATTGGA	118	G	G	A	127	90	35	G/A	0.7087	SNP
Lib10^4_#1 100_Jm^2 U2OS Sel PCR#1	TAG_BX_GTTTTAGATTTG	117	C	C	T	32	25	7	C/T	0.7812	SNP
Lib10^4_#1 100_Jm^2 U2OS Sel PCR#1	TAG_BX_GTTTTAGATTTG	131	C	CTTC	TT	32	24	6	CTTC/TT	0.75	Del-In
Lib10^4_#1 100_Jm^2 U2OS Sel PCR#1	TAG_BX_GTTTTCCGTCTC	130	C	C	A	59	48	10	C/A	0.8136	SNP
Lib10^4_#1 100_Jm^2 U2OS Sel PCR#1	TAG_BX_GTTTTCTTGTTG	76	C	CGGCCAAAGGGAGCAGACTCTAA		23	12	10	CGGCCAAAGGGAGCAGACTCTAA/	0.5217	Del
Lib10^4_#1 100_Jm^2 U2OS Sel PCR#1	TAG_BX_GTTTTCTTGTTG	117	C	C	T	23	5	17	C/T	0.2174	SNP
Lib10^4_#1 100_Jm^2 U2OS Sel PCR#1	TAG_BX_GTTTTGCCGGAT	121	G	G	A	102	84	17	G/A	0.8235	SNP
Lib10^4_#1 100_Jm^2 U2OS Sel PCR#1	TAG_BX_TAACGCCAGAGA	118	G	G	A	241	200	38	G/A	0.8299	SNP
Lib10^4_#1 100_Jm^2 U2OS Sel PCR#1	TAG_BX_TAAGATGTACGA	118	G	G	A	79	63	16	G/A	0.7975	SNP
Lib10^4_#1 100_Jm^2 U2OS Sel PCR#1	TAG_BX_TAAGGGTTGTGG	73	G	GAG	AAA	28	21	6	GAG/AAA	0.75	Del-In
Lib10^4_#1 100_Jm^2 U2OS Sel PCR#1	TAG_BX_TAAGTGTTGGTT	70	C	CCC	TT	141	111	26	CCC/TT	0.7872	Del-In
Lib10^4_#1 100_Jm^2 U2OS Sel PCR#1	TAG_BX_TAATTAGGTTAC	11	A	A	T	21	20	1	A/T	0.9524	SNP
Lib10^4_#1 100_Jm^2 U2OS Sel PCR#1	TAG_BX_TAATTAGGTTAC	69	T	T	C	21	3	18	T/C	0.1429	SNP
Lib10^4_#1 100_Jm^2 U2OS Sel PCR#1	TAG_BX_TAATTTTCATTG	118	G	G	A	56	40	15	G/A	0.7143	SNP
Lib10^4_#1 100_Jm^2 U2OS Sel PCR#1	TAG_BX_TACCAATCATCT	118	G	G	A	65	50	15	G/A	0.7692	SNP
Lib10^4_#1 100_Jm^2 U2OS Sel PCR#1	TAG_BX_TACTACTTGACG	23	T	T	C	40	29	11	T/C	0.725	SNP
Lib10^4_#1 100_Jm^2 U2OS Sel PCR#1	TAG_BX_TACTACTTGACG	118	G	G	A	40	26	14	G/A	0.65	SNP
Lib10^4_#1 100_Jm^2 U2OS Sel PCR#1	TAG_BX_TACTCGCTCACG	117	C	C	T	20	16	4	C/T	0.8	SNP
Lib10^4_#1 100_Jm^2 U2OS Sel PCR#1	TAG_BX_TACTGATCCCGT	118	G	G	A	40	33	7	G/A	0.825	SNP
Lib10^4_#1 100_Jm^2 U2OS Sel PCR#1	TAG_BX_TACTTCTGATGT	-41	T	T	C	484	478	0	T/C	0.9876	SNP
Lib10^4_#1 100_Jm^2 U2OS Sel PCR#1	TAG_BX_TACTTCTGATGT	-34	C	CCTTTCTCAACGTAACACTTTACAGCGGCGCGTCATTTGATATGATGCGCCCCGCTTCCCGATAAGGGAGCAGGCCAGTAAAAGCATTACCTGTGGTGGGGTTC		484	467	3	CCTTTCTCAACGTAACACTTTACAGCGGCGCGTCATTTGATATGATGCGCCCCGCTTCCCGATAAGGGAGCAGGCCAGTAAAAGCATTACCTGTGGTGGGGTTC/	0.9649	Del
Lib10^4_#1 100_Jm^2 U2OS Sel PCR#1	TAG_BX_TAGACACACTTA	121	G	G	A	67	51	15	G/A	0.7612	SNP
Lib10^4_#1 100_Jm^2 U2OS Sel PCR#1	TAG_BX_TAGATCGCTGAT	96	T	T	A	148	112	35	T/A	0.7568	SNP
Lib10^4_#1 100_Jm^2 U2OS Sel PCR#1	TAG_BX_TAGCAGGAACCA	120	A	AG	TA	157	106	40	AG/TA	0.6752	DNP
Lib10^4_#1 100_Jm^2 U2OS Sel PCR#1	TAG_BX_TAGCTGTGGGCA	71	C	CC		38	34	3	CC/	0.8947	Del
Lib10^4_#1 100_Jm^2 U2OS Sel PCR#1	TAG_BX_TAGGGTCCTTCT	-63	G	G	C	78	77	1	G/C	0.9872	SNP
Lib10^4_#1 100_Jm^2 U2OS Sel PCR#1	TAG_BX_TAGGGTCCTTCT	-59	C	C		78	77	1	C/	0.9872	1Del
Lib10^4_#1 100_Jm^2 U2OS Sel PCR#1	TAG_BX_TAGGGTCCTTCT	95	C	C	G	77	58	19	C/G	0.7532	SNP
Lib10^4_#1 100_Jm^2 U2OS Sel PCR#1	TAG_BX_TAGGGTCCTTCT	111	C	C	T	77	55	22	C/T	0.7143	SNP
Lib10^4_#1 100_Jm^2 U2OS Sel PCR#1	TAG_BX_TATAGTGGTCCG	17	C	CC	TT	56	45	8	CC/TT	0.8036	DNP
Lib10^4_#1 100_Jm^2 U2OS Sel PCR#1	TAG_BX_TATAGTGGTCCG	118	G	G	A	53	41	11	G/A	0.7736	SNP
Lib10^4_#1 100_Jm^2 U2OS Sel PCR#1	TAG_BX_TATATTGACGTT	61	G	GG	AA	364	253	87	GG/AA	0.6951	DNP
Lib10^4_#1 100_Jm^2 U2OS Sel PCR#1	TAG_BX_TATATTGACGTT	126	G	G	C	348	36	309	G/C	0.1034	SNP
Lib10^4_#1 100_Jm^2 U2OS Sel PCR#1	TAG_BX_TATCCATTCATA	64	G	GG	AT	132	106	17	GG/AT	0.803	DNP
Lib10^4_#1 100_Jm^2 U2OS Sel PCR#1	TAG_BX_TATCCATTCATA	71	C	C	A	127	104	18	C/A	0.8189	SNP
Lib10^4_#1 100_Jm^2 U2OS Sel PCR#1	TAG_BX_TATCTGGAGCAC	130	C	C	T	90	72	17	C/T	0.8	SNP
Lib10^4_#1 100_Jm^2 U2OS Sel PCR#1	TAG_BX_TATCTTAATATC	131	C	C	T	265	203	61	C/T	0.766	SNP
Lib10^4_#1 100_Jm^2 U2OS Sel PCR#1	TAG_BX_TATCTTCTATTG	134	C	CC		54	39	15	CC/	0.7222	Del
Lib10^4_#1 100_Jm^2 U2OS Sel PCR#1	TAG_BX_TATGAAGGTGTT	34	G	G	A	241	167	70	G/A	0.6929	SNP
Lib10^4_#1 100_Jm^2 U2OS Sel PCR#1	TAG_BX_TATGAAGGTGTT	85	G	GG	AT	265	163	72	GG/AT	0.6151	DNP
Lib10^4_#1 100_Jm^2 U2OS Sel PCR#1	TAG_BX_TATGAAGGTGTT	197	G	G	T	240	137	103	G/T	0.5708	SNP
Lib10^4_#1 100_Jm^2 U2OS Sel PCR#1	TAG_BX_TATGGATGTTAG	118	G	G	A	30	18	10	G/A	0.6	SNP
Lib10^4_#1 100_Jm^2 U2OS Sel PCR#1	TAG_BX_TATGGCTTGGGT	81	A	A	T	23	14	9	A/T	0.6087	SNP
Lib10^4_#1 100_Jm^2 U2OS Sel PCR#1	TAG_BX_TATGGCTTGGGT	85	G	G	A	23	14	8	G/A	0.6087	SNP
Lib10^4_#1 100_Jm^2 U2OS Sel PCR#1	TAG_BX_TATGTGCGCCGT	5	G	G	A	47	46	1	G/A	0.9787	SNP
Lib10^4_#1 100_Jm^2 U2OS Sel PCR#1	TAG_BX_TATGTGCGCCGT	33	G	G	A	46	40	6	G/A	0.8696	SNP
Lib10^4_#1 100_Jm^2 U2OS Sel PCR#1	TAG_BX_TATGTTGAAAGA	112	G	GAC	AAA	39	29	4	GAC/AAA	0.7436	Del-In
Lib10^4_#1 100_Jm^2 U2OS Sel PCR#1	TAG_BX_TATGTTGAAAGA	112	G	G	A	39	6	4	G/A	0.1538	SNP
Lib10^4_#1 100_Jm^2 U2OS Sel PCR#1	TAG_BX_TATTCCATTTAT	97	A	A	G	24	18	6	A/G	0.75	SNP
Lib10^4_#1 100_Jm^2 U2OS Sel PCR#1	TAG_BX_TATTCGTTCGTT	118	G	G	A	26	23	2	G/A	0.8846	SNP
Lib10^4_#1 100_Jm^2 U2OS Sel PCR#1	TAG_BX_TATTGAGGGGGC	12	T	T	A	74	66	6	T/A	0.8919	SNP
Lib10^4_#1 100_Jm^2 U2OS Sel PCR#1	TAG_BX_TATTGAGGGGGC	138	C	C	A	73	54	19	C/A	0.7397	SNP
Lib10^4_#1 100_Jm^2 U2OS Sel PCR#1	TAG_BX_TATTTGTTTCTG	20	G	GCTTCCCGATAAGGGAGCAGGCCAGTAAAAGCATTACCTGTGGTGGGGTTCCCGAGCGGCCAAAGGGAGCAGACTCTAAATCTGCCGTCATCGACTTCG		418	384	30	GCTTCCCGATAAGGGAGCAGGCCAGTAAAAGCATTACCTGTGGTGGGGTTCCCGAGCGGCCAAAGGGAGCAGACTCTAAATCTGCCGTCATCGACTTCG/	0.9187	Del
Lib10^4_#1 100_Jm^2 U2OS Sel PCR#1	TAG_BX_TCAGACGCTTTA	118	G	G	A	23	17	6	G/A	0.7391	SNP
Lib10^4_#1 100_Jm^2 U2OS Sel PCR#1	TAG_BX_TCAGATCTGCCT	-65	A	A		134	130	4	A/	0.9701	1Del
Lib10^4_#1 100_Jm^2 U2OS Sel PCR#1	TAG_BX_TCAGATCTGCCT	101	C	C	T	131	102	28	C/T	0.7786	SNP
Lib10^4_#1 100_Jm^2 U2OS Sel PCR#1	TAG_BX_TCAGATCTGCCT	108	C	CATC	TATT	157	104	29	CATC/TATT	0.6624	Del-In
Lib10^4_#1 100_Jm^2 U2OS Sel PCR#1	TAG_BX_TCAGATCTGCCT	108	C	C	T	157	22	29	C/T	0.1401	SNP
Lib10^4_#1 100_Jm^2 U2OS Sel PCR#1	TAG_BX_TCAGATCTGCCT	117	C	C	T	129	102	27	C/T	0.7907	SNP
Lib10^4_#1 100_Jm^2 U2OS Sel PCR#1	TAG_BX_TCAGATCTGCCT	125	C	C	A	129	103	26	C/A	0.7984	SNP
Lib10^4_#1 100_Jm^2 U2OS Sel PCR#1	TAG_BX_TCAGATCTGCCT	137	C	C	A	129	96	31	C/A	0.7442	SNP
Lib10^4_#1 100_Jm^2 U2OS Sel PCR#1	TAG_BX_TCAGGTTGGAAC	24	C	C	T	57	51	6	C/T	0.8947	SNP
Lib10^4_#1 100_Jm^2 U2OS Sel PCR#1	TAG_BX_TCAGGTTGGAAC	73	G	GAG	AAA	66	46	8	GAG/AAA	0.697	Del-In
Lib10^4_#1 100_Jm^2 U2OS Sel PCR#1	TAG_BX_TCAGGTTGGAAC	73	G	G	A	66	11	8	G/A	0.1667	SNP
Lib10^4_#1 100_Jm^2 U2OS Sel PCR#1	TAG_BX_TCAGGTTGGAAC	126	G	G	A	56	45	11	G/A	0.8036	SNP
Lib10^4_#1 100_Jm^2 U2OS Sel PCR#1	TAG_BX_TCCACTCCAACG	117	C	C	T	75	57	18	C/T	0.76	SNP
Lib10^4_#1 100_Jm^2 U2OS Sel PCR#1	TAG_BX_TCCACTCCAACG	133	T	T	C	75	53	21	T/C	0.7067	SNP
Lib10^4_#1 100_Jm^2 U2OS Sel PCR#1	TAG_BX_TCCGATATTGTC	118	G	G	A	102	80	19	G/A	0.7843	SNP
Lib10^4_#1 100_Jm^2 U2OS Sel PCR#1	TAG_BX_TCCGCGAGGGGA	5	G	GAT	AAA	49	41	0	GAT/AAA	0.8367	Del-In
Lib10^4_#1 100_Jm^2 U2OS Sel PCR#1	TAG_BX_TCCGCGAGGGGA	5	G	G	A	49	8	0	G/A	0.1633	SNP
Lib10^4_#1 100_Jm^2 U2OS Sel PCR#1	TAG_BX_TCCGCTGATCAT	126	G	G	C	77	55	22	G/C	0.7143	SNP
Lib10^4_#1 100_Jm^2 U2OS Sel PCR#1	TAG_BX_TCCGGTGTTGTC	121	G	G	A	208	162	44	G/A	0.7788	SNP
Lib10^4_#1 100_Jm^2 U2OS Sel PCR#1	TAG_BX_TCCGTCACCTAT	118	G	G	A	54	43	10	G/A	0.7963	SNP
Lib10^4_#1 100_Jm^2 U2OS Sel PCR#1	TAG_BX_TCCTCCGTCCTT	118	G	G	A	205	151	50	G/A	0.7366	SNP
Lib10^4_#1 100_Jm^2 U2OS Sel PCR#1	TAG_BX_TCCTCTATGAGT	130	C	C	T	23	15	8	C/T	0.6522	SNP
Lib10^4_#1 100_Jm^2 U2OS Sel PCR#1	TAG_BX_TCCTTGTTAGTG	118	G	G	A	101	78	22	G/A	0.7723	SNP
Lib10^4_#1 100_Jm^2 U2OS Sel PCR#1	TAG_BX_TCGAACTAGGAG	118	G	G	A	78	59	17	G/A	0.7564	SNP
Lib10^4_#1 100_Jm^2 U2OS Sel PCR#1	TAG_BX_TCGACCAGTTTA	118	G	G	A	54	40	14	G/A	0.7407	SNP
Lib10^4_#1 100_Jm^2 U2OS Sel PCR#1	TAG_BX_TCGATTTTAAAT	117	C	C	T	12	10	2	C/T	0.8333	SNP
Lib10^4_#1 100_Jm^2 U2OS Sel PCR#1	TAG_BX_TCGATTTTAAAT	134	C	C	T	12	10	2	C/T	0.8333	SNP
Lib10^4_#1 100_Jm^2 U2OS Sel PCR#1	TAG_BX_TCGCACGCCGTA	118	G	G	A	46	38	7	G/A	0.8261	SNP
Lib10^4_#1 100_Jm^2 U2OS Sel PCR#1	TAG_BX_TCGCACGTTCGG	114	C	CT	TA	15	12	2	CT/TA	0.8	DNP
Lib10^4_#1 100_Jm^2 U2OS Sel PCR#1	TAG_BX_TCGCCTCCTTAA	131	C	C	T	90	68	22	C/T	0.7556	SNP
Lib10^4_#1 100_Jm^2 U2OS Sel PCR#1	TAG_BX_TCGCGATTCTTT	27	G	G	T	19	18	1	G/T	0.9474	SNP
Lib10^4_#1 100_Jm^2 U2OS Sel PCR#1	TAG_BX_TCGCGATTCTTT	85	G	G	A	19	16	3	G/A	0.8421	SNP
Lib10^4_#1 100_Jm^2 U2OS Sel PCR#1	TAG_BX_TCGCTGTGGAGT	118	G	G	A	30	20	7	G/A	0.6667	SNP
Lib10^4_#1 100_Jm^2 U2OS Sel PCR#1	TAG_BX_TCGCTGTTAGTG	101	C	C	A	53	38	14	C/A	0.717	SNP
Lib10^4_#1 100_Jm^2 U2OS Sel PCR#1	TAG_BX_TCGGGCATCGTT	118	G	G	A	34	24	9	G/A	0.7059	SNP
Lib10^4_#1 100_Jm^2 U2OS Sel PCR#1	TAG_BX_TCGTAAGTAGTT	5	G	G	A	18	17	1	G/A	0.9444	SNP
Lib10^4_#1 100_Jm^2 U2OS Sel PCR#1	TAG_BX_TCGTCCCCACTA	97	A	A	T	37	29	8	A/T	0.7838	SNP
Lib10^4_#1 100_Jm^2 U2OS Sel PCR#1	TAG_BX_TCGTGGGGGGCT	125	C	C	T	67	42	24	C/T	0.6269	SNP
Lib10^4_#1 100_Jm^2 U2OS Sel PCR#1	TAG_BX_TCGTGGGGGGCT	134	C	C	T	67	40	27	C/T	0.597	SNP
Lib10^4_#1 100_Jm^2 U2OS Sel PCR#1	TAG_BX_TCGTGTTCTAGG	5	G	G	A	98	30	68	G/A	0.3061	SNP
Lib10^4_#1 100_Jm^2 U2OS Sel PCR#1	TAG_BX_TCGTGTTCTAGG	126	G	G	C	98	26	71	G/C	0.2653	SNP
Lib10^4_#1 100_Jm^2 U2OS Sel PCR#1	TAG_BX_TCGTGTTCTAGG	130	C	C	T	98	47	50	C/T	0.4796	SNP
Lib10^4_#1 100_Jm^2 U2OS Sel PCR#1	TAG_BX_TCGTTAGTCCAT	118	G	G	A	62	47	14	G/A	0.7581	SNP
Lib10^4_#1 100_Jm^2 U2OS Sel PCR#1	TAG_BX_TCGTTGTCATTA	126	G	G	T	41	26	15	G/T	0.6341	SNP
Lib10^4_#1 100_Jm^2 U2OS Sel PCR#1	TAG_BX_TCTACTTCGCAG	125	C	C	T	84	66	15	C/T	0.7857	SNP
Lib10^4_#1 100_Jm^2 U2OS Sel PCR#1	TAG_BX_TCTACTTCGCAG	135	C	C	A	84	66	18	C/A	0.7857	SNP
Lib10^4_#1 100_Jm^2 U2OS Sel PCR#1	TAG_BX_TCTAGCTGACCA	85	G	G	A	94	78	16	G/A	0.8298	SNP
Lib10^4_#1 100_Jm^2 U2OS Sel PCR#1	TAG_BX_TCTCTATACGAG	5	G	G	A	37	34	3	G/A	0.9189	SNP
Lib10^4_#1 100_Jm^2 U2OS Sel PCR#1	TAG_BX_TCTCTGGGTTGT	118	G	G	A	234	178	52	G/A	0.7607	SNP
Lib10^4_#1 100_Jm^2 U2OS Sel PCR#1	TAG_BX_TCTCTGTTGGGT	21	C	CTTCCCGATAAGGGAGCAGGCCAGTAAAAGCATTACCTGTGGTGGGGTTCC		41	32	9	CTTCCCGATAAGGGAGCAGGCCAGTAAAAGCATTACCTGTGGTGGGGTTCC/	0.7805	Del
Lib10^4_#1 100_Jm^2 U2OS Sel PCR#1	TAG_BX_TCTGAGATGTTT	118	G	G	A	61	46	14	G/A	0.7541	SNP
Lib10^4_#1 100_Jm^2 U2OS Sel PCR#1	TAG_BX_TCTGGAGAGGTT	118	G	G	A	95	68	24	G/A	0.7158	SNP
Lib10^4_#1 100_Jm^2 U2OS Sel PCR#1	TAG_BX_TCTTACGTGGTC	118	G	G	A	66	7	58	G/A	0.1061	SNP
Lib10^4_#1 100_Jm^2 U2OS Sel PCR#1	TAG_BX_TCTTACGTGGTC	130	C	C	T	66	8	56	C/T	0.1212	SNP
Lib10^4_#1 100_Jm^2 U2OS Sel PCR#1	TAG_BX_TCTTACGTGGTC	131	C	C	T	66	39	25	C/T	0.5909	SNP
Lib10^4_#1 100_Jm^2 U2OS Sel PCR#1	TAG_BX_TCTTCATATATT	73	G	GAG	AAA	65	50	10	GAG/AAA	0.7692	Del-In
Lib10^4_#1 100_Jm^2 U2OS Sel PCR#1	TAG_BX_TCTTCCACGTGG	-39	C	C	T	12	12	0	C/T	1	SNP
Lib10^4_#1 100_Jm^2 U2OS Sel PCR#1	TAG_BX_TCTTCCACGTGG	117	C	C	T	12	9	3	C/T	0.75	SNP
Lib10^4_#1 100_Jm^2 U2OS Sel PCR#1	TAG_BX_TCTTCTGATAGG	118	G	G	A	52	45	7	G/A	0.8654	SNP
Lib10^4_#1 100_Jm^2 U2OS Sel PCR#1	TAG_BX_TCTTCTTTGCTG	118	G	G	A	50	36	13	G/A	0.72	SNP
Lib10^4_#1 100_Jm^2 U2OS Sel PCR#1	TAG_BX_TCTTGCTCGGTC	121	G	G	A	66	47	18	G/A	0.7121	SNP
Lib10^4_#1 100_Jm^2 U2OS Sel PCR#1	TAG_BX_TCTTTCTCTGTT	98	A	AA	TT	48	31	10	AA/TT	0.6458	DNP
Lib10^4_#1 100_Jm^2 U2OS Sel PCR#1	TAG_BX_TCTTTCTCTGTT	98	A	A	T	48	7	10	A/T	0.1458	SNP
Lib10^4_#1 100_Jm^2 U2OS Sel PCR#1	TAG_BX_TCTTTTGTTGTA	118	G	G	A	51	38	11	G/A	0.7451	SNP
Lib10^4_#1 100_Jm^2 U2OS Sel PCR#1	TAG_BX_TGAAAGGGATTA	118	G	G	A	73	59	12	G/A	0.8082	SNP
Lib10^4_#1 100_Jm^2 U2OS Sel PCR#1	TAG_BX_TGAAGTGTTCCC	-56	G	G	A	97	95	2	G/A	0.9794	SNP
Lib10^4_#1 100_Jm^2 U2OS Sel PCR#1	TAG_BX_TGAAGTGTTCCC	121	G	G	A	97	75	19	G/A	0.7732	SNP
Lib10^4_#1 100_Jm^2 U2OS Sel PCR#1	TAG_BX_TGAATACTAGGT	12	T	T	A	134	113	19	T/A	0.8433	SNP
Lib10^4_#1 100_Jm^2 U2OS Sel PCR#1	TAG_BX_TGAATCTGTCAC	118	G	G	A	29	6	23	G/A	0.2069	SNP
Lib10^4_#1 100_Jm^2 U2OS Sel PCR#1	TAG_BX_TGAATCTGTCAC	125	C	C	T	29	20	9	C/T	0.6897	SNP
Lib10^4_#1 100_Jm^2 U2OS Sel PCR#1	TAG_BX_TGAATCTGTCAC	134	C	C	T	29	19	10	C/T	0.6552	SNP
Lib10^4_#1 100_Jm^2 U2OS Sel PCR#1	TAG_BX_TGATAGTTGATG	118	G	G	A	14	12	1	G/A	0.8571	SNP
Lib10^4_#1 100_Jm^2 U2OS Sel PCR#1	TAG_BX_TGATAGTTGATG	162	G	G	A	14	10	4	G/A	0.7143	SNP
Lib10^4_#1 100_Jm^2 U2OS Sel PCR#1	TAG_BX_TGATATAATATT	118	G	G	A	94	70	24	G/A	0.7447	SNP
Lib10^4_#1 100_Jm^2 U2OS Sel PCR#1	TAG_BX_TGATATATGCTT	118	G	G	A	109	93	15	G/A	0.8532	SNP
Lib10^4_#1 100_Jm^2 U2OS Sel PCR#1	TAG_BX_TGATATTTGTGC	118	G	G	A	87	66	20	G/A	0.7586	SNP
Lib10^4_#1 100_Jm^2 U2OS Sel PCR#1	TAG_BX_TGATGGACGCTG	5	G	G	A	27	26	1	G/A	0.963	SNP
Lib10^4_#1 100_Jm^2 U2OS Sel PCR#1	TAG_BX_TGATGGACGCTG	55	A	A	C	27	3	24	A/C	0.1111	SNP
Lib10^4_#1 100_Jm^2 U2OS Sel PCR#1	TAG_BX_TGATTCGTACTT	7	T	T	C	25	22	2	T/C	0.88	SNP
Lib10^4_#1 100_Jm^2 U2OS Sel PCR#1	TAG_BX_TGATTGGTATGG	91	G	G	A	22	19	2	G/A	0.8636	SNP
Lib10^4_#1 100_Jm^2 U2OS Sel PCR#1	TAG_BX_TGATTGGTTCGA	134	C	C	A	23	13	10	C/A	0.5652	SNP
Lib10^4_#1 100_Jm^2 U2OS Sel PCR#1	TAG_BX_TGATTTATGGCA	55	A	A	C	28	3	24	A/C	0.1071	SNP
Lib10^4_#1 100_Jm^2 U2OS Sel PCR#1	TAG_BX_TGATTTATGGCA	69	T	T	C	28	6	22	T/C	0.2143	SNP
Lib10^4_#1 100_Jm^2 U2OS Sel PCR#1	TAG_BX_TGATTTATGGCA	118	G	G	A	28	20	7	G/A	0.7143	SNP
Lib10^4_#1 100_Jm^2 U2OS Sel PCR#1	TAG_BX_TGATTTTGGGGG	121	G	G	A	107	84	23	G/A	0.785	SNP
Lib10^4_#1 100_Jm^2 U2OS Sel PCR#1	TAG_BX_TGCACATCGTTT	121	G	G	A	20	18	2	G/A	0.9	SNP
Lib10^4_#1 100_Jm^2 U2OS Sel PCR#1	TAG_BX_TGCACGACGTAT	118	G	G	A	42	35	7	G/A	0.8333	SNP
Lib10^4_#1 100_Jm^2 U2OS Sel PCR#1	TAG_BX_TGCAGTGTGCTA	118	G	G	A	61	48	12	G/A	0.7869	SNP
Lib10^4_#1 100_Jm^2 U2OS Sel PCR#1	TAG_BX_TGCCGGGTACGT	85	G	G	A	136	114	21	G/A	0.8382	SNP
Lib10^4_#1 100_Jm^2 U2OS Sel PCR#1	TAG_BX_TGCCTCTTACCC	134	C	C	A	11	9	2	C/A	0.8182	SNP
Lib10^4_#1 100_Jm^2 U2OS Sel PCR#1	TAG_BX_TGCGATCGTGGT	130	C	C	T	194	36	154	C/T	0.1856	SNP
Lib10^4_#1 100_Jm^2 U2OS Sel PCR#1	TAG_BX_TGCGATCGTGGT	131	C	C	T	195	84	75	C/T	0.4308	SNP
Lib10^4_#1 100_Jm^2 U2OS Sel PCR#1	TAG_BX_TGCGATCGTGGT	131	C	C	A	195	33	75	C/A	0.1692	SNP
Lib10^4_#1 100_Jm^2 U2OS Sel PCR#1	TAG_BX_TGCGCATGTTAC	131	C	C	T	27	22	5	C/T	0.8148	SNP
Lib10^4_#1 100_Jm^2 U2OS Sel PCR#1	TAG_BX_TGCGCGATCTTA	128	A	AT	TA	124	70	25	AT/TA	0.5645	DNP
Lib10^4_#1 100_Jm^2 U2OS Sel PCR#1	TAG_BX_TGCGCGATCTTA	128	A	A	T	124	28	25	A/T	0.2258	SNP
Lib10^4_#1 100_Jm^2 U2OS Sel PCR#1	TAG_BX_TGCGTGCCGGTG	118	G	G	A	141	111	29	G/A	0.7872	SNP
Lib10^4_#1 100_Jm^2 U2OS Sel PCR#1	TAG_BX_TGCTAGTATGGG	118	G	G	A	20	3	17	G/A	0.15	SNP
Lib10^4_#1 100_Jm^2 U2OS Sel PCR#1	TAG_BX_TGCTAGTATGGG	134	C	CCCC	GCTT	26	12	8	CCCC/GCTT	0.4615	Del-In
Lib10^4_#1 100_Jm^2 U2OS Sel PCR#1	TAG_BX_TGCTAGTATGGG	134	C	CCC	GCT	26	5	8	CCC/GCT	0.1923	Del-In
Lib10^4_#1 100_Jm^2 U2OS Sel PCR#1	TAG_BX_TGCTCGACCGGT	5	G	G	A	23	22	1	G/A	0.9565	SNP
Lib10^4_#1 100_Jm^2 U2OS Sel PCR#1	TAG_BX_TGCTCGTCCGTG	97	A	A	T	125	98	23	A/T	0.784	SNP
Lib10^4_#1 100_Jm^2 U2OS Sel PCR#1	TAG_BX_TGCTTCCAATTG	-35	T	T		57	56	1	T/	0.9825	1Del
Lib10^4_#1 100_Jm^2 U2OS Sel PCR#1	TAG_BX_TGCTTCCAATTG	121	G	G	T	56	40	15	G/T	0.7143	SNP
Lib10^4_#1 100_Jm^2 U2OS Sel PCR#1	TAG_BX_TGGAATCGACTA	118	G	G	A	33	28	3	G/A	0.8485	SNP
Lib10^4_#1 100_Jm^2 U2OS Sel PCR#1	TAG_BX_TGGATCTCCTAA	84	G	GG	AA	43	29	13	GG/AA	0.6744	DNP
Lib10^4_#1 100_Jm^2 U2OS Sel PCR#1	TAG_BX_TGGCACTATTTC	118	G	G	A	91	74	17	G/A	0.8132	SNP
Lib10^4_#1 100_Jm^2 U2OS Sel PCR#1	TAG_BX_TGGCTGGTTTAT	130	C	C	T	21	19	2	C/T	0.9048	SNP
Lib10^4_#1 100_Jm^2 U2OS Sel PCR#1	TAG_BX_TGGCTTAAACTG	118	G	G	A	101	78	21	G/A	0.7723	SNP
Lib10^4_#1 100_Jm^2 U2OS Sel PCR#1	TAG_BX_TGGGCTTTGAAG	130	C	C	T	67	50	13	C/T	0.7463	SNP
Lib10^4_#1 100_Jm^2 U2OS Sel PCR#1	TAG_BX_TGGGTCTTCAGA	125	C	C	A	319	233	83	C/A	0.7304	SNP
Lib10^4_#1 100_Jm^2 U2OS Sel PCR#1	TAG_BX_TGGGTCTTCAGA	130	C	C	A	316	226	78	C/A	0.7152	SNP
Lib10^4_#1 100_Jm^2 U2OS Sel PCR#1	TAG_BX_TGGGTCTTCAGA	187	C	CATC	TATT	359	213	106	CATC/TATT	0.5933	Del-In
Lib10^4_#1 100_Jm^2 U2OS Sel PCR#1	TAG_BX_TGGGTCTTCAGA	187	C	C	T	359	40	106	C/T	0.1114	SNP
Lib10^4_#1 100_Jm^2 U2OS Sel PCR#1	TAG_BX_TGGGTTACCAAT	70	C	CC	GT	65	43	14	CC/GT	0.6615	DNP
Lib10^4_#1 100_Jm^2 U2OS Sel PCR#1	TAG_BX_TGGGTTACCAAT	70	C	C	G	65	7	14	C/G	0.1077	SNP
Lib10^4_#1 100_Jm^2 U2OS Sel PCR#1	TAG_BX_TGGGTTACCAAT	118	G	G	A	59	7	52	G/A	0.1186	SNP
Lib10^4_#1 100_Jm^2 U2OS Sel PCR#1	TAG_BX_TGGTCGGCTGGT	-3	G	G	A	69	64	5	G/A	0.9275	SNP
Lib10^4_#1 100_Jm^2 U2OS Sel PCR#1	TAG_BX_TGGTCGGCTGGT	1	A	ATTTGAT		69	61	7	ATTTGAT/	0.8841	Del
Lib10^4_#1 100_Jm^2 U2OS Sel PCR#1	TAG_BX_TGGTGATCTGCG	118	G	G	A	81	67	14	G/A	0.8272	SNP
Lib10^4_#1 100_Jm^2 U2OS Sel PCR#1	TAG_BX_TGGTGCACCCTG	130	C	C	T	46	34	12	C/T	0.7391	SNP
Lib10^4_#1 100_Jm^2 U2OS Sel PCR#1	TAG_BX_TGGTGCACGGTT	5	G	G	C	43	40	3	G/C	0.9302	SNP
Lib10^4_#1 100_Jm^2 U2OS Sel PCR#1	TAG_BX_TGGTGGCTCCGC	7	T	T	A	16	16	0	T/A	1	SNP
Lib10^4_#1 100_Jm^2 U2OS Sel PCR#1	TAG_BX_TGGTGGCTCCGC	118	G	G	A	16	3	13	G/A	0.1875	SNP
Lib10^4_#1 100_Jm^2 U2OS Sel PCR#1	TAG_BX_TGGTGGTGTTTT	82	A	AAG	TAA	64	48	15	AAG/TAA	0.75	Del-In
Lib10^4_#1 100_Jm^2 U2OS Sel PCR#1	TAG_BX_TGGTGGTGTTTT	118	G	G	A	62	7	55	G/A	0.1129	SNP
Lib10^4_#1 100_Jm^2 U2OS Sel PCR#1	TAG_BX_TGGTGTGTGGAT	-27	C	C	T	57	56	1	C/T	0.9825	SNP
Lib10^4_#1 100_Jm^2 U2OS Sel PCR#1	TAG_BX_TGGTGTGTGGAT	130	C	C	T	57	42	14	C/T	0.7368	SNP
Lib10^4_#1 100_Jm^2 U2OS Sel PCR#1	TAG_BX_TGGTGTGTGGGA	65	G	GG	AT	72	55	12	GG/AT	0.7639	DNP
Lib10^4_#1 100_Jm^2 U2OS Sel PCR#1	TAG_BX_TGGTGTTTTTGT	85	G	GG	AA	118	89	18	GG/AA	0.7542	DNP
Lib10^4_#1 100_Jm^2 U2OS Sel PCR#1	TAG_BX_TGTACTGAAATG	131	C	C	T	32	22	10	C/T	0.6875	SNP
Lib10^4_#1 100_Jm^2 U2OS Sel PCR#1	TAG_BX_TGTATTTTTCGT	124	T	T	A	46	36	8	T/A	0.7826	SNP
Lib10^4_#1 100_Jm^2 U2OS Sel PCR#1	TAG_BX_TGTCATATTATA	118	G	G	A	106	85	17	G/A	0.8019	SNP
Lib10^4_#1 100_Jm^2 U2OS Sel PCR#1	TAG_BX_TGTCCCGGCGGG	118	G	G	A	56	42	11	G/A	0.75	SNP
Lib10^4_#1 100_Jm^2 U2OS Sel PCR#1	TAG_BX_TGTCGATTGTTG	85	G	G	A	41	35	5	G/A	0.8537	SNP
Lib10^4_#1 100_Jm^2 U2OS Sel PCR#1	TAG_BX_TGTCGCACCGTC	118	G	G	T	23	15	3	G/T	0.6522	SNP
Lib10^4_#1 100_Jm^2 U2OS Sel PCR#1	TAG_BX_TGTCGCACCGTC	118	G	G	A	23	5	3	G/A	0.2174	SNP
Lib10^4_#1 100_Jm^2 U2OS Sel PCR#1	TAG_BX_TGTCTAAGTAGA	121	G	GG	AA	261	165	57	GG/AA	0.6322	DNP
Lib10^4_#1 100_Jm^2 U2OS Sel PCR#1	TAG_BX_TGTCTCTCTGTT	118	G	G	A	69	56	13	G/A	0.8116	SNP
Lib10^4_#1 100_Jm^2 U2OS Sel PCR#1	TAG_BX_TGTGAGCTTATA	118	G	G	A	77	57	19	G/A	0.7403	SNP
Lib10^4_#1 100_Jm^2 U2OS Sel PCR#1	TAG_BX_TGTGCACATCGA	85	G	G	A	36	29	7	G/A	0.8056	SNP
Lib10^4_#1 100_Jm^2 U2OS Sel PCR#1	TAG_BX_TGTGCCGACTAA	66	G	G	A	215	44	171	G/A	0.2047	SNP
Lib10^4_#1 100_Jm^2 U2OS Sel PCR#1	TAG_BX_TGTGCCGACTAA	91	G	G	A	215	45	168	G/A	0.2093	SNP
Lib10^4_#1 100_Jm^2 U2OS Sel PCR#1	TAG_BX_TGTGCCGACTAA	126	G	GA	AC	235	123	88	GA/AC	0.5234	DNP
Lib10^4_#1 100_Jm^2 U2OS Sel PCR#1	TAG_BX_TGTGCGTGAACG	85	G	G	A	47	32	13	G/A	0.6809	SNP
Lib10^4_#1 100_Jm^2 U2OS Sel PCR#1	TAG_BX_TGTGGCCCGTTG	-15	T	T	C	30	27	3	T/C	0.9	SNP
Lib10^4_#1 100_Jm^2 U2OS Sel PCR#1	TAG_BX_TGTGGGTCACGT	31	A	AG	GA	19	14	0	AG/GA	0.7368	DNP
Lib10^4_#1 100_Jm^2 U2OS Sel PCR#1	TAG_BX_TGTGGGTCACGT	31	A	A	G	19	5	0	A/G	0.2632	SNP
Lib10^4_#1 100_Jm^2 U2OS Sel PCR#1	TAG_BX_TGTGGGTCACGT	91	G	G	A	14	14	0	G/A	1	SNP
Lib10^4_#1 100_Jm^2 U2OS Sel PCR#1	TAG_BX_TGTGGTGGATTG	118	G	G	A	58	49	9	G/A	0.8448	SNP
Lib10^4_#1 100_Jm^2 U2OS Sel PCR#1	TAG_BX_TGTGGTTCCGAG	5	G	G	A	21	20	1	G/A	0.9524	SNP
Lib10^4_#1 100_Jm^2 U2OS Sel PCR#1	TAG_BX_TGTGTGCGCAGT	118	G	G	A	80	64	16	G/A	0.8	SNP
Lib10^4_#1 100_Jm^2 U2OS Sel PCR#1	TAG_BX_TGTGTTTTGATT	108	C	C	T	65	18	47	C/T	0.2769	SNP
Lib10^4_#1 100_Jm^2 U2OS Sel PCR#1	TAG_BX_TGTGTTTTGATT	118	G	G	A	65	35	29	G/A	0.5385	SNP
Lib10^4_#1 100_Jm^2 U2OS Sel PCR#1	TAG_BX_TGTGTTTTGATT	125	C	C	G	65	17	46	C/G	0.2615	SNP
Lib10^4_#1 100_Jm^2 U2OS Sel PCR#1	TAG_BX_TGTTATACTCCG	134	C	C	A	17	11	6	C/A	0.6471	SNP
Lib10^4_#1 100_Jm^2 U2OS Sel PCR#1	TAG_BX_TGTTCAACCCGT	101	C	C	T	103	81	22	C/T	0.7864	SNP
Lib10^4_#1 100_Jm^2 U2OS Sel PCR#1	TAG_BX_TGTTCAACCCGT	108	C	C	T	103	79	21	C/T	0.767	SNP
Lib10^4_#1 100_Jm^2 U2OS Sel PCR#1	TAG_BX_TGTTCAACCCGT	117	C	C	A	103	82	18	C/A	0.7961	SNP
Lib10^4_#1 100_Jm^2 U2OS Sel PCR#1	TAG_BX_TGTTCAACCCGT	170	C	C	T	103	75	28	C/T	0.7282	SNP
Lib10^4_#1 100_Jm^2 U2OS Sel PCR#1	TAG_BX_TGTTCCTGTTTT	-13	A	AC	GG	40	37	0	AC/GG	0.925	DNP
Lib10^4_#1 100_Jm^2 U2OS Sel PCR#1	TAG_BX_TGTTGCCGGGAT	130	C	C	T	61	35	25	C/T	0.5738	SNP
Lib10^4_#1 100_Jm^2 U2OS Sel PCR#1	TAG_BX_TGTTGCGACATT	85	G	GG	AA	53	45	6	GG/AA	0.8491	DNP
Lib10^4_#1 100_Jm^2 U2OS Sel PCR#1	TAG_BX_TGTTGGACAGCT	118	G	G	A	47	41	5	G/A	0.8723	SNP
Lib10^4_#1 100_Jm^2 U2OS Sel PCR#1	TAG_BX_TGTTGTGCCGAC	130	C	C	T	101	76	25	C/T	0.7525	SNP
Lib10^4_#1 100_Jm^2 U2OS Sel PCR#1	TAG_BX_TGTTTGGTCGAT	118	G	G	A	21	17	4	G/A	0.8095	SNP
Lib10^4_#1 100_Jm^2 U2OS Sel PCR#1	TAG_BX_TGTTTTGAAAGG	135	C	CC	AT	76	47	15	CC/AT	0.6184	DNP
Lib10^4_#1 100_Jm^2 U2OS Sel PCR#1	TAG_BX_TGTTTTGAAAGG	135	C	C	A	76	14	15	C/A	0.1842	SNP
Lib10^4_#1 100_Jm^2 U2OS Sel PCR#1	TAG_BX_TGTTTTGTTTGC	5	G	G	A	20	19	1	G/A	0.95	SNP
Lib10^4_#1 100_Jm^2 U2OS Sel PCR#1	TAG_BX_TGTTTTGTTTGC	118	G	G	A	20	3	17	G/A	0.15	SNP
Lib10^4_#1 100_Jm^2 U2OS Sel PCR#1	TAG_BX_TTAACCATGGTA	71	C	C	A	219	151	56	C/A	0.6895	SNP
Lib10^4_#1 100_Jm^2 U2OS Sel PCR#1	TAG_BX_TTACACGGTTAG	118	G	G	A	39	26	12	G/A	0.6667	SNP
Lib10^4_#1 100_Jm^2 U2OS Sel PCR#1	TAG_BX_TTACAGATATCT	86	G	GAG	TAA	55	41	11	GAG/TAA	0.7455	Del-In
Lib10^4_#1 100_Jm^2 U2OS Sel PCR#1	TAG_BX_TTACAGTTCTGA	118	G	G	A	28	24	3	G/A	0.8571	SNP
Lib10^4_#1 100_Jm^2 U2OS Sel PCR#1	TAG_BX_TTACAGTTCTGA	126	G	G	A	28	23	5	G/A	0.8214	SNP
Lib10^4_#1 100_Jm^2 U2OS Sel PCR#1	TAG_BX_TTACAGTTCTGA	175	G	GG	AA	31	22	6	GG/AA	0.7097	DNP
Lib10^4_#1 100_Jm^2 U2OS Sel PCR#1	TAG_BX_TTACCCGATTTT	118	G	G	A	14	13	1	G/A	0.9286	SNP
Lib10^4_#1 100_Jm^2 U2OS Sel PCR#1	TAG_BX_TTACCGCGGGGT	130	C	C	T	60	47	13	C/T	0.7833	SNP
Lib10^4_#1 100_Jm^2 U2OS Sel PCR#1	TAG_BX_TTACGGAAGAGG	118	G	G	A	89	68	18	G/A	0.764	SNP
Lib10^4_#1 100_Jm^2 U2OS Sel PCR#1	TAG_BX_TTACGTGATCTA	118	G	G	A	40	34	6	G/A	0.85	SNP
Lib10^4_#1 100_Jm^2 U2OS Sel PCR#1	TAG_BX_TTACTGGGTCGA	118	G	G	A	40	29	11	G/A	0.725	SNP
Lib10^4_#1 100_Jm^2 U2OS Sel PCR#1	TAG_BX_TTACTTTCCTCG	5	G	G	A	30	27	3	G/A	0.9	SNP
Lib10^4_#1 100_Jm^2 U2OS Sel PCR#1	TAG_BX_TTACTTTCCTCG	118	G	G	A	29	3	26	G/A	0.1034	SNP
Lib10^4_#1 100_Jm^2 U2OS Sel PCR#1	TAG_BX_TTAGATGTTGAA	11	A	A	T	30	21	9	A/T	0.7	SNP
Lib10^4_#1 100_Jm^2 U2OS Sel PCR#1	TAG_BX_TTAGATGTTGAA	25	C	C	A	30	19	10	C/A	0.6333	SNP
Lib10^4_#1 100_Jm^2 U2OS Sel PCR#1	TAG_BX_TTAGATGTTGAA	117	C	C	T	30	13	16	C/T	0.4333	SNP
Lib10^4_#1 100_Jm^2 U2OS Sel PCR#1	TAG_BX_TTAGATGTTGAA	118	G	G	A	30	10	19	G/A	0.3333	SNP
Lib10^4_#1 100_Jm^2 U2OS Sel PCR#1	TAG_BX_TTAGATGTTGAA	152	T	T	A	30	12	18	T/A	0.4	SNP
Lib10^4_#1 100_Jm^2 U2OS Sel PCR#1	TAG_BX_TTAGATGTTGAA	161	C	C	A	30	13	17	C/A	0.4333	SNP
Lib10^4_#1 100_Jm^2 U2OS Sel PCR#1	TAG_BX_TTAGATGTTGAA	170	C	CC	AT	30	11	19	CC/AT	0.3667	DNP
Lib10^4_#1 100_Jm^2 U2OS Sel PCR#1	TAG_BX_TTATATTGCGGA	118	G	G	A	156	123	31	G/A	0.7885	SNP
Lib10^4_#1 100_Jm^2 U2OS Sel PCR#1	TAG_BX_TTATGACGTCGT	115	T	TTC	CTT	65	34	15	TTC/CTT	0.5231	Del-In
Lib10^4_#1 100_Jm^2 U2OS Sel PCR#1	TAG_BX_TTATGACGTCGT	115	T	T	C	65	16	15	T/C	0.2462	SNP
Lib10^4_#1 100_Jm^2 U2OS Sel PCR#1	TAG_BX_TTATGACGTCGT	118	G	G	A	49	6	43	G/A	0.1224	SNP
Lib10^4_#1 100_Jm^2 U2OS Sel PCR#1	TAG_BX_TTATGCGGCTCT	130	C	C	A	25	18	7	C/A	0.72	SNP
Lib10^4_#1 100_Jm^2 U2OS Sel PCR#1	TAG_BX_TTCAATACGCTC	130	C	C	T	33	30	3	C/T	0.9091	SNP
Lib10^4_#1 100_Jm^2 U2OS Sel PCR#1	TAG_BX_TTCAATACGCTC	153	C	C	T	33	27	6	C/T	0.8182	SNP
Lib10^4_#1 100_Jm^2 U2OS Sel PCR#1	TAG_BX_TTCACAAAGATC	100	T	T	C	24	15	9	T/C	0.625	SNP
Lib10^4_#1 100_Jm^2 U2OS Sel PCR#1	TAG_BX_TTCACAAAGATC	121	G	G	A	24	15	8	G/A	0.625	SNP
Lib10^4_#1 100_Jm^2 U2OS Sel PCR#1	TAG_BX_TTCCACTAAAGT	121	G	G	A	86	70	14	G/A	0.814	SNP
Lib10^4_#1 100_Jm^2 U2OS Sel PCR#1	TAG_BX_TTCCGTGCACCC	118	G	G	A	42	33	8	G/A	0.7857	SNP
Lib10^4_#1 100_Jm^2 U2OS Sel PCR#1	TAG_BX_TTCCTTAGCGAT	73	G	GAG	AAA	230	161	43	GAG/AAA	0.7	Del-In
Lib10^4_#1 100_Jm^2 U2OS Sel PCR#1	TAG_BX_TTCCTTAGCGAT	73	G	G	A	230	25	43	G/A	0.1087	SNP
Lib10^4_#1 100_Jm^2 U2OS Sel PCR#1	TAG_BX_TTCGCAAACTAT	71	C	C	T	64	50	10	C/T	0.7812	SNP
Lib10^4_#1 100_Jm^2 U2OS Sel PCR#1	TAG_BX_TTCGCAAACTAT	108	C	C	A	64	55	8	C/A	0.8594	SNP
Lib10^4_#1 100_Jm^2 U2OS Sel PCR#1	TAG_BX_TTCTACGTGCGT	70	C	C	T	41	35	5	C/T	0.8537	SNP
Lib10^4_#1 100_Jm^2 U2OS Sel PCR#1	TAG_BX_TTCTACGTGCGT	130	C	C	T	41	32	9	C/T	0.7805	SNP
Lib10^4_#1 100_Jm^2 U2OS Sel PCR#1	TAG_BX_TTCTAGGTTTTC	118	G	G	A	52	36	16	G/A	0.6923	SNP
Lib10^4_#1 100_Jm^2 U2OS Sel PCR#1	TAG_BX_TTCTAGGTTTTC	197	G	G	A	52	34	18	G/A	0.6538	SNP
Lib10^4_#1 100_Jm^2 U2OS Sel PCR#1	TAG_BX_TTCTATAGTTTA	73	G	GAG	TAA	76	51	15	GAG/TAA	0.6711	Del-In
Lib10^4_#1 100_Jm^2 U2OS Sel PCR#1	TAG_BX_TTCTATAGTTTA	73	G	G	T	76	9	15	G/T	0.1184	SNP
Lib10^4_#1 100_Jm^2 U2OS Sel PCR#1	TAG_BX_TTCTATCACCTG	121	G	G	A	48	38	9	G/A	0.7917	SNP
Lib10^4_#1 100_Jm^2 U2OS Sel PCR#1	TAG_BX_TTCTATGGGTGT	130	C	C	T	45	33	11	C/T	0.7333	SNP
Lib10^4_#1 100_Jm^2 U2OS Sel PCR#1	TAG_BX_TTCTCAATGAGA	-15	T	T	G	34	34	0	T/G	1	SNP
Lib10^4_#1 100_Jm^2 U2OS Sel PCR#1	TAG_BX_TTCTCAATGAGA	24	C	C	T	34	31	3	C/T	0.9118	SNP
Lib10^4_#1 100_Jm^2 U2OS Sel PCR#1	TAG_BX_TTCTCAATGAGA	129	T	TCCTTC	CCTTTT	52	26	7	TCCTTC/CCTTTT	0.5	Del-In
Lib10^4_#1 100_Jm^2 U2OS Sel PCR#1	TAG_BX_TTCTCAATGAGA	129	T	TCC	CCT	52	11	7	TCC/CCT	0.2115	Del-In
Lib10^4_#1 100_Jm^2 U2OS Sel PCR#1	TAG_BX_TTCTCAATGAGA	129	T	T	C	52	7	7	T/C	0.1346	SNP
Lib10^4_#1 100_Jm^2 U2OS Sel PCR#1	TAG_BX_TTCTCTGGACCG	118	G	G	A	216	175	40	G/A	0.8102	SNP
Lib10^4_#1 100_Jm^2 U2OS Sel PCR#1	TAG_BX_TTCTCTTTGCCG	85	G	G	A	51	43	8	G/A	0.8431	SNP
Lib10^4_#1 100_Jm^2 U2OS Sel PCR#1	TAG_BX_TTCTCTTTGCCG	118	G	G	A	51	6	45	G/A	0.1176	SNP
Lib10^4_#1 100_Jm^2 U2OS Sel PCR#1	TAG_BX_TTCTGCAGGTTA	97	A	A	T	43	30	13	A/T	0.6977	SNP
Lib10^4_#1 100_Jm^2 U2OS Sel PCR#1	TAG_BX_TTCTGTTCGGAG	130	C	C	T	50	34	16	C/T	0.68	SNP
Lib10^4_#1 100_Jm^2 U2OS Sel PCR#1	TAG_BX_TTCTTGTGGTAT	115	T	TTC	CTT	137	85	24	TTC/CTT	0.6204	Del-In
Lib10^4_#1 100_Jm^2 U2OS Sel PCR#1	TAG_BX_TTCTTGTGGTAT	115	T	T	C	137	27	24	T/C	0.1971	SNP
Lib10^4_#1 100_Jm^2 U2OS Sel PCR#1	TAG_BX_TTCTTTACGCTG	134	C	C	A	30	22	8	C/A	0.7333	SNP
Lib10^4_#1 100_Jm^2 U2OS Sel PCR#1	TAG_BX_TTGAGCTAGGGA	118	G	G	A	33	4	29	G/A	0.1212	SNP
Lib10^4_#1 100_Jm^2 U2OS Sel PCR#1	TAG_BX_TTGAGCTAGGGA	121	G	G	A	33	20	13	G/A	0.6061	SNP
Lib10^4_#1 100_Jm^2 U2OS Sel PCR#1	TAG_BX_TTGAGCTGTCCT	126	G	G	T	22	14	8	G/T	0.6364	SNP
Lib10^4_#1 100_Jm^2 U2OS Sel PCR#1	TAG_BX_TTGAGTGGTGTC	100	T	T	C	63	52	10	T/C	0.8254	SNP
Lib10^4_#1 100_Jm^2 U2OS Sel PCR#1	TAG_BX_TTGAGTGGTGTC	114	C	CT	TA	76	53	10	CT/TA	0.6974	DNP
Lib10^4_#1 100_Jm^2 U2OS Sel PCR#1	TAG_BX_TTGAGTGGTGTC	114	C	C	T	76	13	10	C/T	0.1711	SNP
Lib10^4_#1 100_Jm^2 U2OS Sel PCR#1	TAG_BX_TTGCCGCTAGGT	121	G	G	A	55	41	13	G/A	0.7455	SNP
Lib10^4_#1 100_Jm^2 U2OS Sel PCR#1	TAG_BX_TTGCCGGGTTGA	84	G	GG	AA	311	235	58	GG/AA	0.7556	DNP
Lib10^4_#1 100_Jm^2 U2OS Sel PCR#1	TAG_BX_TTGCGTGGTTAT	118	G	G	A	135	106	28	G/A	0.7852	SNP
Lib10^4_#1 100_Jm^2 U2OS Sel PCR#1	TAG_BX_TTGCTAGTTTGC	130	C	C	T	41	32	9	C/T	0.7805	SNP
Lib10^4_#1 100_Jm^2 U2OS Sel PCR#1	TAG_BX_TTGCTCGCTTTA	117	C	C	T	31	6	25	C/T	0.1935	SNP
Lib10^4_#1 100_Jm^2 U2OS Sel PCR#1	TAG_BX_TTGCTCGCTTTA	131	C	CT	AA	34	14	16	CT/AA	0.4118	DNP
Lib10^4_#1 100_Jm^2 U2OS Sel PCR#1	TAG_BX_TTGGAGGATTGT	99	A	A	G	24	20	4	A/G	0.8333	SNP
Lib10^4_#1 100_Jm^2 U2OS Sel PCR#1	TAG_BX_TTGGATGAATAT	118	G	G	A	74	56	18	G/A	0.7568	SNP
Lib10^4_#1 100_Jm^2 U2OS Sel PCR#1	TAG_BX_TTGGATGAATAT	157	A	AG		74	53	21	AG/	0.7162	Del
Lib10^4_#1 100_Jm^2 U2OS Sel PCR#1	TAG_BX_TTGGATGAATAT	195	G	G	A	74	49	24	G/A	0.6622	SNP
Lib10^4_#1 100_Jm^2 U2OS Sel PCR#1	TAG_BX_TTGGCCAGTTTC	96	T	T	A	45	36	8	T/A	0.8	SNP
Lib10^4_#1 100_Jm^2 U2OS Sel PCR#1	TAG_BX_TTGGCGAGGCCA	118	G	G	A	87	74	13	G/A	0.8506	SNP
Lib10^4_#1 100_Jm^2 U2OS Sel PCR#1	TAG_BX_TTGGCTCGTTAC	86	G	G	A	108	82	24	G/A	0.7593	SNP
Lib10^4_#1 100_Jm^2 U2OS Sel PCR#1	TAG_BX_TTGGCTCGTTAC	118	G	G	A	108	86	20	G/A	0.7963	SNP
Lib10^4_#1 100_Jm^2 U2OS Sel PCR#1	TAG_BX_TTGGCTGAATCG	5	G	G	A	31	27	3	G/A	0.871	SNP
Lib10^4_#1 100_Jm^2 U2OS Sel PCR#1	TAG_BX_TTGGCTTAATTT	66	G	GG	AA	77	63	10	GG/AA	0.8182	DNP
Lib10^4_#1 100_Jm^2 U2OS Sel PCR#1	TAG_BX_TTGGGCCTCTAG	130	C	C	T	49	35	14	C/T	0.7143	SNP
Lib10^4_#1 100_Jm^2 U2OS Sel PCR#1	TAG_BX_TTGGGGTCTCGT	70	C	CCC	TCA	312	229	55	CCC/TCA	0.734	Del-In
Lib10^4_#1 100_Jm^2 U2OS Sel PCR#1	TAG_BX_TTGGGTCAATTG	118	G	G	A	36	24	10	G/A	0.6667	SNP
Lib10^4_#1 100_Jm^2 U2OS Sel PCR#1	TAG_BX_TTGGGTTTTATT	64	G	G	A	81	65	14	G/A	0.8025	SNP
Lib10^4_#1 100_Jm^2 U2OS Sel PCR#1	TAG_BX_TTGGGTTTTATT	126	G	G	C	81	57	23	G/C	0.7037	SNP
Lib10^4_#1 100_Jm^2 U2OS Sel PCR#1	TAG_BX_TTGGTCGGCGAT	118	G	G	A	31	26	5	G/A	0.8387	SNP
Lib10^4_#1 100_Jm^2 U2OS Sel PCR#1	TAG_BX_TTGGTGTCTTTG	82	A	A	G	35	29	6	A/G	0.8286	SNP
Lib10^4_#1 100_Jm^2 U2OS Sel PCR#1	TAG_BX_TTGTATAGTGTT	121	G	G	A	66	52	12	G/A	0.7879	SNP
Lib10^4_#1 100_Jm^2 U2OS Sel PCR#1	TAG_BX_TTGTATTCTTCT	55	A	A	C	58	6	52	A/C	0.1034	SNP
Lib10^4_#1 100_Jm^2 U2OS Sel PCR#1	TAG_BX_TTGTATTCTTCT	118	G	G	A	58	49	9	G/A	0.8448	SNP
Lib10^4_#1 100_Jm^2 U2OS Sel PCR#1	TAG_BX_TTGTCATATGTT	118	G	G	A	142	108	28	G/A	0.7606	SNP
Lib10^4_#1 100_Jm^2 U2OS Sel PCR#1	TAG_BX_TTGTCCCGTATC	61	G	G	A	239	186	52	G/A	0.7782	SNP
Lib10^4_#1 100_Jm^2 U2OS Sel PCR#1	TAG_BX_TTGTCCCGTATC	95	C	C	G	239	181	58	C/G	0.7573	SNP
Lib10^4_#1 100_Jm^2 U2OS Sel PCR#1	TAG_BX_TTGTCCCGTATC	111	C	C	T	238	178	59	C/T	0.7479	SNP
Lib10^4_#1 100_Jm^2 U2OS Sel PCR#1	TAG_BX_TTGTCCCGTATC	117	C	C	T	238	176	60	C/T	0.7395	SNP
Lib10^4_#1 100_Jm^2 U2OS Sel PCR#1	TAG_BX_TTGTCTGGGTTT	64	G	GGG	AGT	90	76	7	GGG/AGT	0.8444	Del-In
Lib10^4_#1 100_Jm^2 U2OS Sel PCR#1	TAG_BX_TTGTCTGGGTTT	118	G	G	A	83	72	11	G/A	0.8675	SNP
Lib10^4_#1 100_Jm^2 U2OS Sel PCR#1	TAG_BX_TTGTTGGTGGTG	118	G	G	A	56	44	11	G/A	0.7857	SNP
Lib10^4_#1 100_Jm^2 U2OS Sel PCR#1	TAG_BX_TTTAAAAAGTCC	118	G	G	A	46	37	9	G/A	0.8043	SNP
Lib10^4_#1 100_Jm^2 U2OS Sel PCR#1	TAG_BX_TTTAATGGAAGC	121	G	GG	AA	52	35	9	GG/AA	0.6731	DNP
Lib10^4_#1 100_Jm^2 U2OS Sel PCR#1	TAG_BX_TTTAATGGAAGC	121	G	G	A	52	8	9	G/A	0.1538	SNP
Lib10^4_#1 100_Jm^2 U2OS Sel PCR#1	TAG_BX_TTTACGTGTACA	117	C	C	T	46	39	6	C/T	0.8478	SNP
Lib10^4_#1 100_Jm^2 U2OS Sel PCR#1	TAG_BX_TTTACGTGTACA	140	C	CC	TA	52	38	9	CC/TA	0.7308	DNP
Lib10^4_#1 100_Jm^2 U2OS Sel PCR#1	TAG_BX_TTTAGTGAGCAG	118	G	G	A	62	45	16	G/A	0.7258	SNP
Lib10^4_#1 100_Jm^2 U2OS Sel PCR#1	TAG_BX_TTTATAGGTACG	118	G	G	A	29	20	7	G/A	0.6897	SNP
Lib10^4_#1 100_Jm^2 U2OS Sel PCR#1	TAG_BX_TTTATGGGTCTC	85	G	G	A	28	20	8	G/A	0.7143	SNP
Lib10^4_#1 100_Jm^2 U2OS Sel PCR#1	TAG_BX_TTTATTCTAATT	121	G	G	A	214	157	55	G/A	0.7336	SNP
Lib10^4_#1 100_Jm^2 U2OS Sel PCR#1	TAG_BX_TTTCCGGTACTG	74	A	AG	TA	174	131	29	AG/TA	0.7529	DNP
Lib10^4_#1 100_Jm^2 U2OS Sel PCR#1	TAG_BX_TTTCCTCGTGGT	91	G	G	C	56	42	14	G/C	0.75	SNP
Lib10^4_#1 100_Jm^2 U2OS Sel PCR#1	TAG_BX_TTTCCTCGTGGT	126	G	G	A	56	41	15	G/A	0.7321	SNP
Lib10^4_#1 100_Jm^2 U2OS Sel PCR#1	TAG_BX_TTTCCTCGTGGT	130	C	C	A	56	6	48	C/A	0.1071	SNP
Lib10^4_#1 100_Jm^2 U2OS Sel PCR#1	TAG_BX_TTTCGGCTGGCT	117	C	C	A	26	15	11	C/A	0.5769	SNP
Lib10^4_#1 100_Jm^2 U2OS Sel PCR#1	TAG_BX_TTTCGGCTGGCT	130	C	C	T	26	14	10	C/T	0.5385	SNP
Lib10^4_#1 100_Jm^2 U2OS Sel PCR#1	TAG_BX_TTTCTAGTTGGT	5	G	G	A	53	51	1	G/A	0.9623	SNP
Lib10^4_#1 100_Jm^2 U2OS Sel PCR#1	TAG_BX_TTTCTGTGCATT	86	G	G	A	51	39	11	G/A	0.7647	SNP
Lib10^4_#1 100_Jm^2 U2OS Sel PCR#1	TAG_BX_TTTCTGTGCATT	118	G	G	A	51	38	12	G/A	0.7451	SNP
Lib10^4_#1 100_Jm^2 U2OS Sel PCR#1	TAG_BX_TTTGAAGAAAAC	121	G	G	A	52	41	10	G/A	0.7885	SNP
Lib10^4_#1 100_Jm^2 U2OS Sel PCR#1	TAG_BX_TTTGCACGATTT	80	C	C	A	23	20	3	C/A	0.8696	SNP
Lib10^4_#1 100_Jm^2 U2OS Sel PCR#1	TAG_BX_TTTGCACGATTT	86	G	G	T	23	20	2	G/T	0.8696	SNP
Lib10^4_#1 100_Jm^2 U2OS Sel PCR#1	TAG_BX_TTTGCGTCTAGG	117	C	C	T	13	9	4	C/T	0.6923	SNP
Lib10^4_#1 100_Jm^2 U2OS Sel PCR#1	TAG_BX_TTTGCGTCTAGG	118	G	G	A	13	2	10	G/A	0.1538	SNP
Lib10^4_#1 100_Jm^2 U2OS Sel PCR#1	TAG_BX_TTTGCGTGCTCT	81	A	AA	TT	98	66	29	AA/TT	0.6735	DNP
Lib10^4_#1 100_Jm^2 U2OS Sel PCR#1	TAG_BX_TTTGGAACTCTT	118	G	G	A	46	31	14	G/A	0.6739	SNP
Lib10^4_#1 100_Jm^2 U2OS Sel PCR#1	TAG_BX_TTTGGCATTTTT	73	G	GAG	AAA	47	36	7	GAG/AAA	0.766	Del-In
Lib10^4_#1 100_Jm^2 U2OS Sel PCR#1	TAG_BX_TTTGGTCCCTGT	130	C	C	T	158	119	36	C/T	0.7532	SNP
Lib10^4_#1 100_Jm^2 U2OS Sel PCR#1	TAG_BX_TTTGTACAGATT	121	G	G	A	52	45	7	G/A	0.8654	SNP
Lib10^4_#1 100_Jm^2 U2OS Sel PCR#1	TAG_BX_TTTGTTCCCTCT	84	G	G	A	45	35	10	G/A	0.7778	SNP
Lib10^4_#1 100_Jm^2 U2OS Sel PCR#1	TAG_BX_TTTGTTCCCTCT	89	C	CAGA	GAAAGT	45	17	11	CAGA/GAAAGT	0.3778	Del-In
Lib10^4_#1 100_Jm^2 U2OS Sel PCR#1	TAG_BX_TTTGTTCCCTCT	89	C	C	GAA	45	13	11	C/GAA	0.2889	Ins
Lib10^4_#1 100_Jm^2 U2OS Sel PCR#1	TAG_BX_TTTGTTCCCTCT	118	G	G	A	45	5	40	G/A	0.1111	SNP
Lib10^4_#1 100_Jm^2 U2OS Sel PCR#1	TAG_BX_TTTGTTCTTCTG	134	C	C	A	93	70	23	C/A	0.7527	SNP
Lib10^4_#1 100_Jm^2 U2OS Sel PCR#1	TAG_BX_TTTTACTGGATA	130	C	C	T	65	49	15	C/T	0.7538	SNP
Lib10^4_#1 100_Jm^2 U2OS Sel PCR#1	TAG_BX_TTTTAGAACATT	118	G	G	A	33	28	5	G/A	0.8485	SNP
Lib10^4_#1 100_Jm^2 U2OS Sel PCR#1	TAG_BX_TTTTATCTTGAT	70	C	CC	TT	23	15	5	CC/TT	0.6522	DNP
Lib10^4_#1 100_Jm^2 U2OS Sel PCR#1	TAG_BX_TTTTATCTTGAT	70	C	C	T	23	3	5	C/T	0.1304	SNP
Lib10^4_#1 100_Jm^2 U2OS Sel PCR#1	TAG_BX_TTTTATCTTGAT	95	C	C	G	20	15	5	C/G	0.75	SNP
Lib10^4_#1 100_Jm^2 U2OS Sel PCR#1	TAG_BX_TTTTATCTTGAT	125	C	C	T	20	14	5	C/T	0.7	SNP
Lib10^4_#1 100_Jm^2 U2OS Sel PCR#1	TAG_BX_TTTTATCTTGAT	130	C	C	T	20	13	7	C/T	0.65	SNP
Lib10^4_#1 100_Jm^2 U2OS Sel PCR#1	TAG_BX_TTTTATCTTGAT	147	C	C	G	20	14	6	C/G	0.7	SNP
Lib10^4_#1 100_Jm^2 U2OS Sel PCR#1	TAG_BX_TTTTATCTTGAT	184	C	CC	TT	22	13	7	CC/TT	0.5909	DNP
Lib10^4_#1 100_Jm^2 U2OS Sel PCR#1	TAG_BX_TTTTCACTCCTA	117	C	C	T	18	12	5	C/T	0.6667	SNP
Lib10^4_#1 100_Jm^2 U2OS Sel PCR#1	TAG_BX_TTTTCGGTTAAT	70	C	C	T	42	32	8	C/T	0.7619	SNP
Lib10^4_#1 100_Jm^2 U2OS Sel PCR#1	TAG_BX_TTTTCGGTTAAT	95	C	C	G	42	35	7	C/G	0.8333	SNP
Lib10^4_#1 100_Jm^2 U2OS Sel PCR#1	TAG_BX_TTTTCTACAGCA	118	G	G	A	61	48	13	G/A	0.7869	SNP
Lib10^4_#1 100_Jm^2 U2OS Sel PCR#1	TAG_BX_TTTTCTACAGCA	175	G	G	A	61	44	17	G/A	0.7213	SNP
Lib10^4_#1 100_Jm^2 U2OS Sel PCR#1	TAG_BX_TTTTGCGATGCT	118	G	G	A	60	45	13	G/A	0.75	SNP
Lib10^4_#1 100_Jm^2 U2OS Sel PCR#1	TAG_BX_TTTTGTAAACAC	-31	T	T	A	138	137	1	T/A	0.9928	SNP
Lib10^4_#1 100_Jm^2 U2OS Sel PCR#1	TAG_BX_TTTTGTAAACAC	95	C	C	G	138	116	20	C/G	0.8406	SNP
Lib10^4_#1 100_Jm^2 U2OS Sel PCR#1	TAG_BX_TTTTGTAAACAC	153	C	C	T	136	111	25	C/T	0.8162	SNP
Lib10^4_#1 100_Jm^2 U2OS Sel PCR#1	TAG_BX_TTTTTATCTTCG	118	G	G	A	33	29	3	G/A	0.8788	SNP
Lib10^4_#1 100_Jm^2 U2OS Sel PCR#1	TAG_BX_TTTTTGAGGTTG	122	G	G	A	25	22	3	G/A	0.88	SNP
Lib10^4_#1 100_Jm^2 U2OS Sel PCR#1	TAG_BX_TTTTTGGTTTAC	118	G	G	A	48	37	10	G/A	0.7708	SNP
Lib10^4_#1 100_Jm^2 U2OS Sel PCR#1	TAG_BX_TTTTTGTCTGCC	121	G	G	T	126	101	21	G/T	0.8016	SNP
Lib10^4_#1 100_Jm^2 U2OS Sel PCR#1	TAG_BX_TTTTTTGACTTG	117	C	C	A	33	24	9	C/A	0.7273	SNP
Lib10^4_#1 100_Jm^2 U2OS Sel PCR#1	TAG_BX_TTTTTTTAGGTC	8	A	A	T	223	200	23	A/T	0.8969	SNP
Lib10^4_#1 200_Jm^2 U2OS Sel PCR#1	TAG_BX_AAACTCAAGAGC	131	C	C	T	13	10	1	C/T	0.7692	SNP
Lib10^4_#1 200_Jm^2 U2OS Sel PCR#1	TAG_BX_AAAGGTGTTTTC	85	G	G	A	103	87	15	G/A	0.8447	SNP
Lib10^4_#1 200_Jm^2 U2OS Sel PCR#1	TAG_BX_AAATGCGGTCTC	131	C	C	T	97	74	22	C/T	0.7629	SNP
Lib10^4_#1 200_Jm^2 U2OS Sel PCR#1	TAG_BX_AAATTGATAGGG	130	C	C	A	281	217	57	C/A	0.7722	SNP
Lib10^4_#1 200_Jm^2 U2OS Sel PCR#1	TAG_BX_AAATTGATAGGG	170	C	C	T	281	211	69	C/T	0.7509	SNP
Lib10^4_#1 200_Jm^2 U2OS Sel PCR#1	TAG_BX_AAATTGATAGGG	187	C	CATC	AATT	312	199	80	CATC/AATT	0.6378	Del-In
Lib10^4_#1 200_Jm^2 U2OS Sel PCR#1	TAG_BX_AACCCTCGTCAG	5	G	G	A	19	17	2	G/A	0.8947	SNP
Lib10^4_#1 200_Jm^2 U2OS Sel PCR#1	TAG_BX_AACGTTGGCTAA	112	G	GAC	TAA	56	40	7	GAC/TAA	0.7143	Del-In
Lib10^4_#1 200_Jm^2 U2OS Sel PCR#1	TAG_BX_AACTGGGTAACC	118	G	G	A	70	52	14	G/A	0.7429	SNP
Lib10^4_#1 200_Jm^2 U2OS Sel PCR#1	TAG_BX_AACTTCCTGGTT	121	G	G	A	40	32	8	G/A	0.8	SNP
Lib10^4_#1 200_Jm^2 U2OS Sel PCR#1	TAG_BX_AAGATGTATTGA	118	G	G	A	78	61	17	G/A	0.7821	SNP
Lib10^4_#1 200_Jm^2 U2OS Sel PCR#1	TAG_BX_AAGCATGCGTTT	126	G	G	T	32	24	7	G/T	0.75	SNP
Lib10^4_#1 200_Jm^2 U2OS Sel PCR#1	TAG_BX_AAGCTGATTTCT	118	G	G	A	43	37	4	G/A	0.8605	SNP
Lib10^4_#1 200_Jm^2 U2OS Sel PCR#1	TAG_BX_AAGTGCATGGAA	85	G	G	A	59	46	13	G/A	0.7797	SNP
Lib10^4_#1 200_Jm^2 U2OS Sel PCR#1	TAG_BX_AATACCCATCAA	5	G	G	A	23	22	1	G/A	0.9565	SNP
Lib10^4_#1 200_Jm^2 U2OS Sel PCR#1	TAG_BX_AATACCCATCAA	118	G	G	A	23	5	18	G/A	0.2174	SNP
Lib10^4_#1 200_Jm^2 U2OS Sel PCR#1	TAG_BX_AATACTTTGGGT	118	G	G	A	124	103	20	G/A	0.8306	SNP
Lib10^4_#1 200_Jm^2 U2OS Sel PCR#1	TAG_BX_AATACTTTGGGT	170	C	C	T	124	93	30	C/T	0.75	SNP
Lib10^4_#1 200_Jm^2 U2OS Sel PCR#1	TAG_BX_AATATTGACGCC	82	A	A	G	181	152	28	A/G	0.8398	SNP
Lib10^4_#1 200_Jm^2 U2OS Sel PCR#1	TAG_BX_AATCTGAAGGTT	89	C	CAGACTCTAAATCTGCCGT		23	18	5	CAGACTCTAAATCTGCCGT/	0.7826	Del
Lib10^4_#1 200_Jm^2 U2OS Sel PCR#1	TAG_BX_AATCTGTTTCGC	74	A	AG	CA	75	50	18	AG/CA	0.6667	DNP
Lib10^4_#1 200_Jm^2 U2OS Sel PCR#1	TAG_BX_AATGACGATCGT	112	G	GAC	TAA	19	14	2	GAC/TAA	0.7368	Del-In
Lib10^4_#1 200_Jm^2 U2OS Sel PCR#1	TAG_BX_AATGACGATCGT	112	G	G	T	19	3	2	G/T	0.1579	SNP
Lib10^4_#1 200_Jm^2 U2OS Sel PCR#1	TAG_BX_AATGACGGCCAT	39	G	G	A	56	46	7	G/A	0.8214	SNP
Lib10^4_#1 200_Jm^2 U2OS Sel PCR#1	TAG_BX_AATGACGGCCAT	82	A	A	G	56	49	7	A/G	0.875	SNP
Lib10^4_#1 200_Jm^2 U2OS Sel PCR#1	TAG_BX_AATTAGTATTGA	118	G	G	T	19	13	5	G/T	0.6842	SNP
Lib10^4_#1 200_Jm^2 U2OS Sel PCR#1	TAG_BX_AATTATGTTTTG	121	G	G	A	48	40	8	G/A	0.8333	SNP
Lib10^4_#1 200_Jm^2 U2OS Sel PCR#1	TAG_BX_AATTATTTGGAA	117	C	C	T	17	15	2	C/T	0.8824	SNP
Lib10^4_#1 200_Jm^2 U2OS Sel PCR#1	TAG_BX_AATTATTTGGAA	153	C	C	T	17	15	2	C/T	0.8824	SNP
Lib10^4_#1 200_Jm^2 U2OS Sel PCR#1	TAG_BX_AATTCACTTTGT	83	A	AG	TA	19	14	2	AG/TA	0.7368	DNP
Lib10^4_#1 200_Jm^2 U2OS Sel PCR#1	TAG_BX_AATTCAGGATGC	85	G	G	A	101	73	26	G/A	0.7228	SNP
Lib10^4_#1 200_Jm^2 U2OS Sel PCR#1	TAG_BX_AATTCAGGATGC	118	G	G	A	101	11	86	G/A	0.1089	SNP
Lib10^4_#1 200_Jm^2 U2OS Sel PCR#1	TAG_BX_AATTCTACGTAG	-15	T	T	C	15	14	1	T/C	0.9333	SNP
Lib10^4_#1 200_Jm^2 U2OS Sel PCR#1	TAG_BX_AATTCTCTTAAT	69	T	T	C	12	3	9	T/C	0.25	SNP
Lib10^4_#1 200_Jm^2 U2OS Sel PCR#1	TAG_BX_AATTCTCTTAAT	117	C	C	T	12	9	1	C/T	0.75	SNP
Lib10^4_#1 200_Jm^2 U2OS Sel PCR#1	TAG_BX_AATTTTATTACG	82	A	AAGG	TAGA	56	45	6	AAGG/TAGA	0.8036	Del-In
Lib10^4_#1 200_Jm^2 U2OS Sel PCR#1	TAG_BX_ACAAACTCGCAT	118	G	G	A	90	66	24	G/A	0.7333	SNP
Lib10^4_#1 200_Jm^2 U2OS Sel PCR#1	TAG_BX_ACAACTTCGCCT	5	G	G	A	20	18	2	G/A	0.9	SNP
Lib10^4_#1 200_Jm^2 U2OS Sel PCR#1	TAG_BX_ACAGTTATAGGC	118	G	G	A	55	42	12	G/A	0.7636	SNP
Lib10^4_#1 200_Jm^2 U2OS Sel PCR#1	TAG_BX_ACCCCTCCGGGG	7	T	T	A	14	11	3	T/A	0.7857	SNP
Lib10^4_#1 200_Jm^2 U2OS Sel PCR#1	TAG_BX_ACCCCTCCGGGG	147	C	C	T	14	2	12	C/T	0.1429	SNP
Lib10^4_#1 200_Jm^2 U2OS Sel PCR#1	TAG_BX_ACCCCTCGTCTT	121	G	G	A	41	35	5	G/A	0.8537	SNP
Lib10^4_#1 200_Jm^2 U2OS Sel PCR#1	TAG_BX_ACCGATAAGCAG	84	G	GG	AA	154	117	34	GG/AA	0.7597	DNP
Lib10^4_#1 200_Jm^2 U2OS Sel PCR#1	TAG_BX_ACCGCCGTTCTG	85	G	G	T	79	60	19	G/T	0.7595	SNP
Lib10^4_#1 200_Jm^2 U2OS Sel PCR#1	TAG_BX_ACCGCCGTTCTG	197	G	G	A	78	51	27	G/A	0.6538	SNP
Lib10^4_#1 200_Jm^2 U2OS Sel PCR#1	TAG_BX_ACCGGCAGGAGA	118	G	G	A	48	36	6	G/A	0.75	SNP
Lib10^4_#1 200_Jm^2 U2OS Sel PCR#1	TAG_BX_ACCTCTACGGCT	118	G	G	A	95	75	18	G/A	0.7895	SNP
Lib10^4_#1 200_Jm^2 U2OS Sel PCR#1	TAG_BX_ACCTGGGTATAA	118	G	G	A	89	62	22	G/A	0.6966	SNP
Lib10^4_#1 200_Jm^2 U2OS Sel PCR#1	TAG_BX_ACCTTTGTTTTG	131	C	C	A	67	50	15	C/A	0.7463	SNP
Lib10^4_#1 200_Jm^2 U2OS Sel PCR#1	TAG_BX_ACGACTTTAAGC	118	G	G	A	116	94	19	G/A	0.8103	SNP
Lib10^4_#1 200_Jm^2 U2OS Sel PCR#1	TAG_BX_ACGCATACTGGG	95	C	C	A	101	80	17	C/A	0.7921	SNP
Lib10^4_#1 200_Jm^2 U2OS Sel PCR#1	TAG_BX_ACGCGGCCTGAT	91	G	G	C	65	58	7	G/C	0.8923	SNP
Lib10^4_#1 200_Jm^2 U2OS Sel PCR#1	TAG_BX_ACGCTGGCCGGG	130	C	C	T	182	130	49	C/T	0.7143	SNP
Lib10^4_#1 200_Jm^2 U2OS Sel PCR#1	TAG_BX_ACGGGATCAGCC	134	C	C	G	42	28	12	C/G	0.6667	SNP
Lib10^4_#1 200_Jm^2 U2OS Sel PCR#1	TAG_BX_ACGGGTACGGTC	118	G	G	A	49	39	10	G/A	0.7959	SNP
Lib10^4_#1 200_Jm^2 U2OS Sel PCR#1	TAG_BX_ACGGTTCTGGGA	64	G	GG	AT	53	44	8	GG/AT	0.8302	DNP
Lib10^4_#1 200_Jm^2 U2OS Sel PCR#1	TAG_BX_ACGTAATGTTCC	34	G	G	A	172	157	11	G/A	0.9128	SNP
Lib10^4_#1 200_Jm^2 U2OS Sel PCR#1	TAG_BX_ACGTAATGTTCC	85	G	G	A	175	161	12	G/A	0.92	SNP
Lib10^4_#1 200_Jm^2 U2OS Sel PCR#1	TAG_BX_ACGTAGCGGTCC	112	G	GAC	AAA	64	38	16	GAC/AAA	0.5938	Del-In
Lib10^4_#1 200_Jm^2 U2OS Sel PCR#1	TAG_BX_ACGTAGCGGTCC	112	G	G	A	64	8	16	G/A	0.125	SNP
Lib10^4_#1 200_Jm^2 U2OS Sel PCR#1	TAG_BX_ACGTGCATTAAT	2	T	T		67	61	6	T/	0.9104	1Del
Lib10^4_#1 200_Jm^2 U2OS Sel PCR#1	TAG_BX_ACTATTGGCTTT	85	G	G	A	44	39	5	G/A	0.8864	SNP
Lib10^4_#1 200_Jm^2 U2OS Sel PCR#1	TAG_BX_ACTCTCATGTCT	73	G	G	A	60	47	12	G/A	0.7833	SNP
Lib10^4_#1 200_Jm^2 U2OS Sel PCR#1	TAG_BX_ACTCTCATGTCT	85	G	GG	AA	63	47	13	GG/AA	0.746	DNP
Lib10^4_#1 200_Jm^2 U2OS Sel PCR#1	TAG_BX_ACTGGATGTGAC	55	A	A	C	38	4	33	A/C	0.1053	SNP
Lib10^4_#1 200_Jm^2 U2OS Sel PCR#1	TAG_BX_ACTGGATGTGAC	118	G	G	A	38	26	11	G/A	0.6842	SNP
Lib10^4_#1 200_Jm^2 U2OS Sel PCR#1	TAG_BX_ACTTCATGGGTG	85	G	G	A	39	32	6	G/A	0.8205	SNP
Lib10^4_#1 200_Jm^2 U2OS Sel PCR#1	TAG_BX_ACTTGACCCCGC	118	G	G	T	51	41	7	G/T	0.8039	SNP
Lib10^4_#1 200_Jm^2 U2OS Sel PCR#1	TAG_BX_AGAAATAACAAT	118	G	G	A	65	48	15	G/A	0.7385	SNP
Lib10^4_#1 200_Jm^2 U2OS Sel PCR#1	TAG_BX_AGAAGGGATTTT	6	A	AT	TA	141	107	11	AT/TA	0.7589	DNP
Lib10^4_#1 200_Jm^2 U2OS Sel PCR#1	TAG_BX_AGACCGGGTACT	-16	T	T	A	63	56	4	T/A	0.8889	SNP
Lib10^4_#1 200_Jm^2 U2OS Sel PCR#1	TAG_BX_AGACCGGGTACT	114	C	C	T	63	46	14	C/T	0.7302	SNP
Lib10^4_#1 200_Jm^2 U2OS Sel PCR#1	TAG_BX_AGACGGCCGCTT	118	G	G	A	84	70	13	G/A	0.8333	SNP
Lib10^4_#1 200_Jm^2 U2OS Sel PCR#1	TAG_BX_AGACGTGGGTTG	102	T	T	A	74	23	51	T/A	0.3108	SNP
Lib10^4_#1 200_Jm^2 U2OS Sel PCR#1	TAG_BX_AGACGTGGGTTG	117	C	C	T	74	23	51	C/T	0.3108	SNP
Lib10^4_#1 200_Jm^2 U2OS Sel PCR#1	TAG_BX_AGACGTGGGTTG	118	G	G	A	74	38	36	G/A	0.5135	SNP
Lib10^4_#1 200_Jm^2 U2OS Sel PCR#1	TAG_BX_AGACTCCGTTTT	118	G	G	A	47	37	9	G/A	0.7872	SNP
Lib10^4_#1 200_Jm^2 U2OS Sel PCR#1	TAG_BX_AGAGACAACTGT	34	G	G	A	49	43	6	G/A	0.8776	SNP
Lib10^4_#1 200_Jm^2 U2OS Sel PCR#1	TAG_BX_AGAGACAACTGT	118	G	G	A	49	40	8	G/A	0.8163	SNP
Lib10^4_#1 200_Jm^2 U2OS Sel PCR#1	TAG_BX_AGAGAGCCTCCC	118	G	G	T	78	62	12	G/T	0.7949	SNP
Lib10^4_#1 200_Jm^2 U2OS Sel PCR#1	TAG_BX_AGAGTTATTAAC	131	C	C	T	65	46	18	C/T	0.7077	SNP
Lib10^4_#1 200_Jm^2 U2OS Sel PCR#1	TAG_BX_AGATAGCTTCTA	85	G	G	A	127	99	26	G/A	0.7795	SNP
Lib10^4_#1 200_Jm^2 U2OS Sel PCR#1	TAG_BX_AGATCAAAGCCT	121	G	G	A	141	116	25	G/A	0.8227	SNP
Lib10^4_#1 200_Jm^2 U2OS Sel PCR#1	TAG_BX_AGATCTTTCCAT	85	G	G	A	90	72	16	G/A	0.8	SNP
Lib10^4_#1 200_Jm^2 U2OS Sel PCR#1	TAG_BX_AGATGAGCTCCG	69	T	T	C	19	3	16	T/C	0.1579	SNP
Lib10^4_#1 200_Jm^2 U2OS Sel PCR#1	TAG_BX_AGATGAGCTCCG	85	G	G	A	19	2	17	G/A	0.1053	SNP
Lib10^4_#1 200_Jm^2 U2OS Sel PCR#1	TAG_BX_AGATGAGCTCCG	118	G	G	C	19	14	4	G/C	0.7368	SNP
Lib10^4_#1 200_Jm^2 U2OS Sel PCR#1	TAG_BX_AGATTTCTTGGT	86	G	GAG	AAA	73	54	16	GAG/AAA	0.7397	Del-In
Lib10^4_#1 200_Jm^2 U2OS Sel PCR#1	TAG_BX_AGCGTCTTCAAT	61	G	G	A	35	29	6	G/A	0.8286	SNP
Lib10^4_#1 200_Jm^2 U2OS Sel PCR#1	TAG_BX_AGCGTCTTCAAT	82	A	A	T	35	27	8	A/T	0.7714	SNP
Lib10^4_#1 200_Jm^2 U2OS Sel PCR#1	TAG_BX_AGCGTTAGGCTT	118	G	G	A	16	10	6	G/A	0.625	SNP
Lib10^4_#1 200_Jm^2 U2OS Sel PCR#1	TAG_BX_AGCGTTAGGCTT	121	G	G	A	16	2	14	G/A	0.125	SNP
Lib10^4_#1 200_Jm^2 U2OS Sel PCR#1	TAG_BX_AGCTTTATGCTT	118	G	G	A	42	29	11	G/A	0.6905	SNP
Lib10^4_#1 200_Jm^2 U2OS Sel PCR#1	TAG_BX_AGGAAGCACGCT	121	G	G	A	61	45	14	G/A	0.7377	SNP
Lib10^4_#1 200_Jm^2 U2OS Sel PCR#1	TAG_BX_AGGAGAATGGGA	118	G	G	A	44	32	11	G/A	0.7273	SNP
Lib10^4_#1 200_Jm^2 U2OS Sel PCR#1	TAG_BX_AGGCCTGGTGAT	121	G	G	A	114	93	19	G/A	0.8158	SNP
Lib10^4_#1 200_Jm^2 U2OS Sel PCR#1	TAG_BX_AGGCGATTAATT	130	C	C	A	74	52	21	C/A	0.7027	SNP
Lib10^4_#1 200_Jm^2 U2OS Sel PCR#1	TAG_BX_AGGCGTAATGAA	85	G	G	A	109	97	10	G/A	0.8899	SNP
Lib10^4_#1 200_Jm^2 U2OS Sel PCR#1	TAG_BX_AGGCGTAATGAA	126	G	G	A	108	88	19	G/A	0.8148	SNP
Lib10^4_#1 200_Jm^2 U2OS Sel PCR#1	TAG_BX_AGGCTTATATGC	5	G	GAT	AAA	32	29	1	GAT/AAA	0.9062	Del-In
Lib10^4_#1 200_Jm^2 U2OS Sel PCR#1	TAG_BX_AGGCTTATATGC	118	G	G	A	29	3	26	G/A	0.1034	SNP
Lib10^4_#1 200_Jm^2 U2OS Sel PCR#1	TAG_BX_AGGGTCTTTTTT	118	G	G	T	13	13	0	G/T	1	SNP
Lib10^4_#1 200_Jm^2 U2OS Sel PCR#1	TAG_BX_AGGGTTGCCGCG	95	C	C	G	15	13	2	C/G	0.8667	SNP
Lib10^4_#1 200_Jm^2 U2OS Sel PCR#1	TAG_BX_AGGGTTGCCGCG	160	C	C	T	15	10	5	C/T	0.6667	SNP
Lib10^4_#1 200_Jm^2 U2OS Sel PCR#1	TAG_BX_AGGGTTGCCGCG	190	C	C	T	15	11	4	C/T	0.7333	SNP
Lib10^4_#1 200_Jm^2 U2OS Sel PCR#1	TAG_BX_AGGGTTTTGAGG	-56	G	G	C	40	40	0	G/C	1	SNP
Lib10^4_#1 200_Jm^2 U2OS Sel PCR#1	TAG_BX_AGGGTTTTGAGG	5	G	G	C	40	36	2	G/C	0.9	SNP
Lib10^4_#1 200_Jm^2 U2OS Sel PCR#1	TAG_BX_AGGTGTCTTCTA	120	A	AG	TA	47	35	10	AG/TA	0.7447	DNP
Lib10^4_#1 200_Jm^2 U2OS Sel PCR#1	TAG_BX_AGGTGTCTTCTA	180	A	A	G	46	35	11	A/G	0.7609	SNP
Lib10^4_#1 200_Jm^2 U2OS Sel PCR#1	TAG_BX_AGGTTAAGACAT	118	G	G	A	89	70	18	G/A	0.7865	SNP
Lib10^4_#1 200_Jm^2 U2OS Sel PCR#1	TAG_BX_AGGTTACTATTT	73	G	GAG	AAA	228	97	105	GAG/AAA	0.4254	Del-In
Lib10^4_#1 200_Jm^2 U2OS Sel PCR#1	TAG_BX_AGGTTACTATTT	118	G	G	A	207	71	127	G/A	0.343	SNP
Lib10^4_#1 200_Jm^2 U2OS Sel PCR#1	TAG_BX_AGGTTTACAGCG	82	A	A	G	39	28	11	A/G	0.7179	SNP
Lib10^4_#1 200_Jm^2 U2OS Sel PCR#1	TAG_BX_AGGTTTACAGCG	118	G	G	A	39	6	33	G/A	0.1538	SNP
Lib10^4_#1 200_Jm^2 U2OS Sel PCR#1	TAG_BX_AGTAAATCAAGT	118	G	G	A	55	41	13	G/A	0.7455	SNP
Lib10^4_#1 200_Jm^2 U2OS Sel PCR#1	TAG_BX_AGTATCTGTTTG	118	G	G	A	34	4	30	G/A	0.1176	SNP
Lib10^4_#1 200_Jm^2 U2OS Sel PCR#1	TAG_BX_AGTATCTGTTTG	134	C	C	G	34	26	7	C/G	0.7647	SNP
Lib10^4_#1 200_Jm^2 U2OS Sel PCR#1	TAG_BX_AGTATTTTACGA	121	G	G	A	26	23	3	G/A	0.8846	SNP
Lib10^4_#1 200_Jm^2 U2OS Sel PCR#1	TAG_BX_AGTGATCGCACG	130	C	C	T	154	119	34	C/T	0.7727	SNP
Lib10^4_#1 200_Jm^2 U2OS Sel PCR#1	TAG_BX_AGTTAGGTCATA	134	C	C	A	29	20	8	C/A	0.6897	SNP
Lib10^4_#1 200_Jm^2 U2OS Sel PCR#1	TAG_BX_AGTTCGCTTTAT	5	G	G	A	16	15	1	G/A	0.9375	SNP
Lib10^4_#1 200_Jm^2 U2OS Sel PCR#1	TAG_BX_AGTTGTATTGGG	33	G	G	A	115	99	15	G/A	0.8609	SNP
Lib10^4_#1 200_Jm^2 U2OS Sel PCR#1	TAG_BX_AGTTGTATTGGG	64	G	GG	AA	120	103	12	GG/AA	0.8583	DNP
Lib10^4_#1 200_Jm^2 U2OS Sel PCR#1	TAG_BX_AGTTTGTCTCTT	118	G	G	A	119	89	26	G/A	0.7479	SNP
Lib10^4_#1 200_Jm^2 U2OS Sel PCR#1	TAG_BX_AGTTTTCGGTTT	117	C	C	A	20	16	3	C/A	0.8	SNP
Lib10^4_#1 200_Jm^2 U2OS Sel PCR#1	TAG_BX_ATAAGAATGATC	121	G	G	A	38	25	12	G/A	0.6579	SNP
Lib10^4_#1 200_Jm^2 U2OS Sel PCR#1	TAG_BX_ATAAGAATGATC	156	A	A	T	38	24	13	A/T	0.6316	SNP
[truncated: 10,331 more rows]

## Sheet: 6B
	# of mutations/BC	1	2	3	4	5	6	Total
Lib104_#1	0 J/m2	35	11	1	3	1	-	51
	50 J/m2	389	45	10	5	1	2	452
	100 J/m2	580	94	15	8	2	1	700
	200 J/m2	621	133	24	5	-	-	783
Lib104_#2	0 J/m2	67	21	8	2	-	-	98
	50 J/m2	396	55	9	3	-	2	465
	100 J/m2	555	78	15	6	3	-	657
	200 J/m2	645	144	28	5	-	1	823

## Sheet: 6C
	Lib104_#1				Lib104_#2
	0 J/m2	50 J/m2	100 J/m2	200 J/m2	0 J/m2	50 J/m2	100 J/m2	200 J/m2
1-Del	1 (1.3%)	7 (1.3%)	10 (1.2%)	12 (1.2%)	1 (0.7%)	4 (0.7%)	7 (0.9%)	11 (1.1%)
Del	1 (1.3%)	11 (2.0%)	9 (1.0%)	4 (0.4%)	8 (5.7%)	14 (2.5%)	1 (0.1%)	13 (1.2%)
DNS	-	25 (4.6%)	58 (6.7%)	76 (7.8%)	7 (5.0%)	21 (3.8%)	40 (5.0%)	94 (9.0%)
Ins	2 (2.6%)	46 (8.4%)	91 (10.6%)	80 (8.0%)	3 (2.1%)	50 (9.0%)	69 (8.7%)	115 (11.0%)
In-Del	-	3 (0.5%)	1 (0.1%)	2 (0.2%)	1 (0.7%)	1 (0.2%)	1 (0.1%)	6 (0.6%)
SNS	73 (94.8%)	454 (83.2%)	692 (80.4%)	805 (82.2%)	121 (85.8%)	467(83.8%)	677 (85.2%)	804 (77.1%)
Total	77 (100%)	546 (100%)	861 (100%)	979 (100%)	141 (100%)	557 (100%)	795 (100%)	1043 (100%)

## Sheet: 6D
	Lib104_#1				Lib104_#2
	0 J/m2	50 J/m2	100 J/m2	200 J/m2	0 J/m2	50 J/m2	100 J/m2	200 J/m2
A:T>C:G	-	1 (0.2%)	2 (0.3%)	9 (1.1%)	-	3 (0.6%)	2 (0.3%)	7 (090%)
A:T>G:C	-	20 (4.4%)	24 (3.5%)	40 (5.0%)	7 (5.8%)	20 (4.3%)	40 (5.9%)	49 (6.1%)
A:T>T:A	1 (1.4%)	6 (1.3%)	26 (3.8%)	47 (5.8%)	1 (0.8%)	22 (4.7%)	33 (4.9%)	42 (5.2%)
G:C>A:T	23 (31.5%)	333 (73.3%)	518 (74.9%)	583 (72.4%)	43 (35.5%)	309 (66.2%)	479 (70.8%)	565 (70.3%)
G:C>C:G	27 (37.0%)	53 (11.7%)	47 (6.8%)	33 (4.1%)	53 (43.8%)	63 (13.5%)	43 (6.4%)	31 (3.9%)
G:C>T:A	22 (30.1%)	41 (9.0%)	75 (10.8%)	93 (11.6%)	17 (14.0%)	50 (10.7%)	80 (11.8%)	110 (13.7%)
Total	73 (100%)	454 (100%)	692 (100%)	805 (100%)	121 (100%)	467 (100%)	677 (100%)	804 (100%)

## Sheet: 6E
						Lib104_#1																Lib104_#2
		Reference sequence (positions from -19 to 214)				0 J/m2				50 J/m2				100 J/m2				200 J/m2				0 J/m2				50 J/m2				100 J/m2				200 J/m2
Trinucleotide contexts		>A	>C	>G	>T	>A	>C	>G	>T	>A	>C	>G	>T	>A	>C	>G	>T	>A	>C	>G	>T	>A	>C	>G	>T	>A	>C	>G	>T	>A	>C	>G	>T	>A	>C	>G	>T
AAA	A>	8	-	-	-	-	-	-	-	-	-	4	2	-	-	4	5	-	1	11	11	-	-	-	-	-	1	1	2	-	-	6	7	-	-	14	10
AAC	A>	-	-	-	-	-	-	-	-	-	-	-	-	-	-	-	-	-	-	-	-	-	-	-	-	-	-	-	-	-	-	-	-	-	-	-	-
AAG	A>	6	-	-	-	-	-	-	-	-	-	-	-	-	-	-	-	-	1	-	2	-	-	-	-	-	1	-	-	-	-	1	3	-	1	1	1
AAT	A>	3	-	-	-	-	-	-	-	-	-	1	-	-	-	2	-	-	-	-	2	-	-	-	-	-	-	2	1	-	-	2	-	-	-	-	-
ACA	C>	-	2	-	-	-	-	-	-	-	-	1	-	-	-	-	-	-	-	3	-	-	-	2	-	-	-	1	-	-	-	2	2	-	-	2	-
ACC	C>	-	4	-	-	-	-	-	-	-	-	-	-	-	-	-	-	-	-	-	-	-	-	-	-	-	-	-	-	-	-	-	1	-	-	-	-
ACG	C>	-	-	-	-	-	-	-	-	-	-	-	-	-	-	-	-	-	-	-	-	-	-	-	-	-	-	-	-	-	-	-	-	-	-	-	-
ACT	C>	-	4	-	-	-	-	-	-	-	-	-	1	-	-	-	-	-	-	-	5	-	-	-	-	-	-	-	-	-	-	-	1	-	-	-	1
AGA	G>	-	-	2	-	-	1	-	-	3	2	-	1	6	5	-	-	2	2	-	-	3	6	-	1	5	8	-	-	5	4	-	1	3	1	-	1
AGC	G>	-	-	8	-	-	-	-	-	-	1	-	-	3	-	-	-	2	1	-	1	-	-	-	-	1	-	-	-	2	1	-	-	5	-	-	-
AGG	G>	-	-	4	-	-	-	-	-	21	2	-	2	48	-	-	3	53	-	-	6	-	-	-	1	27	1	-	5	41	-	-	4	58	1	-	7
AGT	G>	-	-	2	-	-	-	-	-	-	-	-	-	1	-	-	-	-	-	-	-	1	-	-	-	-	-	-	-	1	-	-	-	1	-	-	-
ATA	T>	-	-	-	4	-	-	-	-	-	-	-	-	2	2	-	-	4	3	-	-	-	-	-	-	3	4	-	-	3	1	-	-	2	1	1	-
ATC	T>	-	-	-	7	-	-	-	-	-	-	-	-	-	2	-	-	1	-	-	-	-	-	-	-	-	-	-	-	-	-	-	-	1	-	-	-
ATG	T>	-	-	-	3	-	-	-	-	-	3	-	-	2	-	-	-	1	-	1	-	1	6	-	-	3	2	-	-	-	1	-	-	2	1	-	-
ATT	T>	-	-	-	2	-	-	-	-	1	1	-	-	-	-	-	-	-	-	-	-	-	-	-	-	-	-	-	-	2	-	-	-	-	-	-	-
CAA	A>	2	-	-	-	-	-	-	-	-	-	-	1	-	-	2	1	-	-	-	1	-	-	-	-	-	-	-	-	-	-	1	-	-	-	2	1
CAC	A>	5	-	-	-	-	-	-	-	-	-	-	-	-	-	-	-	-	-	-	-	-	-	-	-	-	-	-	-	-	-	-	-	-	-	-	-
CAG	A>	7	-	-	-	-	-	-	-	-	-	-	-	-	-	-	-	-	-	1	-	-	-	-	-	-	-	-	-	-	-	-	-	-	-	-	-
CAT	A>	5	-	-	-	-	-	-	-	-	-	-	-	-	-	-	-	-	-	-	-	-	-	-	-	-	-	-	-	-	-	-	-	-	-	1	-
CCA	C>	-	5	-	-	-	-	-	-	1	-	-	-	2	-	-	-	2	-	-	3	-	-	-	-	-	-	-	3	-	-	-	5	2	-	-	4
CCC	C>	-	7	-	-	-	-	-	-	-	-	-	3	6	-	-	5	4	-	-	4	1	-	1	-	-	-	-	1	3	-	-	3	4	-	-	7
CCG	C>	-	6	-	-	-	-	-	-	-	-	-	2	1	-	-	3	-	-	-	6	-	-	-	1	-	-	-	1	2	-	-	1	2	-	-	5
CCT	C>	-	4	-	-	-	-	1	1	2	-	1	24	5	-	1	26	6	-	-	25	-	-	-	-	3	-	-	22	6	-	-	34	7	-	-	30
CGA	G>	-	-	7	-	3	8	-	3	103	6	-	4	213	5	-	13	240	4	-	17	7	7	-	1	96	9	-	7	179	5	-	18	225	3	-	21
CGC	G>	-	-	4	-	-	-	-	-	-	-	-	-	-	-	-	-	-	-	-	-	-	-	-	-	-	-	-	-	-	-	-	-	-	-	-	-
CGG	G>	-	-	4	-	-	-	-	-	-	-	-	1	1	-	-	-	1	-	-	-	-	-	-	-	-	-	-	-	-	-	-	-	6	-	-	-
CGT	G>	-	-	2	-	-	-	-	-	1	-	-	1	1	-	-	-	-	-	-	-	6	-	-	-	1	-	-	-	1	-	-	-	-	-	-	-
CTA	T>	-	-	-	1	-	-	-	-	-	3	1	-	3	1	-	-	1	4	-	-	-	-	-	-	8	2	-	-	2	7	-	-	5	3	1	-
CTC	T>	-	-	-	3	-	-	-	-	-	-	-	-	-	-	-	-	-	1	-	-	-	-	-	-	-	-	-	-	-	-	-	-	-	-	-	-
CTG	T>	-	-	-	2	-	-	-	-	-	1	-	-	-	-	-	-	-	-	-	-	-	-	-	-	-	-	-	-	-	-	1	-	-	-	-	-
CTT	T>	-	-	-	6	-	-	-	-	-	1	-	-	-	-	-	-	1	5	-	-	-	-	-	-	1	2	-	-	1	3	-	-	4	3	-	-
GAA	A>	3	-	-	-	-	-	-	-	-	-	-	-	-	-	-	-	-	-	-	1	-	-	-	-	-	-	-	-	-	-	1	1	-	-	2	-
GAC	A>	2	-	-	-	-	-	-	-	-	-	-	-	-	-	-	-	-	-	-	-	-	-	-	-	-	-	-	-	-	-	-	-	-	1	-	-
GAG	A>	3	-	-	-	-	-	-	-	-	-	2	-	-	-	1	-	-	-	3	-	-	-	-	-	-	-	1	-	-	-	2	-	-	1	3	1
GAT	A>	5	-	-	-	-	-	-	-	-	-	-	-	-	-	-	4	-	1	-	-	-	-	-	-	-	-	-	-	-	-	-	-	-	-	-	-
GCA	C>	-	6	-	-	-	-	-	-	1	-	-	-	1	-	-	2	1	-	-	-	2	-	-	-	-	-	1	-	1	-	1	-	2	-	-	-
GCC	C>	-	4	-	-	-	-	-	-	-	-	-	-	-	-	-	-	-	-	-	-	1	-	-	-	-	-	-	-	-	-	-	-	-	-	-	1
GCG	C>	-	8	-	-	-	-	-	-	-	-	-	1	-	-	1	-	-	-	-	-	-	-	-	-	-	-	-	-	-	-	-	-	-	-	-	-
GCT	C>	-	2	-	-	-	-	-	-	-	-	-	-	-	-	-	-	-	-	-	-	-	-	-	-	1	-	-	-	-	-	-	-	-	-	-	1
GGA	G>	-	-	2	-	-	-	-	-	-	1	-	-	6	1	-	3	6	-	-	-	-	-	-	-	2	2	-	1	4	4	-	1	5	1	-	3
GGC	G>	-	-	6	-	-	-	-	-	-	-	-	-	-	-	-	-	1	-	-	-	-	-	-	-	-	-	-	-	-	-	-	-	1	-	-	-
GGG	G>	-	-	4	-	-	-	-	-	6	-	-	-	36	1	-	1	40	1	-	2	2	1	-	-	21	2	-	5	36	-	-	4	29	1	-	3
GGT	G>	-	-	3	-	-	-	-	-	4	1	-	-	5	-	-	1	2	1	-	2	-	-	-	-	5	2	-	-	1	1	-	1	9	-	-	3
GTA	T>	-	-	-	1	-	-	-	-	-	-	-	-	-	-	-	-	-	-	-	-	-	-	-	-	-	-	-	-	-	-	-	-	-	-	-	-
GTC	T>	-	-	-	3	-	-	-	-	-	-	-	-	-	-	-	-	-	-	-	-	-	-	-	-	-	-	-	-	-	-	1	-	-	-	-	-
GTG	T>	-	-	-	2	-	-	-	-	-	-	-	-	-	-	-	-	-	-	-	-	-	-	-	-	-	-	-	-	-	-	-	-	-	-	-	-
GTT	T>	-	-	-	2	1	-	-	-	-	-	-	-	-	1	-	-	2	-	2	-	-	-	-	-	-	-	-	-	1	1	-	-	-	-	1	-
TAA	A>	4	-	-	-	-	-	-	-	-	-	2	2	-	1	5	4	-	1	7	16	-	-	1	-	-	1	4	2	-	-	6	9	-	-	14	7
TAC	A>	2	-	-	-	-	-	-	-	-	-	-	-	-	-	-	-	-	-	-	-	-	-	-	-	-	-	-	-	-	-	-	-	-	-	-	-
TAG	A>	-	-	-	-	-	-	-	-	-	-	-	-	-	-	-	-	-	-	-	-	-	-	-	-	-	-	-	-	-	-	-	-	-	-	-	-
TAT	A>	3	-	-	-	-	-	-	-	-	-	1	-	-	-	1	2	-	1	1	1	-	-	-	-	-	-	2	2	-	-	4	2	-	1	-	3
TCA	C>	-	6	-	-	2	-	-	5	2	-	7	9	3	-	1	9	4	-	1	22	-	-	1	3	5	-	-	9	3	-	2	15	3	-	1	23
TCC	C>	-	7	-	-	5	-	3	6	9	-	5	64	15	-	4	79	28	-	6	75	3	-	3	6	13	-	2	71	17	-	4	72	25	-	4	89
TCG	C>	-	3	-	-	7	-	-	7	9	-	2	55	15	-	2	34	10	-	-	51	1	-	2	6	5	-	3	19	5	-	3	18	9	-	2	29
TCT	C>	-	2	-	-	5	-	14	1	8	-	11	6	6	-	19	7	9	-	4	13	6	-	22	-	4	-	12	5	10	-	6	8	13	-	7	10
TGA	G>	-	-	2	-	-	-	-	-	30	12	-	-	30	7	-	-	30	10	-	1	8	8	-	-	19	20	-	-	46	10	-	4	20	8	-	4
TGC	G>	-	-	2	-	-	-	-	-	-	1	-	-	1	-	-	-	-	-	-	-	-	-	-	-	1	-	-	-	1	-	-	-	-	-	-	1
TGG	G>	-	-	3	-	-	-	-	-	-	-	-	-	2	-	-	-	2	-	-	-	-	-	-	-	-	-	-	-	2	-	-	-	2	-	-	-
TGT	G>	-	-	1	-	-	-	-	-	-	-	-	-	-	-	-	-	-	-	-	-	-	-	-	-	-	-	-	1	-	-	-	-	1	-	-	-
TTA	T>	-	-	-	3	-	-	-	-	-	-	-	-	1	-	-	-	1	-	-	-	-	-	-	-	-	-	-	-	-	-	-	-	-	2	-	-
TTC	T>	-	-	-	6	-	-	-	-	-	-	-	-	2	2	-	-	2	1	1	-	-	-	-	-	-	-	-	-	1	2	-	-	5	1	-	-
TTG	T>	-	-	-	1	-	-	-	-	-	-	-	-	-	-	-	-	-	1	-	-	-	-	-	-	-	-	-	-	-	-	-	-	-	-	-	-
TTT	T>	-	-	-	3	-	-	-	-	-	1	-	-	-	1	1	-	-	2	-	-	-	-	-	-	-	-	-	-	1	2	-	-	-	1	-	-
